# Supplementary material for: Deep sampling of Hawaiian Caenorhabditis elegans reveals high genetic diversity and admixture with global populations
Source: eLife journal article supplement (doi:10.7554/elife.50465), 2019-12-03

EC9A00  
 EC9A01  
 EC9A02  
 EC9A03  
 EC9A04  
 EC9A05  
 EC9A06  
 EC9A07  
 EC9A08  
 EC9A09  
 EC9A0A  
 EC9A0B  
 EC9A0C  
 EC9A0D  
 EC9A0E  
 EC9A0F  
 EC9A10  
 EC9A11  
 EC9A12  
 EC9A13  
 EC9A14  
 EC9A15  
 EC9A16  
 EC9A17  
 EC9A18  
 EC9A19  
 EC9A1A  
 EC9A1B  
 EC9A1C  
 EC9A1D  
 EC9A1E  
 EC9A1F  
 EC9A20  
 EC9A21  
 EC9A22  
 EC9A23  
 EC9A24  
 EC9A25  
 EC9A26  
 EC9A27  
 EC9A28  
 EC9A29  
 EC9A2A  
 EC9A2B  
 EC9A2C  
 EC9A2D  
 EC9A2E  
 EC9A2F  
 EC9A30  
 EC9A31  
 EC9A32  
 EC9A33  
 EC9A34  
 EC9A35  
 EC9A36  
 EC9A37  
 EC9A38  
 EC9A39  
 EC9A3A  
 EC9A3B  
 EC9A3C  
 EC9A3D  
 EC9A3E  
 EC9A3F  
 EC9A40  
 EC9A41  
 EC9A42  
 EC9A43  
 EC9A44  
 EC9A45  
 EC9A46  
 EC9A47  
 EC9A48  
 EC9A49  
 EC9A4A  
 EC9A4B  
 EC9A4C  
 EC9A4D  
 EC9A4E  
 EC9A4F  
 EC9A50  
 EC9A51  
 EC9A52  
 EC9A53  
 EC9A54  
 EC9A55  
 EC9A56  
 EC9A57  
 EC9A58  
 EC9A59  
 EC9A5A  
 EC9A5B  
 EC9A5C  
 EC9A5D  
 EC9A5E  
 EC9A5F  
 EC9A60  
 EC9A61  
 EC9A62  
 EC9A63  
 EC9A64  
 EC9A65  
 EC9A66  
 EC9A67  
 EC9A68  
 EC9A69  
 EC9A6A  
 EC9A6B  
 EC9A6C  
 EC9A6D  
 EC9A6E  
 EC9A6F  
 EC9A70  
 EC9A71  
 EC9A72  
 EC9A73  
 EC9A74  
 EC9A75  
 EC9A76  
 EC9A77  
 EC9A78  
 EC9A79  
 EC9A7A  
 EC9A7B  
 EC9A7C  
 EC9A7D  
 EC9A7E  
 EC9A7F  
 EC9A80  
 EC9A81  
 EC9A82  
 EC9A83  
 EC9A84  
 EC9A85  
 EC9A86  
 EC9A87  
 EC9A88  
 EC9A89  
 EC9A8A  
 EC9A8B  
 EC9A8C  
 EC9A8D  
 EC9A8E  
 EC9A8F  
 EC9A90  
 EC9A91  
 EC9A92  
 EC9A93  
 EC9A94  
 EC9A95  
 EC9A96  
 EC9A97  
 EC9A98  
 EC9A99  
 EC9A9A  
 EC9A9B  
 EC9A9C  
 EC9A9D  
 EC9A9E  
 EC9A9F  
 EC9AA0  
 EC9AA1  
 EC9AA2  
 EC9AA3  
 EC9AA4  
 EC9AA5  
 EC9AA6  
 EC9AA7  
 EC9AA8  
 EC9AA9  
 EC9AAA  
 EC9AAB  
 EC9AAC  
 EC9AAD  
 EC9AAE  
 EC9AAF  
 EC9AB0  
 EC9AB1  
 EC9AB2  
 EC9AB3  
 EC9AB4  
 EC9AB5  
 EC9AB6  
 EC9AB7  
 EC9AB8  
 EC9AB9  
 EC9ABA  
 EC9ABB  
 EC9ABC  
 EC9ABD  
 EC9ABE  
 EC9ABF  
 EC9AC0  
 EC9AC1  
 EC9AC2  
 EC9AC3  
 EC9AC4  
 EC9AC5  
 EC9AC6  
 EC9AC7  
 EC9AC8  
 EC9AC9  
 EC9ACA  
 EC9ACB  
 EC9ACC  
 EC9ACD  
 EC9ACE  
 EC9ACF  
 EC9AD0  
 EC9AD1  
 EC9AD2  
 EC9AD3  
 EC9AD4  
 EC9AD5  
 EC9AD6  
 EC9AD7  
 EC9AD8  
 EC9AD9  
 EC9ADA  
 EC9ADB  
 EC9ADC  
 EC9ADD  
 EC9ADE  
 EC9ADF  
 EC9AE0  
 EC9AE1  
 EC9AE2  
 EC9AE3  
 EC9AE4  
 EC9AE5  
 EC9AE6  
 EC9AE7  
 EC9AE8  
 EC9AE9  
 EC9AEA  
 EC9AEB  
 EC9AEC  
 EC9AED  
 EC9AEE  
 EC9AEF  
 EC9AF0  
 EC9AF1  
 EC9AF2  
 EC9AF3  
 EC9AF4  
 EC9AF5  
 EC9AF6  
 EC9AF7  
 EC9AF8  
 EC9AF9  
 EC9AFA  
 EC9AFB  
 EC9AFC  
 EC9AFD  
 EC9AFE  
 EC9AFF  
 EC9B00  
 EC9B01  
 EC9B02  
 EC9B03  
 EC9B04  
 EC9B05  
 EC9B06  
 EC9B07  
 EC9B08  
 EC9B09  
 EC9B0A  
 EC9B0B  
 EC9B0C  
 EC9B0D  
 EC9B0E  
 EC9B0F  
 EC9B10  
 EC9B11  
 EC9B12  
 EC9B13  
 EC9B14  
 EC9B15  
 EC9B16  
 EC9B17  
 EC9B18  
 EC9B19  
 EC9B1A  
 EC9B1B  
 EC9B1C  
 EC9B1D  
 EC9B1E  
 EC9B1F  
 EC9B20  
 EC9B21  
 EC9B22  
 EC9B23  
 EC9B24  
 EC9B25  
 EC9B26  
 EC9B27  
 EC9B28  
 EC9B29  
 EC9B2A  
 EC9B2B  
 EC9B2C  
 EC9B2D  
 EC9B2E  
 EC9B2F  
 EC9B30  
 EC9B31  
 EC9B32  
 EC9B33  
 EC9B34  
 EC9B35  
 EC9B36  
 EC9B37  
 EC9B38  
 EC9B39  
 EC9B3A  
 EC9B3B  
 EC9B3C  
 EC9B3D  
 EC9B3E  
 EC9B3F  
 EC9B40  
 EC9B41  
 EC9B42  
 EC9B43  
 EC9B44  
 EC9B45  
 EC9B46  
 EC9B47  
 EC9B48  
 EC9B49  
 EC9B4A  
 EC9B4B  
 EC9B4C  
 EC9B4D  
 EC9B4E  
 EC9B4F  
 EC9B50  
 EC9B51  
 EC9B52  
 EC9B53  
 EC9B54  
 EC9B55  
 EC9B56  
 EC9B57  
 EC9B58  
 EC9B59  
 EC9B5A  
 EC9B5B  
 EC9B5C  
 EC9B5D  
 EC9B5E  
 EC9B5F  
 EC9B60  
 EC9B61  
 EC9B62  
 EC9B63  
 EC9B64  
 EC9B65  
 EC9B66  
 EC9B67  
 EC9B68  
 EC9B69  
 EC9B6A  
 EC9B6B  
 EC9B6C  
 EC9B6D  
 EC9B6E  
 EC9B6F  
 EC9B70  
 EC9B71  
 EC9B72  
 EC9B73  
 EC9B74  
 EC9B75  
 EC9B76  
 EC9B77  
 EC9B78  
 EC9B79  
 EC9B7A  
 EC9B7B  
 EC9B7C  
 EC9B7D  
 EC9B7E  
 EC9B7F  
 EC9B80  
 EC9B81  
 EC9B82  
 EC9B83  
 EC9B84  
 EC9B85  
 EC9B86  
 EC9B87  
 EC9B88  
 EC9B89  
 EC9B8A  
 EC9B8B  
 EC9B8C  
 EC9B8D  
 EC9B8E  
 EC9B8F  
 EC9B90  
 EC9B91  
 EC9B92  
 EC9B93  
 EC9B94  
 EC9B95  
 EC9B96  
 EC9B97  
 EC9B98  
 EC9B99  
 EC9B9A  
 EC9B9B  
 EC9B9C  
 EC9B9D  
 EC9B9E  
 EC9B9F  
 EC9BA0  
 EC9BA1  
 EC9BA2  
 EC9BA3  
 EC9BA4  
 EC9BA5  
 EC9BA6  
 EC9BA7  
 EC9BA8  
 EC9BA9  
 EC9BAA  
 EC9BAB  
 EC9BAC  
 EC9BAD  
 EC9BAE  
 EC9BAF  
 EC9BB0  
 EC9BB1  
 EC9BB2  
 EC9BB3  
 EC9BB4  
 EC9BB5  
 EC9BB6  
 EC9BB7  
 EC9BB8  
 EC9BB9  
 EC9BBA  
 EC9BBB  
 EC9BBC  
 EC9BBD  
 EC9BBE  
 EC9BBF  
 EC9BC0  
 EC9BC1  
 EC9BC2  
 EC9BC3  
 EC9BC4  
 EC9BC5  
 EC9BC6  
 EC9BC7  
 EC9BC8  
 EC9BC9  
 EC9BCA  
 EC9BCB  
 EC9BCC  
 EC9BCD  
 EC9BCE  
 EC9BCF  
 EC9BD0  
 EC9BD1  
 EC9BD2  
 EC9BD3  
 EC9BD4  
 EC9BD5  
 EC9BD6  
 EC9BD7  
 EC9BD8  
 EC9BD9  
 EC

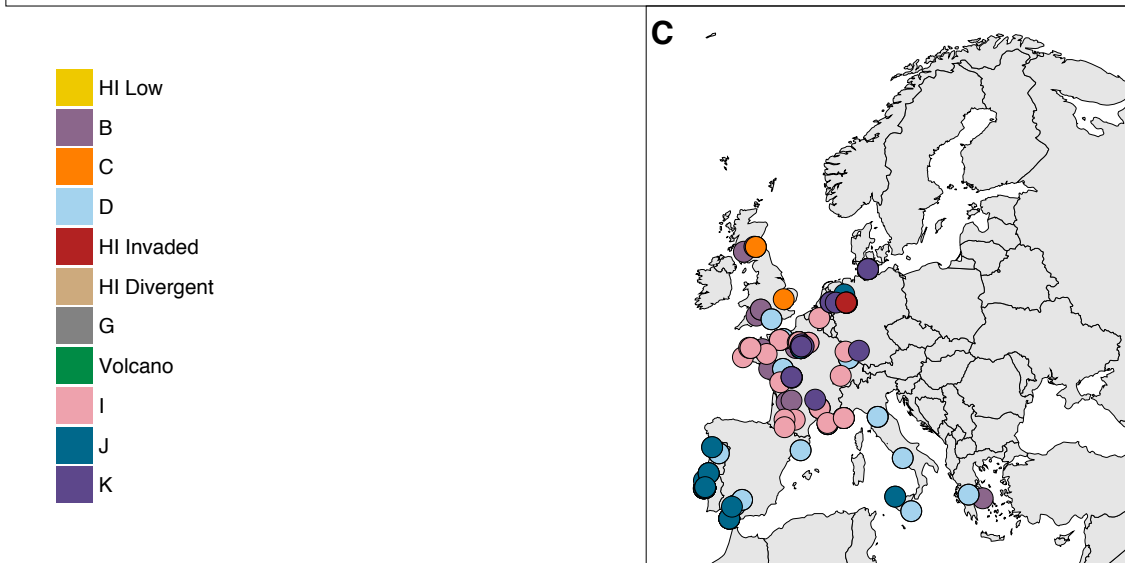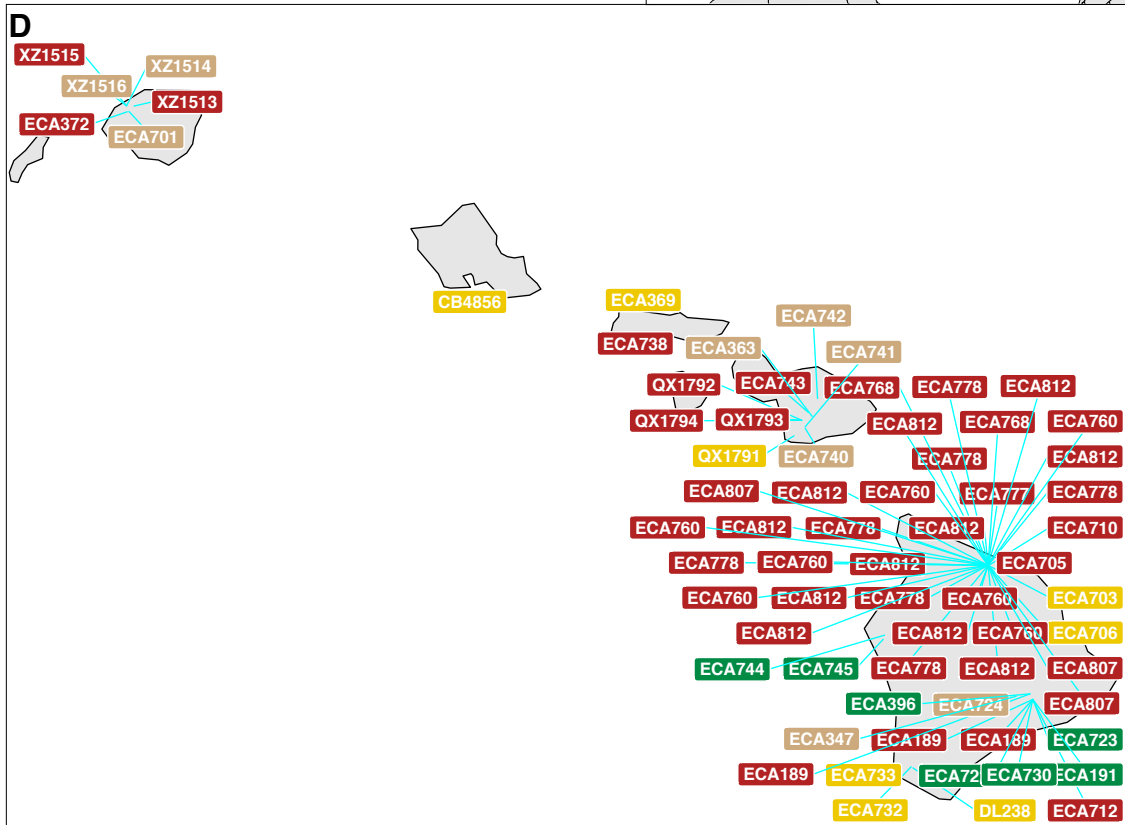

Supplement: supp [file elife_poa_e50465_Figure_5_figure_supplement_2.pdf › elife_poa_e50465_Figure_5_figure_supplement_2.pdf]
