# Supplementary material for: Deep sampling of Hawaiian Caenorhabditis elegans reveals high genetic diversity and admixture with global populations
Source: eLife journal article supplement (doi:10.7554/elife.50465), 2019-12-03
Supplement: supp [file elife-50465-supp-v1.zip]

Archive with 56 entries (56 files):
- elife_poa_e50465_Figure_6_source_data_2.csv
- elife_poa_e50465_Figure_4_figure_supplement_1.pdf
- elife_poa_e50465_Figure_7_figure_supplement_1.pdf
- elife_poa_e50465_Figure_6_source_data_3.csv
- elife_poa_e50465_Supplementary_file_4.docx
- elife_poa_e50465_Figure_3_source_data_1.csv
- elife_poa_e50465_Figure_6_figure_supplement_2_source_data_1.csv
- elife_poa_e50465_Figure_3_figure_supplement_2_source_data_1.csv
- elife_poa_e50465_Figure_5_figure_supplement_2_source_data_2.csv
- elife_poa_e50465_Supplementary_file_6.docx
- elife_poa_e50465_Figure_5_figure_supplement_4.pdf
- elife_poa_e50465_Figure_4_source_data_1.csv
- elife_poa_e50465_Supplementary_data_2.csv
- elife_poa_e50465_Figure_7_source_data_1.csv
- elife_poa_e50465_Figure_6_source_data_1.csv
- elife_poa_e50465_Figure_6_figure_supplement_1.pdf
- elife_poa_e50465_Figure_5_figure_supplement_3_source_data_1.csv
- elife_poa_e50465_Figure_3_figure_supplement_3_source_data_1.csv
- elife_poa_e50465_Figure_7_source_data_2.csv
- elife_poa_e50465_Figure_2_source_data_1.csv
- elife_poa_e50465_Figure_5_figure_supplement_4_source_data_3.zip
- elife_poa_e50465_Figure_4_source_data_2.csv
- elife_poa_e50465_Figure_3_figure_supplement_2.pdf
- elife_poa_e50465_Supplementary_file_1.docx
- elife_poa_e50465_Figure_5_figure_supplement_2_source_data_1.csv
- elife_poa_e50465_Figure_3_figure_supplement_3.pdf
- elife_poa_e50465_Figure_5_figure_supplement_1.pdf
- elife_poa_e50465_Figure_1_figure_supplement_2.pdf
- elife_poa_e50465_Figure_5_figure_supplement_4_source_data_1.csv
- elife_poa_e50465_Figure_6_figure_supplement_1_source_data_1.csv
- elife_poa_e50465_Figure_3_figure_supplement_1.pdf
- elife_poa_e50465_Figure_1_figure_supplement_1.pdf
- elife_poa_e50465_Figure_6_figure_supplement_2.pdf
- elife_poa_e50465_Figure_2_source_data_2.csv
- elife_poa_e50465_Figure_7_source_data_3.zip
- elife_poa_e50465_Figure_3_source_data_2.csv
- elife_poa_e50465_Supplementary_data_1.csv
- elife_poa_e50465_Figure_3_figure_supplement_1_source_data_1.csv
- elife_poa_e50465_Supplementary_file_3.docx
- elife_poa_e50465_Figure_4_figure_supplement_1_source_data_1.zip
- elife_poa_e50465_Figure_7_figure_supplement_1_source_data_1.zip
- elife_poa_e50465_Figure_1_source_data_1.csv
- elife_poa_e50465_Transparent_Reporting_File.pdf
- elife_poa_e50465_Figure_5_figure_supplement_1_source_data_1.csv
- elife_poa_e50465_Figure_7_figure_supplement_2.pdf
- elife_poa_e50465_Figure_7_figure_supplement_2_source_data_1.csv
- elife_poa_e50465_Figure_5_figure_supplement_2.pdf
- elife_poa_e50465_Figure_3_figure_supplement_3_source_data_2.csv
- elife_poa_e50465_Figure_5_figure_supplement_3.pdf
- elife_poa_e50465_Figure_5_figure_supplement_4_source_data_2.csv
- elife_poa_e50465_Figure_5_figure_supplement_1_source_data_2.csv
- elife_poa_e50465_Figure_5_source_data_1.zip
- elife_poa_e50465_Figure_5_source_data_3.csv
- elife_poa_e50465_Figure_5_source_data_2.zip
- elife_poa_e50465_Supplementary_file_5.docx
- elife_poa_e50465_Supplementary_file_2.docx
