# Supplementary material for: Deep sampling of Hawaiian Caenorhabditis elegans reveals high genetic diversity and admixture with global populations
Source: eLife journal article supplement (doi:10.7554/elife.50465), 2019-12-03
Supplement: supp [file elife-50465-supp-v1.zip › elife_poa_e50465_Figure_1_source_data_1.csv]

c_label	collection_type	island	species_id	pcr_positive	worms_on_sample	longitude	latitude	multiple_type
C-0003	No Nematode	Oahu	NA	NA	No	-157.724325	21.306158	no
C-0005	No Nematode	Oahu	NA	NA	No	-157.724275	21.307294	no
C-0010	No Nematode	Oahu	NA	NA	No	-157.722608	21.308633	no
C-0011	No Nematode	Oahu	NA	NA	No	-157.722578	21.307575	no
C-0013	No Nematode	Oahu	NA	NA	No	-157.721008	21.309486	no
C-0017	No Nematode	Oahu	NA	NA	No	-157.722581	21.314208	no
C-0018	No Nematode	Oahu	NA	NA	No	-157.723625	21.318233	no
C-0019	No Nematode	Oahu	NA	NA	No	-157.723114	21.320464	no
C-0020	No Nematode	Oahu	NA	NA	No	-157.723381	21.315164	no
C-0023	No Nematode	Oahu	NA	NA	No	-157.721069	21.311078	no
C-0024	No Nematode	Oahu	NA	NA	No	-157.781353	21.364092	no
C-0031	No Nematode	Oahu	NA	NA	No	-157.80604400000001	21.385858	no
C-0033	No Nematode	Oahu	NA	NA	No	-157.806431	21.385447	no
C-0035	No Nematode	Oahu	NA	NA	No	-157.803261	21.386431	no
C-0042	No Nematode	Oahu	NA	NA	No	-157.856792	21.315672	no
C-0044	No Nematode	Oahu	NA	NA	No	-157.80075	21.333839	no
C-0054	No Nematode	Oahu	NA	NA	No	-157.808464	21.353181	no
C-0060	No Nematode	Oahu	NA	NA	No	-157.799472	21.341519	no
C-0064	No Nematode	Oahu	NA	NA	No	-157.806275	21.350156	no
C-0067	No Nematode	Oahu	NA	NA	No	-157.805486	21.3487	no
C-0069	No Nematode	Oahu	NA	NA	No	-157.806331	21.350806	no
C-0074	No Nematode	Oahu	NA	NA	No	-157.8101	21.354156	no
C-0079	No Nematode	Oahu	NA	NA	No	-157.780628	21.362875	no
C-0082	No Nematode	Oahu	NA	NA	No	-158.017478	21.502681	no
C-0083	No Nematode	Oahu	NA	NA	No	-158.016658	21.503153	no
C-0086	No Nematode	Oahu	NA	NA	No	-158.017994	21.503111	no
C-0091	No Nematode	Oahu	NA	NA	No	-158.017917	21.503139	no
C-0099	No Nematode	Oahu	NA	NA	No	-157.857072	21.315656	no
C-0100	No Nematode	Oahu	NA	NA	No	-158.017933	21.503017	no
C-0101	No Nematode	Kauai	NA	NA	No	-159.617039	22.152778	no
C-0102	No Nematode	Kauai	NA	NA	No	-159.617561	22.154833	no
C-0103	No Nematode	Kauai	NA	NA	No	-159.617533	22.154844	no
C-0104	No Nematode	Kauai	NA	NA	No	-159.593858	22.195653	no
C-0105	No Nematode	Kauai	NA	NA	No	-159.594075	22.188428	no
C-0108	No Nematode	Kauai	NA	NA	No	-159.594275	22.191953	no
C-0111	No Nematode	Kauai	NA	NA	No	-159.594789	22.198514	no
C-0115	No Nematode	Kauai	NA	NA	No	-159.597183	22.207175	no
C-0116	No Nematode	Kauai	NA	NA	No	-159.597225	22.207206	no
C-0118	No Nematode	Kauai	NA	NA	No	-159.595936	22.211186	no
C-0120	No Nematode	Kauai	NA	NA	No	-159.587769	22.215311	no
C-0121	No Nematode	Kauai	NA	NA	No	-159.587106	22.217619	no
C-0126	No Nematode	Kauai	NA	NA	No	-159.664444	22.121964	no
C-0127	No Nematode	Kauai	NA	NA	No	-159.664386	22.121817	no
C-0128	No Nematode	Kauai	NA	NA	No	-159.664467	22.121947	no
C-0130	No Nematode	Kauai	NA	NA	No	-159.615089	22.151486	no
C-0131	No Nematode	Kauai	NA	NA	No	-159.622742	22.149989	no
C-0132	No Nematode	Kauai	NA	NA	No	-159.6372	22.150097	no
C-0133	No Nematode	Kauai	NA	NA	No	-159.619542	22.153286	no
C-0134	No Nematode	Kauai	NA	NA	No	-159.615233	22.151994	no
C-0135	No Nematode	Kauai	NA	NA	No	-159.622492	22.150256	no
C-0136	No Nematode	Kauai	NA	NA	No	-159.616522	22.147131	no
C-0137	No Nematode	Kauai	NA	NA	No	-159.616339	22.148314	no
C-0140	No Nematode	Kauai	NA	NA	No	-159.613314	22.146942	no
C-0141	No Nematode	Kauai	NA	NA	No	-159.609069	22.147194	no
C-0142	No Nematode	Kauai	NA	NA	No	-159.608128	22.147297	no
C-0144	No Nematode	Kauai	NA	NA	No	-159.615575	22.149286	no
C-0146	No Nematode	Kauai	NA	NA	No	-159.621833	22.151181	no
C-0148	No Nematode	Kauai	NA	NA	No	-159.627419	22.148386	no
C-0150	No Nematode	Kauai	NA	NA	No	-159.664386	22.121875	no
C-0153	No Nematode	Kauai	NA	NA	No	-159.600086	22.152175	no
C-0155	No Nematode	Kauai	NA	NA	No	-159.646003	22.145592	no
C-0159	No Nematode	Kauai	NA	NA	No	-159.6728785	22.02581977	no
C-0160	No Nematode	Kauai	NA	NA	No	-159.601736	22.150972	no
C-0161	No Nematode	Kauai	NA	NA	No	-159.604289	22.148664	no
C-0166	No Nematode	Kauai	NA	NA	No	-159.604775	22.148064	no
C-0167	No Nematode	Kauai	NA	NA	No	-159.608361	22.147378	no
C-0168	No Nematode	Kauai	NA	NA	No	-159.609392	22.1471	no
C-0174	No Nematode	Kauai	NA	NA	No	-159.615767	22.149047	no
C-0175	No Nematode	Kauai	NA	NA	No	-159.6152487	22.14965518	no
C-0176	No Nematode	Kauai	NA	NA	No	-159.593711	22.195997	no
C-0177	No Nematode	Kauai	NA	NA	No	-159.594025	22.188419	no
C-0179	No Nematode	Kauai	NA	NA	No	-159.628947	22.148514	no
C-0183	No Nematode	Kauai	NA	NA	No	-159.588044	22.216108	no
C-0184	No Nematode	Kauai	NA	NA	No	-159.589864	22.214086000000002	no
C-0187	No Nematode	Kauai	NA	NA	No	-159.592897	22.211747	no
C-0193	No Nematode	Kauai	NA	NA	No	-159.63105	22.147853	no
C-0194	No Nematode	Kauai	NA	NA	No	-159.593669	22.1959	no
C-0196	No Nematode	Kauai	NA	NA	No	-159.594958	22.200444	no
C-0197	No Nematode	Kauai	NA	NA	No	-159.595942	22.203128	no
C-0200	No Nematode	Kauai	NA	NA	No	-159.584811	22.219217	no
C-0201	No Nematode	Kauai	NA	NA	No	-159.584769	22.219175	no
C-0203	No Nematode	Kauai	NA	NA	No	-159.587789	22.215442	no
C-0205	No Nematode	Kauai	NA	NA	No	-159.592808	22.211811	no
C-0206	No Nematode	Kauai	NA	NA	No	-159.596422	22.210017	no
C-0208	No Nematode	Kauai	NA	NA	No	-159.597425	22.207722	no
C-0209	No Nematode	Kauai	NA	NA	No	-159.597442	22.206228	no
C-0210	No Nematode	Kauai	NA	NA	No	-159.596519	22.20465	no
C-0212	No Nematode	Kauai	NA	NA	No	-159.619678	22.153225	no
C-0213	No Nematode	Kauai	NA	NA	No	-159.6306944	22.1479449	no
C-0214	No Nematode	Kauai	NA	NA	No	-159.621175	22.151697	no
C-0215	No Nematode	Kauai	NA	NA	No	-159.593939	22.190778	no
C-0219	No Nematode	Kauai	NA	NA	No	-159.6217	22.151119	no
C-0220	No Nematode	Kauai	NA	NA	No	-159.594708	22.198578	no
C-0222	No Nematode	Kauai	NA	NA	No	-159.593681	22.193964	no
C-0226	No Nematode	Kauai	NA	NA	No	-159.6239042	22.15699653	no
C-0227	No Nematode	Kauai	NA	NA	No	-159.6239042	22.15699653	no
C-0228	No Nematode	Kauai	NA	NA	No	-159.641155	22.133923	no
C-0234	No Nematode	Kauai	NA	NA	No	-159.6399866	22.13326248	no
C-0237	No Nematode	Kauai	NA	NA	No	-159.628303	21.987369	no
C-0241	No Nematode	Kauai	NA	NA	No	-159.657766	22.13017836	no
C-0243	No Nematode	Kauai	NA	NA	No	-159.670761	22.113939	no
C-0244	No Nematode	Kauai	NA	NA	No	-159.665781	22.120075	no
C-0246	No Nematode	Kauai	NA	NA	No	-159.6582361	22.12957813	no
C-0248	No Nematode	Kauai	NA	NA	No	-159.644767	22.150661	no
C-0249	No Nematode	Kauai	NA	NA	No	-159.651317	22.140033	no
C-0250	No Nematode	Kauai	NA	NA	No	-159.64475	22.150686	no
C-0252	No Nematode	Kauai	NA	NA	No	-159.422264	22.076797	no
C-0254	No Nematode	Kauai	NA	NA	No	-159.421553	22.075475	no
C-0258	No Nematode	Kauai	NA	NA	No	-159.422911	22.078806	no
C-0267	No Nematode	Kauai	NA	NA	No	-159.375597	22.100683	no
C-0278	No Nematode	Kauai	NA	NA	No	-159.386714	22.102517	no
C-0279	No Nematode	Kauai	NA	NA	No	-159.386303	22.102336	no
C-0294	No Nematode	Kauai	NA	NA	No	-159.426028	22.081625	no
C-0299	No Nematode	Kauai	NA	NA	No	-159.425992	22.08165	no
C-0303	No Nematode	Maui	NA	NA	No	-156.534836	20.950294	no
C-0305	No Nematode	Kauai	NA	NA	No	-159.472944	22.201819	no
C-0306	No Nematode	Kauai	NA	NA	No	-159.475231	22.199281	no
C-0310	No Nematode	Kauai	NA	NA	No	-159.475622	22.19905	no
C-0311	No Nematode	Maui	NA	NA	No	-156.535222	20.949369	no
C-0313	No Nematode	Kauai	NA	NA	No	-159.473428	22.201731	no
C-0315	No Nematode	Maui	NA	NA	No	-156.53525	20.949458	no
C-0318	No Nematode	Kauai	NA	NA	No	-159.476633	22.198506	no
C-0319	No Nematode	Maui	NA	NA	No	-156.535258	20.949322	no
C-0321	No Nematode	Kauai	NA	NA	No	-159.473281	22.201853	no
C-0322	No Nematode	Kauai	NA	NA	No	-159.476922	22.198364	no
C-0323	No Nematode	Maui	NA	NA	No	-156.535181	20.949264	no
C-0325	No Nematode	Kauai	NA	NA	No	-159.474025	22.201458	no
C-0326	No Nematode	Kauai	NA	NA	No	-159.4769475	22.1977058	no
C-0328	No Nematode	Maui	NA	NA	No	-156.334481	20.672561	no
C-0329	No Nematode	Kauai	NA	NA	No	-159.474047	22.201508	no
C-0330	No Nematode	Kauai	NA	NA	No	-159.477197	22.198133	no
C-0334	No Nematode	Kauai	NA	NA	No	-159.47735	22.198253	no
C-0335	No Nematode	Maui	NA	NA	No	-156.535347	20.949575	no
C-0338	No Nematode	Kauai	NA	NA	No	-159.477256	22.198564	no
C-0339	No Nematode	Maui	NA	NA	No	-156.535883	20.94872137	no
C-0341	No Nematode	Kauai	NA	NA	No	-159.474814	22.200528	no
C-0344	No Nematode	Maui	NA	NA	No	-156.337161	20.669839	no
C-0345	No Nematode	Kauai	NA	NA	No	-159.474839	22.200406	no
C-0346	No Nematode	Maui	NA	NA	No	-156.5453	20.881058	no
C-0348	No Nematode	Maui	NA	NA	No	-156.337236	20.669414	no
C-0349	No Nematode	Kauai	NA	NA	No	-159.47495	22.200214	no
C-0350	No Nematode	Maui	NA	NA	No	-156.533232	20.951985	no
C-0353	No Nematode	Kauai	NA	NA	No	-159.474708	22.199775	no
C-0356	No Nematode	Maui	NA	NA	No	-156.329594	20.681069	no
C-0357	No Nematode	Kauai	NA	NA	No	-159.474656	22.199572	no
C-0358	No Nematode	Maui	NA	NA	No	-156.534407	20.951076	no
C-0362	No Nematode	Kauai	NA	NA	No	-159.6577895	22.13011428	no
C-0363	No Nematode	Kauai	NA	NA	No	-159.660433	22.131558	no
C-0366	No Nematode	Kauai	NA	NA	No	-159.6718773	22.1144129	no
C-0367	No Nematode	Kauai	NA	NA	No	-159.660478	22.131542	no
C-0369	No Nematode	Maui	NA	NA	No	-156.332969	20.6738	no
C-0370	No Nematode	Kauai	NA	NA	No	-159.6716998	22.1145742	no
C-0371	No Nematode	Kauai	NA	NA	No	-159.660511	22.131447	no
C-0374	No Nematode	Kauai	NA	NA	No	-159.6716988	22.1150324	no
C-0375	No Nematode	Kauai	NA	NA	No	-159.6604613	22.1314956	no
C-0377	No Nematode	Maui	NA	NA	No	-156.332497	20.673239	no
C-0378	No Nematode	Kauai	NA	NA	No	-159.664014	22.134183	no
C-0382	No Nematode	Kauai	NA	NA	No	-159.6718528	22.1155139	no
C-0383	No Nematode	Kauai	NA	NA	No	-159.660447	22.131669	no
C-0386	No Nematode	Kauai	NA	NA	No	-159.6718576	22.1143876	no
C-0387	No Nematode	Kauai	NA	NA	No	-159.660856	22.133317	no
C-0391	No Nematode	Kauai	NA	NA	No	-159.660094	22.132169	no
C-0395	No Nematode	Kauai	NA	NA	No	-159.661356	22.133906	no
C-0396	No Nematode	Maui	NA	NA	No	-156.0967159	20.8073683	no
C-0398	No Nematode	Kauai	NA	NA	No	-159.6602421	22.13115619	no
C-0399	No Nematode	Kauai	NA	NA	No	-159.66215	22.133772	no
C-0402	No Nematode	Kauai	NA	NA	No	-159.660122	22.129553	no
C-0410	No Nematode	Kauai	NA	NA	No	-159.660286	22.13025	no
C-0413	No Nematode	Maui	NA	NA	No	-156.331653	20.676756	no
C-0414	No Nematode	Kauai	NA	NA	No	-159.660406	22.131561	no
C-0415	No Nematode	Maui	NA	NA	No	-156.009784	20.78249	no
C-0427	No Nematode	Kauai	NA	NA	No	-159.422453	22.077358	no
C-0434	No Nematode	Kauai	NA	NA	No	-159.427186	22.088803	no
C-0436	No Nematode	Kauai	NA	NA	No	-159.430589	22.090406	no
C-0438	No Nematode	Kauai	NA	NA	No	-159.425242	22.080664	no
C-0441	No Nematode	Kauai	NA	NA	No	-159.426094	22.081272	no
C-0443	No Nematode	Kauai	NA	NA	No	-159.426797	22.084394	no
C-0446	No Nematode	Kauai	NA	NA	No	-159.4153549	22.07342818	no
C-0452	No Nematode	Kauai	NA	NA	No	-159.663133	22.043475	no
C-0453	No Nematode	Kauai	NA	NA	No	-159.679911	22.026739	no
C-0454	No Nematode	Kauai	NA	NA	No	-159.674919	22.0298	no
C-0455	No Nematode	Kauai	NA	NA	No	-159.467992	21.931828	no
C-0457	No Nematode	Kauai	NA	NA	No	-159.674942	22.029775	no
C-0458	No Nematode	Kauai	NA	NA	No	-159.659317	22.118808	no
C-0461	No Nematode	Kauai	NA	NA	No	-159.657619	22.122519	no
C-0462	No Nematode	Kauai	NA	NA	No	-159.656808	22.122633	no
C-0464	No Nematode	Kauai	NA	NA	No	-159.656364	22.123478	no
C-0468	No Nematode	Kauai	NA	NA	No	-159.414397	22.074258	no
C-0472	No Nematode	Kauai	NA	NA	No	-159.619833	22.153172	no
C-0473	No Nematode	Kauai	NA	NA	No	-159.625544	22.148703	no
C-0474	No Nematode	Kauai	NA	NA	No	-159.619153	22.153892	no
C-0477	No Nematode	Kauai	NA	NA	No	-159.614978	22.150281	no
C-0478	No Nematode	Kauai	NA	NA	No	-159.626564	22.148244	no
C-0480	No Nematode	Kauai	NA	NA	No	-159.664469	22.121828	no
C-0481	No Nematode	Kauai	NA	NA	No	-159.640166	22.14763	no
C-0482	No Nematode	Kauai	NA	NA	No	-159.6399113	22.1469084	no
C-0483	No Nematode	Kauai	NA	NA	No	-159.641373	22.149137	no
C-0484	No Nematode	Kauai	NA	NA	No	-159.641378	22.149103	no
C-0494	No Nematode	Kauai	NA	NA	No	-159.641347	22.149134	no
C-0496	No Nematode	Kauai	NA	NA	No	-159.608839	22.147381	no
C-0497	No Nematode	Kauai	NA	NA	No	-159.61267	22.146757	no
C-0498	No Nematode	Kauai	NA	NA	No	-159.617546	22.147214	no
C-0499	No Nematode	Kauai	NA	NA	No	-159.6155513	22.1491967	no
C-0500	No Nematode	Kauai	NA	NA	No	-159.616875	22.152361	no
C-0503	No Nematode	Kauai	NA	NA	No	-159.625561	22.148761	no
C-0504	No Nematode	Kauai	NA	NA	No	-159.627723	22.148308	no
C-0505	No Nematode	Kauai	NA	NA	No	-159.6279999	22.14832755	no
C-0506	No Nematode	Kauai	NA	NA	No	-159.606147	22.147506	no
C-0507	No Nematode	Kauai	NA	NA	No	-159.608131	22.147303	no
C-0508	No Nematode	Kauai	NA	NA	No	-159.598953	22.153181	no
C-0510	No Nematode	Kauai	NA	NA	No	-159.67	22.115511	no
C-0511	No Nematode	Kauai	NA	NA	No	-159.648064	22.144058	no
C-0514	No Nematode	Kauai	NA	NA	No	-159.649133	22.140817	no
C-0515	No Nematode	Kauai	NA	NA	No	-159.669867	22.115422	no
C-0517	No Nematode	Kauai	NA	NA	No	-159.660397	22.132608	no
C-0518	No Nematode	Kauai	NA	NA	No	-159.660186	22.132272	no
C-0519	No Nematode	Kauai	NA	NA	No	-159.660439	22.131492	no
C-0521	No Nematode	Kauai	NA	NA	No	-159.6272109	22.148258	no
C-0530	No Nematode	Kauai	NA	NA	No	-159.608517	22.147428	no
C-0532	No Nematode	Kauai	NA	NA	No	-159.561089	21.900089	no
C-0535	No Nematode	Kauai	NA	NA	No	-159.660036	22.131989	no
C-0539	No Nematode	Kauai	NA	NA	No	-159.660617	22.132772	no
C-0540	No Nematode	Kauai	NA	NA	No	-159.660686	22.132761	no
C-0541	No Nematode	Kauai	NA	NA	No	-159.642844	22.137622	no
C-0542	No Nematode	Kauai	NA	NA	No	-159.6399011	22.1457871	no
C-0543	No Nematode	Kauai	NA	NA	No	-159.643478	22.137228	no
C-0547	No Nematode	Kauai	NA	NA	No	-159.657764	22.130136	no
C-0548	No Nematode	Kauai	NA	NA	No	-159.6632963	22.12497307	no
C-0550	No Nematode	Kauai	NA	NA	No	-159.413867	22.076328	no
C-0552	No Nematode	Kauai	NA	NA	No	-159.412692	22.081719	no
C-0553	No Nematode	Kauai	NA	NA	No	-159.413667	22.075069	no
C-0554	No Nematode	Kauai	NA	NA	No	-159.412764	22.084658	no
C-0556	No Nematode	Kauai	NA	NA	No	-159.412339	22.084003	no
C-0557	No Nematode	Kauai	NA	NA	No	-159.4126693	22.07822276	no
C-0559	No Nematode	Kauai	NA	NA	No	-159.412983	22.078697	no
C-0565	No Nematode	Kauai	NA	NA	No	-159.6417974	22.14295	no
C-0567	No Nematode	Kauai	NA	NA	No	-159.6644049	22.12187081	no
C-0568	No Nematode	Kauai	NA	NA	No	-159.664439	22.121875	no
C-0570	No Nematode	Kauai	NA	NA	No	-159.6235273	22.1495201	no
C-0571	No Nematode	Kauai	NA	NA	No	-159.62353	22.149479	no
C-0573	No Nematode	Kauai	NA	NA	No	-159.6212967	22.1514465	no
C-0574	No Nematode	Kauai	NA	NA	No	-159.6197055	22.1533803	no
C-0575	No Nematode	Kauai	NA	NA	No	-159.619179	22.154028	no
C-0577	No Nematode	Kauai	NA	NA	No	-159.618819	22.153873	no
C-0578	No Nematode	Kauai	NA	NA	No	-159.617266	22.1534567	no
C-0579	No Nematode	Kauai	NA	NA	No	-159.6459426	22.1510517	no
C-0581	No Nematode	Kauai	NA	NA	No	-159.6149992	22.1499761	no
C-0582	No Nematode	Kauai	NA	NA	No	-159.616589	22.148081	no
C-0583	No Nematode	Kauai	NA	NA	No	-159.6112	22.146186	no
C-0584	No Nematode	Kauai	NA	NA	No	-159.6044529	22.1482089	no
C-0585	No Nematode	Kauai	NA	NA	No	-159.600125	22.152461	no
C-0586	No Nematode	Kauai	NA	NA	No	-159.599392	22.154706	no
C-0587	No Nematode	Kauai	NA	NA	No	-159.664387	22.1219	no
C-0590	No Nematode	Kauai	NA	NA	No	-159.6644049	22.12187081	no
C-0591	No Nematode	Kauai	NA	NA	No	-159.661294	22.133733	no
C-0594	No Nematode	Kauai	NA	NA	No	-159.6621	22.133706	no
C-0595	No Nematode	Kauai	NA	NA	No	-159.662167	22.133764	no
C-0597	No Nematode	Kauai	NA	NA	No	-159.662922	22.134217	no
C-0598	No Nematode	Kauai	NA	NA	No	-159.663589	22.134256	no
C-0599	No Nematode	Kauai	NA	NA	No	-159.649411	22.141244	no
C-0605	No Nematode	Kauai	NA	NA	No	-159.6127	22.146669	no
C-0607	No Nematode	Kauai	NA	NA	No	-159.614975	22.150253	no
C-0609	No Nematode	Kauai	NA	NA	No	-159.664436	22.121864	no
C-0611	No Nematode	Kauai	NA	NA	No	-159.6643	22.121825	no
C-0612	No Nematode	Kauai	NA	NA	No	-159.664294	22.121761	no
C-0613	No Nematode	Kauai	NA	NA	No	-159.664458	22.121858	no
C-0615	No Nematode	Kauai	NA	NA	No	-159.664447	22.121931	no
C-0623	No Nematode	Molokai	NA	NA	No	-157.005031	21.176075	no
C-0625	No Nematode	Molokai	NA	NA	No	-157.006187	21.175444	no
C-0628	No Nematode	Molokai	NA	NA	No	-157.008131	21.175572	no
C-0631	No Nematode	Molokai	NA	NA	No	-157.008339	21.175453	no
C-0633	No Nematode	Molokai	NA	NA	No	-157.008131	21.175783	no
C-0642	No Nematode	Molokai	NA	NA	No	-157.0050491	21.17607655	no
C-0643	No Nematode	Molokai	NA	NA	No	-157.006269	21.175278	no
C-0654	No Nematode	Kauai	NA	NA	No	-159.660444	22.131578	no
C-0662	No Nematode	Kauai	NA	NA	No	-159.653297	22.142342	no
C-0665	No Nematode	Kauai	NA	NA	No	-159.655708	22.143836	no
C-0668	No Nematode	Kauai	NA	NA	No	-159.642553	22.129539	no
C-0669	No Nematode	Kauai	NA	NA	No	-159.642214	22.127189	no
C-0671	No Nematode	Kauai	NA	NA	No	-159.660194	22.130222	no
C-0673	No Nematode	Kauai	NA	NA	No	-159.661997	22.133714	no
C-0681	No Nematode	Kauai	NA	NA	No	-159.654969	22.124422	no
C-0684	No Nematode	Kauai	NA	NA	No	-159.655489	22.123967	no
C-0687	No Nematode	Kauai	NA	NA	No	-159.660297	22.131508	no
C-0692	No Nematode	Kauai	NA	NA	No	-159.66055	22.132619	no
C-0702	No Nematode	Kauai	NA	NA	No	-159.4175235	22.07134528	no
C-0708	No Nematode	Kauai	NA	NA	No	-159.66034204987838	22.131327595030427	no
C-0710	No Nematode	Kauai	NA	NA	No	-159.680144	22.118	no
C-0714	No Nematode	Kauai	NA	NA	No	-159.672739	22.110753	no
C-0716	No Nematode	Kauai	NA	NA	No	-159.672825	22.108214	no
C-0717	No Nematode	Kauai	NA	NA	No	-159.37909200000001	22.034486	no
C-0719	No Nematode	Kauai	NA	NA	No	-159.414567	22.070156	no
C-0722	No Nematode	Kauai	NA	NA	No	-159.660131	22.129594	no
C-0726	No Nematode	Kauai	NA	NA	No	-159.660228	22.130075	no
C-0729	No Nematode	Kauai	NA	NA	No	-159.6599895	22.13086433	no
C-0731	No Nematode	Kauai	NA	NA	No	-159.660483	22.131542	no
C-0733	No Nematode	Kauai	NA	NA	?	-159.652086	22.142203	no
C-0737	No Nematode	Kauai	NA	NA	No	-159.6577078	22.13008264	no
C-0738	No Nematode	Kauai	NA	NA	No	-159.661331	22.133928	no
C-0741	No Nematode	Maui	NA	NA	No	-156.456639	20.748408	no
C-0744	No Nematode	Kauai	NA	NA	No	-159.660375	22.131606	no
C-0745	No Nematode	Kauai	NA	NA	No	-159.661314	22.133914	no
C-0746	No Nematode	Kauai	NA	NA	No	-159.661331	22.133928	no
C-0747	No Nematode	Kauai	NA	NA	No	-159.660375	22.131606	no
C-0748	No Nematode	Maui	NA	NA	No	-156.520253	20.878897	no
C-0749	No Nematode	Kauai	NA	NA	No	-159.362844	21.950061	no
C-0752	No Nematode	Kauai	NA	NA	No	-159.650511	22.125469	no
C-0754	No Nematode	Molokai	NA	NA	No	-157.005236	21.177097	no
C-0761	No Nematode	Molokai	NA	NA	No	-157.005053	21.176421	no
C-0763	No Nematode	Molokai	NA	NA	No	-157.004993	21.176005	no
C-0766	No Nematode	Molokai	NA	NA	No	-157.005419	21.177119	no
C-0767	No Nematode	Molokai	NA	NA	No	-157.005953	21.175352	no
C-0777	No Nematode	Molokai	NA	NA	No	-157.00555	21.176969	no
C-0783	No Nematode	Kauai	NA	NA	No	-159.425981	22.081678	no
C-0786	No Nematode	Kauai	NA	NA	No	-159.422986	22.078722	no
C-0797	No Nematode	Kauai	NA	NA	No	-159.434047	22.092725	no
C-0804	No Nematode	Kauai	NA	NA	No	-159.6456000000848	22.15066865001401	no
C-0805	No Nematode	Kauai	NA	NA	No	-159.6455322	22.1508447	no
C-0806	No Nematode	Kauai	NA	NA	No	-159.6464265	22.15129598	no
C-0807	No Nematode	Kauai	NA	NA	No	-159.646475	22.151308	no
C-0809	No Nematode	Kauai	NA	NA	No	-159.641378	22.149061	no
C-0813	No Nematode	Kauai	NA	NA	No	-159.6427291	22.15087345	no
C-0815	No Nematode	Kauai	NA	NA	No	-159.641389	22.149119	no
C-0816	No Nematode	Kauai	NA	NA	No	-159.6409768	22.1485596	no
C-0818	No Nematode	Kauai	NA	NA	No	-159.641425	22.14915	no
C-0820	No Nematode	Kauai	NA	NA	No	-159.641375	22.149092	no
C-0821	No Nematode	Kauai	NA	NA	No	-159.641369	22.149078	no
C-0822	No Nematode	Kauai	NA	NA	No	-159.639882	22.146019	no
C-0823	No Nematode	Kauai	NA	NA	No	-159.6398939	22.1462255	no
C-0824	No Nematode	Kauai	NA	NA	No	-159.6456678	22.1504926	no
C-0825	No Nematode	Kauai	NA	NA	No	-159.6399157	22.1460336	no
C-0827	No Nematode	Kauai	NA	NA	No	-159.6404962	22.1433561	no
C-0828	No Nematode	Kauai	NA	NA	No	-159.640122	22.145192	no
C-0830	No Nematode	Kauai	NA	NA	No	-159.660553	22.132792	no
C-0834	No Nematode	Kauai	NA	NA	No	-159.651239	22.141631	no
C-0835	No Nematode	Kauai	NA	NA	No	-159.651753	22.141906	no
C-0836	No Nematode	Kauai	NA	NA	No	-159.652772	22.142044	no
C-0839	No Nematode	Kauai	NA	NA	No	-159.654475	22.143275	no
C-0842	No Nematode	Kauai	NA	NA	No	-159.391428	22.103764	no
C-0843	No Nematode	Kauai	NA	NA	No	-159.475747	22.198947	no
C-0844	No Nematode	Maui	NA	NA	No	-156.335756	20.670061	no
C-0848	No Nematode	Maui	NA	NA	No	-156.336625	20.670475	no
C-0850	No Nematode	Kauai	NA	NA	No	-159.390117	22.103872	no
C-0862	No Nematode	Kauai	NA	NA	No	-159.388972	22.1041	no
C-0863	No Nematode	Kauai	NA	NA	No	-159.47795	22.195639	no
C-0867	No Nematode	Kauai	NA	NA	No	-159.664547	22.134336	no
C-0871	No Nematode	Kauai	NA	NA	No	-159.666558	22.1353	no
C-0873	No Nematode	Maui	NA	NA	No	-156.545958	20.880364	no
C-0881	No Nematode	Molokai	NA	NA	No	-156.974289	21.139542	no
C-0882	No Nematode	Kauai	NA	NA	No	-159.473528	22.2018	no
C-0885	No Nematode	Molokai	NA	NA	No	-157.048623	21.165624	no
C-0886	No Nematode	Kauai	NA	NA	No	-159.473622	22.201636	no
C-0887	No Nematode	Kauai	NA	NA	No	-159.357194	22.046644	no
C-0893	No Nematode	Molokai	NA	NA	No	-157.048985	21.166405	no
C-0894	No Nematode	Kauai	NA	NA	No	-159.475361	22.199061	no
C-0895	No Nematode	Kauai	NA	NA	No	-159.360792	22.04295	no
C-0899	No Nematode	Maui	NA	NA	No	-156.331972	20.676633	no
C-0902	No Nematode	Kauai	NA	NA	No	-159.391669	22.086656	no
C-0904	No Nematode	Maui	NA	NA	No	-156.0758536	20.79521364	no
C-0915	No Nematode	Kauai	NA	NA	No	-159.478189	22.194933	no
C-0918	No Nematode	Kauai	NA	NA	No	-159.392233	22.087308	no
C-0924	No Nematode	Kauai	NA	NA	No	-159.478072	22.195114	no
C-0927	No Nematode	Kauai	NA	NA	No	-159.478622	22.194375	no
C-0928	No Nematode	Kauai	NA	NA	No	-159.477989	22.195386	no
C-0934	No Nematode	Kauai	NA	NA	No	-159.389825	22.085567	no
C-0938	No Nematode	Kauai	NA	NA	No	-159.389706	22.085575	no
C-0941	No Nematode	Kauai	NA	NA	No	-159.385944	22.084078	no
C-0943	No Nematode	Maui	NA	NA	No	-156.186294	20.874647	no
C-0951	No Nematode	Maui	NA	NA	No	-156.186331	20.874606	no
C-0953	No Nematode	Kauai	NA	NA	No	-159.388061	22.085408	no
C-0955	No Nematode	Maui	NA	NA	No	-156.186486	20.874619	no
C-0961	No Nematode	Kauai	NA	NA	No	-159.6600271	22.1308186	no
C-0962	No Nematode	Kauai	NA	NA	No	-159.660159	22.129733	no
C-0963	No Nematode	Kauai	NA	NA	No	-159.391692	22.086778	no
C-0965	No Nematode	Kauai	NA	NA	No	-159.660442	22.131499	no
C-0967	No Nematode	Kauai	NA	NA	No	-159.387828	22.085392	no
C-0968	No Nematode	Kauai	NA	NA	No	-159.478881	22.193453	no
C-0969	No Nematode	Kauai	NA	NA	No	-159.660256	22.131234	no
C-0970	No Nematode	Kauai	NA	NA	No	-159.660546	22.131623	no
C-0972	No Nematode	Kauai	NA	NA	No	-159.478961	22.193228	no
C-0974	No Nematode	Kauai	NA	NA	No	-159.678803	22.117714	no
C-0975	No Nematode	Kauai	NA	NA	No	-159.363089	21.950083	no
C-0977	No Nematode	Kauai	NA	NA	No	-159.6604194	22.1315326	no
C-0978	No Nematode	Kauai	NA	NA	No	-159.660501	22.131663	no
C-0979	No Nematode	Kauai	NA	NA	No	-159.665856	22.12015	no
C-0981	No Nematode	Kauai	NA	NA	No	-159.660422	22.131536	no
C-0984	No Nematode	Kauai	NA	NA	No	-159.478858	22.192736	no
C-0985	No Nematode	Kauai	NA	NA	No	-159.686211	22.119683	no
C-0987	No Nematode	Kauai	NA	NA	No	-159.664458	22.121981	no
C-0988	No Nematode	Kauai	NA	NA	No	-159.478753	22.192642	no
C-0992	No Nematode	Kauai	NA	NA	No	-159.478975	22.192453	no
C-0993	No Nematode	Kauai	NA	NA	No	-159.690811	22.121783	no
C-0997	No Nematode	Kauai	NA	NA	No	-159.681535	22.11847836	no
C-0999	No Nematode	Kauai	NA	NA	No	-159.668039	22.117697	no
C-1001	No Nematode	Kauai	NA	NA	No	-159.68245	22.119092	no
C-1003	No Nematode	Kauai	NA	NA	No	-159.664392	22.121858	no
C-1005	No Nematode	Kauai	NA	NA	No	-159.660421	22.131521	no
C-1006	No Nematode	Kauai	NA	NA	?	-159.387586	22.085186	no
C-1007	No Nematode	Kauai	NA	NA	No	-159.664392	22.121836	no
C-1009	No Nematode	Kauai	NA	NA	No	-159.686536	22.119928	no
C-1013	No Nematode	Kauai	NA	NA	No	-159.657517	22.130244	no
C-1014	No Nematode	Kauai	NA	NA	No	-159.392933	22.088497	no
C-1015	No Nematode	Kauai	NA	NA	No	-159.664339	22.121783	no
C-1016	No Nematode	Kauai	NA	NA	No	-159.478614	22.194364	no
C-1017	No Nematode	Kauai	NA	NA	No	-159.672346	22.114223	no
C-1021	No Nematode	Kauai	NA	NA	No	-159.426456	22.088514	no
C-1023	No Nematode	Kauai	NA	NA	No	-159.427797	22.089064	no
C-1025	No Nematode	Kauai	NA	NA	No	-159.427222	22.085683	no
C-1036	No Nematode	Kauai	NA	NA	No	-159.42975	22.090053	no
C-1038	No Nematode	Kauai	NA	NA	No	-159.431461	22.092114	no
C-1039	No Nematode	Kauai	NA	NA	No	-159.426042	22.081508	no
C-1046	No Nematode	Kauai	NA	NA	No	-159.389544	22.103917	no
C-1050	No Nematode	Kauai	NA	NA	No	-159.391561	22.103692	no
C-1051	No Nematode	Kauai	NA	NA	No	-159.392489	22.103719	no
C-1052	No Nematode	Kauai	NA	NA	No	-159.392625	22.103706	no
C-1054	No Nematode	Kauai	NA	NA	No	-159.392614	22.103689	no
C-1055	No Nematode	Maui	NA	NA	No	-156.522503	20.878544	no
C-1057	No Nematode	Molokai	NA	NA	No	-156.998987	21.140844	no
C-1058	No Nematode	Molokai	NA	NA	No	-156.965894	21.138089	no
C-1060	No Nematode	Molokai	NA	NA	No	-156.962525	21.138872	no
C-1063	No Nematode	Kauai	NA	NA	?	-159.66048349997737	22.131572000011897	no
C-1064	No Nematode	Kauai	NA	NA	No	-159.6604140000007	22.131548500000196	no
C-1068	No Nematode	Kauai	NA	NA	No	-159.417522	22.071372	no
C-1077	No Nematode	Kauai	NA	NA	No	-159.41538145000342	22.07341009000214	no
C-1080	No Nematode	Kauai	NA	NA	No	-159.478172	22.194939	no
C-1081	No Nematode	Kauai	NA	NA	No	-159.478722	22.194144	no
C-1082	No Nematode	Kauai	NA	NA	No	-159.478747	22.193561	no
C-1085	No Nematode	Kauai	NA	NA	No	-159.479322	22.191625	no
C-1088	No Nematode	Kauai	NA	NA	No	-159.480736	22.189136	no
C-1090	No Nematode	Kauai	NA	NA	No	-159.480417	22.188197	no
C-1092	No Nematode	Kauai	NA	NA	No	-159.478044	22.195117	no
C-1093	No Nematode	Kauai	NA	NA	No	-159.480406	22.190422	no
C-1097	No Nematode	Kauai	NA	NA	No	-159.480758	22.189136	no
C-1099	No Nematode	Maui	NA	NA	No	-156.508417	20.937403	no
C-1101	No Nematode	Kauai	NA	NA	No	-159.480739	22.189097	no
C-1102	No Nematode	Maui	NA	NA	No	-156.50815	20.93695	no
C-1103	No Nematode	Maui	NA	NA	No	-156.546286	20.880644	no
C-1105	No Nematode	Kauai	NA	NA	No	-159.480689	22.188819	no
C-1106	No Nematode	Maui	NA	NA	No	-156.546769	20.880222	no
C-1107	No Nematode	Maui	NA	NA	No	-156.546783	20.880544	no
C-1109	No Nematode	Kauai	NA	NA	No	-159.480447	22.188075	no
C-1111	No Nematode	Maui	NA	NA	No	-156.520236	20.878997	no
C-1112	No Nematode	Maui	NA	NA	No	-156.330753	20.676911	no
C-1113	No Nematode	Kauai	NA	NA	No	-159.480094	22.187639	no
C-1116	No Nematode	Maui	NA	NA	No	-156.504575	20.932556	no
C-1117	No Nematode	Kauai	NA	NA	No	-159.480006	22.187006	no
C-1123	No Nematode	Maui	NA	NA	No	-156.536397	20.949378	no
C-1127	No Nematode	Maui	NA	NA	No	-156.533403	20.951906	no
C-1140	No Nematode	Maui	NA	NA	No	-156.535316	20.949421	no
C-1146	No Nematode	Maui	NA	NA	No	-156.339489	20.6705	no
C-1148	No Nematode	Kauai	NA	NA	No	-159.657161	22.129439	no
C-1162	No Nematode	Maui	NA	NA	No	-156.508297	20.937681	no
C-1163	No Nematode	Kauai	NA	NA	No	-159.655667	22.124003	no
C-1170	No Nematode	Maui	NA	NA	No	-156.339903	20.668544	no
C-1174	No Nematode	Maui	NA	NA	No	-156.339594	20.669472	no
C-1177	No Nematode	Maui	NA	NA	No	-156.336881	20.670222	no
C-1178	No Nematode	Maui	NA	NA	No	-156.339094	20.669761	no
C-1181	No Nematode	Maui	NA	NA	No	-156.5073	20.935947	no
C-1183	No Nematode	Kauai	NA	NA	No	-159.656956	22.122867	no
C-1194	No Nematode	Kauai	NA	NA	No	-159.655092	22.124472	no
C-1198	No Nematode	Kauai	NA	NA	No	-159.654392	22.124408	no
C-1199	No Nematode	Kauai	NA	NA	No	-159.651347	22.125006	no
C-1201	No Nematode	Maui	NA	NA	No	-156.517419	20.880957	no
C-1207	No Nematode	Maui	NA	NA	No	-156.523449	20.878187	no
C-1210	No Nematode	Maui	NA	NA	No	-156.150537	20.854776	no
C-1213	No Nematode	Maui	NA	NA	No	-156.150537	20.854776	no
C-1227	No Nematode	Maui	NA	NA	No	-156.546598	20.880161	no
C-1233	No Nematode	Maui	NA	NA	No	-156.150537	20.854776	no
C-1237	No Nematode	Maui	NA	NA	No	-156.150537	20.854776	no
C-1243	No Nematode	Maui	NA	NA	No	-156.518838	20.880083	no
C-1247	No Nematode	Maui	NA	NA	No	-156.51959	20.879351	no
C-1249	No Nematode	Maui	NA	NA	No	-156.150537	20.854776	no
C-1250	No Nematode	Maui	NA	NA	No	-156.521069	20.878714	no
C-1261	No Nematode	Maui	NA	NA	No	-156.315775	20.691389	no
C-1262	No Nematode	Maui	NA	NA	No	-156.304325	20.723322	no
C-1264	No Nematode	Maui	NA	NA	No	-155.993553	20.762969	no
C-1272	No Nematode	Maui	NA	NA	No	-156.304358	20.723333	no
C-1276	No Nematode	Maui	NA	NA	No	-156.304311	20.723239	no
C-1286	No Nematode	Kauai	NA	NA	No	-159.674411	22.09445	no
C-1287	No Nematode	Kauai	NA	NA	No	-159.657908	22.130728	no
C-1293	No Nematode	Kauai	NA	NA	?	-159.658356	22.129211	no
C-1296	No Nematode	Kauai	NA	NA	No	-159.658353	22.129211	no
C-1297	No Nematode	Kauai	NA	NA	No	-159.6715	22.112164	no
C-1299	No Nematode	Kauai	NA	NA	No	-159.656714	22.122711	no
C-1301	No Nematode	Kauai	NA	NA	No	-159.656647	22.123103	no
C-1302	No Nematode	Kauai	NA	NA	No	-159.656094	22.123753	no
C-1306	No Nematode	Kauai	NA	NA	No	-159.656128	22.123775	no
C-1313	No Nematode	Maui	NA	NA	No	-156.230189	20.743919000000002	no
C-1315	No Nematode	Maui	NA	NA	No	-156.230058	20.744297	no
C-1316	No Nematode	Maui	NA	NA	No	-156.237149	20.767886	no
C-1322	No Nematode	Maui	NA	NA	No	-156.334383	20.682681	no
C-1337	No Nematode	Maui	NA	NA	No	-156.337742	20.676692	no
C-1341	No Nematode	Maui	NA	NA	No	-156.337539	20.676989	no
C-1348	No Nematode	Maui	NA	NA	No	-156.456922	20.747703	no
C-1349	No Nematode	Maui	NA	NA	No	-156.337517	20.6776	no
C-1352	No Nematode	Maui	NA	NA	No	-156.456806	20.748169	no
C-1354	No Nematode	Molokai	NA	NA	No	-156.962378	21.138883	no
C-1356	No Nematode	Maui	NA	NA	No	-156.456394	20.748117	no
C-1366	No Nematode	Molokai	NA	NA	No	-156.965969	21.137958	no
C-1370	No Nematode	Molokai	NA	NA	No	-156.965861	21.138067	no
C-1374	No Nematode	Molokai	NA	NA	No	-156.965911	21.138125	no
C-1377	No Nematode	Maui	NA	NA	No	-156.333222	20.683336	no
C-1379	No Nematode	Maui	NA	NA	No	-156.140148	20.840421	no
C-1382	No Nematode	Maui	NA	NA	No	-156.043906	20.661569	no
C-1389	No Nematode	Maui	NA	NA	No	-156.045222	20.662572	no
C-1396	No Nematode	Maui	NA	NA	No	-156.049072	20.66505	no
C-1397	No Nematode	Maui	NA	NA	No	-156.049072	20.66505	no
C-1458	No Nematode	Maui	NA	NA	No	-156.357067	20.704694	no
C-1459	No Nematode	Maui	NA	NA	No	-156.323365	20.7422012	no
C-1460	No Nematode	Maui	NA	NA	No	-156.2358327	20.767559	no
C-1461	No Nematode	Maui	NA	NA	No	-156.235875	20.767587	no
C-1462	No Nematode	Maui	NA	NA	No	-156.2366844	20.7685484	no
C-1463	No Nematode	Maui	NA	NA	No	-156.235855	20.767618	no
C-1469	No Nematode	Maui	NA	NA	No	-156.323875	20.741484	no
C-1471	No Nematode	Maui	NA	NA	No	-156.237148	20.767893	no
C-1473	No Nematode	Maui	NA	NA	No	-156.32388	20.741491	no
C-1481	No Nematode	Maui	NA	NA	No	-156.32344	20.741842	no
C-1482	No Nematode	Maui	NA	NA	No	-156.323365	20.7422012	no
C-1485	No Nematode	Maui	NA	NA	No	-156.278061	20.805685	no
C-1487	No Nematode	Maui	NA	NA	No	-156.278061	20.805685	no
C-1491	No Nematode	Maui	NA	NA	No	-156.278061	20.805685	no
C-1492	No Nematode	Maui	NA	NA	No	-156.278061	20.805685	no
C-1493	No Nematode	Maui	NA	NA	No	-156.324124	20.741846	no
C-1494	No Nematode	Maui	NA	NA	No	-156.324147	20.74176	no
C-1495	No Nematode	Maui	NA	NA	?	-156.278061	20.805685	no
C-1496	No Nematode	Maui	NA	NA	No	-156.324562	20.742449	no
C-1498	No Nematode	Maui	NA	NA	No	-156.323764	20.741914	no
C-1501	No Nematode	Maui	NA	NA	No	-156.323909	20.741875	no
C-1502	No Nematode	Maui	NA	NA	No	-156.323491	20.741982	no
C-1504	No Nematode	Maui	NA	NA	No	-156.323481	20.741899	no
C-1505	No Nematode	Maui	NA	NA	No	-156.323365	20.742201	no
C-1518	No Nematode	Maui	NA	NA	No	-156.049033	20.66489	no
C-1525	No Nematode	Maui	NA	NA	No	-156.041417	20.662653	no
C-1526	No Nematode	Maui	NA	NA	No	-156.043808	20.663194	no
C-1528	No Nematode	Maui	NA	NA	No	-156.02851	20.684114	no
C-1531	No Nematode	Maui	NA	NA	No	-155.997039	20.70297	no
C-1532	No Nematode	Maui	NA	NA	No	-156.043056	20.661989	no
C-2523	No Nematode	Maui	NA	NA	No	-156.140111	20.840114	no
C-2529	No Nematode	Maui	NA	NA	No	-156.056753	20.673808	no
C-2551	No Nematode	Maui	NA	NA	?	-156.310106	20.887892	no
C-2555	No Nematode	Maui	NA	NA	No	-156.456622	20.74805	no
C-2559	No Nematode	Maui	NA	NA	No	-156.456872	20.747686	no
C-2565	No Nematode	Maui	NA	NA	No	-156.055758	20.671164	no
C-2577	No Nematode	Maui	NA	NA	No	-156.056261	20.672364	no
C-2586	No Nematode	Maui	NA	NA	No	-156.057039	20.675631	no
C-2596	No Nematode	Maui	NA	NA	No	-156.04902	20.664928	no
C-2598	No Nematode	Maui	NA	NA	No	-156.04903500000034	20.664924500000645	no
C-2599	No Nematode	Maui	NA	NA	No	-156.0490165	20.664919000000207	no
C-2602	No Nematode	Maui	NA	NA	No	-156.049072	20.664844	no
C-2605	No Nematode	Maui	NA	NA	No	-156.049008	20.664903	no
C-2608	No Nematode	Maui	NA	NA	No	-156.12543	20.816459	no
C-2611	No Nematode	Maui	NA	NA	No	-156.125361	20.816852	no
C-2618	No Nematode	Maui	NA	NA	No	-156.137214	20.821498	no
C-2624	No Nematode	Maui	NA	NA	No	-156.138509	20.820161	no
C-2626	No Nematode	Maui	NA	NA	No	-156.354158	20.706461	no
C-2629	No Nematode	Maui	NA	NA	No	-156.125701	20.81723	no
C-2643	No Nematode	Kauai	NA	NA	No	-159.658711	22.049578	no
C-2646	No Nematode	Kauai	NA	NA	No	-159.667792	22.117742	no
C-2649	No Nematode	Kauai	NA	NA	No	-159.664528	22.121969	no
C-2653	No Nematode	Kauai	NA	NA	No	-159.664392	22.121914	no
C-2654	No Nematode	Kauai	NA	NA	No	-159.664381	22.121947	no
C-2655	No Nematode	Kauai	NA	NA	No	-159.664475	22.121864	no
C-2656	No Nematode	Kauai	NA	NA	No	-159.664464	22.121872	no
C-2657	No Nematode	Kauai	NA	NA	No	-159.664517	22.121883	no
C-2661	No Nematode	Kauai	NA	NA	No	-159.664453	22.121869	no
C-2664	No Nematode	Kauai	NA	NA	No	-159.660008	22.129483	no
C-2665	No Nematode	Kauai	NA	NA	No	-159.660083	22.129583	no
C-2666	No Nematode	Kauai	NA	NA	No	-159.66025	22.1313	no
C-2667	No Nematode	Kauai	NA	NA	?	-159.660231	22.130006	no
C-2674	No Nematode	Big Island	NA	NA	No	-155.224714	19.387214	no
C-2675	No Nematode	Big Island	NA	NA	No	-155.227156	19.391367	no
C-2678	No Nematode	Big Island	NA	NA	No	-155.218467	19.37735	no
C-2683	No Nematode	Big Island	NA	NA	No	-155.228522	19.392933	no
C-2687	No Nematode	Big Island	NA	NA	No	-155.227161	19.391469	no
C-2688	No Nematode	Big Island	NA	NA	No	-155.140633	19.902667	no
C-2689	No Nematode	Big Island	NA	NA	No	-155.21805	19.369681	no
C-2691	No Nematode	Big Island	NA	NA	No	-155.229969	19.395539	no
C-2692	No Nematode	Big Island	NA	NA	No	-155.142708	19.900408	no
C-2693	No Nematode	Big Island	NA	NA	No	-155.218414	19.368681	no
C-2699	No Nematode	Big Island	NA	NA	No	-155.229744	19.395439	no
C-2701	No Nematode	Kauai	NA	NA	No	-159.659994	22.129581	no
C-2704	No Nematode	Big Island	NA	NA	No	-155.870822	19.275356	no
C-2705	No Nematode	Kauai	NA	NA	No	-159.660047	22.129872	no
C-2707	No Nematode	Kauai	NA	NA	No	-159.660478	22.132817	no
C-2709	No Nematode	Kauai	NA	NA	No	-159.660142	22.13	no
C-2710	No Nematode	Kauai	NA	NA	No	-159.660092	22.131092	no
C-2711	No Nematode	Kauai	NA	NA	No	-159.652492	22.124922	no
C-2713	No Nematode	Kauai	NA	NA	?	-159.660364	22.130228	no
C-2715	No Nematode	Kauai	NA	NA	No	-159.651942	22.124786	no
C-2716	No Nematode	Big Island	NA	NA	No	-155.975272	19.688011	no
C-2717	No Nematode	Kauai	NA	NA	No	-159.660333	22.130353	no
C-2721	No Nematode	Kauai	NA	NA	No	-159.660094	22.13075	no
C-2725	No Nematode	Kauai	NA	NA	No	-159.660231	22.131736	no
C-2726	No Nematode	Kauai	NA	NA	No	-159.653436	22.124356	no
C-2730	No Nematode	Kauai	NA	NA	No	-159.655908	22.123933	no
C-2733	No Nematode	Kauai	NA	NA	No	-159.660589	22.132858	no
C-2736	No Nematode	Big Island	NA	NA	No	-155.870792	19.275317	no
C-2740	No Nematode	Big Island	NA	NA	No	-155.870861	19.275261	no
C-2741	No Nematode	Kauai	NA	NA	No	-159.660072	22.132433	no
C-2743	No Nematode	Big Island	NA	NA	No	-155.94903299999999	19.718978	no
C-2746	No Nematode	Kauai	NA	NA	No	-159.660167	22.130953	no
C-2748	No Nematode	Big Island	NA	NA	No	-155.948747	19.718525	no
C-2749	No Nematode	Kauai	NA	NA	No	-159.650219	22.125181	no
C-2750	No Nematode	Kauai	NA	NA	No	-159.66055	22.131522	no
C-2751	No Nematode	Big Island	NA	NA	No	-155.825267	19.109456	no
C-2754	No Nematode	Kauai	NA	NA	No	-159.660269	22.131761	no
C-2755	No Nematode	Big Island	NA	NA	No	-155.873036	19.327411	no
C-2764	No Nematode	Big Island	NA	NA	No	-155.444733	20.040961	no
C-2788	No Nematode	Big Island	NA	NA	No	-155.6154	19.075967	no
C-2792	No Nematode	Big Island	NA	NA	No	-155.236992	19.452044	no
C-2793	No Nematode	Big Island	NA	NA	No	-155.237997	19.453811	no
C-2808	No Nematode	Big Island	NA	NA	No	-155.221286	19.425244	no
C-2809	No Nematode	Big Island	NA	NA	No	-155.222586	19.424083	no
C-2810	No Nematode	Big Island	NA	NA	No	-155.222286	19.424414	no
C-2814	No Nematode	Big Island	NA	NA	No	-155.221625	19.424939	no
C-2816	No Nematode	Big Island	NA	NA	No	-155.222478	19.423864	no
C-2818	No Nematode	Big Island	NA	NA	No	-155.222547	19.423881	no
C-2820	No Nematode	Big Island	NA	NA	No	-155.222485	19.42388613	no
C-2823	No Nematode	Big Island	NA	NA	?	-155.117447	19.715881	no
C-2829	No Nematode	Big Island	NA	NA	No	-155.142611	19.900392	no
C-2833	No Nematode	Big Island	NA	NA	No	-155.068106	19.589261	no
C-2847	No Nematode	Big Island	NA	NA	No	-155.068347	19.589739	no
C-2851	No Nematode	Big Island	NA	NA	No	-155.109236	19.718822	no
C-2854	No Nematode	Big Island	NA	NA	No	-155.143003	19.900294	no
C-2860	No Nematode	Big Island	NA	NA	No	-155.441617	20.039911	no
C-2862	No Nematode	Big Island	NA	NA	No	-155.117511	19.715922	no
C-2863	No Nematode	Big Island	NA	NA	No	-155.303825	19.439186	no
C-2864	No Nematode	Big Island	NA	NA	No	-155.222447	19.423889	no
C-2867	No Nematode	Big Island	NA	NA	No	-155.238258	19.413433	no
C-2869	No Nematode	Big Island	NA	NA	No	-155.3725828	19.67078586	no
C-2877	No Nematode	Big Island	NA	NA	No	-155.372578	19.670792	no
C-2878	No Nematode	Big Island	NA	NA	?	-155.143011	19.900306	no
C-2897	No Nematode	Big Island	NA	NA	No	-155.442425	20.040247	no
C-2899	No Nematode	Big Island	NA	NA	No	-155.44375	20.040767	no
C-2901	No Nematode	Big Island	NA	NA	No	-155.444044	20.040517	no
C-2917	No Nematode	Big Island	NA	NA	No	-155.821219	19.113881	no
C-2923	No Nematode	Big Island	NA	NA	No	-155.785489	19.122489	no
C-2935	No Nematode	Big Island	NA	NA	No	-155.461233	19.223325	no
C-2940	No Nematode	Big Island	NA	NA	No	-155.327672	19.407581	no
C-2946	No Nematode	Big Island	NA	NA	?	-155.233497	19.402642	no
C-2974	No Nematode	Big Island	NA	NA	No	-155.94863899999999	19.720131	no
C-2980	No Nematode	Big Island	NA	NA	No	-154.903608	19.482775	no
C-2981	No Nematode	Big Island	NA	NA	?	-155.335861	19.440814	no
C-2982	No Nematode	Big Island	NA	NA	No	-155.239294	19.426131	no
C-2986	No Nematode	Big Island	NA	NA	?	-155.067194	19.589728	no
C-2993	No Nematode	Big Island	NA	NA	No	-155.237358	19.453867	no
C-2995	No Nematode	Big Island	NA	NA	No	-155.622392	19.086536	no
C-2996	No Nematode	Big Island	NA	NA	No	-155.241564	19.453197	no
C-3000	No Nematode	Big Island	NA	NA	No	-155.241553	19.453186	no
C-3001	No Nematode	Big Island	NA	NA	No	-155.261067	19.431928	no
C-3002	No Nematode	Big Island	NA	NA	No	-155.262606	19.432472	no
C-3004	No Nematode	Big Island	NA	NA	No	-155.263519	19.432583	no
C-3016	No Nematode	Big Island	NA	NA	No	-155.303758	19.439225	no
C-3034	No Nematode	Big Island	NA	NA	No	-155.224617	19.356044	no
C-3038	No Nematode	Big Island	NA	NA	No	-155.224919	19.3542	no
C-3045	No Nematode	Big Island	NA	NA	No	-155.221994	19.424522	no
C-3047	No Nematode	Big Island	NA	NA	No	-155.222106	19.424492	no
C-3055	No Nematode	Big Island	NA	NA	No	-155.222453	19.423853	no
C-3064	No Nematode	Big Island	NA	NA	No	-155.237447	19.452986	no
C-3076	No Nematode	Big Island	NA	NA	No	-155.237864	19.453617	no
C-3079	No Nematode	Big Island	NA	NA	?	-155.439492	20.03985	no
C-3081	No Nematode	Big Island	NA	NA	No	-155.068783	19.590797	no
C-3089	No Nematode	Big Island	NA	NA	No	-155.222614	19.423964	no
C-3090	No Nematode	Big Island	NA	NA	No	-155.673528	20.020458	no
C-3092	No Nematode	Big Island	NA	NA	No	-155.237436	19.45295	no
C-3094	No Nematode	Big Island	NA	NA	No	-155.673572	20.020775	no
C-3121	No Nematode	Big Island	NA	NA	No	-155.469108	20.056967	no
C-3135	No Nematode	Big Island	NA	NA	No	-155.443494	20.032681	no
C-3137	No Nematode	Big Island	NA	NA	?	-155.438336	20.039019	no
C-3142	No Nematode	Big Island	NA	NA	?	-155.821778	19.11345	no
C-3157	No Nematode	Big Island	NA	NA	No	-155.948531	19.719325	no
C-3165	No Nematode	Big Island	NA	NA	?	-155.948583	19.719567	no
C-3181	No Nematode	Big Island	NA	NA	No	-155.443147	20.033072	no
C-3191	No Nematode	Big Island	NA	NA	No	-155.620433	19.092114	no
C-3192	No Nematode	Big Island	NA	NA	No	-155.239486	19.426133	no
C-3195	No Nematode	Big Island	NA	NA	No	-155.239256	19.426122	no
C-3210	No Nematode	Big Island	NA	NA	No	-155.620186	19.092894	no
C-3211	No Nematode	Big Island	NA	NA	No	-155.239625	19.426014	no
C-3214	No Nematode	Big Island	NA	NA	No	-155.620086	19.093275	no
C-3218	No Nematode	Big Island	NA	NA	No	-155.619961	19.093903	no
C-3220	No Nematode	Big Island	NA	NA	No	-155.196731	19.447106	no
C-3226	No Nematode	Big Island	NA	NA	No	-155.619678	19.094575	no
C-3235	No Nematode	Big Island	NA	NA	No	-155.239644	19.425783	no
C-3236	No Nematode	Big Island	NA	NA	No	-155.239097	19.426092	no
C-3241	No Nematode	Big Island	NA	NA	No	-155.819039	19.115258	no
C-3244	No Nematode	Big Island	NA	NA	No	-155.820169	19.114589	no
C-3257	No Nematode	Big Island	NA	NA	No	-155.820144	19.118011	no
C-3262	No Nematode	Big Island	NA	NA	No	-155.8205	19.114358	no
C-3263	No Nematode	Big Island	NA	NA	No	-155.948517	19.719289	no
C-3273	No Nematode	Big Island	NA	NA	No	-155.819556	19.120403	no
C-3279	No Nematode	Big Island	NA	NA	?	-155.821061	19.114033	no
C-3280	No Nematode	Big Island	NA	NA	No	-155.372706	19.670875	no
C-3283	No Nematode	Big Island	NA	NA	No	-155.820833	19.114308	no
C-3284	No Nematode	Big Island	NA	NA	No	-155.345672	19.672353	no
C-3285	No Nematode	Big Island	NA	NA	No	-155.820125	19.114697	no
C-3300	No Nematode	Big Island	NA	NA	No	-155.820806	19.114269	no
C-3308	No Nematode	Big Island	NA	NA	?	-155.441708	20.036875	no
C-3309	No Nematode	Big Island	NA	NA	No	-155.068675	19.727067	no
C-3310	No Nematode	Big Island	NA	NA	No	-154.901356	19.483486	no
C-3313	No Nematode	Big Island	NA	NA	No	-155.068289	19.726017	no
C-3349	No Nematode	Big Island	NA	NA	No	-154.902392	19.483347	no
C-3350	No Nematode	Big Island	NA	NA	No	-155.065183	19.728614	no
C-3356	No Nematode	Big Island	NA	NA	No	-155.162428	19.932167	no
C-3368	No Nematode	Big Island	NA	NA	No	-155.334642	19.442744	no
C-3380	No Nematode	Big Island	NA	NA	No	-155.620242	19.093208	no
C-3412	No Nematode	Big Island	NA	NA	No	-155.233531	19.429997	no
C-3417	No Nematode	Big Island	NA	NA	No	-154.902728	19.483178	no
C-3419	No Nematode	Big Island	NA	NA	No	-155.233625	19.429958	no
C-3489	No Nematode	Big Island	NA	NA	No	-155.09325	19.772678	no
C-3501	No Nematode	Big Island	NA	NA	No	-155.102489	19.811206	no
C-3510	No Nematode	Big Island	NA	NA	No	-155.217781	19.954828	no
C-3521	No Nematode	Big Island	NA	NA	No	-155.154472	19.921528	no
C-0008	Tracks only	Oahu	NA	NA	Tracks	-157.722289	21.307517	no
C-0014	Tracks only	Oahu	NA	NA	Tracks	-157.721019	21.311314	no
C-0027	Tracks only	Oahu	NA	NA	Tracks	-157.801125	21.333292	no
C-0036	Tracks only	Oahu	NA	NA	Tracks	-157.803325	21.381903	no
C-0056	Tracks only	Oahu	NA	NA	Tracks	-157.721964	21.308586	no
C-0059	Tracks only	Oahu	NA	NA	Tracks	-157.799636	21.336539	no
C-0070	Tracks only	Oahu	NA	NA	Tracks	-157.779636	21.362181	no
C-0071	Tracks only	Oahu	NA	NA	Tracks	-157.806342	21.351047	no
C-0075	Tracks only	Oahu	NA	NA	Tracks	-157.779928	21.364875	no
C-0088	Tracks only	Oahu	NA	NA	Tracks	-158.017142	21.503544	no
C-0112	Tracks only	Kauai	NA	NA	Tracks	-159.596392	22.203839	no
C-0114	Tracks only	Kauai	NA	NA	Tracks	-159.597381	22.206706	no
C-0122	Tracks only	Kauai	NA	NA	Tracks	-159.587122	22.217614	no
C-0124	Tracks only	Kauai	NA	NA	Tracks	-159.621222	22.151731	no
C-0129	Tracks only	Kauai	NA	NA	Tracks	-159.621469	22.151492	no
C-0143	Tracks only	Kauai	NA	NA	Tracks	-159.604683	22.148044	no
C-0149	Tracks only	Kauai	NA	NA	Tracks	-159.628208	22.148258	no
C-0152	Tracks only	Kauai	NA	NA	Tracks	-159.617267	22.147536	no
C-0154	Tracks only	Kauai	NA	NA	Tracks	-159.660394	22.131372	no
C-0162	Tracks only	Kauai	NA	NA	Tracks	-159.649164	22.141331	no
C-0164	Tracks only	Kauai	NA	NA	Tracks	-159.597819	22.156056	no
C-0165	Tracks only	Kauai	NA	NA	Tracks	-159.604289	22.148608	no
C-0170	Tracks only	Kauai	NA	NA	Tracks	-159.611217	22.146197	no
C-0181	Tracks only	Kauai	NA	NA	Tracks	-159.300636	22.117747	no
C-0191	Tracks only	Kauai	NA	NA	Tracks	-159.402975	22.201536	no
C-0199	Tracks only	Kauai	NA	NA	Tracks	-159.589703	22.214272	no
C-0207	Tracks only	Kauai	NA	NA	Tracks	-159.597194	22.207375	no
C-0229	Tracks only	Kauai	NA	NA	Tracks	-159.6421812	22.1499193	no
C-0235	Tracks only	Kauai	NA	NA	Tracks	-159.640969	22.133458	no
C-0259	Tracks only	Kauai	NA	NA	Tracks	-159.423044	22.078728	no
C-0268	Tracks only	Kauai	NA	NA	Tracks	-159.375603	22.100686	no
C-0269	Tracks only	Kauai	NA	NA	Tracks	-159.386672	22.102539	no
C-0274	Tracks only	Kauai	NA	NA	Tracks	-159.387669	22.103158	no
C-0296	Tracks only	Kauai	NA	NA	Tracks	-159.426014	22.081606	no
C-0307	Tracks only	Maui	NA	NA	Tracks	-156.535021	20.950026	no
C-0327	Tracks only	Maui	NA	NA	Tracks	-156.535331	20.949403	no
C-0336	Tracks only	Maui	NA	NA	Tracks	-156.335833	20.670575	no
C-0342	Tracks only	Maui	NA	NA	Tracks	-156.532844	20.952117	no
C-0347	Tracks only	Maui	NA	NA	Tracks	-156.536511	20.948803	no
C-0381	Tracks only	Maui	NA	NA	Tracks	-156.332556	20.6759	no
C-0384	Tracks only	Maui	NA	NA	Tracks	-156.097159	20.80732	no
C-0385	Tracks only	Maui	NA	NA	Tracks	-156.333278	20.674186	no
C-0388	Tracks only	Maui	NA	NA	Tracks	-156.097072	20.807294	no
C-0389	Tracks only	Maui	NA	NA	Tracks	-156.332317	20.672508	no
C-0393	Tracks only	Maui	NA	NA	Tracks	-156.333072	20.674875	no
C-0401	Tracks only	Maui	NA	NA	Tracks	-156.332306	20.676389	no
C-0404	Tracks only	Maui	NA	NA	Tracks	-156.095849	20.807562	no
C-0407	Tracks only	Maui	NA	NA	Tracks	-156.003034	20.779735	no
C-0417	Tracks only	Maui	NA	NA	Tracks	-156.332561	20.672228	no
C-0425	Tracks only	Kauai	NA	NA	Tracks	-159.421236	22.075144	no
C-0447	Tracks only	Kauai	NA	NA	Tracks	-159.415408	22.073392	no
C-0449	Tracks only	Kauai	NA	NA	Tracks	-159.414131	22.075181	no
C-0465	Tracks only	Kauai	NA	NA	Tracks	-159.656158	22.123408	no
C-0470	Tracks only	Kauai	NA	NA	Tracks	-159.655375	22.124456	no
C-0475	Tracks only	Kauai	NA	NA	Tracks	-159.616936	22.152792	no
C-0485	Tracks only	Kauai	NA	NA	Tracks	-159.64138	22.149054	no
C-0486	Tracks only	Kauai	NA	NA	Tracks	-159.641363	22.149121	no
C-0487	Tracks only	Kauai	NA	NA	Tracks	-159.641396	22.149134	no
C-0490	Tracks only	Kauai	NA	NA	Tracks	-159.641364	22.149101	no
C-0492	Tracks only	Kauai	NA	NA	Tracks	-159.641349	22.149104	no
C-0501	Tracks only	Kauai	NA	NA	Tracks	-159.617265	22.153389	no
C-0509	Tracks only	Kauai	NA	NA	Tracks	-159.600203	22.152025	no
C-0522	Tracks only	Kauai	NA	NA	Tracks	-159.660422	22.131483	no
C-0563	Tracks only	Molokai	NA	NA	Tracks	-156.965661	21.138192	no
C-0564	Tracks only	Maui	NA	NA	Tracks	-156.179811	20.870576	no
C-0572	Tracks only	Kauai	NA	NA	Tracks	-159.6228463	22.15004209	no
C-0580	Tracks only	Kauai	NA	NA	Tracks	-159.616136	22.151857	no
C-0589	Tracks only	Kauai	NA	NA	Tracks	-159.664386	22.121912	no
C-0592	Tracks only	Kauai	NA	NA	Tracks	-159.661536	22.134031	no
C-0606	Tracks only	Kauai	NA	NA	Tracks	-159.670014	22.086264	no
C-0610	Tracks only	Kauai	NA	NA	Tracks	-159.6172	22.153261	no
C-0614	Tracks only	Kauai	NA	NA	Tracks	-159.664469	22.121839	no
C-0618	Tracks only	Kauai	NA	NA	Tracks	-159.7087518	22.12394834	no
C-0621	Tracks only	Maui	NA	NA	Tracks	-156.515413	20.88202	no
C-0629	Tracks only	Molokai	NA	NA	Tracks	-157.008278	21.175608	no
C-0630	Tracks only	Molokai	NA	NA	Tracks	-157.008285	21.175636	no
C-0634	Tracks only	Molokai	NA	NA	Tracks	-157.008278	21.175678	no
C-0635	Tracks only	Molokai	NA	NA	Tracks	-157.008403	21.175631	no
C-0638	Tracks only	Molokai	NA	NA	Tracks	-157.008275	21.175514	no
C-0641	Tracks only	Molokai	NA	NA	Tracks	-157.008225	21.175617	no
C-0644	Tracks only	Molokai	NA	NA	Tracks	-157.00505	21.176078	no
C-0646	Tracks only	Molokai	NA	NA	Tracks	-156.96595	21.137981	no
C-0649	Tracks only	Kauai	NA	NA	Tracks	-159.645311	22.128939	no
C-0655	Tracks only	Kauai	NA	NA	Tracks	-159.660481	22.131611	no
C-0660	Tracks only	Kauai	NA	NA	Tracks	-159.660369	22.131403	no
C-0661	Tracks only	Kauai	NA	NA	Tracks	-159.652769	22.141961	no
C-0663	Tracks only	Kauai	NA	NA	Tracks	-159.653425	22.142539	no
C-0664	Tracks only	Kauai	NA	NA	Tracks	-159.654581	22.143375	no
C-0667	Tracks only	Kauai	NA	NA	Tracks	-159.649608	22.127789	no
C-0672	Tracks only	Kauai	NA	NA	Tracks	-159.66035	22.130597	no
C-0685	Tracks only	Kauai	NA	NA	Tracks	-159.654592	22.1244	no
C-0689	Tracks only	Kauai	NA	NA	Tracks	-159.660439	22.131511	no
C-0690	Tracks only	Kauai	NA	NA	Tracks	-159.661711	22.133697	no
C-0691	Tracks only	Kauai	NA	NA	Tracks	-159.661194	22.133914	no
C-0693	Tracks only	Kauai	NA	NA	Tracks	-159.660094	22.131889	no
C-0700	Tracks only	Kauai	NA	NA	Tracks	-159.417442	22.071342	no
C-0701	Tracks only	Kauai	NA	NA	Tracks	-159.417475	22.071322	no
C-0718	Tracks only	Kauai	NA	NA	Tracks	-159.413875	22.069681	no
C-0723	Tracks only	Kauai	NA	NA	Tracks	-159.660239	22.131089	no
C-0724	Tracks only	Kauai	NA	NA	Tracks	-159.664794	22.039261	no
C-0728	Tracks only	Kauai	NA	NA	Tracks	-159.660453	22.131475	no
C-0732	Tracks only	Kauai	NA	NA	Tracks	-159.659644	22.129331	no
C-0734	Tracks only	Molokai	NA	NA	Tracks	-156.969036	21.138911	no
C-0735	Tracks only	Molokai	NA	NA	Tracks	-156.965903	21.138025	no
C-0740	Tracks only	Kauai	NA	NA	Tracks	-159.643672	22.136664	no
C-0751	Tracks only	Kauai	NA	NA	Tracks	-159.642153	22.127217	no
C-0755	Tracks only	Molokai	NA	NA	Tracks	-157.005463	21.177075	no
C-0757	Tracks only	Molokai	NA	NA	Tracks	-157.005458	21.177017	no
C-0768	Tracks only	Molokai	NA	NA	Tracks	-157.005388	21.177006	no
C-0773	Tracks only	Molokai	NA	NA	Tracks	-157.005392	21.175617	no
C-0795	Tracks only	Kauai	NA	NA	Tracks	-159.434636	22.092728	no
C-0808	Tracks only	Kauai	NA	NA	Tracks	-159.642197	22.150047	no
C-0811	Tracks only	Kauai	NA	NA	Tracks	-159.641369	22.149108	no
C-0814	Tracks only	Kauai	NA	NA	Tracks	-159.640092	22.147681	no
C-0819	Tracks only	Kauai	NA	NA	Tracks	-159.641372	22.149067	no
C-0826	Tracks only	Kauai	NA	NA	Tracks	-159.639708	22.147056	no
C-0845	Tracks only	Kauai	NA	NA	Tracks	-159.392014	22.104131	no
C-0856	Tracks only	Maui	NA	NA	Tracks	-156.333333	20.672456	no
C-0858	Tracks only	Kauai	NA	NA	Tracks	-159.3889	22.104111	no
C-0860	Tracks only	Maui	NA	NA	Tracks	-156.334956	20.672531	no
C-0869	Tracks only	Maui	NA	NA	Tracks	-156.5158585	20.881462	no
C-0940	Tracks only	Kauai	NA	NA	Tracks	-159.477658	22.197208	no
C-0944	Tracks only	Maui	NA	NA	Tracks	-156.332683	20.6734	no
C-0947	Tracks only	Maui	NA	NA	Tracks	-156.186233	20.874608	no
C-0952	Tracks only	Maui	NA	NA	Tracks	-156.332628	20.672069	no
C-0956	Tracks only	Maui	NA	NA	Tracks	-156.333225	20.673917	no
C-0960	Tracks only	Maui	NA	NA	Tracks	-156.332928	20.673633	no
C-1049	Tracks only	Kauai	NA	NA	Tracks	-159.390044	22.103925	no
C-1062	Tracks only	Molokai	NA	NA	Tracks	-156.96571	21.138285	no
C-1071	Tracks only	Kauai	NA	NA	Tracks	-159.417439	22.071211	no
C-1078	Tracks only	Kauai	NA	NA	Tracks	-159.41538145000342	22.07341009000214	no
C-1095	Tracks only	Maui	NA	NA	Tracks	-156.332514	20.676283	no
C-1096	Tracks only	Maui	NA	NA	Tracks	-156.332711	20.675267	no
C-1098	Tracks only	Maui	NA	NA	Tracks	-156.332614	20.67575	no
C-1100	Tracks only	Maui	NA	NA	Tracks	-156.331528	20.676867	no
C-1104	Tracks only	Maui	NA	NA	Tracks	-156.331294	20.676867	no
C-1118	Tracks only	Maui	NA	NA	Tracks	-156.536167	20.949358	no
C-1119	Tracks only	Maui	NA	NA	Tracks	-156.535508	20.949847	no
C-1120	Tracks only	Maui	NA	NA	Tracks	-156.535217	20.949489	no
C-1122	Tracks only	Maui	NA	NA	Tracks	-156.536928	20.949744	no
C-1124	Tracks only	Maui	NA	NA	Tracks	-156.5362	20.949294	no
C-1128	Tracks only	Maui	NA	NA	Tracks	-156.535369	20.949372	no
C-1131	Tracks only	Maui	NA	NA	Tracks	-156.535381	20.949378	no
C-1133	Tracks only	Maui	NA	NA	Tracks	-156.535339	20.949406	no
C-1137	Tracks only	Maui	NA	NA	Tracks	-156.535319	20.949419	no
C-1138	Tracks only	Maui	NA	NA	Tracks	-156.535317	20.949419	no
C-1145	Tracks only	Maui	NA	NA	Tracks	-156.536511	20.949757	no
C-1157	Tracks only	Maui	NA	NA	Tracks	-156.536335	20.949722	no
C-1158	Tracks only	Maui	NA	NA	Tracks	-156.340122	20.673144	no
C-1164	Tracks only	Maui	NA	NA	Tracks	-156.330817	20.684014	no
C-1165	Tracks only	Maui	NA	NA	Tracks	-156.536349	20.948754	no
C-1166	Tracks only	Maui	NA	NA	Tracks	-156.338853	20.668914	no
C-1168	Tracks only	Maui	NA	NA	Tracks	-156.329022	20.684544	no
C-1169	Tracks only	Maui	NA	NA	Tracks	-156.337261	20.669481	no
C-1176	Tracks only	Maui	NA	NA	Tracks	-156.329158	20.68225	no
C-1184	Tracks only	Maui	NA	NA	Tracks	-156.335286	20.682447	no
C-1187	Tracks only	Kauai	NA	NA	Tracks	-159.657136	22.122594	no
C-1188	Tracks only	Maui	NA	NA	Tracks	-156.337161	20.68125	no
C-1189	Tracks only	Maui	NA	NA	Tracks	-156.338747	20.669169	no
C-1196	Tracks only	Maui	NA	NA	Tracks	-156.237008	20.767694	no
C-1200	Tracks only	Maui	NA	NA	Tracks	-156.237116	20.767879	no
C-1205	Tracks only	Maui	NA	NA	Tracks	-156.134572	20.830723	no
C-1215	Tracks only	Maui	NA	NA	Tracks	-156.535322	20.949424	no
C-1219	Tracks only	Maui	NA	NA	Tracks	-156.53532	20.949423	no
C-1223	Tracks only	Maui	NA	NA	Tracks	-156.516971	20.881184	no
C-1231	Tracks only	Maui	NA	NA	Tracks	-156.5156413	20.8819028	no
C-1246	Tracks only	Maui	NA	NA	Tracks	-156.520483	20.878814	no
C-1258	Tracks only	Maui	NA	NA	Tracks	-156.522983	20.878361	no
C-1265	Tracks only	Maui	NA	NA	Tracks	-156.304353	20.723317	no
C-1268	Tracks only	Maui	NA	NA	Tracks	-156.304325	20.723381	no
C-1269	Tracks only	Maui	NA	NA	Tracks	-156.304372	20.723408	no
C-1270	Tracks only	Maui	NA	NA	Tracks	-156.304383	20.723392	no
C-1271	Tracks only	Maui	NA	NA	Tracks	-156.304356	20.723411	no
C-1273	Tracks only	Maui	NA	NA	Tracks	-156.304392	20.723419	no
C-1277	Tracks only	Maui	NA	NA	Tracks	-156.304436	20.723417	no
C-1278	Tracks only	Maui	NA	NA	Tracks	-156.304397	20.723456	no
C-1281	Tracks only	Maui	NA	NA	Tracks	-156.304333	20.723415	no
C-1282	Tracks only	Maui	NA	NA	Tracks	-156.3043329	20.7234152	no
C-1283	Tracks only	Maui	NA	NA	Tracks	-156.304034	20.723376	no
C-1284	Tracks only	Maui	NA	NA	Tracks	-156.304322	20.723416	no
C-1285	Tracks only	Maui	NA	NA	Tracks	-156.304335	20.723397	no
C-1291	Tracks only	Kauai	NA	NA	Tracks	-159.674731	22.105583	no
C-1303	Tracks only	Kauai	NA	NA	Tracks	-159.656392	22.123328	no
C-1308	Tracks only	Maui	NA	NA	Tracks	-156.23709699999986	20.767851000000743	no
C-1312	Tracks only	Maui	NA	NA	Tracks	-156.237023	20.767841	no
C-1317	Tracks only	Maui	NA	NA	Tracks	-156.237011	20.767742	no
C-1323	Tracks only	Molokai	NA	NA	Tracks	-156.965847	21.138183	no
C-1324	Tracks only	Maui	NA	NA	Tracks	-156.237142	20.767731	no
C-1325	Tracks only	Maui	NA	NA	Tracks	-156.338758	20.675289	no
C-1326	Tracks only	Maui	NA	NA	Tracks	-156.335925	20.682528	no
C-1330	Tracks only	Molokai	NA	NA	Tracks	-156.9625744	21.13895227	no
C-1333	Tracks only	Maui	NA	NA	Tracks	-156.337953	20.676378	no
C-1334	Tracks only	Molokai	NA	NA	Tracks	-156.962219	21.138736	no
C-1338	Tracks only	Molokai	NA	NA	Tracks	-156.965936	21.138068	no
C-1345	Tracks only	Maui	NA	NA	Tracks	-156.337442	20.677167	no
C-1346	Tracks only	Molokai	NA	NA	Tracks	-156.965924	21.138029	no
C-1350	Tracks only	Molokai	NA	NA	Tracks	-156.965692	21.13825	no
C-1353	Tracks only	Maui	NA	NA	Tracks	-156.337178	20.678869	no
C-1357	Tracks only	Maui	NA	NA	Tracks	-156.337425	20.679342	no
C-1358	Tracks only	Molokai	NA	NA	Tracks	-156.965898	21.138031	no
C-1361	Tracks only	Maui	NA	NA	Tracks	-156.337531	20.679767	no
C-1365	Tracks only	Maui	NA	NA	Tracks	-156.3375388	20.67975544	no
C-1375	Tracks only	Maui	NA	NA	Tracks	-156.134989	20.833459	no
C-1393	Tracks only	Maui	NA	NA	Tracks	-156.044803	20.662875	no
C-1399	Tracks only	Maui	NA	NA	Tracks	-156.050472	20.665292	no
C-1403	Tracks only	Maui	NA	NA	Tracks	-156.050947	20.665419	no
C-1404	Tracks only	Maui	NA	NA	Tracks	-156.051308	20.667172	no
C-1464	Tracks only	Maui	NA	NA	Tracks	-156.236682	20.767667	no
C-1466	Tracks only	Maui	NA	NA	Tracks	-156.2367228	20.7675952	no
C-1475	Tracks only	Maui	NA	NA	Tracks	-156.324148	20.741655	no
C-1478	Tracks only	Maui	NA	NA	Tracks	-156.323137	20.741477	no
C-1483	Tracks only	Maui	NA	NA	Tracks	-156.278061	20.805685	no
C-1484	Tracks only	Maui	NA	NA	Tracks	-156.278061	20.805685	no
C-1488	Tracks only	Maui	NA	NA	Tracks	-156.278061	20.805685	no
C-1497	Tracks only	Maui	NA	NA	Tracks	-156.323365	20.742201	no
C-1499	Tracks only	Maui	NA	NA	Tracks	-156.323751	20.74169	no
C-1503	Tracks only	Maui	NA	NA	Tracks	-156.323611	20.741705	no
C-1507	Tracks only	Maui	NA	NA	Tracks	-156.278061	20.805685	no
C-1516	Tracks only	Maui	NA	NA	Tracks	-156.049029	20.664891	no
C-1524	Tracks only	Maui	NA	NA	Tracks	-156.043728	20.662289	no
C-2525	Tracks only	Maui	NA	NA	Tracks	-156.053103	20.669217	no
C-2534	Tracks only	Maui	NA	NA	Tracks	-156.045088	20.662485	no
C-2541	Tracks only	Maui	NA	NA	Tracks	-156.053494	20.669636	no
C-2543	Tracks only	Maui	NA	NA	Tracks	-156.1862851	20.87449836	no
C-2569	Tracks only	Maui	NA	NA	Tracks	-156.056222	20.671519	no
C-2595	Tracks only	Maui	NA	NA	Tracks	-156.04903	20.66489	no
C-2600	Tracks only	Maui	NA	NA	Tracks	-156.049031	20.664811	no
C-2613	Tracks only	Maui	NA	NA	Tracks	-156.1310363	20.8182189	no
C-2617	Tracks only	Maui	NA	NA	Tracks	-156.136982	20.821591	no
C-2619	Tracks only	Maui	NA	NA	Tracks	-156.137743	20.820946	no
C-2623	Tracks only	Maui	NA	NA	Tracks	-156.134853	20.82969	no
C-2628	Tracks only	Maui	NA	NA	Tracks	-156.353742	20.706119	no
C-2650	Tracks only	Kauai	NA	NA	Tracks	-159.6645	22.121997	no
C-2651	Tracks only	Kauai	NA	NA	Tracks	-159.664528	22.121972	no
C-2668	Tracks only	Big Island	NA	NA	Tracks	-155.228625	19.393117	no
C-2670	Tracks only	Big Island	NA	NA	Tracks	-155.949547	19.719219	no
C-2671	Tracks only	Big Island	NA	NA	Tracks	-155.219231	19.378903	no
C-2676	Tracks only	Big Island	NA	NA	Tracks	-155.231403	19.397111	no
C-2679	Tracks only	Big Island	NA	NA	Tracks	-155.223092	19.384692	no
C-2681	Tracks only	Big Island	NA	NA	Tracks	-155.2169	19.374839	no
C-2682	Tracks only	Big Island	NA	NA	Tracks	-155.218342	19.377203	no
C-2685	Tracks only	Big Island	NA	NA	Tracks	-155.216967	19.374511	no
C-2686	Tracks only	Big Island	NA	NA	Tracks	-155.217894	19.376281	no
C-2690	Tracks only	Big Island	NA	NA	Tracks	-155.223075	19.384625	no
C-2695	Tracks only	Big Island	NA	NA	Tracks	-155.229917	19.395722	no
C-2697	Tracks only	Big Island	NA	NA	Tracks	-155.219214	19.367033	no
C-2700	Tracks only	Big Island	NA	NA	Tracks	-155.140939	19.902211	no
C-2702	Tracks only	Kauai	NA	NA	Tracks	-159.660261	22.131531	no
C-2718	Tracks only	Kauai	NA	NA	Tracks	-159.651342	22.124844	no
C-2722	Tracks only	Kauai	NA	NA	Tracks	-159.651433	22.124808	no
C-2724	Tracks only	Big Island	NA	NA	Tracks	-155.948889	19.718825	no
C-2731	Tracks only	Big Island	NA	NA	Tracks	-155.238239	19.412214	no
C-2734	Tracks only	Kauai	NA	NA	Tracks	-159.656144	22.1238	no
C-2747	Tracks only	Big Island	NA	NA	Tracks	-155.949464	19.719153	no
C-2765	Tracks only	Big Island	NA	NA	Tracks	-155.139911	19.904864	no
C-2768	Tracks only	Big Island	NA	NA	Tracks	-155.441481	20.036428	no
C-2773	Tracks only	Big Island	NA	NA	Tracks	-155.441681	20.036883	no
C-2774	Tracks only	Big Island	NA	NA	Tracks	-155.441625	20.036797	no
C-2781	Tracks only	Big Island	NA	NA	Tracks	-155.441728	20.036889	no
C-2784	Tracks only	Big Island	NA	NA	Tracks	-155.441828	20.03685	no
C-2785	Tracks only	Big Island	NA	NA	Tracks	-155.239192	19.426067	no
C-2789	Tracks only	Big Island	NA	NA	Tracks	-155.615408	19.076544	no
C-2796	Tracks only	Big Island	NA	NA	Tracks	-155.215856	19.428175	no
C-2797	Tracks only	Big Island	NA	NA	Tracks	-155.253442	19.400497	no
C-2799	Tracks only	Big Island	NA	NA	Tracks	-155.236794	19.375836	no
C-2801	Tracks only	Big Island	NA	NA	Tracks	-155.225361	19.371661	no
C-2802	Tracks only	Big Island	NA	NA	Tracks	-155.233961	19.373386	no
C-2813	Tracks only	Big Island	NA	NA	Tracks	-155.22245	19.423789	no
C-2817	Tracks only	Big Island	NA	NA	Tracks	-155.222383	19.4239	no
C-2825	Tracks only	Big Island	NA	NA	Tracks	-155.152275	19.854167	no
C-2852	Tracks only	Big Island	NA	NA	Tracks	-155.439908	20.03535	no
C-2853	Tracks only	Big Island	NA	NA	Tracks	-155.067906	19.590756	no
C-2855	Tracks only	Big Island	NA	NA	Tracks	-155.238369	19.413422	no
C-2858	Tracks only	Big Island	NA	NA	Tracks	-155.439603	20.035417	no
C-2868	Tracks only	Big Island	NA	NA	Tracks	-155.222447	19.423889	no
C-2872	Tracks only	Big Island	NA	NA	Tracks	-155.222494	19.424061	no
C-2876	Tracks only	Big Island	NA	NA	Tracks	-155.222481	19.424106	no
C-2881	Tracks only	Big Island	NA	NA	Tracks	-155.135425	19.904461	no
C-2882	Tracks only	Big Island	NA	NA	Tracks	-155.136294	19.905875	no
C-2884	Tracks only	Big Island	NA	NA	Tracks	-155.134347	19.904056	no
C-2886	Tracks only	Big Island	NA	NA	Tracks	-155.135875	19.905083	no
C-2891	Tracks only	Big Island	NA	NA	Tracks	-155.215906	19.428089	no
C-2896	Tracks only	Big Island	NA	NA	Tracks	-155.4397553	20.03992018	no
C-2900	Tracks only	Big Island	NA	NA	Tracks	-155.443814	20.040636	no
C-2908	Tracks only	Big Island	NA	NA	Tracks	-155.14235300000001	19.90085	no
C-2913	Tracks only	Big Island	NA	NA	Tracks	-155.439531	20.037736	no
C-2914	Tracks only	Big Island	NA	NA	Tracks	-155.444806	20.040872	no
C-2920	Tracks only	Big Island	NA	NA	Tracks	-155.823164	19.111889	no
C-2931	Tracks only	Big Island	NA	NA	Tracks	-155.477011	19.2024	no
C-2932	Tracks only	Big Island	NA	NA	Tracks	-155.483042	19.199917	no
C-2941	Tracks only	Big Island	NA	NA	Tracks	-155.235697	19.407644	no
C-2943	Tracks only	Big Island	NA	NA	Tracks	-155.303328	19.438633	no
C-2947	Tracks only	Big Island	NA	NA	Tracks	-155.232583	19.400919	no
C-2948	Tracks only	Big Island	NA	NA	Tracks	-155.232447	19.400278	no
C-2950	Tracks only	Big Island	NA	NA	Tracks	-155.233097	19.401789	no
C-2952	Tracks only	Big Island	NA	NA	Tracks	-155.234903	19.405075	no
C-2953	Tracks only	Big Island	NA	NA	Tracks	-155.303375	19.438775	no
C-2957	Tracks only	Big Island	NA	NA	Tracks	-155.237086	19.410522	no
C-2959	Tracks only	Big Island	NA	NA	Tracks	-155.473442	20.047111	no
C-2960	Tracks only	Big Island	NA	NA	Tracks	-155.499228	20.049894	no
C-2961	Tracks only	Big Island	NA	NA	Tracks	-155.222486	19.423858	no
C-2963	Tracks only	Big Island	NA	NA	Tracks	-155.491111	20.050194	no
C-2964	Tracks only	Big Island	NA	NA	Tracks	-155.499158	20.049917	no
C-2966	Tracks only	Big Island	NA	NA	Tracks	-155.222497	19.423908	no
C-2967	Tracks only	Big Island	NA	NA	Tracks	-155.222456	19.4239	no
C-2979	Tracks only	Big Island	NA	NA	Tracks	-155.180931	19.4394	no
C-2998	Tracks only	Big Island	NA	NA	Tracks	-155.23705	19.452197	no
C-3003	Tracks only	Big Island	NA	NA	Tracks	-155.262894	19.432325	no
C-3006	Tracks only	Big Island	NA	NA	Tracks	-155.265531	19.430161	no
C-3008	Tracks only	Big Island	NA	NA	Tracks	-155.264608	19.430097	no
C-3009	Tracks only	Big Island	NA	NA	Tracks	-155.263783	19.430011	no
C-3012	Tracks only	Big Island	NA	NA	Tracks	-155.259397	19.42985	no
C-3013	Tracks only	Big Island	NA	NA	Tracks	-155.303142	19.438531	no
C-3014	Tracks only	Big Island	NA	NA	Tracks	-155.26285	19.429875	no
C-3015	Tracks only	Big Island	NA	NA	Tracks	-155.258872	19.429622	no
C-3017	Tracks only	Big Island	NA	NA	Tracks	-155.304819	19.440447	no
C-3023	Tracks only	Big Island	NA	NA	Tracks	-155.301939	19.442925	no
C-3025	Tracks only	Big Island	NA	NA	Tracks	-155.262067	19.429597	no
C-3032	Tracks only	Big Island	NA	NA	Tracks	-155.069056	19.590467	no
C-3033	Tracks only	Big Island	NA	NA	Tracks	-155.259344	19.430672	no
C-3035	Tracks only	Big Island	NA	NA	Tracks	-155.224797	19.355289	no
C-3037	Tracks only	Big Island	NA	NA	Tracks	-155.22485	19.354839	no
C-3040	Tracks only	Big Island	NA	NA	Tracks	-155.259625	19.430828	no
C-3041	Tracks only	Big Island	NA	NA	Tracks	-155.222342	19.424381	no
C-3044	Tracks only	Big Island	NA	NA	Tracks	-155.222089	19.424519	no
C-3050	Tracks only	Big Island	NA	NA	Tracks	-155.222053	19.424533	no
C-3051	Tracks only	Big Island	NA	NA	Tracks	-155.222131	19.423986	no
C-3052	Tracks only	Big Island	NA	NA	Tracks	-155.222189	19.424033	no
C-3054	Tracks only	Big Island	NA	NA	Tracks	-155.222364	19.423831	no
C-3056	Tracks only	Big Island	NA	NA	Tracks	-155.224617	19.356067	no
C-3057	Tracks only	Big Island	NA	NA	Tracks	-155.068378	19.590575	no
C-3059	Tracks only	Big Island	NA	NA	Tracks	-155.222475	19.423833	no
C-3060	Tracks only	Big Island	NA	NA	Tracks	-155.222633	19.423947	no
C-3066	Tracks only	Big Island	NA	NA	Tracks	-155.578681	20.041714	no
C-3067	Tracks only	Big Island	NA	NA	Tracks	-155.441869	20.039817	no
C-3069	Tracks only	Big Island	NA	NA	Tracks	-155.068592	19.725608	no
C-3080	Tracks only	Big Island	NA	NA	Tracks	-155.236931	19.452128	no
C-3087	Tracks only	Big Island	NA	NA	Tracks	-155.438289	20.039922	no
C-3091	Tracks only	Big Island	NA	NA	Tracks	-155.438314	20.039108	no
C-3101	Tracks only	Big Island	NA	NA	Tracks	-155.222458	19.423869	no
C-3105	Tracks only	Big Island	NA	NA	Tracks	-155.222481	19.423853	no
C-3109	Tracks only	Big Island	NA	NA	Tracks	-155.520606	20.053303	no
C-3111	Tracks only	Big Island	NA	NA	Tracks	-155.438556	20.039914	no
C-3113	Tracks only	Big Island	NA	NA	Tracks	-155.513081	20.049936	no
C-3116	Tracks only	Big Island	NA	NA	Tracks	-155.615733	19.076644	no
C-3117	Tracks only	Big Island	NA	NA	Tracks	-155.506242	20.050242	no
C-3123	Tracks only	Big Island	NA	NA	Tracks	-155.441056	20.037814	no
C-3124	Tracks only	Big Island	NA	NA	Tracks	-155.441792	20.036869	no
C-3126	Tracks only	Big Island	NA	NA	Tracks	-155.818903	19.115214	no
C-3127	Tracks only	Big Island	NA	NA	Tracks	-155.443525	20.032403	no
C-3139	Tracks only	Big Island	NA	NA	Tracks	-155.441503	20.039906	no
C-3140	Tracks only	Big Island	NA	NA	Tracks	-155.134794	19.905064	no
C-3141	Tracks only	Big Island	NA	NA	Tracks	-155.441517	20.037208	no
C-3145	Tracks only	Big Island	NA	NA	Tracks	-155.438519	20.038772	no
C-3161	Tracks only	Big Island	NA	NA	Tracks	-155.948608	19.719447	no
C-3166	Tracks only	Big Island	NA	NA	Tracks	-155.823725	19.111136	no
C-3168	Tracks only	Big Island	NA	NA	Tracks	-155.441511	20.039856	no
C-3170	Tracks only	Big Island	NA	NA	Tracks	-155.4379	20.038883	no
C-3172	Tracks only	Big Island	NA	NA	Tracks	-155.134761	19.904239	no
C-3175	Tracks only	Big Island	NA	NA	Tracks	-155.441167	20.037453	no
C-3184	Tracks only	Big Island	NA	NA	Tracks	-155.239767	19.425681	no
C-3185	Tracks only	Big Island	NA	NA	Tracks	-155.443494	20.032353	no
C-3187	Tracks only	Big Island	NA	NA	Tracks	-155.624194	19.080883	no
C-3196	Tracks only	Big Island	NA	NA	Tracks	-155.194689	19.443014	no
C-3199	Tracks only	Big Island	NA	NA	Tracks	-155.183528	19.44375	no
C-3202	Tracks only	Big Island	NA	NA	Tracks	-155.948806	19.718303	no
C-3206	Tracks only	Big Island	NA	NA	Tracks	-155.620339	19.092408	no
C-3207	Tracks only	Big Island	NA	NA	Tracks	-155.239672	19.425922	no
C-3215	Tracks only	Big Island	NA	NA	Tracks	-155.239642	19.425936	no
C-3216	Tracks only	Big Island	NA	NA	Tracks	-155.441103	20.035983	no
C-3219	Tracks only	Big Island	NA	NA	Tracks	-155.2394	19.426167	no
C-3227	Tracks only	Big Island	NA	NA	Tracks	-155.239747	19.425733	no
C-3232	Tracks only	Big Island	NA	NA	Tracks	-155.239103	19.426333	no
C-3238	Tracks only	Big Island	NA	NA	Tracks	-155.621433	19.078836	no
C-3239	Tracks only	Big Island	NA	NA	Tracks	-155.239736	19.425839	no
C-3240	Tracks only	Big Island	NA	NA	Tracks	-155.192975	19.440036	no
C-3245	Tracks only	Big Island	NA	NA	Tracks	-155.82475	19.117631	no
C-3253	Tracks only	Big Island	NA	NA	Tracks	-155.819711	19.117583	no
C-3255	Tracks only	Big Island	NA	NA	Tracks	-155.824825	19.117742	no
C-3259	Tracks only	Big Island	NA	NA	Tracks	-155.948519	19.719211	no
C-3261	Tracks only	Big Island	NA	NA	Tracks	-155.821853	19.119458	no
C-3268	Tracks only	Big Island	NA	NA	Tracks	-155.618558	19.089864	no
C-3269	Tracks only	Big Island	NA	NA	Tracks	-155.818461	19.115431	no
C-3271	Tracks only	Big Island	NA	NA	Tracks	-155.948725	19.720228	no
C-3275	Tracks only	Big Island	NA	NA	Tracks	-155.825208	19.117225	no
C-3276	Tracks only	Big Island	NA	NA	Tracks	-155.526464	19.748753	no
C-3278	Tracks only	Big Island	NA	NA	Tracks	-155.819044	19.115258	no
C-3291	Tracks only	Big Island	NA	NA	Tracks	-155.819439	19.115244	no
C-3296	Tracks only	Big Island	NA	NA	Tracks	-155.389261	19.345478	no
C-3297	Tracks only	Big Island	NA	NA	Tracks	-155.819872	19.114969	no
C-3298	Tracks only	Big Island	NA	NA	Tracks	-155.822006	19.119394	no
C-3302	Tracks only	Big Island	NA	NA	Tracks	-155.069058	19.726106	no
C-3303	Tracks only	Big Island	NA	NA	Tracks	-155.069494	19.725292	no
C-3314	Tracks only	Big Island	NA	NA	Tracks	-154.901197	19.483125	no
C-3316	Tracks only	Big Island	NA	NA	Tracks	-155.441756	20.036897	no
C-3321	Tracks only	Big Island	NA	NA	Tracks	-154.902808	19.483389	no
C-3323	Tracks only	Big Island	NA	NA	Tracks	-155.443042	20.0337	no
C-3327	Tracks only	Big Island	NA	NA	Tracks	-155.443053	20.034031	no
C-3328	Tracks only	Big Island	NA	NA	Tracks	-155.44125	20.037503	no
C-3329	Tracks only	Big Island	NA	NA	Tracks	-155.068147	19.726039	no
C-3331	Tracks only	Big Island	NA	NA	Tracks	-155.442911	20.034836	no
C-3332	Tracks only	Big Island	NA	NA	Tracks	-155.441431	20.037308	no
C-3336	Tracks only	Big Island	NA	NA	Tracks	-155.441778	20.036628	no
C-3341	Tracks only	Big Island	NA	NA	Tracks	-154.902847	19.482961	no
C-3345	Tracks only	Big Island	NA	NA	Tracks	-154.902528	19.483144	no
C-3346	Tracks only	Big Island	NA	NA	Tracks	-154.904214	19.482925	no
C-3351	Tracks only	Big Island	NA	NA	Tracks	-155.442083	20.036456	no
C-3355	Tracks only	Big Island	NA	NA	Tracks	-155.441744	20.036864	no
C-3359	Tracks only	Big Island	NA	NA	Tracks	-155.44175	20.036861	no
C-3369	Tracks only	Big Island	NA	NA	Tracks	-154.903356	19.483244	no
C-3373	Tracks only	Big Island	NA	NA	Tracks	-154.903017	19.483386	no
C-3377	Tracks only	Big Island	NA	NA	Tracks	-154.902847	19.483406	no
C-3384	Tracks only	Big Island	NA	NA	Tracks	-155.619686	19.092197	no
C-3389	Tracks only	Big Island	NA	NA	Tracks	-154.902725	19.483572	no
C-3393	Tracks only	Big Island	NA	NA	Tracks	-154.901461	19.483572	no
C-3396	Tracks only	Big Island	NA	NA	Tracks	-155.619719	19.094339	no
C-3407	Tracks only	Big Island	NA	NA	Tracks	-155.239919	19.425508	no
C-3408	Tracks only	Big Island	NA	NA	Tracks	-155.233567	19.430089	no
C-3409	Tracks only	Big Island	NA	NA	Tracks	-154.902547	19.483386	no
C-3411	Tracks only	Big Island	NA	NA	Tracks	-155.239869	19.425756	no
C-3416	Tracks only	Big Island	NA	NA	Tracks	-155.240017	19.425533	no
C-3420	Tracks only	Big Island	NA	NA	Tracks	-155.239767	19.425556	no
C-3425	Tracks only	Big Island	NA	NA	Tracks	-155.239361	19.426028	no
C-3429	Tracks only	Big Island	NA	NA	Tracks	-155.239181	19.426292	no
C-3437	Tracks only	Big Island	NA	NA	Tracks	-155.239558	19.426181	no
C-3441	Tracks only	Big Island	NA	NA	Tracks	-155.239789	19.425775	no
C-3486	Tracks only	Big Island	NA	NA	Tracks	-155.162911	19.932525	no
C-3509	Tracks only	Big Island	NA	NA	Tracks	-155.101483	19.850811	no
C-3514	Tracks only	Big Island	NA	NA	Tracks	-155.220867	19.952739	no
C-3517	Tracks only	Big Island	NA	NA	Tracks	-155.141383	19.906744	no
C-3518	Tracks only	Big Island	NA	NA	Tracks	-155.223633	19.950136	no
C-0016	Not genotyped	Oahu	NA	NA	Yes	-157.722458	21.314133000000002	no
C-0022	Not genotyped	Oahu	NA	NA	Yes	-157.722117	21.313558	no
C-0034	Not genotyped	Oahu	NA	NA	Yes	-157.806203	21.386039	no
C-0040	Not genotyped	Oahu	NA	NA	Yes	-157.799769	21.380525	no
C-0041	Not genotyped	Oahu	NA	NA	Yes	-157.723156	21.306561	no
C-0043	Not genotyped	Oahu	NA	NA	Yes	-157.857283	21.315943999999998	no
C-0045	Not genotyped	Oahu	NA	NA	Yes	-157.855097	21.320142	no
C-0046	Not genotyped	Oahu	NA	NA	Yes	-157.724197	21.306325	no
C-0048	Not genotyped	Oahu	NA	NA	Yes	-157.799853	21.379644	no
C-0050	Not genotyped	Oahu	NA	NA	Yes	-157.799903	21.379406	no
C-0073	Not genotyped	Oahu	NA	NA	Yes	-157.805953	21.351833	no
C-0089	Not genotyped	Oahu	NA	NA	Yes	-157.800017	21.335367	no
C-0092	Not genotyped	Oahu	NA	NA	Yes	-157.800733	21.334156	no
C-0095	Not genotyped	Oahu	NA	NA	Yes	-157.857878	21.3167	no
C-0106	Not genotyped	Oahu	NA	NA	Yes	-157.805522	21.387036	no
C-0107	Not genotyped	Kauai	NA	NA	Yes	-159.594322	22.191986	no
C-0110	Not genotyped	Kauai	NA	NA	Yes	-159.594856	22.198258	no
C-0139	Not genotyped	Kauai	NA	NA	Yes	-159.617275	22.147472	no
C-0145	Not genotyped	Kauai	NA	NA	Yes	-159.617131	22.153006	no
C-0151	Not genotyped	Kauai	NA	NA	Yes	-159.617225	22.153236	no
C-0172	Not genotyped	Kauai	NA	NA	Yes	-159.613294	22.146892	no
C-0178	Not genotyped	Kauai	NA	NA	Yes	-159.323025	22.076153	no
C-0180	Not genotyped	Kauai	NA	NA	Yes	-159.595022	22.200453	no
C-0182	Not genotyped	Kauai	NA	NA	Yes	-159.597203	22.207692	no
C-0185	Not genotyped	Kauai	NA	NA	Yes	-159.585581	22.217458	no
C-0198	Not genotyped	Kauai	NA	NA	Yes	-159.597147	22.207494	no
C-0216	Not genotyped	Kauai	NA	NA	Yes	-159.617156	22.15325	no
C-0217	Not genotyped	Kauai	NA	NA	Yes	-159.594633	22.199528	no
C-0218	Not genotyped	Kauai	NA	NA	Yes	-159.595008	22.200481	no
C-0230	Not genotyped	Kauai	NA	NA	Yes	-159.6423375	22.15028957	no
C-0233	Not genotyped	Kauai	NA	NA	Yes	-159.641075	22.136639	no
C-0236	Not genotyped	Kauai	NA	NA	Yes	-159.641314	22.134103	no
C-0238	Not genotyped	Kauai	NA	NA	Yes	-159.674439	22.094539	no
C-0240	Not genotyped	Kauai	NA	NA	Yes	-159.5737687	22.12600815	no
C-0247	Not genotyped	Kauai	NA	NA	Yes	-159.647394	22.144611	no
C-0251	Not genotyped	Kauai	NA	NA	Yes	-159.42095	22.074733	no
C-0261	Not genotyped	Kauai	NA	NA	Yes	-159.426017	22.081542	no
C-0270	Not genotyped	Kauai	NA	NA	Yes	-159.387061	22.102608	no
C-0273	Not genotyped	Kauai	NA	NA	Yes	-159.350322	22.082389	no
C-0291	Not genotyped	Kauai	NA	NA	Yes	-159.425928	22.081581	no
C-0295	Not genotyped	Kauai	NA	NA	Yes	-159.425992	22.081661	no
C-0301	Not genotyped	Kauai	NA	NA	Yes	-159.472681	22.201183	no
C-0304	Not genotyped	Maui	NA	NA	Yes	-156.535525	20.948894	no
C-0309	Not genotyped	Kauai	NA	NA	Yes	-159.4728	22.201656	no
C-0320	Not genotyped	Maui	NA	NA	Yes	-156.536608	20.949722	no
C-0324	Not genotyped	Maui	NA	NA	Yes	-156.335369	20.672186	no
C-0332	Not genotyped	Maui	NA	NA	Yes	-156.336258	20.671633	no
C-0351	Not genotyped	Maui	NA	NA	Yes	-156.536525	20.948725	no
C-0352	Not genotyped	Maui	NA	NA	Yes	-156.330458	20.679658	no
C-0361	Not genotyped	Maui	NA	NA	Yes	-156.339942	20.673981	no
C-0397	Not genotyped	Maui	NA	NA	Yes	-156.332864	20.675433	no
C-0400	Not genotyped	Maui	NA	NA	Yes	-156.096019	20.8075	no
C-0419	Not genotyped	Maui	NA	NA	Yes	-156.046589	20.793231	no
C-0422	Not genotyped	Kauai	NA	NA	Yes	-159.426061	22.082511	no
C-0423	Not genotyped	Kauai	NA	NA	Yes	-159.421142	22.075014	no
C-0432	Not genotyped	Kauai	NA	NA	Yes	-159.427372	22.087633	no
C-0435	Not genotyped	Kauai	NA	NA	Yes	-159.429611	22.089911	no
C-0437	Not genotyped	Kauai	NA	NA	Yes	-159.424778	22.079914	no
C-0439	Not genotyped	Kauai	NA	NA	Yes	-159.426103	22.081256	no
C-0471	Not genotyped	Kauai	NA	NA	Yes	-159.6237	22.149294	no
C-0476	Not genotyped	Kauai	NA	NA	Yes	-159.615914	22.148772	no
C-0488	Not genotyped	Kauai	NA	NA	Yes	-159.641355	22.149134	no
C-0489	Not genotyped	Kauai	NA	NA	Yes	-159.6413417	22.1491113	no
C-0491	Not genotyped	Kauai	NA	NA	Yes	-159.641366	22.149098	no
C-0493	Not genotyped	Kauai	NA	NA	Yes	-159.64133	22.1490685	no
C-0495	Not genotyped	Kauai	NA	NA	Yes	-159.646283	22.151208	no
C-0525	Not genotyped	Kauai	NA	NA	Yes	-159.660439	22.131492	no
C-0526	Not genotyped	Kauai	NA	NA	Yes	-159.660456	22.1315	no
C-0534	Not genotyped	Kauai	NA	NA	Yes	-159.660083	22.131897	no
C-0536	Not genotyped	Kauai	NA	NA	Yes	-159.660564	22.132928	no
C-0544	Not genotyped	Kauai	NA	NA	Yes	-159.6444975	22.13606677	no
C-0549	Not genotyped	Kauai	NA	NA	Yes	-159.4056079	22.05560838	no
C-0551	Not genotyped	Kauai	NA	NA	Yes	-159.412447	22.083419	no
C-0561	Not genotyped	Kauai	NA	NA	Yes	-159.377319	21.995411	no
C-0566	Not genotyped	Kauai	NA	NA	Yes	-159.6641103	22.1214994	no
C-0569	Not genotyped	Kauai	NA	NA	Yes	-159.664492	22.121844	no
C-0596	Not genotyped	Kauai	NA	NA	Yes	-159.662422	22.133847	no
C-0600	Not genotyped	Kauai	NA	NA	Yes	-159.650711	22.141514	no
C-0601	Not genotyped	Kauai	NA	NA	Yes	-159.664394	22.121886	no
C-0620	Not genotyped	Molokai	NA	NA	Yes	-156.965933	21.137994	no
C-0626	Not genotyped	Molokai	NA	NA	Yes	-157.005386	21.177153	no
C-0636	Not genotyped	Molokai	NA	NA	Yes	-157.008278	21.175561	no
C-0647	Not genotyped	Molokai	NA	NA	Yes	-157.005344	21.176989	no
C-0648	Not genotyped	Molokai	NA	NA	Yes	-157.005483	21.177225	no
C-0652	Not genotyped	Kauai	NA	NA	Yes	-159.650444	22.125197	no
C-0656	Not genotyped	Kauai	NA	NA	Yes	-159.660475	22.131533	no
C-0657	Not genotyped	Kauai	NA	NA	Yes	-159.660417	22.13155	no
C-0670	Not genotyped	Kauai	NA	NA	Yes	-159.660244	22.129983	no
C-0675	Not genotyped	Kauai	NA	NA	Yes	-159.663578	22.134589	no
C-0683	Not genotyped	Kauai	NA	NA	Yes	-159.65635	22.123311	no
C-0686	Not genotyped	Kauai	NA	NA	Yes	-159.65171900000001	22.124711	no
C-0695	Not genotyped	Kauai	NA	NA	Yes	-159.660297	22.131219	no
C-0699	Not genotyped	Kauai	NA	NA	Yes	-159.41745	22.071358	no
C-0703	Not genotyped	Kauai	NA	NA	Yes	-159.417489	22.071339	no
C-0704	Not genotyped	Kauai	NA	NA	Yes	-159.417514	22.07135	no
C-0705	Not genotyped	Kauai	NA	NA	Yes	-159.417575	22.071314	no
C-0706	Not genotyped	Kauai	NA	NA	Yes	-159.417494	22.071339	no
C-0720	Not genotyped	Kauai	NA	NA	Yes	-159.417392	22.071319	no
C-0742	Not genotyped	Kauai	NA	NA	Yes	-159.6239042	22.15699653	no
C-0760	Not genotyped	Molokai	NA	NA	Yes	-157.005394	21.177024	no
C-0765	Not genotyped	Molokai	NA	NA	Yes	-157.0050015	21.1764271	no
C-0769	Not genotyped	Molokai	NA	NA	Yes	-157.004952	21.176117	no
C-0774	Not genotyped	Molokai	NA	NA	Yes	-157.005086	21.176817	no
C-0778	Not genotyped	Molokai	NA	NA	Yes	-157.005272	21.177161	no
C-0784	Not genotyped	Kauai	NA	NA	Yes	-159.425964	22.081611	no
C-0785	Not genotyped	Kauai	NA	NA	Yes	-159.4259925	22.08160875	no
C-0793	Not genotyped	Kauai	NA	NA	Yes	-159.436544	22.093108	no
C-0798	Not genotyped	Kauai	NA	NA	Yes	-159.431919	22.092206	no
C-0802	Not genotyped	Kauai	NA	NA	Yes	-159.423239	22.079556	no
C-0810	Not genotyped	Kauai	NA	NA	Yes	-159.642053	22.149944	no
C-0832	Not genotyped	Kauai	NA	NA	Yes	-159.649506	22.141094	no
C-0838	Not genotyped	Kauai	NA	NA	Yes	-159.653472	22.142489	no
C-0852	Not genotyped	Maui	NA	NA	Yes	-156.335097	20.6723	no
C-0861	Not genotyped	Kauai	NA	NA	Yes	-159.477239	22.198547	no
C-0868	Not genotyped	Maui	NA	NA	Yes	-156.179826	20.870622	no
C-0877	Not genotyped	Molokai	NA	NA	Yes	-156.962086	21.138683	no
C-0883	Not genotyped	Kauai	NA	NA	Yes	-159.357272	22.046528	no
C-0889	Not genotyped	Molokai	NA	NA	Yes	-156.965825	21.138075	no
C-0890	Not genotyped	Kauai	NA	NA	Yes	-159.474906	22.200692	no
C-0896	Not genotyped	Maui	NA	NA	Yes	-156.0758536	20.79521364	no
C-0897	Not genotyped	Molokai	NA	NA	Yes	-156.962206	21.138594	no
C-0900	Not genotyped	Maui	NA	NA	Yes	-156.0758536	20.79521364	no
C-0901	Not genotyped	Maui	NA	NA	Yes	-156.119858	20.813907	no
C-0908	Not genotyped	Maui	NA	NA	Yes	-156.186331	20.874575	no
C-0914	Not genotyped	Kauai	NA	NA	Yes	-159.392978	22.088439	no
C-0917	Not genotyped	Maui	NA	NA	Yes	-156.021613	20.782702	no
C-0925	Not genotyped	Kauai	NA	NA	Yes	-159.478569	22.19435	no
C-0931	Not genotyped	Maui	NA	NA	Yes	-156.18645	20.874611	no
C-0933	Not genotyped	Kauai	NA	NA	Yes	-159.478628	22.194333	no
C-0946	Not genotyped	Kauai	NA	NA	Yes	-159.388664	22.085494	no
C-0948	Not genotyped	Maui	NA	NA	Yes	-156.332644	20.673317	no
C-0959	Not genotyped	Maui	NA	NA	Yes	-156.186153	20.874981	no
C-0971	Not genotyped	Kauai	NA	NA	Yes	-159.663178	22.069317	no
C-0995	Not genotyped	Kauai	NA	NA	Yes	-159.664358	22.121906	no
C-0998	Not genotyped	Kauai	NA	NA	Yes	-159.387989	22.085411	no
C-1011	Not genotyped	Kauai	NA	NA	Yes	-159.664408	22.121856	no
C-1027	Not genotyped	Kauai	NA	NA	Yes	-159.4306965	22.0906804	no
C-1028	Not genotyped	Kauai	NA	NA	Yes	-159.435375	22.092883	no
C-1030	Not genotyped	Kauai	NA	NA	Yes	-159.434858	22.092628	no
C-1035	Not genotyped	Kauai	NA	NA	Yes	-159.429758	22.090067	no
C-1043	Not genotyped	Kauai	NA	NA	Yes	-159.426128	22.081219	no
C-1065	Not genotyped	Kauai	NA	NA	Yes	-159.417467	22.071328	no
C-1070	Not genotyped	Kauai	NA	NA	Yes	-159.417539	22.071475	no
C-1094	Not genotyped	Maui	NA	NA	Yes	-156.33315	20.674575	no
C-1132	Not genotyped	Maui	NA	NA	Yes	-156.511681	20.925994	no
C-1135	Not genotyped	Maui	NA	NA	Yes	-156.536079	20.948536	no
C-1136	Not genotyped	Maui	NA	NA	Yes	-156.53532	20.949419	no
C-1139	Not genotyped	Maui	NA	NA	Yes	-156.545172	20.881073	no
C-1150	Not genotyped	Maui	NA	NA	Yes	-156.339833	20.670556	no
C-1153	Not genotyped	Maui	NA	NA	Yes	-156.536566	20.949786	no
C-1161	Not genotyped	Maui	NA	NA	Yes	-156.536336	20.949052	no
C-1167	Not genotyped	Kauai	NA	NA	Yes	-159.656172	22.123639	no
C-1172	Not genotyped	Maui	NA	NA	Yes	-156.336792	20.682039	no
C-1173	Not genotyped	Maui	NA	NA	Yes	-156.337803	20.669308	no
C-1180	Not genotyped	Maui	NA	NA	Yes	-156.329244	20.681897	no
C-1186	Not genotyped	Kauai	NA	NA	Yes	-159.657036	22.122611	no
C-1195	Not genotyped	Kauai	NA	NA	Yes	-159.654336	22.124353	no
C-1217	Not genotyped	Maui	NA	NA	Yes	-156.0650423	20.78352803	no
C-1235	Not genotyped	Maui	NA	NA	Yes	-156.517755	20.880652	no
C-1238	Not genotyped	Maui	NA	NA	Yes	-156.1726858	20.8704763	no
C-1251	Not genotyped	Maui	NA	NA	Yes	-156.535697	20.948885	no
C-1253	Not genotyped	Maui	NA	NA	Yes	-156.0650423	20.78352803	no
C-1263	Not genotyped	Maui	NA	NA	Yes	-155.986918	20.749597	no
C-1266	Not genotyped	Maui	NA	NA	Yes	-156.304344	20.723386	no
C-1267	Not genotyped	Maui	NA	NA	Yes	-156.304353	20.723413999999998	no
C-1274	Not genotyped	Maui	NA	NA	Yes	-156.304278	20.723336	no
C-1275	Not genotyped	Maui	NA	NA	Yes	-156.304339	20.723328	no
C-1280	Not genotyped	Maui	NA	NA	Yes	-156.304339	20.723381	no
C-1288	Not genotyped	Kauai	NA	NA	Yes	-159.657503	22.130592	no
C-1305	Not genotyped	Kauai	NA	NA	Yes	-159.65615	22.123619	no
C-1307	Not genotyped	Maui	NA	NA	Yes	-156.237113	20.767852	no
C-1311	Not genotyped	Maui	NA	NA	Yes	-156.236942	20.767856	no
C-1314	Not genotyped	Maui	NA	NA	Yes	-156.237011	20.767742	no
C-1318	Not genotyped	Maui	NA	NA	Yes	-156.236978	20.767728	no
C-1321	Not genotyped	Maui	NA	NA	Yes	-156.339419	20.674856	no
C-1327	Not genotyped	Molokai	NA	NA	Yes	-156.965931	21.138097	no
C-1331	Not genotyped	Molokai	NA	NA	Yes	-156.965194	21.138383	no
C-1332	Not genotyped	Maui	NA	NA	Yes	-156.237044	20.7677	no
C-1335	Not genotyped	Molokai	NA	NA	Yes	-156.975492	21.138353	no
C-1336	Not genotyped	Maui	NA	NA	Yes	-156.237081	20.76785	no
C-1340	Not genotyped	Maui	NA	NA	Yes	-156.237028	20.767747	no
C-1344	Not genotyped	Maui	NA	NA	Yes	-156.237133	20.767822	no
C-1383	Not genotyped	Maui	NA	NA	Yes	-156.045447	20.663775	no
C-1388	Not genotyped	Maui	NA	NA	Yes	-156.046514	20.663992	no
C-1392	Not genotyped	Maui	NA	NA	Yes	-156.048233	20.664758	no
C-1398	Not genotyped	Maui	NA	NA	Yes	-156.049694	20.665028	no
C-1406	Not genotyped	Maui	NA	NA	Yes	-156.051453	20.667172	no
C-1470	Not genotyped	Maui	NA	NA	Yes	-156.237166	20.767916	no
C-1472	Not genotyped	Maui	NA	NA	Yes	-156.237109	20.767871	no
C-1474	Not genotyped	Maui	NA	NA	Yes	-156.236737	20.768539	no
C-1476	Not genotyped	Maui	NA	NA	Yes	-156.3231545	20.7418607	no
C-1479	Not genotyped	Maui	NA	NA	Yes	-156.32326	20.741846	no
C-1486	Not genotyped	Maui	NA	NA	Yes	-155.7052173	19.92253451	no
C-1490	Not genotyped	Maui	NA	NA	Yes	-155.7052173	19.92253451	no
C-1514	Not genotyped	Maui	NA	NA	Yes	-156.04065	20.672082	no
C-2526	Not genotyped	Maui	NA	NA	Yes	-156.056753	20.673808	no
C-2535	Not genotyped	Maui	NA	NA	Yes	-156.186286	20.874497	no
C-2538	Not genotyped	Maui	NA	NA	Yes	-156.069746	20.649771	no
C-2542	Not genotyped	Maui	NA	NA	Yes	-156.073693	20.650899	no
C-2561	Not genotyped	Maui	NA	NA	Yes	-156.055531	20.671114	no
C-2573	Not genotyped	Maui	NA	NA	Yes	-156.056261	20.672364	no
C-2583	Not genotyped	Maui	NA	NA	Yes	-156.056206	20.675447	no
C-2585	Not genotyped	Maui	NA	NA	Yes	-156.056914	20.675828	no
C-2587	Not genotyped	Maui	NA	NA	Yes	-156.056878	20.675658	no
C-2588	Not genotyped	Maui	NA	NA	Yes	-156.056908	20.676083	no
C-2589	Not genotyped	Maui	NA	NA	Yes	-156.056631	20.676119	no
C-2590	Not genotyped	Maui	NA	NA	Yes	-156.056403	20.676775	no
C-2592	Not genotyped	Maui	NA	NA	Yes	-156.049019	20.664889	no
C-2606	Not genotyped	Maui	NA	NA	Yes	-156.125569	20.8162	no
C-2614	Not genotyped	Maui	NA	NA	Yes	-156.133087	20.820666	no
C-2615	Not genotyped	Maui	NA	NA	Yes	-156.136464	20.822125	no
C-2620	Not genotyped	Maui	NA	NA	Yes	-156.13799	20.820805	no
C-2622	Not genotyped	Maui	NA	NA	Yes	-156.124325	20.81698	no
C-2625	Not genotyped	Maui	NA	NA	Yes	-156.136842	20.821963	no
C-2630	Not genotyped	Maui	NA	NA	Yes	-156.124198	20.816923	no
C-2645	Not genotyped	Kauai	NA	NA	Yes	-159.676608	22.098756	no
C-2652	Not genotyped	Kauai	NA	NA	Yes	-159.664442	22.122028	no
C-2658	Not genotyped	Kauai	NA	NA	Yes	-159.664503	22.121878	no
C-2659	Not genotyped	Kauai	NA	NA	Yes	-159.664453	22.121897	no
C-2660	Not genotyped	Kauai	NA	NA	Yes	-159.664458	22.121864	no
C-2706	Not genotyped	Kauai	NA	NA	Yes	-159.660358	22.13155	no
C-2795	Not genotyped	Big Island	NA	NA	Yes	-155.281083	19.434306	no
C-2800	Not genotyped	Big Island	NA	NA	Yes	-155.225767	19.371161	no
C-2806	Not genotyped	Big Island	NA	NA	Yes	-155.224775	19.356728	no
C-2807	Not genotyped	Big Island	NA	NA	Yes	-155.224933	19.354031	no
C-2815	Not genotyped	Big Island	NA	NA	Yes	-155.221756	19.424228	no
C-2819	Not genotyped	Big Island	NA	NA	Yes	-155.222278	19.424294	no
C-2835	Not genotyped	Big Island	NA	NA	Yes	-155.117564	19.715992	no
C-2837	Not genotyped	Big Island	NA	NA	Yes	-155.067208	19.589497	no
C-2871	Not genotyped	Big Island	NA	NA	Yes	-155.237056	19.415014	no
C-2874	Not genotyped	Big Island	NA	NA	Yes	-155.138281	19.714875	no
C-2893	Not genotyped	Big Island	NA	NA	Yes	-155.438383	20.039881	no
C-2895	Not genotyped	Big Island	NA	NA	Yes	-155.439597	20.039919	no
C-2905	Not genotyped	Big Island	NA	NA	Yes	-155.067133	19.590792	no
C-2928	Not genotyped	Big Island	NA	NA	Yes	-155.664306	19.077031	no
C-2949	Not genotyped	Big Island	NA	NA	Yes	-155.232639	19.400906	no
C-2954	Not genotyped	Big Island	NA	NA	Yes	-155.234953	19.405203	no
C-2956	Not genotyped	Big Island	NA	NA	Yes	-155.237122	19.410464	no
C-2968	Not genotyped	Big Island	NA	NA	Yes	-155.069006	19.59055	no
C-2970	Not genotyped	Big Island	NA	NA	Yes	-155.068172	19.589725	no
C-2989	Not genotyped	Big Island	NA	NA	Yes	-155.440019	20.039544	no
C-2999	Not genotyped	Big Island	NA	NA	Yes	-155.237092	19.453194	no
C-3005	Not genotyped	Big Island	NA	NA	Yes	-155.263944	19.43265	no
C-3020	Not genotyped	Big Island	NA	NA	Yes	-155.302228	19.442844	no
C-3024	Not genotyped	Big Island	NA	NA	Yes	-155.304133	19.439686	no
C-3029	Not genotyped	Big Island	NA	NA	Yes	-155.069311	19.590053	no
C-3039	Not genotyped	Big Island	NA	NA	Yes	-155.222125	19.424558	no
C-3042	Not genotyped	Big Island	NA	NA	Yes	-155.222436	19.424056	no
C-3046	Not genotyped	Big Island	NA	NA	Yes	-155.222111	19.424494	no
C-3049	Not genotyped	Big Island	NA	NA	Yes	-155.222036	19.424333	no
C-3053	Not genotyped	Big Island	NA	NA	Yes	-155.222439	19.424075	no
C-3072	Not genotyped	Big Island	NA	NA	Yes	-155.237536	19.453008	no
C-3073	Not genotyped	Big Island	NA	NA	Yes	-155.067978	19.725778	no
C-3077	Not genotyped	Big Island	NA	NA	Yes	-155.068331	19.590617	no
C-3086	Not genotyped	Big Island	NA	NA	Yes	-155.672889	20.020514	no
C-3095	Not genotyped	Big Island	NA	NA	Yes	-155.438175	20.039197	no
C-3100	Not genotyped	Big Island	NA	NA	Yes	-155.441325	20.035953	no
C-3104	Not genotyped	Big Island	NA	NA	Yes	-155.441183	20.035958	no
C-3106	Not genotyped	Big Island	NA	NA	Yes	-155.515456	20.0667	no
C-3118	Not genotyped	Big Island	NA	NA	Yes	-155.442194	20.039967	no
C-3125	Not genotyped	Big Island	NA	NA	Yes	-155.474764	20.058511	no
C-3129	Not genotyped	Big Island	NA	NA	Yes	-155.439422	20.039867	no
C-3132	Not genotyped	Big Island	NA	NA	Yes	-155.136031	19.906139	no
C-3144	Not genotyped	Big Island	NA	NA	Yes	-155.438253	20.039967	no
C-3163	Not genotyped	Big Island	NA	NA	Yes	-155.4434	20.040486	no
C-3198	Not genotyped	Big Island	NA	NA	Yes	-155.821142	19.113939	no
C-3204	Not genotyped	Big Island	NA	NA	Yes	-155.440556	20.035678	no
C-3222	Not genotyped	Big Island	NA	NA	Yes	-155.618167	19.097653	no
C-3223	Not genotyped	Big Island	NA	NA	Yes	-155.239308	19.426172	no
C-3231	Not genotyped	Big Island	NA	NA	Yes	-155.239642	19.425822	no
C-3234	Not genotyped	Big Island	NA	NA	Yes	-155.619	19.096056	no
C-3249	Not genotyped	Big Island	NA	NA	Yes	-155.825014	19.117381	no
C-3256	Not genotyped	Big Island	NA	NA	Yes	-155.819853	19.114972	no
C-3289	Not genotyped	Big Island	NA	NA	Yes	-155.820044	19.114761	no
C-3292	Not genotyped	Big Island	NA	NA	Yes	-155.82085	19.114289	no
C-3301	Not genotyped	Big Island	NA	NA	Yes	-154.902997	19.483211	no
C-3311	Not genotyped	Big Island	NA	NA	Yes	-154.94225	19.496769	no
C-3318	Not genotyped	Big Island	NA	NA	Yes	-154.90145	19.482678	no
C-3326	Not genotyped	Big Island	NA	NA	Yes	-154.903158	19.483425	no
C-3339	Not genotyped	Big Island	NA	NA	Yes	-155.442644	20.035433	no
C-3340	Not genotyped	Big Island	NA	NA	Yes	-155.441781	20.036878	no
C-3343	Not genotyped	Big Island	NA	NA	Yes	-155.442428	20.035983	no
C-3352	Not genotyped	Big Island	NA	NA	Yes	-155.162314	19.932164	no
C-3354	Not genotyped	Big Island	NA	NA	Yes	-154.975172	19.544039	no
C-3376	Not genotyped	Big Island	NA	NA	Yes	-155.618094	19.098025	no
C-3381	Not genotyped	Big Island	NA	NA	Yes	-154.903658	19.482756	no
C-3385	Not genotyped	Big Island	NA	NA	Yes	-154.902467	19.483889	no
C-3392	Not genotyped	Big Island	NA	NA	Yes	-155.619556	19.094808	no
C-3401	Not genotyped	Big Island	NA	NA	Yes	-154.901406	19.483347	no
C-3493	Not genotyped	Big Island	NA	NA	Yes	-155.092183	19.783583	no
C-3497	Not genotyped	Big Island	NA	NA	Yes	-155.095869	19.7931	no
C-3502	Not genotyped	Big Island	NA	NA	Yes	-155.207389	19.964367	no
C-3529	Not genotyped	Big Island	NA	NA	Yes	-155.154103	19.922539	no
C-0001	PCR -	Oahu	Unknown	0	Yes	-157.724406	21.304203	no
C-0002	PCR -	Oahu	Unknown	0	Yes	-157.724256	21.305489	no
C-0004	PCR -	Oahu	Unknown	0	Yes	-157.724203	21.306319	no
C-0006	PCR -	Oahu	Unknown	0	Yes	-157.723378	21.306356	yes
C-0007	PCR -	Oahu	Unknown	0	Yes	-157.722292	21.307472	yes
C-0009	PCR -	Oahu	Unknown	0	Yes	-157.722431	21.308419	yes
C-0012	PCR -	Oahu	Unknown	0	Yes	-157.722147	21.307931	no
C-0015	PCR -	Oahu	Unknown	0	Yes	-157.721969	21.313192	no
C-0021	PCR -	Oahu	Unknown	0	Yes	-157.723014	21.314639	yes
C-0025	PCR -	Oahu	Unknown	0	Yes	-157.857217	21.315175	no
C-0026	PCR -	Oahu	Unknown	0	Yes	-157.857536	21.315108	no
C-0028	PCR -	Oahu	Unknown	0	Yes	-157.721036	21.309397	yes
C-0032	PCR -	Oahu	Unknown	0	Yes	-157.806158	21.385961000000002	no
C-0038	PCR -	Oahu	Unknown	0	Yes	-157.721692	21.312139	yes
C-0049	PCR -	Oahu	Unknown	0	Yes	-157.723156	21.306561	no
C-0051	PCR -	Oahu	Unknown	0	Yes	-157.805756	21.359433	yes
C-0052	PCR -	Oahu	Unknown	0	Yes	-157.810692	21.353661	no
C-0057	PCR -	Oahu	Unknown	0	Yes	-157.7226	21.314214	yes
C-0061	PCR -	Oahu	Unknown	0	Yes	-157.800606	21.380164	yes
C-0062	PCR -	Oahu	Unknown	0	Yes	-157.799989	21.338567	no
C-0068	PCR -	Oahu	Unknown	0	Yes	-157.72425	21.3071	no
C-0076	PCR -	Oahu	Unknown	0	Yes	-157.78015	21.364619	yes
C-0077	PCR -	Oahu	Unknown	0	Yes	-157.780194	21.364069	no
C-0078	PCR -	Oahu	Unknown	0	Yes	-157.781025	21.364117	no
C-0087	PCR -	Oahu	Unknown	0	Yes	-158.016819	21.503733	no
C-0090	PCR -	Oahu	Unknown	0	Yes	-157.800728	21.334344	yes
C-0093	PCR -	Oahu	Unknown	0	Yes	-157.779367	21.361767	no
C-0098	PCR -	Oahu	Unknown	0	Yes	-157.857819	21.316744	no
C-0109	PCR -	Kauai	Unknown	0	Yes	-159.594825	22.198275	yes
C-0113	PCR -	Kauai	Unknown	0	Yes	-159.596983	22.205197	yes
C-0117	PCR -	Kauai	Unknown	0	Yes	-159.595983	22.211117	yes
C-0123	PCR -	Kauai	Unknown	0	Yes	-159.584722	22.219186	yes
C-0147	PCR -	Kauai	Unknown	0	Yes	-159.625719	22.148542	yes
C-0156	PCR -	Kauai	Unknown	0	Yes	-159.672317	22.106808	yes
C-0157	PCR -	Kauai	Unknown	0	Yes	-159.654611	22.132931	no
C-0158	PCR -	Kauai	Unknown	0	Yes	-159.659722	22.129519	no
C-0163	PCR -	Kauai	Unknown	0	Yes	-159.672317	22.1068	no
C-0169	PCR -	Kauai	Unknown	0	Yes	-159.609375	22.147131	no
C-0171	PCR -	Kauai	Unknown	0	Yes	-159.611914	22.146142	no
C-0173	PCR -	Kauai	Unknown	0	Yes	-159.617336	22.146903	yes
C-0188	PCR -	Kauai	Unknown	0	Yes	-159.535122	22.21465	yes
C-0189	PCR -	Kauai	Unknown	0	Yes	-159.469825	22.211489	yes
C-0190	PCR -	Kauai	Unknown	0	Yes	-159.326181	22.171433	yes
C-0192	PCR -	Kauai	Unknown	0	Yes	-159.475858	22.211278	no
C-0195	PCR -	Kauai	Unknown	0	Yes	-159.346928	22.003719	no
C-0202	PCR -	Kauai	Unknown	0	Yes	-159.585814	22.217519	no
C-0211	PCR -	Kauai	Unknown	0	Yes	-159.595944	22.203142	yes
C-0221	PCR -	Kauai	Unknown	0	Yes	-159.595147	22.201019	no
C-0224	PCR -	Kauai	Unknown	0	Yes	-159.664956	22.121633	no
C-0231	PCR -	Kauai	Unknown	0	Yes	-159.6460699	22.15107135	yes
C-0232	PCR -	Kauai	Unknown	0	Yes	-159.640055	22.14512	yes
C-0239	PCR -	Kauai	Unknown	0	Yes	-159.674272	22.094358	no
C-0242	PCR -	Kauai	Unknown	0	Yes	-159.671308	22.108408	yes
C-0245	PCR -	Kauai	Unknown	0	Yes	-159.670781	22.113936	yes
C-0255	PCR -	Kauai	Unknown	0	Yes	-159.418867	22.071869	yes
C-0260	PCR -	Kauai	Unknown	0	Yes	-159.423314	22.079544	yes
C-0262	PCR -	Kauai	Unknown	0	Yes	-159.426217	22.081506	yes
C-0263	PCR -	Kauai	Unknown	0	Yes	-159.426053	22.081378	no
C-0265	PCR -	Kauai	Unknown	0	Yes	-159.426114	22.081536	no
C-0272	PCR -	Kauai	Unknown	0	Yes	-159.413903	22.069731	no
C-0275	PCR -	Kauai	Unknown	0	Yes	-159.426214	22.081447	yes
C-0281	PCR -	Kauai	Unknown	0	Yes	-159.426189	22.081308	no
C-0282	PCR -	Kauai	Unknown	0	Yes	-159.426189	22.081308	no
C-0283	PCR -	Kauai	Unknown	0	Yes	-159.426267	22.081319	no
C-0284	PCR -	Kauai	Unknown	0	Yes	-159.426164	22.081356	no
C-0285	PCR -	Kauai	Unknown	0	Yes	-159.426103	22.081478	no
C-0286	PCR -	Kauai	Unknown	0	Yes	-159.42615	22.081408	no
C-0287	PCR -	Kauai	Unknown	0	Yes	-159.426083	22.081397	yes
C-0289	PCR -	Kauai	Unknown	0	Yes	-159.426097	22.081461	no
C-0290	PCR -	Kauai	Unknown	0	Yes	-159.426297	22.081394	no
C-0292	PCR -	Kauai	Unknown	0	Yes	-159.426011	22.081628	no
C-0293	PCR -	Kauai	Unknown	0	Yes	-159.426014	22.081589	yes
C-0297	PCR -	Kauai	Unknown	0	Yes	-159.425942	22.081622	no
C-0298	PCR -	Kauai	Unknown	0	Yes	-159.425944	22.081633	yes
C-0300	PCR -	Kauai	Unknown	0	Yes	-159.426031	22.081642	no
C-0302	PCR -	Kauai	Unknown	0	Yes	-159.474942	22.199367	no
C-0308	PCR -	Maui	Unknown	0	Yes	-156.5363	20.9486	yes
C-0312	PCR -	Maui	Unknown	0	Yes	-156.536245	20.948582	no
C-0316	PCR -	Maui	Unknown	0	Yes	-156.535883	20.948744	no
C-0331	PCR -	Maui	Unknown	0	Yes	-156.535461	20.949444	yes
C-0333	PCR -	Kauai	Unknown	0	Yes	-159.474708	22.201183	no
C-0337	PCR -	Kauai	Unknown	0	Yes	-159.475117	22.200728	no
C-0340	PCR -	Maui	Unknown	0	Yes	-156.336383	20.670197	no
C-0354	PCR -	Maui	Unknown	0	Yes	-156.533814	20.951715	no
C-0359	PCR -	Maui	Unknown	0	Yes	-156.535675	20.948678	no
C-0360	PCR -	Maui	Unknown	0	Yes	-156.339425	20.674525	no
C-0364	PCR -	Maui	Unknown	0	Yes	-156.051429	20.794097	no
C-0368	PCR -	Maui	Unknown	0	Yes	-156.073466	20.798997	no
C-0372	PCR -	Maui	Unknown	0	Yes	-156.080635	20.803007	no
C-0373	PCR -	Maui	Unknown	0	Yes	-156.332881	20.673522	no
C-0379	PCR -	Kauai	Unknown	0	Yes	-159.66019	22.131743	no
C-0390	PCR -	Kauai	Unknown	0	Yes	-159.671714	22.116089	no
C-0394	PCR -	Kauai	Unknown	0	Yes	-159.659747	22.129439	no
C-0403	PCR -	Maui	Unknown	0	Yes	-155.997712	20.770049	yes
C-0405	PCR -	Maui	Unknown	0	Yes	-156.330583	20.677	no
C-0406	PCR -	Kauai	Unknown	0	Yes	-159.660294	22.131269	no
C-0409	PCR -	Maui	Unknown	0	Yes	-156.331256	20.676817	no
C-0411	PCR -	Maui	Unknown	0	Yes	-156.030819	20.78425	yes
C-0416	PCR -	Maui	Unknown	0	Yes	-156.116768	20.8131	yes
C-0424	PCR -	Kauai	Unknown	0	Yes	-159.420817	22.074664	no
C-0426	PCR -	Kauai	Unknown	0	Yes	-159.422125	22.076611	yes
C-0428	PCR -	Kauai	Unknown	0	Yes	-159.422961	22.078697	no
C-0429	PCR -	Kauai	Unknown	0	Yes	-159.423094	22.079097	no
C-0431	PCR -	Kauai	Unknown	0	Yes	-159.423914	22.07975	no
C-0440	PCR -	Kauai	Unknown	0	Yes	-159.425275	22.080756	no
C-0444	PCR -	Kauai	Unknown	0	Yes	-159.427136	22.085308	no
C-0445	PCR -	Kauai	Unknown	0	Yes	-159.427886	22.086603	no
C-0448	PCR -	Kauai	Unknown	0	Yes	-159.4160708	22.07237328	no
C-0450	PCR -	Kauai	Unknown	0	Yes	-159.417614	22.071756	yes
C-0451	PCR -	Kauai	Unknown	0	Yes	-159.416544	22.071583	no
C-0456	PCR -	Kauai	Unknown	0	Yes	-159.601247	21.901075	yes
C-0459	PCR -	Kauai	Unknown	0	Yes	-159.658203	22.120758	no
C-0460	PCR -	Kauai	Unknown	0	Yes	-159.658	22.121408	no
C-0463	PCR -	Kauai	Unknown	0	Yes	-159.656831	22.122678	yes
C-0466	PCR -	Kauai	Unknown	0	Yes	-159.653486	22.124342	yes
C-0467	PCR -	Kauai	Unknown	0	Yes	-159.651647	22.124731	no
C-0469	PCR -	Kauai	Unknown	0	Yes	-159.655858	22.12395	yes
C-0479	PCR -	Kauai	Unknown	0	Yes	-159.664317	22.12186636	no
C-0502	PCR -	Kauai	Unknown	0	Yes	-159.6209707	22.1517887	no
C-0512	PCR -	Kauai	Unknown	0	Yes	-159.657581	22.130244	no
C-0513	PCR -	Kauai	Unknown	0	Yes	-159.677783	22.101269	no
C-0520	PCR -	Kauai	Unknown	0	Yes	-159.660439	22.131492	no
C-0523	PCR -	Kauai	Unknown	0	Yes	-159.660464	22.131497	no
C-0524	PCR -	Kauai	Unknown	0	Yes	-159.660475	22.132931	yes
C-0527	PCR -	Kauai	Unknown	0	Yes	-159.6116399	22.14598114	no
C-0531	PCR -	Kauai	Unknown	0	Yes	-159.660417	22.117706	no
C-0533	PCR -	Kauai	Unknown	0	Yes	-159.431408	22.092094	no
C-0537	PCR -	Kauai	Unknown	0	Yes	-159.660447	22.132692	yes
C-0538	PCR -	Kauai	Unknown	0	Yes	-159.660425	22.132747	no
C-0545	PCR -	Kauai	Unknown	0	Yes	-159.657808	22.130694	yes
C-0546	PCR -	Kauai	Unknown	0	Yes	-159.657831	22.130731	yes
C-0555	PCR -	Kauai	Unknown	0	Yes	-159.412764	22.086411	no
C-0558	PCR -	Kauai	Unknown	0	Yes	-159.413108	22.077467	no
C-0560	PCR -	Kauai	Unknown	0	Yes	-159.412728	22.079822	no
C-0562	PCR -	Molokai	Unknown	0	Yes	-156.965772	21.138145	no
C-0576	PCR -	Maui	Unknown	0	Yes	-156.334036	20.672492	no
C-0588	PCR -	Kauai	Unknown	0	Yes	-159.375083	21.978942	yes
C-0602	PCR -	Kauai	Unknown	0	Yes	-159.616153	22.148506	no
C-0603	PCR -	Kauai	Unknown	0	Yes	-159.611828	22.146131	yes
C-0604	PCR -	Kauai	Unknown	0	Yes	-159.611519	22.145906	no
C-0616	PCR -	Kauai	Unknown	0	Yes	-159.6143508	21.96537236	no
C-0617	PCR -	Kauai	Unknown	0	Yes	-159.6143508	21.96537236	no
C-0619	PCR -	Kauai	Unknown	0	Yes	-159.673369	22.107367	yes
C-0622	PCR -	Molokai	Unknown	0	Yes	-156.965847	21.138017	no
C-0624	PCR -	Molokai	Unknown	0	Yes	-157.005439	21.177158	no
C-0627	PCR -	Molokai	Unknown	0	Yes	-157.005517	21.176986	no
C-0637	PCR -	Molokai	Unknown	0	Yes	-157.008272	21.175628	no
C-0639	PCR -	Molokai	Unknown	0	Yes	-157.008375	21.175619	no
C-0640	PCR -	Molokai	Unknown	0	Yes	-157.008266	21.175638	no
C-0645	PCR -	Molokai	Unknown	0	Yes	-157.005756	21.177225	no
C-0650	PCR -	Kauai	Unknown	0	Yes	-159.651233	22.124942	no
C-0651	PCR -	Kauai	Unknown	0	Yes	-159.660483	22.131517	no
C-0653	PCR -	Kauai	Unknown	0	Yes	-159.660472	22.131581	no
C-0658	PCR -	Kauai	Unknown	0	Yes	-159.660425	22.131444	yes
C-0659	PCR -	Kauai	Unknown	0	Yes	-159.660469	22.131481	no
C-0674	PCR -	Kauai	Unknown	0	Yes	-159.662928	22.134392	yes
C-0676	PCR -	Kauai	Unknown	0	Yes	-159.656228	22.123297	yes
C-0678	PCR -	Kauai	Unknown	0	Yes	-159.657331	22.122489	yes
C-0679	PCR -	Kauai	Unknown	0	Yes	-159.651233	22.124969	yes
C-0680	PCR -	Kauai	Unknown	0	Yes	-159.658058	22.121489	yes
C-0682	PCR -	Kauai	Unknown	0	Yes	-159.658325	22.120481	no
C-0688	PCR -	Kauai	Unknown	0	Yes	-159.660508	22.132892	yes
C-0694	PCR -	Kauai	Unknown	0	Yes	-159.660056	22.130572	no
C-0696	PCR -	Kauai	Unknown	0	Yes	-159.417508	22.071294	yes
C-0698	PCR -	Kauai	Unknown	0	Yes	-159.417506	22.071367	yes
C-0707	PCR -	Kauai	Unknown	0	Yes	-159.674375	22.106439	no
C-0709	PCR -	Kauai	Unknown	0	Yes	-159.681669	22.118494	yes
C-0711	PCR -	Kauai	Unknown	0	Yes	-159.678925	22.117683	yes
C-0712	PCR -	Kauai	Unknown	0	Yes	-159.674861	22.114742	no
C-0713	PCR -	Kauai	Unknown	0	Yes	-159.672764	22.110806	yes
C-0715	PCR -	Kauai	Unknown	0	Yes	-159.672139	22.109094	no
C-0721	PCR -	Kauai	Unknown	0	Yes	-159.662497	22.071153	no
C-0725	PCR -	Kauai	Unknown	0	Yes	-159.672744	22.026014	no
C-0727	PCR -	Kauai	Unknown	0	Yes	-159.660425	22.131478	yes
C-0730	PCR -	Kauai	Unknown	0	Yes	-159.660325	22.130314	no
C-0739	PCR -	Kauai	Unknown	0	Yes	-159.337906	22.086706	no
C-0743	PCR -	Kauai	Unknown	0	Yes	-159.660483	22.131519	no
C-0750	PCR -	Maui	Unknown	0	Yes	-156.17982	20.87057	no
C-0753	PCR -	Kauai	Unknown	0	Yes	-159.6497521	22.12558546	yes
C-0756	PCR -	Molokai	Unknown	0	Yes	-157.008211	21.175615	no
C-0758	PCR -	Molokai	Unknown	0	Yes	-157.005256	21.177061	no
C-0759	PCR -	Molokai	Unknown	0	Yes	-157.0053879	21.1770063	no
C-0762	PCR -	Molokai	Unknown	0	Yes	-157.005667	21.177108	no
C-0764	PCR -	Molokai	Unknown	0	Yes	-157.005458	21.177017	no
C-0770	PCR -	Molokai	Unknown	0	Yes	-157.005414	21.177047	yes
C-0771	PCR -	Molokai	Unknown	0	Yes	-157.008215	21.175636	no
C-0772	PCR -	Molokai	Unknown	0	Yes	-156.998814	21.151286	no
C-0775	PCR -	Molokai	Unknown	0	Yes	-157.008133	21.175608	no
C-0779	PCR -	Molokai	Unknown	0	Yes	-157.008233	21.175639	no
C-0780	PCR -	Kauai	Unknown	0	Yes	-159.388328	22.102964	no
C-0782	PCR -	Kauai	Unknown	0	Yes	-159.426006	22.081678	no
C-0787	PCR -	Kauai	Unknown	0	Yes	-159.425983	22.081661	no
C-0788	PCR -	Kauai	Unknown	0	Yes	-159.426003	22.081647	yes
C-0791	PCR -	Kauai	Unknown	0	Yes	-159.435936	22.092892	no
C-0792	PCR -	Kauai	Unknown	0	Yes	-159.425992	22.081633	yes
C-0796	PCR -	Kauai	Unknown	0	Yes	-159.425942	22.081611	no
C-0801	PCR -	Kauai	Unknown	0	Yes	-159.430731	22.091008	no
C-0812	PCR -	Kauai	Unknown	0	Yes	-159.641442	22.149092	no
C-0817	PCR -	Kauai	Unknown	0	Yes	-159.640044	22.147711	no
C-0829	PCR -	Kauai	Unknown	0	Yes	-159.660536	22.132725	yes
C-0831	PCR -	Kauai	Unknown	0	Yes	-159.6608	22.133392	no
C-0833	PCR -	Kauai	Unknown	0	Yes	-159.650611	22.141514	no
C-0837	PCR -	Kauai	Unknown	0	Yes	-159.652872	22.142033	no
C-0840	PCR -	Kauai	Unknown	0	Yes	-159.655792	22.143853	no
C-0841	PCR -	Kauai	Unknown	0	Yes	-159.3867246	22.10248212	no
C-0847	PCR -	Kauai	Unknown	0	Yes	-159.476669	22.198492	no
C-0849	PCR -	Kauai	Unknown	0	Yes	-159.392369	22.103744	no
C-0851	PCR -	Kauai	Unknown	0	Yes	-159.476856	22.197839	no
C-0853	PCR -	Kauai	Unknown	0	Yes	-159.686314	22.119697	no
C-0854	PCR -	Kauai	Unknown	0	Yes	-159.3892	22.104125	no
C-0855	PCR -	Kauai	Unknown	0	Yes	-159.477408	22.197592	no
C-0859	PCR -	Kauai	Unknown	0	Yes	-159.477839	22.196744	yes
C-0865	PCR -	Maui	Unknown	0	Yes	-156.1798334	20.8706192	yes
C-0866	PCR -	Kauai	Unknown	0	Yes	-159.388972	22.103936	no
C-0870	PCR -	Maui	Unknown	0	Yes	-156.0758536	20.79521427	yes
C-0874	PCR -	Kauai	Unknown	0	Yes	-159.38845	22.103753	no
C-0875	PCR -	Kauai	Unknown	0	Yes	-159.3573668	22.04649654	no
C-0876	PCR -	Maui	Unknown	0	Yes	-156.0758536	20.79521364	no
C-0879	PCR -	Kauai	Unknown	0	Yes	-159.357803	22.046483	yes
C-0884	PCR -	Maui	Unknown	0	Yes	-156.243129	20.912386	no
C-0891	PCR -	Kauai	Unknown	0	Yes	-159.360589	22.042781	yes
C-0898	PCR -	Kauai	Unknown	0	Yes	-159.474839	22.199936	no
C-0906	PCR -	Kauai	Unknown	0	Yes	-159.392406	22.087617	yes
C-0907	PCR -	Kauai	Unknown	0	Yes	-159.477886	22.196469	no
C-0909	PCR -	Maui	Unknown	0	Yes	-156.11988	20.814048	no
C-0910	PCR -	Kauai	Unknown	0	Yes	-159.392383	22.087667	no
C-0911	PCR -	Kauai	Unknown	0	Yes	-159.47835	22.1947	no
C-0912	PCR -	Maui	Unknown	0	Yes	-156.1857636	20.874467	no
C-0916	PCR -	Kauai	Unknown	0	Yes	-159.477386	22.197636	no
C-0919	PCR -	Kauai	Unknown	0	Yes	-159.478489	22.194631	yes
C-0922	PCR -	Kauai	Unknown	0	Yes	-159.391661	22.086658	no
C-0926	PCR -	Kauai	Unknown	0	Yes	-159.390886	22.086197	no
C-0930	PCR -	Kauai	Unknown	0	Yes	-159.390214	22.085631	no
C-0932	PCR -	Kauai	Unknown	0	Yes	-159.47795	22.195531	no
C-0937	PCR -	Kauai	Unknown	0	Yes	-159.478633	22.194325	yes
C-0939	PCR -	Maui	Unknown	0	Yes	-156.0758536	20.79521364	no
C-0942	PCR -	Kauai	Unknown	0	Yes	-159.389292	22.085553	yes
C-0945	PCR -	Kauai	Unknown	0	Yes	-159.387539	22.085269	no
C-0950	PCR -	Kauai	Unknown	0	Yes	-159.478586	22.194369	no
C-0954	PCR -	Kauai	Unknown	0	Yes	-159.478606	22.194394	yes
C-0966	PCR -	Kauai	Unknown	0	Yes	-159.690431	22.122058	no
C-0973	PCR -	Kauai	Unknown	0	Yes	-159.681722	22.118553	no
C-0980	PCR -	Kauai	Unknown	0	Yes	-159.479011	22.192867	no
C-0983	PCR -	Kauai	Unknown	0	Yes	-159.676703	22.098633	yes
C-0986	PCR -	Kauai	Unknown	0	Yes	-159.478586	22.194386	yes
C-0990	PCR -	Kauai	Unknown	0	Yes	-159.478589	22.194358	no
C-0991	PCR -	Kauai	Unknown	0	Yes	-159.664394	22.121917	no
C-0996	PCR -	Kauai	Unknown	0	Yes	-159.479192	22.192269	no
C-1008	PCR -	Kauai	Unknown	0	Yes	-159.479233	22.192208	no
C-1010	PCR -	Kauai	Unknown	0	Yes	-159.390764	22.086169	no
C-1012	PCR -	Kauai	Unknown	0	Yes	-159.479417	22.191911	no
C-1022	PCR -	Kauai	Unknown	0	Yes	-159.436481	22.092953	no
C-1024	PCR -	Kauai	Unknown	0	Yes	-159.426103	22.082331	no
C-1034	PCR -	Kauai	Unknown	0	Yes	-159.426456	22.088514	no
C-1037	PCR -	Kauai	Unknown	0	Yes	-159.433019	22.092786	no
C-1045	PCR -	Kauai	Unknown	0	Yes	-159.389006	22.104164	yes
C-1053	PCR -	Kauai	Unknown	0	Yes	-159.392339	22.103703	no
C-1056	PCR -	Maui	Unknown	0	Yes	-156.523303	20.878214	no
C-1061	PCR -	Kauai	Unknown	0	Yes	-159.660528	22.131542	no
C-1066	PCR -	Kauai	Unknown	0	Yes	-159.408808	22.052375	yes
C-1067	PCR -	Kauai	Unknown	0	Yes	-159.417481	22.071367	no
C-1069	PCR -	Kauai	Unknown	0	Yes	-159.417508	22.071381	yes
C-1072	PCR -	Kauai	Unknown	0	Yes	-159.389136	22.007644	yes
C-1075	PCR -	Kauai	Unknown	0	Yes	-159.414844	22.074047	no
C-1076	PCR -	Kauai	Unknown	0	Yes	-159.4143523	22.0755141	no
C-1084	PCR -	Kauai	Unknown	0	Yes	-159.478914	22.193308	no
C-1086	PCR -	Kauai	Unknown	0	Yes	-159.478906	22.192403	no
C-1087	PCR -	Kauai	Unknown	0	Yes	-159.480375	22.190942	yes
C-1091	PCR -	Kauai	Unknown	0	Yes	-159.472756	22.201458	yes
C-1108	PCR -	Maui	Unknown	0	Yes	-156.515519	20.881944	no
C-1110	PCR -	Maui	Unknown	0	Yes	-156.516547	20.881375	no
C-1115	PCR -	Maui	Unknown	0	Yes	-156.535475	20.949033	yes
C-1125	PCR -	Kauai	Unknown	0	Yes	-159.478564	22.194414	yes
C-1126	PCR -	Maui	Unknown	0	Yes	-156.536444	20.948897	no
C-1129	PCR -	Kauai	Unknown	0	Yes	-159.478628	22.194378	no
C-1130	PCR -	Maui	Unknown	0	Yes	-156.534914	20.950136	no
C-1134	PCR -	Maui	Unknown	0	Yes	-156.535508	20.949254	no
C-1141	PCR -	Maui	Unknown	0	Yes	-156.53625	20.94853	no
C-1144	PCR -	Kauai	Unknown	0	Yes	-159.657306	22.130783	no
C-1147	PCR -	Kauai	Unknown	0	Yes	-159.6520226	22.12468042	no
C-1149	PCR -	Maui	Unknown	0	Yes	-156.536892	20.94975	no
C-1151	PCR -	Kauai	Unknown	0	Yes	-159.657189	22.130964	no
C-1160	PCR -	Kauai	Unknown	0	Yes	-159.655486	22.1241	no
C-1171	PCR -	Kauai	Unknown	0	Yes	-159.656089	22.123567	no
C-1179	PCR -	Kauai	Unknown	0	Yes	-159.656844	22.122822	no
C-1182	PCR -	Kauai	Unknown	0	Yes	-159.656833	22.122903	yes
C-1190	PCR -	Kauai	Unknown	0	Yes	-159.657144	22.122583	yes
C-1191	PCR -	Kauai	Unknown	0	Yes	-159.657847	22.130219	no
C-1192	PCR -	Maui	Unknown	0	Yes	-156.338428	20.675686	no
C-1202	PCR -	Maui	Unknown	0	Yes	-156.0650423	20.78352803	yes
C-1203	PCR -	Maui	Unknown	0	Yes	-156.51148	20.899045	no
C-1206	PCR -	Maui	Unknown	0	Yes	-156.0650423	20.78352803	no
C-1209	PCR -	Maui	Unknown	0	Yes	-156.0650423	20.78352803	no
C-1211	PCR -	Maui	Unknown	0	Yes	-156.520422	20.879108	no
C-1214	PCR -	Maui	Unknown	0	Yes	-156.0650423	20.78352803	no
C-1221	PCR -	Maui	Unknown	0	Yes	-156.0650423	20.78352803	no
C-1222	PCR -	Maui	Unknown	0	Yes	-156.0650423	20.78352803	no
C-1225	PCR -	Maui	Unknown	0	Yes	-156.0650423	20.78352803	no
C-1226	PCR -	Maui	Unknown	0	Yes	-156.1200481	20.83336165	no
C-1229	PCR -	Maui	Unknown	0	Yes	-156.0650423	20.78352803	yes
C-1230	PCR -	Maui	Unknown	0	Yes	-156.1199253	20.8331329	yes
C-1234	PCR -	Maui	Unknown	0	Yes	-156.1200481	20.83336165	no
C-1239	PCR -	Maui	Unknown	0	Yes	-156.518349	20.880395	no
C-1241	PCR -	Maui	Unknown	0	Yes	-156.0650423	20.78352803	no
C-1242	PCR -	Maui	Unknown	0	Yes	-156.14023	20.840456	no
C-1254	PCR -	Maui	Unknown	0	Yes	-156.520339	20.878843	no
C-1257	PCR -	Maui	Unknown	0	Yes	-156.0650423	20.78352803	yes
C-1279	PCR -	Maui	Unknown	0	Yes	-156.304244	20.723331	no
C-1289	PCR -	Kauai	Unknown	0	Yes	-159.657286	22.130642	no
C-1298	PCR -	Kauai	Unknown	0	Yes	-159.656617	22.123028	no
C-1300	PCR -	Kauai	Unknown	0	Yes	-159.656669	22.122772	no
C-1304	PCR -	Kauai	Unknown	0	Yes	-159.656264	22.123431	no
C-1319	PCR -	Maui	Unknown	0	Yes	-156.237814	20.767981	no
C-1328	PCR -	Maui	Unknown	0	Yes	-156.2371	20.767736	no
C-1342	PCR -	Molokai	Unknown	0	Yes	-156.965931	21.138065	no
C-1362	PCR -	Molokai	Unknown	0	Yes	-156.965889	21.138045	yes
C-1373	PCR -	Maui	Unknown	0	Yes	-156.331811	20.683617	no
C-1378	PCR -	Molokai	Unknown	0	Yes	-156.965892	21.138014	no
C-1384	PCR -	Maui	Unknown	0	Yes	-156.045903	20.663831	no
C-1386	PCR -	Maui	Unknown	0	Yes	-156.045942	20.663992	yes
C-1387	PCR -	Maui	Unknown	0	Yes	-156.046092	20.6639	yes
C-1390	PCR -	Maui	Unknown	0	Yes	-156.047503	20.664328	no
C-1394	PCR -	Maui	Unknown	0	Yes	-156.048592	20.664939	yes
C-1395	PCR -	Maui	Unknown	0	Yes	-156.048917	20.66495	no
C-1400	PCR -	Maui	Unknown	0	Yes	-156.05085	20.665261	no
C-1405	PCR -	Maui	Unknown	0	Yes	-156.051453	20.667172	yes
C-1407	PCR -	Maui	Unknown	0	Yes	-156.052225	20.667989	no
C-1477	PCR -	Maui	Unknown	0	Yes	-156.322944	20.741641	no
C-1500	PCR -	Maui	Unknown	0	Yes	-156.323751	20.74169	yes
C-1506	PCR -	Maui	Unknown	0	Yes	-155.7052173	19.92253451	no
C-1509	PCR -	Maui	Unknown	0	Yes	-156.030313	20.678003	no
C-1511	PCR -	Maui	Unknown	0	Yes	-156.048911	20.6648	no
C-1515	PCR -	Maui	Unknown	0	Yes	-156.04905	20.664921	no
C-1517	PCR -	Maui	Unknown	0	Yes	-156.049025	20.664919	yes
C-1523	PCR -	Maui	Unknown	0	Yes	-156.04903	20.66489	yes
C-1527	PCR -	Maui	Unknown	0	Yes	-156.030505	20.683003	no
C-1530	PCR -	Maui	Unknown	0	Yes	-156.021999	20.683802	no
C-2521	PCR -	Maui	Unknown	0	Yes	-156.2359704	20.76105449	no
C-2522	PCR -	Maui	Unknown	0	Yes	-156.056539	20.672739	yes
C-2533	PCR -	Maui	Unknown	0	Yes	-156.056892	20.674472	no
C-2537	PCR -	Maui	Unknown	0	Yes	-156.052225	20.667989	no
C-2539	PCR -	Maui	Unknown	0	Yes	-156.193933	20.875489	no
C-2545	PCR -	Maui	Unknown	0	Yes	-156.053583	20.669836	yes
C-2547	PCR -	Maui	Unknown	0	Yes	-156.299233	20.886717	yes
C-2553	PCR -	Maui	Unknown	0	Yes	-156.053875	20.670456	yes
C-2558	PCR -	Maui	Unknown	0	Yes	-156.0795	20.651194	yes
C-2581	PCR -	Maui	Unknown	0	Yes	-156.056783	20.674533	no
C-2582	PCR -	Maui	Unknown	0	Yes	-156.056339	20.675025	no
C-2584	PCR -	Maui	Unknown	0	Yes	-156.056547	20.675492	no
C-2591	PCR -	Maui	Unknown	0	Yes	-155.74039200000001	20.130853	no
C-2593	PCR -	Maui	Unknown	0	Yes	-156.049008	20.664903	yes
C-2601	PCR -	Maui	Unknown	0	Yes	-156.049042	20.664844	no
C-2603	PCR -	Maui	Unknown	0	Yes	-156.049008	20.664903	no
C-2607	PCR -	Maui	Unknown	0	Yes	-156.125529	20.816587	no
C-2610	PCR -	Maui	Unknown	0	Yes	-156.125229	20.817026	no
C-2612	PCR -	Maui	Unknown	0	Yes	-156.129383	20.818472	no
C-2627	PCR -	Maui	Unknown	0	Yes	-156.278061	20.805685	no
C-2641	PCR -	Kauai	Unknown	0	Yes	-159.661106	22.048758	yes
C-2642	PCR -	Kauai	Unknown	0	Yes	-159.661131	22.048808	no
C-2644	PCR -	Kauai	Unknown	0	Yes	-159.658661	22.049594	yes
C-2647	PCR -	Kauai	Unknown	0	Yes	-159.676614	22.098633	no
C-2648	PCR -	Kauai	Unknown	0	Yes	-159.665767	22.120058	no
C-2662	PCR -	Kauai	Unknown	0	Yes	-159.6645	22.121989	no
C-2663	PCR -	Kauai	Unknown	0	Yes	-159.664508	22.124425	yes
C-2672	PCR -	Big Island	Unknown	0	Yes	-155.231392	19.397197	yes
C-2680	PCR -	Big Island	Unknown	0	Yes	-155.231844	19.398425	no
C-2684	PCR -	Big Island	Unknown	0	Yes	-155.232181	19.399503	no
C-2694	PCR -	Big Island	Unknown	0	Yes	-155.222725	19.384208	no
C-2696	PCR -	Big Island	Unknown	0	Yes	-155.142589	19.900414	no
C-2698	PCR -	Big Island	Unknown	0	Yes	-155.220878	19.381706	no
C-2703	PCR -	Kauai	Unknown	0	Yes	-159.660444	22.132803	yes
C-2714	PCR -	Kauai	Unknown	0	Yes	-159.650711	22.125064	no
C-2719	PCR -	Kauai	Unknown	0	Yes	-159.651636	22.124794	no
C-2727	PCR -	Kauai	Unknown	0	Yes	-159.6532	22.124303	no
C-2728	PCR -	Big Island	Unknown	0	Yes	-155.949456	19.719047	no
C-2729	PCR -	Kauai	Unknown	0	Yes	-159.660228	22.131867	no
C-2737	PCR -	Kauai	Unknown	0	Yes	-159.650647	22.125169	yes
C-2738	PCR -	Kauai	Unknown	0	Yes	-159.651944	22.1247	no
C-2739	PCR -	Big Island	Unknown	0	Yes	-155.949206	19.719006	no
C-2742	PCR -	Kauai	Unknown	0	Yes	-159.660272	22.130697	no
C-2744	PCR -	Big Island	Unknown	0	Yes	-155.948836	19.718725	no
C-2745	PCR -	Kauai	Unknown	0	Yes	-159.6602799	22.13247618	no
C-2752	PCR -	Big Island	Unknown	0	Yes	-155.948731	19.718247	no
C-2753	PCR -	Kauai	Unknown	0	Yes	-159.654489	22.124483	no
C-2757	PCR -	Kauai	Unknown	0	Yes	-159.655283	22.124367	no
C-2759	PCR -	Big Island	Unknown	0	Yes	-155.303933	19.439256	no
C-2760	PCR -	Big Island	Unknown	0	Yes	-155.926672	19.532978	no
C-2761	PCR -	Big Island	Unknown	0	Yes	-155.444072	20.040528	no
C-2763	PCR -	Big Island	Unknown	0	Yes	-155.139414	19.905247	no
C-2766	PCR -	Big Island	Unknown	0	Yes	-155.299875	20.013919	no
C-2769	PCR -	Big Island	Unknown	0	Yes	-155.140617	19.903972	yes
C-2770	PCR -	Big Island	Unknown	0	Yes	-155.441383	20.036192	yes
C-2771	PCR -	Big Island	Unknown	0	Yes	-155.198158	19.951597	no
C-2775	PCR -	Big Island	Unknown	0	Yes	-155.441667	20.036897	no
C-2776	PCR -	Big Island	Unknown	0	Yes	-155.441706	20.036847	no
C-2777	PCR -	Big Island	Unknown	0	Yes	-155.441722	20.036956	no
C-2778	PCR -	Big Island	Unknown	0	Yes	-155.441764	20.0369	no
C-2779	PCR -	Big Island	Unknown	0	Yes	-155.441725	20.036858	no
C-2780	PCR -	Big Island	Unknown	0	Yes	-155.441736	20.036947	no
C-2782	PCR -	Big Island	Unknown	0	Yes	-155.441711	20.036925	yes
C-2783	PCR -	Big Island	Unknown	0	Yes	-155.441717	20.036894	yes
C-2787	PCR -	Big Island	Unknown	0	Yes	-155.616267	19.07465	no
C-2790	PCR -	Big Island	Unknown	0	Yes	-155.62243900000001	19.086456	yes
C-2791	PCR -	Big Island	Unknown	0	Yes	-155.622406	19.086289	no
C-2798	PCR -	Big Island	Unknown	0	Yes	-155.244608	19.385458	yes
C-2803	PCR -	Big Island	Unknown	0	Yes	-155.224556	19.355614	no
C-2804	PCR -	Big Island	Unknown	0	Yes	-155.224792	19.355622	yes
C-2811	PCR -	Big Island	Unknown	0	Yes	-155.222047	19.424447	no
C-2812	PCR -	Big Island	Unknown	0	Yes	-155.222514	19.4239	no
C-2821	PCR -	Big Island	Unknown	0	Yes	-155.152797	19.85395	no
C-2822	PCR -	Big Island	Unknown	0	Yes	-155.372606	19.670683	yes
C-2831	PCR -	Big Island	Unknown	0	Yes	-155.111567	19.716389	no
C-2839	PCR -	Big Island	Unknown	0	Yes	-155.109258	19.719019	no
C-2841	PCR -	Big Island	Unknown	0	Yes	-155.067156	19.589572	no
C-2843	PCR -	Big Island	Unknown	0	Yes	-155.109531	19.718786	no
C-2844	PCR -	Big Island	Unknown	0	Yes	-155.441597	20.039903	yes
C-2848	PCR -	Big Island	Unknown	0	Yes	-155.439453	20.035322	yes
C-2866	PCR -	Big Island	Unknown	0	Yes	-155.152611	19.853825	yes
C-2870	PCR -	Big Island	Unknown	0	Yes	-155.138131	19.715292	no
C-2875	PCR -	Big Island	Unknown	0	Yes	-155.441594	20.039903	yes
C-2883	PCR -	Big Island	Unknown	0	Yes	-155.153981	19.853722	yes
C-2885	PCR -	Big Island	Unknown	0	Yes	-155.067933	19.590603	no
C-2887	PCR -	Big Island	Unknown	0	Yes	-155.109931	19.719067	no
C-2888	PCR -	Big Island	Unknown	0	Yes	-155.109714	19.718956	no
C-2889	PCR -	Big Island	Unknown	0	Yes	-155.110006	19.719228	no
C-2890	PCR -	Big Island	Unknown	0	Yes	-155.4385833	20.03994662	no
C-2892	PCR -	Big Island	Unknown	0	Yes	-155.438967	20.038953	no
C-2894	PCR -	Big Island	Unknown	0	Yes	-155.439617	20.039972	no
C-2898	PCR -	Big Island	Unknown	0	Yes	-155.443011	20.040489	no
C-2902	PCR -	Big Island	Unknown	0	Yes	-155.441119	20.038728	no
C-2903	PCR -	Big Island	Unknown	0	Yes	-155.152342	19.853806	no
C-2904	PCR -	Big Island	Unknown	0	Yes	-155.109539	19.718725	no
C-2907	PCR -	Big Island	Unknown	0	Yes	-155.142581	19.900372	no
C-2910	PCR -	Big Island	Unknown	0	Yes	-155.142383	19.900869	no
C-2912	PCR -	Big Island	Unknown	0	Yes	-155.439711	20.038128	no
C-2918	PCR -	Big Island	Unknown	0	Yes	-155.821683	19.113628	no
C-2921	PCR -	Big Island	Unknown	0	Yes	-155.824211	19.110778	no
C-2922	PCR -	Big Island	Unknown	0	Yes	-155.877219	19.240583	yes
C-2924	PCR -	Big Island	Unknown	0	Yes	-155.675622	19.058319	no
C-2925	PCR -	Big Island	Unknown	0	Yes	-155.6644	19.076836	no
C-2926	PCR -	Big Island	Unknown	0	Yes	-155.664203	19.069775	no
C-2927	PCR -	Big Island	Unknown	0	Yes	-155.675572	19.058331	no
C-2930	PCR -	Big Island	Unknown	0	Yes	-155.505167	19.136539	yes
C-2933	PCR -	Big Island	Unknown	0	Yes	-155.478036	19.1899	yes
C-2936	PCR -	Big Island	Unknown	0	Yes	-155.454725	19.230772	no
C-2938	PCR -	Big Island	Unknown	0	Yes	-155.304797	19.441319	yes
C-2939	PCR -	Big Island	Unknown	0	Yes	-155.303986	19.442467	no
C-2942	PCR -	Big Island	Unknown	0	Yes	-155.236528	19.409681	no
C-2944	PCR -	Big Island	Unknown	0	Yes	-155.233478	19.402764	no
C-2945	PCR -	Big Island	Unknown	0	Yes	-155.235603	19.407444	no
C-2951	PCR -	Big Island	Unknown	0	Yes	-155.233983	19.403756	no
C-2955	PCR -	Big Island	Unknown	0	Yes	-155.233558	19.402747	no
C-2958	PCR -	Big Island	Unknown	0	Yes	-155.2377	19.411608	no
C-2962	PCR -	Big Island	Unknown	0	Yes	-155.222475	19.423861	no
C-2965	PCR -	Big Island	Unknown	0	Yes	-155.069497	19.590111	no
C-2969	PCR -	Big Island	Unknown	0	Yes	-155.069483	19.590397	no
C-2971	PCR -	Big Island	Unknown	0	Yes	-155.06835	19.590639	no
C-2972	PCR -	Big Island	Unknown	0	Yes	-155.068531	19.590497	yes
C-2973	PCR -	Big Island	Unknown	0	Yes	-155.068083	19.589469	no
C-2977	PCR -	Big Island	Unknown	0	Yes	-155.183867	19.437364	no
C-2978	PCR -	Big Island	Unknown	0	Yes	-155.154886	19.450744	no
C-2983	PCR -	Big Island	Unknown	0	Yes	-155.948603	19.720222	no
C-2984	PCR -	Big Island	Unknown	0	Yes	-155.948619	19.7196	no
C-2985	PCR -	Big Island	Unknown	0	Yes	-155.068097	19.589258	no
C-2987	PCR -	Big Island	Unknown	0	Yes	-155.440103	20.039442	no
C-2988	PCR -	Big Island	Unknown	0	Yes	-155.439844	20.039894	no
C-2990	PCR -	Big Island	Unknown	0	Yes	-155.440219	20.039333	no
C-2991	PCR -	Big Island	Unknown	0	Yes	-155.819586	19.120694	no
C-2992	PCR -	Big Island	Unknown	0	Yes	-155.615986	19.077331	no
C-2994	PCR -	Big Island	Unknown	0	Yes	-155.237583	19.453956	no
C-2997	PCR -	Big Island	Unknown	0	Yes	-155.236761	19.451875	yes
C-3011	PCR -	Big Island	Unknown	0	Yes	-155.260475	19.428344	no
C-3018	PCR -	Big Island	Unknown	0	Yes	-155.304867	19.440983	no
C-3019	PCR -	Big Island	Unknown	0	Yes	-155.304522	19.442058	no
C-3021	PCR -	Big Island	Unknown	0	Yes	-155.303869	19.442561	no
C-3022	PCR -	Big Island	Unknown	0	Yes	-155.301147	19.441847	yes
C-3027	PCR -	Big Island	Unknown	0	Yes	-155.0694	19.590139	no
C-3048	PCR -	Big Island	Unknown	0	Yes	-155.22215	19.424228	no
C-3061	PCR -	Big Island	Unknown	0	Yes	-155.136	19.460975	no
C-3062	PCR -	Big Island	Unknown	0	Yes	-155.529783	20.047947	no
C-3063	PCR -	Big Island	Unknown	0	Yes	-155.443358	20.040592	no
C-3070	PCR -	Big Island	Unknown	0	Yes	-155.672431	20.020372	no
C-3071	PCR -	Big Island	Unknown	0	Yes	-155.442814	20.040364	no
C-3074	PCR -	Big Island	Unknown	0	Yes	-155.6728	20.019769	yes
C-3075	PCR -	Big Island	Unknown	0	Yes	-155.443758	20.040758	no
C-3078	PCR -	Big Island	Unknown	0	Yes	-155.672389	20.020239	no
C-3082	PCR -	Big Island	Unknown	0	Yes	-155.672422	20.020125	yes
C-3083	PCR -	Big Island	Unknown	0	Yes	-155.439697	20.040075	no
C-3088	PCR -	Big Island	Unknown	0	Yes	-155.237386	19.4538	no
C-3099	PCR -	Big Island	Unknown	0	Yes	-155.438008	20.039544	no
C-3102	PCR -	Big Island	Unknown	0	Yes	-155.665764	20.026892	no
C-3103	PCR -	Big Island	Unknown	0	Yes	-155.438494	20.039914	yes
C-3107	PCR -	Big Island	Unknown	0	Yes	-155.4386264	20.03989746	yes
C-3108	PCR -	Big Island	Unknown	0	Yes	-155.441142	20.036014	no
C-3115	PCR -	Big Island	Unknown	0	Yes	-155.438328	20.039814	no
C-3120	PCR -	Big Island	Unknown	0	Yes	-155.308428	19.4406	no
C-3122	PCR -	Big Island	Unknown	0	Yes	-155.439544	20.038614	yes
C-3128	PCR -	Big Island	Unknown	0	Yes	-155.135178	19.9044	yes
C-3130	PCR -	Big Island	Unknown	0	Yes	-155.818417	19.115375	no
C-3131	PCR -	Big Island	Unknown	0	Yes	-155.4382309	20.03954228	no
C-3134	PCR -	Big Island	Unknown	0	Yes	-155.820208	19.118022	no
C-3136	PCR -	Big Island	Unknown	0	Yes	-155.135403	19.905633	no
C-3138	PCR -	Big Island	Unknown	0	Yes	-155.822742	19.112836	no
C-3147	PCR -	Big Island	Unknown	0	Yes	-155.441533	20.039908	yes
C-3148	PCR -	Big Island	Unknown	0	Yes	-155.439547	20.039814	no
C-3149	PCR -	Big Island	Unknown	0	Yes	-155.820464	19.114283	no
C-3150	PCR -	Big Island	Unknown	0	Yes	-155.823772	19.111353	no
C-3152	PCR -	Big Island	Unknown	0	Yes	-155.440214	20.039492	no
C-3153	PCR -	Big Island	Unknown	0	Yes	-155.820189	19.114519	no
C-3154	PCR -	Big Island	Unknown	0	Yes	-155.823078	19.112006	no
C-3156	PCR -	Big Island	Unknown	0	Yes	-155.441103	20.039653	no
C-3158	PCR -	Big Island	Unknown	0	Yes	-155.825439	19.109686	no
C-3159	PCR -	Big Island	Unknown	0	Yes	-155.134092	19.904333	no
C-3162	PCR -	Big Island	Unknown	0	Yes	-155.438306	20.038747	no
C-3167	PCR -	Big Island	Unknown	0	Yes	-155.1353304	19.90428456	no
C-3169	PCR -	Big Island	Unknown	0	Yes	-155.819531	19.120281	no
C-3171	PCR -	Big Island	Unknown	0	Yes	-155.440983	20.038256	no
C-3174	PCR -	Big Island	Unknown	0	Yes	-155.43805	20.039314	no
C-3176	PCR -	Big Island	Unknown	0	Yes	-155.134039	19.904164	no
C-3177	PCR -	Big Island	Unknown	0	Yes	-155.821697	19.113553	yes
C-3179	PCR -	Big Island	Unknown	0	Yes	-155.1362911	19.90386886	yes
C-3180	PCR -	Big Island	Unknown	0	Yes	-155.136122	19.905881	no
C-3188	PCR -	Big Island	Unknown	0	Yes	-155.239803	19.425622	no
C-3193	PCR -	Big Island	Unknown	0	Yes	-155.441525	20.039886	yes
C-3194	PCR -	Big Island	Unknown	0	Yes	-155.821111	19.114036	no
C-3200	PCR -	Big Island	Unknown	0	Yes	-155.2025006	19.44769089	no
C-3203	PCR -	Big Island	Unknown	0	Yes	-155.187017	19.443194	no
C-3208	PCR -	Big Island	Unknown	0	Yes	-155.440503	20.035578	yes
C-3209	PCR -	Big Island	Unknown	0	Yes	-155.441431	20.039806	no
C-3212	PCR -	Big Island	Unknown	0	Yes	-155.440914	20.03595	no
C-3224	PCR -	Big Island	Unknown	0	Yes	-155.196806	19.447278	no
C-3228	PCR -	Big Island	Unknown	0	Yes	-155.202586	19.447561	yes
C-3230	PCR -	Big Island	Unknown	0	Yes	-155.619303	19.09555	no
C-3242	PCR -	Big Island	Unknown	0	Yes	-155.819667	19.115178	no
C-3243	PCR -	Big Island	Unknown	0	Yes	-155.825319	19.117303	no
C-3248	PCR -	Big Island	Unknown	0	Yes	-155.820867	19.114294	no
C-3250	PCR -	Big Island	Unknown	0	Yes	-155.820417	19.118472	no
C-3251	PCR -	Big Island	Unknown	0	Yes	-155.819622	19.120367	no
C-3254	PCR -	Big Island	Unknown	0	Yes	-155.819633	19.120025	no
C-3260	PCR -	Big Island	Unknown	0	Yes	-155.818589	19.116078	no
C-3265	PCR -	Big Island	Unknown	0	Yes	-155.823253	19.118622	no
C-3272	PCR -	Big Island	Unknown	0	Yes	-155.965508	19.702831	no
C-3274	PCR -	Big Island	Unknown	0	Yes	-155.818561	19.115431	no
C-3277	PCR -	Big Island	Unknown	0	Yes	-155.821197	19.120069	yes
C-3281	PCR -	Big Island	Unknown	0	Yes	-155.82135	19.119933	no
C-3282	PCR -	Big Island	Unknown	0	Yes	-155.819947	19.118875	no
C-3286	PCR -	Big Island	Unknown	0	Yes	-155.819658	19.120197	yes
C-3287	PCR -	Big Island	Unknown	0	Yes	-155.819586	19.1151	yes
C-3288	PCR -	Big Island	Unknown	0	Yes	-155.619769	19.094333	no
C-3290	PCR -	Big Island	Unknown	0	Yes	-155.821628	19.119617	no
C-3299	PCR -	Big Island	Unknown	0	Yes	-155.818544	19.116022	no
C-3304	PCR -	Big Island	Unknown	0	Yes	-155.441736	20.036883	yes
C-3307	PCR -	Big Island	Unknown	0	Yes	-155.069594	19.725256	no
C-3312	PCR -	Big Island	Unknown	0	Yes	-155.441697	20.036886	no
C-3315	PCR -	Big Island	Unknown	0	Yes	-155.068353	19.726106	no
C-3317	PCR -	Big Island	Unknown	0	Yes	-155.069197	19.726958	no
C-3319	PCR -	Big Island	Unknown	0	Yes	-155.068858	19.725811	yes
C-3320	PCR -	Big Island	Unknown	0	Yes	-155.441717	20.036861	no
C-3322	PCR -	Big Island	Unknown	0	Yes	-154.901742	19.483044	no
C-3324	PCR -	Big Island	Unknown	0	Yes	-155.441711	20.036894	no
C-3325	PCR -	Big Island	Unknown	0	Yes	-155.068792	19.725961	yes
C-3330	PCR -	Big Island	Unknown	0	Yes	-154.902975	19.483547	no
C-3333	PCR -	Big Island	Unknown	0	Yes	-154.903303	19.482872	no
[truncated: 264 more rows]
