# Supplementary material for: Deep sampling of Hawaiian Caenorhabditis elegans reveals high genetic diversity and admixture with global populations
Source: eLife journal article supplement (doi:10.7554/elife.50465), 2019-12-03
Supplement: supp [file elife-50465-supp-v1.zip › elife_poa_e50465_Figure_2_source_data_1.csv]

fixed_substrate	worm_per_substrate	total_substrates	perc_worm_sub	plot_type
Invertebrate	4	36	11.11111111111111	PCR -
Invertebrate	1	36	2.7777777777777777	Not genotyped
Invertebrate	31	36	86.11111111111111	No nematode
Vegetation	3	82	3.6585365853658534	Caenorhabditis
Vegetation	4	82	4.878048780487805	Other PCR +
Vegetation	20	82	24.390243902439025	PCR -
Vegetation	13	82	15.853658536585366	Not genotyped
Vegetation	12	82	14.634146341463413	Tracks only
Vegetation	30	82	36.58536585365854	No nematode
Fungus	5	122	4.098360655737705	Caenorhabditis
Fungus	1	122	0.819672131147541	Other PCR +
Fungus	23	122	18.852459016393443	PCR -
Fungus	14	122	11.475409836065573	Not genotyped
Fungus	25	122	20.491803278688526	Tracks only
Fungus	54	122	44.26229508196721	No nematode
Flower	40	202	19.801980198019802	Caenorhabditis
Flower	1	202	0.49504950495049505	Other PCR +
Flower	23	202	11.386138613861387	PCR -
Flower	16	202	7.920792079207921	Not genotyped
Flower	18	202	8.91089108910891	Tracks only
Flower	104	202	51.48514851485149	No nematode
Fruit	33	327	10.091743119266056	Caenorhabditis
Fruit	6	327	1.834862385321101	Other PCR +
Fruit	44	327	13.455657492354739	PCR -
Fruit	43	327	13.149847094801222	Not genotyped
Fruit	30	327	9.174311926605505	Tracks only
Fruit	171	327	52.293577981651374	No nematode
Leaf litter	76	1494	5.087014725568943	Caenorhabditis
Leaf litter	60	1494	4.016064257028113	Other PCR +
Leaf litter	484	1494	32.396251673360105	PCR -
Leaf litter	206	1494	13.788487282463185	Not genotyped
Leaf litter	346	1494	23.15930388219545	Tracks only
Leaf litter	322	1494	21.5528781793842	No nematode
