# Supplementary material for: Deep sampling of Hawaiian Caenorhabditis elegans reveals high genetic diversity and admixture with global populations
Source: eLife journal article supplement (doi:10.7554/elife.50465), 2019-12-03
Supplement: supp [file elife-50465-supp-v1.zip › elife_poa_e50465_Figure_2_source_data_2.csv]

species_family	fixed_substrate	perc_worm_sub2
C. elegans	Vegetation	1.2048192771084338
C. tropicalis	Vegetation	1.2048192771084338
C. briggsae	Vegetation	1.2048192771084338
C. briggsae	Fungus	4.098360655737705
C. elegans	Fruit	3.669724770642202
C. oiwi	Fruit	0.9174311926605505
C. tropicalis	Fruit	1.2232415902140672
C. briggsae	Fruit	4.281345565749235
C. elegans	Flower	1.9801980198019802
C. oiwi	Flower	4.455445544554455
C. tropicalis	Flower	2.4752475247524752
C. briggsae	Flower	10.396039603960396
C. elegans	Leaf litter	1.406563965170797
C. tropicalis	Leaf litter	0.20093770931011384
C. briggsae	Leaf litter	3.415941058271936
C. tropicalis	Fungus	0
C. oiwi	Vegetation	0
C. oiwi	Leaf litter	0
C. oiwi	Fungus	0
C. elegans	Fungus	0
