# Supplementary material for: Deep sampling of Hawaiian Caenorhabditis elegans reveals high genetic diversity and admixture with global populations
Source: eLife journal article supplement (doi:10.7554/elife.50465), 2019-12-03
Supplement: supp [file elife-50465-supp-v1.zip › elife_poa_e50465_Figure_3_figure_supplement_1_source_data_1.csv]

collection_category	fixed_substrate	isotype	strain	c_label	s_label	worms_on_sample	approximate_number_of_worms	latitude	longitude	island	landscape	sky_view	gridsect	gridsect_number	gridsect_direction	gridsect_radius	substrate_temperature	substrate_moisture	ambient_humidity	ambient_temperature	altitude	date	time	pcr_positive	species_id	photo_url_thumb
C. elegans	Fruit	ECA760	ECA779	C-2824	S-07420	Yes	Few (4-10)	20.039858	-155.441608	Big Island	Wild forest	Partially Obstructed	yes	3	E	2	20.6	NA	83.1	22.6	670.8930041	2017-08-17	14:56:00	1	C. elegans	https://storage.googleapis.com/elegansvariation.org/photos/hawaii2017/C-2824.thumb.jpg
C. elegans	Fruit	ECA760	ECA780	C-2824	S-07421	Yes	Few (4-10)	20.039858	-155.441608	Big Island	Wild forest	Partially Obstructed	yes	3	E	2	20.6	NA	83.1	22.6	670.8930041	2017-08-17	14:56:00	1	C. elegans	https://storage.googleapis.com/elegansvariation.org/photos/hawaii2017/C-2824.thumb.jpg
C. elegans	Fruit	ECA760	ECA808	C-2824	S-07422	Yes	Few (4-10)	20.039858	-155.441608	Big Island	Wild forest	Partially Obstructed	yes	3	E	2	20.6	NA	83.1	22.6	670.8930041	2017-08-17	14:56:00	1	C. elegans	https://storage.googleapis.com/elegansvariation.org/photos/hawaii2017/C-2824.thumb.jpg
C. elegans	Fruit	ECA778	ECA781	C-2824	S-07423	Yes	Few (4-10)	20.039858	-155.441608	Big Island	Wild forest	Partially Obstructed	yes	3	E	2	20.6	NA	83.1	22.6	670.8930041	2017-08-17	14:56:00	1	C. elegans	https://storage.googleapis.com/elegansvariation.org/photos/hawaii2017/C-2824.thumb.jpg
C. elegans	Leaf litter	ECA760	ECA760	C-2828	S-07315	Yes	Some (11-25)	20.039869	-155.441619	Big Island	Wild forest	Partially Obstructed	yes	3	F	3	21.2	67.5	84.2	22.6	670.8197674	2017-08-17	14:57:00	1	C. elegans	https://storage.googleapis.com/elegansvariation.org/photos/hawaii2017/C-2828.thumb.jpg
C. elegans	Leaf litter	ECA760	ECA769	C-2828	S-07372	Yes	Some (11-25)	20.039869	-155.441619	Big Island	Wild forest	Partially Obstructed	yes	3	F	3	21.2	67.5	84.2	22.6	670.8197674	2017-08-17	14:57:00	1	C. elegans	https://storage.googleapis.com/elegansvariation.org/photos/hawaii2017/C-2828.thumb.jpg
C. elegans	Leaf litter	ECA760	ECA739	C-2828	S-07375	Yes	Some (11-25)	20.039869	-155.441619	Big Island	Wild forest	Partially Obstructed	yes	3	F	3	21.2	67.5	84.2	22.6	670.8197674	2017-08-17	14:57:00	1	C. elegans	https://storage.googleapis.com/elegansvariation.org/photos/hawaii2017/C-2828.thumb.jpg
C. elegans	Leaf litter	ECA778	ECA763	C-2840	S-07355	Yes	Proliferating (25+)	20.039878	-155.441608	Big Island	Wild forest	Partially Obstructed	yes	3	C	3	20.7	70	82.7	22.6	670.6117647	2017-08-17	14:53:00	1	C. elegans	https://storage.googleapis.com/elegansvariation.org/photos/hawaii2017/C-2840.thumb.jpg
C. elegans	Leaf litter	ECA778	ECA764	C-2840	S-07357	Yes	Proliferating (25+)	20.039878	-155.441608	Big Island	Wild forest	Partially Obstructed	yes	3	C	3	20.7	70	82.7	22.6	670.6117647	2017-08-17	14:53:00	1	C. elegans	https://storage.googleapis.com/elegansvariation.org/photos/hawaii2017/C-2840.thumb.jpg
C. elegans	Leaf litter	ECA778	ECA765	C-2840	S-07358	Yes	Proliferating (25+)	20.039878	-155.441608	Big Island	Wild forest	Partially Obstructed	yes	3	C	3	20.7	70	82.7	22.6	670.6117647	2017-08-17	14:53:00	1	C. elegans	https://storage.googleapis.com/elegansvariation.org/photos/hawaii2017/C-2840.thumb.jpg
C. elegans	Leaf litter	ECA778	ECA766	C-2840	S-07359	Yes	Proliferating (25+)	20.039878	-155.441608	Big Island	Wild forest	Partially Obstructed	yes	3	C	3	20.7	70	82.7	22.6	670.6117647	2017-08-17	14:53:00	1	C. elegans	https://storage.googleapis.com/elegansvariation.org/photos/hawaii2017/C-2840.thumb.jpg
C. elegans	Leaf litter	ECA778	ECA767	C-2840	S-07365	Yes	Proliferating (25+)	20.039878	-155.441608	Big Island	Wild forest	Partially Obstructed	yes	3	C	3	20.7	70	82.7	22.6	670.6117647	2017-08-17	14:53:00	1	C. elegans	https://storage.googleapis.com/elegansvariation.org/photos/hawaii2017/C-2840.thumb.jpg
C. elegans	Leaf litter	ECA768	ECA768	C-2856	S-07368	Yes	Some (11-25)	20.039914	-155.441556	Big Island	Wild forest	Partially Obstructed	yes	3	A	2	21.9	69	87.6	21.9	669.971831	2017-08-17	14:51:00	1	C. elegans	https://storage.googleapis.com/elegansvariation.org/photos/hawaii2017/C-2856.thumb.jpg
C. elegans	Leaf litter	ECA812	ECA771	C-2879	S-07384	Yes	Few (4-10)	20.039864	-155.441644	Big Island	Wild forest	Partially Obstructed	yes	3	E	3	20.5	67	84.2	22.6	671.08125	2017-08-17	14:55:00	1	C. elegans	https://storage.googleapis.com/elegansvariation.org/photos/hawaii2017/C-2879.thumb.jpg
C. elegans	Leaf litter	ECA812	ECA773	C-2879	S-07387	Yes	Few (4-10)	20.039864	-155.441644	Big Island	Wild forest	Partially Obstructed	yes	3	E	3	20.5	67	84.2	22.6	671.08125	2017-08-17	14:55:00	1	C. elegans	https://storage.googleapis.com/elegansvariation.org/photos/hawaii2017/C-2879.thumb.jpg
C. elegans	Leaf litter	ECA730	ECA730	C-3058	S-06322	Yes	Very Few (1-3)	19.423869	-155.222483	Big Island	Rural garden	Partially Obstructed	yes	1	C	1	15	NA	94	18.4	1121.234234	2017-08-14	08:00:00	1	C. elegans	https://storage.googleapis.com/elegansvariation.org/photos/hawaii2017/C-3058.thumb.jpg
C. elegans	Leaf litter	ECA712	ECA711	C-3097	S-06054	Yes	Proliferating (25+)	19.423864	-155.222478	Big Island	Rural garden	Partially Obstructed	yes	1	A	1	15.4	71.5	94	18.5	1119.876923	2017-08-14	07:56:00	1	C. elegans	https://storage.googleapis.com/elegansvariation.org/photos/hawaii2017/C-3097.thumb.jpg
C. elegans	Leaf litter	ECA712	ECA712	C-3097	S-06058	Yes	Proliferating (25+)	19.423864	-155.222478	Big Island	Rural garden	Partially Obstructed	yes	1	A	1	15.4	71.5	94	18.5	1119.876923	2017-08-14	07:56:00	1	C. elegans	https://storage.googleapis.com/elegansvariation.org/photos/hawaii2017/C-3097.thumb.jpg
C. elegans	Leaf litter	ECA712	ECA713	C-3097	S-06059	Yes	Proliferating (25+)	19.423864	-155.222478	Big Island	Rural garden	Partially Obstructed	yes	1	A	1	15.4	71.5	94	18.5	1119.876923	2017-08-14	07:56:00	1	C. elegans	https://storage.googleapis.com/elegansvariation.org/photos/hawaii2017/C-3097.thumb.jpg
C. elegans	Leaf litter	ECA712	ECA714	C-3097	S-06073	Yes	Proliferating (25+)	19.423864	-155.222478	Big Island	Rural garden	Partially Obstructed	yes	1	A	1	15.4	71.5	94	18.5	1119.876923	2017-08-14	07:56:00	1	C. elegans	https://storage.googleapis.com/elegansvariation.org/photos/hawaii2017/C-3097.thumb.jpg
C. elegans	Leaf litter	ECA712	ECA715	C-3097	S-06076	Yes	Proliferating (25+)	19.423864	-155.222478	Big Island	Rural garden	Partially Obstructed	yes	1	A	1	15.4	71.5	94	18.5	1119.876923	2017-08-14	07:56:00	1	C. elegans	https://storage.googleapis.com/elegansvariation.org/photos/hawaii2017/C-3097.thumb.jpg
C. elegans	Leaf litter	ECA812	ECA812	C-3143	S-07541	Yes	Some (11-25)	20.039917	-155.441542	Big Island	Wild forest	Partially Obstructed	yes	3	D	2	19.8	68.5	80.9	22.6	655.4961832	2017-08-17	14:55:00	1	C. elegans	https://storage.googleapis.com/elegansvariation.org/photos/hawaii2017/C-3143.thumb.jpg
C. elegans	Leaf litter	ECA812	ECA813	C-3143	S-07638	Yes	Some (11-25)	20.039917	-155.441542	Big Island	Wild forest	Partially Obstructed	yes	3	D	2	19.8	68.5	80.9	22.6	655.4961832	2017-08-17	14:55:00	1	C. elegans	https://storage.googleapis.com/elegansvariation.org/photos/hawaii2017/C-3143.thumb.jpg
C. elegans	Leaf litter	ECA778	ECA810	C-3151	S-07530	Yes	Few (4-10)	20.039897	-155.441531	Big Island	Wild forest	Partially Obstructed	yes	3	C	1	19.8	67.5	81.9	22.6	656.5362319	2017-08-17	14:54:00	1	C. elegans	https://storage.googleapis.com/elegansvariation.org/photos/hawaii2017/C-3151.thumb.jpg
C. elegans	Leaf litter	ECA778	ECA811	C-3151	S-07534	Yes	Few (4-10)	20.039897	-155.441531	Big Island	Wild forest	Partially Obstructed	yes	3	C	1	19.8	67.5	81.9	22.6	656.5362319	2017-08-17	14:54:00	1	C. elegans	https://storage.googleapis.com/elegansvariation.org/photos/hawaii2017/C-3151.thumb.jpg
C. elegans	Fruit	ECA768	ECA772	C-3155	S-07385	Yes	Some (11-25)	20.039908	-155.441503	Big Island	Wild forest	Partially Obstructed	yes	3	B	2	21.5	NA	NA	NA	655.4036697	2017-08-17	14:53:00	1	C. elegans	https://storage.googleapis.com/elegansvariation.org/photos/hawaii2017/C-3155.thumb.jpg
C. elegans	Fruit	ECA777	ECA777	C-3155	S-07414	Yes	Some (11-25)	20.039908	-155.441503	Big Island	Wild forest	Partially Obstructed	yes	3	B	2	21.5	NA	NA	NA	655.4036697	2017-08-17	14:53:00	1	C. elegans	https://storage.googleapis.com/elegansvariation.org/photos/hawaii2017/C-3155.thumb.jpg
C. elegans	Fruit	ECA778	ECA778	C-3155	S-07415	Yes	Some (11-25)	20.039908	-155.441503	Big Island	Wild forest	Partially Obstructed	yes	3	B	2	21.5	NA	NA	NA	655.4036697	2017-08-17	14:53:00	1	C. elegans	https://storage.googleapis.com/elegansvariation.org/photos/hawaii2017/C-3155.thumb.jpg
C. elegans	Leaf litter	ECA760	ECA754	C-3189	S-07266	Yes	Some (11-25)	20.039869	-155.441464	Big Island	Wild forest	Partially Obstructed	yes	3	A	1	21.6	68.5	85.7	21.9	653.640118	2017-08-17	14:50:00	1	C. elegans	https://storage.googleapis.com/elegansvariation.org/photos/hawaii2017/C-3189.thumb.jpg
C. elegans	Leaf litter	ECA812	ECA755	C-3189	S-07267	Yes	Some (11-25)	20.039869	-155.441464	Big Island	Wild forest	Partially Obstructed	yes	3	A	1	21.6	68.5	85.7	21.9	653.640118	2017-08-17	14:50:00	1	C. elegans	https://storage.googleapis.com/elegansvariation.org/photos/hawaii2017/C-3189.thumb.jpg
C. elegans	Fruit	ECA760	ECA758	C-3197	S-07305	Yes	Some (11-25)	20.039886	-155.441531	Big Island	Wild forest	Partially Obstructed	yes	3	F	1	19.4	NA	76.5	23.3	651.980315	2017-08-17	14:57:00	1	C. elegans	https://storage.googleapis.com/elegansvariation.org/photos/hawaii2017/C-3197.thumb.jpg
C. elegans	Fruit	ECA812	ECA759	C-3197	S-07306	Yes	Some (11-25)	20.039886	-155.441531	Big Island	Wild forest	Partially Obstructed	yes	3	F	1	19.4	NA	76.5	23.3	651.980315	2017-08-17	14:57:00	1	C. elegans	https://storage.googleapis.com/elegansvariation.org/photos/hawaii2017/C-3197.thumb.jpg
C. elegans	Fruit	ECA807	ECA770	C-3201	S-07378	Yes	Proliferating (25+)	20.039869	-155.441531	Big Island	Wild forest	Partially Obstructed	yes	3	A	0	19.4	NA	78.2	24	649.3469388	2017-08-17	14:58:00	1	C. elegans	https://storage.googleapis.com/elegansvariation.org/photos/hawaii2017/C-3201.thumb.jpg
C. elegans	Fruit	ECA812	ECA774	C-3201	S-07388	Yes	Proliferating (25+)	20.039869	-155.441531	Big Island	Wild forest	Partially Obstructed	yes	3	A	0	19.4	NA	78.2	24	649.3469388	2017-08-17	14:58:00	1	C. elegans	https://storage.googleapis.com/elegansvariation.org/photos/hawaii2017/C-3201.thumb.jpg
C. elegans	Fruit	ECA812	ECA775	C-3201	S-07391	Yes	Proliferating (25+)	20.039869	-155.441531	Big Island	Wild forest	Partially Obstructed	yes	3	A	0	19.4	NA	78.2	24	649.3469388	2017-08-17	14:58:00	1	C. elegans	https://storage.googleapis.com/elegansvariation.org/photos/hawaii2017/C-3201.thumb.jpg
C. elegans	Fruit	ECA812	ECA776	C-3201	S-07392	Yes	Proliferating (25+)	20.039869	-155.441531	Big Island	Wild forest	Partially Obstructed	yes	3	A	0	19.4	NA	78.2	24	649.3469388	2017-08-17	14:58:00	1	C. elegans	https://storage.googleapis.com/elegansvariation.org/photos/hawaii2017/C-3201.thumb.jpg
C. elegans	Fruit	ECA807	ECA807	C-3201	S-07395	Yes	Proliferating (25+)	20.039869	-155.441531	Big Island	Wild forest	Partially Obstructed	yes	3	A	0	19.4	NA	78.2	24	649.3469388	2017-08-17	14:58:00	1	C. elegans	https://storage.googleapis.com/elegansvariation.org/photos/hawaii2017/C-3201.thumb.jpg
Oscheius sp.	Leaf litter	NA	NA	C-0271	S-07475	Yes	Few (4-10)	22.081467	-159.426286	Kauai	Wild forest	Obstructed	yes	9	D	2	23	59	77.5	24.9	281.0586957	2017-08-09	11:48:00	1	Oscheius sp.	https://storage.googleapis.com/elegansvariation.org/photos/hawaii2017/C-0271.thumb.jpg
Oscheius sp.	Fruit	NA	NA	C-0632	S-06487	Yes	Some (11-25)	21.175719	-157.008247	Molokai	Wild forest	Partially Obstructed	yes	19	A	2	21.9	67	89.6	22.6	497.7321429	2017-08-12	09:32:00	1	Oscheius sp.	https://storage.googleapis.com/elegansvariation.org/photos/hawaii2017/C-0632.thumb.jpg
Oscheius sp.	Leaf litter	NA	NA	C-0697	S-05612	Yes	Very Few (1-3)	22.0713	-159.417514	Kauai	Wild forest	Partially Obstructed	yes	7	C	2	24.6	69	69.6	28.1	160.0215827	2017-08-09	10:52:00	1	Oscheius sp.	https://storage.googleapis.com/elegansvariation.org/photos/hawaii2017/C-0697.thumb.jpg
Oscheius sp.	Leaf litter	NA	NA	C-0994	S-05752	Yes	Proliferating (25+)	22.194444	-159.478561	Kauai	Wild forest	Partially Obstructed	yes	11	D	3	21.7	63	76	26	188.0660066	2017-08-10	11:37:00	1	Oscheius sp.	https://storage.googleapis.com/elegansvariation.org/photos/hawaii2017/C-0994.thumb.jpg
Oscheius sp.	Leaf litter	NA	NA	C-2832	S-07400	Yes	Some (11-25)	20.039844	-155.441644	Big Island	Wild forest	Partially Obstructed	yes	3	F	2	20.5	69	80.8	22.6	671.333887	2017-08-17	14:58:00	1	Oscheius sp.	https://storage.googleapis.com/elegansvariation.org/photos/hawaii2017/C-2832.thumb.jpg
C. briggsae	Leaf litter	NA	NA	C-0264	S-05581	Yes	Few (4-10)	22.08145	-159.426125	Kauai	Wild forest	Obstructed	yes	9	F	2	21.9	66.5	80.4	25.6	281.4824121	2017-08-09	11:42:00	1	C. briggsae	https://storage.googleapis.com/elegansvariation.org/photos/hawaii2017/C-0264.thumb.jpg
C. briggsae	Leaf litter	NA	NA	C-0266	S-07467	Yes	Few (4-10)	22.081364	-159.426144	Kauai	Wild forest	Obstructed	yes	9	D	3	22.7	NA	79.4	24.9	281.4052288	2017-08-09	11:47:00	1	C. briggsae	https://storage.googleapis.com/elegansvariation.org/photos/hawaii2017/C-0266.thumb.jpg
C. briggsae	Leaf litter	NA	NA	C-0266	S-07472	Yes	Few (4-10)	22.081364	-159.426144	Kauai	Wild forest	Obstructed	yes	9	D	3	22.7	NA	79.4	24.9	281.4052288	2017-08-09	11:47:00	1	C. briggsae	https://storage.googleapis.com/elegansvariation.org/photos/hawaii2017/C-0266.thumb.jpg
C. briggsae	Leaf litter	NA	NA	C-0271	S-07483	Yes	Few (4-10)	22.081467	-159.426286	Kauai	Wild forest	Obstructed	yes	9	D	2	23	59	77.5	24.9	281.0586957	2017-08-09	11:48:00	1	C. briggsae	https://storage.googleapis.com/elegansvariation.org/photos/hawaii2017/C-0271.thumb.jpg
C. briggsae	Leaf litter	NA	NA	C-0271	S-07499	Yes	Few (4-10)	22.081467	-159.426286	Kauai	Wild forest	Obstructed	yes	9	D	2	23	59	77.5	24.9	281.0586957	2017-08-09	11:48:00	1	C. briggsae	https://storage.googleapis.com/elegansvariation.org/photos/hawaii2017/C-0271.thumb.jpg
C. briggsae	Leaf litter	NA	NA	C-0288	S-07481	Yes	Few (4-10)	22.081539	-159.426136	Kauai	Wild forest	Obstructed	yes	9	A	3	22.1	69.5	80.4	25.6	287.6963907	2017-08-09	11:42:00	1	C. briggsae	https://storage.googleapis.com/elegansvariation.org/photos/hawaii2017/C-0288.thumb.jpg
C. briggsae	Leaf litter	NA	NA	C-0288	S-07496	Yes	Few (4-10)	22.081539	-159.426136	Kauai	Wild forest	Obstructed	yes	9	A	3	22.1	69.5	80.4	25.6	287.6963907	2017-08-09	11:42:00	1	C. briggsae	https://storage.googleapis.com/elegansvariation.org/photos/hawaii2017/C-0288.thumb.jpg
C. briggsae	Leaf litter	NA	NA	C-0418	S-05793	Yes	Very Few (1-3)	22.131522	-159.660467	Kauai	Wild forest	Partially Obstructed	yes	10	C	3	18.3	48	64.3	23.3	1165.131455	2017-08-10	11:20:00	1	C. briggsae	https://storage.googleapis.com/elegansvariation.org/photos/hawaii2017/C-0418.thumb.jpg
C. briggsae	Leaf litter	NA	NA	C-0776	S-05566	Yes	Very Few (1-3)	22.081653	-159.425986	Kauai	Wild forest	Partially Obstructed	yes	8	D	3	22.4	64	78.7	24.9	277.3657143	2017-08-09	11:30:00	1	C. briggsae	https://storage.googleapis.com/elegansvariation.org/photos/hawaii2017/C-0776.thumb.jpg
C. briggsae	Leaf litter	NA	NA	C-0781	S-05631	Yes	Some (11-25)	22.081617	-159.425939	Kauai	Wild forest	Partially Obstructed	yes	8	E	3	21.6	61.5	77.1	24.9	272.6848485	2017-08-09	11:29:00	1	C. briggsae	https://storage.googleapis.com/elegansvariation.org/photos/hawaii2017/C-0781.thumb.jpg
C. briggsae	Leaf litter	NA	NA	C-0781	S-05632	Yes	Some (11-25)	22.081617	-159.425939	Kauai	Wild forest	Partially Obstructed	yes	8	E	3	21.6	61.5	77.1	24.9	272.6848485	2017-08-09	11:29:00	1	C. briggsae	https://storage.googleapis.com/elegansvariation.org/photos/hawaii2017/C-0781.thumb.jpg
C. briggsae	Leaf litter	NA	NA	C-0921	S-05784	Yes	Proliferating (25+)	22.194403	-159.478553	Kauai	Wild forest	Partially Obstructed	yes	11	B	2	23.3	66	78.5	25.666666666666668	198.68	2017-08-10	11:33:00	1	C. briggsae	https://storage.googleapis.com/elegansvariation.org/photos/hawaii2017/C-0921.thumb.jpg
C. briggsae	Leaf litter	NA	NA	C-0921	S-05785	Yes	Proliferating (25+)	22.194403	-159.478553	Kauai	Wild forest	Partially Obstructed	yes	11	B	2	23.3	66	78.5	25.666666666666668	198.68	2017-08-10	11:33:00	1	C. briggsae	https://storage.googleapis.com/elegansvariation.org/photos/hawaii2017/C-0921.thumb.jpg
C. briggsae	Leaf litter	NA	NA	C-0958	S-05741	Yes	Very Few (1-3)	22.194383	-159.478608	Kauai	Wild forest	Partially Obstructed	yes	11	D	1	23.2	59	75.6	25.666666666666668	198.9180328	2017-08-10	11:36:00	1	C. briggsae	https://storage.googleapis.com/elegansvariation.org/photos/hawaii2017/C-0958.thumb.jpg
C. briggsae	Leaf litter	NA	NA	C-0982	S-05954	Yes	Proliferating (25+)	22.194408	-159.4786	Kauai	Wild forest	Partially Obstructed	yes	11	A	3	23.5	43	79	26.5	191.8259494	2017-08-10	11:31:00	1	C. briggsae	https://storage.googleapis.com/elegansvariation.org/photos/hawaii2017/C-0982.thumb.jpg
C. briggsae	Leaf litter	NA	NA	C-0982	S-05957	Yes	Proliferating (25+)	22.194408	-159.4786	Kauai	Wild forest	Partially Obstructed	yes	11	A	3	23.5	43	79	26.5	191.8259494	2017-08-10	11:31:00	1	C. briggsae	https://storage.googleapis.com/elegansvariation.org/photos/hawaii2017/C-0982.thumb.jpg
C. briggsae	Leaf litter	NA	NA	C-1000	S-05787	Yes	Proliferating (25+)	22.194356	-159.478597	Kauai	Wild forest	Partially Obstructed	yes	11	F	1	24.5	49.5	76.6	27.055555555555557	200.0536585	2017-08-10	11:29:00	1	C. briggsae	https://storage.googleapis.com/elegansvariation.org/photos/hawaii2017/C-1000.thumb.jpg
C. briggsae	Leaf litter	NA	NA	C-1000	S-05788	Yes	Proliferating (25+)	22.194356	-159.478597	Kauai	Wild forest	Partially Obstructed	yes	11	F	1	24.5	49.5	76.6	27.055555555555557	200.0536585	2017-08-10	11:29:00	1	C. briggsae	https://storage.googleapis.com/elegansvariation.org/photos/hawaii2017/C-1000.thumb.jpg
C. briggsae	Leaf litter	NA	NA	C-1002	S-05765	Yes	Some (11-25)	22.194392	-159.478603	Kauai	Wild forest	Partially Obstructed	yes	11	E	3	22.8	49	76.9	26	189.630137	2017-08-10	11:39:00	1	C. briggsae	https://storage.googleapis.com/elegansvariation.org/photos/hawaii2017/C-1002.thumb.jpg
C. briggsae	Leaf litter	NA	NA	C-1002	S-05766	Yes	Some (11-25)	22.194392	-159.478603	Kauai	Wild forest	Partially Obstructed	yes	11	E	3	22.8	49	76.9	26	189.630137	2017-08-10	11:39:00	1	C. briggsae	https://storage.googleapis.com/elegansvariation.org/photos/hawaii2017/C-1002.thumb.jpg
C. briggsae	Leaf litter	NA	NA	C-1004	S-05763	Yes	Some (11-25)	22.194347	-159.478572	Kauai	Wild forest	Partially Obstructed	yes	11	F	2	24.5	63	77.1	26.33333333333334	200.3820225	2017-08-10	11:30:00	1	C. briggsae	https://storage.googleapis.com/elegansvariation.org/photos/hawaii2017/C-1004.thumb.jpg
C. briggsae	Leaf litter	NA	NA	C-1004	S-05764	Yes	Some (11-25)	22.194347	-159.478572	Kauai	Wild forest	Partially Obstructed	yes	11	F	2	24.5	63	77.1	26.33333333333334	200.3820225	2017-08-10	11:30:00	1	C. briggsae	https://storage.googleapis.com/elegansvariation.org/photos/hawaii2017/C-1004.thumb.jpg
C. briggsae	Leaf litter	NA	NA	C-1089	S-05709	Yes	Proliferating (25+)	22.194411	-159.478614	Kauai	Wild forest	Partially Obstructed	yes	11	F	3	23.3	62.5	75.5	26.7	193.4864865	2017-08-10	11:28:00	1	C. briggsae	https://storage.googleapis.com/elegansvariation.org/photos/hawaii2017/C-1089.thumb.jpg
C. briggsae	Leaf litter	NA	NA	C-1121	S-05732	Yes	Proliferating (25+)	22.194411	-159.478544	Kauai	Wild forest	Partially Obstructed	yes	11	C	1	22.5	66	76.6	25.666666666666668	198.4620253	2017-08-10	11:34:00	1	C. briggsae	https://storage.googleapis.com/elegansvariation.org/photos/hawaii2017/C-1121.thumb.jpg
C. briggsae	Leaf litter	NA	NA	C-1121	S-05733	Yes	Proliferating (25+)	22.194411	-159.478544	Kauai	Wild forest	Partially Obstructed	yes	11	C	1	22.5	66	76.6	25.666666666666668	198.4620253	2017-08-10	11:34:00	1	C. briggsae	https://storage.googleapis.com/elegansvariation.org/photos/hawaii2017/C-1121.thumb.jpg
C. briggsae	Leaf litter	NA	NA	C-2527	S-06740	Yes	Few (4-10)	20.887489	-156.307192	Maui	Wild forest	Partially Obstructed	yes	15	A	1	23.1	60	73.1	25.6	200.1682692	2017-08-15	15:25:00	1	C. briggsae	https://storage.googleapis.com/elegansvariation.org/photos/hawaii2017/C-2527.thumb.jpg
C. briggsae	Fruit	NA	NA	C-2604	S-06898	Yes	Some (11-25)	20.664919	-156.049008	Maui	Wild forest	Partially Obstructed	yes	17	B	3	24	64.5	70.5	26.7	103.5895652	2017-08-17	15:38:00	1	C. briggsae	https://storage.googleapis.com/elegansvariation.org/photos/hawaii2017/C-2604.thumb.jpg
C. briggsae	Fruit	NA	NA	C-2604	S-06900	Yes	Some (11-25)	20.664919	-156.049008	Maui	Wild forest	Partially Obstructed	yes	17	B	3	24	64.5	70.5	26.7	103.5895652	2017-08-17	15:38:00	1	C. briggsae	https://storage.googleapis.com/elegansvariation.org/photos/hawaii2017/C-2604.thumb.jpg
PCR -	Leaf litter	NA	NA	C-0262	S-05605	Yes	Few (4-10)	22.081506	-159.426217	Kauai	Wild forest	Obstructed	yes	9	F	3	22	64.5	77.1	24.9	282.74375	2017-08-09	11:40:00	0	Unknown	https://storage.googleapis.com/elegansvariation.org/photos/hawaii2017/C-0262.thumb.jpg
PCR -	Flower	NA	NA	C-0263	S-07506	Yes	Proliferating (25+)	22.081378	-159.426053	Kauai	Wild forest	Obstructed	yes	9	B	1	22.1	NA	76.1	25.6	281.6298701	2017-08-09	11:44:00	0	Unknown	https://storage.googleapis.com/elegansvariation.org/photos/hawaii2017/C-0263.thumb.jpg
PCR -	Flower	NA	NA	C-0263	S-07512	Yes	Proliferating (25+)	22.081378	-159.426053	Kauai	Wild forest	Obstructed	yes	9	B	1	22.1	NA	76.1	25.6	281.6298701	2017-08-09	11:44:00	0	Unknown	https://storage.googleapis.com/elegansvariation.org/photos/hawaii2017/C-0263.thumb.jpg
PCR -	Leaf litter	NA	NA	C-0265	S-05185	Yes	Proliferating (25+)	22.081536	-159.426114	Kauai	Wild forest	Obstructed	yes	9	A	1	22.1	65.5	76.1	26.3	285.0911111	2017-08-09	11:43:00	0	Unknown	https://storage.googleapis.com/elegansvariation.org/photos/hawaii2017/C-0265.thumb.jpg
PCR -	Leaf litter	NA	NA	C-0265	S-07517	Yes	Proliferating (25+)	22.081536	-159.426114	Kauai	Wild forest	Obstructed	yes	9	A	1	22.1	65.5	76.1	26.3	285.0911111	2017-08-09	11:43:00	0	Unknown	https://storage.googleapis.com/elegansvariation.org/photos/hawaii2017/C-0265.thumb.jpg
PCR -	Leaf litter	NA	NA	C-0275	S-05604	Yes	Few (4-10)	22.081447	-159.426214	Kauai	Wild forest	Obstructed	yes	9	C	3	22.2	68.5	79.8	24.9	281.8470255	2017-08-09	11:45:00	0	Unknown	https://storage.googleapis.com/elegansvariation.org/photos/hawaii2017/C-0275.thumb.jpg
PCR -	Leaf litter	NA	NA	C-0281	S-05586	Yes	Very Few (1-3)	22.081308	-159.426189	Kauai	Wild forest	Obstructed	yes	9	A	0	21.8	69	78	24.9	283.2833333	2017-08-09	11:49:00	0	Unknown	https://storage.googleapis.com/elegansvariation.org/photos/hawaii2017/C-0281.thumb.jpg
PCR -	Leaf litter	NA	NA	C-0282	S-05607	Yes	Proliferating (25+)	22.081308	-159.426189	Kauai	Wild forest	Obstructed	yes	9	D	1	22	69	79.5	24.9	283.666792	2017-08-09	11:48:00	0	Unknown	https://storage.googleapis.com/elegansvariation.org/photos/hawaii2017/C-0282.thumb.jpg
PCR -	Leaf litter	NA	NA	C-0282	S-05608	Yes	Proliferating (25+)	22.081308	-159.426189	Kauai	Wild forest	Obstructed	yes	9	D	1	22	69	79.5	24.9	283.666792	2017-08-09	11:48:00	0	Unknown	https://storage.googleapis.com/elegansvariation.org/photos/hawaii2017/C-0282.thumb.jpg
PCR -	Leaf litter	NA	NA	C-0283	S-05219	Yes	Few (4-10)	22.081319	-159.426267	Kauai	Wild forest	Obstructed	yes	9	C	2	22	70	80.5	25.6	284.374359	2017-08-09	11:47:00	0	Unknown	https://storage.googleapis.com/elegansvariation.org/photos/hawaii2017/C-0283.thumb.jpg
PCR -	Leaf litter	NA	NA	C-0283	S-05224	Yes	Few (4-10)	22.081319	-159.426267	Kauai	Wild forest	Obstructed	yes	9	C	2	22	70	80.5	25.6	284.374359	2017-08-09	11:47:00	0	Unknown	https://storage.googleapis.com/elegansvariation.org/photos/hawaii2017/C-0283.thumb.jpg
PCR -	Leaf litter	NA	NA	C-0284	S-05195	Yes	Some (11-25)	22.081356	-159.426164	Kauai	Wild forest	Obstructed	yes	9	C	1	21.7	70	79.8	24.9	283.8963415	2017-08-09	11:46:00	0	Unknown	https://storage.googleapis.com/elegansvariation.org/photos/hawaii2017/C-0284.thumb.jpg
PCR -	Leaf litter	NA	NA	C-0284	S-05196	Yes	Some (11-25)	22.081356	-159.426164	Kauai	Wild forest	Obstructed	yes	9	C	1	21.7	70	79.8	24.9	283.8963415	2017-08-09	11:46:00	0	Unknown	https://storage.googleapis.com/elegansvariation.org/photos/hawaii2017/C-0284.thumb.jpg
PCR -	Leaf litter	NA	NA	C-0285	S-05595	Yes	Some (11-25)	22.081478	-159.426103	Kauai	Wild forest	Obstructed	yes	9	B	3	22.1	69	76.1	25.6	286.7062147	2017-08-09	11:44:00	0	Unknown	https://storage.googleapis.com/elegansvariation.org/photos/hawaii2017/C-0285.thumb.jpg
PCR -	Leaf litter	NA	NA	C-0285	S-05598	Yes	Some (11-25)	22.081478	-159.426103	Kauai	Wild forest	Obstructed	yes	9	B	3	22.1	69	76.1	25.6	286.7062147	2017-08-09	11:44:00	0	Unknown	https://storage.googleapis.com/elegansvariation.org/photos/hawaii2017/C-0285.thumb.jpg
PCR -	Leaf litter	NA	NA	C-0286	S-05220	Yes	Some (11-25)	22.081408	-159.42615	Kauai	Wild forest	Obstructed	yes	9	B	2	22.1	66	76.9	25.6	289.3157163	2017-08-09	11:45:00	0	Unknown	https://storage.googleapis.com/elegansvariation.org/photos/hawaii2017/C-0286.thumb.jpg
PCR -	Leaf litter	NA	NA	C-0286	S-05221	Yes	Some (11-25)	22.081408	-159.42615	Kauai	Wild forest	Obstructed	yes	9	B	2	22.1	66	76.9	25.6	289.3157163	2017-08-09	11:45:00	0	Unknown	https://storage.googleapis.com/elegansvariation.org/photos/hawaii2017/C-0286.thumb.jpg
PCR -	Leaf litter	NA	NA	C-0287	S-07493	Yes	Few (4-10)	22.081397	-159.426083	Kauai	Wild forest	Obstructed	yes	9	A	2	22.1	67	76.1	26.3	287.0356234	2017-08-09	11:43:00	0	Unknown	https://storage.googleapis.com/elegansvariation.org/photos/hawaii2017/C-0287.thumb.jpg
PCR -	Leaf litter	NA	NA	C-0287	S-07495	Yes	Few (4-10)	22.081397	-159.426083	Kauai	Wild forest	Obstructed	yes	9	A	2	22.1	67	76.1	26.3	287.0356234	2017-08-09	11:43:00	0	Unknown	https://storage.googleapis.com/elegansvariation.org/photos/hawaii2017/C-0287.thumb.jpg
PCR -	Leaf litter	NA	NA	C-0287	S-07500	Yes	Few (4-10)	22.081397	-159.426083	Kauai	Wild forest	Obstructed	yes	9	A	2	22.1	67	76.1	26.3	287.0356234	2017-08-09	11:43:00	0	Unknown	https://storage.googleapis.com/elegansvariation.org/photos/hawaii2017/C-0287.thumb.jpg
PCR -	Leaf litter	NA	NA	C-0289	S-05671	Yes	Very Few (1-3)	22.081461	-159.426097	Kauai	Wild forest	Obstructed	yes	9	F	1	21.8	64	77.1	24.9	277.7304965	2017-08-09	11:41:00	0	Unknown	https://storage.googleapis.com/elegansvariation.org/photos/hawaii2017/C-0289.thumb.jpg
PCR -	Leaf litter	NA	NA	C-0290	S-05560	Yes	Few (4-10)	22.081394	-159.426297	Kauai	Wild forest	Obstructed	yes	9	E	2	22.1	67.5	77.4	24.9	280.7883212	2017-08-09	11:40:00	0	Unknown	https://storage.googleapis.com/elegansvariation.org/photos/hawaii2017/C-0290.thumb.jpg
PCR -	Leaf litter	NA	NA	C-0290	S-05564	Yes	Few (4-10)	22.081394	-159.426297	Kauai	Wild forest	Obstructed	yes	9	E	2	22.1	67.5	77.4	24.9	280.7883212	2017-08-09	11:40:00	0	Unknown	https://storage.googleapis.com/elegansvariation.org/photos/hawaii2017/C-0290.thumb.jpg
PCR -	Leaf litter	NA	NA	C-0292	S-05227	Yes	Some (11-25)	22.081628	-159.426011	Kauai	Wild forest	Partially Obstructed	yes	8	E	1	22.5	64	77.5	24.9	275.1689189	2017-08-09	11:29:00	0	Unknown	https://storage.googleapis.com/elegansvariation.org/photos/hawaii2017/C-0292.thumb.jpg
PCR -	Leaf litter	NA	NA	C-0292	S-05228	Yes	Some (11-25)	22.081628	-159.426011	Kauai	Wild forest	Partially Obstructed	yes	8	E	1	22.5	64	77.5	24.9	275.1689189	2017-08-09	11:29:00	0	Unknown	https://storage.googleapis.com/elegansvariation.org/photos/hawaii2017/C-0292.thumb.jpg
PCR -	Leaf litter	NA	NA	C-0293	S-07464	Yes	Few (4-10)	22.081589	-159.426014	Kauai	Wild forest	Partially Obstructed	yes	8	F	2	22.8	62	78.2	24.9	276.9055118	2017-08-09	11:28:00	0	Unknown	https://storage.googleapis.com/elegansvariation.org/photos/hawaii2017/C-0293.thumb.jpg
PCR -	Leaf litter	NA	NA	C-0297	S-05602	Yes	Very Few (1-3)	22.081622	-159.425942	Kauai	Wild forest	Partially Obstructed	yes	8	A	3	22.5	67.5	80.1	24.9	271.4771574	2017-08-09	11:25:00	0	Unknown	https://storage.googleapis.com/elegansvariation.org/photos/hawaii2017/C-0297.thumb.jpg
PCR -	Leaf litter	NA	NA	C-0298	S-05549	Yes	Few (4-10)	22.081633	-159.425944	Kauai	Wild forest	Partially Obstructed	yes	8	F	3	22.4	60	81.4	24.9	275.2277228	2017-08-09	11:27:00	0	Unknown	https://storage.googleapis.com/elegansvariation.org/photos/hawaii2017/C-0298.thumb.jpg
PCR -	Leaf litter	NA	NA	C-0300	S-05233	Yes	Some (11-25)	22.081642	-159.426031	Kauai	Wild forest	Partially Obstructed	yes	8	B	1	22.9	68.5	78	25.2	279.5676101	2017-08-09	11:34:00	0	Unknown	https://storage.googleapis.com/elegansvariation.org/photos/hawaii2017/C-0300.thumb.jpg
PCR -	Leaf litter	NA	NA	C-0300	S-05562	Yes	Some (11-25)	22.081642	-159.426031	Kauai	Wild forest	Partially Obstructed	yes	8	B	1	22.9	68.5	78	25.2	279.5676101	2017-08-09	11:34:00	0	Unknown	https://storage.googleapis.com/elegansvariation.org/photos/hawaii2017/C-0300.thumb.jpg
PCR -	Leaf litter	NA	NA	C-0331	S-06527	Yes	Very Few (1-3)	20.949444	-156.535461	Maui	Wild forest	Partially Obstructed	yes	13	E	3	21.3	57	88.8	23.6	425.0687023	2017-08-13	15:41:00	0	Unknown	https://storage.googleapis.com/elegansvariation.org/photos/hawaii2017/C-0331.thumb.jpg
PCR -	Leaf litter	NA	NA	C-0406	S-05805	Yes	Proliferating (25+)	22.131269	-159.660294	Kauai	Wild forest	Partially Obstructed	yes	10	A	3	18.7	67.5	62.2	24	1159.721649	2017-08-10	11:14:00	0	Unknown	https://storage.googleapis.com/elegansvariation.org/photos/hawaii2017/C-0406.thumb.jpg
PCR -	Leaf litter	NA	NA	C-0406	S-05806	Yes	Proliferating (25+)	22.131269	-159.660294	Kauai	Wild forest	Partially Obstructed	yes	10	A	3	18.7	67.5	62.2	24	1159.721649	2017-08-10	11:14:00	0	Unknown	https://storage.googleapis.com/elegansvariation.org/photos/hawaii2017/C-0406.thumb.jpg
PCR -	Leaf litter	NA	NA	C-0520	S-05255	Yes	Very Few (1-3)	22.131492	-159.660439	Kauai	Wild forest	Partially Obstructed	yes	6	C	3	17	29.5	71.1	19.5	1153.620253	2017-08-08	09:00:00	0	Unknown	https://storage.googleapis.com/elegansvariation.org/photos/hawaii2017/C-0520.thumb.jpg
PCR -	Leaf litter	NA	NA	C-0523	S-05363	Yes	Very Few (1-3)	22.131497	-159.660464	Kauai	Wild forest	Partially Obstructed	yes	6	F	2	17.7	51.5	76	19.7	1157.310811	2017-08-08	08:57:00	0	Unknown	https://storage.googleapis.com/elegansvariation.org/photos/hawaii2017/C-0523.thumb.jpg
PCR -	Leaf litter	NA	NA	C-0523	S-05364	Yes	Very Few (1-3)	22.131497	-159.660464	Kauai	Wild forest	Partially Obstructed	yes	6	F	2	17.7	51.5	76	19.7	1157.310811	2017-08-08	08:57:00	0	Unknown	https://storage.googleapis.com/elegansvariation.org/photos/hawaii2017/C-0523.thumb.jpg
PCR -	Leaf litter	NA	NA	C-0562	S-06510	Yes	Few (4-10)	21.138145	-156.965772	Molokai	Wild forest	Partially Obstructed	yes	20	A	0	23.7	67.5	65.7	27.4	766	2017-08-12	12:17:00	0	Unknown	https://storage.googleapis.com/elegansvariation.org/photos/hawaii2017/C-0562.thumb.jpg
PCR -	Leaf litter	NA	NA	C-0616	S-05807	Yes	Proliferating (25+)	21.96537236	-159.6143508	Kauai	Wild forest	Partially Obstructed	yes	10	E	1	20.1	52.5	60.5	23.3	1158.028409	2017-08-10	11:25:00	0	Unknown	https://storage.googleapis.com/elegansvariation.org/photos/hawaii2017/C-0616.thumb.jpg
PCR -	Leaf litter	NA	NA	C-0616	S-05809	Yes	Proliferating (25+)	21.96537236	-159.6143508	Kauai	Wild forest	Partially Obstructed	yes	10	E	1	20.1	52.5	60.5	23.3	1158.028409	2017-08-10	11:25:00	0	Unknown	https://storage.googleapis.com/elegansvariation.org/photos/hawaii2017/C-0616.thumb.jpg
PCR -	Leaf litter	NA	NA	C-0617	S-05692	Yes	Proliferating (25+)	21.96537236	-159.6143508	Kauai	Wild forest	Partially Obstructed	yes	10	C	1	18.5	39	64.3	23.3	1158.028409	2017-08-10	11:20:00	0	Unknown	https://storage.googleapis.com/elegansvariation.org/photos/hawaii2017/C-0617.thumb.jpg
PCR -	Leaf litter	NA	NA	C-0617	S-05942	Yes	Proliferating (25+)	21.96537236	-159.6143508	Kauai	Wild forest	Partially Obstructed	yes	10	C	1	18.5	39	64.3	23.3	1158.028409	2017-08-10	11:20:00	0	Unknown	https://storage.googleapis.com/elegansvariation.org/photos/hawaii2017/C-0617.thumb.jpg
PCR -	Leaf litter	NA	NA	C-0617	S-05943	Yes	Proliferating (25+)	21.96537236	-159.6143508	Kauai	Wild forest	Partially Obstructed	yes	10	C	1	18.5	39	64.3	23.3	1158.028409	2017-08-10	11:20:00	0	Unknown	https://storage.googleapis.com/elegansvariation.org/photos/hawaii2017/C-0617.thumb.jpg
PCR -	Fruit	NA	NA	C-0622	S-06446	Yes	Very Few (1-3)	21.138017	-156.965847	Molokai	Wild forest	Partially Obstructed	yes	20	E	3	21.3	58	67.2	25.3	756.7776316	2017-08-12	12:30:00	0	Unknown	https://storage.googleapis.com/elegansvariation.org/photos/hawaii2017/C-0622.thumb.jpg
PCR -	Leaf litter	NA	NA	C-0624	S-06460	Yes	Some (11-25)	21.177158	-157.005439	Molokai	Wild forest	Obstructed	yes	18	F	1	21.3	36.5	89.7	21.5	507.6340852	2017-08-12	08:49:00	0	Unknown	https://storage.googleapis.com/elegansvariation.org/photos/hawaii2017/C-0624.thumb.jpg
PCR -	Leaf litter	NA	NA	C-0624	S-06461	Yes	Some (11-25)	21.177158	-157.005439	Molokai	Wild forest	Obstructed	yes	18	F	1	21.3	36.5	89.7	21.5	507.6340852	2017-08-12	08:49:00	0	Unknown	https://storage.googleapis.com/elegansvariation.org/photos/hawaii2017/C-0624.thumb.jpg
PCR -	Leaf litter	NA	NA	C-0627	S-06495	Yes	Very Few (1-3)	21.176986	-157.005517	Molokai	Wild forest	Partially Obstructed	yes	18	D	1	23.1	66	86.3	22.2	488.7848837	2017-08-12	08:44:00	0	Unknown	https://storage.googleapis.com/elegansvariation.org/photos/hawaii2017/C-0627.thumb.jpg
PCR -	Fruit	NA	NA	C-0632	S-06486	Yes	Some (11-25)	21.175719	-157.008247	Molokai	Wild forest	Partially Obstructed	yes	19	A	2	21.9	67	89.6	22.6	497.7321429	2017-08-12	09:32:00	0	Unknown	https://storage.googleapis.com/elegansvariation.org/photos/hawaii2017/C-0632.thumb.jpg
PCR -	Leaf litter	NA	NA	C-0639	S-06511	Yes	Very Few (1-3)	21.175619	-157.008375	Molokai	Wild forest	Partially Obstructed	yes	19	E	1	21.6	63	80.6	24	501.5228758	2017-08-12	09:43:00	0	Unknown	https://storage.googleapis.com/elegansvariation.org/photos/hawaii2017/C-0639.thumb.jpg
PCR -	Leaf litter	NA	NA	C-0640	S-06512	Yes	Very Few (1-3)	21.175638	-157.008266	Molokai	Wild forest	Partially Obstructed	yes	19	F	2	21.3	68	84.8	23.3	491	2017-08-12	09:45:00	0	Unknown	https://storage.googleapis.com/elegansvariation.org/photos/hawaii2017/C-0640.thumb.jpg
PCR -	Leaf litter	NA	NA	C-0645	S-06482	Yes	Some (11-25)	21.177225	-157.005756	Molokai	Wild forest	Partially Obstructed	yes	18	B	1	21.4	51	85.9	22.2	536.5702479	2017-08-12	08:40:00	0	Unknown	https://storage.googleapis.com/elegansvariation.org/photos/hawaii2017/C-0645.thumb.jpg
PCR -	Leaf litter	NA	NA	C-0645	S-06483	Yes	Some (11-25)	21.177225	-157.005756	Molokai	Wild forest	Partially Obstructed	yes	18	B	1	21.4	51	85.9	22.2	536.5702479	2017-08-12	08:40:00	0	Unknown	https://storage.googleapis.com/elegansvariation.org/photos/hawaii2017/C-0645.thumb.jpg
PCR -	Leaf litter	NA	NA	C-0651	S-05502	Yes	Very Few (1-3)	22.131517	-159.660483	Kauai	Wild forest	Partially Obstructed	yes	6	B	3	18.5	67	76.3	19.88888888888889	1170.595745	2017-08-08	09:02:00	0	Unknown	https://storage.googleapis.com/elegansvariation.org/photos/hawaii2017/C-0651.thumb.jpg
PCR -	Leaf litter	NA	NA	C-0653	S-05347	Yes	Very Few (1-3)	22.131581	-159.660472	Kauai	Wild forest	Partially Obstructed	yes	6	B	2	17.2	65.5	75.4	19.88888888888889	1169.733032	2017-08-08	09:04:00	0	Unknown	https://storage.googleapis.com/elegansvariation.org/photos/hawaii2017/C-0653.thumb.jpg
PCR -	Leaf litter	NA	NA	C-0658	S-05434	Yes	Some (11-25)	22.131444	-159.660425	Kauai	Wild forest	Partially Obstructed	yes	6	E	3	16.7	51.5	78.4	19.166666666666668	1170.800305	2017-08-08	08:57:00	0	Unknown	https://storage.googleapis.com/elegansvariation.org/photos/hawaii2017/C-0658.thumb.jpg
PCR -	Leaf litter	NA	NA	C-0659	S-05488	Yes	Very Few (1-3)	22.131481	-159.660469	Kauai	Wild forest	Partially Obstructed	yes	6	A	0	15.8	57	76	19.88888888888889	1170.909677	2017-08-08	08:52:00	0	Unknown	https://storage.googleapis.com/elegansvariation.org/photos/hawaii2017/C-0659.thumb.jpg
PCR -	Leaf litter	NA	NA	C-0696	S-05187	Yes	Few (4-10)	22.071294	-159.417508	Kauai	Wild forest	Partially Obstructed	yes	7	C	3	24.5	67.5	72.7	28.8	158.13	2017-08-09	10:52:00	0	Unknown	https://storage.googleapis.com/elegansvariation.org/photos/hawaii2017/C-0696.thumb.jpg
PCR -	Leaf litter	NA	NA	C-0696	S-05189	Yes	Few (4-10)	22.071294	-159.417508	Kauai	Wild forest	Partially Obstructed	yes	7	C	3	24.5	67.5	72.7	28.8	158.13	2017-08-09	10:52:00	0	Unknown	https://storage.googleapis.com/elegansvariation.org/photos/hawaii2017/C-0696.thumb.jpg
PCR -	Leaf litter	NA	NA	C-0698	S-05644	Yes	Very Few (1-3)	22.071367	-159.417506	Kauai	Wild forest	Partially Obstructed	yes	7	C	1	24.1	68	72	27.4	157.8187135	2017-08-09	10:53:00	0	Unknown	https://storage.googleapis.com/elegansvariation.org/photos/hawaii2017/C-0698.thumb.jpg
PCR -	Leaf litter	NA	NA	C-0727	S-05353	Yes	Very Few (1-3)	22.131478	-159.660425	Kauai	Wild forest	Partially Obstructed	yes	6	F	1	16.4	55	78.4	19.166666666666668	1170.479452	2017-08-08	08:56:00	0	Unknown	https://storage.googleapis.com/elegansvariation.org/photos/hawaii2017/C-0727.thumb.jpg
PCR -	Leaf litter	NA	NA	C-0750	S-06743	Yes	Very Few (1-3)	20.87057	-156.17982	Maui	Wild forest	Partially Obstructed	yes	15	A	0	23.3	66	73.2	26.3	205	2017-08-15	15:10:00	0	Unknown	https://storage.googleapis.com/elegansvariation.org/photos/hawaii2017/C-0750.thumb.jpg
PCR -	Leaf litter	NA	NA	C-0756	S-06441	Yes	Some (11-25)	21.175615	-157.008211	Molokai	Wild forest	Partially Obstructed	yes	19	A	3	21.8	64	89.6	22.6	491	2017-08-12	09:32:00	0	Unknown	https://storage.googleapis.com/elegansvariation.org/photos/hawaii2017/C-0756.thumb.jpg
PCR -	Leaf litter	NA	NA	C-0756	S-06442	Yes	Some (11-25)	21.175615	-157.008211	Molokai	Wild forest	Partially Obstructed	yes	19	A	3	21.8	64	89.6	22.6	491	2017-08-12	09:32:00	0	Unknown	https://storage.googleapis.com/elegansvariation.org/photos/hawaii2017/C-0756.thumb.jpg
PCR -	Leaf litter	NA	NA	C-0759	S-06499	Yes	Few (4-10)	21.1770063	-157.0053879	Molokai	Wild forest	Partially Obstructed	yes	18	B	3	20.4	66.5	85.9	22.2	489	2017-08-12	08:39:00	0	Unknown	https://storage.googleapis.com/elegansvariation.org/photos/hawaii2017/C-0759.thumb.jpg
PCR -	Leaf litter	NA	NA	C-0759	S-06500	Yes	Few (4-10)	21.1770063	-157.0053879	Molokai	Wild forest	Partially Obstructed	yes	18	B	3	20.4	66.5	85.9	22.2	489	2017-08-12	08:39:00	0	Unknown	https://storage.googleapis.com/elegansvariation.org/photos/hawaii2017/C-0759.thumb.jpg
PCR -	Leaf litter	NA	NA	C-0762	S-05646	Yes	Few (4-10)	21.177108	-157.005667	Molokai	Wild forest	Partially Obstructed	yes	18	C	2	20.9	67	87.3	22.2	502.1644737	2017-08-12	08:41:00	0	Unknown	https://storage.googleapis.com/elegansvariation.org/photos/hawaii2017/C-0762.thumb.jpg
PCR -	Leaf litter	NA	NA	C-0762	S-05652	Yes	Few (4-10)	21.177108	-157.005667	Molokai	Wild forest	Partially Obstructed	yes	18	C	2	20.9	67	87.3	22.2	502.1644737	2017-08-12	08:41:00	0	Unknown	https://storage.googleapis.com/elegansvariation.org/photos/hawaii2017/C-0762.thumb.jpg
PCR -	Leaf litter	NA	NA	C-0764	S-06478	Yes	Very Few (1-3)	21.177017	-157.005458	Molokai	Wild forest	Partially Obstructed	yes	18	E	3	21.5	62	86.3	21.5	498	2017-08-12	08:47:00	0	Unknown	https://storage.googleapis.com/elegansvariation.org/photos/hawaii2017/C-0764.thumb.jpg
PCR -	Leaf litter	NA	NA	C-0770	S-06488	Yes	Few (4-10)	21.177047	-157.005414	Molokai	Wild forest	Partially Obstructed	yes	18	E	2	21.7	60.5	86.3	21.5	490.8519313	2017-08-12	08:47:00	0	Unknown	https://storage.googleapis.com/elegansvariation.org/photos/hawaii2017/C-0770.thumb.jpg
PCR -	Leaf litter	NA	NA	C-0771	S-06451	Yes	Very Few (1-3)	21.175636	-157.008215	Molokai	Wild forest	Partially Obstructed	yes	19	C	2	21.1	64.5	89.4	22.6	491	2017-08-12	09:37:00	0	Unknown	https://storage.googleapis.com/elegansvariation.org/photos/hawaii2017/C-0771.thumb.jpg
PCR -	Leaf litter	NA	NA	C-0772	S-06469	Yes	Few (4-10)	21.151286	-156.998814	Molokai	Wild forest	Partially Obstructed	yes	18	A	2	21.6	65.5	79.6	23.3	530.6057692	2017-08-12	08:36:00	0	Unknown	https://storage.googleapis.com/elegansvariation.org/photos/hawaii2017/C-0772.thumb.jpg
PCR -	Leaf litter	NA	NA	C-0772	S-06473	Yes	Few (4-10)	21.151286	-156.998814	Molokai	Wild forest	Partially Obstructed	yes	18	A	2	21.6	65.5	79.6	23.3	530.6057692	2017-08-12	08:36:00	0	Unknown	https://storage.googleapis.com/elegansvariation.org/photos/hawaii2017/C-0772.thumb.jpg
PCR -	Fruit	NA	NA	C-0775	S-06464	Yes	Very Few (1-3)	21.175608	-157.008133	Molokai	Wild forest	Partially Obstructed	yes	19	D	2	21.2	62.8	89.2	22.6	491	2017-08-12	09:40:00	0	Unknown	https://storage.googleapis.com/elegansvariation.org/photos/hawaii2017/C-0775.thumb.jpg
PCR -	Leaf litter	NA	NA	C-0779	S-06449	Yes	Very Few (1-3)	21.175639	-157.008233	Molokai	Wild forest	Partially Obstructed	yes	19	B	2	21.7	52	92.6	21.9	491	2017-08-12	09:35:00	0	Unknown	https://storage.googleapis.com/elegansvariation.org/photos/hawaii2017/C-0779.thumb.jpg
PCR -	Leaf litter	NA	NA	C-0782	S-05609	Yes	Some (11-25)	22.081678	-159.426006	Kauai	Wild forest	Partially Obstructed	yes	8	B	3	22.1	67	75.6	25.6	282.3812155	2017-08-09	11:33:00	0	Unknown	https://storage.googleapis.com/elegansvariation.org/photos/hawaii2017/C-0782.thumb.jpg
PCR -	Leaf litter	NA	NA	C-0782	S-05610	Yes	Some (11-25)	22.081678	-159.426006	Kauai	Wild forest	Partially Obstructed	yes	8	B	3	22.1	67	75.6	25.6	282.3812155	2017-08-09	11:33:00	0	Unknown	https://storage.googleapis.com/elegansvariation.org/photos/hawaii2017/C-0782.thumb.jpg
PCR -	Leaf litter	NA	NA	C-0787	S-05643	Yes	Very Few (1-3)	22.081661	-159.425983	Kauai	Wild forest	Partially Obstructed	yes	8	B	2	22.1	66	77.8	24.9	279.1784387	2017-08-09	11:34:00	0	Unknown	https://storage.googleapis.com/elegansvariation.org/photos/hawaii2017/C-0787.thumb.jpg
PCR -	Leaf litter	NA	NA	C-0787	S-05648	Yes	Very Few (1-3)	22.081661	-159.425983	Kauai	Wild forest	Partially Obstructed	yes	8	B	2	22.1	66	77.8	24.9	279.1784387	2017-08-09	11:34:00	0	Unknown	https://storage.googleapis.com/elegansvariation.org/photos/hawaii2017/C-0787.thumb.jpg
PCR -	Leaf litter	NA	NA	C-0788	S-05198	Yes	Some (11-25)	22.081647	-159.426003	Kauai	Wild forest	Partially Obstructed	yes	8	A	2	21.7	67	80.5	24.9	276.6506024	2017-08-09	11:26:00	0	Unknown	https://storage.googleapis.com/elegansvariation.org/photos/hawaii2017/C-0788.thumb.jpg
PCR -	Leaf litter	NA	NA	C-0788	S-05199	Yes	Some (11-25)	22.081647	-159.426003	Kauai	Wild forest	Partially Obstructed	yes	8	A	2	21.7	67	80.5	24.9	276.6506024	2017-08-09	11:26:00	0	Unknown	https://storage.googleapis.com/elegansvariation.org/photos/hawaii2017/C-0788.thumb.jpg
PCR -	Leaf litter	NA	NA	C-0792	S-07519	Yes	Some (11-25)	22.081633	-159.425992	Kauai	Wild forest	Partially Obstructed	yes	8	F	1	22	65	81.4	24.9	272.6217617	2017-08-09	11:27:00	0	Unknown	https://storage.googleapis.com/elegansvariation.org/photos/hawaii2017/C-0792.thumb.jpg
PCR -	Leaf litter	NA	NA	C-0796	S-07507	Yes	Few (4-10)	22.081611	-159.425942	Kauai	Wild forest	Partially Obstructed	yes	8	E	2	21.5	64	81	24.9	271.1724138	2017-08-09	11:30:00	0	Unknown	https://storage.googleapis.com/elegansvariation.org/photos/hawaii2017/C-0796.thumb.jpg
PCR -	Leaf litter	NA	NA	C-0796	S-07508	Yes	Few (4-10)	22.081611	-159.425942	Kauai	Wild forest	Partially Obstructed	yes	8	E	2	21.5	64	81	24.9	271.1724138	2017-08-09	11:30:00	0	Unknown	https://storage.googleapis.com/elegansvariation.org/photos/hawaii2017/C-0796.thumb.jpg
PCR -	Leaf litter	NA	NA	C-0812	S-05358	Yes	Very Few (1-3)	22.149092	-159.641442	Kauai	Wild forest	Partially Obstructed	yes	5	A	3	18.3	43.5	71.1	21.2	1250.342593	2017-08-08	09:55:00	0	Unknown	https://storage.googleapis.com/elegansvariation.org/photos/hawaii2017/C-0812.thumb.jpg
PCR -	Leaf litter	NA	NA	C-0912	S-06707	Yes	Few (4-10)	20.874467	-156.1857636	Maui	Wild forest	Partially Obstructed	yes	15	C	2	22.1	66	75.6	25.6	223	2017-08-15	15:29:00	0	Unknown	https://storage.googleapis.com/elegansvariation.org/photos/hawaii2017/C-0912.thumb.jpg
PCR -	Leaf litter	NA	NA	C-0912	S-06718	Yes	Few (4-10)	20.874467	-156.1857636	Maui	Wild forest	Partially Obstructed	yes	15	C	2	22.1	66	75.6	25.6	223	2017-08-15	15:29:00	0	Unknown	https://storage.googleapis.com/elegansvariation.org/photos/hawaii2017/C-0912.thumb.jpg
PCR -	Leaf litter	NA	NA	C-0937	S-05739	Yes	Proliferating (25+)	22.194325	-159.478633	Kauai	Wild forest	Partially Obstructed	yes	11	A	0	22.5	60.5	76.1	25.666666666666668	198.8688525	2017-08-10	11:40:00	0	Unknown	https://storage.googleapis.com/elegansvariation.org/photos/hawaii2017/C-0937.thumb.jpg
PCR -	Leaf litter	NA	NA	C-0939	S-06724	Yes	Few (4-10)	20.79521364	-156.0758536	Maui	Wild forest	Partially Obstructed	yes	15	A	2	22.4	64	73.1	25.6	337	2017-08-15	15:25:00	0	Unknown	https://storage.googleapis.com/elegansvariation.org/photos/hawaii2017/C-0939.thumb.jpg
PCR -	Leaf litter	NA	NA	C-0950	S-05801	Yes	Proliferating (25+)	22.194369	-159.478586	Kauai	Wild forest	Partially Obstructed	yes	11	E	1	23.2	56	76.3	25.666666666666668	199.1995927	2017-08-10	11:38:00	0	Unknown	https://storage.googleapis.com/elegansvariation.org/photos/hawaii2017/C-0950.thumb.jpg
PCR -	Leaf litter	NA	NA	C-0950	S-05802	Yes	Proliferating (25+)	22.194369	-159.478586	Kauai	Wild forest	Partially Obstructed	yes	11	E	1	23.2	56	76.3	25.666666666666668	199.1995927	2017-08-10	11:38:00	0	Unknown	https://storage.googleapis.com/elegansvariation.org/photos/hawaii2017/C-0950.thumb.jpg
PCR -	Leaf litter	NA	NA	C-0954	S-05701	Yes	Proliferating (25+)	22.194394	-159.478606	Kauai	Wild forest	Partially Obstructed	yes	11	D	2	23	62	76.1	25.666666666666668	198.6987179	2017-08-10	11:37:00	0	Unknown	https://storage.googleapis.com/elegansvariation.org/photos/hawaii2017/C-0954.thumb.jpg
PCR -	Leaf litter	NA	NA	C-0986	S-05759	Yes	Proliferating (25+)	22.194386	-159.478586	Kauai	Wild forest	Partially Obstructed	yes	11	B	3	23.7	65.5	77.9	26	191.2009569	2017-08-10	11:33:00	0	Unknown	https://storage.googleapis.com/elegansvariation.org/photos/hawaii2017/C-0986.thumb.jpg
PCR -	Leaf litter	NA	NA	C-0990	S-05920	Yes	Proliferating (25+)	22.194358	-159.478589	Kauai	Wild forest	Obstructed	yes	11	C	3	22.9	68	73.5	26	192.0246305	2017-08-10	11:35:00	0	Unknown	https://storage.googleapis.com/elegansvariation.org/photos/hawaii2017/C-0990.thumb.jpg
PCR -	Leaf litter	NA	NA	C-0990	S-05922	Yes	Proliferating (25+)	22.194358	-159.478589	Kauai	Wild forest	Obstructed	yes	11	C	3	22.9	68	73.5	26	192.0246305	2017-08-10	11:35:00	0	Unknown	https://storage.googleapis.com/elegansvariation.org/photos/hawaii2017/C-0990.thumb.jpg
PCR -	Leaf litter	NA	NA	C-0991	X-011	Yes	Very Few (1-3)	22.121917	-159.664394	Kauai	Wild forest	Partially Obstructed	yes	12	F	3	18.8	49	83.3	20.5	1117.138211	2017-08-11	14:09:00	0	Unknown	https://storage.googleapis.com/elegansvariation.org/photos/hawaii2017/C-0991.thumb.jpg
PCR -	Leaf litter	NA	NA	C-0991	X-012	Yes	Very Few (1-3)	22.121917	-159.664394	Kauai	Wild forest	Partially Obstructed	yes	12	F	3	18.8	49	83.3	20.5	1117.138211	2017-08-11	14:09:00	0	Unknown	https://storage.googleapis.com/elegansvariation.org/photos/hawaii2017/C-0991.thumb.jpg
PCR -	Leaf litter	NA	NA	C-1061	S-05803	Yes	Proliferating (25+)	22.131542	-159.660528	Kauai	Wild forest	Partially Obstructed	yes	10	F	1	18.7	55.5	63	22.6	1158.028409	2017-08-10	11:28:00	0	Unknown	https://storage.googleapis.com/elegansvariation.org/photos/hawaii2017/C-1061.thumb.jpg
PCR -	Leaf litter	NA	NA	C-1061	S-05804	Yes	Proliferating (25+)	22.131542	-159.660528	Kauai	Wild forest	Partially Obstructed	yes	10	F	1	18.7	55.5	63	22.6	1158.028409	2017-08-10	11:28:00	0	Unknown	https://storage.googleapis.com/elegansvariation.org/photos/hawaii2017/C-1061.thumb.jpg
PCR -	Leaf litter	NA	NA	C-1066	S-05218	Yes	Some (11-25)	22.052375	-159.408808	Kauai	Wild forest	Partially Obstructed	yes	7	B	3	25.5	69.5	71.9	27.4	160.38316355	2017-08-09	10:48:00	0	Unknown	https://storage.googleapis.com/elegansvariation.org/photos/hawaii2017/C-1066.thumb.jpg
PCR -	Leaf litter	NA	NA	C-1067	S-05193	Yes	Few (4-10)	22.071367	-159.417481	Kauai	Wild forest	Partially Obstructed	yes	7	A	2	25.3	69	68	28.1	159.182243	2017-08-09	10:45:00	0	Unknown	https://storage.googleapis.com/elegansvariation.org/photos/hawaii2017/C-1067.thumb.jpg
PCR -	Leaf litter	NA	NA	C-1067	S-05194	Yes	Few (4-10)	22.071367	-159.417481	Kauai	Wild forest	Partially Obstructed	yes	7	A	2	25.3	69	68	28.1	159.182243	2017-08-09	10:45:00	0	Unknown	https://storage.googleapis.com/elegansvariation.org/photos/hawaii2017/C-1067.thumb.jpg
PCR -	Leaf litter	NA	NA	C-1069	S-05207	Yes	Few (4-10)	22.071381	-159.417508	Kauai	Wild forest	Partially Obstructed	yes	7	A	3	24.9	70.5	71.1	27.4	155.2410714	2017-08-09	10:44:00	0	Unknown	https://storage.googleapis.com/elegansvariation.org/photos/hawaii2017/C-1069.thumb.jpg
PCR -	Leaf litter	NA	NA	C-1069	S-05215	Yes	Few (4-10)	22.071381	-159.417508	Kauai	Wild forest	Partially Obstructed	yes	7	A	3	24.9	70.5	71.1	27.4	155.2410714	2017-08-09	10:44:00	0	Unknown	https://storage.googleapis.com/elegansvariation.org/photos/hawaii2017/C-1069.thumb.jpg
PCR -	Leaf litter	NA	NA	C-1069	S-05216	Yes	Few (4-10)	22.071381	-159.417508	Kauai	Wild forest	Partially Obstructed	yes	7	A	3	24.9	70.5	71.1	27.4	155.2410714	2017-08-09	10:44:00	0	Unknown	https://storage.googleapis.com/elegansvariation.org/photos/hawaii2017/C-1069.thumb.jpg
PCR -	Leaf litter	NA	NA	C-1069	S-05240	Yes	Few (4-10)	22.071381	-159.417508	Kauai	Wild forest	Partially Obstructed	yes	7	A	3	24.9	70.5	71.1	27.4	155.2410714	2017-08-09	10:44:00	0	Unknown	https://storage.googleapis.com/elegansvariation.org/photos/hawaii2017/C-1069.thumb.jpg
PCR -	Leaf litter	NA	NA	C-1125	S-05755	Yes	Few (4-10)	22.194414	-159.478564	Kauai	Wild forest	Partially Obstructed	yes	11	B	1	23.2	56	75.1	25.666666666666668	197.9204545	2017-08-10	11:33:00	0	Unknown	https://storage.googleapis.com/elegansvariation.org/photos/hawaii2017/C-1125.thumb.jpg
PCR -	Leaf litter	NA	NA	C-1129	S-05931	Yes	Proliferating (25+)	22.194378	-159.478628	Kauai	Wild forest	Partially Obstructed	yes	11	A	2	24.5	49	78.6	25.666666666666668	198.591623	2017-08-10	11:32:00	0	Unknown	https://storage.googleapis.com/elegansvariation.org/photos/hawaii2017/C-1129.thumb.jpg
PCR -	Leaf litter	NA	NA	C-1129	S-05932	Yes	Proliferating (25+)	22.194378	-159.478628	Kauai	Wild forest	Partially Obstructed	yes	11	A	2	24.5	49	78.6	25.666666666666668	198.591623	2017-08-10	11:32:00	0	Unknown	https://storage.googleapis.com/elegansvariation.org/photos/hawaii2017/C-1129.thumb.jpg
PCR -	Leaf litter	NA	NA	C-1319	S-06818	Yes	Very Few (1-3)	20.767981	-156.237814	Maui	Wild forest	Partially Obstructed	yes	16	D	3	11.2	27	89.7	13.3	2078	2017-08-16	15:54:00	0	Unknown	https://storage.googleapis.com/elegansvariation.org/photos/hawaii2017/C-1319.thumb.jpg
PCR -	Leaf litter	NA	NA	C-1328	S-06807	Yes	Few (4-10)	20.767736	-156.2371	Maui	Wild forest	Partially Obstructed	yes	16	B	1	12.7	52.5	83.4	14	2071.704918	2017-08-16	15:51:00	0	Unknown	https://storage.googleapis.com/elegansvariation.org/photos/hawaii2017/C-1328.thumb.jpg
PCR -	Leaf litter	NA	NA	C-1328	S-06808	Yes	Few (4-10)	20.767736	-156.2371	Maui	Wild forest	Partially Obstructed	yes	16	B	1	12.7	52.5	83.4	14	2071.704918	2017-08-16	15:51:00	0	Unknown	https://storage.googleapis.com/elegansvariation.org/photos/hawaii2017/C-1328.thumb.jpg
PCR -	Leaf litter	NA	NA	C-1328	S-06809	Yes	Few (4-10)	20.767736	-156.2371	Maui	Wild forest	Partially Obstructed	yes	16	B	1	12.7	52.5	83.4	14	2071.704918	2017-08-16	15:51:00	0	Unknown	https://storage.googleapis.com/elegansvariation.org/photos/hawaii2017/C-1328.thumb.jpg
PCR -	Leaf litter	NA	NA	C-1328	S-06810	Yes	Few (4-10)	20.767736	-156.2371	Maui	Wild forest	Partially Obstructed	yes	16	B	1	12.7	52.5	83.4	14	2071.704918	2017-08-16	15:51:00	0	Unknown	https://storage.googleapis.com/elegansvariation.org/photos/hawaii2017/C-1328.thumb.jpg
PCR -	Leaf litter	NA	NA	C-1328	S-06811	Yes	Few (4-10)	20.767736	-156.2371	Maui	Wild forest	Partially Obstructed	yes	16	B	1	12.7	52.5	83.4	14	2071.704918	2017-08-16	15:51:00	0	Unknown	https://storage.googleapis.com/elegansvariation.org/photos/hawaii2017/C-1328.thumb.jpg
PCR -	Leaf litter	NA	NA	C-1328	S-06812	Yes	Few (4-10)	20.767736	-156.2371	Maui	Wild forest	Partially Obstructed	yes	16	B	1	12.7	52.5	83.4	14	2071.704918	2017-08-16	15:51:00	0	Unknown	https://storage.googleapis.com/elegansvariation.org/photos/hawaii2017/C-1328.thumb.jpg
PCR -	Leaf litter	NA	NA	C-1342	S-06476	Yes	Few (4-10)	21.138065	-156.965931	Molokai	Wild forest	Partially Obstructed	yes	20	A	2	21.4	52	66.2	26	766	2017-08-12	12:22:00	0	Unknown	https://storage.googleapis.com/elegansvariation.org/photos/hawaii2017/C-1342.thumb.jpg
PCR -	Leaf litter	NA	NA	C-1342	S-06477	Yes	Few (4-10)	21.138065	-156.965931	Molokai	Wild forest	Partially Obstructed	yes	20	A	2	21.4	52	66.2	26	766	2017-08-12	12:22:00	0	Unknown	https://storage.googleapis.com/elegansvariation.org/photos/hawaii2017/C-1342.thumb.jpg
PCR -	Leaf litter	NA	NA	C-1362	S-06459	Yes	Very Few (1-3)	21.138045	-156.965889	Molokai	Wild forest	Partially Obstructed	yes	20	E	2	22	60.5	67.2	25.3	766	2017-08-12	12:30:00	0	Unknown	https://storage.googleapis.com/elegansvariation.org/photos/hawaii2017/C-1362.thumb.jpg
PCR -	Leaf litter	NA	NA	C-1378	S-06453	Yes	Proliferating (25+)	21.138014	-156.965892	Molokai	Wild forest	Partially Obstructed	yes	20	D	1	22.2	66	72	25.3	764.631769	2017-08-12	12:28:00	0	Unknown	https://storage.googleapis.com/elegansvariation.org/photos/hawaii2017/C-1378.thumb.jpg
PCR -	Leaf litter	NA	NA	C-1378	S-06454	Yes	Proliferating (25+)	21.138014	-156.965892	Molokai	Wild forest	Partially Obstructed	yes	20	D	1	22.2	66	72	25.3	764.631769	2017-08-12	12:28:00	0	Unknown	https://storage.googleapis.com/elegansvariation.org/photos/hawaii2017/C-1378.thumb.jpg
PCR -	Leaf litter	NA	NA	C-1378	S-06455	Yes	Proliferating (25+)	21.138014	-156.965892	Molokai	Wild forest	Partially Obstructed	yes	20	D	1	22.2	66	72	25.3	764.631769	2017-08-12	12:28:00	0	Unknown	https://storage.googleapis.com/elegansvariation.org/photos/hawaii2017/C-1378.thumb.jpg
PCR -	Leaf litter	NA	NA	C-1511	S-06961	Yes	Some (11-25)	20.6648	-156.048911	Maui	Wild forest	Partially Obstructed	yes	17	C	1	24.4	55.5	70.6	26.7	103.286036	2017-08-17	15:42:00	0	Unknown	https://storage.googleapis.com/elegansvariation.org/photos/hawaii2017/C-1511.thumb.jpg
PCR -	Leaf litter	NA	NA	C-1511	S-06962	Yes	Some (11-25)	20.6648	-156.048911	Maui	Wild forest	Partially Obstructed	yes	17	C	1	24.4	55.5	70.6	26.7	103.286036	2017-08-17	15:42:00	0	Unknown	https://storage.googleapis.com/elegansvariation.org/photos/hawaii2017/C-1511.thumb.jpg
PCR -	Leaf litter	NA	NA	C-1511	S-06963	Yes	Some (11-25)	20.6648	-156.048911	Maui	Wild forest	Partially Obstructed	yes	17	C	1	24.4	55.5	70.6	26.7	103.286036	2017-08-17	15:42:00	0	Unknown	https://storage.googleapis.com/elegansvariation.org/photos/hawaii2017/C-1511.thumb.jpg
PCR -	Leaf litter	NA	NA	C-1511	S-06974	Yes	Some (11-25)	20.6648	-156.048911	Maui	Wild forest	Partially Obstructed	yes	17	C	1	24.4	55.5	70.6	26.7	103.286036	2017-08-17	15:42:00	0	Unknown	https://storage.googleapis.com/elegansvariation.org/photos/hawaii2017/C-1511.thumb.jpg
PCR -	Leaf litter	NA	NA	C-1511	S-06975	Yes	Some (11-25)	20.6648	-156.048911	Maui	Wild forest	Partially Obstructed	yes	17	C	1	24.4	55.5	70.6	26.7	103.286036	2017-08-17	15:42:00	0	Unknown	https://storage.googleapis.com/elegansvariation.org/photos/hawaii2017/C-1511.thumb.jpg
PCR -	Leaf litter	NA	NA	C-1515	S-06922	Yes	Very Few (1-3)	20.664921	-156.04905	Maui	Wild forest	Partially Obstructed	yes	17	A	2	25.3	62.5	69.1	26.7	114	2017-08-17	15:38:00	0	Unknown	https://storage.googleapis.com/elegansvariation.org/photos/hawaii2017/C-1515.thumb.jpg
PCR -	Fruit	NA	NA	C-1517	S-06863	Yes	Few (4-10)	20.664919	-156.049025	Maui	Wild forest	Partially Obstructed	yes	17	B	2	23.7	51	70.5	26.7	114	2017-08-17	15:40:00	0	Unknown	https://storage.googleapis.com/elegansvariation.org/photos/hawaii2017/C-1517.thumb.jpg
PCR -	Fruit	NA	NA	C-1523	S-06954	Yes	Some (11-25)	20.66489	-156.04903	Maui	Wild forest	Partially Obstructed	yes	17	E	2	24.4	68	72.6	26.4	114	2017-08-17	15:47:00	0	Unknown	https://storage.googleapis.com/elegansvariation.org/photos/hawaii2017/C-1523.thumb.jpg
PCR -	Leaf litter	NA	NA	C-2527	S-06739	Yes	Few (4-10)	20.887489	-156.307192	Maui	Wild forest	Partially Obstructed	yes	15	A	1	23.1	60	73.1	25.6	200.1682692	2017-08-15	15:25:00	0	Unknown	https://storage.googleapis.com/elegansvariation.org/photos/hawaii2017/C-2527.thumb.jpg
PCR -	Leaf litter	NA	NA	C-2539	S-06627	Yes	Some (11-25)	20.875489	-156.193933	Maui	Wild forest	Partially Obstructed	yes	15	B	1	23.2	67	75.1	25.6	193.280303	2017-08-15	15:27:00	0	Unknown	https://storage.googleapis.com/elegansvariation.org/photos/hawaii2017/C-2539.thumb.jpg
PCR -	Leaf litter	NA	NA	C-2539	S-06628	Yes	Some (11-25)	20.875489	-156.193933	Maui	Wild forest	Partially Obstructed	yes	15	B	1	23.2	67	75.1	25.6	193.280303	2017-08-15	15:27:00	0	Unknown	https://storage.googleapis.com/elegansvariation.org/photos/hawaii2017/C-2539.thumb.jpg
PCR -	Leaf litter	NA	NA	C-2539	S-06629	Yes	Some (11-25)	20.875489	-156.193933	Maui	Wild forest	Partially Obstructed	yes	15	B	1	23.2	67	75.1	25.6	193.280303	2017-08-15	15:27:00	0	Unknown	https://storage.googleapis.com/elegansvariation.org/photos/hawaii2017/C-2539.thumb.jpg
PCR -	Leaf litter	NA	NA	C-2547	S-06744	Yes	Few (4-10)	20.886717	-156.299233	Maui	Wild forest	Partially Obstructed	yes	15	E	1	22.8	65	78.3	24.9	197.5632184	2017-08-15	15:35:00	0	Unknown	https://storage.googleapis.com/elegansvariation.org/photos/hawaii2017/C-2547.thumb.jpg
PCR -	Leaf litter	NA	NA	C-2591	S-06923	Yes	Very Few (1-3)	20.130853	-155.74039200000001	Maui	Wild forest	Partially Obstructed	yes	17	A	3	24.8	64.5	69.1	26.7	164.6699029	2017-08-17	13:31:00	0	Unknown	https://storage.googleapis.com/elegansvariation.org/photos/hawaii2017/C-2591.thumb.jpg
PCR -	Fruit	NA	NA	C-2593	S-06941	Yes	Proliferating (25+)	20.664903	-156.049008	Maui	Wild forest	Partially Obstructed	yes	17	D	3	24.4	67.5	73	26.7	100.0090498	2017-08-17	15:45:00	0	Unknown	https://storage.googleapis.com/elegansvariation.org/photos/hawaii2017/C-2593.thumb.jpg
PCR -	Leaf litter	NA	NA	C-2601	S-06881	Yes	Few (4-10)	20.664844	-156.049042	Maui	Wild forest	Partially Obstructed	yes	17	E	1	26	48	72.6	26.7	108.1885714	2017-08-17	15:47:00	0	Unknown	https://storage.googleapis.com/elegansvariation.org/photos/hawaii2017/C-2601.thumb.jpg
PCR -	Leaf litter	NA	NA	C-2601	S-06965	Yes	Few (4-10)	20.664844	-156.049042	Maui	Wild forest	Partially Obstructed	yes	17	E	1	26	48	72.6	26.7	108.1885714	2017-08-17	15:47:00	0	Unknown	https://storage.googleapis.com/elegansvariation.org/photos/hawaii2017/C-2601.thumb.jpg
PCR -	Leaf litter	NA	NA	C-2603	S-06973	Yes	Very Few (1-3)	20.664903	-156.049008	Maui	Wild forest	Partially Obstructed	yes	17	E	3	24.1	40	72.6	26.7	100.0090498	2017-08-17	15:47:00	0	Unknown	https://storage.googleapis.com/elegansvariation.org/photos/hawaii2017/C-2603.thumb.jpg
PCR -	Fruit	NA	NA	C-2604	S-06899	Yes	Some (11-25)	20.664919	-156.049008	Maui	Wild forest	Partially Obstructed	yes	17	B	3	24	64.5	70.5	26.7	103.5895652	2017-08-17	15:38:00	0	Unknown	https://storage.googleapis.com/elegansvariation.org/photos/hawaii2017/C-2604.thumb.jpg
PCR -	Leaf litter	NA	NA	C-2775	S-07643	Yes	Proliferating (25+)	20.036897	-155.441667	Big Island	Wild forest	Partially Obstructed	yes	2	F	1	20.4	67.5	78.5	22.6	691.091195	2017-08-17	14:12:00	0	Unknown	https://storage.googleapis.com/elegansvariation.org/photos/hawaii2017/C-2775.thumb.jpg
PCR -	Leaf litter	NA	NA	C-2775	S-07644	Yes	Proliferating (25+)	20.036897	-155.441667	Big Island	Wild forest	Partially Obstructed	yes	2	F	1	20.4	67.5	78.5	22.6	691.091195	2017-08-17	14:12:00	0	Unknown	https://storage.googleapis.com/elegansvariation.org/photos/hawaii2017/C-2775.thumb.jpg
PCR -	Leaf litter	NA	NA	C-2775	S-07647	Yes	Proliferating (25+)	20.036897	-155.441667	Big Island	Wild forest	Partially Obstructed	yes	2	F	1	20.4	67.5	78.5	22.6	691.091195	2017-08-17	14:12:00	0	Unknown	https://storage.googleapis.com/elegansvariation.org/photos/hawaii2017/C-2775.thumb.jpg
PCR -	Leaf litter	NA	NA	C-2776	S-07641	Yes	Proliferating (25+)	20.036847	-155.441706	Big Island	Wild forest	Partially Obstructed	yes	2	A	0	20.5	65.5	77.5	22.6	691.3174603	2017-08-17	14:13:00	0	Unknown	https://storage.googleapis.com/elegansvariation.org/photos/hawaii2017/C-2776.thumb.jpg
PCR -	Leaf litter	NA	NA	C-2776	S-07642	Yes	Proliferating (25+)	20.036847	-155.441706	Big Island	Wild forest	Partially Obstructed	yes	2	A	0	20.5	65.5	77.5	22.6	691.3174603	2017-08-17	14:13:00	0	Unknown	https://storage.googleapis.com/elegansvariation.org/photos/hawaii2017/C-2776.thumb.jpg
PCR -	Leaf litter	NA	NA	C-2776	S-07648	Yes	Proliferating (25+)	20.036847	-155.441706	Big Island	Wild forest	Partially Obstructed	yes	2	A	0	20.5	65.5	77.5	22.6	691.3174603	2017-08-17	14:13:00	0	Unknown	https://storage.googleapis.com/elegansvariation.org/photos/hawaii2017/C-2776.thumb.jpg
PCR -	Leaf litter	NA	NA	C-2776	S-07649	Yes	Proliferating (25+)	20.036847	-155.441706	Big Island	Wild forest	Partially Obstructed	yes	2	A	0	20.5	65.5	77.5	22.6	691.3174603	2017-08-17	14:13:00	0	Unknown	https://storage.googleapis.com/elegansvariation.org/photos/hawaii2017/C-2776.thumb.jpg
PCR -	Leaf litter	NA	NA	C-2777	S-07552	Yes	Few (4-10)	20.036956	-155.441722	Big Island	Wild forest	Partially Obstructed	yes	2	D	1	20.6	66	81.6	22.6	691.2105263	2017-08-17	14:10:00	0	Unknown	https://storage.googleapis.com/elegansvariation.org/photos/hawaii2017/C-2777.thumb.jpg
PCR -	Leaf litter	NA	NA	C-2777	S-07592	Yes	Few (4-10)	20.036956	-155.441722	Big Island	Wild forest	Partially Obstructed	yes	2	D	1	20.6	66	81.6	22.6	691.2105263	2017-08-17	14:10:00	0	Unknown	https://storage.googleapis.com/elegansvariation.org/photos/hawaii2017/C-2777.thumb.jpg
PCR -	Leaf litter	NA	NA	C-2777	S-07604	Yes	Few (4-10)	20.036956	-155.441722	Big Island	Wild forest	Partially Obstructed	yes	2	D	1	20.6	66	81.6	22.6	691.2105263	2017-08-17	14:10:00	0	Unknown	https://storage.googleapis.com/elegansvariation.org/photos/hawaii2017/C-2777.thumb.jpg
PCR -	Leaf litter	NA	NA	C-2777	S-07640	Yes	Few (4-10)	20.036956	-155.441722	Big Island	Wild forest	Partially Obstructed	yes	2	D	1	20.6	66	81.6	22.6	691.2105263	2017-08-17	14:10:00	0	Unknown	https://storage.googleapis.com/elegansvariation.org/photos/hawaii2017/C-2777.thumb.jpg
PCR -	Leaf litter	NA	NA	C-2778	S-07542	Yes	Few (4-10)	20.0369	-155.441764	Big Island	Wild forest	Partially Obstructed	yes	2	E	1	20.6	67	78.4	22.6	691.3892617	2017-08-17	14:11:00	0	Unknown	https://storage.googleapis.com/elegansvariation.org/photos/hawaii2017/C-2778.thumb.jpg
PCR -	Leaf litter	NA	NA	C-2778	S-07554	Yes	Few (4-10)	20.0369	-155.441764	Big Island	Wild forest	Partially Obstructed	yes	2	E	1	20.6	67	78.4	22.6	691.3892617	2017-08-17	14:11:00	0	Unknown	https://storage.googleapis.com/elegansvariation.org/photos/hawaii2017/C-2778.thumb.jpg
PCR -	Leaf litter	NA	NA	C-2778	S-07556	Yes	Few (4-10)	20.0369	-155.441764	Big Island	Wild forest	Partially Obstructed	yes	2	E	1	20.6	67	78.4	22.6	691.3892617	2017-08-17	14:11:00	0	Unknown	https://storage.googleapis.com/elegansvariation.org/photos/hawaii2017/C-2778.thumb.jpg
PCR -	Leaf litter	NA	NA	C-2778	S-07583	Yes	Few (4-10)	20.0369	-155.441764	Big Island	Wild forest	Partially Obstructed	yes	2	E	1	20.6	67	78.4	22.6	691.3892617	2017-08-17	14:11:00	0	Unknown	https://storage.googleapis.com/elegansvariation.org/photos/hawaii2017/C-2778.thumb.jpg
PCR -	Leaf litter	NA	NA	C-2779	S-07229	Yes	Some (11-25)	20.036858	-155.441725	Big Island	Wild forest	Partially Obstructed	yes	2	E	2	20.6	67.5	79.8	22.6	691.5008726	2017-08-17	14:12:00	0	Unknown	https://storage.googleapis.com/elegansvariation.org/photos/hawaii2017/C-2779.thumb.jpg
PCR -	Leaf litter	NA	NA	C-2779	S-07230	Yes	Some (11-25)	20.036858	-155.441725	Big Island	Wild forest	Partially Obstructed	yes	2	E	2	20.6	67.5	79.8	22.6	691.5008726	2017-08-17	14:12:00	0	Unknown	https://storage.googleapis.com/elegansvariation.org/photos/hawaii2017/C-2779.thumb.jpg
PCR -	Leaf litter	NA	NA	C-2779	S-07231	Yes	Some (11-25)	20.036858	-155.441725	Big Island	Wild forest	Partially Obstructed	yes	2	E	2	20.6	67.5	79.8	22.6	691.5008726	2017-08-17	14:12:00	0	Unknown	https://storage.googleapis.com/elegansvariation.org/photos/hawaii2017/C-2779.thumb.jpg
PCR -	Leaf litter	NA	NA	C-2779	S-07320	Yes	Some (11-25)	20.036858	-155.441725	Big Island	Wild forest	Partially Obstructed	yes	2	E	2	20.6	67.5	79.8	22.6	691.5008726	2017-08-17	14:12:00	0	Unknown	https://storage.googleapis.com/elegansvariation.org/photos/hawaii2017/C-2779.thumb.jpg
PCR -	Leaf litter	NA	NA	C-2780	S-07523	Yes	Very Few (1-3)	20.036947	-155.441736	Big Island	Wild forest	Partially Obstructed	yes	2	C	1	20.5	65	80.6	22.6	691.1422222	2017-08-17	14:09:00	0	Unknown	https://storage.googleapis.com/elegansvariation.org/photos/hawaii2017/C-2780.thumb.jpg
PCR -	Leaf litter	NA	NA	C-2780	S-07524	Yes	Very Few (1-3)	20.036947	-155.441736	Big Island	Wild forest	Partially Obstructed	yes	2	C	1	20.5	65	80.6	22.6	691.1422222	2017-08-17	14:09:00	0	Unknown	https://storage.googleapis.com/elegansvariation.org/photos/hawaii2017/C-2780.thumb.jpg
PCR -	Leaf litter	NA	NA	C-2780	S-07568	Yes	Very Few (1-3)	20.036947	-155.441736	Big Island	Wild forest	Partially Obstructed	yes	2	C	1	20.5	65	80.6	22.6	691.1422222	2017-08-17	14:09:00	0	Unknown	https://storage.googleapis.com/elegansvariation.org/photos/hawaii2017/C-2780.thumb.jpg
PCR -	Leaf litter	NA	NA	C-2782	S-07521	Yes	Very Few (1-3)	20.036925	-155.441711	Big Island	Wild forest	Partially Obstructed	yes	2	B	1	21	62	77.4	22.6	691.1609195	2017-08-17	14:08:00	0	Unknown	https://storage.googleapis.com/elegansvariation.org/photos/hawaii2017/C-2782.thumb.jpg
PCR -	Leaf litter	NA	NA	C-2783	S-07549	Yes	Very Few (1-3)	20.036894	-155.441717	Big Island	Wild forest	Partially Obstructed	yes	2	B	2	21	68.5	79.9	22.6	691.2393162	2017-08-17	14:09:00	0	Unknown	https://storage.googleapis.com/elegansvariation.org/photos/hawaii2017/C-2783.thumb.jpg
PCR -	Leaf litter	NA	NA	C-2783	S-07610	Yes	Very Few (1-3)	20.036894	-155.441717	Big Island	Wild forest	Partially Obstructed	yes	2	B	2	21	68.5	79.9	22.6	691.2393162	2017-08-17	14:09:00	0	Unknown	https://storage.googleapis.com/elegansvariation.org/photos/hawaii2017/C-2783.thumb.jpg
PCR -	Leaf litter	NA	NA	C-2812	S-06319	Yes	Very Few (1-3)	19.4239	-155.222514	Big Island	Rural garden	Partially Obstructed	yes	1	A	3	17	68	94	18.5	1118.70566	2017-08-14	07:57:00	0	Unknown	https://storage.googleapis.com/elegansvariation.org/photos/hawaii2017/C-2812.thumb.jpg
PCR -	Fruit	NA	NA	C-2824	S-07419	Yes	Few (4-10)	20.039858	-155.441608	Big Island	Wild forest	Partially Obstructed	yes	3	E	2	20.6	NA	83.1	22.6	670.8930041	2017-08-17	14:56:00	0	Unknown	https://storage.googleapis.com/elegansvariation.org/photos/hawaii2017/C-2824.thumb.jpg
PCR -	Leaf litter	NA	NA	C-2828	S-07314	Yes	Some (11-25)	20.039869	-155.441619	Big Island	Wild forest	Partially Obstructed	yes	3	F	3	21.2	67.5	84.2	22.6	670.8197674	2017-08-17	14:57:00	0	Unknown	https://storage.googleapis.com/elegansvariation.org/photos/hawaii2017/C-2828.thumb.jpg
PCR -	Leaf litter	NA	NA	C-2828	S-07336	Yes	Some (11-25)	20.039869	-155.441619	Big Island	Wild forest	Partially Obstructed	yes	3	F	3	21.2	67.5	84.2	22.6	670.8197674	2017-08-17	14:57:00	0	Unknown	https://storage.googleapis.com/elegansvariation.org/photos/hawaii2017/C-2828.thumb.jpg
PCR -	Leaf litter	NA	NA	C-2832	S-07383	Yes	Some (11-25)	20.039844	-155.441644	Big Island	Wild forest	Partially Obstructed	yes	3	F	2	20.5	69	80.8	22.6	671.333887	2017-08-17	14:58:00	0	Unknown	https://storage.googleapis.com/elegansvariation.org/photos/hawaii2017/C-2832.thumb.jpg
PCR -	Leaf litter	NA	NA	C-2832	S-07397	Yes	Some (11-25)	20.039844	-155.441644	Big Island	Wild forest	Partially Obstructed	yes	3	F	2	20.5	69	80.8	22.6	671.333887	2017-08-17	14:58:00	0	Unknown	https://storage.googleapis.com/elegansvariation.org/photos/hawaii2017/C-2832.thumb.jpg
PCR -	Leaf litter	NA	NA	C-2844	S-07427	Yes	Few (4-10)	20.039903	-155.441597	Big Island	Wild forest	Partially Obstructed	yes	3	C	2	20.9	69	85.2	22.6	670.3394495	2017-08-17	14:54:00	0	Unknown	https://storage.googleapis.com/elegansvariation.org/photos/hawaii2017/C-2844.thumb.jpg
PCR -	Leaf litter	NA	NA	C-2844	S-07429	Yes	Few (4-10)	20.039903	-155.441597	Big Island	Wild forest	Partially Obstructed	yes	3	C	2	20.9	69	85.2	22.6	670.3394495	2017-08-17	14:54:00	0	Unknown	https://storage.googleapis.com/elegansvariation.org/photos/hawaii2017/C-2844.thumb.jpg
PCR -	Leaf litter	NA	NA	C-2856	S-07345	Yes	Some (11-25)	20.039914	-155.441556	Big Island	Wild forest	Partially Obstructed	yes	3	A	2	21.9	69	87.6	21.9	669.971831	2017-08-17	14:51:00	0	Unknown	https://storage.googleapis.com/elegansvariation.org/photos/hawaii2017/C-2856.thumb.jpg
PCR -	Leaf litter	NA	NA	C-2856	S-07356	Yes	Some (11-25)	20.039914	-155.441556	Big Island	Wild forest	Partially Obstructed	yes	3	A	2	21.9	69	87.6	21.9	669.971831	2017-08-17	14:51:00	0	Unknown	https://storage.googleapis.com/elegansvariation.org/photos/hawaii2017/C-2856.thumb.jpg
PCR -	Leaf litter	NA	NA	C-2875	S-07261	Yes	Few (4-10)	20.039903	-155.441594	Big Island	Wild forest	Partially Obstructed	yes	3	D	1	21.1	69	83.8	22.6	670.1843318	2017-08-17	14:54:00	0	Unknown	https://storage.googleapis.com/elegansvariation.org/photos/hawaii2017/C-2875.thumb.jpg
PCR -	Leaf litter	NA	NA	C-2875	S-07304	Yes	Few (4-10)	20.039903	-155.441594	Big Island	Wild forest	Partially Obstructed	yes	3	D	1	21.1	69	83.8	22.6	670.1843318	2017-08-17	14:54:00	0	Unknown	https://storage.googleapis.com/elegansvariation.org/photos/hawaii2017/C-2875.thumb.jpg
PCR -	Leaf litter	NA	NA	C-2879	S-07380	Yes	Few (4-10)	20.039864	-155.441644	Big Island	Wild forest	Partially Obstructed	yes	3	E	3	20.5	67	84.2	22.6	671.08125	2017-08-17	14:55:00	0	Unknown	https://storage.googleapis.com/elegansvariation.org/photos/hawaii2017/C-2879.thumb.jpg
PCR -	Leaf litter	NA	NA	C-2962	S-06209	Yes	Very Few (1-3)	19.423861	-155.222475	Big Island	Rural garden	Partially Obstructed	yes	1	D	2	14.8	71.5	94	18.5	1120.374853	2017-08-14	08:03:00	0	Unknown	https://storage.googleapis.com/elegansvariation.org/photos/hawaii2017/C-2962.thumb.jpg
PCR -	Leaf litter	NA	NA	C-3122	S-07227	Yes	Few (4-10)	20.038614	-155.439544	Big Island	Wild forest	Partially Obstructed	yes	3	A	3	22.5	69	87.1	21.9	660.1563981	2017-08-17	14:50:00	0	Unknown	https://storage.googleapis.com/elegansvariation.org/photos/hawaii2017/C-3122.thumb.jpg
PCR -	Leaf litter	NA	NA	C-3122	S-07334	Yes	Few (4-10)	20.038614	-155.439544	Big Island	Wild forest	Partially Obstructed	yes	3	A	3	22.5	69	87.1	21.9	660.1563981	2017-08-17	14:50:00	0	Unknown	https://storage.googleapis.com/elegansvariation.org/photos/hawaii2017/C-3122.thumb.jpg
PCR -	Leaf litter	NA	NA	C-3122	S-07335	Yes	Few (4-10)	20.038614	-155.439544	Big Island	Wild forest	Partially Obstructed	yes	3	A	3	22.5	69	87.1	21.9	660.1563981	2017-08-17	14:50:00	0	Unknown	https://storage.googleapis.com/elegansvariation.org/photos/hawaii2017/C-3122.thumb.jpg
PCR -	Leaf litter	NA	NA	C-3143	S-07635	Yes	Some (11-25)	20.039917	-155.441542	Big Island	Wild forest	Partially Obstructed	yes	3	D	2	19.8	68.5	80.9	22.6	655.4961832	2017-08-17	14:55:00	0	Unknown	https://storage.googleapis.com/elegansvariation.org/photos/hawaii2017/C-3143.thumb.jpg
PCR -	Leaf litter	NA	NA	C-3143	S-07637	Yes	Some (11-25)	20.039917	-155.441542	Big Island	Wild forest	Partially Obstructed	yes	3	D	2	19.8	68.5	80.9	22.6	655.4961832	2017-08-17	14:55:00	0	Unknown	https://storage.googleapis.com/elegansvariation.org/photos/hawaii2017/C-3143.thumb.jpg
PCR -	Leaf litter	NA	NA	C-3147	S-07262	Yes	Few (4-10)	20.039908	-155.441533	Big Island	Wild forest	Partially Obstructed	yes	3	D	3	18.5	69	79.9	23.3	654.7903226	2017-08-17	14:56:00	0	Unknown	https://storage.googleapis.com/elegansvariation.org/photos/hawaii2017/C-3147.thumb.jpg
PCR -	Leaf litter	NA	NA	C-3147	S-07317	Yes	Few (4-10)	20.039908	-155.441533	Big Island	Wild forest	Partially Obstructed	yes	3	D	3	18.5	69	79.9	23.3	654.7903226	2017-08-17	14:56:00	0	Unknown	https://storage.googleapis.com/elegansvariation.org/photos/hawaii2017/C-3147.thumb.jpg
PCR -	Leaf litter	NA	NA	C-3151	S-07529	Yes	Few (4-10)	20.039897	-155.441531	Big Island	Wild forest	Partially Obstructed	yes	3	C	1	19.8	67.5	81.9	22.6	656.5362319	2017-08-17	14:54:00	0	Unknown	https://storage.googleapis.com/elegansvariation.org/photos/hawaii2017/C-3151.thumb.jpg
PCR -	Leaf litter	NA	NA	C-3151	S-07535	Yes	Few (4-10)	20.039897	-155.441531	Big Island	Wild forest	Partially Obstructed	yes	3	C	1	19.8	67.5	81.9	22.6	656.5362319	2017-08-17	14:54:00	0	Unknown	https://storage.googleapis.com/elegansvariation.org/photos/hawaii2017/C-3151.thumb.jpg
PCR -	Fruit	NA	NA	C-3155	S-07416	Yes	Some (11-25)	20.039908	-155.441503	Big Island	Wild forest	Partially Obstructed	yes	3	B	2	21.5	NA	NA	NA	655.4036697	2017-08-17	14:53:00	0	Unknown	https://storage.googleapis.com/elegansvariation.org/photos/hawaii2017/C-3155.thumb.jpg
PCR -	Leaf litter	NA	NA	C-3189	S-07264	Yes	Some (11-25)	20.039869	-155.441464	Big Island	Wild forest	Partially Obstructed	yes	3	A	1	21.6	68.5	85.7	21.9	653.640118	2017-08-17	14:50:00	0	Unknown	https://storage.googleapis.com/elegansvariation.org/photos/hawaii2017/C-3189.thumb.jpg
PCR -	Leaf litter	NA	NA	C-3189	S-07319	Yes	Some (11-25)	20.039869	-155.441464	Big Island	Wild forest	Partially Obstructed	yes	3	A	1	21.6	68.5	85.7	21.9	653.640118	2017-08-17	14:50:00	0	Unknown	https://storage.googleapis.com/elegansvariation.org/photos/hawaii2017/C-3189.thumb.jpg
PCR -	Leaf litter	NA	NA	C-3193	S-07338	Yes	Few (4-10)	20.039886	-155.441525	Big Island	Wild forest	Partially Obstructed	yes	3	E	1	19.5	64.5	76.6	24	651.7148289	2017-08-17	14:56:00	0	Unknown	https://storage.googleapis.com/elegansvariation.org/photos/hawaii2017/C-3193.thumb.jpg
PCR -	Leaf litter	NA	NA	C-3193	S-07370	Yes	Few (4-10)	20.039886	-155.441525	Big Island	Wild forest	Partially Obstructed	yes	3	E	1	19.5	64.5	76.6	24	651.7148289	2017-08-17	14:56:00	0	Unknown	https://storage.googleapis.com/elegansvariation.org/photos/hawaii2017/C-3193.thumb.jpg
PCR -	Leaf litter	NA	NA	C-3193	S-07371	Yes	Few (4-10)	20.039886	-155.441525	Big Island	Wild forest	Partially Obstructed	yes	3	E	1	19.5	64.5	76.6	24	651.7148289	2017-08-17	14:56:00	0	Unknown	https://storage.googleapis.com/elegansvariation.org/photos/hawaii2017/C-3193.thumb.jpg
PCR -	Fruit	NA	NA	C-3197	S-07300	Yes	Some (11-25)	20.039886	-155.441531	Big Island	Wild forest	Partially Obstructed	yes	3	F	1	19.4	NA	76.5	23.3	651.980315	2017-08-17	14:57:00	0	Unknown	https://storage.googleapis.com/elegansvariation.org/photos/hawaii2017/C-3197.thumb.jpg
PCR -	Fruit	NA	NA	C-3197	S-07309	Yes	Some (11-25)	20.039886	-155.441531	Big Island	Wild forest	Partially Obstructed	yes	3	F	1	19.4	NA	76.5	23.3	651.980315	2017-08-17	14:57:00	0	Unknown	https://storage.googleapis.com/elegansvariation.org/photos/hawaii2017/C-3197.thumb.jpg
PCR -	Fruit	NA	NA	C-3201	S-07377	Yes	Proliferating (25+)	20.039869	-155.441531	Big Island	Wild forest	Partially Obstructed	yes	3	A	0	19.4	NA	78.2	24	649.3469388	2017-08-17	14:58:00	0	Unknown	https://storage.googleapis.com/elegansvariation.org/photos/hawaii2017/C-3201.thumb.jpg
PCR -	Fruit	NA	NA	C-3201	S-07389	Yes	Proliferating (25+)	20.039869	-155.441531	Big Island	Wild forest	Partially Obstructed	yes	3	A	0	19.4	NA	78.2	24	649.3469388	2017-08-17	14:58:00	0	Unknown	https://storage.googleapis.com/elegansvariation.org/photos/hawaii2017/C-3201.thumb.jpg
PCR -	Leaf litter	NA	NA	C-3304	S-07677	Yes	Few (4-10)	20.036883	-155.441736	Big Island	Wild forest	Partially Obstructed	yes	2	E	3	20.3	59	75.5	23.3	674.5319149	2017-08-17	14:11:00	0	Unknown	https://storage.googleapis.com/elegansvariation.org/photos/hawaii2017/C-3304.thumb.jpg
PCR -	Leaf litter	NA	NA	C-3312	S-07585	Yes	Some (11-25)	20.036886	-155.441697	Big Island	Wild forest	Partially Obstructed	yes	2	D	3	20.2	68	75	24	676.3317536	2017-08-17	14:10:00	0	Unknown	https://storage.googleapis.com/elegansvariation.org/photos/hawaii2017/C-3312.thumb.jpg
PCR -	Leaf litter	NA	NA	C-3312	S-07587	Yes	Some (11-25)	20.036886	-155.441697	Big Island	Wild forest	Partially Obstructed	yes	2	D	3	20.2	68	75	24	676.3317536	2017-08-17	14:10:00	0	Unknown	https://storage.googleapis.com/elegansvariation.org/photos/hawaii2017/C-3312.thumb.jpg
PCR -	Leaf litter	NA	NA	C-3312	S-07589	Yes	Some (11-25)	20.036886	-155.441697	Big Island	Wild forest	Partially Obstructed	yes	2	D	3	20.2	68	75	24	676.3317536	2017-08-17	14:10:00	0	Unknown	https://storage.googleapis.com/elegansvariation.org/photos/hawaii2017/C-3312.thumb.jpg
PCR -	Leaf litter	NA	NA	C-3320	S-07597	Yes	Proliferating (25+)	20.036861	-155.441717	Big Island	Wild forest	Partially Obstructed	yes	2	A	2	20.6	68.5	78.5	22.6	675.7861272	2017-08-17	14:07:00	0	Unknown	https://storage.googleapis.com/elegansvariation.org/photos/hawaii2017/C-3320.thumb.jpg
PCR -	Leaf litter	NA	NA	C-3320	S-07600	Yes	Proliferating (25+)	20.036861	-155.441717	Big Island	Wild forest	Partially Obstructed	yes	2	A	2	20.6	68.5	78.5	22.6	675.7861272	2017-08-17	14:07:00	0	Unknown	https://storage.googleapis.com/elegansvariation.org/photos/hawaii2017/C-3320.thumb.jpg
PCR -	Leaf litter	NA	NA	C-3320	S-07611	Yes	Proliferating (25+)	20.036861	-155.441717	Big Island	Wild forest	Partially Obstructed	yes	2	A	2	20.6	68.5	78.5	22.6	675.7861272	2017-08-17	14:07:00	0	Unknown	https://storage.googleapis.com/elegansvariation.org/photos/hawaii2017/C-3320.thumb.jpg
PCR -	Leaf litter	NA	NA	C-3320	S-07612	Yes	Proliferating (25+)	20.036861	-155.441717	Big Island	Wild forest	Partially Obstructed	yes	2	A	2	20.6	68.5	78.5	22.6	675.7861272	2017-08-17	14:07:00	0	Unknown	https://storage.googleapis.com/elegansvariation.org/photos/hawaii2017/C-3320.thumb.jpg
PCR -	Leaf litter	NA	NA	C-3324	S-07555	Yes	Few (4-10)	20.036894	-155.441711	Big Island	Wild forest	Partially Obstructed	yes	2	A	1	21.3	67.5	79.4	22.6	676.9528302	2017-08-17	14:05:00	0	Unknown	https://storage.googleapis.com/elegansvariation.org/photos/hawaii2017/C-3324.thumb.jpg
PCR -	Leaf litter	NA	NA	C-3324	S-07584	Yes	Few (4-10)	20.036894	-155.441711	Big Island	Wild forest	Partially Obstructed	yes	2	A	1	21.3	67.5	79.4	22.6	676.9528302	2017-08-17	14:05:00	0	Unknown	https://storage.googleapis.com/elegansvariation.org/photos/hawaii2017/C-3324.thumb.jpg
PCR -	Leaf litter	NA	NA	C-3324	S-07588	Yes	Few (4-10)	20.036894	-155.441711	Big Island	Wild forest	Partially Obstructed	yes	2	A	1	21.3	67.5	79.4	22.6	676.9528302	2017-08-17	14:05:00	0	Unknown	https://storage.googleapis.com/elegansvariation.org/photos/hawaii2017/C-3324.thumb.jpg
PCR -	Leaf litter	NA	NA	C-3324	S-07591	Yes	Few (4-10)	20.036894	-155.441711	Big Island	Wild forest	Partially Obstructed	yes	2	A	1	21.3	67.5	79.4	22.6	676.9528302	2017-08-17	14:05:00	0	Unknown	https://storage.googleapis.com/elegansvariation.org/photos/hawaii2017/C-3324.thumb.jpg
Not genotyped	Leaf litter	NA	NA	C-0154	NA	Tracks	NA	22.131372	-159.660394	Kauai	Wild forest	Partially Obstructed	yes	6	A	3	17.7	40.5	77.8	19.5	1155.797101	2017-08-08	08:53:00	NA	NA	https://storage.googleapis.com/elegansvariation.org/photos/hawaii2017/C-0154.thumb.jpg
Not genotyped	Flower	NA	NA	C-0261	S-07497	Yes	Some (11-25)	22.081542	-159.426017	Kauai	Wild forest	Obstructed	yes	9	E	3	23.1	NA	79.5	24.9	280.1080139	2017-08-09	11:39:00	NA	NA	https://storage.googleapis.com/elegansvariation.org/photos/hawaii2017/C-0261.thumb.jpg
Not genotyped	Flower	NA	NA	C-0261	S-07511	Yes	Some (11-25)	22.081542	-159.426017	Kauai	Wild forest	Obstructed	yes	9	E	3	23.1	NA	79.5	24.9	280.1080139	2017-08-09	11:39:00	NA	NA	https://storage.googleapis.com/elegansvariation.org/photos/hawaii2017/C-0261.thumb.jpg
Not genotyped	Leaf litter	NA	NA	C-0262	S-05599	Yes	Few (4-10)	22.081506	-159.426217	Kauai	Wild forest	Obstructed	yes	9	F	3	22	64.5	77.1	24.9	282.74375	2017-08-09	11:40:00	NA	NA	https://storage.googleapis.com/elegansvariation.org/photos/hawaii2017/C-0262.thumb.jpg
Not genotyped	Leaf litter	NA	NA	C-0262	S-05606	Yes	Few (4-10)	22.081506	-159.426217	Kauai	Wild forest	Obstructed	yes	9	F	3	22	64.5	77.1	24.9	282.74375	2017-08-09	11:40:00	NA	NA	https://storage.googleapis.com/elegansvariation.org/photos/hawaii2017/C-0262.thumb.jpg
Not genotyped	Leaf litter	NA	NA	C-0271	S-07476	Yes	Few (4-10)	22.081467	-159.426286	Kauai	Wild forest	Obstructed	yes	9	D	2	23	59	77.5	24.9	281.0586957	2017-08-09	11:48:00	NA	NA	https://storage.googleapis.com/elegansvariation.org/photos/hawaii2017/C-0271.thumb.jpg
Not genotyped	Leaf litter	NA	NA	C-0275	S-05603	Yes	Few (4-10)	22.081447	-159.426214	Kauai	Wild forest	Obstructed	yes	9	C	3	22.2	68.5	79.8	24.9	281.8470255	2017-08-09	11:45:00	NA	NA	https://storage.googleapis.com/elegansvariation.org/photos/hawaii2017/C-0275.thumb.jpg
Not genotyped	Leaf litter	NA	NA	C-0287	S-07494	Yes	Few (4-10)	22.081397	-159.426083	Kauai	Wild forest	Obstructed	yes	9	A	2	22.1	67	76.1	26.3	287.0356234	2017-08-09	11:43:00	NA	NA	https://storage.googleapis.com/elegansvariation.org/photos/hawaii2017/C-0287.thumb.jpg
Not genotyped	Leaf litter	NA	NA	C-0288	S-07489	Yes	Few (4-10)	22.081539	-159.426136	Kauai	Wild forest	Obstructed	yes	9	A	3	22.1	69.5	80.4	25.6	287.6963907	2017-08-09	11:42:00	NA	NA	https://storage.googleapis.com/elegansvariation.org/photos/hawaii2017/C-0288.thumb.jpg
Not genotyped	Leaf litter	NA	NA	C-0291	S-07514	Yes	Very Few (1-3)	22.081581	-159.425928	Kauai	Wild forest	Obstructed	yes	9	E	1	22.9	67	79.5	24.9	283.2188552	2017-08-09	11:39:00	NA	NA	https://storage.googleapis.com/elegansvariation.org/photos/hawaii2017/C-0291.thumb.jpg
Not genotyped	Leaf litter	NA	NA	C-0293	S-07461	Yes	Few (4-10)	22.081589	-159.426014	Kauai	Wild forest	Partially Obstructed	yes	8	F	2	22.8	62	78.2	24.9	276.9055118	2017-08-09	11:28:00	NA	NA	https://storage.googleapis.com/elegansvariation.org/photos/hawaii2017/C-0293.thumb.jpg
Not genotyped	Leaf litter	NA	NA	C-0293	S-07462	Yes	Few (4-10)	22.081589	-159.426014	Kauai	Wild forest	Partially Obstructed	yes	8	F	2	22.8	62	78.2	24.9	276.9055118	2017-08-09	11:28:00	NA	NA	https://storage.googleapis.com/elegansvariation.org/photos/hawaii2017/C-0293.thumb.jpg
Not genotyped	Leaf litter	NA	NA	C-0293	S-07463	Yes	Few (4-10)	22.081589	-159.426014	Kauai	Wild forest	Partially Obstructed	yes	8	F	2	22.8	62	78.2	24.9	276.9055118	2017-08-09	11:28:00	NA	NA	https://storage.googleapis.com/elegansvariation.org/photos/hawaii2017/C-0293.thumb.jpg
Not genotyped	Leaf litter	NA	NA	C-0295	S-05529	Yes	Very Few (1-3)	22.081661	-159.425992	Kauai	Wild forest	Partially Obstructed	yes	8	C	1	22.7	66.5	74.1	25.6	276.4111111	2017-08-09	11:32:00	NA	NA	https://storage.googleapis.com/elegansvariation.org/photos/hawaii2017/C-0295.thumb.jpg
Not genotyped	Leaf litter	NA	NA	C-0295	S-05536	Yes	Very Few (1-3)	22.081661	-159.425992	Kauai	Wild forest	Partially Obstructed	yes	8	C	1	22.7	66.5	74.1	25.6	276.4111111	2017-08-09	11:32:00	NA	NA	https://storage.googleapis.com/elegansvariation.org/photos/hawaii2017/C-0295.thumb.jpg
Not genotyped	Leaf litter	NA	NA	C-0296	NA	Tracks	NA	22.081606	-159.426014	Kauai	Wild forest	Partially Obstructed	yes	8	A	0	22.8	64	75.1	25.6	283.4252874	2017-08-09	11:35:00	NA	NA	https://storage.googleapis.com/elegansvariation.org/photos/hawaii2017/C-0296.thumb.jpg
Not genotyped	Leaf litter	NA	NA	C-0298	S-05542	Yes	Few (4-10)	22.081633	-159.425944	Kauai	Wild forest	Partially Obstructed	yes	8	F	3	22.4	60	81.4	24.9	275.2277228	2017-08-09	11:27:00	NA	NA	https://storage.googleapis.com/elegansvariation.org/photos/hawaii2017/C-0298.thumb.jpg
Not genotyped	Leaf litter	NA	NA	C-0327	NA	Tracks	NA	20.949403	-156.535331	Maui	Wild forest	Partially Obstructed	yes	13	D	3	21.2	68.5	87.8	23.6	418.1606648	2017-08-13	15:39:00	NA	NA	https://storage.googleapis.com/elegansvariation.org/photos/hawaii2017/C-0327.thumb.jpg
Not genotyped	Leaf litter	NA	NA	C-0331	S-06528	Yes	Very Few (1-3)	20.949444	-156.535461	Maui	Wild forest	Partially Obstructed	yes	13	E	3	21.3	57	88.8	23.6	425.0687023	2017-08-13	15:41:00	NA	NA	https://storage.googleapis.com/elegansvariation.org/photos/hawaii2017/C-0331.thumb.jpg
Not genotyped	Leaf litter	NA	NA	C-0485	NA	Tracks	NA	22.149054	-159.64138	Kauai	Wild forest	Partially Obstructed	yes	5	C	1	17.2	28	69.1	20.5	1254	2017-08-08	10:03:00	NA	NA	https://storage.googleapis.com/elegansvariation.org/photos/hawaii2017/C-0485.thumb.jpg
Not genotyped	Leaf litter	NA	NA	C-0486	NA	Tracks	NA	22.149121	-159.641363	Kauai	Wild forest	Partially Obstructed	yes	5	C	2	17.1	34	69.1	20.5	1254	2017-08-08	10:02:00	NA	NA	https://storage.googleapis.com/elegansvariation.org/photos/hawaii2017/C-0486.thumb.jpg
Not genotyped	Leaf litter	NA	NA	C-0487	NA	Tracks	NA	22.149134	-159.641396	Kauai	Wild forest	Partially Obstructed	yes	5	B	2	17.9	35	70.2	20.5	1254	2017-08-08	09:59:00	NA	NA	https://storage.googleapis.com/elegansvariation.org/photos/hawaii2017/C-0487.thumb.jpg
Not genotyped	Leaf litter	NA	NA	C-0488	S-05487	Yes	Very Few (1-3)	22.149134	-159.641355	Kauai	Wild forest	Partially Obstructed	yes	5	A	1	17.9	34	68.4	21.2	1254	2017-08-08	09:56:00	NA	NA	https://storage.googleapis.com/elegansvariation.org/photos/hawaii2017/C-0488.thumb.jpg
Not genotyped	Leaf litter	NA	NA	C-0489	S-05498	Yes	Very Few (1-3)	22.1491113	-159.6413417	Kauai	Wild forest	Partially Obstructed	yes	5	B	1	17.5	36	70.5	20.5	1254	2017-08-08	10:00:00	NA	NA	https://storage.googleapis.com/elegansvariation.org/photos/hawaii2017/C-0489.thumb.jpg
Not genotyped	Leaf litter	NA	NA	C-0490	NA	Tracks	NA	22.149101	-159.641364	Kauai	Wild forest	Partially Obstructed	yes	5	E	2	17.1	27	72.6	21.2	1254	2017-08-08	10:08:00	NA	NA	https://storage.googleapis.com/elegansvariation.org/photos/hawaii2017/C-0490.thumb.jpg
Not genotyped	Leaf litter	NA	NA	C-0491	S-05490	Yes	Very Few (1-3)	22.149098	-159.641366	Kauai	Wild forest	Partially Obstructed	yes	5	E	1	17.7	13	72.1	21.2	1254	2017-08-08	10:07:00	NA	NA	https://storage.googleapis.com/elegansvariation.org/photos/hawaii2017/C-0491.thumb.jpg
Not genotyped	Leaf litter	NA	NA	C-0492	NA	Tracks	NA	22.149104	-159.641349	Kauai	Wild forest	Partially Obstructed	yes	5	D	2	17.3	35	73.5	20.7	1254	2017-08-08	10:06:00	NA	NA	https://storage.googleapis.com/elegansvariation.org/photos/hawaii2017/C-0492.thumb.jpg
Not genotyped	Leaf litter	NA	NA	C-0493	S-05506	Yes	Very Few (1-3)	22.1490685	-159.64133	Kauai	Wild forest	Partially Obstructed	yes	5	D	1	17.4	15	73.5	20.5	1254	2017-08-08	10:05:00	NA	NA	https://storage.googleapis.com/elegansvariation.org/photos/hawaii2017/C-0493.thumb.jpg
Not genotyped	Leaf litter	NA	NA	C-0522	NA	Tracks	NA	22.131483	-159.660422	Kauai	Wild forest	Partially Obstructed	yes	6	E	1	17.2	43.5	76	19.7	1150.415842	2017-08-08	08:58:00	NA	NA	https://storage.googleapis.com/elegansvariation.org/photos/hawaii2017/C-0522.thumb.jpg
Not genotyped	Leaf litter	NA	NA	C-0525	S-05441	Yes	Very Few (1-3)	22.131492	-159.660439	Kauai	Wild forest	Partially Obstructed	yes	6	C	2	17.4	50.5	76.6	18.8	1153.42623	2017-08-08	09:02:00	NA	NA	https://storage.googleapis.com/elegansvariation.org/photos/hawaii2017/C-0525.thumb.jpg
Not genotyped	Leaf litter	NA	NA	C-0525	S-05448	Yes	Very Few (1-3)	22.131492	-159.660439	Kauai	Wild forest	Partially Obstructed	yes	6	C	2	17.4	50.5	76.6	18.8	1153.42623	2017-08-08	09:02:00	NA	NA	https://storage.googleapis.com/elegansvariation.org/photos/hawaii2017/C-0525.thumb.jpg
Not genotyped	Leaf litter	NA	NA	C-0526	S-05478	Yes	Very Few (1-3)	22.1315	-159.660456	Kauai	Wild forest	Partially Obstructed	yes	6	B	1	17.5	45	76.6	19.5	1155.064286	2017-08-08	09:03:00	NA	NA	https://storage.googleapis.com/elegansvariation.org/photos/hawaii2017/C-0526.thumb.jpg
Not genotyped	Leaf litter	NA	NA	C-0563	NA	Tracks	NA	21.138192	-156.965661	Molokai	Wild forest	Partially Obstructed	yes	20	A	3	21.5	63	66.2	26	756.5766871	2017-08-12	12:22:00	NA	NA	https://storage.googleapis.com/elegansvariation.org/photos/hawaii2017/C-0563.thumb.jpg
Not genotyped	Leaf litter	NA	NA	C-0566	S-05303	Yes	Very Few (1-3)	22.1214994	-159.6641103	Kauai	Wild forest	Obstructed	yes	4	B	2	15.4	52.5	74.4	18.8	1121	2017-08-07	08:19:00	NA	NA	https://storage.googleapis.com/elegansvariation.org/photos/hawaii2017/C-0566.thumb.jpg
Not genotyped	Leaf litter	NA	NA	C-0569	S-05260	Yes	Very Few (1-3)	22.121844	-159.664492	Kauai	Wild forest	Partially Obstructed	yes	4	E	2	16.8	50.5	77.5	18.8	1115.05102	2017-08-07	08:25:00	NA	NA	https://storage.googleapis.com/elegansvariation.org/photos/hawaii2017/C-0569.thumb.jpg
Not genotyped	Leaf litter	NA	NA	C-0589	NA	Tracks	NA	22.121912	-159.664386	Kauai	Wild forest	Partially Obstructed	yes	4	F	3	16.5	NA	77.4	18.5	1121	2017-08-07	08:29:00	NA	NA	https://storage.googleapis.com/elegansvariation.org/photos/hawaii2017/C-0589.thumb.jpg
Not genotyped	Leaf litter	NA	NA	C-0601	S-05330	Yes	Very Few (1-3)	22.121886	-159.664394	Kauai	Wild forest	Partially Obstructed	yes	4	A	0	15.8	28	78.4	18.5	1141.348315	2017-08-07	08:27:00	NA	NA	https://storage.googleapis.com/elegansvariation.org/photos/hawaii2017/C-0601.thumb.jpg
Not genotyped	Leaf litter	NA	NA	C-0614	NA	Tracks	NA	22.121839	-159.664469	Kauai	Wild forest	Partially Obstructed	yes	4	A	1	15.7	38	71	19.5	1127.982906	2017-08-07	08:13:00	NA	NA	https://storage.googleapis.com/elegansvariation.org/photos/hawaii2017/C-0614.thumb.jpg
Not genotyped	Leaf litter	NA	NA	C-0620	S-06462	Yes	Very Few (1-3)	21.137994	-156.965933	Molokai	Wild forest	Partially Obstructed	yes	20	C	3	21.8	65	73.5	25.3	752.238806	2017-08-12	12:26:00	NA	NA	https://storage.googleapis.com/elegansvariation.org/photos/hawaii2017/C-0620.thumb.jpg
Not genotyped	Leaf litter	NA	NA	C-0626	S-05642	Yes	Very Few (1-3)	21.177153	-157.005386	Molokai	Wild forest	Partially Obstructed	yes	18	A	1	21.7	50	73.2	23.3	531.6826923	2017-08-12	08:36:00	NA	NA	https://storage.googleapis.com/elegansvariation.org/photos/hawaii2017/C-0626.thumb.jpg
Not genotyped	Leaf litter	NA	NA	C-0629	NA	Tracks	NA	21.175608	-157.008278	Molokai	Wild forest	Partially Obstructed	yes	19	C	3	20.9	59	89.4	22.6	495.076087	2017-08-12	09:38:00	NA	NA	https://storage.googleapis.com/elegansvariation.org/photos/hawaii2017/C-0629.thumb.jpg
Not genotyped	Leaf litter	NA	NA	C-0630	NA	Tracks	NA	21.175636	-157.008285	Molokai	Wild forest	Partially Obstructed	yes	19	E	2	21.1	66	82.8	24	491	2017-08-12	09:43:00	NA	NA	https://storage.googleapis.com/elegansvariation.org/photos/hawaii2017/C-0630.thumb.jpg
Not genotyped	Leaf litter	NA	NA	C-0634	NA	Tracks	NA	21.175678	-157.008278	Molokai	Wild forest	Partially Obstructed	yes	19	A	0	22.8	69.5	87.2	22.6	498.5283019	2017-08-12	09:29:00	NA	NA	https://storage.googleapis.com/elegansvariation.org/photos/hawaii2017/C-0634.thumb.jpg
Not genotyped	Leaf litter	NA	NA	C-0635	NA	Tracks	NA	21.175631	-157.008403	Molokai	Wild forest	Partially Obstructed	yes	19	E	3	21.2	60	82.8	24	496.2743902	2017-08-12	09:43:00	NA	NA	https://storage.googleapis.com/elegansvariation.org/photos/hawaii2017/C-0635.thumb.jpg
Not genotyped	Leaf litter	NA	NA	C-0636	S-06457	Yes	Very Few (1-3)	21.175561	-157.008278	Molokai	Wild forest	Partially Obstructed	yes	19	C	1	21.3	58.5	89.4	22.6	499.0214286	2017-08-12	09:37:00	NA	NA	https://storage.googleapis.com/elegansvariation.org/photos/hawaii2017/C-0636.thumb.jpg
Not genotyped	Leaf litter	NA	NA	C-0638	NA	Tracks	NA	21.175514	-157.008275	Molokai	Wild forest	Partially Obstructed	yes	19	D	1	21.4	64	89.2	22.6	499.1627907	2017-08-12	09:41:00	NA	NA	https://storage.googleapis.com/elegansvariation.org/photos/hawaii2017/C-0638.thumb.jpg
Not genotyped	Leaf litter	NA	NA	C-0641	NA	Tracks	NA	21.175617	-157.008225	Molokai	Wild forest	Partially Obstructed	yes	19	F	1	21.6	44.5	84.8	23.3	497.8331242	2017-08-12	09:46:00	NA	NA	https://storage.googleapis.com/elegansvariation.org/photos/hawaii2017/C-0641.thumb.jpg
Not genotyped	Leaf litter	NA	NA	C-0644	NA	Tracks	NA	21.176078	-157.00505	Molokai	Wild forest	Partially Obstructed	yes	19	B	1	21.4	64	92.6	21.9	508.9955357	2017-08-12	09:35:00	NA	NA	https://storage.googleapis.com/elegansvariation.org/photos/hawaii2017/C-0644.thumb.jpg
Not genotyped	Leaf litter	NA	NA	C-0646	NA	Tracks	NA	21.137981	-156.96595	Molokai	Wild forest	Partially Obstructed	yes	20	D	3	20.8	61.5	72	25.3	753.1030928	2017-08-12	12:28:00	NA	NA	https://storage.googleapis.com/elegansvariation.org/photos/hawaii2017/C-0646.thumb.jpg
Not genotyped	Leaf litter	NA	NA	C-0647	S-06450	Yes	Very Few (1-3)	21.176989	-157.005344	Molokai	Wild forest	Partially Obstructed	yes	18	C	1	22	53.5	87.3	22.2	522.6443769	2017-08-12	08:41:00	NA	NA	https://storage.googleapis.com/elegansvariation.org/photos/hawaii2017/C-0647.thumb.jpg
Not genotyped	Leaf litter	NA	NA	C-0648	S-06445	Yes	Very Few (1-3)	21.177225	-157.005483	Molokai	Wild forest	Partially Obstructed	yes	18	E	1	21.2	49.5	86.3	21.5	557.5041322	2017-08-12	08:47:00	NA	NA	https://storage.googleapis.com/elegansvariation.org/photos/hawaii2017/C-0648.thumb.jpg
Not genotyped	Leaf litter	NA	NA	C-0655	NA	Tracks	NA	22.131611	-159.660481	Kauai	Wild forest	Partially Obstructed	yes	6	D	2	16.4	55	78.4	19.183333333333334	1169.37931	2017-08-08	09:00:00	NA	NA	https://storage.googleapis.com/elegansvariation.org/photos/hawaii2017/C-0655.thumb.jpg
Not genotyped	Leaf litter	NA	NA	C-0656	S-05342	Yes	Very Few (1-3)	22.131533	-159.660475	Kauai	Wild forest	Partially Obstructed	yes	6	D	1	16.4	67	78.4	19.166666666666668	1170.22619	2017-08-08	08:59:00	NA	NA	https://storage.googleapis.com/elegansvariation.org/photos/hawaii2017/C-0656.thumb.jpg
Not genotyped	Leaf litter	NA	NA	C-0657	S-05391	Yes	Very Few (1-3)	22.13155	-159.660417	Kauai	Wild forest	Partially Obstructed	yes	6	E	2	16.5	59	78.4	19.166666666666668	1169.635593	2017-08-08	08:58:00	NA	NA	https://storage.googleapis.com/elegansvariation.org/photos/hawaii2017/C-0657.thumb.jpg
Not genotyped	Leaf litter	NA	NA	C-0657	S-05409	Yes	Very Few (1-3)	22.13155	-159.660417	Kauai	Wild forest	Partially Obstructed	yes	6	E	2	16.5	59	78.4	19.166666666666668	1169.635593	2017-08-08	08:58:00	NA	NA	https://storage.googleapis.com/elegansvariation.org/photos/hawaii2017/C-0657.thumb.jpg
Not genotyped	Leaf litter	NA	NA	C-0658	S-05455	Yes	Some (11-25)	22.131444	-159.660425	Kauai	Wild forest	Partially Obstructed	yes	6	E	3	16.7	51.5	78.4	19.166666666666668	1170.800305	2017-08-08	08:57:00	NA	NA	https://storage.googleapis.com/elegansvariation.org/photos/hawaii2017/C-0658.thumb.jpg
Not genotyped	Leaf litter	NA	NA	C-0658	S-05456	Yes	Some (11-25)	22.131444	-159.660425	Kauai	Wild forest	Partially Obstructed	yes	6	E	3	16.7	51.5	78.4	19.166666666666668	1170.800305	2017-08-08	08:57:00	NA	NA	https://storage.googleapis.com/elegansvariation.org/photos/hawaii2017/C-0658.thumb.jpg
Not genotyped	Leaf litter	NA	NA	C-0689	NA	Tracks	NA	22.131511	-159.660439	Kauai	Wild forest	Partially Obstructed	yes	6	F	3	17.1	35	76	19.7	1158.368794	2017-08-08	08:56:00	NA	NA	https://storage.googleapis.com/elegansvariation.org/photos/hawaii2017/C-0689.thumb.jpg
Not genotyped	Leaf litter	NA	NA	C-0696	S-05188	Yes	Few (4-10)	22.071294	-159.417508	Kauai	Wild forest	Partially Obstructed	yes	7	C	3	24.5	67.5	72.7	28.8	158.13	2017-08-09	10:52:00	NA	NA	https://storage.googleapis.com/elegansvariation.org/photos/hawaii2017/C-0696.thumb.jpg
Not genotyped	Leaf litter	NA	NA	C-0698	S-05645	Yes	Very Few (1-3)	22.071367	-159.417506	Kauai	Wild forest	Partially Obstructed	yes	7	C	1	24.1	68	72	27.4	157.8187135	2017-08-09	10:53:00	NA	NA	https://storage.googleapis.com/elegansvariation.org/photos/hawaii2017/C-0698.thumb.jpg
Not genotyped	Leaf litter	NA	NA	C-0699	S-05624	Yes	Very Few (1-3)	22.071358	-159.41745	Kauai	Wild forest	Partially Obstructed	yes	7	D	3	24.8	65.5	73	27.4	154.6869301	2017-08-09	10:55:00	NA	NA	https://storage.googleapis.com/elegansvariation.org/photos/hawaii2017/C-0699.thumb.jpg
Not genotyped	Leaf litter	NA	NA	C-0699	S-05625	Yes	Very Few (1-3)	22.071358	-159.41745	Kauai	Wild forest	Partially Obstructed	yes	7	D	3	24.8	65.5	73	27.4	154.6869301	2017-08-09	10:55:00	NA	NA	https://storage.googleapis.com/elegansvariation.org/photos/hawaii2017/C-0699.thumb.jpg
Not genotyped	Leaf litter	NA	NA	C-0700	NA	Tracks	NA	22.071342	-159.417442	Kauai	Wild forest	Partially Obstructed	yes	7	D	2	26.4	67.5	72.6	26.7	153.4562738	2017-08-09	10:56:00	NA	NA	https://storage.googleapis.com/elegansvariation.org/photos/hawaii2017/C-0700.thumb.jpg
Not genotyped	Leaf litter	NA	NA	C-0701	NA	Tracks	NA	22.071322	-159.417475	Kauai	Wild forest	Partially Obstructed	yes	7	D	1	24	67.5	72.3	27.4	155.3727273	2017-08-09	10:57:00	NA	NA	https://storage.googleapis.com/elegansvariation.org/photos/hawaii2017/C-0701.thumb.jpg
Not genotyped	Leaf litter	NA	NA	C-0703	S-05601	Yes	Very Few (1-3)	22.071339	-159.417489	Kauai	Wild forest	Partially Obstructed	yes	7	E	1	24.5	66	74.5	26.7	160.5887324	2017-08-09	11:00:00	NA	NA	https://storage.googleapis.com/elegansvariation.org/photos/hawaii2017/C-0703.thumb.jpg
Not genotyped	Leaf litter	NA	NA	C-0704	S-05237	Yes	Few (4-10)	22.07135	-159.417514	Kauai	Wild forest	Partially Obstructed	yes	7	E	2	24.8	60	71	27.4	157.199262	2017-08-09	10:59:00	NA	NA	https://storage.googleapis.com/elegansvariation.org/photos/hawaii2017/C-0704.thumb.jpg
Not genotyped	Leaf litter	NA	NA	C-0704	S-05239	Yes	Few (4-10)	22.07135	-159.417514	Kauai	Wild forest	Partially Obstructed	yes	7	E	2	24.8	60	71	27.4	157.199262	2017-08-09	10:59:00	NA	NA	https://storage.googleapis.com/elegansvariation.org/photos/hawaii2017/C-0704.thumb.jpg
Not genotyped	Flower	NA	NA	C-0705	S-05589	Yes	Few (4-10)	22.071314	-159.417575	Kauai	Wild forest	Partially Obstructed	yes	7	E	3	25.5	41	71.1	27.4	157.171123	2017-08-09	10:58:00	NA	NA	https://storage.googleapis.com/elegansvariation.org/photos/hawaii2017/C-0705.thumb.jpg
Not genotyped	Flower	NA	NA	C-0705	S-05590	Yes	Few (4-10)	22.071314	-159.417575	Kauai	Wild forest	Partially Obstructed	yes	7	E	3	25.5	41	71.1	27.4	157.171123	2017-08-09	10:58:00	NA	NA	https://storage.googleapis.com/elegansvariation.org/photos/hawaii2017/C-0705.thumb.jpg
Not genotyped	Leaf litter	NA	NA	C-0706	S-05583	Yes	Few (4-10)	22.071339	-159.417494	Kauai	Wild forest	Partially Obstructed	yes	7	F	2	25.6	66	69.6	28.8	161.9841772	2017-08-09	11:02:00	NA	NA	https://storage.googleapis.com/elegansvariation.org/photos/hawaii2017/C-0706.thumb.jpg
Not genotyped	Leaf litter	NA	NA	C-0706	S-05611	Yes	Few (4-10)	22.071339	-159.417494	Kauai	Wild forest	Partially Obstructed	yes	7	F	2	25.6	66	69.6	28.8	161.9841772	2017-08-09	11:02:00	NA	NA	https://storage.googleapis.com/elegansvariation.org/photos/hawaii2017/C-0706.thumb.jpg
Not genotyped	Leaf litter	NA	NA	C-0720	S-05192	Yes	Very Few (1-3)	22.071319	-159.417392	Kauai	Wild forest	Partially Obstructed	yes	7	F	1	25.3	64.5	73.2	28.8	158.7266187	2017-08-09	11:04:00	NA	NA	https://storage.googleapis.com/elegansvariation.org/photos/hawaii2017/C-0720.thumb.jpg
Not genotyped	Leaf litter	NA	NA	C-0720	S-05223	Yes	Very Few (1-3)	22.071319	-159.417392	Kauai	Wild forest	Partially Obstructed	yes	7	F	1	25.3	64.5	73.2	28.8	158.7266187	2017-08-09	11:04:00	NA	NA	https://storage.googleapis.com/elegansvariation.org/photos/hawaii2017/C-0720.thumb.jpg
Not genotyped	Leaf litter	NA	NA	C-0727	S-05354	Yes	Very Few (1-3)	22.131478	-159.660425	Kauai	Wild forest	Partially Obstructed	yes	6	F	1	16.4	55	78.4	19.166666666666668	1170.479452	2017-08-08	08:56:00	NA	NA	https://storage.googleapis.com/elegansvariation.org/photos/hawaii2017/C-0727.thumb.jpg
Not genotyped	Leaf litter	NA	NA	C-0728	NA	Tracks	NA	22.131475	-159.660453	Kauai	Wild forest	Partially Obstructed	yes	6	A	1	16.4	41	78	19.166666666666668	1170.733813	2017-08-08	08:54:00	NA	NA	https://storage.googleapis.com/elegansvariation.org/photos/hawaii2017/C-0728.thumb.jpg
Not genotyped	Leaf litter	NA	NA	C-0735	NA	Tracks	NA	21.138025	-156.965903	Molokai	Wild forest	Partially Obstructed	yes	20	F	2	21.3	66	71.6	24.7	766	2017-08-12	12:32:00	NA	NA	https://storage.googleapis.com/elegansvariation.org/photos/hawaii2017/C-0735.thumb.jpg
Not genotyped	Leaf litter	NA	NA	C-0755	NA	Tracks	NA	21.177075	-157.005463	Molokai	Wild forest	Partially Obstructed	yes	18	F	3	20.9	43	89.7	21.5	498	2017-08-12	08:49:00	NA	NA	https://storage.googleapis.com/elegansvariation.org/photos/hawaii2017/C-0755.thumb.jpg
Not genotyped	Leaf litter	NA	NA	C-0757	NA	Tracks	NA	21.177017	-157.005458	Molokai	Wild forest	Partially Obstructed	yes	18	D	3	22	29	86.3	22.2	498	2017-08-12	08:43:00	NA	NA	https://storage.googleapis.com/elegansvariation.org/photos/hawaii2017/C-0757.thumb.jpg
Not genotyped	Leaf litter	NA	NA	C-0760	S-06474	Yes	Some (11-25)	21.177024	-157.005394	Molokai	Wild forest	Partially Obstructed	yes	18	C	3	21.1	32.5	87.3	22.2	489	2017-08-12	08:41:00	NA	NA	https://storage.googleapis.com/elegansvariation.org/photos/hawaii2017/C-0760.thumb.jpg
Not genotyped	Leaf litter	NA	NA	C-0768	NA	Tracks	NA	21.177006	-157.005388	Molokai	Wild forest	Partially Obstructed	yes	18	A	3	21.7	60.5	73.6	23.3	489	2017-08-12	08:36:00	NA	NA	https://storage.googleapis.com/elegansvariation.org/photos/hawaii2017/C-0768.thumb.jpg
Not genotyped	Leaf litter	NA	NA	C-0770	S-06481	Yes	Few (4-10)	21.177047	-157.005414	Molokai	Wild forest	Partially Obstructed	yes	18	E	2	21.7	60.5	86.3	21.5	490.8519313	2017-08-12	08:47:00	NA	NA	https://storage.googleapis.com/elegansvariation.org/photos/hawaii2017/C-0770.thumb.jpg
Not genotyped	Leaf litter	NA	NA	C-0778	S-05649	Yes	Few (4-10)	21.177161	-157.005272	Molokai	Wild forest	Partially Obstructed	yes	18	B	2	20.7	66.5	85.9	22.2	536.7486034	2017-08-12	08:39:00	NA	NA	https://storage.googleapis.com/elegansvariation.org/photos/hawaii2017/C-0778.thumb.jpg
Not genotyped	Leaf litter	NA	NA	C-0778	S-06463	Yes	Few (4-10)	21.177161	-157.005272	Molokai	Wild forest	Partially Obstructed	yes	18	B	2	20.7	66.5	85.9	22.2	536.7486034	2017-08-12	08:39:00	NA	NA	https://storage.googleapis.com/elegansvariation.org/photos/hawaii2017/C-0778.thumb.jpg
Not genotyped	Leaf litter	NA	NA	C-0784	S-05546	Yes	Very Few (1-3)	22.081611	-159.425964	Kauai	Wild forest	Partially Obstructed	yes	8	D	1	22.1	55	78.5	24.9	276.8301887	2017-08-09	11:31:00	NA	NA	https://storage.googleapis.com/elegansvariation.org/photos/hawaii2017/C-0784.thumb.jpg
Not genotyped	Leaf litter	NA	NA	C-0785	S-05628	Yes	Very Few (1-3)	22.08160875	-159.4259925	Kauai	Wild forest	Partially Obstructed	yes	8	A	1	21.3	59.5	81.2	24.9	281	2017-08-09	11:24:00	NA	NA	https://storage.googleapis.com/elegansvariation.org/photos/hawaii2017/C-0785.thumb.jpg
Not genotyped	Leaf litter	NA	NA	C-0788	S-05210	Yes	Some (11-25)	22.081647	-159.426003	Kauai	Wild forest	Partially Obstructed	yes	8	A	2	21.7	67	80.5	24.9	276.6506024	2017-08-09	11:26:00	NA	NA	https://storage.googleapis.com/elegansvariation.org/photos/hawaii2017/C-0788.thumb.jpg
Not genotyped	Leaf litter	NA	NA	C-0792	S-07518	Yes	Some (11-25)	22.081633	-159.425992	Kauai	Wild forest	Partially Obstructed	yes	8	F	1	22	65	81.4	24.9	272.6217617	2017-08-09	11:27:00	NA	NA	https://storage.googleapis.com/elegansvariation.org/photos/hawaii2017/C-0792.thumb.jpg
Not genotyped	Leaf litter	NA	NA	C-0792	S-07520	Yes	Some (11-25)	22.081633	-159.425992	Kauai	Wild forest	Partially Obstructed	yes	8	F	1	22	65	81.4	24.9	272.6217617	2017-08-09	11:27:00	NA	NA	https://storage.googleapis.com/elegansvariation.org/photos/hawaii2017/C-0792.thumb.jpg
Not genotyped	Leaf litter	NA	NA	C-0811	NA	Tracks	NA	22.149108	-159.641369	Kauai	Wild forest	Partially Obstructed	yes	5	B	3	20.2	49	70.2	20.5	1250.666	2017-08-08	09:59:00	NA	NA	https://storage.googleapis.com/elegansvariation.org/photos/hawaii2017/C-0811.thumb.jpg
Not genotyped	Leaf litter	NA	NA	C-0819	NA	Tracks	NA	22.149067	-159.641372	Kauai	Wild forest	Partially Obstructed	yes	5	F	3	18.3	50	71.1	20.5	1248.137931	2017-08-08	10:10:00	NA	NA	https://storage.googleapis.com/elegansvariation.org/photos/hawaii2017/C-0819.thumb.jpg
Not genotyped	Leaf litter	NA	NA	C-0889	S-06514	Yes	Few (4-10)	21.138075	-156.965825	Molokai	Wild forest	Obstructed	yes	20	B	3	21.8	67	68.6	26	759.7380952	2017-08-12	12:24:00	NA	NA	https://storage.googleapis.com/elegansvariation.org/photos/hawaii2017/C-0889.thumb.jpg
Not genotyped	Leaf litter	NA	NA	C-0896	S-06665	Yes	Some (11-25)	20.79521364	-156.0758536	Maui	Wild forest	Partially Obstructed	yes	15	F	2	22.2	67.5	81.1	24.3	337	2017-08-15	15:37:00	NA	NA	https://storage.googleapis.com/elegansvariation.org/photos/hawaii2017/C-0896.thumb.jpg
Not genotyped	Leaf litter	NA	NA	C-0896	S-06666	Yes	Some (11-25)	20.79521364	-156.0758536	Maui	Wild forest	Partially Obstructed	yes	15	F	2	22.2	67.5	81.1	24.3	337	2017-08-15	15:37:00	NA	NA	https://storage.googleapis.com/elegansvariation.org/photos/hawaii2017/C-0896.thumb.jpg
Not genotyped	Leaf litter	NA	NA	C-0896	S-06667	Yes	Some (11-25)	20.79521364	-156.0758536	Maui	Wild forest	Partially Obstructed	yes	15	F	2	22.2	67.5	81.1	24.3	337	2017-08-15	15:37:00	NA	NA	https://storage.googleapis.com/elegansvariation.org/photos/hawaii2017/C-0896.thumb.jpg
Not genotyped	Leaf litter	NA	NA	C-0900	S-06564	Yes	Few (4-10)	20.79521364	-156.0758536	Maui	Wild forest	Partially Obstructed	yes	15	E	2	22.1	65.5	78.3	24.9	337	2017-08-15	15:35:00	NA	NA	https://storage.googleapis.com/elegansvariation.org/photos/hawaii2017/C-0900.thumb.jpg
Not genotyped	Leaf litter	NA	NA	C-0900	S-06671	Yes	Few (4-10)	20.79521364	-156.0758536	Maui	Wild forest	Partially Obstructed	yes	15	E	2	22.1	65.5	78.3	24.9	337	2017-08-15	15:35:00	NA	NA	https://storage.googleapis.com/elegansvariation.org/photos/hawaii2017/C-0900.thumb.jpg
Not genotyped	Leaf litter	NA	NA	C-0908	S-06656	Yes	Few (4-10)	20.874575	-156.186331	Maui	Wild forest	Partially Obstructed	yes	15	D	2	22.1	67.5	77.5	24.9	242	2017-08-15	15:32:00	NA	NA	https://storage.googleapis.com/elegansvariation.org/photos/hawaii2017/C-0908.thumb.jpg
Not genotyped	Leaf litter	NA	NA	C-0908	S-06657	Yes	Few (4-10)	20.874575	-156.186331	Maui	Wild forest	Partially Obstructed	yes	15	D	2	22.1	67.5	77.5	24.9	242	2017-08-15	15:32:00	NA	NA	https://storage.googleapis.com/elegansvariation.org/photos/hawaii2017/C-0908.thumb.jpg
Not genotyped	Leaf litter	NA	NA	C-0908	S-06658	Yes	Few (4-10)	20.874575	-156.186331	Maui	Wild forest	Partially Obstructed	yes	15	D	2	22.1	67.5	77.5	24.9	242	2017-08-15	15:32:00	NA	NA	https://storage.googleapis.com/elegansvariation.org/photos/hawaii2017/C-0908.thumb.jpg
Not genotyped	Leaf litter	NA	NA	C-0925	S-05734	Yes	Proliferating (25+)	22.19435	-159.478569	Kauai	Wild forest	Partially Obstructed	yes	11	C	2	22.8	58	72.1	25.666666666666668	200.1666165	2017-08-10	11:35:00	NA	NA	https://storage.googleapis.com/elegansvariation.org/photos/hawaii2017/C-0925.thumb.jpg
Not genotyped	Leaf litter	NA	NA	C-0925	S-05735	Yes	Proliferating (25+)	22.19435	-159.478569	Kauai	Wild forest	Partially Obstructed	yes	11	C	2	22.8	58	72.1	25.666666666666668	200.1666165	2017-08-10	11:35:00	NA	NA	https://storage.googleapis.com/elegansvariation.org/photos/hawaii2017/C-0925.thumb.jpg
Not genotyped	Leaf litter	NA	NA	C-0931	S-06767	Yes	Few (4-10)	20.874611	-156.18645	Maui	Wild forest	Partially Obstructed	yes	15	E	3	22.1	65	78.3	24.9	198.809417	2017-08-15	15:35:00	NA	NA	https://storage.googleapis.com/elegansvariation.org/photos/hawaii2017/C-0931.thumb.jpg
Not genotyped	Leaf litter	NA	NA	C-0931	S-06768	Yes	Few (4-10)	20.874611	-156.18645	Maui	Wild forest	Partially Obstructed	yes	15	E	3	22.1	65	78.3	24.9	198.809417	2017-08-15	15:35:00	NA	NA	https://storage.googleapis.com/elegansvariation.org/photos/hawaii2017/C-0931.thumb.jpg
Not genotyped	Leaf litter	NA	NA	C-0933	S-05729	Yes	Few (4-10)	22.194333	-159.478628	Kauai	Wild forest	Partially Obstructed	yes	11	E	2	23.6	53	77.1	25.666666666666668	200.1533333	2017-08-10	11:39:00	NA	NA	https://storage.googleapis.com/elegansvariation.org/photos/hawaii2017/C-0933.thumb.jpg
Not genotyped	Leaf litter	NA	NA	C-0937	S-05738	Yes	Proliferating (25+)	22.194325	-159.478633	Kauai	Wild forest	Partially Obstructed	yes	11	A	0	22.5	60.5	76.1	25.666666666666668	198.8688525	2017-08-10	11:40:00	NA	NA	https://storage.googleapis.com/elegansvariation.org/photos/hawaii2017/C-0937.thumb.jpg
Not genotyped	Leaf litter	NA	NA	C-0947	NA	Tracks	NA	20.874608	-156.186233	Maui	Wild forest	Partially Obstructed	yes	15	C	3	21.3	67	75.6	25.6	193.8323699	2017-08-15	15:30:00	NA	NA	https://storage.googleapis.com/elegansvariation.org/photos/hawaii2017/C-0947.thumb.jpg
Not genotyped	Leaf litter	NA	NA	C-0954	S-05705	Yes	Proliferating (25+)	22.194394	-159.478606	Kauai	Wild forest	Partially Obstructed	yes	11	D	2	23	62	76.1	25.666666666666668	198.6987179	2017-08-10	11:37:00	NA	NA	https://storage.googleapis.com/elegansvariation.org/photos/hawaii2017/C-0954.thumb.jpg
Not genotyped	Leaf litter	NA	NA	C-0959	S-06776	Yes	Few (4-10)	20.874981	-156.186153	Maui	Wild forest	Partially Obstructed	yes	15	A	3	22	46	73.1	25.6	195.9987484	2017-08-15	15:25:00	NA	NA	https://storage.googleapis.com/elegansvariation.org/photos/hawaii2017/C-0959.thumb.jpg
Not genotyped	Leaf litter	NA	NA	C-0959	S-06777	Yes	Few (4-10)	20.874981	-156.186153	Maui	Wild forest	Partially Obstructed	yes	15	A	3	22	46	73.1	25.6	195.9987484	2017-08-15	15:25:00	NA	NA	https://storage.googleapis.com/elegansvariation.org/photos/hawaii2017/C-0959.thumb.jpg
Not genotyped	Leaf litter	NA	NA	C-0959	S-06785	Yes	Few (4-10)	20.874981	-156.186153	Maui	Wild forest	Partially Obstructed	yes	15	A	3	22	46	73.1	25.6	195.9987484	2017-08-15	15:25:00	NA	NA	https://storage.googleapis.com/elegansvariation.org/photos/hawaii2017/C-0959.thumb.jpg
Not genotyped	Leaf litter	NA	NA	C-0986	S-05760	Yes	Proliferating (25+)	22.194386	-159.478586	Kauai	Wild forest	Partially Obstructed	yes	11	B	3	23.7	65.5	77.9	26	191.2009569	2017-08-10	11:33:00	NA	NA	https://storage.googleapis.com/elegansvariation.org/photos/hawaii2017/C-0986.thumb.jpg
Not genotyped	Leaf litter	NA	NA	C-0994	S-05751	Yes	Proliferating (25+)	22.194444	-159.478561	Kauai	Wild forest	Partially Obstructed	yes	11	D	3	21.7	63	76	26	188.0660066	2017-08-10	11:37:00	NA	NA	https://storage.googleapis.com/elegansvariation.org/photos/hawaii2017/C-0994.thumb.jpg
Not genotyped	Leaf litter	NA	NA	C-0995	S-05876	Yes	Very Few (1-3)	22.121906	-159.664358	Kauai	Wild forest	Partially Obstructed	yes	12	B	3	18.5	32.5	79.4	21.2	1116.236842	2017-08-11	14:04:00	NA	NA	https://storage.googleapis.com/elegansvariation.org/photos/hawaii2017/C-0995.thumb.jpg
Not genotyped	Leaf litter	NA	NA	C-1011	S-05929	Yes	Very Few (1-3)	22.121856	-159.664408	Kauai	Wild forest	Partially Obstructed	yes	12	E	1	18.8	45	82.3	20.1	1115.131455	2017-08-11	14:08:00	NA	NA	https://storage.googleapis.com/elegansvariation.org/photos/hawaii2017/C-1011.thumb.jpg
Not genotyped	Leaf litter	NA	NA	C-1065	S-05561	Yes	Very Few (1-3)	22.071328	-159.417467	Kauai	Wild forest	Partially Obstructed	yes	7	B	1	25.2	69	67.7	28.1	156.6606876	2017-08-09	10:50:00	NA	NA	https://storage.googleapis.com/elegansvariation.org/photos/hawaii2017/C-1065.thumb.jpg
Not genotyped	Leaf litter	NA	NA	C-1065	S-05563	Yes	Very Few (1-3)	22.071328	-159.417467	Kauai	Wild forest	Partially Obstructed	yes	7	B	1	25.2	69	67.7	28.1	156.6606876	2017-08-09	10:50:00	NA	NA	https://storage.googleapis.com/elegansvariation.org/photos/hawaii2017/C-1065.thumb.jpg
Not genotyped	Leaf litter	NA	NA	C-1066	S-05217	Yes	Some (11-25)	22.052375	-159.408808	Kauai	Wild forest	Partially Obstructed	yes	7	B	3	25.5	69.5	71.9	27.4	160.38316355	2017-08-09	10:48:00	NA	NA	https://storage.googleapis.com/elegansvariation.org/photos/hawaii2017/C-1066.thumb.jpg
Not genotyped	Leaf litter	NA	NA	C-1069	S-05212	Yes	Few (4-10)	22.071381	-159.417508	Kauai	Wild forest	Partially Obstructed	yes	7	A	3	24.9	70.5	71.1	27.4	155.2410714	2017-08-09	10:44:00	NA	NA	https://storage.googleapis.com/elegansvariation.org/photos/hawaii2017/C-1069.thumb.jpg
Not genotyped	Flower	NA	NA	C-1070	S-07516	Yes	Very Few (1-3)	22.071475	-159.417539	Kauai	Wild forest	Partially Obstructed	yes	7	A	0	23.7	69.5	67.2	28.1	157.6314496	2017-08-09	10:41:00	NA	NA	https://storage.googleapis.com/elegansvariation.org/photos/hawaii2017/C-1070.thumb.jpg
Not genotyped	Flower	NA	NA	C-1071	NA	Tracks	NA	22.071211	-159.417439	Kauai	Wild forest	Partially Obstructed	yes	7	B	2	25.6	31	70.6	28.1	158.400314	2017-08-09	10:49:00	NA	NA	https://storage.googleapis.com/elegansvariation.org/photos/hawaii2017/C-1071.thumb.jpg
Not genotyped	Leaf litter	NA	NA	C-1089	S-05713	Yes	Proliferating (25+)	22.194411	-159.478614	Kauai	Wild forest	Partially Obstructed	yes	11	F	3	23.3	62.5	75.5	26.7	193.4864865	2017-08-10	11:28:00	NA	NA	https://storage.googleapis.com/elegansvariation.org/photos/hawaii2017/C-1089.thumb.jpg
Not genotyped	Leaf litter	NA	NA	C-1119	NA	Tracks	NA	20.949847	-156.535508	Maui	Wild forest	Partially Obstructed	yes	13	E	1	22.3	62	88.8	23.6	413.0825688	2017-08-13	15:41:00	NA	NA	https://storage.googleapis.com/elegansvariation.org/photos/hawaii2017/C-1119.thumb.jpg
Not genotyped	Leaf litter	NA	NA	C-1120	NA	Tracks	NA	20.949489	-156.535217	Maui	Wild forest	Partially Obstructed	yes	13	F	1	22	67	91.2	22.9	413.1453488	2017-08-13	15:44:00	NA	NA	https://storage.googleapis.com/elegansvariation.org/photos/hawaii2017/C-1120.thumb.jpg
Not genotyped	Leaf litter	NA	NA	C-1125	S-05746	Yes	Few (4-10)	22.194414	-159.478564	Kauai	Wild forest	Partially Obstructed	yes	11	B	1	23.2	56	75.1	25.666666666666668	197.9204545	2017-08-10	11:33:00	NA	NA	https://storage.googleapis.com/elegansvariation.org/photos/hawaii2017/C-1125.thumb.jpg
Not genotyped	Leaf litter	NA	NA	C-1128	NA	Tracks	NA	20.949372	-156.535369	Maui	Wild forest	Partially Obstructed	yes	13	B	1	22.8	62	86.3	24.9	411.7684211	2017-08-13	15:35:00	NA	NA	https://storage.googleapis.com/elegansvariation.org/photos/hawaii2017/C-1128.thumb.jpg
Not genotyped	Leaf litter	NA	NA	C-1131	NA	Tracks	NA	20.949378	-156.535381	Maui	Wild forest	Partially Obstructed	yes	13	A	1	22.3	55	86.3	24.9	412.3536585	2017-08-13	15:32:00	NA	NA	https://storage.googleapis.com/elegansvariation.org/photos/hawaii2017/C-1131.thumb.jpg
Not genotyped	Leaf litter	NA	NA	C-1132	S-06509	Yes	Very Few (1-3)	20.925994	-156.511681	Maui	Wild forest	Partially Obstructed	yes	13	D	1	22.3	53	87.8	23.6	439	2017-08-13	15:39:00	NA	NA	https://storage.googleapis.com/elegansvariation.org/photos/hawaii2017/C-1132.thumb.jpg
Not genotyped	Leaf litter	NA	NA	C-1133	NA	Tracks	NA	20.949406	-156.535339	Maui	Wild forest	Partially Obstructed	yes	13	C	1	21.7	54.5	87.7	23.6	411.0719424	2017-08-13	15:37:00	NA	NA	https://storage.googleapis.com/elegansvariation.org/photos/hawaii2017/C-1133.thumb.jpg
Not genotyped	Leaf litter	NA	NA	C-1136	S-06532	Yes	Few (4-10)	20.949419	-156.53532	Maui	Wild forest	Partially Obstructed	yes	13	F	2	21.3	68.5	91.2	22.9	439	2017-08-13	15:43:00	NA	NA	https://storage.googleapis.com/elegansvariation.org/photos/hawaii2017/C-1136.thumb.jpg
Not genotyped	Leaf litter	NA	NA	C-1137	NA	Tracks	NA	20.949419	-156.535319	Maui	Wild forest	Partially Obstructed	yes	13	E	2	21.4	60.5	88.8	23.6	439	2017-08-13	15:41:00	NA	NA	https://storage.googleapis.com/elegansvariation.org/photos/hawaii2017/C-1137.thumb.jpg
Not genotyped	Leaf litter	NA	NA	C-1138	NA	Tracks	NA	20.949419	-156.535317	Maui	Wild forest	Partially Obstructed	yes	13	D	2	21	68.5	87.8	23.6	439	2017-08-13	15:39:00	NA	NA	https://storage.googleapis.com/elegansvariation.org/photos/hawaii2017/C-1138.thumb.jpg
Not genotyped	Leaf litter	NA	NA	C-1196	NA	Tracks	NA	20.767694	-156.237008	Maui	Wild forest	Partially Obstructed	yes	16	A	1	19.1	55	86.8	14.7	2073.286885	2017-08-16	15:49:00	NA	NA	https://storage.googleapis.com/elegansvariation.org/photos/hawaii2017/C-1196.thumb.jpg
Not genotyped	Leaf litter	NA	NA	C-1200	NA	Tracks	NA	20.767879	-156.237116	Maui	Wild forest	Partially Obstructed	yes	16	C	2	10.9	55.5	89.1	13.3	2075	2017-08-16	15:52:00	NA	NA	https://storage.googleapis.com/elegansvariation.org/photos/hawaii2017/C-1200.thumb.jpg
Not genotyped	Leaf litter	NA	NA	C-1215	NA	Tracks	NA	20.949424	-156.535322	Maui	Wild forest	Partially Obstructed	yes	13	A	2	21.7	66	86.3	24.9	439	2017-08-13	15:32:00	NA	NA	https://storage.googleapis.com/elegansvariation.org/photos/hawaii2017/C-1215.thumb.jpg
Not genotyped	Leaf litter	NA	NA	C-1219	NA	Tracks	NA	20.949423	-156.53532	Maui	Wild forest	Partially Obstructed	yes	13	B	2	21.6	63	86.8	23.6	439	2017-08-13	15:35:00	NA	NA	https://storage.googleapis.com/elegansvariation.org/photos/hawaii2017/C-1219.thumb.jpg
Not genotyped	Leaf litter	NA	NA	C-1265	NA	Tracks	NA	20.723317	-156.304353	Maui	Wild forest	Partially Obstructed	yes	14	A	0	17.1	65	62.4	23.4	1630.0875	2017-08-14	14:11:00	NA	NA	https://storage.googleapis.com/elegansvariation.org/photos/hawaii2017/C-1265.thumb.jpg
Not genotyped	Leaf litter	NA	NA	C-1266	S-06575	Yes	Very Few (1-3)	20.723386	-156.304344	Maui	Wild forest	Partially Obstructed	yes	14	A	1	16.1	66	76	19.9	1638.102273	2017-08-14	14:12:00	NA	NA	https://storage.googleapis.com/elegansvariation.org/photos/hawaii2017/C-1266.thumb.jpg
Not genotyped	Leaf litter	NA	NA	C-1267	S-06566	Yes	Very Few (1-3)	20.723413999999998	-156.304353	Maui	Wild forest	Partially Obstructed	yes	14	B	1	15.8	66.5	83.3	18.5	1636.191781	2017-08-14	14:15:00	NA	NA	https://storage.googleapis.com/elegansvariation.org/photos/hawaii2017/C-1267.thumb.jpg
Not genotyped	Leaf litter	NA	NA	C-1268	NA	Tracks	NA	20.723381	-156.304325	Maui	Wild forest	Partially Obstructed	yes	14	F	1	16	69	86.2	17.1	1633.967742	2017-08-14	14:23:00	NA	NA	https://storage.googleapis.com/elegansvariation.org/photos/hawaii2017/C-1268.thumb.jpg
Not genotyped	Leaf litter	NA	NA	C-1269	NA	Tracks	NA	20.723408	-156.304372	Maui	Wild forest	Partially Obstructed	yes	14	E	1	16.1	70.5	85.3	17.8	1637.833977	2017-08-14	14:20:00	NA	NA	https://storage.googleapis.com/elegansvariation.org/photos/hawaii2017/C-1269.thumb.jpg
Not genotyped	Leaf litter	NA	NA	C-1270	NA	Tracks	NA	20.723392	-156.304383	Maui	Wild forest	Partially Obstructed	yes	14	D	1	15.5	66.5	85.3	17.8	1638.093333	2017-08-14	14:19:00	NA	NA	https://storage.googleapis.com/elegansvariation.org/photos/hawaii2017/C-1270.thumb.jpg
Not genotyped	Leaf litter	NA	NA	C-1271	NA	Tracks	NA	20.723411	-156.304356	Maui	Wild forest	Partially Obstructed	yes	14	C	1	16	67.5	85.3	18.5	1639.163636	2017-08-14	14:18:00	NA	NA	https://storage.googleapis.com/elegansvariation.org/photos/hawaii2017/C-1271.thumb.jpg
Not genotyped	Leaf litter	NA	NA	C-1273	NA	Tracks	NA	20.723419	-156.304392	Maui	Wild forest	Partially Obstructed	yes	14	B	3	14.9	67	83.6	18.5	1634.373494	2017-08-14	14:16:00	NA	NA	https://storage.googleapis.com/elegansvariation.org/photos/hawaii2017/C-1273.thumb.jpg
Not genotyped	Leaf litter	NA	NA	C-1274	S-06651	Yes	Very Few (1-3)	20.723336	-156.304278	Maui	Wild forest	Partially Obstructed	yes	14	C	3	14.2	60.5	85.3	18.5	1639.859375	2017-08-14	14:18:00	NA	NA	https://storage.googleapis.com/elegansvariation.org/photos/hawaii2017/C-1274.thumb.jpg
Not genotyped	Leaf litter	NA	NA	C-1275	S-06608	Yes	Very Few (1-3)	20.723328	-156.304339	Maui	Wild forest	Partially Obstructed	yes	14	D	3	14	71	85.3	17.8	1633.105469	2017-08-14	14:19:00	NA	NA	https://storage.googleapis.com/elegansvariation.org/photos/hawaii2017/C-1275.thumb.jpg
Not genotyped	Leaf litter	NA	NA	C-1277	NA	Tracks	NA	20.723417	-156.304436	Maui	Wild forest	Partially Obstructed	yes	14	F	3	14.5	68	86.2	17.1	1651.985714	2017-08-14	14:23:00	NA	NA	https://storage.googleapis.com/elegansvariation.org/photos/hawaii2017/C-1277.thumb.jpg
Not genotyped	Leaf litter	NA	NA	C-1280	S-06645	Yes	Very Few (1-3)	20.723381	-156.304339	Maui	Wild forest	Partially Obstructed	yes	14	F	2	14.5	68.5	86.2	17.1	1653	2017-08-14	14:23:00	NA	NA	https://storage.googleapis.com/elegansvariation.org/photos/hawaii2017/C-1280.thumb.jpg
Not genotyped	Flower	NA	NA	C-1281	NA	Tracks	NA	20.723415	-156.304333	Maui	Wild forest	Partially Obstructed	yes	14	C	2	14.9	70.5	85.3	18.5	1653	2017-08-14	14:18:00	NA	NA	https://storage.googleapis.com/elegansvariation.org/photos/hawaii2017/C-1281.thumb.jpg
Not genotyped	Leaf litter	NA	NA	C-1282	NA	Tracks	NA	20.7234152	-156.3043329	Maui	Wild forest	Partially Obstructed	yes	14	D	2	14.7	71	85.3	17.8	1653	2017-08-14	14:19:00	NA	NA	https://storage.googleapis.com/elegansvariation.org/photos/hawaii2017/C-1282.thumb.jpg
Not genotyped	Leaf litter	NA	NA	C-1283	NA	Tracks	NA	20.723376	-156.304034	Maui	Wild forest	Partially Obstructed	yes	14	A	2	16.3	69.5	80.7	19.2	1653	2017-08-14	14:13:00	NA	NA	https://storage.googleapis.com/elegansvariation.org/photos/hawaii2017/C-1283.thumb.jpg
Not genotyped	Leaf litter	NA	NA	C-1284	NA	Tracks	NA	20.723416	-156.304322	Maui	Wild forest	Partially Obstructed	yes	14	B	2	15.3	67.5	83.6	18.5	1653	2017-08-14	14:16:00	NA	NA	https://storage.googleapis.com/elegansvariation.org/photos/hawaii2017/C-1284.thumb.jpg
Not genotyped	Leaf litter	NA	NA	C-1285	NA	Tracks	NA	20.723397	-156.304335	Maui	Wild forest	Partially Obstructed	yes	14	E	2	14.3	70	85.3	17.8	1653	2017-08-14	14:21:00	NA	NA	https://storage.googleapis.com/elegansvariation.org/photos/hawaii2017/C-1285.thumb.jpg
Not genotyped	Leaf litter	NA	NA	C-1307	S-06859	Yes	Very Few (1-3)	20.767852	-156.237113	Maui	Wild forest	Partially Obstructed	yes	16	F	2	11.3	66.5	95.8	13.3	2075	2017-08-16	15:58:00	NA	NA	https://storage.googleapis.com/elegansvariation.org/photos/hawaii2017/C-1307.thumb.jpg
Not genotyped	Leaf litter	NA	NA	C-1308	NA	Tracks	NA	20.767851000000743	-156.23709699999986	Maui	Wild forest	Partially Obstructed	yes	16	E	2	11	58.5	91.9	12.6	2075	2017-08-16	15:56:00	NA	NA	https://storage.googleapis.com/elegansvariation.org/photos/hawaii2017/C-1308.thumb.jpg
Not genotyped	Leaf litter	NA	NA	C-1314	S-06828	Yes	Very Few (1-3)	20.767742	-156.237011	Maui	Wild forest	Partially Obstructed	yes	16	A	3	11.3	54.5	86.8	14.7	2066.015625	2017-08-16	15:48:00	NA	NA	https://storage.googleapis.com/elegansvariation.org/photos/hawaii2017/C-1314.thumb.jpg
Not genotyped	Leaf litter	NA	NA	C-1317	NA	Tracks	NA	20.767742	-156.237011	Maui	Wild forest	Partially Obstructed	yes	16	B	3	10.2	62	83.4	14	2066.150442	2017-08-16	15:51:00	NA	NA	https://storage.googleapis.com/elegansvariation.org/photos/hawaii2017/C-1317.thumb.jpg
Not genotyped	Leaf litter	NA	NA	C-1318	S-06794	Yes	Very Few (1-3)	20.767728	-156.236978	Maui	Wild forest	Partially Obstructed	yes	16	C	3	10.8	59	89.1	13.3	2065.575758	2017-08-16	15:52:00	NA	NA	https://storage.googleapis.com/elegansvariation.org/photos/hawaii2017/C-1318.thumb.jpg
Not genotyped	Leaf litter	NA	NA	C-1323	NA	Tracks	NA	21.138183	-156.965847	Molokai	Wild forest	Partially Obstructed	yes	20	E	1	21.6	66	67.2	25.3	755.2842105	2017-08-12	12:30:00	NA	NA	https://storage.googleapis.com/elegansvariation.org/photos/hawaii2017/C-1323.thumb.jpg
Not genotyped	Leaf litter	NA	NA	C-1324	NA	Tracks	NA	20.767731	-156.237142	Maui	Wild forest	Partially Obstructed	yes	16	F	3	11.6	60.5	95.8	13.3	2074.289474	2017-08-16	15:58:00	NA	NA	https://storage.googleapis.com/elegansvariation.org/photos/hawaii2017/C-1324.thumb.jpg
Not genotyped	Leaf litter	NA	NA	C-1327	S-06496	Yes	Few (4-10)	21.138097	-156.965931	Molokai	Wild forest	Partially Obstructed	yes	20	F	1	21.5	68.5	71.6	24.7	743.4295302	2017-08-12	12:32:00	NA	NA	https://storage.googleapis.com/elegansvariation.org/photos/hawaii2017/C-1327.thumb.jpg
Not genotyped	Leaf litter	NA	NA	C-1327	S-06497	Yes	Few (4-10)	21.138097	-156.965931	Molokai	Wild forest	Partially Obstructed	yes	20	F	1	21.5	68.5	71.6	24.7	743.4295302	2017-08-12	12:32:00	NA	NA	https://storage.googleapis.com/elegansvariation.org/photos/hawaii2017/C-1327.thumb.jpg
Not genotyped	Leaf litter	NA	NA	C-1332	S-06800	Yes	Very Few (1-3)	20.7677	-156.237044	Maui	Wild forest	Partially Obstructed	yes	16	C	1	12.4	59	89.1	13.3	2065.65	2017-08-16	15:52:00	NA	NA	https://storage.googleapis.com/elegansvariation.org/photos/hawaii2017/C-1332.thumb.jpg
Not genotyped	Leaf litter	NA	NA	C-1332	S-06802	Yes	Very Few (1-3)	20.7677	-156.237044	Maui	Wild forest	Partially Obstructed	yes	16	C	1	12.4	59	89.1	13.3	2065.65	2017-08-16	15:52:00	NA	NA	https://storage.googleapis.com/elegansvariation.org/photos/hawaii2017/C-1332.thumb.jpg
Not genotyped	Leaf litter	NA	NA	C-1336	S-06795	Yes	Few (4-10)	20.76785	-156.237081	Maui	Wild forest	Partially Obstructed	yes	16	E	1	12.3	55.5	91.9	12.6	2062.245283	2017-08-16	15:56:00	NA	NA	https://storage.googleapis.com/elegansvariation.org/photos/hawaii2017/C-1336.thumb.jpg
Not genotyped	Leaf litter	NA	NA	C-1338	NA	Tracks	NA	21.138068	-156.965936	Molokai	Wild forest	Partially Obstructed	yes	20	B	2	21.9	61	68.6	26	766	2017-08-12	12:24:00	NA	NA	https://storage.googleapis.com/elegansvariation.org/photos/hawaii2017/C-1338.thumb.jpg
Not genotyped	Leaf litter	NA	NA	C-1340	S-06790	Yes	Very Few (1-3)	20.767747	-156.237028	Maui	Wild forest	Partially Obstructed	yes	16	D	1	12.4	58	89.7	13.3	2064.590164	2017-08-16	15:54:00	NA	NA	https://storage.googleapis.com/elegansvariation.org/photos/hawaii2017/C-1340.thumb.jpg
Not genotyped	Leaf litter	NA	NA	C-1344	S-06826	Yes	Few (4-10)	20.767822	-156.237133	Maui	Wild forest	Partially Obstructed	yes	16	F	1	12.3	54	95.8	13.3	2066.253521	2017-08-16	15:58:00	NA	NA	https://storage.googleapis.com/elegansvariation.org/photos/hawaii2017/C-1344.thumb.jpg
Not genotyped	Leaf litter	NA	NA	C-1344	S-06827	Yes	Few (4-10)	20.767822	-156.237133	Maui	Wild forest	Partially Obstructed	yes	16	F	1	12.3	54	95.8	13.3	2066.253521	2017-08-16	15:58:00	NA	NA	https://storage.googleapis.com/elegansvariation.org/photos/hawaii2017/C-1344.thumb.jpg
Not genotyped	Leaf litter	NA	NA	C-1346	NA	Tracks	NA	21.138029	-156.965924	Molokai	Wild forest	Partially Obstructed	yes	20	C	2	22.5	63	73.5	25.3	766	2017-08-12	12:26:00	NA	NA	https://storage.googleapis.com/elegansvariation.org/photos/hawaii2017/C-1346.thumb.jpg
Not genotyped	Leaf litter	NA	NA	C-1358	NA	Tracks	NA	21.138031	-156.965898	Molokai	Wild forest	Partially Obstructed	yes	20	D	2	23.5	66	72	25.3	766	2017-08-12	12:28:00	NA	NA	https://storage.googleapis.com/elegansvariation.org/photos/hawaii2017/C-1358.thumb.jpg
Not genotyped	Leaf litter	NA	NA	C-1362	S-06458	Yes	Very Few (1-3)	21.138045	-156.965889	Molokai	Wild forest	Partially Obstructed	yes	20	E	2	22	60.5	67.2	25.3	766	2017-08-12	12:30:00	NA	NA	https://storage.googleapis.com/elegansvariation.org/photos/hawaii2017/C-1362.thumb.jpg
Not genotyped	Leaf litter	NA	NA	C-1470	S-06750	Yes	Very Few (1-3)	20.767916	-156.237166	Maui	Wild forest	Partially Obstructed	yes	16	A	0	13.1	58.5	71.5	18.1	2075	2017-08-16	15:45:00	NA	NA	https://storage.googleapis.com/elegansvariation.org/photos/hawaii2017/C-1470.thumb.jpg
Not genotyped	Leaf litter	NA	NA	C-1472	S-06801	Yes	Very Few (1-3)	20.767871	-156.237109	Maui	Wild forest	Partially Obstructed	yes	16	D	2	11	34	89.7	13.3	2075	2017-08-16	15:54:00	NA	NA	https://storage.googleapis.com/elegansvariation.org/photos/hawaii2017/C-1472.thumb.jpg
Not genotyped	Leaf litter	NA	NA	C-1516	NA	Tracks	NA	20.664891	-156.049029	Maui	Wild forest	Partially Obstructed	yes	17	D	2	24.2	63	73	26.7	114	2017-08-17	15:45:00	NA	NA	https://storage.googleapis.com/elegansvariation.org/photos/hawaii2017/C-1516.thumb.jpg
Not genotyped	Fruit	NA	NA	C-1517	S-06871	Yes	Few (4-10)	20.664919	-156.049025	Maui	Wild forest	Partially Obstructed	yes	17	B	2	23.7	51	70.5	26.7	114	2017-08-17	15:40:00	NA	NA	https://storage.googleapis.com/elegansvariation.org/photos/hawaii2017/C-1517.thumb.jpg
Not genotyped	Fruit	NA	NA	C-1523	S-06968	Yes	Some (11-25)	20.66489	-156.04903	Maui	Wild forest	Partially Obstructed	yes	17	E	2	24.4	68	72.6	26.4	114	2017-08-17	15:47:00	NA	NA	https://storage.googleapis.com/elegansvariation.org/photos/hawaii2017/C-1523.thumb.jpg
Not genotyped	Leaf litter	NA	NA	C-2535	S-06738	Yes	Very Few (1-3)	20.874497	-156.186286	Maui	Wild forest	Partially Obstructed	yes	15	C	1	22.8	64	75.6	25.6	197.5632184	2017-08-15	15:30:00	NA	NA	https://storage.googleapis.com/elegansvariation.org/photos/hawaii2017/C-2535.thumb.jpg
Not genotyped	Leaf litter	NA	NA	C-2543	NA	Tracks	NA	20.87449836	-156.1862851	Maui	Wild forest	Partially Obstructed	yes	15	D	1	23.4	67	77.5	24.9	197.5632184	2017-08-15	15:32:00	NA	NA	https://storage.googleapis.com/elegansvariation.org/photos/hawaii2017/C-2543.thumb.jpg
Not genotyped	Leaf litter	NA	NA	C-2547	S-06737	Yes	Few (4-10)	20.886717	-156.299233	Maui	Wild forest	Partially Obstructed	yes	15	E	1	22.8	65	78.3	24.9	197.5632184	2017-08-15	15:35:00	NA	NA	https://storage.googleapis.com/elegansvariation.org/photos/hawaii2017/C-2547.thumb.jpg
Not genotyped	Fruit	NA	NA	C-2592	S-06788	Yes	Few (4-10)	20.664889	-156.049019	Maui	Wild forest	Partially Obstructed	yes	17	C	3	24.5	67	70.1	26.7	93.33309353	2017-08-17	15:41:00	NA	NA	https://storage.googleapis.com/elegansvariation.org/photos/hawaii2017/C-2592.thumb.jpg
Not genotyped	Fruit	NA	NA	C-2592	S-06845	Yes	Few (4-10)	20.664889	-156.049019	Maui	Wild forest	Partially Obstructed	yes	17	C	3	24.5	67	70.1	26.7	93.33309353	2017-08-17	15:41:00	NA	NA	https://storage.googleapis.com/elegansvariation.org/photos/hawaii2017/C-2592.thumb.jpg
Not genotyped	Fruit	NA	NA	C-2593	S-06942	Yes	Proliferating (25+)	20.664903	-156.049008	Maui	Wild forest	Partially Obstructed	yes	17	D	3	24.4	67.5	73	26.7	100.0090498	2017-08-17	15:45:00	NA	NA	https://storage.googleapis.com/elegansvariation.org/photos/hawaii2017/C-2593.thumb.jpg
Not genotyped	Fruit	NA	NA	C-2593	S-06943	Yes	Proliferating (25+)	20.664903	-156.049008	Maui	Wild forest	Partially Obstructed	yes	17	D	3	24.4	67.5	73	26.7	100.0090498	2017-08-17	15:45:00	NA	NA	https://storage.googleapis.com/elegansvariation.org/photos/hawaii2017/C-2593.thumb.jpg
Not genotyped	Fruit	NA	NA	C-2593	S-06944	Yes	Proliferating (25+)	20.664903	-156.049008	Maui	Wild forest	Partially Obstructed	yes	17	D	3	24.4	67.5	73	26.7	100.0090498	2017-08-17	15:45:00	NA	NA	https://storage.googleapis.com/elegansvariation.org/photos/hawaii2017/C-2593.thumb.jpg
Not genotyped	Leaf litter	NA	NA	C-2595	NA	Tracks	NA	20.66489	-156.04903	Maui	Wild forest	Partially Obstructed	yes	17	F	2	24	59	74	26.7	114	2017-08-17	15:49:00	NA	NA	https://storage.googleapis.com/elegansvariation.org/photos/hawaii2017/C-2595.thumb.jpg
Not genotyped	Leaf litter	NA	NA	C-2600	NA	Tracks	NA	20.664811	-156.049031	Maui	Wild forest	Partially Obstructed	yes	17	D	1	24.7	32	73	26.7	106.0798611	2017-08-17	15:45:00	NA	NA	https://storage.googleapis.com/elegansvariation.org/photos/hawaii2017/C-2600.thumb.jpg
Not genotyped	Leaf litter	NA	NA	C-2650	NA	Tracks	NA	22.121997	-159.6645	Kauai	Wild forest	Partially Obstructed	yes	12	A	1	18.4	53	79.3	21.2	1127.910256	2017-08-11	14:02:00	NA	NA	https://storage.googleapis.com/elegansvariation.org/photos/hawaii2017/C-2650.thumb.jpg
Not genotyped	Leaf litter	NA	NA	C-2651	NA	Tracks	NA	22.121972	-159.664528	Kauai	Wild forest	Partially Obstructed	yes	12	A	2	18.2	54	81.7	21.2	1127.939759	2017-08-11	14:03:00	NA	NA	https://storage.googleapis.com/elegansvariation.org/photos/hawaii2017/C-2651.thumb.jpg
Not genotyped	Leaf litter	NA	NA	C-2652	X-005	Yes	Very Few (1-3)	22.122028	-159.664442	Kauai	Wild forest	Partially Obstructed	yes	12	B	1	17.6	43	81.5	20.5	1127.636905	2017-08-11	14:04:00	NA	NA	https://storage.googleapis.com/elegansvariation.org/photos/hawaii2017/C-2652.thumb.jpg
Not genotyped	Leaf litter	NA	NA	C-2658	S-05880	Yes	Very Few (1-3)	22.121878	-159.664503	Kauai	Wild forest	Partially Obstructed	yes	12	E	2	17.1	64	78.4	21.2	1127.708333	2017-08-11	14:08:00	NA	NA	https://storage.googleapis.com/elegansvariation.org/photos/hawaii2017/C-2658.thumb.jpg
Not genotyped	Leaf litter	NA	NA	C-2659	X-015	Yes	Very Few (1-3)	22.121897	-159.664453	Kauai	Wild forest	Partially Obstructed	yes	12	F	1	17.1	60.5	78.9	21.2	1127.708333	2017-08-11	14:09:00	NA	NA	https://storage.googleapis.com/elegansvariation.org/photos/hawaii2017/C-2659.thumb.jpg
Not genotyped	Leaf litter	NA	NA	C-2660	X-033	Yes	Very Few (1-3)	22.121864	-159.664458	Kauai	Wild forest	Partially Obstructed	yes	12	F	2	17.1	64	80.4	20.5	1127.708333	2017-08-11	14:10:00	NA	NA	https://storage.googleapis.com/elegansvariation.org/photos/hawaii2017/C-2660.thumb.jpg
Not genotyped	Leaf litter	NA	NA	C-2781	NA	Tracks	NA	20.036889	-155.441728	Big Island	Wild forest	Partially Obstructed	yes	2	C	2	20.5	62.5	80.9	21.9	691.199005	2017-08-17	14:10:00	NA	NA	https://storage.googleapis.com/elegansvariation.org/photos/hawaii2017/C-2781.thumb.jpg
Not genotyped	Leaf litter	NA	NA	C-2782	S-07459	Yes	Very Few (1-3)	20.036925	-155.441711	Big Island	Wild forest	Partially Obstructed	yes	2	B	1	21	62	77.4	22.6	691.1609195	2017-08-17	14:08:00	NA	NA	https://storage.googleapis.com/elegansvariation.org/photos/hawaii2017/C-2782.thumb.jpg
Not genotyped	Leaf litter	NA	NA	C-2783	S-07581	Yes	Very Few (1-3)	20.036894	-155.441717	Big Island	Wild forest	Partially Obstructed	yes	2	B	2	21	68.5	79.9	22.6	691.2393162	2017-08-17	14:09:00	NA	NA	https://storage.googleapis.com/elegansvariation.org/photos/hawaii2017/C-2783.thumb.jpg
Not genotyped	Leaf litter	NA	NA	C-2784	NA	Tracks	NA	20.03685	-155.441828	Big Island	Wild forest	Partially Obstructed	yes	2	A	3	20.6	62	77.9	22.6	691.9940828	2017-08-17	14:07:00	NA	NA	https://storage.googleapis.com/elegansvariation.org/photos/hawaii2017/C-2784.thumb.jpg
Not genotyped	Leaf litter	NA	NA	C-2813	NA	Tracks	NA	19.423789	-155.22245	Big Island	Rural garden	Partially Obstructed	yes	1	B	3	17.2	78	94	18.5	1117.311688	2017-08-14	07:59:00	NA	NA	https://storage.googleapis.com/elegansvariation.org/photos/hawaii2017/C-2813.thumb.jpg
Not genotyped	Leaf litter	NA	NA	C-2817	NA	Tracks	NA	19.4239	-155.222383	Big Island	Rural garden	Partially Obstructed	yes	1	D	3	17	68.5	94	18.5	1118.594203	2017-08-14	08:03:00	NA	NA	https://storage.googleapis.com/elegansvariation.org/photos/hawaii2017/C-2817.thumb.jpg
Not genotyped	Fruit	NA	NA	C-2824	S-07418	Yes	Few (4-10)	20.039858	-155.441608	Big Island	Wild forest	Partially Obstructed	yes	3	E	2	20.6	NA	83.1	22.6	670.8930041	2017-08-17	14:56:00	NA	NA	https://storage.googleapis.com/elegansvariation.org/photos/hawaii2017/C-2824.thumb.jpg
Not genotyped	Leaf litter	NA	NA	C-2828	S-07374	Yes	Some (11-25)	20.039869	-155.441619	Big Island	Wild forest	Partially Obstructed	yes	3	F	3	21.2	67.5	84.2	22.6	670.8197674	2017-08-17	14:57:00	NA	NA	https://storage.googleapis.com/elegansvariation.org/photos/hawaii2017/C-2828.thumb.jpg
Not genotyped	Leaf litter	NA	NA	C-2832	S-07381	Yes	Some (11-25)	20.039844	-155.441644	Big Island	Wild forest	Partially Obstructed	yes	3	F	2	20.5	69	80.8	22.6	671.333887	2017-08-17	14:58:00	NA	NA	https://storage.googleapis.com/elegansvariation.org/photos/hawaii2017/C-2832.thumb.jpg
Not genotyped	Leaf litter	NA	NA	C-2832	S-07396	Yes	Some (11-25)	20.039844	-155.441644	Big Island	Wild forest	Partially Obstructed	yes	3	F	2	20.5	69	80.8	22.6	671.333887	2017-08-17	14:58:00	NA	NA	https://storage.googleapis.com/elegansvariation.org/photos/hawaii2017/C-2832.thumb.jpg
Not genotyped	Leaf litter	NA	NA	C-2844	S-07426	Yes	Few (4-10)	20.039903	-155.441597	Big Island	Wild forest	Partially Obstructed	yes	3	C	2	20.9	69	85.2	22.6	670.3394495	2017-08-17	14:54:00	NA	NA	https://storage.googleapis.com/elegansvariation.org/photos/hawaii2017/C-2844.thumb.jpg
Not genotyped	Leaf litter	NA	NA	C-2844	S-07428	Yes	Few (4-10)	20.039903	-155.441597	Big Island	Wild forest	Partially Obstructed	yes	3	C	2	20.9	69	85.2	22.6	670.3394495	2017-08-17	14:54:00	NA	NA	https://storage.googleapis.com/elegansvariation.org/photos/hawaii2017/C-2844.thumb.jpg
Not genotyped	Leaf litter	NA	NA	C-2856	S-07363	Yes	Some (11-25)	20.039914	-155.441556	Big Island	Wild forest	Partially Obstructed	yes	3	A	2	21.9	69	87.6	21.9	669.971831	2017-08-17	14:51:00	NA	NA	https://storage.googleapis.com/elegansvariation.org/photos/hawaii2017/C-2856.thumb.jpg
Not genotyped	Leaf litter	NA	NA	C-2856	S-07364	Yes	Some (11-25)	20.039914	-155.441556	Big Island	Wild forest	Partially Obstructed	yes	3	A	2	21.9	69	87.6	21.9	669.971831	2017-08-17	14:51:00	NA	NA	https://storage.googleapis.com/elegansvariation.org/photos/hawaii2017/C-2856.thumb.jpg
Not genotyped	Leaf litter	NA	NA	C-2868	NA	Tracks	NA	19.423889	-155.222447	Big Island	Rural garden	Partially Obstructed	yes	1	F	2	15	71.5	94	18.5	1118.400369	2017-08-14	08:08:00	NA	NA	https://storage.googleapis.com/elegansvariation.org/photos/hawaii2017/C-2868.thumb.jpg
Not genotyped	Leaf litter	NA	NA	C-2875	S-07298	Yes	Few (4-10)	20.039903	-155.441594	Big Island	Wild forest	Partially Obstructed	yes	3	D	1	21.1	69	83.8	22.6	670.1843318	2017-08-17	14:54:00	NA	NA	https://storage.googleapis.com/elegansvariation.org/photos/hawaii2017/C-2875.thumb.jpg
Not genotyped	Leaf litter	NA	NA	C-2875	S-07303	Yes	Few (4-10)	20.039903	-155.441594	Big Island	Wild forest	Partially Obstructed	yes	3	D	1	21.1	69	83.8	22.6	670.1843318	2017-08-17	14:54:00	NA	NA	https://storage.googleapis.com/elegansvariation.org/photos/hawaii2017/C-2875.thumb.jpg
Not genotyped	Leaf litter	NA	NA	C-2879	S-07390	Yes	Few (4-10)	20.039864	-155.441644	Big Island	Wild forest	Partially Obstructed	yes	3	E	3	20.5	67	84.2	22.6	671.08125	2017-08-17	14:55:00	NA	NA	https://storage.googleapis.com/elegansvariation.org/photos/hawaii2017/C-2879.thumb.jpg
Not genotyped	Leaf litter	NA	NA	C-2961	NA	Tracks	NA	19.423858	-155.222486	Big Island	Rural garden	Partially Obstructed	yes	1	D	1	14.6	71.5	94	18.5	1120.500342	2017-08-14	08:03:00	NA	NA	https://storage.googleapis.com/elegansvariation.org/photos/hawaii2017/C-2961.thumb.jpg
Not genotyped	Leaf litter	NA	NA	C-2966	NA	Tracks	NA	19.423908	-155.222497	Big Island	Rural garden	Partially Obstructed	yes	1	E	2	14.9	71.5	94	18.5	1120.171429	2017-08-14	08:05:00	NA	NA	https://storage.googleapis.com/elegansvariation.org/photos/hawaii2017/C-2966.thumb.jpg
Not genotyped	Leaf litter	NA	NA	C-2967	NA	Tracks	NA	19.4239	-155.222456	Big Island	Rural garden	Partially Obstructed	yes	1	E	1	15.2	71.5	94	18.5	1118.995935	2017-08-14	08:05:00	NA	NA	https://storage.googleapis.com/elegansvariation.org/photos/hawaii2017/C-2967.thumb.jpg
Not genotyped	Leaf litter	NA	NA	C-3054	NA	Tracks	NA	19.423831	-155.222364	Big Island	Rural garden	Partially Obstructed	yes	1	B	2	15.2	71.5	94	18.5	1118.136201	2017-08-14	07:59:00	NA	NA	https://storage.googleapis.com/elegansvariation.org/photos/hawaii2017/C-3054.thumb.jpg
Not genotyped	Leaf litter	NA	NA	C-3059	NA	Tracks	NA	19.423833	-155.222475	Big Island	Rural garden	Partially Obstructed	yes	1	C	2	15	71.5	94	18.5	1120.646552	2017-08-14	08:01:00	NA	NA	https://storage.googleapis.com/elegansvariation.org/photos/hawaii2017/C-3059.thumb.jpg
Not genotyped	Leaf litter	NA	NA	C-3101	NA	Tracks	NA	19.423869	-155.222458	Big Island	Agricultural land	Partially Obstructed	yes	1	A	0	17.6	71.5	94	26.944444444444446	1118.421488	2017-08-14	07:53:00	NA	NA	https://storage.googleapis.com/elegansvariation.org/photos/hawaii2017/C-3101.thumb.jpg
Not genotyped	Leaf litter	NA	NA	C-3105	NA	Tracks	NA	19.423853	-155.222481	Big Island	Rural garden	Partially Obstructed	yes	1	A	2	15.7	71.5	94	18.5	1119.423358	2017-08-14	07:58:00	NA	NA	https://storage.googleapis.com/elegansvariation.org/photos/hawaii2017/C-3105.thumb.jpg
Not genotyped	Leaf litter	NA	NA	C-3122	S-07224	Yes	Few (4-10)	20.038614	-155.439544	Big Island	Wild forest	Partially Obstructed	yes	3	A	3	22.5	69	87.1	21.9	660.1563981	2017-08-17	14:50:00	NA	NA	https://storage.googleapis.com/elegansvariation.org/photos/hawaii2017/C-3122.thumb.jpg
Not genotyped	Fruit	NA	NA	C-3139	NA	Tracks	NA	20.039906	-155.441503	Big Island	Wild forest	Partially Obstructed	yes	3	B	1	19.9	NA	83.8	22.6	653.6134969	2017-08-17	14:51:00	NA	NA	https://storage.googleapis.com/elegansvariation.org/photos/hawaii2017/C-3139.thumb.jpg
Not genotyped	Leaf litter	NA	NA	C-3143	S-07639	Yes	Some (11-25)	20.039917	-155.441542	Big Island	Wild forest	Partially Obstructed	yes	3	D	2	19.8	68.5	80.9	22.6	655.4961832	2017-08-17	14:55:00	NA	NA	https://storage.googleapis.com/elegansvariation.org/photos/hawaii2017/C-3143.thumb.jpg
Not genotyped	Leaf litter	NA	NA	C-3147	S-07263	Yes	Few (4-10)	20.039908	-155.441533	Big Island	Wild forest	Partially Obstructed	yes	3	D	3	18.5	69	79.9	23.3	654.7903226	2017-08-17	14:56:00	NA	NA	https://storage.googleapis.com/elegansvariation.org/photos/hawaii2017/C-3147.thumb.jpg
Not genotyped	Leaf litter	NA	NA	C-3147	S-07318	Yes	Few (4-10)	20.039908	-155.441533	Big Island	Wild forest	Partially Obstructed	yes	3	D	3	18.5	69	79.9	23.3	654.7903226	2017-08-17	14:56:00	NA	NA	https://storage.googleapis.com/elegansvariation.org/photos/hawaii2017/C-3147.thumb.jpg
Not genotyped	Fruit	NA	NA	C-3155	S-07386	Yes	Some (11-25)	20.039908	-155.441503	Big Island	Wild forest	Partially Obstructed	yes	3	B	2	21.5	NA	NA	NA	655.4036697	2017-08-17	14:53:00	NA	NA	https://storage.googleapis.com/elegansvariation.org/photos/hawaii2017/C-3155.thumb.jpg
Not genotyped	Leaf litter	NA	NA	C-3193	S-07337	Yes	Few (4-10)	20.039886	-155.441525	Big Island	Wild forest	Partially Obstructed	yes	3	E	1	19.5	64.5	76.6	24	651.7148289	2017-08-17	14:56:00	NA	NA	https://storage.googleapis.com/elegansvariation.org/photos/hawaii2017/C-3193.thumb.jpg
Not genotyped	Fruit	NA	NA	C-3197	S-07252	Yes	Some (11-25)	20.039886	-155.441531	Big Island	Wild forest	Partially Obstructed	yes	3	F	1	19.4	NA	76.5	23.3	651.980315	2017-08-17	14:57:00	NA	NA	https://storage.googleapis.com/elegansvariation.org/photos/hawaii2017/C-3197.thumb.jpg
Not genotyped	Leaf litter	NA	NA	C-3304	S-07678	Yes	Few (4-10)	20.036883	-155.441736	Big Island	Wild forest	Partially Obstructed	yes	2	E	3	20.3	59	75.5	23.3	674.5319149	2017-08-17	14:11:00	NA	NA	https://storage.googleapis.com/elegansvariation.org/photos/hawaii2017/C-3304.thumb.jpg
Not genotyped	Leaf litter	NA	NA	C-3316	NA	Tracks	NA	20.036897	-155.441756	Big Island	Wild forest	Partially Obstructed	yes	2	C	3	20.3	55	76.2	23.3	675.8018018	2017-08-17	14:09:00	NA	NA	https://storage.googleapis.com/elegansvariation.org/photos/hawaii2017/C-3316.thumb.jpg
Not genotyped	Leaf litter	NA	NA	C-3340	S-07259	Yes	Very Few (1-3)	20.036878	-155.441781	Big Island	Wild forest	Partially Obstructed	yes	2	B	3	20.7	62	78.9	23.3	679.6333333	2017-08-17	14:08:00	NA	NA	https://storage.googleapis.com/elegansvariation.org/photos/hawaii2017/C-3340.thumb.jpg
Not genotyped	Leaf litter	NA	NA	C-3355	NA	Tracks	NA	20.036864	-155.441744	Big Island	Wild forest	Partially Obstructed	yes	2	F	2	20.3	61.5	74.5	23.3	677.2181818	2017-08-17	14:12:00	NA	NA	https://storage.googleapis.com/elegansvariation.org/photos/hawaii2017/C-3355.thumb.jpg
Not genotyped	Leaf litter	NA	NA	C-3359	NA	Tracks	NA	20.036861	-155.44175	Big Island	Wild forest	Partially Obstructed	yes	2	F	3	20.4	64.5	74.9	23.3	676.5461538	2017-08-17	14:12:00	NA	NA	https://storage.googleapis.com/elegansvariation.org/photos/hawaii2017/C-3359.thumb.jpg
No Worm	Leaf litter	NA	NA	C-0126	NA	No	NA	22.121964	-159.664444	Kauai	Wild forest	Partially Obstructed	yes	4	B	3	15.7	36	71.7	19.5	1117.888889	2017-08-07	08:17:00	NA	NA	https://storage.googleapis.com/elegansvariation.org/photos/hawaii2017/C-0126.thumb.jpg
No Worm	Leaf litter	NA	NA	C-0127	NA	No	NA	22.121817	-159.664386	Kauai	Wild forest	Partially Obstructed	yes	4	C	2	16.3	41.5	74.5	18.8	1088.623529	2017-08-07	08:20:00	NA	NA	https://storage.googleapis.com/elegansvariation.org/photos/hawaii2017/C-0127.thumb.jpg
No Worm	Leaf litter	NA	NA	C-0128	NA	No	NA	22.121947	-159.664467	Kauai	Wild forest	Partially Obstructed	yes	4	A	2	15	34	71.2	19.2	1112.384236	2017-08-07	08:13:00	NA	NA	https://storage.googleapis.com/elegansvariation.org/photos/hawaii2017/C-0128.thumb.jpg
No Worm	Leaf litter	NA	NA	C-0150	NA	No	NA	22.121875	-159.664386	Kauai	Wild forest	Partially Obstructed	yes	4	C	3	16.7	35.5	72.8	18.8	1125.473684	2017-08-07	08:19:00	NA	NA	https://storage.googleapis.com/elegansvariation.org/photos/hawaii2017/C-0150.thumb.jpg
No Worm	Leaf litter	NA	NA	C-0294	NA	No	NA	22.081625	-159.426028	Kauai	Wild forest	Partially Obstructed	yes	8	C	2	22.7	66.5	76.1	25.6	276.1538462	2017-08-09	11:33:00	NA	NA	https://storage.googleapis.com/elegansvariation.org/photos/hawaii2017/C-0294.thumb.jpg
No Worm	Leaf litter	NA	NA	C-0299	NA	No	NA	22.08165	-159.425992	Kauai	Wild forest	Partially Obstructed	yes	8	D	2	22.6	64	77.7	24.9	278.7483444	2017-08-09	11:31:00	NA	NA	https://storage.googleapis.com/elegansvariation.org/photos/hawaii2017/C-0299.thumb.jpg
No Worm	Leaf litter	NA	NA	C-0311	NA	No	NA	20.949369	-156.535222	Maui	Wild forest	Partially Obstructed	yes	13	A	0	22.6	54	86.8	24.9	429.5547445	2017-08-13	15:30:00	NA	NA	https://storage.googleapis.com/elegansvariation.org/photos/hawaii2017/C-0311.thumb.jpg
No Worm	Fungus	NA	NA	C-0315	NA	No	NA	20.949458	-156.53525	Maui	Wild forest	Partially Obstructed	yes	13	A	3	21.7	66	86	24.9	415.4926471	2017-08-13	15:32:00	NA	NA	https://storage.googleapis.com/elegansvariation.org/photos/hawaii2017/C-0315.thumb.jpg
No Worm	Leaf litter	NA	NA	C-0319	NA	No	NA	20.949322	-156.535258	Maui	Wild forest	Partially Obstructed	yes	13	B	3	21.2	58	86.8	23.6	415.5856574	2017-08-13	15:35:00	NA	NA	https://storage.googleapis.com/elegansvariation.org/photos/hawaii2017/C-0319.thumb.jpg
No Worm	Leaf litter	NA	NA	C-0323	NA	No	NA	20.949264	-156.535181	Maui	Wild forest	Partially Obstructed	yes	13	C	3	20.4	69	87.7	23.6	424.9629156	2017-08-13	15:37:00	NA	NA	https://storage.googleapis.com/elegansvariation.org/photos/hawaii2017/C-0323.thumb.jpg
No Worm	Leaf litter	NA	NA	C-0335	NA	No	NA	20.949575	-156.535347	Maui	Wild forest	Partially Obstructed	yes	13	F	3	21.3	66.5	91.2	22.9	414.9626168	2017-08-13	15:43:00	NA	NA	https://storage.googleapis.com/elegansvariation.org/photos/hawaii2017/C-0335.thumb.jpg
No Worm	Leaf litter	NA	NA	C-0363	NA	No	NA	22.131558	-159.660433	Kauai	Wild forest	Partially Obstructed	yes	10	D	3	19.2	37	63.1	23.3	1157.66129	2017-08-10	11:22:00	NA	NA	https://storage.googleapis.com/elegansvariation.org/photos/hawaii2017/C-0363.thumb.jpg
No Worm	Leaf litter	NA	NA	C-0367	NA	No	NA	22.131542	-159.660478	Kauai	Wild forest	Partially Obstructed	yes	10	E	3	19.5	44.5	60.5	23.3	1164.804878	2017-08-10	11:26:00	NA	NA	https://storage.googleapis.com/elegansvariation.org/photos/hawaii2017/C-0367.thumb.jpg
No Worm	Leaf litter	NA	NA	C-0371	NA	No	NA	22.131447	-159.660511	Kauai	Wild forest	Partially Obstructed	yes	10	F	3	19.1	53	63	22.6	1160.516667	2017-08-10	11:28:00	NA	NA	https://storage.googleapis.com/elegansvariation.org/photos/hawaii2017/C-0371.thumb.jpg
No Worm	Leaf litter	NA	NA	C-0375	NA	No	NA	22.1314956	-159.6604613	Kauai	Wild forest	Partially Obstructed	yes	10	A	0	19.5	50.5	62.5	23.3	1157	2017-08-10	11:30:00	NA	NA	https://storage.googleapis.com/elegansvariation.org/photos/hawaii2017/C-0375.thumb.jpg
No Worm	Leaf litter	NA	NA	C-0414	NA	No	NA	22.131561	-159.660406	Kauai	Wild forest	Partially Obstructed	yes	10	B	3	19.4	52	60.3	24	1163.346939	2017-08-10	11:17:00	NA	NA	https://storage.googleapis.com/elegansvariation.org/photos/hawaii2017/C-0414.thumb.jpg
No Worm	Leaf litter	NA	NA	C-0480	NA	No	NA	22.121828	-159.664469	Kauai	Wild forest	Partially Obstructed	yes	4	F	1	16.3	46.5	79.4	18.5	1141.628571	2017-08-07	08:29:00	NA	NA	https://storage.googleapis.com/elegansvariation.org/photos/hawaii2017/C-0480.thumb.jpg
No Worm	Leaf litter	NA	NA	C-0483	NA	No	NA	22.149137	-159.641373	Kauai	Wild forest	Partially Obstructed	yes	5	F	2	17.5	27	69.6	20.5	1254	2017-08-08	10:11:00	NA	NA	https://storage.googleapis.com/elegansvariation.org/photos/hawaii2017/C-0483.thumb.jpg
No Worm	Leaf litter	NA	NA	C-0484	NA	No	NA	22.149103	-159.641378	Kauai	Wild forest	Partially Obstructed	yes	5	F	1	17.1	36	71.1	20.5	1254	2017-08-08	10:10:00	NA	NA	https://storage.googleapis.com/elegansvariation.org/photos/hawaii2017/C-0484.thumb.jpg
No Worm	Leaf litter	NA	NA	C-0494	NA	No	NA	22.149134	-159.641347	Kauai	Wild forest	Partially Obstructed	yes	5	A	2	17.5	35	70	21.2	1254	2017-08-08	09:54:00	NA	NA	https://storage.googleapis.com/elegansvariation.org/photos/hawaii2017/C-0494.thumb.jpg
No Worm	Leaf litter	NA	NA	C-0519	NA	No	NA	22.131492	-159.660439	Kauai	Wild forest	Partially Obstructed	yes	6	D	3	17.1	46	76	19.7	1154.578571	2017-08-08	08:59:00	NA	NA	https://storage.googleapis.com/elegansvariation.org/photos/hawaii2017/C-0519.thumb.jpg
No Worm	Leaf litter	NA	NA	C-0567	NA	No	NA	22.12187081	-159.6644049	Kauai	Wild forest	Partially Obstructed	yes	4	D	2	15.7	46	77.6	18.1	1121	2017-08-07	08:24:00	NA	NA	https://storage.googleapis.com/elegansvariation.org/photos/hawaii2017/C-0567.thumb.jpg
No Worm	Leaf litter	NA	NA	C-0568	NA	No	NA	22.121875	-159.664439	Kauai	Wild forest	Partially Obstructed	yes	4	D	3	15.9	38	77.6	18.1	1116.662338	2017-08-07	08:23:00	NA	NA	https://storage.googleapis.com/elegansvariation.org/photos/hawaii2017/C-0568.thumb.jpg
No Worm	Leaf litter	NA	NA	C-0587	NA	No	NA	22.1219	-159.664387	Kauai	Wild forest	Partially Obstructed	yes	4	E	3	16.2	9.5	78.9	17.8	1121	2017-08-07	08:26:00	NA	NA	https://storage.googleapis.com/elegansvariation.org/photos/hawaii2017/C-0587.thumb.jpg
No Worm	Leaf litter	NA	NA	C-0590	NA	No	NA	22.12187081	-159.6644049	Kauai	Wild forest	Partially Obstructed	yes	4	F	2	16.8	10	77.4	25.833333333333336	1121	2017-08-07	08:30:00	NA	NA	https://storage.googleapis.com/elegansvariation.org/photos/hawaii2017/C-0590.thumb.jpg
No Worm	Leaf litter	NA	NA	C-0609	NA	No	NA	22.121864	-159.664436	Kauai	Wild forest	Partially Obstructed	yes	4	E	1	15.9	43	76.5	18.5	1126.172043	2017-08-07	08:23:00	NA	NA	https://storage.googleapis.com/elegansvariation.org/photos/hawaii2017/C-0609.thumb.jpg
No Worm	Leaf litter	NA	NA	C-0611	NA	No	NA	22.121825	-159.6643	Kauai	Wild forest	Partially Obstructed	yes	4	D	1	15.3	46.5	76.5	18.5	1119.254237	2017-08-07	08:21:00	NA	NA	https://storage.googleapis.com/elegansvariation.org/photos/hawaii2017/C-0611.thumb.jpg
No Worm	Leaf litter	NA	NA	C-0612	NA	No	NA	22.121761	-159.664294	Kauai	Wild forest	Partially Obstructed	yes	4	C	1	14.9	36	77.7	18.5	1118.484848	2017-08-07	08:20:00	NA	NA	https://storage.googleapis.com/elegansvariation.org/photos/hawaii2017/C-0612.thumb.jpg
No Worm	Leaf litter	NA	NA	C-0613	NA	No	NA	22.121858	-159.664458	Kauai	Wild forest	Partially Obstructed	yes	4	B	1	14.8	37	75	18.5	1124.896552	2017-08-07	08:17:00	NA	NA	https://storage.googleapis.com/elegansvariation.org/photos/hawaii2017/C-0613.thumb.jpg
No Worm	Leaf litter	NA	NA	C-0615	NA	No	NA	22.121931	-159.664447	Kauai	Wild forest	Partially Obstructed	yes	4	A	3	15.2	35	66.4	20.5	1133.830357	2017-08-07	08:11:00	NA	NA	https://storage.googleapis.com/elegansvariation.org/photos/hawaii2017/C-0615.thumb.jpg
No Worm	Fungus	NA	NA	C-0628	NA	No	NA	21.175572	-157.008131	Molokai	Wild forest	Partially Obstructed	yes	19	B	3	21.7	50.5	92.6	21.9	502.0326797	2017-08-12	09:35:00	NA	NA	https://storage.googleapis.com/elegansvariation.org/photos/hawaii2017/C-0628.thumb.jpg
No Worm	Leaf litter	NA	NA	C-0631	NA	No	NA	21.175453	-157.008339	Molokai	Wild forest	Partially Obstructed	yes	19	F	3	21.3	61.5	84.8	23.3	496.2056738	2017-08-12	09:45:00	NA	NA	https://storage.googleapis.com/elegansvariation.org/photos/hawaii2017/C-0631.thumb.jpg
No Worm	Leaf litter	NA	NA	C-0633	NA	No	NA	21.175783	-157.008131	Molokai	Wild forest	Partially Obstructed	yes	19	D	3	21.3	66	89.2	22.6	496.5625571	2017-08-12	09:40:00	NA	NA	https://storage.googleapis.com/elegansvariation.org/photos/hawaii2017/C-0633.thumb.jpg
No Worm	Leaf litter	NA	NA	C-0642	NA	No	NA	21.17607655	-157.0050491	Molokai	Wild forest	Partially Obstructed	yes	19	A	1	22.1	54	89.6	22.6	503.3638393	2017-08-12	09:32:00	NA	NA	https://storage.googleapis.com/elegansvariation.org/photos/hawaii2017/C-0642.thumb.jpg
No Worm	Leaf litter	NA	NA	C-0654	NA	No	NA	22.131578	-159.660444	Kauai	Wild forest	Partially Obstructed	yes	6	C	1	16.8	52	78.4	19.166666666666668	1169.581081	2017-08-08	09:01:00	NA	NA	https://storage.googleapis.com/elegansvariation.org/photos/hawaii2017/C-0654.thumb.jpg
No Worm	Flower	NA	NA	C-0702	NA	No	NA	22.07134528	-159.4175235	Kauai	Wild forest	Partially Obstructed	yes	7	F	3	28	64.5	74.7	27.4	171	2017-08-09	11:01:00	NA	NA	https://storage.googleapis.com/elegansvariation.org/photos/hawaii2017/C-0702.thumb.jpg
No Worm	Leaf litter	NA	NA	C-0708	NA	No	NA	22.131327595030427	-159.66034204987838	Kauai	Wild forest	Partially Obstructed	yes	10	A	1	17.7	56	62.2	24	1158.028409	2017-08-10	11:14:00	NA	NA	https://storage.googleapis.com/elegansvariation.org/photos/hawaii2017/C-0708.thumb.jpg
No Worm	Leaf litter	NA	NA	C-0731	NA	No	NA	22.131542	-159.660483	Kauai	Wild forest	Partially Obstructed	yes	6	A	2	16.4	56	77.9	19.166666666666668	1170.22314	2017-08-08	08:55:00	NA	NA	https://storage.googleapis.com/elegansvariation.org/photos/hawaii2017/C-0731.thumb.jpg
No Worm	Leaf litter	NA	NA	C-0754	NA	No	NA	21.177097	-157.005236	Molokai	Wild forest	Partially Obstructed	yes	18	A	0	21.7	50	73.1	24.94444444444445	488.3479319	2017-08-12	08:31:00	NA	NA	https://storage.googleapis.com/elegansvariation.org/photos/hawaii2017/C-0754.thumb.jpg
No Worm	Invertebrate	NA	NA	C-0766	NA	No	NA	21.177119	-157.005419	Molokai	Wild forest	Partially Obstructed	yes	18	D	2	21.9	64	86.3	22.2	502.0717949	2017-08-12	08:43:00	NA	NA	https://storage.googleapis.com/elegansvariation.org/photos/hawaii2017/C-0766.thumb.jpg
No Worm	Leaf litter	NA	NA	C-0777	NA	No	NA	21.176969	-157.00555	Molokai	Wild forest	Obstructed	yes	18	F	2	21	49	89.7	21.5	508.0806452	2017-08-12	08:49:00	NA	NA	https://storage.googleapis.com/elegansvariation.org/photos/hawaii2017/C-0777.thumb.jpg
No Worm	Leaf litter	NA	NA	C-0783	NA	No	NA	22.081678	-159.425981	Kauai	Wild forest	Partially Obstructed	yes	8	C	3	21.2	68	77.2	25.6	280.128655	2017-08-09	11:32:00	NA	NA	https://storage.googleapis.com/elegansvariation.org/photos/hawaii2017/C-0783.thumb.jpg
No Worm	Leaf litter	NA	NA	C-0809	NA	No	NA	22.149061	-159.641378	Kauai	Wild forest	Partially Obstructed	yes	5	C	3	18.9	46.5	69.1	20.5	1243.56962	2017-08-08	10:02:00	NA	NA	https://storage.googleapis.com/elegansvariation.org/photos/hawaii2017/C-0809.thumb.jpg
No Worm	Leaf litter	NA	NA	C-0818	NA	No	NA	22.14915	-159.641425	Kauai	Wild forest	Partially Obstructed	yes	5	A	0	18.3	48.5	69.1	21.2	1244.891089	2017-08-08	10:12:00	NA	NA	https://storage.googleapis.com/elegansvariation.org/photos/hawaii2017/C-0818.thumb.jpg
No Worm	Leaf litter	NA	NA	C-0820	NA	No	NA	22.149092	-159.641375	Kauai	Wild forest	Partially Obstructed	yes	5	E	3	18.1	56.5	72.1	21.2	1247.748634	2017-08-08	10:07:00	NA	NA	https://storage.googleapis.com/elegansvariation.org/photos/hawaii2017/C-0820.thumb.jpg
No Worm	Leaf litter	NA	NA	C-0821	NA	No	NA	22.149078	-159.641369	Kauai	Wild forest	Partially Obstructed	yes	5	D	3	18.1	48	73.5	20.5	1246.255556	2017-08-08	10:05:00	NA	NA	https://storage.googleapis.com/elegansvariation.org/photos/hawaii2017/C-0821.thumb.jpg
No Worm	Leaf litter	NA	NA	C-0904	NA	No	NA	20.79521364	-156.0758536	Maui	Wild forest	Partially Obstructed	yes	15	B	2	21.5	67.5	75.1	25.6	337	2017-08-15	15:27:00	NA	NA	https://storage.googleapis.com/elegansvariation.org/photos/hawaii2017/C-0904.thumb.jpg
No Worm	Leaf litter	NA	NA	C-0943	NA	No	NA	20.874647	-156.186294	Maui	Wild forest	Partially Obstructed	yes	15	B	3	21.7	59.5	75.1	25.6	191.689441	2017-08-15	15:27:00	NA	NA	https://storage.googleapis.com/elegansvariation.org/photos/hawaii2017/C-0943.thumb.jpg
No Worm	Fungus	NA	NA	C-0951	NA	No	NA	20.874606	-156.186331	Maui	Wild forest	Partially Obstructed	yes	15	D	3	22	NA	77.4	24.9	195.4590909	2017-08-15	15:32:00	NA	NA	https://storage.googleapis.com/elegansvariation.org/photos/hawaii2017/C-0951.thumb.jpg
No Worm	Fruit	NA	NA	C-0955	NA	No	NA	20.874619	-156.186486	Maui	Wild forest	Partially Obstructed	yes	15	F	3	22.3	24	81.1	24.3	196.4834437	2017-08-15	15:37:00	NA	NA	https://storage.googleapis.com/elegansvariation.org/photos/hawaii2017/C-0955.thumb.jpg
No Worm	Leaf litter	NA	NA	C-0965	NA	No	NA	22.131499	-159.660442	Kauai	Wild forest	Obstructed	yes	10	A	2	19.5	62.5	62.2	24	1157	2017-08-10	11:14:00	NA	NA	https://storage.googleapis.com/elegansvariation.org/photos/hawaii2017/C-0965.thumb.jpg
No Worm	Leaf litter	NA	NA	C-0970	NA	No	NA	22.131623	-159.660546	Kauai	Wild forest	Partially Obstructed	yes	10	E	2	22.5	24.5	60.5	23.3	1157	2017-08-10	11:25:00	NA	NA	https://storage.googleapis.com/elegansvariation.org/photos/hawaii2017/C-0970.thumb.jpg
No Worm	Leaf litter	NA	NA	C-0977	NA	No	NA	22.1315326	-159.6604194	Kauai	Wild forest	Partially Obstructed	yes	10	B	2	19.5	62.5	60.3	24	1157	2017-08-10	11:17:00	NA	NA	https://storage.googleapis.com/elegansvariation.org/photos/hawaii2017/C-0977.thumb.jpg
No Worm	Leaf litter	NA	NA	C-0978	NA	No	NA	22.131663	-159.660501	Kauai	Wild forest	Partially Obstructed	yes	10	F	2	17.8	69	63	22.6	1157	2017-08-10	11:28:00	NA	NA	https://storage.googleapis.com/elegansvariation.org/photos/hawaii2017/C-0978.thumb.jpg
No Worm	Leaf litter	NA	NA	C-0981	NA	No	NA	22.131536	-159.660422	Kauai	Wild forest	Partially Obstructed	yes	10	C	2	19.7	26	64.3	23.3	1157	2017-08-10	11:20:00	NA	NA	https://storage.googleapis.com/elegansvariation.org/photos/hawaii2017/C-0981.thumb.jpg
No Worm	Leaf litter	NA	NA	C-0987	NA	No	NA	22.121981	-159.664458	Kauai	Wild forest	Partially Obstructed	yes	12	A	3	18.3	57.5	79.4	21.2	1119.354167	2017-08-11	14:02:00	NA	NA	https://storage.googleapis.com/elegansvariation.org/photos/hawaii2017/C-0987.thumb.jpg
No Worm	Leaf litter	NA	NA	C-1003	NA	No	NA	22.121858	-159.664392	Kauai	Wild forest	Partially Obstructed	yes	12	D	3	18.4	55.5	79.1	21.2	1114.929078	2017-08-11	14:06:00	NA	NA	https://storage.googleapis.com/elegansvariation.org/photos/hawaii2017/C-1003.thumb.jpg
No Worm	Leaf litter	NA	NA	C-1005	NA	No	NA	22.131521	-159.660421	Kauai	Wild forest	Partially Obstructed	yes	10	D	2	19.1	42.5	63.1	23.3	1157	2017-08-10	11:22:00	NA	NA	https://storage.googleapis.com/elegansvariation.org/photos/hawaii2017/C-1005.thumb.jpg
No Worm	Leaf litter	NA	NA	C-1007	NA	No	NA	22.121836	-159.664392	Kauai	Wild forest	Partially Obstructed	yes	12	D	2	18.1	62	77.4	21.1	1114.948454	2017-08-11	14:07:00	NA	NA	https://storage.googleapis.com/elegansvariation.org/photos/hawaii2017/C-1007.thumb.jpg
No Worm	Leaf litter	NA	NA	C-1015	NA	No	NA	22.121783	-159.664339	Kauai	Wild forest	Partially Obstructed	yes	12	C	3	19.4	53.5	78.9	21.2	1113.664122	2017-08-11	14:05:00	NA	NA	https://storage.googleapis.com/elegansvariation.org/photos/hawaii2017/C-1015.thumb.jpg
No Worm	Leaf litter	NA	NA	C-1016	NA	No	NA	22.194364	-159.478614	Kauai	Wild forest	Partially Obstructed	yes	11	A	1	24.3	55	77.5	26.38888888888889	198.7314488	2017-08-10	11:31:00	NA	NA	https://storage.googleapis.com/elegansvariation.org/photos/hawaii2017/C-1016.thumb.jpg
No Worm	Leaf litter	NA	NA	C-1058	NA	No	NA	21.138089	-156.965894	Molokai	Wild forest	Partially Obstructed	yes	20	F	3	21.3	64.5	71.6	24.7	754.6213592	2017-08-12	12:32:00	NA	NA	https://storage.googleapis.com/elegansvariation.org/photos/hawaii2017/C-1058.thumb.jpg
No Worm	Leaf litter	NA	NA	C-1063	NA	?	NA	22.131572000011897	-159.66048349997737	Kauai	Wild forest	Partially Obstructed	yes	10	D	1	18.4	33.8	63.1	23.3	1158.028409	2017-08-10	11:22:00	NA	NA	https://storage.googleapis.com/elegansvariation.org/photos/hawaii2017/C-1063.thumb.jpg
No Worm	Leaf litter	NA	NA	C-1064	NA	No	NA	22.131548500000196	-159.6604140000007	Kauai	Wild forest	Partially Obstructed	yes	10	B	1	19	40	60.3	24	1158.028409	2017-08-10	11:17:00	NA	NA	https://storage.googleapis.com/elegansvariation.org/photos/hawaii2017/C-1064.thumb.jpg
No Worm	Fungus	NA	NA	C-1068	NA	No	NA	22.071372	-159.417522	Kauai	Wild forest	Partially Obstructed	yes	7	A	1	24.9	58	70.6	28.1	162.3660131	2017-08-09	10:46:00	NA	NA	https://storage.googleapis.com/elegansvariation.org/photos/hawaii2017/C-1068.thumb.jpg
No Worm	Leaf litter	NA	NA	C-1140	NA	No	NA	20.949421	-156.535316	Maui	Wild forest	Partially Obstructed	yes	13	C	2	21.3	69	87.7	23.6	439	2017-08-13	15:37:00	NA	NA	https://storage.googleapis.com/elegansvariation.org/photos/hawaii2017/C-1140.thumb.jpg
No Worm	Fruit	NA	NA	C-1272	NA	No	NA	20.723333	-156.304358	Maui	Wild forest	Partially Obstructed	yes	14	A	3	15.7	72	80.7	19.2	1642.326531	2017-08-14	14:14:00	NA	NA	https://storage.googleapis.com/elegansvariation.org/photos/hawaii2017/C-1272.thumb.jpg
No Worm	Leaf litter	NA	NA	C-1276	NA	No	NA	20.723239	-156.304311	Maui	Wild forest	Partially Obstructed	yes	14	E	3	14.4	70	85.3	17.8	1643.257732	2017-08-14	14:21:00	NA	NA	https://storage.googleapis.com/elegansvariation.org/photos/hawaii2017/C-1276.thumb.jpg
No Worm	Fungus	NA	NA	C-1316	NA	No	NA	20.767886	-156.237149	Maui	Wild forest	Partially Obstructed	yes	16	A	2	10.8	64	86.8	14.7	2075	2017-08-16	15:48:00	NA	NA	https://storage.googleapis.com/elegansvariation.org/photos/hawaii2017/C-1316.thumb.jpg
No Worm	Leaf litter	NA	NA	C-1366	NA	No	NA	21.137958	-156.965969	Molokai	Wild forest	Partially Obstructed	yes	20	A	1	22.3	68.5	66.2	26	752.0103093	2017-08-12	12:14:00	NA	NA	https://storage.googleapis.com/elegansvariation.org/photos/hawaii2017/C-1366.thumb.jpg
No Worm	Leaf litter	NA	NA	C-1370	NA	No	NA	21.138067	-156.965861	Molokai	Wild forest	Partially Obstructed	yes	20	B	1	22	65.5	68.6	26	753.7122302	2017-08-12	12:24:00	NA	NA	https://storage.googleapis.com/elegansvariation.org/photos/hawaii2017/C-1370.thumb.jpg
No Worm	Leaf litter	NA	NA	C-1374	NA	No	NA	21.138125	-156.965911	Molokai	Wild forest	Partially Obstructed	yes	20	C	1	22.3	53	73.5	25.3	748.1057692	2017-08-12	12:26:00	NA	NA	https://storage.googleapis.com/elegansvariation.org/photos/hawaii2017/C-1374.thumb.jpg
No Worm	Leaf litter	NA	NA	C-1471	NA	No	NA	20.767893	-156.237148	Maui	Wild forest	Partially Obstructed	yes	16	B	2	10.4	52.5	83.4	14	2075	2017-08-16	15:50:00	NA	NA	https://storage.googleapis.com/elegansvariation.org/photos/hawaii2017/C-1471.thumb.jpg
No Worm	Fruit	NA	NA	C-1518	NA	No	NA	20.66489	-156.049033	Maui	Wild forest	Partially Obstructed	yes	17	C	2	25.9	67	70.6	26.8	114	2017-08-17	15:42:00	NA	NA	https://storage.googleapis.com/elegansvariation.org/photos/hawaii2017/C-1518.thumb.jpg
No Worm	Leaf litter	NA	NA	C-2551	NA	?	NA	20.887892	-156.310106	Maui	Wild forest	Partially Obstructed	yes	15	F	1	23.3	66	81.1	24.3	197.5632184	2017-08-15	15:37:00	NA	NA	https://storage.googleapis.com/elegansvariation.org/photos/hawaii2017/C-2551.thumb.jpg
No Worm	Fruit	NA	NA	C-2596	NA	No	NA	20.664928	-156.04902	Maui	Wild forest	Partially Obstructed	yes	17	A	0	26.6	64	70.8	26.7	114	2017-08-17	15:34:00	NA	NA	https://storage.googleapis.com/elegansvariation.org/photos/hawaii2017/C-2596.thumb.jpg
No Worm	Fruit	NA	NA	C-2598	NA	No	NA	20.664924500000645	-156.04903500000034	Maui	Wild forest	Partially Obstructed	yes	17	A	1	26.2	63.5	69.1	26.7	114	2017-08-17	15:38:00	NA	NA	https://storage.googleapis.com/elegansvariation.org/photos/hawaii2017/C-2598.thumb.jpg
No Worm	Leaf litter	NA	NA	C-2599	NA	No	NA	20.664919000000207	-156.0490165	Maui	Wild forest	Partially Obstructed	yes	17	B	1	23.9	62.5	70.5	26.7	114	2017-08-17	15:40:00	NA	NA	https://storage.googleapis.com/elegansvariation.org/photos/hawaii2017/C-2599.thumb.jpg
No Worm	Fruit	NA	NA	C-2602	NA	No	NA	20.664844	-156.049072	Maui	Wild forest	Partially Obstructed	yes	17	F	1	24.9	58.5	74	26.7	98.69832402	2017-08-17	15:48:00	NA	NA	https://storage.googleapis.com/elegansvariation.org/photos/hawaii2017/C-2602.thumb.jpg
No Worm	Leaf litter	NA	NA	C-2605	NA	No	NA	20.664903	-156.049008	Maui	Wild forest	Partially Obstructed	yes	17	F	3	25.3	23	74	26.7	100.0090498	2017-08-17	15:49:00	NA	NA	https://storage.googleapis.com/elegansvariation.org/photos/hawaii2017/C-2605.thumb.jpg
No Worm	Leaf litter	NA	NA	C-2649	NA	No	NA	22.121969	-159.664528	Kauai	Wild forest	Partially Obstructed	yes	12	A	0	19.1	57	73.7	22.6	1127.866667	2017-08-11	14:01:00	NA	NA	https://storage.googleapis.com/elegansvariation.org/photos/hawaii2017/C-2649.thumb.jpg
No Worm	Leaf litter	NA	NA	C-2653	NA	No	NA	22.121914	-159.664392	Kauai	Wild forest	Partially Obstructed	yes	12	B	2	17.2	59	81.8	20.5	1126.847458	2017-08-11	14:04:00	NA	NA	https://storage.googleapis.com/elegansvariation.org/photos/hawaii2017/C-2653.thumb.jpg
No Worm	Leaf litter	NA	NA	C-2654	NA	No	NA	22.121947	-159.664381	Kauai	Wild forest	Partially Obstructed	yes	12	C	1	17.2	58	80.9	20.1	1126.466102	2017-08-11	14:05:00	NA	NA	https://storage.googleapis.com/elegansvariation.org/photos/hawaii2017/C-2654.thumb.jpg
No Worm	Leaf litter	NA	NA	C-2655	NA	No	NA	22.121864	-159.664475	Kauai	Wild forest	Partially Obstructed	yes	12	C	2	17.9	60	80.9	20.53	1127.708333	2017-08-11	14:06:00	NA	NA	https://storage.googleapis.com/elegansvariation.org/photos/hawaii2017/C-2655.thumb.jpg
No Worm	Leaf litter	NA	NA	C-2656	NA	No	NA	22.121872	-159.664464	Kauai	Wild forest	Partially Obstructed	yes	12	D	1	17.6	52	82.3	21.2	1127.708333	2017-08-11	14:06:00	NA	NA	https://storage.googleapis.com/elegansvariation.org/photos/hawaii2017/C-2656.thumb.jpg
No Worm	Leaf litter	NA	NA	C-2657	NA	No	NA	22.121883	-159.664517	Kauai	Wild forest	Partially Obstructed	yes	12	E	3	17	60.5	78	21.2	1127.708333	2017-08-11	14:07:00	NA	NA	https://storage.googleapis.com/elegansvariation.org/photos/hawaii2017/C-2657.thumb.jpg
No Worm	Leaf litter	NA	NA	C-2816	NA	No	NA	19.423864	-155.222478	Big Island	Rural garden	Partially Obstructed	yes	1	C	3	16.7	71.5	94	18.5	1119.423197	2017-08-14	08:01:00	NA	NA	https://storage.googleapis.com/elegansvariation.org/photos/hawaii2017/C-2816.thumb.jpg
No Worm	Leaf litter	NA	NA	C-2818	NA	No	NA	19.423881	-155.222547	Big Island	Rural garden	Partially Obstructed	yes	1	E	3	17.1	70	94	18.5	1119.067568	2017-08-14	08:05:00	NA	NA	https://storage.googleapis.com/elegansvariation.org/photos/hawaii2017/C-2818.thumb.jpg
No Worm	Leaf litter	NA	NA	C-2820	NA	No	NA	19.42388613	-155.222485	Big Island	Rural garden	Partially Obstructed	yes	1	F	3	17.6	70.5	94	18.5	1126	2017-08-14	08:08:00	NA	NA	https://storage.googleapis.com/elegansvariation.org/photos/hawaii2017/C-2820.thumb.jpg
No Worm	Fruit	NA	NA	C-2860	NA	No	NA	20.039911	-155.441617	Big Island	Wild forest	Partially Obstructed	yes	3	B	3	21	NA	88.8	22.6	670.2622951	2017-08-17	14:52:00	NA	NA	https://storage.googleapis.com/elegansvariation.org/photos/hawaii2017/C-2860.thumb.jpg
No Worm	Leaf litter	NA	NA	C-2864	NA	No	NA	19.423889	-155.222447	Big Island	Rural garden	Partially Obstructed	yes	1	F	1	14.2	71.5	94	18.5	1118.321244	2017-08-14	08:07:00	NA	NA	https://storage.googleapis.com/elegansvariation.org/photos/hawaii2017/C-2864.thumb.jpg
No Worm	Leaf litter	NA	NA	C-3055	NA	No	NA	19.423853	-155.222453	Big Island	Rural garden	Partially Obstructed	yes	1	B	1	16.1	71.5	94	18.5	1116.554217	2017-08-14	07:59:00	NA	NA	https://storage.googleapis.com/elegansvariation.org/photos/hawaii2017/C-3055.thumb.jpg
No Worm	Leaf litter	NA	NA	C-3308	NA	?	NA	20.036875	-155.441708	Big Island	Wild forest	Partially Obstructed	yes	2	D	2	20.2	62	75.5	24	676.7084746	2017-08-17	14:10:00	NA	NA	https://storage.googleapis.com/elegansvariation.org/photos/hawaii2017/C-3308.thumb.jpg
