# Supplementary material for: Deep sampling of Hawaiian Caenorhabditis elegans reveals high genetic diversity and admixture with global populations
Source: eLife journal article supplement (doi:10.7554/elife.50465), 2019-12-03
Supplement: supp [file elife-50465-supp-v1.zip › elife_poa_e50465_Figure_3_figure_supplement_2_source_data_1.csv]

c_label	species_id	worms_on_sample	approximate_number_of_worms	latitude	longitude	island	substrate	landscape	sky_view	gridsect	gridsect_number	gridsect_direction	gridsect_radius	substrate_temperature	substrate_moisture	ambient_humidity	ambient_temperature	altitude	date	time	photo_url_thumb	fixed_substrate
C-0065	C. oiwi	Yes	Proliferating (25+)	21.349858	-157.805975	Oahu	Rotting flower	Wild forest	Obstructed	no	NA	NA	NA	21.8	46	77.8	24	322.8517588	2017-08-03	09:15:00	https://storage.googleapis.com/elegansvariation.org/photos/hawaii2017/C-0065.thumb.jpg	Flower
C-0065	C. briggsae	Yes	Proliferating (25+)	21.349858	-157.805975	Oahu	Rotting flower	Wild forest	Obstructed	no	NA	NA	NA	21.8	46	77.8	24	322.8517588	2017-08-03	09:15:00	https://storage.googleapis.com/elegansvariation.org/photos/hawaii2017/C-0065.thumb.jpg	Flower
C-0271	Oscheius sp.	Yes	Few (4-10)	22.081467	-159.426286	Kauai	Leaf litter	Wild forest	Obstructed	yes	9	D	2	23	59	77.5	24.9	281.0586957	2017-08-09	11:48:00	https://storage.googleapis.com/elegansvariation.org/photos/hawaii2017/C-0271.thumb.jpg	Leaf litter
C-0271	C. briggsae	Yes	Few (4-10)	22.081467	-159.426286	Kauai	Leaf litter	Wild forest	Obstructed	yes	9	D	2	23	59	77.5	24.9	281.0586957	2017-08-09	11:48:00	https://storage.googleapis.com/elegansvariation.org/photos/hawaii2017/C-0271.thumb.jpg	Leaf litter
C-0271	C. briggsae	Yes	Few (4-10)	22.081467	-159.426286	Kauai	Leaf litter	Wild forest	Obstructed	yes	9	D	2	23	59	77.5	24.9	281.0586957	2017-08-09	11:48:00	https://storage.googleapis.com/elegansvariation.org/photos/hawaii2017/C-0271.thumb.jpg	Leaf litter
C-0314	C. briggsae	Yes	Proliferating (25+)	22.198956	-159.476047	Kauai	Leaf litter	Wild forest	Partially Obstructed	no	NA	NA	NA	29.2	64.5	82.2	26.33333333333334	108.8898551	2017-08-10	09:08:00	https://storage.googleapis.com/elegansvariation.org/photos/hawaii2017/C-0314.thumb.jpg	Leaf litter
C-0314	Oscheius sp.	Yes	Proliferating (25+)	22.198956	-159.476047	Kauai	Leaf litter	Wild forest	Partially Obstructed	no	NA	NA	NA	29.2	64.5	82.2	26.33333333333334	108.8898551	2017-08-10	09:08:00	https://storage.googleapis.com/elegansvariation.org/photos/hawaii2017/C-0314.thumb.jpg	Leaf litter
C-0343	Teratorhabditis sp.	Yes	Proliferating (25+)	20.94835	-156.536372	Maui	Fungus	Wild forest	Partially Obstructed	no	NA	NA	NA	22.8	65	82.5	25.3	439.7731959	2017-08-13	15:55:00	https://storage.googleapis.com/elegansvariation.org/photos/hawaii2017/C-0343.thumb.jpg	Fungus
C-0343	C. briggsae	Yes	Proliferating (25+)	20.94835	-156.536372	Maui	Fungus	Wild forest	Partially Obstructed	no	NA	NA	NA	22.8	65	82.5	25.3	439.7731959	2017-08-13	15:55:00	https://storage.googleapis.com/elegansvariation.org/photos/hawaii2017/C-0343.thumb.jpg	Fungus
C-0380	C. briggsae	Yes	Proliferating (25+)	20.807406	-156.096654	Maui	Fruit/nut/vegetable	Wild forest	Partially Obstructed	no	NA	NA	NA	25.4	69	81.2	24.3	291	2017-08-15	10:10:00	https://storage.googleapis.com/elegansvariation.org/photos/hawaii2017/C-0380.thumb.jpg	Fruit
C-0380	C. tropicalis	Yes	Proliferating (25+)	20.807406	-156.096654	Maui	Fruit/nut/vegetable	Wild forest	Partially Obstructed	no	NA	NA	NA	25.4	69	81.2	24.3	291	2017-08-15	10:10:00	https://storage.googleapis.com/elegansvariation.org/photos/hawaii2017/C-0380.thumb.jpg	Fruit
C-0380	C. briggsae	Yes	Proliferating (25+)	20.807406	-156.096654	Maui	Fruit/nut/vegetable	Wild forest	Partially Obstructed	no	NA	NA	NA	25.4	69	81.2	24.3	291	2017-08-15	10:10:00	https://storage.googleapis.com/elegansvariation.org/photos/hawaii2017/C-0380.thumb.jpg	Fruit
C-0380	C. briggsae	Yes	Proliferating (25+)	20.807406	-156.096654	Maui	Fruit/nut/vegetable	Wild forest	Partially Obstructed	no	NA	NA	NA	25.4	69	81.2	24.3	291	2017-08-15	10:10:00	https://storage.googleapis.com/elegansvariation.org/photos/hawaii2017/C-0380.thumb.jpg	Fruit
C-0380	C. tropicalis	Yes	Proliferating (25+)	20.807406	-156.096654	Maui	Fruit/nut/vegetable	Wild forest	Partially Obstructed	no	NA	NA	NA	25.4	69	81.2	24.3	291	2017-08-15	10:10:00	https://storage.googleapis.com/elegansvariation.org/photos/hawaii2017/C-0380.thumb.jpg	Fruit
C-0380	C. briggsae	Yes	Proliferating (25+)	20.807406	-156.096654	Maui	Fruit/nut/vegetable	Wild forest	Partially Obstructed	no	NA	NA	NA	25.4	69	81.2	24.3	291	2017-08-15	10:10:00	https://storage.googleapis.com/elegansvariation.org/photos/hawaii2017/C-0380.thumb.jpg	Fruit
C-1369	Choriorhabditis sp.	Yes	Some (11-25)	20.681872	-156.337064	Maui	Leaf litter	Wild forest	Partially Obstructed	no	NA	NA	NA	15.1	68	93.4	17.1	1670.086207	2017-08-14	11:38:00	https://storage.googleapis.com/elegansvariation.org/photos/hawaii2017/C-1369.thumb.jpg	Leaf litter
C-1369	C. briggsae	Yes	Some (11-25)	20.681872	-156.337064	Maui	Leaf litter	Wild forest	Partially Obstructed	no	NA	NA	NA	15.1	68	93.4	17.1	1670.086207	2017-08-14	11:38:00	https://storage.googleapis.com/elegansvariation.org/photos/hawaii2017/C-1369.thumb.jpg	Leaf litter
C-1369	Choriorhabditis sp.	Yes	Some (11-25)	20.681872	-156.337064	Maui	Leaf litter	Wild forest	Partially Obstructed	no	NA	NA	NA	15.1	68	93.4	17.1	1670.086207	2017-08-14	11:38:00	https://storage.googleapis.com/elegansvariation.org/photos/hawaii2017/C-1369.thumb.jpg	Leaf litter
C-1513	Panagrolaimus sp.	Yes	Some (11-25)	20.675109	-156.036111	Maui	Leaf litter	Wild forest	Partially Obstructed	no	NA	NA	NA	25.1	66	73.3	27	106	2017-08-17	16:59:00	https://storage.googleapis.com/elegansvariation.org/photos/hawaii2017/C-1513.thumb.jpg	Leaf litter
C-1513	Panagrolaimus sp.	Yes	Some (11-25)	20.675109	-156.036111	Maui	Leaf litter	Wild forest	Partially Obstructed	no	NA	NA	NA	25.1	66	73.3	27	106	2017-08-17	16:59:00	https://storage.googleapis.com/elegansvariation.org/photos/hawaii2017/C-1513.thumb.jpg	Leaf litter
C-1513	C. briggsae	Yes	Some (11-25)	20.675109	-156.036111	Maui	Leaf litter	Wild forest	Partially Obstructed	no	NA	NA	NA	25.1	66	73.3	27	106	2017-08-17	16:59:00	https://storage.googleapis.com/elegansvariation.org/photos/hawaii2017/C-1513.thumb.jpg	Leaf litter
C-2756	Panagrolaimus sp.	Yes	Proliferating (25+)	19.697617	-155.975908	Big Island	Leaf litter	Wild forest	Partially Obstructed	no	NA	NA	NA	23.2	38	71.3	24.66666666666667	463.9475138	2017-08-15	13:31:00	https://storage.googleapis.com/elegansvariation.org/photos/hawaii2017/C-2756.thumb.jpg	Leaf litter
C-2756	Panagrolaimus sp.	Yes	Proliferating (25+)	19.697617	-155.975908	Big Island	Leaf litter	Wild forest	Partially Obstructed	no	NA	NA	NA	23.2	38	71.3	24.66666666666667	463.9475138	2017-08-15	13:31:00	https://storage.googleapis.com/elegansvariation.org/photos/hawaii2017/C-2756.thumb.jpg	Leaf litter
C-2756	C. briggsae	Yes	Proliferating (25+)	19.697617	-155.975908	Big Island	Leaf litter	Wild forest	Partially Obstructed	no	NA	NA	NA	23.2	38	71.3	24.66666666666667	463.9475138	2017-08-15	13:31:00	https://storage.googleapis.com/elegansvariation.org/photos/hawaii2017/C-2756.thumb.jpg	Leaf litter
C-2857	C. briggsae	Yes	Proliferating (25+)	19.590717	-155.067906	Big Island	Leaf litter	Agricultural land	Partially Obstructed	no	NA	NA	NA	26.6	68.5	65.5	28.8	246.0480769	2017-08-13	15:39:00	https://storage.googleapis.com/elegansvariation.org/photos/hawaii2017/C-2857.thumb.jpg	Leaf litter
C-2857	C. briggsae	Yes	Proliferating (25+)	19.590717	-155.067906	Big Island	Leaf litter	Agricultural land	Partially Obstructed	no	NA	NA	NA	26.6	68.5	65.5	28.8	246.0480769	2017-08-13	15:39:00	https://storage.googleapis.com/elegansvariation.org/photos/hawaii2017/C-2857.thumb.jpg	Leaf litter
C-2857	C. briggsae	Yes	Proliferating (25+)	19.590717	-155.067906	Big Island	Leaf litter	Agricultural land	Partially Obstructed	no	NA	NA	NA	26.6	68.5	65.5	28.8	246.0480769	2017-08-13	15:39:00	https://storage.googleapis.com/elegansvariation.org/photos/hawaii2017/C-2857.thumb.jpg	Leaf litter
C-2857	C. tropicalis	Yes	Proliferating (25+)	19.590717	-155.067906	Big Island	Leaf litter	Agricultural land	Partially Obstructed	no	NA	NA	NA	26.6	68.5	65.5	28.8	246.0480769	2017-08-13	15:39:00	https://storage.googleapis.com/elegansvariation.org/photos/hawaii2017/C-2857.thumb.jpg	Leaf litter
C-3010	Rhabditis terricola	Yes	Few (4-10)	19.429439	-155.261608	Big Island	Leaf litter	Wild forest	Partially Obstructed	no	NA	NA	NA	17.4	72	82.8	21.9	1169.283019	2017-08-14	11:56:00	https://storage.googleapis.com/elegansvariation.org/photos/hawaii2017/C-3010.thumb.jpg	Leaf litter
C-3010	Panagrolaimus sp.	Yes	Few (4-10)	19.429439	-155.261608	Big Island	Leaf litter	Wild forest	Partially Obstructed	no	NA	NA	NA	17.4	72	82.8	21.9	1169.283019	2017-08-14	11:56:00	https://storage.googleapis.com/elegansvariation.org/photos/hawaii2017/C-3010.thumb.jpg	Leaf litter
C-3098	Oscheius sp.	Yes	Few (4-10)	20.0656	-155.520633	Big Island	Leaf litter	Wild forest	Partially Obstructed	no	NA	NA	NA	24.2	69	61	26.7	681.1035857	2017-08-17	11:48:00	https://storage.googleapis.com/elegansvariation.org/photos/hawaii2017/C-3098.thumb.jpg	Leaf litter
C-3098	Oscheius sp.	Yes	Few (4-10)	20.0656	-155.520633	Big Island	Leaf litter	Wild forest	Partially Obstructed	no	NA	NA	NA	24.2	69	61	26.7	681.1035857	2017-08-17	11:48:00	https://storage.googleapis.com/elegansvariation.org/photos/hawaii2017/C-3098.thumb.jpg	Leaf litter
C-3098	Heterohabditis zealandica	Yes	Few (4-10)	20.0656	-155.520633	Big Island	Leaf litter	Wild forest	Partially Obstructed	no	NA	NA	NA	24.2	69	61	26.7	681.1035857	2017-08-17	11:48:00	https://storage.googleapis.com/elegansvariation.org/photos/hawaii2017/C-3098.thumb.jpg	Leaf litter
C-3266	C. elegans	Yes	Some (11-25)	19.115886	-155.818386	Big Island	Rotting wood	Wild forest	Full	no	NA	NA	NA	20.4	42	76.3	25.388888888888893	651.7065217	2017-08-15	09:52:00	https://storage.googleapis.com/elegansvariation.org/photos/hawaii2017/C-3266.thumb.jpg	Vegetation
C-3266	Oscheius sp.	Yes	Some (11-25)	19.115886	-155.818386	Big Island	Rotting wood	Wild forest	Full	no	NA	NA	NA	20.4	42	76.3	25.388888888888893	651.7065217	2017-08-15	09:52:00	https://storage.googleapis.com/elegansvariation.org/photos/hawaii2017/C-3266.thumb.jpg	Vegetation
C-3266	C. elegans	Yes	Some (11-25)	19.115886	-155.818386	Big Island	Rotting wood	Wild forest	Full	no	NA	NA	NA	20.4	42	76.3	25.388888888888893	651.7065217	2017-08-15	09:52:00	https://storage.googleapis.com/elegansvariation.org/photos/hawaii2017/C-3266.thumb.jpg	Vegetation
