# Supplementary material for: Deep sampling of Hawaiian Caenorhabditis elegans reveals high genetic diversity and admixture with global populations
Source: eLife journal article supplement (doi:10.7554/elife.50465), 2019-12-03
Supplement: supp [file elife-50465-supp-v1.zip › elife_poa_e50465_Figure_3_figure_supplement_3_source_data_1.csv]

isotype	strain	c_label	s_label	worms_on_sample	approximate_number_of_worms	latitude	longitude	island	landscape	sky_view	gridsect	gridsect_number	gridsect_direction	gridsect_radius	substrate_temperature	substrate_moisture	ambient_humidity	ambient_temperature	altitude	date	time	pcr_positive	species_id	photo_url_thumb	fixed_substrate
No isotype	NA	C-2812	S-06319	Yes	Very Few (1-3)	19.4239	-155.222514	Big Island	Rural garden	Partially Obstructed	yes	1	A	3	17	68	94	18.5	1118.70566	2017-08-14	07:57:00	0	Unknown	https://storage.googleapis.com/elegansvariation.org/photos/hawaii2017/C-2812.thumb.jpg	Leaf litter
No isotype	NA	C-2813	NA	Tracks	NA	19.423789	-155.22245	Big Island	Rural garden	Partially Obstructed	yes	1	B	3	17.2	78	94	18.5	1117.311688	2017-08-14	07:59:00	NA	NA	https://storage.googleapis.com/elegansvariation.org/photos/hawaii2017/C-2813.thumb.jpg	Leaf litter
No isotype	NA	C-2816	NA	No	NA	19.423864	-155.222478	Big Island	Rural garden	Partially Obstructed	yes	1	C	3	16.7	71.5	94	18.5	1119.423197	2017-08-14	08:01:00	NA	NA	https://storage.googleapis.com/elegansvariation.org/photos/hawaii2017/C-2816.thumb.jpg	Leaf litter
No isotype	NA	C-2817	NA	Tracks	NA	19.4239	-155.222383	Big Island	Rural garden	Partially Obstructed	yes	1	D	3	17	68.5	94	18.5	1118.594203	2017-08-14	08:03:00	NA	NA	https://storage.googleapis.com/elegansvariation.org/photos/hawaii2017/C-2817.thumb.jpg	Leaf litter
No isotype	NA	C-2818	NA	No	NA	19.423881	-155.222547	Big Island	Rural garden	Partially Obstructed	yes	1	E	3	17.1	70	94	18.5	1119.067568	2017-08-14	08:05:00	NA	NA	https://storage.googleapis.com/elegansvariation.org/photos/hawaii2017/C-2818.thumb.jpg	Leaf litter
No isotype	NA	C-2820	NA	No	NA	19.42388613	-155.222485	Big Island	Rural garden	Partially Obstructed	yes	1	F	3	17.6	70.5	94	18.5	1126	2017-08-14	08:08:00	NA	NA	https://storage.googleapis.com/elegansvariation.org/photos/hawaii2017/C-2820.thumb.jpg	Leaf litter
No isotype	NA	C-2824	S-07418	Yes	Few (4-10)	20.039858	-155.441608	Big Island	Wild forest	Partially Obstructed	yes	3	E	2	20.6	NA	83.1	22.6	670.8930041	2017-08-17	14:56:00	NA	NA	https://storage.googleapis.com/elegansvariation.org/photos/hawaii2017/C-2824.thumb.jpg	Fruit
No isotype	NA	C-2824	S-07419	Yes	Few (4-10)	20.039858	-155.441608	Big Island	Wild forest	Partially Obstructed	yes	3	E	2	20.6	NA	83.1	22.6	670.8930041	2017-08-17	14:56:00	0	Unknown	https://storage.googleapis.com/elegansvariation.org/photos/hawaii2017/C-2824.thumb.jpg	Fruit
ECA760	ECA779	C-2824	S-07420	Yes	Few (4-10)	20.039858	-155.441608	Big Island	Wild forest	Partially Obstructed	yes	3	E	2	20.6	NA	83.1	22.6	670.8930041	2017-08-17	14:56:00	1	C. elegans	https://storage.googleapis.com/elegansvariation.org/photos/hawaii2017/C-2824.thumb.jpg	Fruit
ECA760	ECA780	C-2824	S-07421	Yes	Few (4-10)	20.039858	-155.441608	Big Island	Wild forest	Partially Obstructed	yes	3	E	2	20.6	NA	83.1	22.6	670.8930041	2017-08-17	14:56:00	1	C. elegans	https://storage.googleapis.com/elegansvariation.org/photos/hawaii2017/C-2824.thumb.jpg	Fruit
ECA760	ECA808	C-2824	S-07422	Yes	Few (4-10)	20.039858	-155.441608	Big Island	Wild forest	Partially Obstructed	yes	3	E	2	20.6	NA	83.1	22.6	670.8930041	2017-08-17	14:56:00	1	C. elegans	https://storage.googleapis.com/elegansvariation.org/photos/hawaii2017/C-2824.thumb.jpg	Fruit
ECA778	ECA781	C-2824	S-07423	Yes	Few (4-10)	20.039858	-155.441608	Big Island	Wild forest	Partially Obstructed	yes	3	E	2	20.6	NA	83.1	22.6	670.8930041	2017-08-17	14:56:00	1	C. elegans	https://storage.googleapis.com/elegansvariation.org/photos/hawaii2017/C-2824.thumb.jpg	Fruit
No isotype	NA	C-2828	S-07314	Yes	Some (11-25)	20.039869	-155.441619	Big Island	Wild forest	Partially Obstructed	yes	3	F	3	21.2	67.5	84.2	22.6	670.8197674	2017-08-17	14:57:00	0	Unknown	https://storage.googleapis.com/elegansvariation.org/photos/hawaii2017/C-2828.thumb.jpg	Leaf litter
ECA760	ECA760	C-2828	S-07315	Yes	Some (11-25)	20.039869	-155.441619	Big Island	Wild forest	Partially Obstructed	yes	3	F	3	21.2	67.5	84.2	22.6	670.8197674	2017-08-17	14:57:00	1	C. elegans	https://storage.googleapis.com/elegansvariation.org/photos/hawaii2017/C-2828.thumb.jpg	Leaf litter
No isotype	NA	C-2828	S-07336	Yes	Some (11-25)	20.039869	-155.441619	Big Island	Wild forest	Partially Obstructed	yes	3	F	3	21.2	67.5	84.2	22.6	670.8197674	2017-08-17	14:57:00	0	Unknown	https://storage.googleapis.com/elegansvariation.org/photos/hawaii2017/C-2828.thumb.jpg	Leaf litter
ECA760	ECA769	C-2828	S-07372	Yes	Some (11-25)	20.039869	-155.441619	Big Island	Wild forest	Partially Obstructed	yes	3	F	3	21.2	67.5	84.2	22.6	670.8197674	2017-08-17	14:57:00	1	C. elegans	https://storage.googleapis.com/elegansvariation.org/photos/hawaii2017/C-2828.thumb.jpg	Leaf litter
No isotype	NA	C-2828	S-07374	Yes	Some (11-25)	20.039869	-155.441619	Big Island	Wild forest	Partially Obstructed	yes	3	F	3	21.2	67.5	84.2	22.6	670.8197674	2017-08-17	14:57:00	NA	NA	https://storage.googleapis.com/elegansvariation.org/photos/hawaii2017/C-2828.thumb.jpg	Leaf litter
ECA760	ECA739	C-2828	S-07375	Yes	Some (11-25)	20.039869	-155.441619	Big Island	Wild forest	Partially Obstructed	yes	3	F	3	21.2	67.5	84.2	22.6	670.8197674	2017-08-17	14:57:00	1	C. elegans	https://storage.googleapis.com/elegansvariation.org/photos/hawaii2017/C-2828.thumb.jpg	Leaf litter
No isotype	NA	C-2832	S-07381	Yes	Some (11-25)	20.039844	-155.441644	Big Island	Wild forest	Partially Obstructed	yes	3	F	2	20.5	69	80.8	22.6	671.333887	2017-08-17	14:58:00	NA	NA	https://storage.googleapis.com/elegansvariation.org/photos/hawaii2017/C-2832.thumb.jpg	Leaf litter
No isotype	NA	C-2832	S-07383	Yes	Some (11-25)	20.039844	-155.441644	Big Island	Wild forest	Partially Obstructed	yes	3	F	2	20.5	69	80.8	22.6	671.333887	2017-08-17	14:58:00	0	Unknown	https://storage.googleapis.com/elegansvariation.org/photos/hawaii2017/C-2832.thumb.jpg	Leaf litter
No isotype	NA	C-2832	S-07396	Yes	Some (11-25)	20.039844	-155.441644	Big Island	Wild forest	Partially Obstructed	yes	3	F	2	20.5	69	80.8	22.6	671.333887	2017-08-17	14:58:00	NA	NA	https://storage.googleapis.com/elegansvariation.org/photos/hawaii2017/C-2832.thumb.jpg	Leaf litter
No isotype	NA	C-2832	S-07397	Yes	Some (11-25)	20.039844	-155.441644	Big Island	Wild forest	Partially Obstructed	yes	3	F	2	20.5	69	80.8	22.6	671.333887	2017-08-17	14:58:00	0	Unknown	https://storage.googleapis.com/elegansvariation.org/photos/hawaii2017/C-2832.thumb.jpg	Leaf litter
No isotype	NA	C-2832	S-07400	Yes	Some (11-25)	20.039844	-155.441644	Big Island	Wild forest	Partially Obstructed	yes	3	F	2	20.5	69	80.8	22.6	671.333887	2017-08-17	14:58:00	1	Oscheius sp.	https://storage.googleapis.com/elegansvariation.org/photos/hawaii2017/C-2832.thumb.jpg	Leaf litter
ECA778	ECA763	C-2840	S-07355	Yes	Proliferating (25+)	20.039878	-155.441608	Big Island	Wild forest	Partially Obstructed	yes	3	C	3	20.7	70	82.7	22.6	670.6117647	2017-08-17	14:53:00	1	C. elegans	https://storage.googleapis.com/elegansvariation.org/photos/hawaii2017/C-2840.thumb.jpg	Leaf litter
ECA778	ECA764	C-2840	S-07357	Yes	Proliferating (25+)	20.039878	-155.441608	Big Island	Wild forest	Partially Obstructed	yes	3	C	3	20.7	70	82.7	22.6	670.6117647	2017-08-17	14:53:00	1	C. elegans	https://storage.googleapis.com/elegansvariation.org/photos/hawaii2017/C-2840.thumb.jpg	Leaf litter
ECA778	ECA765	C-2840	S-07358	Yes	Proliferating (25+)	20.039878	-155.441608	Big Island	Wild forest	Partially Obstructed	yes	3	C	3	20.7	70	82.7	22.6	670.6117647	2017-08-17	14:53:00	1	C. elegans	https://storage.googleapis.com/elegansvariation.org/photos/hawaii2017/C-2840.thumb.jpg	Leaf litter
ECA778	ECA766	C-2840	S-07359	Yes	Proliferating (25+)	20.039878	-155.441608	Big Island	Wild forest	Partially Obstructed	yes	3	C	3	20.7	70	82.7	22.6	670.6117647	2017-08-17	14:53:00	1	C. elegans	https://storage.googleapis.com/elegansvariation.org/photos/hawaii2017/C-2840.thumb.jpg	Leaf litter
ECA778	ECA767	C-2840	S-07365	Yes	Proliferating (25+)	20.039878	-155.441608	Big Island	Wild forest	Partially Obstructed	yes	3	C	3	20.7	70	82.7	22.6	670.6117647	2017-08-17	14:53:00	1	C. elegans	https://storage.googleapis.com/elegansvariation.org/photos/hawaii2017/C-2840.thumb.jpg	Leaf litter
No isotype	NA	C-2844	S-07426	Yes	Few (4-10)	20.039903	-155.441597	Big Island	Wild forest	Partially Obstructed	yes	3	C	2	20.9	69	85.2	22.6	670.3394495	2017-08-17	14:54:00	NA	NA	https://storage.googleapis.com/elegansvariation.org/photos/hawaii2017/C-2844.thumb.jpg	Leaf litter
No isotype	NA	C-2844	S-07427	Yes	Few (4-10)	20.039903	-155.441597	Big Island	Wild forest	Partially Obstructed	yes	3	C	2	20.9	69	85.2	22.6	670.3394495	2017-08-17	14:54:00	0	Unknown	https://storage.googleapis.com/elegansvariation.org/photos/hawaii2017/C-2844.thumb.jpg	Leaf litter
No isotype	NA	C-2844	S-07428	Yes	Few (4-10)	20.039903	-155.441597	Big Island	Wild forest	Partially Obstructed	yes	3	C	2	20.9	69	85.2	22.6	670.3394495	2017-08-17	14:54:00	NA	NA	https://storage.googleapis.com/elegansvariation.org/photos/hawaii2017/C-2844.thumb.jpg	Leaf litter
No isotype	NA	C-2844	S-07429	Yes	Few (4-10)	20.039903	-155.441597	Big Island	Wild forest	Partially Obstructed	yes	3	C	2	20.9	69	85.2	22.6	670.3394495	2017-08-17	14:54:00	0	Unknown	https://storage.googleapis.com/elegansvariation.org/photos/hawaii2017/C-2844.thumb.jpg	Leaf litter
No isotype	NA	C-2856	S-07345	Yes	Some (11-25)	20.039914	-155.441556	Big Island	Wild forest	Partially Obstructed	yes	3	A	2	21.9	69	87.6	21.9	669.971831	2017-08-17	14:51:00	0	Unknown	https://storage.googleapis.com/elegansvariation.org/photos/hawaii2017/C-2856.thumb.jpg	Leaf litter
No isotype	NA	C-2856	S-07356	Yes	Some (11-25)	20.039914	-155.441556	Big Island	Wild forest	Partially Obstructed	yes	3	A	2	21.9	69	87.6	21.9	669.971831	2017-08-17	14:51:00	0	Unknown	https://storage.googleapis.com/elegansvariation.org/photos/hawaii2017/C-2856.thumb.jpg	Leaf litter
No isotype	NA	C-2856	S-07363	Yes	Some (11-25)	20.039914	-155.441556	Big Island	Wild forest	Partially Obstructed	yes	3	A	2	21.9	69	87.6	21.9	669.971831	2017-08-17	14:51:00	NA	NA	https://storage.googleapis.com/elegansvariation.org/photos/hawaii2017/C-2856.thumb.jpg	Leaf litter
No isotype	NA	C-2856	S-07364	Yes	Some (11-25)	20.039914	-155.441556	Big Island	Wild forest	Partially Obstructed	yes	3	A	2	21.9	69	87.6	21.9	669.971831	2017-08-17	14:51:00	NA	NA	https://storage.googleapis.com/elegansvariation.org/photos/hawaii2017/C-2856.thumb.jpg	Leaf litter
ECA768	ECA768	C-2856	S-07368	Yes	Some (11-25)	20.039914	-155.441556	Big Island	Wild forest	Partially Obstructed	yes	3	A	2	21.9	69	87.6	21.9	669.971831	2017-08-17	14:51:00	1	C. elegans	https://storage.googleapis.com/elegansvariation.org/photos/hawaii2017/C-2856.thumb.jpg	Leaf litter
No isotype	NA	C-2860	NA	No	NA	20.039911	-155.441617	Big Island	Wild forest	Partially Obstructed	yes	3	B	3	21	NA	88.8	22.6	670.2622951	2017-08-17	14:52:00	NA	NA	https://storage.googleapis.com/elegansvariation.org/photos/hawaii2017/C-2860.thumb.jpg	Fruit
No isotype	NA	C-2864	NA	No	NA	19.423889	-155.222447	Big Island	Rural garden	Partially Obstructed	yes	1	F	1	14.2	71.5	94	18.5	1118.321244	2017-08-14	08:07:00	NA	NA	https://storage.googleapis.com/elegansvariation.org/photos/hawaii2017/C-2864.thumb.jpg	Leaf litter
No isotype	NA	C-2868	NA	Tracks	NA	19.423889	-155.222447	Big Island	Rural garden	Partially Obstructed	yes	1	F	2	15	71.5	94	18.5	1118.400369	2017-08-14	08:08:00	NA	NA	https://storage.googleapis.com/elegansvariation.org/photos/hawaii2017/C-2868.thumb.jpg	Leaf litter
No isotype	NA	C-2875	S-07261	Yes	Few (4-10)	20.039903	-155.441594	Big Island	Wild forest	Partially Obstructed	yes	3	D	1	21.1	69	83.8	22.6	670.1843318	2017-08-17	14:54:00	0	Unknown	https://storage.googleapis.com/elegansvariation.org/photos/hawaii2017/C-2875.thumb.jpg	Leaf litter
No isotype	NA	C-2875	S-07298	Yes	Few (4-10)	20.039903	-155.441594	Big Island	Wild forest	Partially Obstructed	yes	3	D	1	21.1	69	83.8	22.6	670.1843318	2017-08-17	14:54:00	NA	NA	https://storage.googleapis.com/elegansvariation.org/photos/hawaii2017/C-2875.thumb.jpg	Leaf litter
No isotype	NA	C-2875	S-07303	Yes	Few (4-10)	20.039903	-155.441594	Big Island	Wild forest	Partially Obstructed	yes	3	D	1	21.1	69	83.8	22.6	670.1843318	2017-08-17	14:54:00	NA	NA	https://storage.googleapis.com/elegansvariation.org/photos/hawaii2017/C-2875.thumb.jpg	Leaf litter
No isotype	NA	C-2875	S-07304	Yes	Few (4-10)	20.039903	-155.441594	Big Island	Wild forest	Partially Obstructed	yes	3	D	1	21.1	69	83.8	22.6	670.1843318	2017-08-17	14:54:00	0	Unknown	https://storage.googleapis.com/elegansvariation.org/photos/hawaii2017/C-2875.thumb.jpg	Leaf litter
No isotype	NA	C-2879	S-07380	Yes	Few (4-10)	20.039864	-155.441644	Big Island	Wild forest	Partially Obstructed	yes	3	E	3	20.5	67	84.2	22.6	671.08125	2017-08-17	14:55:00	0	Unknown	https://storage.googleapis.com/elegansvariation.org/photos/hawaii2017/C-2879.thumb.jpg	Leaf litter
ECA812	ECA771	C-2879	S-07384	Yes	Few (4-10)	20.039864	-155.441644	Big Island	Wild forest	Partially Obstructed	yes	3	E	3	20.5	67	84.2	22.6	671.08125	2017-08-17	14:55:00	1	C. elegans	https://storage.googleapis.com/elegansvariation.org/photos/hawaii2017/C-2879.thumb.jpg	Leaf litter
ECA812	ECA773	C-2879	S-07387	Yes	Few (4-10)	20.039864	-155.441644	Big Island	Wild forest	Partially Obstructed	yes	3	E	3	20.5	67	84.2	22.6	671.08125	2017-08-17	14:55:00	1	C. elegans	https://storage.googleapis.com/elegansvariation.org/photos/hawaii2017/C-2879.thumb.jpg	Leaf litter
No isotype	NA	C-2879	S-07390	Yes	Few (4-10)	20.039864	-155.441644	Big Island	Wild forest	Partially Obstructed	yes	3	E	3	20.5	67	84.2	22.6	671.08125	2017-08-17	14:55:00	NA	NA	https://storage.googleapis.com/elegansvariation.org/photos/hawaii2017/C-2879.thumb.jpg	Leaf litter
No isotype	NA	C-2961	NA	Tracks	NA	19.423858	-155.222486	Big Island	Rural garden	Partially Obstructed	yes	1	D	1	14.6	71.5	94	18.5	1120.500342	2017-08-14	08:03:00	NA	NA	https://storage.googleapis.com/elegansvariation.org/photos/hawaii2017/C-2961.thumb.jpg	Leaf litter
No isotype	NA	C-2962	S-06209	Yes	Very Few (1-3)	19.423861	-155.222475	Big Island	Rural garden	Partially Obstructed	yes	1	D	2	14.8	71.5	94	18.5	1120.374853	2017-08-14	08:03:00	0	Unknown	https://storage.googleapis.com/elegansvariation.org/photos/hawaii2017/C-2962.thumb.jpg	Leaf litter
No isotype	NA	C-2966	NA	Tracks	NA	19.423908	-155.222497	Big Island	Rural garden	Partially Obstructed	yes	1	E	2	14.9	71.5	94	18.5	1120.171429	2017-08-14	08:05:00	NA	NA	https://storage.googleapis.com/elegansvariation.org/photos/hawaii2017/C-2966.thumb.jpg	Leaf litter
No isotype	NA	C-2967	NA	Tracks	NA	19.4239	-155.222456	Big Island	Rural garden	Partially Obstructed	yes	1	E	1	15.2	71.5	94	18.5	1118.995935	2017-08-14	08:05:00	NA	NA	https://storage.googleapis.com/elegansvariation.org/photos/hawaii2017/C-2967.thumb.jpg	Leaf litter
No isotype	NA	C-3054	NA	Tracks	NA	19.423831	-155.222364	Big Island	Rural garden	Partially Obstructed	yes	1	B	2	15.2	71.5	94	18.5	1118.136201	2017-08-14	07:59:00	NA	NA	https://storage.googleapis.com/elegansvariation.org/photos/hawaii2017/C-3054.thumb.jpg	Leaf litter
No isotype	NA	C-3055	NA	No	NA	19.423853	-155.222453	Big Island	Rural garden	Partially Obstructed	yes	1	B	1	16.1	71.5	94	18.5	1116.554217	2017-08-14	07:59:00	NA	NA	https://storage.googleapis.com/elegansvariation.org/photos/hawaii2017/C-3055.thumb.jpg	Leaf litter
ECA730	ECA730	C-3058	S-06322	Yes	Very Few (1-3)	19.423869	-155.222483	Big Island	Rural garden	Partially Obstructed	yes	1	C	1	15	NA	94	18.4	1121.234234	2017-08-14	08:00:00	1	C. elegans	https://storage.googleapis.com/elegansvariation.org/photos/hawaii2017/C-3058.thumb.jpg	Leaf litter
No isotype	NA	C-3059	NA	Tracks	NA	19.423833	-155.222475	Big Island	Rural garden	Partially Obstructed	yes	1	C	2	15	71.5	94	18.5	1120.646552	2017-08-14	08:01:00	NA	NA	https://storage.googleapis.com/elegansvariation.org/photos/hawaii2017/C-3059.thumb.jpg	Leaf litter
ECA712	ECA711	C-3097	S-06054	Yes	Proliferating (25+)	19.423864	-155.222478	Big Island	Rural garden	Partially Obstructed	yes	1	A	1	15.4	71.5	94	18.5	1119.876923	2017-08-14	07:56:00	1	C. elegans	https://storage.googleapis.com/elegansvariation.org/photos/hawaii2017/C-3097.thumb.jpg	Leaf litter
ECA712	ECA712	C-3097	S-06058	Yes	Proliferating (25+)	19.423864	-155.222478	Big Island	Rural garden	Partially Obstructed	yes	1	A	1	15.4	71.5	94	18.5	1119.876923	2017-08-14	07:56:00	1	C. elegans	https://storage.googleapis.com/elegansvariation.org/photos/hawaii2017/C-3097.thumb.jpg	Leaf litter
ECA712	ECA713	C-3097	S-06059	Yes	Proliferating (25+)	19.423864	-155.222478	Big Island	Rural garden	Partially Obstructed	yes	1	A	1	15.4	71.5	94	18.5	1119.876923	2017-08-14	07:56:00	1	C. elegans	https://storage.googleapis.com/elegansvariation.org/photos/hawaii2017/C-3097.thumb.jpg	Leaf litter
ECA712	ECA714	C-3097	S-06073	Yes	Proliferating (25+)	19.423864	-155.222478	Big Island	Rural garden	Partially Obstructed	yes	1	A	1	15.4	71.5	94	18.5	1119.876923	2017-08-14	07:56:00	1	C. elegans	https://storage.googleapis.com/elegansvariation.org/photos/hawaii2017/C-3097.thumb.jpg	Leaf litter
ECA712	ECA715	C-3097	S-06076	Yes	Proliferating (25+)	19.423864	-155.222478	Big Island	Rural garden	Partially Obstructed	yes	1	A	1	15.4	71.5	94	18.5	1119.876923	2017-08-14	07:56:00	1	C. elegans	https://storage.googleapis.com/elegansvariation.org/photos/hawaii2017/C-3097.thumb.jpg	Leaf litter
No isotype	NA	C-3101	NA	Tracks	NA	19.423869	-155.222458	Big Island	Agricultural land	Partially Obstructed	yes	1	A	0	17.6	71.5	94	26.944444444444446	1118.421488	2017-08-14	07:53:00	NA	NA	https://storage.googleapis.com/elegansvariation.org/photos/hawaii2017/C-3101.thumb.jpg	Leaf litter
No isotype	NA	C-3105	NA	Tracks	NA	19.423853	-155.222481	Big Island	Rural garden	Partially Obstructed	yes	1	A	2	15.7	71.5	94	18.5	1119.423358	2017-08-14	07:58:00	NA	NA	https://storage.googleapis.com/elegansvariation.org/photos/hawaii2017/C-3105.thumb.jpg	Leaf litter
No isotype	NA	C-3122	S-07224	Yes	Few (4-10)	20.038614	-155.439544	Big Island	Wild forest	Partially Obstructed	yes	3	A	3	22.5	69	87.1	21.9	660.1563981	2017-08-17	14:50:00	NA	NA	https://storage.googleapis.com/elegansvariation.org/photos/hawaii2017/C-3122.thumb.jpg	Leaf litter
No isotype	NA	C-3122	S-07227	Yes	Few (4-10)	20.038614	-155.439544	Big Island	Wild forest	Partially Obstructed	yes	3	A	3	22.5	69	87.1	21.9	660.1563981	2017-08-17	14:50:00	0	Unknown	https://storage.googleapis.com/elegansvariation.org/photos/hawaii2017/C-3122.thumb.jpg	Leaf litter
No isotype	NA	C-3122	S-07334	Yes	Few (4-10)	20.038614	-155.439544	Big Island	Wild forest	Partially Obstructed	yes	3	A	3	22.5	69	87.1	21.9	660.1563981	2017-08-17	14:50:00	0	Unknown	https://storage.googleapis.com/elegansvariation.org/photos/hawaii2017/C-3122.thumb.jpg	Leaf litter
No isotype	NA	C-3122	S-07335	Yes	Few (4-10)	20.038614	-155.439544	Big Island	Wild forest	Partially Obstructed	yes	3	A	3	22.5	69	87.1	21.9	660.1563981	2017-08-17	14:50:00	0	Unknown	https://storage.googleapis.com/elegansvariation.org/photos/hawaii2017/C-3122.thumb.jpg	Leaf litter
No isotype	NA	C-3139	NA	Tracks	NA	20.039906	-155.441503	Big Island	Wild forest	Partially Obstructed	yes	3	B	1	19.9	NA	83.8	22.6	653.6134969	2017-08-17	14:51:00	NA	NA	https://storage.googleapis.com/elegansvariation.org/photos/hawaii2017/C-3139.thumb.jpg	Fruit
ECA812	ECA812	C-3143	S-07541	Yes	Some (11-25)	20.039917	-155.441542	Big Island	Wild forest	Partially Obstructed	yes	3	D	2	19.8	68.5	80.9	22.6	655.4961832	2017-08-17	14:55:00	1	C. elegans	https://storage.googleapis.com/elegansvariation.org/photos/hawaii2017/C-3143.thumb.jpg	Leaf litter
No isotype	NA	C-3143	S-07635	Yes	Some (11-25)	20.039917	-155.441542	Big Island	Wild forest	Partially Obstructed	yes	3	D	2	19.8	68.5	80.9	22.6	655.4961832	2017-08-17	14:55:00	0	Unknown	https://storage.googleapis.com/elegansvariation.org/photos/hawaii2017/C-3143.thumb.jpg	Leaf litter
No isotype	NA	C-3143	S-07637	Yes	Some (11-25)	20.039917	-155.441542	Big Island	Wild forest	Partially Obstructed	yes	3	D	2	19.8	68.5	80.9	22.6	655.4961832	2017-08-17	14:55:00	0	Unknown	https://storage.googleapis.com/elegansvariation.org/photos/hawaii2017/C-3143.thumb.jpg	Leaf litter
ECA812	ECA813	C-3143	S-07638	Yes	Some (11-25)	20.039917	-155.441542	Big Island	Wild forest	Partially Obstructed	yes	3	D	2	19.8	68.5	80.9	22.6	655.4961832	2017-08-17	14:55:00	1	C. elegans	https://storage.googleapis.com/elegansvariation.org/photos/hawaii2017/C-3143.thumb.jpg	Leaf litter
No isotype	NA	C-3143	S-07639	Yes	Some (11-25)	20.039917	-155.441542	Big Island	Wild forest	Partially Obstructed	yes	3	D	2	19.8	68.5	80.9	22.6	655.4961832	2017-08-17	14:55:00	NA	NA	https://storage.googleapis.com/elegansvariation.org/photos/hawaii2017/C-3143.thumb.jpg	Leaf litter
No isotype	NA	C-3147	S-07262	Yes	Few (4-10)	20.039908	-155.441533	Big Island	Wild forest	Partially Obstructed	yes	3	D	3	18.5	69	79.9	23.3	654.7903226	2017-08-17	14:56:00	0	Unknown	https://storage.googleapis.com/elegansvariation.org/photos/hawaii2017/C-3147.thumb.jpg	Leaf litter
No isotype	NA	C-3147	S-07263	Yes	Few (4-10)	20.039908	-155.441533	Big Island	Wild forest	Partially Obstructed	yes	3	D	3	18.5	69	79.9	23.3	654.7903226	2017-08-17	14:56:00	NA	NA	https://storage.googleapis.com/elegansvariation.org/photos/hawaii2017/C-3147.thumb.jpg	Leaf litter
No isotype	NA	C-3147	S-07317	Yes	Few (4-10)	20.039908	-155.441533	Big Island	Wild forest	Partially Obstructed	yes	3	D	3	18.5	69	79.9	23.3	654.7903226	2017-08-17	14:56:00	0	Unknown	https://storage.googleapis.com/elegansvariation.org/photos/hawaii2017/C-3147.thumb.jpg	Leaf litter
No isotype	NA	C-3147	S-07318	Yes	Few (4-10)	20.039908	-155.441533	Big Island	Wild forest	Partially Obstructed	yes	3	D	3	18.5	69	79.9	23.3	654.7903226	2017-08-17	14:56:00	NA	NA	https://storage.googleapis.com/elegansvariation.org/photos/hawaii2017/C-3147.thumb.jpg	Leaf litter
No isotype	NA	C-3151	S-07529	Yes	Few (4-10)	20.039897	-155.441531	Big Island	Wild forest	Partially Obstructed	yes	3	C	1	19.8	67.5	81.9	22.6	656.5362319	2017-08-17	14:54:00	0	Unknown	https://storage.googleapis.com/elegansvariation.org/photos/hawaii2017/C-3151.thumb.jpg	Leaf litter
ECA778	ECA810	C-3151	S-07530	Yes	Few (4-10)	20.039897	-155.441531	Big Island	Wild forest	Partially Obstructed	yes	3	C	1	19.8	67.5	81.9	22.6	656.5362319	2017-08-17	14:54:00	1	C. elegans	https://storage.googleapis.com/elegansvariation.org/photos/hawaii2017/C-3151.thumb.jpg	Leaf litter
ECA778	ECA811	C-3151	S-07534	Yes	Few (4-10)	20.039897	-155.441531	Big Island	Wild forest	Partially Obstructed	yes	3	C	1	19.8	67.5	81.9	22.6	656.5362319	2017-08-17	14:54:00	1	C. elegans	https://storage.googleapis.com/elegansvariation.org/photos/hawaii2017/C-3151.thumb.jpg	Leaf litter
No isotype	NA	C-3151	S-07535	Yes	Few (4-10)	20.039897	-155.441531	Big Island	Wild forest	Partially Obstructed	yes	3	C	1	19.8	67.5	81.9	22.6	656.5362319	2017-08-17	14:54:00	0	Unknown	https://storage.googleapis.com/elegansvariation.org/photos/hawaii2017/C-3151.thumb.jpg	Leaf litter
ECA768	ECA772	C-3155	S-07385	Yes	Some (11-25)	20.039908	-155.441503	Big Island	Wild forest	Partially Obstructed	yes	3	B	2	21.5	NA	NA	NA	655.4036697	2017-08-17	14:53:00	1	C. elegans	https://storage.googleapis.com/elegansvariation.org/photos/hawaii2017/C-3155.thumb.jpg	Fruit
No isotype	NA	C-3155	S-07386	Yes	Some (11-25)	20.039908	-155.441503	Big Island	Wild forest	Partially Obstructed	yes	3	B	2	21.5	NA	NA	NA	655.4036697	2017-08-17	14:53:00	NA	NA	https://storage.googleapis.com/elegansvariation.org/photos/hawaii2017/C-3155.thumb.jpg	Fruit
ECA777	ECA777	C-3155	S-07414	Yes	Some (11-25)	20.039908	-155.441503	Big Island	Wild forest	Partially Obstructed	yes	3	B	2	21.5	NA	NA	NA	655.4036697	2017-08-17	14:53:00	1	C. elegans	https://storage.googleapis.com/elegansvariation.org/photos/hawaii2017/C-3155.thumb.jpg	Fruit
ECA778	ECA778	C-3155	S-07415	Yes	Some (11-25)	20.039908	-155.441503	Big Island	Wild forest	Partially Obstructed	yes	3	B	2	21.5	NA	NA	NA	655.4036697	2017-08-17	14:53:00	1	C. elegans	https://storage.googleapis.com/elegansvariation.org/photos/hawaii2017/C-3155.thumb.jpg	Fruit
No isotype	NA	C-3155	S-07416	Yes	Some (11-25)	20.039908	-155.441503	Big Island	Wild forest	Partially Obstructed	yes	3	B	2	21.5	NA	NA	NA	655.4036697	2017-08-17	14:53:00	0	Unknown	https://storage.googleapis.com/elegansvariation.org/photos/hawaii2017/C-3155.thumb.jpg	Fruit
No isotype	NA	C-3189	S-07264	Yes	Some (11-25)	20.039869	-155.441464	Big Island	Wild forest	Partially Obstructed	yes	3	A	1	21.6	68.5	85.7	21.9	653.640118	2017-08-17	14:50:00	0	Unknown	https://storage.googleapis.com/elegansvariation.org/photos/hawaii2017/C-3189.thumb.jpg	Leaf litter
ECA760	ECA754	C-3189	S-07266	Yes	Some (11-25)	20.039869	-155.441464	Big Island	Wild forest	Partially Obstructed	yes	3	A	1	21.6	68.5	85.7	21.9	653.640118	2017-08-17	14:50:00	1	C. elegans	https://storage.googleapis.com/elegansvariation.org/photos/hawaii2017/C-3189.thumb.jpg	Leaf litter
ECA812	ECA755	C-3189	S-07267	Yes	Some (11-25)	20.039869	-155.441464	Big Island	Wild forest	Partially Obstructed	yes	3	A	1	21.6	68.5	85.7	21.9	653.640118	2017-08-17	14:50:00	1	C. elegans	https://storage.googleapis.com/elegansvariation.org/photos/hawaii2017/C-3189.thumb.jpg	Leaf litter
No isotype	NA	C-3189	S-07319	Yes	Some (11-25)	20.039869	-155.441464	Big Island	Wild forest	Partially Obstructed	yes	3	A	1	21.6	68.5	85.7	21.9	653.640118	2017-08-17	14:50:00	0	Unknown	https://storage.googleapis.com/elegansvariation.org/photos/hawaii2017/C-3189.thumb.jpg	Leaf litter
No isotype	NA	C-3193	S-07337	Yes	Few (4-10)	20.039886	-155.441525	Big Island	Wild forest	Partially Obstructed	yes	3	E	1	19.5	64.5	76.6	24	651.7148289	2017-08-17	14:56:00	NA	NA	https://storage.googleapis.com/elegansvariation.org/photos/hawaii2017/C-3193.thumb.jpg	Leaf litter
No isotype	NA	C-3193	S-07338	Yes	Few (4-10)	20.039886	-155.441525	Big Island	Wild forest	Partially Obstructed	yes	3	E	1	19.5	64.5	76.6	24	651.7148289	2017-08-17	14:56:00	0	Unknown	https://storage.googleapis.com/elegansvariation.org/photos/hawaii2017/C-3193.thumb.jpg	Leaf litter
No isotype	NA	C-3193	S-07370	Yes	Few (4-10)	20.039886	-155.441525	Big Island	Wild forest	Partially Obstructed	yes	3	E	1	19.5	64.5	76.6	24	651.7148289	2017-08-17	14:56:00	0	Unknown	https://storage.googleapis.com/elegansvariation.org/photos/hawaii2017/C-3193.thumb.jpg	Leaf litter
No isotype	NA	C-3193	S-07371	Yes	Few (4-10)	20.039886	-155.441525	Big Island	Wild forest	Partially Obstructed	yes	3	E	1	19.5	64.5	76.6	24	651.7148289	2017-08-17	14:56:00	0	Unknown	https://storage.googleapis.com/elegansvariation.org/photos/hawaii2017/C-3193.thumb.jpg	Leaf litter
No isotype	NA	C-3197	S-07252	Yes	Some (11-25)	20.039886	-155.441531	Big Island	Wild forest	Partially Obstructed	yes	3	F	1	19.4	NA	76.5	23.3	651.980315	2017-08-17	14:57:00	NA	NA	https://storage.googleapis.com/elegansvariation.org/photos/hawaii2017/C-3197.thumb.jpg	Fruit
No isotype	NA	C-3197	S-07300	Yes	Some (11-25)	20.039886	-155.441531	Big Island	Wild forest	Partially Obstructed	yes	3	F	1	19.4	NA	76.5	23.3	651.980315	2017-08-17	14:57:00	0	Unknown	https://storage.googleapis.com/elegansvariation.org/photos/hawaii2017/C-3197.thumb.jpg	Fruit
ECA760	ECA758	C-3197	S-07305	Yes	Some (11-25)	20.039886	-155.441531	Big Island	Wild forest	Partially Obstructed	yes	3	F	1	19.4	NA	76.5	23.3	651.980315	2017-08-17	14:57:00	1	C. elegans	https://storage.googleapis.com/elegansvariation.org/photos/hawaii2017/C-3197.thumb.jpg	Fruit
ECA812	ECA759	C-3197	S-07306	Yes	Some (11-25)	20.039886	-155.441531	Big Island	Wild forest	Partially Obstructed	yes	3	F	1	19.4	NA	76.5	23.3	651.980315	2017-08-17	14:57:00	1	C. elegans	https://storage.googleapis.com/elegansvariation.org/photos/hawaii2017/C-3197.thumb.jpg	Fruit
No isotype	NA	C-3197	S-07309	Yes	Some (11-25)	20.039886	-155.441531	Big Island	Wild forest	Partially Obstructed	yes	3	F	1	19.4	NA	76.5	23.3	651.980315	2017-08-17	14:57:00	0	Unknown	https://storage.googleapis.com/elegansvariation.org/photos/hawaii2017/C-3197.thumb.jpg	Fruit
No isotype	NA	C-3201	S-07377	Yes	Proliferating (25+)	20.039869	-155.441531	Big Island	Wild forest	Partially Obstructed	yes	3	A	0	19.4	NA	78.2	24	649.3469388	2017-08-17	14:58:00	0	Unknown	https://storage.googleapis.com/elegansvariation.org/photos/hawaii2017/C-3201.thumb.jpg	Fruit
ECA807	ECA770	C-3201	S-07378	Yes	Proliferating (25+)	20.039869	-155.441531	Big Island	Wild forest	Partially Obstructed	yes	3	A	0	19.4	NA	78.2	24	649.3469388	2017-08-17	14:58:00	1	C. elegans	https://storage.googleapis.com/elegansvariation.org/photos/hawaii2017/C-3201.thumb.jpg	Fruit
ECA812	ECA774	C-3201	S-07388	Yes	Proliferating (25+)	20.039869	-155.441531	Big Island	Wild forest	Partially Obstructed	yes	3	A	0	19.4	NA	78.2	24	649.3469388	2017-08-17	14:58:00	1	C. elegans	https://storage.googleapis.com/elegansvariation.org/photos/hawaii2017/C-3201.thumb.jpg	Fruit
No isotype	NA	C-3201	S-07389	Yes	Proliferating (25+)	20.039869	-155.441531	Big Island	Wild forest	Partially Obstructed	yes	3	A	0	19.4	NA	78.2	24	649.3469388	2017-08-17	14:58:00	0	Unknown	https://storage.googleapis.com/elegansvariation.org/photos/hawaii2017/C-3201.thumb.jpg	Fruit
ECA812	ECA775	C-3201	S-07391	Yes	Proliferating (25+)	20.039869	-155.441531	Big Island	Wild forest	Partially Obstructed	yes	3	A	0	19.4	NA	78.2	24	649.3469388	2017-08-17	14:58:00	1	C. elegans	https://storage.googleapis.com/elegansvariation.org/photos/hawaii2017/C-3201.thumb.jpg	Fruit
ECA812	ECA776	C-3201	S-07392	Yes	Proliferating (25+)	20.039869	-155.441531	Big Island	Wild forest	Partially Obstructed	yes	3	A	0	19.4	NA	78.2	24	649.3469388	2017-08-17	14:58:00	1	C. elegans	https://storage.googleapis.com/elegansvariation.org/photos/hawaii2017/C-3201.thumb.jpg	Fruit
ECA807	ECA807	C-3201	S-07395	Yes	Proliferating (25+)	20.039869	-155.441531	Big Island	Wild forest	Partially Obstructed	yes	3	A	0	19.4	NA	78.2	24	649.3469388	2017-08-17	14:58:00	1	C. elegans	https://storage.googleapis.com/elegansvariation.org/photos/hawaii2017/C-3201.thumb.jpg	Fruit
