# Supplementary material for: Deep sampling of Hawaiian Caenorhabditis elegans reveals high genetic diversity and admixture with global populations
Source: eLife journal article supplement (doi:10.7554/elife.50465), 2019-12-03
Supplement: supp [file elife-50465-supp-v1.zip › elife_poa_e50465_Figure_3_figure_supplement_3_source_data_2.csv]

isotype	strain	c_label	s_label	worms_on_sample	approximate_number_of_worms	latitude	longitude	island	landscape	sky_view	gridsect	gridsect_number	gridsect_direction	gridsect_radius	substrate_temperature	substrate_moisture	ambient_humidity	ambient_temperature	altitude	date	time	pcr_positive	species_id	photo_url_thumb	fixed_substrate
ECA760	ECA779	C-2824	S-07420	Yes	Few (4-10)	20.039858	-155.441608	Big Island	Wild forest	Partially Obstructed	yes	3	E	2	20.6	NA	83.1	22.6	670.8930041	2017-08-17	14:56:00	1	C. elegans	https://storage.googleapis.com/elegansvariation.org/photos/hawaii2017/C-2824.thumb.jpg	Fruit
ECA760	ECA780	C-2824	S-07421	Yes	Few (4-10)	20.039858	-155.441608	Big Island	Wild forest	Partially Obstructed	yes	3	E	2	20.6	NA	83.1	22.6	670.8930041	2017-08-17	14:56:00	1	C. elegans	https://storage.googleapis.com/elegansvariation.org/photos/hawaii2017/C-2824.thumb.jpg	Fruit
ECA760	ECA808	C-2824	S-07422	Yes	Few (4-10)	20.039858	-155.441608	Big Island	Wild forest	Partially Obstructed	yes	3	E	2	20.6	NA	83.1	22.6	670.8930041	2017-08-17	14:56:00	1	C. elegans	https://storage.googleapis.com/elegansvariation.org/photos/hawaii2017/C-2824.thumb.jpg	Fruit
ECA778	ECA781	C-2824	S-07423	Yes	Few (4-10)	20.039858	-155.441608	Big Island	Wild forest	Partially Obstructed	yes	3	E	2	20.6	NA	83.1	22.6	670.8930041	2017-08-17	14:56:00	1	C. elegans	https://storage.googleapis.com/elegansvariation.org/photos/hawaii2017/C-2824.thumb.jpg	Fruit
ECA778	ECA756	C-2830	S-07273	Yes	Proliferating (25+)	20.039822	-155.441533	Big Island	Wild forest	Partially Obstructed	no	NA	NA	NA	20.2	NA	81.3	22.6	670.543379	2017-08-17	15:01:00	1	C. elegans	https://storage.googleapis.com/elegansvariation.org/photos/hawaii2017/C-2830.thumb.jpg	Fruit
ECA778	ECA757	C-2830	S-07274	Yes	Proliferating (25+)	20.039822	-155.441533	Big Island	Wild forest	Partially Obstructed	no	NA	NA	NA	20.2	NA	81.3	22.6	670.543379	2017-08-17	15:01:00	1	C. elegans	https://storage.googleapis.com/elegansvariation.org/photos/hawaii2017/C-2830.thumb.jpg	Fruit
ECA812	ECA762	C-2830	S-07329	Yes	Proliferating (25+)	20.039822	-155.441533	Big Island	Wild forest	Partially Obstructed	no	NA	NA	NA	20.2	NA	81.3	22.6	670.543379	2017-08-17	15:01:00	1	C. elegans	https://storage.googleapis.com/elegansvariation.org/photos/hawaii2017/C-2830.thumb.jpg	Fruit
ECA760	ECA749	C-2836	S-07228	Yes	Few (4-10)	20.039875	-155.441608	Big Island	Wild forest	Partially Obstructed	no	NA	NA	NA	20.1	NA	80.5	22.6	670.7331461	2017-08-17	14:59:00	1	C. elegans	https://storage.googleapis.com/elegansvariation.org/photos/hawaii2017/C-2836.thumb.jpg	Flower
ECA812	ECA782	C-2836	S-07425	Yes	Few (4-10)	20.039875	-155.441608	Big Island	Wild forest	Partially Obstructed	no	NA	NA	NA	20.1	NA	80.5	22.6	670.7331461	2017-08-17	14:59:00	1	C. elegans	https://storage.googleapis.com/elegansvariation.org/photos/hawaii2017/C-2836.thumb.jpg	Flower
ECA812	ECA786	C-2836	S-07436	Yes	Few (4-10)	20.039875	-155.441608	Big Island	Wild forest	Partially Obstructed	no	NA	NA	NA	20.1	NA	80.5	22.6	670.7331461	2017-08-17	14:59:00	1	C. elegans	https://storage.googleapis.com/elegansvariation.org/photos/hawaii2017/C-2836.thumb.jpg	Flower
ECA812	ECA748	C-2880	S-07225	Yes	Proliferating (25+)	20.039847	-155.441492	Big Island	Wild forest	Partially Obstructed	no	NA	NA	NA	20.1	NA	81.8	22.6	669.9975	2017-08-17	15:00:00	1	C. elegans	https://storage.googleapis.com/elegansvariation.org/photos/hawaii2017/C-2880.thumb.jpg	Fruit
ECA812	ECA750	C-2880	S-07237	Yes	Proliferating (25+)	20.039847	-155.441492	Big Island	Wild forest	Partially Obstructed	no	NA	NA	NA	20.1	NA	81.8	22.6	669.9975	2017-08-17	15:00:00	1	C. elegans	https://storage.googleapis.com/elegansvariation.org/photos/hawaii2017/C-2880.thumb.jpg	Fruit
ECA812	ECA751	C-2880	S-07239	Yes	Proliferating (25+)	20.039847	-155.441492	Big Island	Wild forest	Partially Obstructed	no	NA	NA	NA	20.1	NA	81.8	22.6	669.9975	2017-08-17	15:00:00	1	C. elegans	https://storage.googleapis.com/elegansvariation.org/photos/hawaii2017/C-2880.thumb.jpg	Fruit
ECA760	ECA752	C-2880	S-07243	Yes	Proliferating (25+)	20.039847	-155.441492	Big Island	Wild forest	Partially Obstructed	no	NA	NA	NA	20.1	NA	81.8	22.6	669.9975	2017-08-17	15:00:00	1	C. elegans	https://storage.googleapis.com/elegansvariation.org/photos/hawaii2017/C-2880.thumb.jpg	Fruit
ECA760	ECA753	C-2880	S-07244	Yes	Proliferating (25+)	20.039847	-155.441492	Big Island	Wild forest	Partially Obstructed	no	NA	NA	NA	20.1	NA	81.8	22.6	669.9975	2017-08-17	15:00:00	1	C. elegans	https://storage.googleapis.com/elegansvariation.org/photos/hawaii2017/C-2880.thumb.jpg	Fruit
ECA812	ECA761	C-2880	S-07323	Yes	Proliferating (25+)	20.039847	-155.441492	Big Island	Wild forest	Partially Obstructed	no	NA	NA	NA	20.1	NA	81.8	22.6	669.9975	2017-08-17	15:00:00	1	C. elegans	https://storage.googleapis.com/elegansvariation.org/photos/hawaii2017/C-2880.thumb.jpg	Fruit
ECA812	ECA719	C-3114	S-06174	Yes	Few (4-10)	20.039858	-155.441419	Big Island	Wild forest	Partially Obstructed	no	NA	NA	NA	19.6	NA	81.1	22.6	655.1933333	2017-08-13	09:21:00	1	C. elegans	https://storage.googleapis.com/elegansvariation.org/photos/hawaii2017/C-3114.thumb.jpg	Fruit
ECA807	ECA720	C-3114	S-06175	Yes	Few (4-10)	20.039858	-155.441419	Big Island	Wild forest	Partially Obstructed	no	NA	NA	NA	19.6	NA	81.1	22.6	655.1933333	2017-08-13	09:21:00	1	C. elegans	https://storage.googleapis.com/elegansvariation.org/photos/hawaii2017/C-3114.thumb.jpg	Fruit
ECA778	ECA721	C-3114	S-06176	Yes	Few (4-10)	20.039858	-155.441419	Big Island	Wild forest	Partially Obstructed	no	NA	NA	NA	19.6	NA	81.1	22.6	655.1933333	2017-08-13	09:21:00	1	C. elegans	https://storage.googleapis.com/elegansvariation.org/photos/hawaii2017/C-3114.thumb.jpg	Fruit
ECA703	ECA703	C-3133	S-05962	Yes	Few (4-10)	20.038831	-155.438922	Big Island	Wild forest	Partially Obstructed	no	NA	NA	NA	18.7	65	75	23.3	649.9944751	2017-08-13	08:44:00	1	C. elegans	https://storage.googleapis.com/elegansvariation.org/photos/hawaii2017/C-3133.thumb.jpg	Leaf litter
ECA705	ECA705	C-3133	S-05984	Yes	Few (4-10)	20.038831	-155.438922	Big Island	Wild forest	Partially Obstructed	no	NA	NA	NA	18.7	65	75	23.3	649.9944751	2017-08-13	08:44:00	1	C. elegans	https://storage.googleapis.com/elegansvariation.org/photos/hawaii2017/C-3133.thumb.jpg	Leaf litter
ECA706	ECA706	C-3133	S-05986	Yes	Few (4-10)	20.038831	-155.438922	Big Island	Wild forest	Partially Obstructed	no	NA	NA	NA	18.7	65	75	23.3	649.9944751	2017-08-13	08:44:00	1	C. elegans	https://storage.googleapis.com/elegansvariation.org/photos/hawaii2017/C-3133.thumb.jpg	Leaf litter
ECA705	ECA822	C-3133	S-05987	Yes	Few (4-10)	20.038831	-155.438922	Big Island	Wild forest	Partially Obstructed	no	NA	NA	NA	18.7	65	75	23.3	649.9944751	2017-08-13	08:44:00	1	C. elegans	https://storage.googleapis.com/elegansvariation.org/photos/hawaii2017/C-3133.thumb.jpg	Leaf litter
ECA768	ECA772	C-3155	S-07385	Yes	Some (11-25)	20.039908	-155.441503	Big Island	Wild forest	Partially Obstructed	yes	3	B	2	21.5	NA	NA	NA	655.4036697	2017-08-17	14:53:00	1	C. elegans	https://storage.googleapis.com/elegansvariation.org/photos/hawaii2017/C-3155.thumb.jpg	Fruit
ECA777	ECA777	C-3155	S-07414	Yes	Some (11-25)	20.039908	-155.441503	Big Island	Wild forest	Partially Obstructed	yes	3	B	2	21.5	NA	NA	NA	655.4036697	2017-08-17	14:53:00	1	C. elegans	https://storage.googleapis.com/elegansvariation.org/photos/hawaii2017/C-3155.thumb.jpg	Fruit
ECA778	ECA778	C-3155	S-07415	Yes	Some (11-25)	20.039908	-155.441503	Big Island	Wild forest	Partially Obstructed	yes	3	B	2	21.5	NA	NA	NA	655.4036697	2017-08-17	14:53:00	1	C. elegans	https://storage.googleapis.com/elegansvariation.org/photos/hawaii2017/C-3155.thumb.jpg	Fruit
ECA812	ECA704	C-3164	S-05967	Yes	Some (11-25)	20.039783	-155.441517	Big Island	Wild forest	Partially Obstructed	no	NA	NA	NA	21.2	NA	75.9	23.3	667.7007299	2017-08-13	09:24:00	1	C. elegans	https://storage.googleapis.com/elegansvariation.org/photos/hawaii2017/C-3164.thumb.jpg	Fruit
ECA778	ECA707	C-3164	S-06003	Yes	Some (11-25)	20.039783	-155.441517	Big Island	Wild forest	Partially Obstructed	no	NA	NA	NA	21.2	NA	75.9	23.3	667.7007299	2017-08-13	09:24:00	1	C. elegans	https://storage.googleapis.com/elegansvariation.org/photos/hawaii2017/C-3164.thumb.jpg	Fruit
ECA778	ECA708	C-3164	S-06025	Yes	Some (11-25)	20.039783	-155.441517	Big Island	Wild forest	Partially Obstructed	no	NA	NA	NA	21.2	NA	75.9	23.3	667.7007299	2017-08-13	09:24:00	1	C. elegans	https://storage.googleapis.com/elegansvariation.org/photos/hawaii2017/C-3164.thumb.jpg	Fruit
ECA778	ECA709	C-3164	S-06026	Yes	Some (11-25)	20.039783	-155.441517	Big Island	Wild forest	Partially Obstructed	no	NA	NA	NA	21.2	NA	75.9	23.3	667.7007299	2017-08-13	09:24:00	1	C. elegans	https://storage.googleapis.com/elegansvariation.org/photos/hawaii2017/C-3164.thumb.jpg	Fruit
ECA760	ECA754	C-3189	S-07266	Yes	Some (11-25)	20.039869	-155.441464	Big Island	Wild forest	Partially Obstructed	yes	3	A	1	21.6	68.5	85.7	21.9	653.640118	2017-08-17	14:50:00	1	C. elegans	https://storage.googleapis.com/elegansvariation.org/photos/hawaii2017/C-3189.thumb.jpg	Leaf litter
ECA812	ECA755	C-3189	S-07267	Yes	Some (11-25)	20.039869	-155.441464	Big Island	Wild forest	Partially Obstructed	yes	3	A	1	21.6	68.5	85.7	21.9	653.640118	2017-08-17	14:50:00	1	C. elegans	https://storage.googleapis.com/elegansvariation.org/photos/hawaii2017/C-3189.thumb.jpg	Leaf litter
ECA760	ECA758	C-3197	S-07305	Yes	Some (11-25)	20.039886	-155.441531	Big Island	Wild forest	Partially Obstructed	yes	3	F	1	19.4	NA	76.5	23.3	651.980315	2017-08-17	14:57:00	1	C. elegans	https://storage.googleapis.com/elegansvariation.org/photos/hawaii2017/C-3197.thumb.jpg	Fruit
ECA812	ECA759	C-3197	S-07306	Yes	Some (11-25)	20.039886	-155.441531	Big Island	Wild forest	Partially Obstructed	yes	3	F	1	19.4	NA	76.5	23.3	651.980315	2017-08-17	14:57:00	1	C. elegans	https://storage.googleapis.com/elegansvariation.org/photos/hawaii2017/C-3197.thumb.jpg	Fruit
ECA807	ECA770	C-3201	S-07378	Yes	Proliferating (25+)	20.039869	-155.441531	Big Island	Wild forest	Partially Obstructed	yes	3	A	0	19.4	NA	78.2	24	649.3469388	2017-08-17	14:58:00	1	C. elegans	https://storage.googleapis.com/elegansvariation.org/photos/hawaii2017/C-3201.thumb.jpg	Fruit
ECA812	ECA774	C-3201	S-07388	Yes	Proliferating (25+)	20.039869	-155.441531	Big Island	Wild forest	Partially Obstructed	yes	3	A	0	19.4	NA	78.2	24	649.3469388	2017-08-17	14:58:00	1	C. elegans	https://storage.googleapis.com/elegansvariation.org/photos/hawaii2017/C-3201.thumb.jpg	Fruit
ECA812	ECA775	C-3201	S-07391	Yes	Proliferating (25+)	20.039869	-155.441531	Big Island	Wild forest	Partially Obstructed	yes	3	A	0	19.4	NA	78.2	24	649.3469388	2017-08-17	14:58:00	1	C. elegans	https://storage.googleapis.com/elegansvariation.org/photos/hawaii2017/C-3201.thumb.jpg	Fruit
ECA812	ECA776	C-3201	S-07392	Yes	Proliferating (25+)	20.039869	-155.441531	Big Island	Wild forest	Partially Obstructed	yes	3	A	0	19.4	NA	78.2	24	649.3469388	2017-08-17	14:58:00	1	C. elegans	https://storage.googleapis.com/elegansvariation.org/photos/hawaii2017/C-3201.thumb.jpg	Fruit
ECA807	ECA807	C-3201	S-07395	Yes	Proliferating (25+)	20.039869	-155.441531	Big Island	Wild forest	Partially Obstructed	yes	3	A	0	19.4	NA	78.2	24	649.3469388	2017-08-17	14:58:00	1	C. elegans	https://storage.googleapis.com/elegansvariation.org/photos/hawaii2017/C-3201.thumb.jpg	Fruit
ECA812	ECA809	C-3205	S-07424	Yes	Few (4-10)	20.039783	-155.441481	Big Island	Wild forest	Partially Obstructed	no	NA	NA	NA	19	NA	77.9	23.3	648.3991416	2017-08-17	15:00:00	1	C. elegans	https://storage.googleapis.com/elegansvariation.org/photos/hawaii2017/C-3205.thumb.jpg	Fruit
ECA812	ECA783	C-3205	S-07430	Yes	Few (4-10)	20.039783	-155.441481	Big Island	Wild forest	Partially Obstructed	no	NA	NA	NA	19	NA	77.9	23.3	648.3991416	2017-08-17	15:00:00	1	C. elegans	https://storage.googleapis.com/elegansvariation.org/photos/hawaii2017/C-3205.thumb.jpg	Fruit
ECA760	ECA784	C-3205	S-07431	Yes	Few (4-10)	20.039783	-155.441481	Big Island	Wild forest	Partially Obstructed	no	NA	NA	NA	19	NA	77.9	23.3	648.3991416	2017-08-17	15:00:00	1	C. elegans	https://storage.googleapis.com/elegansvariation.org/photos/hawaii2017/C-3205.thumb.jpg	Fruit
ECA760	ECA785	C-3205	S-07432	Yes	Few (4-10)	20.039783	-155.441481	Big Island	Wild forest	Partially Obstructed	no	NA	NA	NA	19	NA	77.9	23.3	648.3991416	2017-08-17	15:00:00	1	C. elegans	https://storage.googleapis.com/elegansvariation.org/photos/hawaii2017/C-3205.thumb.jpg	Fruit
ECA812	ECA787	C-3205	S-07460	Yes	Few (4-10)	20.039783	-155.441481	Big Island	Wild forest	Partially Obstructed	no	NA	NA	NA	19	NA	77.9	23.3	648.3991416	2017-08-17	15:00:00	1	C. elegans	https://storage.googleapis.com/elegansvariation.org/photos/hawaii2017/C-3205.thumb.jpg	Fruit
