# Supplementary material for: Deep sampling of Hawaiian Caenorhabditis elegans reveals high genetic diversity and admixture with global populations
Source: eLife journal article supplement (doi:10.7554/elife.50465), 2019-12-03
Supplement: supp [file elife-50465-supp-v1.zip › elife_poa_e50465_Figure_3_source_data_1.csv]

c_label	s_label	species_family	env_par	value	KM_pvalue
C-0029	S-05113	C. oiwi	substrate_temperature	26.9	2.1353951383153164e-16
C-0037	S-05095	C. oiwi	substrate_temperature	25.1	2.1353951383153164e-16
C-0047	S-05103	C. oiwi	substrate_temperature	27.3	2.1353951383153164e-16
C-0053	S-05061	C. oiwi	substrate_temperature	22.5	2.1353951383153164e-16
C-0055	S-05075	C. oiwi	substrate_temperature	22.6	2.1353951383153164e-16
C-0065	S-05082	C. oiwi	substrate_temperature	21.8	2.1353951383153164e-16
C-0065	S-05096	C. briggsae	substrate_temperature	21.8	2.1353951383153164e-16
C-0072	S-05046	C. oiwi	substrate_temperature	23.2	2.1353951383153164e-16
C-0080	S-05074	C. tropicalis	substrate_temperature	24.4	2.1353951383153164e-16
C-0084	S-05114	C. oiwi	substrate_temperature	22.8	2.1353951383153164e-16
C-0085	S-05097	C. tropicalis	substrate_temperature	22.9	2.1353951383153164e-16
C-0094	S-05047	C. briggsae	substrate_temperature	32.9	2.1353951383153164e-16
C-0096	S-05049	C. briggsae	substrate_temperature	27.9	2.1353951383153164e-16
C-0097	S-05035	C. briggsae	substrate_temperature	28	2.1353951383153164e-16
C-0119	S-05171	C. briggsae	substrate_temperature	24.3	2.1353951383153164e-16
C-0223	S-05274	C. briggsae	substrate_temperature	23.4	2.1353951383153164e-16
C-0253	S-05580	C. briggsae	substrate_temperature	23.2	2.1353951383153164e-16
C-0257	S-05637	C. oiwi	substrate_temperature	22.4	2.1353951383153164e-16
C-0264	S-05581	C. briggsae	substrate_temperature	21.9	2.1353951383153164e-16
C-0266	S-07467	C. briggsae	substrate_temperature	22.7	2.1353951383153164e-16
C-0271	S-07483	C. briggsae	substrate_temperature	23	2.1353951383153164e-16
C-0280	S-05575	C. briggsae	substrate_temperature	24.2	2.1353951383153164e-16
C-0288	S-07481	C. briggsae	substrate_temperature	22.1	2.1353951383153164e-16
C-0314	S-05944	C. briggsae	substrate_temperature	29.2	2.1353951383153164e-16
C-0317	S-05937	C. briggsae	substrate_temperature	25.6	2.1353951383153164e-16
C-0343	S-06610	C. briggsae	substrate_temperature	22.8	2.1353951383153164e-16
C-0355	S-06521	C. briggsae	substrate_temperature	22.8	2.1353951383153164e-16
C-0365	S-06558	C. elegans	substrate_temperature	15.6	2.1353951383153164e-16
C-0376	S-06708	C. briggsae	substrate_temperature	23.5	2.1353951383153164e-16
C-0380	S-06686	C. briggsae	substrate_temperature	25.4	2.1353951383153164e-16
C-0380	S-06687	C. tropicalis	substrate_temperature	25.4	2.1353951383153164e-16
C-0392	S-06770	C. briggsae	substrate_temperature	23	2.1353951383153164e-16
C-0408	S-06719	C. briggsae	substrate_temperature	24.9	2.1353951383153164e-16
C-0412	S-06751	C. briggsae	substrate_temperature	25.5	2.1353951383153164e-16
C-0418	S-05793	C. briggsae	substrate_temperature	18.3	2.1353951383153164e-16
C-0420	S-06715	C. tropicalis	substrate_temperature	24.3	2.1353951383153164e-16
C-0421	S-05554	C. briggsae	substrate_temperature	22.8	2.1353951383153164e-16
C-0433	S-05578	C. briggsae	substrate_temperature	23	2.1353951383153164e-16
C-0442	S-05485	C. briggsae	substrate_temperature	21.9	2.1353951383153164e-16
C-0666	S-05421	C. briggsae	substrate_temperature	20.8	2.1353951383153164e-16
C-0736	S-06447	C. elegans	substrate_temperature	22.4	2.1353951383153164e-16
C-0776	S-05566	C. briggsae	substrate_temperature	22.4	2.1353951383153164e-16
C-0781	S-05631	C. briggsae	substrate_temperature	21.6	2.1353951383153164e-16
C-0789	S-07468	C. briggsae	substrate_temperature	23.1	2.1353951383153164e-16
C-0790	S-05647	C. briggsae	substrate_temperature	22.3	2.1353951383153164e-16
C-0799	S-05512	C. briggsae	substrate_temperature	22.8	2.1353951383153164e-16
C-0800	S-07503	C. briggsae	substrate_temperature	23.7	2.1353951383153164e-16
C-0803	S-05197	C. oiwi	substrate_temperature	23.2	2.1353951383153164e-16
C-0846	S-05666	C. briggsae	substrate_temperature	23.5	2.1353951383153164e-16
C-0878	S-05949	C. briggsae	substrate_temperature	23.1	2.1353951383153164e-16
C-0905	S-06580	C. briggsae	substrate_temperature	22.6	2.1353951383153164e-16
C-0913	S-06734	C. briggsae	substrate_temperature	26.5	2.1353951383153164e-16
C-0921	S-05784	C. briggsae	substrate_temperature	23.3	2.1353951383153164e-16
C-0923	S-05918	C. tropicalis	substrate_temperature	24.5	2.1353951383153164e-16
C-0929	S-05958	C. briggsae	substrate_temperature	24.1	2.1353951383153164e-16
C-0935	S-05703	C. briggsae	substrate_temperature	24.1	2.1353951383153164e-16
C-0949	S-05772	C. briggsae	substrate_temperature	25.2	2.1353951383153164e-16
C-0957	S-05770	C. briggsae	substrate_temperature	27.5	2.1353951383153164e-16
C-0958	S-05741	C. briggsae	substrate_temperature	23.2	2.1353951383153164e-16
C-0964	S-05736	C. briggsae	substrate_temperature	23.3	2.1353951383153164e-16
C-0982	S-05954	C. briggsae	substrate_temperature	23.5	2.1353951383153164e-16
C-0989	S-05794	C. tropicalis	substrate_temperature	31.8	2.1353951383153164e-16
C-1000	S-05787	C. briggsae	substrate_temperature	24.5	2.1353951383153164e-16
C-1002	S-05765	C. briggsae	substrate_temperature	22.8	2.1353951383153164e-16
C-1004	S-05763	C. briggsae	substrate_temperature	24.5	2.1353951383153164e-16
C-1018	S-05927	C. briggsae	substrate_temperature	24.6	2.1353951383153164e-16
C-1019	S-05947	C. briggsae	substrate_temperature	24.5	2.1353951383153164e-16
C-1026	S-05620	C. briggsae	substrate_temperature	22.4	2.1353951383153164e-16
C-1029	S-05556	C. briggsae	substrate_temperature	22.8	2.1353951383153164e-16
C-1031	S-05540	C. briggsae	substrate_temperature	22.8	2.1353951383153164e-16
C-1032	S-05670	C. briggsae	substrate_temperature	23	2.1353951383153164e-16
C-1033	S-05576	C. briggsae	substrate_temperature	23.2	2.1353951383153164e-16
C-1041	S-05190	C. briggsae	substrate_temperature	22.5	2.1353951383153164e-16
C-1042	S-05203	C. briggsae	substrate_temperature	21.9	2.1353951383153164e-16
C-1044	S-07474	C. briggsae	substrate_temperature	22.8	2.1353951383153164e-16
C-1047	S-05530	C. briggsae	substrate_temperature	22.4	2.1353951383153164e-16
C-1073	S-05234	C. briggsae	substrate_temperature	23.2	2.1353951383153164e-16
C-1074	S-05661	C. briggsae	substrate_temperature	22.9	2.1353951383153164e-16
C-1079	S-05213	C. oiwi	substrate_temperature	23.1	2.1353951383153164e-16
C-1083	S-05799	C. tropicalis	substrate_temperature	22.6	2.1353951383153164e-16
C-1089	S-05709	C. briggsae	substrate_temperature	23.3	2.1353951383153164e-16
C-1121	S-05732	C. briggsae	substrate_temperature	22.5	2.1353951383153164e-16
C-1142	S-06560	C. elegans	substrate_temperature	16.9	2.1353951383153164e-16
C-1175	S-05886	C. elegans	substrate_temperature	19.2	2.1353951383153164e-16
C-1185	S-06607	C. briggsae	substrate_temperature	23.6	2.1353951383153164e-16
C-1218	S-06745	C. briggsae	substrate_temperature	27.2	2.1353951383153164e-16
C-1245	S-06621	C. tropicalis	substrate_temperature	29.3	2.1353951383153164e-16
C-1329	S-06571	C. elegans	substrate_temperature	18.2	2.1353951383153164e-16
C-1369	S-06654	C. briggsae	substrate_temperature	15.1	2.1353951383153164e-16
C-1371	S-06647	C. briggsae	substrate_temperature	26.6	2.1353951383153164e-16
C-1402	S-06897	C. briggsae	substrate_temperature	24.2	2.1353951383153164e-16
C-1480	S-06857	C. elegans	substrate_temperature	20.7	2.1353951383153164e-16
C-1489	S-06823	C. elegans	substrate_temperature	18.2	2.1353951383153164e-16
C-1513	S-06906	C. briggsae	substrate_temperature	25.1	2.1353951383153164e-16
C-2527	S-06740	C. briggsae	substrate_temperature	23.1	2.1353951383153164e-16
C-2530	S-06892	C. briggsae	substrate_temperature	24.4	2.1353951383153164e-16
C-2546	S-06869	C. briggsae	substrate_temperature	24.5	2.1353951383153164e-16
C-2554	S-06950	C. briggsae	substrate_temperature	27.4	2.1353951383153164e-16
C-2604	S-06898	C. briggsae	substrate_temperature	24	2.1353951383153164e-16
C-2609	S-06673	C. briggsae	substrate_temperature	25.3	2.1353951383153164e-16
C-2616	S-06772	C. briggsae	substrate_temperature	23.7	2.1353951383153164e-16
C-2669	S-06337	C. briggsae	substrate_temperature	26.8	2.1353951383153164e-16
C-2677	S-07052	C. elegans	substrate_temperature	17.5	2.1353951383153164e-16
C-2720	S-07049	C. briggsae	substrate_temperature	24.4	2.1353951383153164e-16
C-2735	S-06437	C. briggsae	substrate_temperature	24.2	2.1353951383153164e-16
C-2756	S-07100	C. briggsae	substrate_temperature	23.2	2.1353951383153164e-16
C-2767	S-06173	C. briggsae	substrate_temperature	26	2.1353951383153164e-16
C-2772	S-06280	C. briggsae	substrate_temperature	24.2	2.1353951383153164e-16
C-2794	S-06294	C. briggsae	substrate_temperature	18.6	2.1353951383153164e-16
C-2805	S-06224	C. elegans	substrate_temperature	18	2.1353951383153164e-16
C-2824	S-07420	C. elegans	substrate_temperature	20.6	2.1353951383153164e-16
C-2827	S-06105	C. tropicalis	substrate_temperature	25.3	2.1353951383153164e-16
C-2828	S-07315	C. elegans	substrate_temperature	21.2	2.1353951383153164e-16
C-2830	S-07273	C. elegans	substrate_temperature	20.2	2.1353951383153164e-16
C-2836	S-07228	C. elegans	substrate_temperature	20.1	2.1353951383153164e-16
C-2840	S-07355	C. elegans	substrate_temperature	20.7	2.1353951383153164e-16
C-2845	S-06039	C. briggsae	substrate_temperature	25.2	2.1353951383153164e-16
C-2849	S-06145	C. briggsae	substrate_temperature	21.7	2.1353951383153164e-16
C-2850	S-06013	C. briggsae	substrate_temperature	25.5	2.1353951383153164e-16
C-2856	S-07368	C. elegans	substrate_temperature	21.9	2.1353951383153164e-16
C-2857	S-06153	C. briggsae	substrate_temperature	26.6	2.1353951383153164e-16
C-2857	S-06168	C. tropicalis	substrate_temperature	26.6	2.1353951383153164e-16
C-2861	S-06001	C. briggsae	substrate_temperature	24.2	2.1353951383153164e-16
C-2865	S-07097	C. elegans	substrate_temperature	20.6	2.1353951383153164e-16
C-2879	S-07384	C. elegans	substrate_temperature	20.5	2.1353951383153164e-16
C-2880	S-07225	C. elegans	substrate_temperature	20.1	2.1353951383153164e-16
C-2906	S-05993	C. tropicalis	substrate_temperature	26.2	2.1353951383153164e-16
C-2909	S-06150	C. tropicalis	substrate_temperature	28.3	2.1353951383153164e-16
C-2915	S-06192	C. tropicalis	substrate_temperature	26.6	2.1353951383153164e-16
C-2916	S-06055	C. briggsae	substrate_temperature	24.3	2.1353951383153164e-16
C-3007	S-06241	C. elegans	substrate_temperature	18	2.1353951383153164e-16
C-3028	S-06285	C. briggsae	substrate_temperature	22	2.1353951383153164e-16
C-3031	S-06022	C. briggsae	substrate_temperature	22.1	2.1353951383153164e-16
C-3043	S-06307	C. briggsae	substrate_temperature	19.2	2.1353951383153164e-16
C-3058	S-06322	C. elegans	substrate_temperature	15	2.1353951383153164e-16
C-3085	S-06213	C. elegans	substrate_temperature	14.7	2.1353951383153164e-16
C-3093	S-05969	C. briggsae	substrate_temperature	26.1	2.1353951383153164e-16
C-3096	S-06245	C. briggsae	substrate_temperature	18.4	2.1353951383153164e-16
C-3097	S-06054	C. elegans	substrate_temperature	15.4	2.1353951383153164e-16
C-3114	S-06174	C. elegans	substrate_temperature	19.6	2.1353951383153164e-16
C-3133	S-05962	C. elegans	substrate_temperature	18.7	2.1353951383153164e-16
C-3143	S-07541	C. elegans	substrate_temperature	19.8	2.1353951383153164e-16
C-3151	S-07530	C. elegans	substrate_temperature	19.8	2.1353951383153164e-16
C-3155	S-07385	C. elegans	substrate_temperature	21.5	2.1353951383153164e-16
C-3160	S-06096	C. elegans	substrate_temperature	22.2	2.1353951383153164e-16
C-3164	S-05967	C. elegans	substrate_temperature	21.2	2.1353951383153164e-16
C-3178	S-06046	C. elegans	substrate_temperature	20.5	2.1353951383153164e-16
C-3189	S-07266	C. elegans	substrate_temperature	21.6	2.1353951383153164e-16
C-3197	S-07305	C. elegans	substrate_temperature	19.4	2.1353951383153164e-16
C-3201	S-07378	C. elegans	substrate_temperature	19.4	2.1353951383153164e-16
C-3205	S-07424	C. elegans	substrate_temperature	19	2.1353951383153164e-16
C-3264	S-06386	C. elegans	substrate_temperature	23.3	2.1353951383153164e-16
C-3266	S-06383	C. elegans	substrate_temperature	20.4	2.1353951383153164e-16
C-3267	S-07204	C. briggsae	substrate_temperature	22	2.1353951383153164e-16
C-3270	S-07107	C. elegans	substrate_temperature	18.5	2.1353951383153164e-16
C-3294	S-06373	C. elegans	substrate_temperature	15.4	2.1353951383153164e-16
C-3525	S-07255	C. briggsae	substrate_temperature	24.4	2.1353951383153164e-16
C-3533	S-07350	C. oiwi	substrate_temperature	24.9	2.1353951383153164e-16
C-0029	S-05113	C. oiwi	substrate_moisture	59	0.00213809089872124
C-0037	S-05095	C. oiwi	substrate_moisture	56	0.00213809089872124
C-0047	S-05103	C. oiwi	substrate_moisture	NA	0.00213809089872124
C-0053	S-05061	C. oiwi	substrate_moisture	43.5	0.00213809089872124
C-0055	S-05075	C. oiwi	substrate_moisture	57	0.00213809089872124
C-0065	S-05082	C. oiwi	substrate_moisture	46	0.00213809089872124
C-0065	S-05096	C. briggsae	substrate_moisture	46	0.00213809089872124
C-0072	S-05046	C. oiwi	substrate_moisture	54.5	0.00213809089872124
C-0080	S-05074	C. tropicalis	substrate_moisture	38	0.00213809089872124
C-0084	S-05114	C. oiwi	substrate_moisture	50.5	0.00213809089872124
C-0085	S-05097	C. tropicalis	substrate_moisture	60.5	0.00213809089872124
C-0094	S-05047	C. briggsae	substrate_moisture	55.5	0.00213809089872124
C-0096	S-05049	C. briggsae	substrate_moisture	44.5	0.00213809089872124
C-0097	S-05035	C. briggsae	substrate_moisture	24.5	0.00213809089872124
C-0119	S-05171	C. briggsae	substrate_moisture	47	0.00213809089872124
C-0223	S-05274	C. briggsae	substrate_moisture	58.5	0.00213809089872124
C-0253	S-05580	C. briggsae	substrate_moisture	NA	0.00213809089872124
C-0257	S-05637	C. oiwi	substrate_moisture	NA	0.00213809089872124
C-0264	S-05581	C. briggsae	substrate_moisture	66.5	0.00213809089872124
C-0266	S-07467	C. briggsae	substrate_moisture	NA	0.00213809089872124
C-0271	S-07483	C. briggsae	substrate_moisture	59	0.00213809089872124
C-0280	S-05575	C. briggsae	substrate_moisture	68	0.00213809089872124
C-0288	S-07481	C. briggsae	substrate_moisture	69.5	0.00213809089872124
C-0314	S-05944	C. briggsae	substrate_moisture	64.5	0.00213809089872124
C-0317	S-05937	C. briggsae	substrate_moisture	NA	0.00213809089872124
C-0343	S-06610	C. briggsae	substrate_moisture	65	0.00213809089872124
C-0355	S-06521	C. briggsae	substrate_moisture	65.5	0.00213809089872124
C-0365	S-06558	C. elegans	substrate_moisture	70.5	0.00213809089872124
C-0376	S-06708	C. briggsae	substrate_moisture	64.5	0.00213809089872124
C-0380	S-06686	C. briggsae	substrate_moisture	69	0.00213809089872124
C-0380	S-06687	C. tropicalis	substrate_moisture	69	0.00213809089872124
C-0392	S-06770	C. briggsae	substrate_moisture	68.5	0.00213809089872124
C-0408	S-06719	C. briggsae	substrate_moisture	49.9	0.00213809089872124
C-0412	S-06751	C. briggsae	substrate_moisture	65.5	0.00213809089872124
C-0418	S-05793	C. briggsae	substrate_moisture	48	0.00213809089872124
C-0420	S-06715	C. tropicalis	substrate_moisture	66	0.00213809089872124
C-0421	S-05554	C. briggsae	substrate_moisture	NA	0.00213809089872124
C-0433	S-05578	C. briggsae	substrate_moisture	NA	0.00213809089872124
C-0442	S-05485	C. briggsae	substrate_moisture	NA	0.00213809089872124
C-0666	S-05421	C. briggsae	substrate_moisture	68	0.00213809089872124
C-0736	S-06447	C. elegans	substrate_moisture	66.5	0.00213809089872124
C-0776	S-05566	C. briggsae	substrate_moisture	64	0.00213809089872124
C-0781	S-05631	C. briggsae	substrate_moisture	61.5	0.00213809089872124
C-0789	S-07468	C. briggsae	substrate_moisture	64	0.00213809089872124
C-0790	S-05647	C. briggsae	substrate_moisture	58	0.00213809089872124
C-0799	S-05512	C. briggsae	substrate_moisture	66.5	0.00213809089872124
C-0800	S-07503	C. briggsae	substrate_moisture	67.5	0.00213809089872124
C-0803	S-05197	C. oiwi	substrate_moisture	NA	0.00213809089872124
C-0846	S-05666	C. briggsae	substrate_moisture	NA	0.00213809089872124
C-0878	S-05949	C. briggsae	substrate_moisture	73.5	0.00213809089872124
C-0905	S-06580	C. briggsae	substrate_moisture	61	0.00213809089872124
C-0913	S-06734	C. briggsae	substrate_moisture	57.5	0.00213809089872124
C-0921	S-05784	C. briggsae	substrate_moisture	66	0.00213809089872124
C-0923	S-05918	C. tropicalis	substrate_moisture	NA	0.00213809089872124
C-0929	S-05958	C. briggsae	substrate_moisture	50	0.00213809089872124
C-0935	S-05703	C. briggsae	substrate_moisture	NA	0.00213809089872124
C-0949	S-05772	C. briggsae	substrate_moisture	NA	0.00213809089872124
C-0957	S-05770	C. briggsae	substrate_moisture	64	0.00213809089872124
C-0958	S-05741	C. briggsae	substrate_moisture	59	0.00213809089872124
C-0964	S-05736	C. briggsae	substrate_moisture	42.5	0.00213809089872124
C-0982	S-05954	C. briggsae	substrate_moisture	43	0.00213809089872124
C-0989	S-05794	C. tropicalis	substrate_moisture	65.5	0.00213809089872124
C-1000	S-05787	C. briggsae	substrate_moisture	49.5	0.00213809089872124
C-1002	S-05765	C. briggsae	substrate_moisture	49	0.00213809089872124
C-1004	S-05763	C. briggsae	substrate_moisture	63	0.00213809089872124
C-1018	S-05927	C. briggsae	substrate_moisture	66	0.00213809089872124
C-1019	S-05947	C. briggsae	substrate_moisture	53	0.00213809089872124
C-1026	S-05620	C. briggsae	substrate_moisture	NA	0.00213809089872124
C-1029	S-05556	C. briggsae	substrate_moisture	NA	0.00213809089872124
C-1031	S-05540	C. briggsae	substrate_moisture	69	0.00213809089872124
C-1032	S-05670	C. briggsae	substrate_moisture	69	0.00213809089872124
C-1033	S-05576	C. briggsae	substrate_moisture	NA	0.00213809089872124
C-1041	S-05190	C. briggsae	substrate_moisture	NA	0.00213809089872124
C-1042	S-05203	C. briggsae	substrate_moisture	56.5	0.00213809089872124
C-1044	S-07474	C. briggsae	substrate_moisture	NA	0.00213809089872124
C-1047	S-05530	C. briggsae	substrate_moisture	60	0.00213809089872124
C-1073	S-05234	C. briggsae	substrate_moisture	57	0.00213809089872124
C-1074	S-05661	C. briggsae	substrate_moisture	58.5	0.00213809089872124
C-1079	S-05213	C. oiwi	substrate_moisture	56.5	0.00213809089872124
C-1083	S-05799	C. tropicalis	substrate_moisture	68.5	0.00213809089872124
C-1089	S-05709	C. briggsae	substrate_moisture	62.5	0.00213809089872124
C-1121	S-05732	C. briggsae	substrate_moisture	66	0.00213809089872124
C-1142	S-06560	C. elegans	substrate_moisture	73.5	0.00213809089872124
C-1175	S-05886	C. elegans	substrate_moisture	NA	0.00213809089872124
C-1185	S-06607	C. briggsae	substrate_moisture	63	0.00213809089872124
C-1218	S-06745	C. briggsae	substrate_moisture	66.5	0.00213809089872124
C-1245	S-06621	C. tropicalis	substrate_moisture	64.5	0.00213809089872124
C-1329	S-06571	C. elegans	substrate_moisture	68.5	0.00213809089872124
C-1369	S-06654	C. briggsae	substrate_moisture	68	0.00213809089872124
C-1371	S-06647	C. briggsae	substrate_moisture	61	0.00213809089872124
C-1402	S-06897	C. briggsae	substrate_moisture	67	0.00213809089872124
C-1480	S-06857	C. elegans	substrate_moisture	25.5	0.00213809089872124
C-1489	S-06823	C. elegans	substrate_moisture	30	0.00213809089872124
C-1513	S-06906	C. briggsae	substrate_moisture	66	0.00213809089872124
C-2527	S-06740	C. briggsae	substrate_moisture	60	0.00213809089872124
C-2530	S-06892	C. briggsae	substrate_moisture	65.5	0.00213809089872124
C-2546	S-06869	C. briggsae	substrate_moisture	69.5	0.00213809089872124
C-2554	S-06950	C. briggsae	substrate_moisture	44.5	0.00213809089872124
C-2604	S-06898	C. briggsae	substrate_moisture	64.5	0.00213809089872124
C-2609	S-06673	C. briggsae	substrate_moisture	62.5	0.00213809089872124
C-2616	S-06772	C. briggsae	substrate_moisture	60	0.00213809089872124
C-2669	S-06337	C. briggsae	substrate_moisture	NA	0.00213809089872124
C-2677	S-07052	C. elegans	substrate_moisture	66.5	0.00213809089872124
C-2720	S-07049	C. briggsae	substrate_moisture	67.5	0.00213809089872124
C-2735	S-06437	C. briggsae	substrate_moisture	49	0.00213809089872124
C-2756	S-07100	C. briggsae	substrate_moisture	38	0.00213809089872124
C-2767	S-06173	C. briggsae	substrate_moisture	67	0.00213809089872124
C-2772	S-06280	C. briggsae	substrate_moisture	NA	0.00213809089872124
C-2794	S-06294	C. briggsae	substrate_moisture	62.5	0.00213809089872124
C-2805	S-06224	C. elegans	substrate_moisture	70.5	0.00213809089872124
C-2824	S-07420	C. elegans	substrate_moisture	NA	0.00213809089872124
C-2827	S-06105	C. tropicalis	substrate_moisture	NA	0.00213809089872124
C-2828	S-07315	C. elegans	substrate_moisture	67.5	0.00213809089872124
C-2830	S-07273	C. elegans	substrate_moisture	NA	0.00213809089872124
C-2836	S-07228	C. elegans	substrate_moisture	NA	0.00213809089872124
C-2840	S-07355	C. elegans	substrate_moisture	70	0.00213809089872124
C-2845	S-06039	C. briggsae	substrate_moisture	NA	0.00213809089872124
C-2849	S-06145	C. briggsae	substrate_moisture	NA	0.00213809089872124
C-2850	S-06013	C. briggsae	substrate_moisture	NA	0.00213809089872124
C-2856	S-07368	C. elegans	substrate_moisture	69	0.00213809089872124
C-2857	S-06153	C. briggsae	substrate_moisture	68.5	0.00213809089872124
C-2857	S-06168	C. tropicalis	substrate_moisture	68.5	0.00213809089872124
C-2861	S-06001	C. briggsae	substrate_moisture	66	0.00213809089872124
C-2865	S-07097	C. elegans	substrate_moisture	36	0.00213809089872124
C-2879	S-07384	C. elegans	substrate_moisture	67	0.00213809089872124
C-2880	S-07225	C. elegans	substrate_moisture	NA	0.00213809089872124
C-2906	S-05993	C. tropicalis	substrate_moisture	NA	0.00213809089872124
C-2909	S-06150	C. tropicalis	substrate_moisture	NA	0.00213809089872124
C-2915	S-06192	C. tropicalis	substrate_moisture	NA	0.00213809089872124
C-2916	S-06055	C. briggsae	substrate_moisture	NA	0.00213809089872124
C-3007	S-06241	C. elegans	substrate_moisture	64	0.00213809089872124
C-3028	S-06285	C. briggsae	substrate_moisture	62.5	0.00213809089872124
C-3031	S-06022	C. briggsae	substrate_moisture	67.2	0.00213809089872124
C-3043	S-06307	C. briggsae	substrate_moisture	61.5	0.00213809089872124
C-3058	S-06322	C. elegans	substrate_moisture	NA	0.00213809089872124
C-3085	S-06213	C. elegans	substrate_moisture	70	0.00213809089872124
C-3093	S-05969	C. briggsae	substrate_moisture	67.5	0.00213809089872124
C-3096	S-06245	C. briggsae	substrate_moisture	NA	0.00213809089872124
C-3097	S-06054	C. elegans	substrate_moisture	71.5	0.00213809089872124
C-3114	S-06174	C. elegans	substrate_moisture	NA	0.00213809089872124
C-3133	S-05962	C. elegans	substrate_moisture	65	0.00213809089872124
C-3143	S-07541	C. elegans	substrate_moisture	68.5	0.00213809089872124
C-3151	S-07530	C. elegans	substrate_moisture	67.5	0.00213809089872124
C-3155	S-07385	C. elegans	substrate_moisture	NA	0.00213809089872124
C-3160	S-06096	C. elegans	substrate_moisture	NA	0.00213809089872124
C-3164	S-05967	C. elegans	substrate_moisture	NA	0.00213809089872124
C-3178	S-06046	C. elegans	substrate_moisture	64	0.00213809089872124
C-3189	S-07266	C. elegans	substrate_moisture	68.5	0.00213809089872124
C-3197	S-07305	C. elegans	substrate_moisture	NA	0.00213809089872124
C-3201	S-07378	C. elegans	substrate_moisture	NA	0.00213809089872124
C-3205	S-07424	C. elegans	substrate_moisture	NA	0.00213809089872124
C-3264	S-06386	C. elegans	substrate_moisture	62	0.00213809089872124
C-3266	S-06383	C. elegans	substrate_moisture	42	0.00213809089872124
C-3267	S-07204	C. briggsae	substrate_moisture	51	0.00213809089872124
C-3270	S-07107	C. elegans	substrate_moisture	53	0.00213809089872124
C-3294	S-06373	C. elegans	substrate_moisture	67	0.00213809089872124
C-3525	S-07255	C. briggsae	substrate_moisture	NA	0.00213809089872124
C-3533	S-07350	C. oiwi	substrate_moisture	NA	0.00213809089872124
C-0029	S-05113	C. oiwi	ambient_humidity	79.9	0.13921566730939827
C-0037	S-05095	C. oiwi	ambient_humidity	75	0.13921566730939827
C-0047	S-05103	C. oiwi	ambient_humidity	77.1	0.13921566730939827
C-0053	S-05061	C. oiwi	ambient_humidity	78.9	0.13921566730939827
C-0055	S-05075	C. oiwi	ambient_humidity	78.9	0.13921566730939827
C-0065	S-05082	C. oiwi	ambient_humidity	77.8	0.13921566730939827
C-0065	S-05096	C. briggsae	ambient_humidity	77.8	0.13921566730939827
C-0072	S-05046	C. oiwi	ambient_humidity	72.9	0.13921566730939827
C-0080	S-05074	C. tropicalis	ambient_humidity	76	0.13921566730939827
C-0084	S-05114	C. oiwi	ambient_humidity	95.1	0.13921566730939827
C-0085	S-05097	C. tropicalis	ambient_humidity	93.7	0.13921566730939827
C-0094	S-05047	C. briggsae	ambient_humidity	53.6	0.13921566730939827
C-0096	S-05049	C. briggsae	ambient_humidity	53.1	0.13921566730939827
C-0097	S-05035	C. briggsae	ambient_humidity	55.5	0.13921566730939827
C-0119	S-05171	C. briggsae	ambient_humidity	77.5	0.13921566730939827
C-0223	S-05274	C. briggsae	ambient_humidity	64.6	0.13921566730939827
C-0253	S-05580	C. briggsae	ambient_humidity	89.7	0.13921566730939827
C-0257	S-05637	C. oiwi	ambient_humidity	82.9	0.13921566730939827
C-0264	S-05581	C. briggsae	ambient_humidity	80.4	0.13921566730939827
C-0266	S-07467	C. briggsae	ambient_humidity	79.4	0.13921566730939827
C-0271	S-07483	C. briggsae	ambient_humidity	77.5	0.13921566730939827
C-0280	S-05575	C. briggsae	ambient_humidity	67.7	0.13921566730939827
C-0288	S-07481	C. briggsae	ambient_humidity	80.4	0.13921566730939827
C-0314	S-05944	C. briggsae	ambient_humidity	82.2	0.13921566730939827
C-0317	S-05937	C. briggsae	ambient_humidity	94.6	0.13921566730939827
C-0343	S-06610	C. briggsae	ambient_humidity	82.5	0.13921566730939827
C-0355	S-06521	C. briggsae	ambient_humidity	81.8	0.13921566730939827
C-0365	S-06558	C. elegans	ambient_humidity	90.6	0.13921566730939827
C-0376	S-06708	C. briggsae	ambient_humidity	84.9	0.13921566730939827
C-0380	S-06686	C. briggsae	ambient_humidity	81.2	0.13921566730939827
C-0380	S-06687	C. tropicalis	ambient_humidity	81.2	0.13921566730939827
C-0392	S-06770	C. briggsae	ambient_humidity	83.4	0.13921566730939827
C-0408	S-06719	C. briggsae	ambient_humidity	79	0.13921566730939827
C-0412	S-06751	C. briggsae	ambient_humidity	87.8	0.13921566730939827
C-0418	S-05793	C. briggsae	ambient_humidity	64.3	0.13921566730939827
C-0420	S-06715	C. tropicalis	ambient_humidity	86.3	0.13921566730939827
C-0421	S-05554	C. briggsae	ambient_humidity	95.6	0.13921566730939827
C-0433	S-05578	C. briggsae	ambient_humidity	90.9	0.13921566730939827
C-0442	S-05485	C. briggsae	ambient_humidity	91.4	0.13921566730939827
C-0666	S-05421	C. briggsae	ambient_humidity	55	0.13921566730939827
C-0736	S-06447	C. elegans	ambient_humidity	70.6	0.13921566730939827
C-0776	S-05566	C. briggsae	ambient_humidity	78.7	0.13921566730939827
C-0781	S-05631	C. briggsae	ambient_humidity	77.1	0.13921566730939827
C-0789	S-07468	C. briggsae	ambient_humidity	88.8	0.13921566730939827
C-0790	S-05647	C. briggsae	ambient_humidity	86.1	0.13921566730939827
C-0799	S-05512	C. briggsae	ambient_humidity	83.1	0.13921566730939827
C-0800	S-07503	C. briggsae	ambient_humidity	83.9	0.13921566730939827
C-0803	S-05197	C. oiwi	ambient_humidity	81	0.13921566730939827
C-0846	S-05666	C. briggsae	ambient_humidity	70.6	0.13921566730939827
C-0878	S-05949	C. briggsae	ambient_humidity	81.8	0.13921566730939827
C-0905	S-06580	C. briggsae	ambient_humidity	88.3	0.13921566730939827
C-0913	S-06734	C. briggsae	ambient_humidity	83.4	0.13921566730939827
C-0921	S-05784	C. briggsae	ambient_humidity	78.5	0.13921566730939827
C-0923	S-05918	C. tropicalis	ambient_humidity	85.3	0.13921566730939827
C-0929	S-05958	C. briggsae	ambient_humidity	68.7	0.13921566730939827
C-0935	S-05703	C. briggsae	ambient_humidity	68.2	0.13921566730939827
C-0949	S-05772	C. briggsae	ambient_humidity	62.9	0.13921566730939827
C-0957	S-05770	C. briggsae	ambient_humidity	62.7	0.13921566730939827
C-0958	S-05741	C. briggsae	ambient_humidity	75.6	0.13921566730939827
C-0964	S-05736	C. briggsae	ambient_humidity	79.6	0.13921566730939827
C-0982	S-05954	C. briggsae	ambient_humidity	79	0.13921566730939827
C-0989	S-05794	C. tropicalis	ambient_humidity	58.4	0.13921566730939827
C-1000	S-05787	C. briggsae	ambient_humidity	76.6	0.13921566730939827
C-1002	S-05765	C. briggsae	ambient_humidity	76.9	0.13921566730939827
C-1004	S-05763	C. briggsae	ambient_humidity	77.1	0.13921566730939827
C-1018	S-05927	C. briggsae	ambient_humidity	70	0.13921566730939827
C-1019	S-05947	C. briggsae	ambient_humidity	69.8	0.13921566730939827
C-1026	S-05620	C. briggsae	ambient_humidity	92.6	0.13921566730939827
C-1029	S-05556	C. briggsae	ambient_humidity	84.7	0.13921566730939827
C-1031	S-05540	C. briggsae	ambient_humidity	96	0.13921566730939827
C-1032	S-05670	C. briggsae	ambient_humidity	85.6	0.13921566730939827
C-1033	S-05576	C. briggsae	ambient_humidity	77.7	0.13921566730939827
C-1041	S-05190	C. briggsae	ambient_humidity	97.5	0.13921566730939827
C-1042	S-05203	C. briggsae	ambient_humidity	97.5	0.13921566730939827
C-1044	S-07474	C. briggsae	ambient_humidity	95.5	0.13921566730939827
C-1047	S-05530	C. briggsae	ambient_humidity	97	0.13921566730939827
C-1073	S-05234	C. briggsae	ambient_humidity	86.7	0.13921566730939827
C-1074	S-05661	C. briggsae	ambient_humidity	97.5	0.13921566730939827
C-1079	S-05213	C. oiwi	ambient_humidity	79.4	0.13921566730939827
C-1083	S-05799	C. tropicalis	ambient_humidity	77.4	0.13921566730939827
C-1089	S-05709	C. briggsae	ambient_humidity	75.5	0.13921566730939827
C-1121	S-05732	C. briggsae	ambient_humidity	76.6	0.13921566730939827
C-1142	S-06560	C. elegans	ambient_humidity	80.4	0.13921566730939827
C-1175	S-05886	C. elegans	ambient_humidity	79.9	0.13921566730939827
C-1185	S-06607	C. briggsae	ambient_humidity	90.2	0.13921566730939827
C-1218	S-06745	C. briggsae	ambient_humidity	81	0.13921566730939827
C-1245	S-06621	C. tropicalis	ambient_humidity	74.4	0.13921566730939827
C-1329	S-06571	C. elegans	ambient_humidity	90.1	0.13921566730939827
C-1369	S-06654	C. briggsae	ambient_humidity	93.4	0.13921566730939827
C-1371	S-06647	C. briggsae	ambient_humidity	76.3	0.13921566730939827
C-1402	S-06897	C. briggsae	ambient_humidity	69.1	0.13921566730939827
C-1480	S-06857	C. elegans	ambient_humidity	65.3	0.13921566730939827
C-1489	S-06823	C. elegans	ambient_humidity	67.3	0.13921566730939827
C-1513	S-06906	C. briggsae	ambient_humidity	73.3	0.13921566730939827
C-2527	S-06740	C. briggsae	ambient_humidity	73.1	0.13921566730939827
C-2530	S-06892	C. briggsae	ambient_humidity	65.3	0.13921566730939827
C-2546	S-06869	C. briggsae	ambient_humidity	70.5	0.13921566730939827
C-2554	S-06950	C. briggsae	ambient_humidity	62.1	0.13921566730939827
C-2604	S-06898	C. briggsae	ambient_humidity	70.5	0.13921566730939827
C-2609	S-06673	C. briggsae	ambient_humidity	78.1	0.13921566730939827
C-2616	S-06772	C. briggsae	ambient_humidity	83.4	0.13921566730939827
C-2669	S-06337	C. briggsae	ambient_humidity	59.6	0.13921566730939827
C-2677	S-07052	C. elegans	ambient_humidity	80	0.13921566730939827
C-2720	S-07049	C. briggsae	ambient_humidity	72.1	0.13921566730939827
C-2735	S-06437	C. briggsae	ambient_humidity	73.5	0.13921566730939827
C-2756	S-07100	C. briggsae	ambient_humidity	71.3	0.13921566730939827
C-2767	S-06173	C. briggsae	ambient_humidity	69.1	0.13921566730939827
C-2772	S-06280	C. briggsae	ambient_humidity	68.2	0.13921566730939827
C-2794	S-06294	C. briggsae	ambient_humidity	85.1	0.13921566730939827
C-2805	S-06224	C. elegans	ambient_humidity	82	0.13921566730939827
C-2824	S-07420	C. elegans	ambient_humidity	83.1	0.13921566730939827
C-2827	S-06105	C. tropicalis	ambient_humidity	68	0.13921566730939827
C-2828	S-07315	C. elegans	ambient_humidity	84.2	0.13921566730939827
C-2830	S-07273	C. elegans	ambient_humidity	81.3	0.13921566730939827
C-2836	S-07228	C. elegans	ambient_humidity	80.5	0.13921566730939827
C-2840	S-07355	C. elegans	ambient_humidity	82.7	0.13921566730939827
C-2845	S-06039	C. briggsae	ambient_humidity	66.4	0.13921566730939827
C-2849	S-06145	C. briggsae	ambient_humidity	64.4	0.13921566730939827
C-2850	S-06013	C. briggsae	ambient_humidity	67	0.13921566730939827
C-2856	S-07368	C. elegans	ambient_humidity	87.6	0.13921566730939827
C-2857	S-06153	C. briggsae	ambient_humidity	65.5	0.13921566730939827
C-2857	S-06168	C. tropicalis	ambient_humidity	65.5	0.13921566730939827
C-2861	S-06001	C. briggsae	ambient_humidity	66.1	0.13921566730939827
C-2865	S-07097	C. elegans	ambient_humidity	82.6	0.13921566730939827
C-2879	S-07384	C. elegans	ambient_humidity	84.2	0.13921566730939827
C-2880	S-07225	C. elegans	ambient_humidity	81.8	0.13921566730939827
C-2906	S-05993	C. tropicalis	ambient_humidity	69.3	0.13921566730939827
C-2909	S-06150	C. tropicalis	ambient_humidity	67.4	0.13921566730939827
C-2915	S-06192	C. tropicalis	ambient_humidity	84.7	0.13921566730939827
C-2916	S-06055	C. briggsae	ambient_humidity	69	0.13921566730939827
C-3007	S-06241	C. elegans	ambient_humidity	68	0.13921566730939827
C-3028	S-06285	C. briggsae	ambient_humidity	69.1	0.13921566730939827
C-3031	S-06022	C. briggsae	ambient_humidity	73.5	0.13921566730939827
C-3043	S-06307	C. briggsae	ambient_humidity	57.9	0.13921566730939827
C-3058	S-06322	C. elegans	ambient_humidity	94	0.13921566730939827
C-3085	S-06213	C. elegans	ambient_humidity	94	0.13921566730939827
C-3093	S-05969	C. briggsae	ambient_humidity	68.3	0.13921566730939827
C-3096	S-06245	C. briggsae	ambient_humidity	72	0.13921566730939827
C-3097	S-06054	C. elegans	ambient_humidity	94	0.13921566730939827
C-3114	S-06174	C. elegans	ambient_humidity	81.1	0.13921566730939827
C-3133	S-05962	C. elegans	ambient_humidity	75	0.13921566730939827
C-3143	S-07541	C. elegans	ambient_humidity	80.9	0.13921566730939827
C-3151	S-07530	C. elegans	ambient_humidity	81.9	0.13921566730939827
C-3155	S-07385	C. elegans	ambient_humidity	NA	0.13921566730939827
C-3160	S-06096	C. elegans	ambient_humidity	77.4	0.13921566730939827
C-3164	S-05967	C. elegans	ambient_humidity	75.9	0.13921566730939827
C-3178	S-06046	C. elegans	ambient_humidity	75.5	0.13921566730939827
C-3189	S-07266	C. elegans	ambient_humidity	85.7	0.13921566730939827
C-3197	S-07305	C. elegans	ambient_humidity	76.5	0.13921566730939827
C-3201	S-07378	C. elegans	ambient_humidity	78.2	0.13921566730939827
C-3205	S-07424	C. elegans	ambient_humidity	77.9	0.13921566730939827
C-3264	S-06386	C. elegans	ambient_humidity	75.5	0.13921566730939827
C-3266	S-06383	C. elegans	ambient_humidity	76.3	0.13921566730939827
C-3267	S-07204	C. briggsae	ambient_humidity	77	0.13921566730939827
C-3270	S-07107	C. elegans	ambient_humidity	85.6	0.13921566730939827
C-3294	S-06373	C. elegans	ambient_humidity	90.1	0.13921566730939827
C-3525	S-07255	C. briggsae	ambient_humidity	67.9	0.13921566730939827
C-3533	S-07350	C. oiwi	ambient_humidity	67.8	0.13921566730939827
C-0029	S-05113	C. oiwi	ambient_temperature	27	4.997890236525907e-14
C-0037	S-05095	C. oiwi	ambient_temperature	27.7	4.997890236525907e-14
C-0047	S-05103	C. oiwi	ambient_temperature	26.3	4.997890236525907e-14
C-0053	S-05061	C. oiwi	ambient_temperature	24.7	4.997890236525907e-14
C-0055	S-05075	C. oiwi	ambient_temperature	24.7	4.997890236525907e-14
C-0065	S-05082	C. oiwi	ambient_temperature	24	4.997890236525907e-14
C-0065	S-05096	C. briggsae	ambient_temperature	24	4.997890236525907e-14
C-0072	S-05046	C. oiwi	ambient_temperature	24.66666666666667	4.997890236525907e-14
C-0080	S-05074	C. tropicalis	ambient_temperature	26.72222222222222	4.997890236525907e-14
C-0084	S-05114	C. oiwi	ambient_temperature	22.9	4.997890236525907e-14
C-0085	S-05097	C. tropicalis	ambient_temperature	22.9	4.997890236525907e-14
C-0094	S-05047	C. briggsae	ambient_temperature	32.9	4.997890236525907e-14
C-0096	S-05049	C. briggsae	ambient_temperature	33.6	4.997890236525907e-14
C-0097	S-05035	C. briggsae	ambient_temperature	30.8	4.997890236525907e-14
C-0119	S-05171	C. briggsae	ambient_temperature	25.6	4.997890236525907e-14
C-0223	S-05274	C. briggsae	ambient_temperature	26.3	4.997890236525907e-14
C-0253	S-05580	C. briggsae	ambient_temperature	24.9	4.997890236525907e-14
C-0257	S-05637	C. oiwi	ambient_temperature	24.7	4.997890236525907e-14
C-0264	S-05581	C. briggsae	ambient_temperature	25.6	4.997890236525907e-14
C-0266	S-07467	C. briggsae	ambient_temperature	24.9	4.997890236525907e-14
C-0271	S-07483	C. briggsae	ambient_temperature	24.9	4.997890236525907e-14
C-0280	S-05575	C. briggsae	ambient_temperature	27.4	4.997890236525907e-14
C-0288	S-07481	C. briggsae	ambient_temperature	25.6	4.997890236525907e-14
C-0314	S-05944	C. briggsae	ambient_temperature	26.33333333333334	4.997890236525907e-14
C-0317	S-05937	C. briggsae	ambient_temperature	24.94444444444445	4.997890236525907e-14
C-0343	S-06610	C. briggsae	ambient_temperature	25.3	4.997890236525907e-14
C-0355	S-06521	C. briggsae	ambient_temperature	25.3	4.997890236525907e-14
C-0365	S-06558	C. elegans	ambient_temperature	17.1	4.997890236525907e-14
C-0376	S-06708	C. briggsae	ambient_temperature	24.3	4.997890236525907e-14
C-0380	S-06686	C. briggsae	ambient_temperature	24.3	4.997890236525907e-14
C-0380	S-06687	C. tropicalis	ambient_temperature	24.3	4.997890236525907e-14
C-0392	S-06770	C. briggsae	ambient_temperature	24.9	4.997890236525907e-14
C-0408	S-06719	C. briggsae	ambient_temperature	24.3	4.997890236525907e-14
C-0412	S-06751	C. briggsae	ambient_temperature	22.9	4.997890236525907e-14
C-0418	S-05793	C. briggsae	ambient_temperature	23.3	4.997890236525907e-14
C-0420	S-06715	C. tropicalis	ambient_temperature	24.9	4.997890236525907e-14
C-0421	S-05554	C. briggsae	ambient_temperature	24.3	4.997890236525907e-14
C-0433	S-05578	C. briggsae	ambient_temperature	24.9	4.997890236525907e-14
C-0442	S-05485	C. briggsae	ambient_temperature	24.3	4.997890236525907e-14
C-0666	S-05421	C. briggsae	ambient_temperature	26.05555555555556	4.997890236525907e-14
C-0736	S-06447	C. elegans	ambient_temperature	24.7	4.997890236525907e-14
C-0776	S-05566	C. briggsae	ambient_temperature	24.9	4.997890236525907e-14
C-0781	S-05631	C. briggsae	ambient_temperature	24.9	4.997890236525907e-14
C-0789	S-07468	C. briggsae	ambient_temperature	24.5	4.997890236525907e-14
C-0790	S-05647	C. briggsae	ambient_temperature	24.9	4.997890236525907e-14
C-0799	S-05512	C. briggsae	ambient_temperature	25.6	4.997890236525907e-14
C-0800	S-07503	C. briggsae	ambient_temperature	25.6	4.997890236525907e-14
C-0803	S-05197	C. oiwi	ambient_temperature	24.9	4.997890236525907e-14
C-0846	S-05666	C. briggsae	ambient_temperature	27.4	4.997890236525907e-14
C-0878	S-05949	C. briggsae	ambient_temperature	24.4	4.997890236525907e-14
C-0905	S-06580	C. briggsae	ambient_temperature	23.6	4.997890236525907e-14
C-0913	S-06734	C. briggsae	ambient_temperature	26.7	4.997890236525907e-14
C-0921	S-05784	C. briggsae	ambient_temperature	25.666666666666668	4.997890236525907e-14
C-0923	S-05918	C. tropicalis	ambient_temperature	24.277777777777782	4.997890236525907e-14
C-0929	S-05958	C. briggsae	ambient_temperature	28.388888888888886	4.997890236525907e-14
C-0935	S-05703	C. briggsae	ambient_temperature	28.388888888888886	4.997890236525907e-14
C-0949	S-05772	C. briggsae	ambient_temperature	29.777777777777775	4.997890236525907e-14
C-0957	S-05770	C. briggsae	ambient_temperature	31.166666666666664	4.997890236525907e-14
C-0958	S-05741	C. briggsae	ambient_temperature	25.666666666666668	4.997890236525907e-14
C-0964	S-05736	C. briggsae	ambient_temperature	25.666666666666668	4.997890236525907e-14
C-0982	S-05954	C. briggsae	ambient_temperature	26.5	4.997890236525907e-14
C-0989	S-05794	C. tropicalis	ambient_temperature	31.5	4.997890236525907e-14
C-1000	S-05787	C. briggsae	ambient_temperature	27.055555555555557	4.997890236525907e-14
C-1002	S-05765	C. briggsae	ambient_temperature	26	4.997890236525907e-14
C-1004	S-05763	C. briggsae	ambient_temperature	26.33333333333334	4.997890236525907e-14
C-1018	S-05927	C. briggsae	ambient_temperature	28.8	4.997890236525907e-14
C-1019	S-05947	C. briggsae	ambient_temperature	28.8	4.997890236525907e-14
C-1026	S-05620	C. briggsae	ambient_temperature	23.3	4.997890236525907e-14
C-1029	S-05556	C. briggsae	ambient_temperature	24.9	4.997890236525907e-14
C-1031	S-05540	C. briggsae	ambient_temperature	24.7	4.997890236525907e-14
C-1032	S-05670	C. briggsae	ambient_temperature	25.7	4.997890236525907e-14
C-1033	S-05576	C. briggsae	ambient_temperature	27.7	4.997890236525907e-14
C-1041	S-05190	C. briggsae	ambient_temperature	24	4.997890236525907e-14
C-1042	S-05203	C. briggsae	ambient_temperature	24	4.997890236525907e-14
C-1044	S-07474	C. briggsae	ambient_temperature	24	4.997890236525907e-14
C-1047	S-05530	C. briggsae	ambient_temperature	24.7	4.997890236525907e-14
C-1073	S-05234	C. briggsae	ambient_temperature	26	4.997890236525907e-14
C-1074	S-05661	C. briggsae	ambient_temperature	26	4.997890236525907e-14
C-1079	S-05213	C. oiwi	ambient_temperature	25.3	4.997890236525907e-14
C-1083	S-05799	C. tropicalis	ambient_temperature	25.3	4.997890236525907e-14
C-1089	S-05709	C. briggsae	ambient_temperature	26.7	4.997890236525907e-14
C-1121	S-05732	C. briggsae	ambient_temperature	25.666666666666668	4.997890236525907e-14
C-1142	S-06560	C. elegans	ambient_temperature	19.2	4.997890236525907e-14
C-1175	S-05886	C. elegans	ambient_temperature	21.9	4.997890236525907e-14
C-1185	S-06607	C. briggsae	ambient_temperature	23.6	4.997890236525907e-14
C-1218	S-06745	C. briggsae	ambient_temperature	27	4.997890236525907e-14
C-1245	S-06621	C. tropicalis	ambient_temperature	27.7	4.997890236525907e-14
C-1329	S-06571	C. elegans	ambient_temperature	18.5	4.997890236525907e-14
C-1369	S-06654	C. briggsae	ambient_temperature	17.1	4.997890236525907e-14
C-1371	S-06647	C. briggsae	ambient_temperature	28.4	4.997890236525907e-14
C-1402	S-06897	C. briggsae	ambient_temperature	27.4	4.997890236525907e-14
C-1480	S-06857	C. elegans	ambient_temperature	24.9	4.997890236525907e-14
C-1489	S-06823	C. elegans	ambient_temperature	22.9	4.997890236525907e-14
C-1513	S-06906	C. briggsae	ambient_temperature	27	4.997890236525907e-14
C-2527	S-06740	C. briggsae	ambient_temperature	25.6	4.997890236525907e-14
C-2530	S-06892	C. briggsae	ambient_temperature	28.4	4.997890236525907e-14
C-2546	S-06869	C. briggsae	ambient_temperature	27	4.997890236525907e-14
C-2554	S-06950	C. briggsae	ambient_temperature	28.4	4.997890236525907e-14
C-2604	S-06898	C. briggsae	ambient_temperature	26.7	4.997890236525907e-14
C-2609	S-06673	C. briggsae	ambient_temperature	26.3	4.997890236525907e-14
C-2616	S-06772	C. briggsae	ambient_temperature	24.9	4.997890236525907e-14
C-2669	S-06337	C. briggsae	ambient_temperature	28.055555555555557	4.997890236525907e-14
C-2677	S-07052	C. elegans	ambient_temperature	23.333333333333336	4.997890236525907e-14
C-2720	S-07049	C. briggsae	ambient_temperature	24.66666666666667	4.997890236525907e-14
C-2735	S-06437	C. briggsae	ambient_temperature	24.66666666666667	4.997890236525907e-14
C-2756	S-07100	C. briggsae	ambient_temperature	24.66666666666667	4.997890236525907e-14
C-2767	S-06173	C. briggsae	ambient_temperature	26	4.997890236525907e-14
C-2772	S-06280	C. briggsae	ambient_temperature	27.4	4.997890236525907e-14
C-2794	S-06294	C. briggsae	ambient_temperature	23.3	4.997890236525907e-14
C-2805	S-06224	C. elegans	ambient_temperature	20.5	4.997890236525907e-14
C-2824	S-07420	C. elegans	ambient_temperature	22.6	4.997890236525907e-14
C-2827	S-06105	C. tropicalis	ambient_temperature	23.7	4.997890236525907e-14
C-2828	S-07315	C. elegans	ambient_temperature	22.6	4.997890236525907e-14
C-2830	S-07273	C. elegans	ambient_temperature	22.6	4.997890236525907e-14
C-2836	S-07228	C. elegans	ambient_temperature	22.6	4.997890236525907e-14
C-2840	S-07355	C. elegans	ambient_temperature	22.6	4.997890236525907e-14
C-2845	S-06039	C. briggsae	ambient_temperature	28.1	4.997890236525907e-14
C-2849	S-06145	C. briggsae	ambient_temperature	28.1	4.997890236525907e-14
C-2850	S-06013	C. briggsae	ambient_temperature	30.8	4.997890236525907e-14
C-2856	S-07368	C. elegans	ambient_temperature	21.9	4.997890236525907e-14
C-2857	S-06153	C. briggsae	ambient_temperature	28.8	4.997890236525907e-14
C-2857	S-06168	C. tropicalis	ambient_temperature	28.8	4.997890236525907e-14
C-2861	S-06001	C. briggsae	ambient_temperature	28.8	4.997890236525907e-14
C-2865	S-07097	C. elegans	ambient_temperature	21.9	4.997890236525907e-14
C-2879	S-07384	C. elegans	ambient_temperature	22.6	4.997890236525907e-14
C-2880	S-07225	C. elegans	ambient_temperature	22.6	4.997890236525907e-14
C-2906	S-05993	C. tropicalis	ambient_temperature	28.1	4.997890236525907e-14
C-2909	S-06150	C. tropicalis	ambient_temperature	27.4	4.997890236525907e-14
C-2915	S-06192	C. tropicalis	ambient_temperature	23.3	4.997890236525907e-14
C-2916	S-06055	C. briggsae	ambient_temperature	26	4.997890236525907e-14
C-3007	S-06241	C. elegans	ambient_temperature	23.3	4.997890236525907e-14
C-3028	S-06285	C. briggsae	ambient_temperature	26	4.997890236525907e-14
C-3031	S-06022	C. briggsae	ambient_temperature	26	4.997890236525907e-14
C-3043	S-06307	C. briggsae	ambient_temperature	27.4	4.997890236525907e-14
C-3058	S-06322	C. elegans	ambient_temperature	18.4	4.997890236525907e-14
C-3085	S-06213	C. elegans	ambient_temperature	18.5	4.997890236525907e-14
C-3093	S-05969	C. briggsae	ambient_temperature	26.7	4.997890236525907e-14
C-3096	S-06245	C. briggsae	ambient_temperature	23.333333333333336	4.997890236525907e-14
C-3097	S-06054	C. elegans	ambient_temperature	18.5	4.997890236525907e-14
C-3114	S-06174	C. elegans	ambient_temperature	22.6	4.997890236525907e-14
C-3133	S-05962	C. elegans	ambient_temperature	23.3	4.997890236525907e-14
C-3143	S-07541	C. elegans	ambient_temperature	22.6	4.997890236525907e-14
C-3151	S-07530	C. elegans	ambient_temperature	22.6	4.997890236525907e-14
C-3155	S-07385	C. elegans	ambient_temperature	NA	4.997890236525907e-14
C-3160	S-06096	C. elegans	ambient_temperature	23.3	4.997890236525907e-14
C-3164	S-05967	C. elegans	ambient_temperature	23.3	4.997890236525907e-14
C-3178	S-06046	C. elegans	ambient_temperature	21.9	4.997890236525907e-14
C-3189	S-07266	C. elegans	ambient_temperature	21.9	4.997890236525907e-14
C-3197	S-07305	C. elegans	ambient_temperature	23.3	4.997890236525907e-14
C-3201	S-07378	C. elegans	ambient_temperature	24	4.997890236525907e-14
C-3205	S-07424	C. elegans	ambient_temperature	23.3	4.997890236525907e-14
C-3264	S-06386	C. elegans	ambient_temperature	26	4.997890236525907e-14
C-3266	S-06383	C. elegans	ambient_temperature	25.388888888888893	4.997890236525907e-14
C-3267	S-07204	C. briggsae	ambient_temperature	24.7	4.997890236525907e-14
C-3270	S-07107	C. elegans	ambient_temperature	23.333333333333336	4.997890236525907e-14
C-3294	S-06373	C. elegans	ambient_temperature	19.9	4.997890236525907e-14
C-3525	S-07255	C. briggsae	ambient_temperature	27.4	4.997890236525907e-14
C-3533	S-07350	C. oiwi	ambient_temperature	27.4	4.997890236525907e-14
C-0029	S-05113	C. oiwi	altitude	98.8828125	7.789348573390319e-16
C-0037	S-05095	C. oiwi	altitude	87.86738351	7.789348573390319e-16
C-0047	S-05103	C. oiwi	altitude	99.87410072	7.789348573390319e-16
C-0053	S-05061	C. oiwi	altitude	313.2915767	7.789348573390319e-16
C-0055	S-05075	C. oiwi	altitude	311.9666269	7.789348573390319e-16
C-0065	S-05082	C. oiwi	altitude	322.8517588	7.789348573390319e-16
C-0065	S-05096	C. briggsae	altitude	322.8517588	7.789348573390319e-16
C-0072	S-05046	C. oiwi	altitude	317.37751	7.789348573390319e-16
C-0080	S-05074	C. tropicalis	altitude	238.1053391	7.789348573390319e-16
C-0084	S-05114	C. oiwi	altitude	168.5283019	7.789348573390319e-16
C-0085	S-05097	C. tropicalis	altitude	169.8389831	7.789348573390319e-16
C-0094	S-05047	C. briggsae	altitude	26.74621653	7.789348573390319e-16
C-0096	S-05049	C. briggsae	altitude	31.55212355	7.789348573390319e-16
C-0097	S-05035	C. briggsae	altitude	20.31085044	7.789348573390319e-16
C-0119	S-05171	C. briggsae	altitude	174.2420635	7.789348573390319e-16
C-0223	S-05274	C. briggsae	altitude	64.78546713	7.789348573390319e-16
C-0253	S-05580	C. briggsae	altitude	241.0691824	7.789348573390319e-16
C-0257	S-05637	C. oiwi	altitude	168.2667068	7.789348573390319e-16
C-0264	S-05581	C. briggsae	altitude	281.4824121	7.789348573390319e-16
C-0266	S-07467	C. briggsae	altitude	281.4052288	7.789348573390319e-16
C-0271	S-07483	C. briggsae	altitude	281.0586957	7.789348573390319e-16
C-0280	S-05575	C. briggsae	altitude	161.2611684	7.789348573390319e-16
C-0288	S-07481	C. briggsae	altitude	287.6963907	7.789348573390319e-16
C-0314	S-05944	C. briggsae	altitude	108.8898551	7.789348573390319e-16
C-0317	S-05937	C. briggsae	altitude	23.86257928	7.789348573390319e-16
C-0343	S-06610	C. briggsae	altitude	439.7731959	7.789348573390319e-16
C-0355	S-06521	C. briggsae	altitude	439.6501129	7.789348573390319e-16
C-0365	S-06558	C. elegans	altitude	1746.755319	7.789348573390319e-16
C-0376	S-06708	C. briggsae	altitude	295	7.789348573390319e-16
C-0380	S-06686	C. briggsae	altitude	291	7.789348573390319e-16
C-0380	S-06687	C. tropicalis	altitude	291	7.789348573390319e-16
C-0392	S-06770	C. briggsae	altitude	291	7.789348573390319e-16
C-0408	S-06719	C. briggsae	altitude	335	7.789348573390319e-16
C-0412	S-06751	C. briggsae	altitude	366	7.789348573390319e-16
C-0418	S-05793	C. briggsae	altitude	1165.131455	7.789348573390319e-16
C-0420	S-06715	C. tropicalis	altitude	389	7.789348573390319e-16
C-0421	S-05554	C. briggsae	altitude	301.0834512	7.789348573390319e-16
C-0433	S-05578	C. briggsae	altitude	344.4559271	7.789348573390319e-16
C-0442	S-05485	C. briggsae	altitude	294.7715232	7.789348573390319e-16
C-0666	S-05421	C. briggsae	altitude	1206.162162	7.789348573390319e-16
C-0736	S-06447	C. elegans	altitude	669	7.789348573390319e-16
C-0776	S-05566	C. briggsae	altitude	277.3657143	7.789348573390319e-16
C-0781	S-05631	C. briggsae	altitude	272.6848485	7.789348573390319e-16
C-0789	S-07468	C. briggsae	altitude	332.9986505	7.789348573390319e-16
C-0790	S-05647	C. briggsae	altitude	439.6529412	7.789348573390319e-16
C-0799	S-05512	C. briggsae	altitude	415.2389937	7.789348573390319e-16
C-0800	S-07503	C. briggsae	altitude	387.461039	7.789348573390319e-16
C-0803	S-05197	C. oiwi	altitude	181.7934272	7.789348573390319e-16
C-0846	S-05666	C. briggsae	altitude	201.2539062	7.789348573390319e-16
C-0878	S-05949	C. briggsae	altitude	40.05298651	7.789348573390319e-16
C-0905	S-06580	C. briggsae	altitude	388	7.789348573390319e-16
C-0913	S-06734	C. briggsae	altitude	86	7.789348573390319e-16
C-0921	S-05784	C. briggsae	altitude	198.68	7.789348573390319e-16
C-0923	S-05918	C. tropicalis	altitude	195.2614379	7.789348573390319e-16
C-0929	S-05958	C. briggsae	altitude	208.3816425	7.789348573390319e-16
C-0935	S-05703	C. briggsae	altitude	209.9708738	7.789348573390319e-16
C-0949	S-05772	C. briggsae	altitude	208.7173913	7.789348573390319e-16
C-0957	S-05770	C. briggsae	altitude	225.4597156	7.789348573390319e-16
C-0958	S-05741	C. briggsae	altitude	198.9180328	7.789348573390319e-16
C-0964	S-05736	C. briggsae	altitude	201.8410853	7.789348573390319e-16
C-0982	S-05954	C. briggsae	altitude	191.8259494	7.789348573390319e-16
C-0989	S-05794	C. tropicalis	altitude	94	7.789348573390319e-16
C-1000	S-05787	C. briggsae	altitude	200.0536585	7.789348573390319e-16
C-1002	S-05765	C. briggsae	altitude	189.630137	7.789348573390319e-16
C-1004	S-05763	C. briggsae	altitude	200.3820225	7.789348573390319e-16
C-1018	S-05927	C. briggsae	altitude	195.5997625	7.789348573390319e-16
C-1019	S-05947	C. briggsae	altitude	179.2134831	7.789348573390319e-16
C-1026	S-05620	C. briggsae	altitude	306.6197183	7.789348573390319e-16
C-1029	S-05556	C. briggsae	altitude	445.1217949	7.789348573390319e-16
C-1031	S-05540	C. briggsae	altitude	308.7732919	7.789348573390319e-16
C-1032	S-05670	C. briggsae	altitude	430.0989011	7.789348573390319e-16
C-1033	S-05576	C. briggsae	altitude	393.3017241	7.789348573390319e-16
C-1041	S-05190	C. briggsae	altitude	264.666975	7.789348573390319e-16
C-1042	S-05203	C. briggsae	altitude	278.7701149	7.789348573390319e-16
C-1044	S-07474	C. briggsae	altitude	266.1755319	7.789348573390319e-16
C-1047	S-05530	C. briggsae	altitude	260.9348659	7.789348573390319e-16
C-1073	S-05234	C. briggsae	altitude	219	7.789348573390319e-16
C-1074	S-05661	C. briggsae	altitude	209.9795918	7.789348573390319e-16
C-1079	S-05213	C. oiwi	altitude	166.6885965	7.789348573390319e-16
C-1083	S-05799	C. tropicalis	altitude	215.9588235	7.789348573390319e-16
C-1089	S-05709	C. briggsae	altitude	193.4864865	7.789348573390319e-16
C-1121	S-05732	C. briggsae	altitude	198.4620253	7.789348573390319e-16
C-1142	S-06560	C. elegans	altitude	1778.986667	7.789348573390319e-16
C-1175	S-05886	C. elegans	altitude	1163.896104	7.789348573390319e-16
C-1185	S-06607	C. briggsae	altitude	458	7.789348573390319e-16
C-1218	S-06745	C. briggsae	altitude	92	7.789348573390319e-16
C-1245	S-06621	C. tropicalis	altitude	92	7.789348573390319e-16
C-1329	S-06571	C. elegans	altitude	1724.617647	7.789348573390319e-16
C-1369	S-06654	C. briggsae	altitude	1670.086207	7.789348573390319e-16
C-1371	S-06647	C. briggsae	altitude	151	7.789348573390319e-16
C-1402	S-06897	C. briggsae	altitude	131.7296417	7.789348573390319e-16
C-1480	S-06857	C. elegans	altitude	1043	7.789348573390319e-16
C-1489	S-06823	C. elegans	altitude	1170	7.789348573390319e-16
C-1513	S-06906	C. briggsae	altitude	106	7.789348573390319e-16
C-2527	S-06740	C. briggsae	altitude	200.1682692	7.789348573390319e-16
C-2530	S-06892	C. briggsae	altitude	51	7.789348573390319e-16
C-2546	S-06869	C. briggsae	altitude	9	7.789348573390319e-16
C-2554	S-06950	C. briggsae	altitude	45	7.789348573390319e-16
C-2604	S-06898	C. briggsae	altitude	103.5895652	7.789348573390319e-16
C-2609	S-06673	C. briggsae	altitude	393	7.789348573390319e-16
C-2616	S-06772	C. briggsae	altitude	415	7.789348573390319e-16
C-2669	S-06337	C. briggsae	altitude	334.0555556	7.789348573390319e-16
C-2677	S-07052	C. elegans	altitude	992.3670886	7.789348573390319e-16
C-2720	S-07049	C. briggsae	altitude	439.01	7.789348573390319e-16
C-2735	S-06437	C. briggsae	altitude	449.4651163	7.789348573390319e-16
C-2756	S-07100	C. briggsae	altitude	463.9475138	7.789348573390319e-16
C-2767	S-06173	C. briggsae	altitude	44.01602564	7.789348573390319e-16
C-2772	S-06280	C. briggsae	altitude	38.60953177	7.789348573390319e-16
C-2794	S-06294	C. briggsae	altitude	1217.810651	7.789348573390319e-16
C-2805	S-06224	C. elegans	altitude	1114.484375	7.789348573390319e-16
C-2824	S-07420	C. elegans	altitude	670.8930041	7.789348573390319e-16
C-2827	S-06105	C. tropicalis	altitude	244.69	7.789348573390319e-16
C-2828	S-07315	C. elegans	altitude	670.8197674	7.789348573390319e-16
C-2830	S-07273	C. elegans	altitude	670.543379	7.789348573390319e-16
C-2836	S-07228	C. elegans	altitude	670.7331461	7.789348573390319e-16
C-2840	S-07355	C. elegans	altitude	670.6117647	7.789348573390319e-16
C-2845	S-06039	C. briggsae	altitude	238.1446281	7.789348573390319e-16
C-2849	S-06145	C. briggsae	altitude	244.5239295	7.789348573390319e-16
C-2850	S-06013	C. briggsae	altitude	140.315534	7.789348573390319e-16
C-2856	S-07368	C. elegans	altitude	669.971831	7.789348573390319e-16
C-2857	S-06153	C. briggsae	altitude	246.0480769	7.789348573390319e-16
C-2857	S-06168	C. tropicalis	altitude	246.0480769	7.789348573390319e-16
C-2861	S-06001	C. briggsae	altitude	245.753012	7.789348573390319e-16
C-2865	S-07097	C. elegans	altitude	789.2913386	7.789348573390319e-16
C-2879	S-07384	C. elegans	altitude	671.08125	7.789348573390319e-16
C-2880	S-07225	C. elegans	altitude	669.9975	7.789348573390319e-16
C-2906	S-05993	C. tropicalis	altitude	101.6706349	7.789348573390319e-16
C-2909	S-06150	C. tropicalis	altitude	88.96017699	7.789348573390319e-16
C-2915	S-06192	C. tropicalis	altitude	101.7170732	7.789348573390319e-16
C-2916	S-06055	C. briggsae	altitude	90.12869565	7.789348573390319e-16
C-3007	S-06241	C. elegans	altitude	1206.792793	7.789348573390319e-16
C-3028	S-06285	C. briggsae	altitude	247.4792627	7.789348573390319e-16
C-3031	S-06022	C. briggsae	altitude	246.6155462	7.789348573390319e-16
C-3043	S-06307	C. briggsae	altitude	1210.321244	7.789348573390319e-16
C-3058	S-06322	C. elegans	altitude	1121.234234	7.789348573390319e-16
C-3085	S-06213	C. elegans	altitude	1119.574468	7.789348573390319e-16
C-3093	S-05969	C. briggsae	altitude	244.5700483	7.789348573390319e-16
C-3096	S-06245	C. briggsae	altitude	1146.177083	7.789348573390319e-16
C-3097	S-06054	C. elegans	altitude	1119.876923	7.789348573390319e-16
C-3114	S-06174	C. elegans	altitude	655.1933333	7.789348573390319e-16
C-3133	S-05962	C. elegans	altitude	649.9944751	7.789348573390319e-16
C-3143	S-07541	C. elegans	altitude	655.4961832	7.789348573390319e-16
C-3151	S-07530	C. elegans	altitude	656.5362319	7.789348573390319e-16
C-3155	S-07385	C. elegans	altitude	655.4036697	7.789348573390319e-16
C-3160	S-06096	C. elegans	altitude	685.5014663	7.789348573390319e-16
C-3164	S-05967	C. elegans	altitude	667.7007299	7.789348573390319e-16
C-3178	S-06046	C. elegans	altitude	656.3305085	7.789348573390319e-16
C-3189	S-07266	C. elegans	altitude	653.640118	7.789348573390319e-16
C-3197	S-07305	C. elegans	altitude	651.980315	7.789348573390319e-16
C-3201	S-07378	C. elegans	altitude	649.3469388	7.789348573390319e-16
C-3205	S-07424	C. elegans	altitude	648.3991416	7.789348573390319e-16
C-3264	S-06386	C. elegans	altitude	655.7813765	7.789348573390319e-16
C-3266	S-06383	C. elegans	altitude	651.7065217	7.789348573390319e-16
C-3267	S-07204	C. briggsae	altitude	673.8686869	7.789348573390319e-16
C-3270	S-07107	C. elegans	altitude	640.3041958	7.789348573390319e-16
C-3294	S-06373	C. elegans	altitude	1010.408602	7.789348573390319e-16
C-3525	S-07255	C. briggsae	altitude	102.5587847	7.789348573390319e-16
C-3533	S-07350	C. oiwi	altitude	109.8398693	7.789348573390319e-16
