# Supplementary material for: Deep sampling of Hawaiian Caenorhabditis elegans reveals high genetic diversity and admixture with global populations
Source: eLife journal article supplement (doi:10.7554/elife.50465), 2019-12-03
Supplement: supp [file elife-50465-supp-v1.zip › elife_poa_e50465_Figure_3_source_data_2.csv]

x	y	pearson_correlation
altitude	substrate_temperature	-0.8104600933946831
altitude	substrate_moisture	0.12407988991874566
altitude	ambient_humidity	0.20163805551693492
altitude	ambient_temperature	-0.7206455666659823
ambient_humidity	substrate_temperature	-0.41168435513762985
ambient_humidity	substrate_moisture	0.27210425433667806
ambient_temperature	substrate_temperature	0.8105251574970693
ambient_temperature	substrate_moisture	-0.2284680352860203
ambient_temperature	ambient_humidity	-0.6737237352250858
substrate_moisture	substrate_temperature	-0.12163402319609506
