# Supplementary material for: Deep sampling of Hawaiian Caenorhabditis elegans reveals high genetic diversity and admixture with global populations
Source: eLife journal article supplement (doi:10.7554/elife.50465), 2019-12-03
Supplement: supp [file elife-50465-supp-v1.zip › elife_poa_e50465_Figure_4_source_data_1.csv]

snp_index	position	Diversity_Hawaiian-population	Diversity_non-Hawaiian_population	CHROM	Fst
25	6313	6.61E-04	2.07E-04	I	0.342267792
30	6434	7.94E-04	2.52E-04	I	0.332173172
36	7995	9.65E-04	2.61E-04	I	0.322553623
40	8241	0.001072941	2.80E-04	I	0.324644593
51	10347	0.00105368	2.92E-04	I	0.304115236
63	11124	9.20E-04	3.30E-04	I	0.292231042
66	11513	9.29E-04	4.11E-04	I	0.285730904
70	11828	9.20E-04	3.26E-04	I	0.287585965
77	12921	8.90E-04	3.49E-04	I	0.262089001
88	13587	7.83E-04	3.04E-04	I	0.22419092
93	13922	8.47E-04	3.04E-04	I	0.236543438
98	14258	7.13E-04	2.58E-04	I	0.228270281
108	15472	6.45E-04	2.62E-04	I	0.224716766
114	17605	6.12E-04	2.99E-04	I	0.200688404
122	18314	5.16E-04	2.41E-04	I	0.216043663
128	18896	4.71E-04	2.06E-04	I	0.223522832
136	19763	5.87E-04	1.79E-04	I	0.230044995
141	21741	6.82E-04	2.66E-04	I	0.240281036
150	22764	6.93E-04	2.99E-04	I	0.249850839
162	25865	7.02E-04	2.99E-04	I	0.24835001
169	26518	6.60E-04	3.07E-04	I	0.231482042
174	27024	7.32E-04	4.41E-04	I	0.215320254
178	27491	6.29E-04	4.30E-04	I	0.210784349
186	28502	6.15E-04	4.66E-04	I	0.210493615
189	28736	6.45E-04	4.76E-04	I	0.205223648
190	28868	6.41E-04	4.62E-04	I	0.207437714
195	29180	5.16E-04	4.08E-04	I	0.202628378
200	29831	4.21E-04	3.21E-04	I	0.180864659
204	30213	2.92E-04	2.57E-04	I	0.140090939
210	30671	2.37E-04	2.51E-04	I	0.153005466
213	32041	1.64E-04	2.38E-04	I	0.147345521
221	32927	1.39E-04	1.42E-04	I	0.184003033
232	41044	4.06E-04	2.31E-04	I	0.228420525
241	41669	4.46E-04	1.45E-04	I	0.249652194
254	42150	7.10E-04	2.84E-04	I	0.25159482
259	42551	8.21E-04	3.90E-04	I	0.259779753
266	43315	9.31E-04	4.25E-04	I	0.247714249
272	43567	0.001085417	4.77E-04	I	0.255116781
275	43806	0.001141669	5.62E-04	I	0.246110175
277	43920	0.001176689	5.66E-04	I	0.242618698
277	43920	0.001176689	5.66E-04	I	0.242618698
280	43967	0.001128974	5.28E-04	I	0.243580895
290	44811	8.62E-04	4.37E-04	I	0.239143881
294	45163	7.61E-04	4.32E-04	I	0.233284541
305	45957	4.67E-04	2.82E-04	I	0.230379501
310	46354	3.56E-04	1.75E-04	I	0.200388825
317	46978	2.45E-04	1.41E-04	I	0.224146865
323	47909	9.13E-05	8.86E-05	I	0.113375088
334	57285	2.20E-04	1.05E-04	I	0.200791574
337	57344	1.85E-04	1.03E-04	I	0.216756023
342	57495	2.48E-04	1.48E-04	I	0.195154498
348	59440	3.81E-04	1.89E-04	I	0.21806022
354	59755	4.47E-04	2.05E-04	I	0.200062622
365	60512	6.91E-04	3.09E-04	I	0.208012653
370	61433	8.05E-04	3.24E-04	I	0.205986691
378	61766	9.34E-04	3.85E-04	I	0.223369988
381	62031	9.65E-04	4.29E-04	I	0.22080613
381	62031	9.70E-04	4.29E-04	I	0.22026409
398	62740	9.56E-04	5.05E-04	I	0.198138737
403	63061	0.001110369	5.65E-04	I	0.215747108
417	64166	0.001179316	5.73E-04	I	0.215274916
429	65187	0.001281094	6.74E-04	I	0.222503489
441	67379	0.001373023	7.21E-04	I	0.236527784
456	68353	0.001220027	7.01E-04	I	0.237468357
463	69122	0.001111245	6.89E-04	I	0.239952927
472	69639	0.001067469	6.32E-04	I	0.231008951
478	70153	0.001108618	5.92E-04	I	0.237131543
485	70902	0.001343475	6.45E-04	I	0.24221903
496	71354	0.001262052	4.78E-04	I	0.261580222
506	72615	0.001201423	4.64E-04	I	0.237036955
515	74821	0.001078632	4.10E-04	I	0.244335768
528	76325	0.001075349	2.84E-04	I	0.226095871
537	77111	9.96E-04	2.28E-04	I	0.207866944
548	78554	0.001041423	2.44E-04	I	0.198051878
555	80132	0.001148892	3.29E-04	I	0.202179234
558	80163	0.001141231	3.27E-04	I	0.206672269
561	80308	0.00106922	3.23E-04	I	0.200342417
568	81373	8.30E-04	2.70E-04	I	0.180212814
576	82313	9.06E-04	2.67E-04	I	0.186977019
588	83074	8.94E-04	2.45E-04	I	0.210198747
590	83173	9.16E-04	2.48E-04	I	0.206958276
600	87209	7.74E-04	2.87E-04	I	0.224980967
607	87477	7.53E-04	3.75E-04	I	0.228490029
618	88318	6.89E-04	3.66E-04	I	0.246300683
627	89215	6.80E-04	3.28E-04	I	0.257876928
628	89511	6.02E-04	3.26E-04	I	0.252515754
630	90534	6.45E-04	3.27E-04	I	0.251272511
634	90937	6.77E-04	3.50E-04	I	0.241956686
641	91996	5.64E-04	3.44E-04	I	0.25214163
651	93247	5.45E-04	3.64E-04	I	0.253444171
658	95388	6.83E-04	3.90E-04	I	0.254085264
664	96615	6.50E-04	3.40E-04	I	0.244814845
668	96942	5.93E-04	2.45E-04	I	0.248857987
674	98384	5.61E-04	1.53E-04	I	0.239406506
682	99311	5.64E-04	1.87E-04	I	0.251371205
682	99311	5.64E-04	1.87E-04	I	0.251371205
691	100180	7.81E-04	2.77E-04	I	0.253512746
697	102798	7.75E-04	2.56E-04	I	0.258290979
702	103570	8.65E-04	3.04E-04	I	0.25610377
711	105242	9.76E-04	5.64E-04	I	0.25584089
717	105408	8.07E-04	5.36E-04	I	0.259900386
720	105652	7.50E-04	5.31E-04	I	0.261774358
720	105652	7.50E-04	5.31E-04	I	0.261774358
722	105946	7.08E-04	5.31E-04	I	0.266584444
730	107680	7.33E-04	4.96E-04	I	0.236421158
733	107937	7.86E-04	4.99E-04	I	0.234522168
749	113046	6.50E-04	4.69E-04	I	0.204316778
753	113766	6.62E-04	5.14E-04	I	0.219309565
762	115012	5.84E-04	5.07E-04	I	0.205261378
773	115737	4.61E-04	2.44E-04	I	0.15906332
778	116216	6.06E-04	2.89E-04	I	0.199983201
781	116720	6.96E-04	3.76E-04	I	0.215873573
786	117596	7.41E-04	5.17E-04	I	0.208721066
794	118149	8.44E-04	6.58E-04	I	0.212304663
803	119486	8.00E-04	6.26E-04	I	0.230295555
811	120461	8.62E-04	6.69E-04	I	0.228913794
824	121702	9.58E-04	6.27E-04	I	0.253869466
834	122566	0.001010123	6.77E-04	I	0.231663491
844	123411	0.001052148	6.38E-04	I	0.233891818
853	124196	0.001080602	6.07E-04	I	0.234694398
864	125107	0.001077538	5.69E-04	I	0.225188431
872	125780	0.00100093	5.47E-04	I	0.214072774
883	126782	0.00105171	4.12E-04	I	0.225654002
892	127307	9.62E-04	3.12E-04	I	0.223961688
901	128162	9.32E-04	3.00E-04	I	0.215728055
916	129807	0.001001368	3.57E-04	I	0.224149047
923	130317	8.23E-04	3.38E-04	I	0.20867921
937	131552	9.42E-04	3.43E-04	I	0.233273976
946	133164	9.59E-04	4.70E-04	I	0.231538874
949	133561	8.81E-04	4.59E-04	I	0.236190143
962	134948	7.90E-04	4.55E-04	I	0.226080129
972	135455	9.52E-04	4.43E-04	I	0.231753204
983	136733	9.23E-04	5.41E-04	I	0.217086742
991	137729	9.96E-04	5.27E-04	I	0.222239911
998	139393	9.71E-04	5.82E-04	I	0.219802233
1014	140839	8.94E-04	5.49E-04	I	0.210105562
1018	141239	8.83E-04	5.49E-04	I	0.206207842
1031	142471	8.28E-04	5.23E-04	I	0.206899862
1036	142793	7.25E-04	4.37E-04	I	0.199522876
1042	143776	8.72E-04	4.98E-04	I	0.207988915
1049	144255	8.39E-04	4.96E-04	I	0.21193754
1059	145389	6.95E-04	4.85E-04	I	0.203764575
1065	146273	6.37E-04	3.81E-04	I	0.212697655
1073	146963	6.15E-04	3.56E-04	I	0.219463284
1083	148526	7.53E-04	3.52E-04	I	0.246561364
1097	150276	7.92E-04	3.45E-04	I	0.244373263
1103	151494	7.98E-04	3.95E-04	I	0.244151699
1114	153705	7.21E-04	3.37E-04	I	0.226626373
1120	153999	7.71E-04	2.96E-04	I	0.236952997
1131	154584	7.50E-04	2.85E-04	I	0.252766397
1138	155058	8.00E-04	3.31E-04	I	0.236191008
1146	156353	8.45E-04	3.34E-04	I	0.248902182
1151	156504	9.01E-04	4.01E-04	I	0.242858915
1155	157099	8.84E-04	4.84E-04	I	0.241098727
1162	158156	7.48E-04	4.73E-04	I	0.235047812
1175	159595	6.40E-04	4.26E-04	I	0.236142342
1184	160036	8.38E-04	4.36E-04	I	0.259499834
1199	162004	9.93E-04	4.35E-04	I	0.282281145
1204	164093	9.42E-04	4.32E-04	I	0.278089808
1209	164747	8.16E-04	3.82E-04	I	0.268794859
1219	165724	8.59E-04	4.25E-04	I	0.283917479
1229	166131	8.17E-04	4.27E-04	I	0.273308606
1237	166660	7.97E-04	3.85E-04	I	0.272884889
1246	167847	9.86E-04	4.40E-04	I	0.264497258
1250	169033	0.00106156	3.98E-04	I	0.253227142
1258	170088	0.001052367	3.82E-04	I	0.256336434
1271	171226	9.98E-04	4.94E-04	I	0.242096705
1289	172994	9.71E-04	6.22E-04	I	0.222861992
1296	173644	0.001229439	6.78E-04	I	0.23233731
1303	174602	0.001435404	8.14E-04	I	0.235998119
1309	175459	0.001338878	7.22E-04	I	0.233130507
1320	176469	0.001402353	6.84E-04	I	0.259865618
1329	176643	0.001412421	7.07E-04	I	0.261355339
1336	177241	0.001176252	5.67E-04	I	0.263083626
1340	177374	0.001067469	5.66E-04	I	0.267393922
1343	177685	0.001040109	5.65E-04	I	0.270639956
1350	178386	8.68E-04	3.93E-04	I	0.275198772
1358	178724	6.64E-04	2.49E-04	I	0.29410083
1365	180066	3.83E-04	1.92E-04	I	0.309859877
1375	181115	3.10E-04	6.01E-05	I	0.377177528
1382	181553	3.54E-04	6.27E-05	I	0.351324991
1394	189191	3.14E-04	7.56E-05	I	0.2155829
1404	190396	3.62E-04	1.24E-04	I	0.217075389
1409	190634	5.24E-04	1.38E-04	I	0.233439768
1413	190961	5.99E-04	1.49E-04	I	0.225417575
1420	191432	6.91E-04	1.60E-04	I	0.215922838
1423	191653	7.30E-04	1.60E-04	I	0.214140745
1424	191770	7.79E-04	1.71E-04	I	0.225121753
1427	192133	8.84E-04	1.78E-04	I	0.252227846
1431	192291	7.56E-04	1.75E-04	I	0.228243656
1436	192739	6.98E-04	1.72E-04	I	0.239068396
1444	193931	6.39E-04	1.50E-04	I	0.255858674
1449	194290	5.35E-04	5.38E-05	I	0.27524047
1454	194492	3.73E-04	4.04E-05	I	0.275156648
1458	194990	2.99E-04	2.86E-05	I	0.300755507
1465	196847	2.06E-04	1.84E-05	I	0.356097222
1468	197284	1.59E-04	1.76E-05	I	0.395906383
1469	197883	1.10E-04	6.83E-06	I	0.413597503
1472	198017	4.60E-06	0	I	0.011764706
1476	221905	7.22E-05	4.36E-05	I	0.289026378
1481	222020	2.30E-04	9.15E-05	I	0.291894311
1482	222276	2.39E-04	1.04E-04	I	0.280685025
1482	222276	2.39E-04	1.04E-04	I	0.280685025
1482	222276	2.39E-04	1.04E-04	I	0.280685025
1483	222462	2.39E-04	1.07E-04	I	0.278708144
1485	222782	2.94E-04	1.51E-04	I	0.230652045
1486	222875	2.99E-04	1.52E-04	I	0.228574359
1487	222878	3.04E-04	1.53E-04	I	0.226535483
1488	222902	3.08E-04	1.54E-04	I	0.224534338
1492	226353	2.36E-04	1.10E-04	I	0.200234845
1497	227536	7.79E-05	6.20E-05	I	0.007464347
1498	227548	6.89E-05	5.08E-05	I	-6.42E-04
1498	227548	6.89E-05	5.08E-05	I	-6.42E-04
1499	228816	7.81E-05	5.08E-05	I	2.52E-04
1502	229180	8.73E-05	4.83E-05	I	9.51E-04
1507	235996	5.06E-05	5.14E-06	I	0.010885424
1508	236138	4.60E-05	4.28E-06	I	0.010952507
1511	237126	1.04E-04	1.67E-05	I	0.221454502
1516	239263	1.89E-04	6.12E-05	I	0.249069076
1523	240585	3.37E-04	6.71E-05	I	0.24570259
1523	240585	3.42E-04	6.71E-05	I	0.243690648
1524	240739	3.42E-04	6.63E-05	I	0.244074627
1524	240739	3.42E-04	6.63E-05	I	0.244074627
1525	240877	3.33E-04	6.63E-05	I	0.24814702
1526	240912	3.24E-04	6.54E-05	I	0.25277738
1529	241151	3.05E-04	6.46E-05	I	0.26215627
1529	241151	3.05E-04	6.46E-05	I	0.26215627
1531	241582	2.42E-04	5.13E-05	I	0.249230606
1535	241751	1.53E-04	5.97E-06	I	0.235091872
1542	242051	4.60E-06	0	I	0.011764706
1543	256948	4.60E-06	3.70E-05	I	0.222936114
1549	257524	1.39E-04	9.57E-05	I	0.286203365
1554	257866	2.45E-04	1.61E-04	I	0.308342729
1560	258406	4.11E-04	2.20E-04	I	0.294218575
1566	259097	6.02E-04	2.70E-04	I	0.280383779
1567	259268	6.11E-04	3.49E-04	I	0.275912102
1574	259706	7.19E-04	4.43E-04	I	0.259032952
1579	260238	7.84E-04	4.49E-04	I	0.249932846
1584	260656	9.53E-04	4.82E-04	I	0.239087027
1591	261974	0.001079945	5.32E-04	I	0.238910452
1596	262330	0.001149767	5.03E-04	I	0.234903402
1605	262933	0.001108181	5.11E-04	I	0.240165869
1613	263722	0.001044706	5.70E-04	I	0.234714896
1623	264880	0.001021724	5.17E-04	I	0.226384413
1631	265326	9.28E-04	4.81E-04	I	0.234007248
1635	265409	9.96E-04	4.06E-04	I	0.231925539
1649	267524	0.001091327	4.08E-04	I	0.252181797
1658	268285	0.001078413	4.13E-04	I	0.256284146
1666	269843	0.001011655	3.86E-04	I	0.270859372
1673	270383	8.84E-04	3.35E-04	I	0.275487004
1677	271983	8.10E-04	3.28E-04	I	0.283666251
1680	272118	7.17E-04	2.61E-04	I	0.271216492
1684	272242	7.24E-04	1.75E-04	I	0.273495857
1696	273350	7.27E-04	2.32E-04	I	0.26743164
1701	274024	6.96E-04	2.95E-04	I	0.234313131
1703	274133	6.19E-04	2.92E-04	I	0.23809388
1712	279183	4.63E-04	1.98E-04	I	0.212781178
1719	279495	4.46E-04	1.99E-04	I	0.20672221
1726	280155	4.47E-04	2.89E-04	I	0.20211895
1728	280420	4.89E-04	2.91E-04	I	0.199860034
1734	283358	5.22E-04	3.07E-04	I	0.190856348
1737	283686	5.53E-04	3.16E-04	I	0.184350706
1742	284634	5.61E-04	2.80E-04	I	0.154655246
1753	286235	4.47E-04	2.36E-04	I	0.135142101
1758	286764	4.28E-04	1.69E-04	I	0.159271336
1758	286764	4.32E-04	1.69E-04	I	0.158311708
1766	287862	5.68E-04	1.76E-04	I	0.165816415
1778	289807	7.57E-04	3.04E-04	I	0.184270356
1787	290861	7.43E-04	2.10E-04	I	0.166665126
1793	292536	8.02E-04	2.14E-04	I	0.185955549
1804	293066	9.34E-04	2.46E-04	I	0.207531703
1811	293416	9.71E-04	2.40E-04	I	0.205741863
1818	293862	9.62E-04	3.26E-04	I	0.210518974
1826	294687	0.00100684	3.97E-04	I	0.223652569
1836	296008	0.001113653	4.85E-04	I	0.235946581
1840	296520	0.001210834	4.91E-04	I	0.2402755
1851	297556	0.00121171	5.80E-04	I	0.248406533
1860	298719	9.88E-04	4.40E-04	I	0.258588583
1864	299670	8.99E-04	4.38E-04	I	0.265604658
1868	299829	7.98E-04	4.32E-04	I	0.260668344
1873	300185	6.34E-04	3.84E-04	I	0.259255222
1877	300349	5.66E-04	3.82E-04	I	0.270213895
1881	300559	5.17E-04	2.92E-04	I	0.282377043
1885	301043	4.40E-04	2.04E-04	I	0.284745204
1892	302045	2.86E-04	1.04E-04	I	0.277867258
1896	302223	1.84E-04	9.73E-05	I	0.272119109
1903	318242	3.15E-05	2.56E-06	I	0.025530631
1906	319392	5.91E-05	2.56E-06	I	0.019421182
1910	319648	7.75E-05	6.84E-06	I	0.016896392
1912	320199	9.59E-05	1.89E-05	I	0.016049676
1914	320480	1.60E-04	2.06E-05	I	0.193742085
1921	321201	2.63E-04	1.11E-04	I	0.218299069
1924	321873	2.80E-04	1.19E-04	I	0.208554265
1928	323085	3.03E-04	1.25E-04	I	0.198423424
1928	323085	3.08E-04	1.25E-04	I	0.196810478
1929	323118	3.08E-04	1.25E-04	I	0.196500544
1932	323385	2.81E-04	1.23E-04	I	0.20656394
1936	323776	2.58E-04	1.36E-04	I	0.211567475
1946	324437	3.47E-04	1.47E-04	I	0.209457524
1949	325326	3.29E-04	1.36E-04	I	0.219310896
1955	325869	2.97E-04	1.40E-04	I	0.170334429
1965	330276	3.06E-04	5.77E-05	I	0.157225786
1969	330686	2.97E-04	5.09E-05	I	0.16120233
1975	332418	2.88E-04	8.69E-05	I	0.176374086
1978	332683	3.34E-04	8.77E-05	I	0.168972838
1982	332975	3.61E-04	1.08E-04	I	0.156563479
1984	333447	4.50E-04	1.11E-04	I	0.167379626
1986	333576	4.46E-04	9.78E-05	I	0.170763743
1991	334523	3.38E-04	8.20E-05	I	0.170469967
1994	335966	4.47E-04	1.26E-04	I	0.176895522
2003	337228	4.61E-04	1.31E-04	I	0.172900003
2009	338157	3.58E-04	1.25E-04	I	0.148761831
2011	341513	3.49E-04	1.25E-04	I	0.151259685
2014	341821	3.94E-04	8.52E-05	I	0.188764058
2021	342372	3.82E-04	8.95E-05	I	0.189037169
2031	345604	5.10E-04	8.97E-05	I	0.202621214
2038	346746	4.98E-04	2.11E-04	I	0.218993377
2040	346820	5.50E-04	2.23E-04	I	0.215469563
2044	347222	5.82E-04	2.37E-04	I	0.206534244
2050	347532	5.00E-04	2.05E-04	I	0.200515629
2057	348226	5.13E-04	2.08E-04	I	0.206987584
2063	348635	5.54E-04	2.04E-04	I	0.20002541
2066	349475	5.59E-04	2.19E-04	I	0.196771636
2069	349691	5.13E-04	2.18E-04	I	0.169997211
2076	350339	5.11E-04	2.13E-04	I	0.168541956
2084	351875	3.57E-04	1.92E-04	I	0.158304908
2089	352921	2.74E-04	6.89E-05	I	0.082658329
2094	353573	2.85E-04	6.11E-05	I	0.127972597
2100	354185	2.57E-04	1.30E-04	I	0.176161756
2105	355422	2.57E-04	1.23E-04	I	0.178129432
2107	356486	1.99E-04	1.11E-04	I	0.184950584
2111	356925	1.49E-04	1.11E-04	I	0.209242597
2114	359794	1.44E-04	9.56E-05	I	0.220658434
2115	359863	1.31E-04	9.47E-05	I	0.230501559
2118	360173	9.43E-05	9.47E-05	I	0.260615998
2118	360173	9.43E-05	9.47E-05	I	0.260615998
2119	360610	9.43E-05	9.39E-05	I	0.261486456
2121	360943	3.15E-05	8.96E-05	I	0.215122545
2124	361590	3.15E-05	7.50E-06	I	0.007752081
2127	370772	4.60E-06	1.71E-06	I	0.009172798
2129	372008	2.74E-05	1.71E-06	I	0.018596166
2131	372276	7.27E-05	5.12E-06	I	0.124665829
2131	372276	7.27E-05	5.12E-06	I	0.124665829
2131	372276	7.27E-05	5.12E-06	I	0.124665829
2132	372384	7.73E-05	5.12E-06	I	0.119050896
2136	373562	2.67E-04	8.36E-05	I	0.143419326
2138	376921	3.35E-04	8.70E-05	I	0.185924206
2140	377467	4.42E-04	1.43E-04	I	0.180119874
2142	377573	4.96E-04	1.55E-04	I	0.202599917
2147	377706	5.37E-04	1.55E-04	I	0.193555727
2158	381234	7.56E-04	2.56E-04	I	0.230086401
2163	381932	7.64E-04	2.61E-04	I	0.222790915
2168	382137	8.43E-04	2.67E-04	I	0.218881623
2170	382151	9.05E-04	2.68E-04	I	0.224874823
2173	382224	9.24E-04	2.68E-04	I	0.22243119
2178	382633	7.43E-04	1.90E-04	I	0.239337164
2180	382686	6.75E-04	1.86E-04	I	0.228953965
2190	384405	7.63E-04	2.36E-04	I	0.201730615
2198	384889	8.72E-04	3.33E-04	I	0.185225621
2208	387196	9.90E-04	3.80E-04	I	0.207290551
2216	389216	7.49E-04	2.80E-04	I	0.177346657
2219	389315	6.96E-04	2.72E-04	I	0.185259377
2226	390021	6.71E-04	2.66E-04	I	0.185676485
2235	390799	7.98E-04	4.53E-04	I	0.169415389
2245	391300	9.19E-04	4.59E-04	I	0.171883687
2250	394791	0.001007497	4.72E-04	I	0.1706663
2260	395417	0.001373023	4.86E-04	I	0.197397919
2269	396195	0.001204706	3.81E-04	I	0.213224122
2276	396699	0.001036607	2.70E-04	I	0.221125514
2281	396949	8.77E-04	2.22E-04	I	0.206352421
2286	397406	9.78E-04	2.26E-04	I	0.197387772
2293	398165	0.001166402	2.28E-04	I	0.19156335
2298	398483	0.001202298	2.88E-04	I	0.190066038
2308	398733	0.001035951	9.96E-05	I	0.197128343
2323	402933	0.001023475	9.70E-05	I	0.190876107
2330	403404	9.35E-04	9.22E-05	I	0.193154988
2343	404774	6.24E-04	8.02E-05	I	0.122104661
2352	406610	7.26E-04	8.79E-05	I	0.14944807
2361	406894	9.09E-04	9.65E-05	I	0.165283538
2363	406944	9.74E-04	1.01E-04	I	0.16815918
2371	408325	9.27E-04	1.40E-04	I	0.17284095
2390	409963	9.91E-04	2.16E-04	I	0.162586783
2396	410406	9.28E-04	1.56E-04	I	0.158720499
2400	410732	9.10E-04	1.55E-04	I	0.160980107
2411	411864	8.53E-04	1.67E-04	I	0.161680758
2419	412974	0.001067469	2.29E-04	I	0.158146314
2429	413307	0.001148673	4.40E-04	I	0.162521705
2438	413887	0.0010342	4.32E-04	I	0.151703175
2448	414170	8.78E-04	4.26E-04	I	0.139021248
2453	416665	9.14E-04	5.11E-04	I	0.129179936
2461	417436	9.09E-04	5.56E-04	I	0.130480492
2482	418877	8.93E-04	5.27E-04	I	0.141881351
2490	421377	9.49E-04	6.56E-04	I	0.146991969
2495	422023	0.001107305	7.14E-04	I	0.157520317
2506	423073	0.001304295	7.28E-04	I	0.169357707
2517	423585	0.001125253	6.71E-04	I	0.170666162
2528	424788	0.00106725	5.00E-04	I	0.171190759
2538	425877	0.001256799	6.14E-04	I	0.183086782
2545	426075	0.001321806	6.17E-04	I	0.182553966
2556	427074	0.001412421	5.36E-04	I	0.196675784
2567	428503	0.001519234	4.69E-04	I	0.196759222
2588	429887	0.001737456	5.06E-04	I	0.204010177
2593	430277	0.001653625	3.76E-04	I	0.207862166
2598	430712	0.001491218	3.18E-04	I	0.205744211
2605	431249	0.001219371	2.88E-04	I	0.20358193
2620	432449	0.001334282	2.97E-04	I	0.198678291
2627	432803	0.001410233	3.93E-04	I	0.204002358
2644	433491	0.001519891	3.82E-04	I	0.197543637
2658	437181	0.001621012	4.17E-04	I	0.191759227
2675	437916	0.001737456	5.10E-04	I	0.186845151
2686	439096	0.001727387	5.95E-04	I	0.172833321
2701	440147	0.001405855	5.55E-04	I	0.159216235
2703	440298	0.001415048	5.56E-04	I	0.158573175
2706	440435	0.001459261	5.63E-04	I	0.155942627
2706	440435	0.001459261	5.63E-04	I	0.155942627
2725	441415	0.001544843	5.72E-04	I	0.167559064
2740	442895	0.001621669	5.88E-04	I	0.161283344
2752	445552	0.001410233	5.42E-04	I	0.158763801
2764	447544	0.001308235	5.21E-04	I	0.165602484
2774	447990	0.001019316	4.19E-04	I	0.157109438
2778	448204	8.74E-04	3.14E-04	I	0.182477054
2782	448276	7.40E-04	2.68E-04	I	0.185990525
2783	448325	7.31E-04	2.67E-04	I	0.187438225
2786	448463	6.87E-04	2.60E-04	I	0.19410257
2786	448463	6.87E-04	2.60E-04	I	0.19410257
2795	448909	4.42E-04	2.31E-04	I	0.186929977
2807	450010	2.11E-04	7.63E-05	I	0.205677123
2811	450587	1.09E-04	1.75E-05	I	0.184296324
2815	451356	1.77E-05	0	I	0.047058824
2817	526247	0	8.57E-07	I	0.002150538
2818	527924	4.38E-05	2.56E-06	I	0.137706588
2824	528214	1.72E-04	2.89E-05	I	0.119114653
2831	528944	3.82E-04	1.11E-04	I	0.167109169
2837	529239	5.01E-04	1.80E-04	I	0.165194668
2841	529731	5.83E-04	1.86E-04	I	0.228815069
2849	530262	7.54E-04	2.01E-04	I	0.210745182
2857	530978	9.45E-04	2.19E-04	I	0.214930263
2859	531149	0.001010999	2.19E-04	I	0.212492322
2866	531879	0.001243666	2.75E-04	I	0.209172362
2869	532192	0.001348509	2.88E-04	I	0.206179225
2877	532574	0.001363611	3.36E-04	I	0.201436972
2892	533749	0.00140104	3.58E-04	I	0.204083428
2902	535235	0.001273653	2.76E-04	I	0.200778941
2912	535714	0.001327059	2.54E-04	I	0.206443912
2917	536607	0.001253297	2.49E-04	I	0.17472382
2925	537255	0.001082134	2.35E-04	I	0.181183657
2943	538323	0.001078413	2.43E-04	I	0.159071687
2955	539313	0.001158304	2.71E-04	I	0.165641596
2968	541291	0.001160492	3.02E-04	I	0.191184144
2984	543733	0.001245417	3.07E-04	I	0.178526133
2999	544528	0.001501943	3.19E-04	I	0.210722719
3018	545511	0.001457073	3.80E-04	I	0.21657259
3026	546109	0.001493844	4.50E-04	I	0.217009032
3034	546295	0.001370834	4.59E-04	I	0.212402051
3043	546582	0.001479398	5.05E-04	I	0.205873878
3050	547427	0.00159015	5.58E-04	I	0.210616924
3063	547928	0.001471518	5.36E-04	I	0.216936962
3077	548621	0.001371053	5.33E-04	I	0.211700374
3084	548932	0.001136197	4.45E-04	I	0.19348614
3097	550128	9.46E-04	4.27E-04	I	0.209736149
3105	551165	6.31E-04	3.65E-04	I	0.170390904
3119	552015	5.62E-04	2.56E-04	I	0.150643255
3131	552936	6.17E-04	2.32E-04	I	0.151146574
3139	554244	6.77E-04	1.77E-04	I	0.149738697
3155	559143	7.37E-04	1.44E-04	I	0.143904462
3167	559957	7.09E-04	1.24E-04	I	0.108316571
3178	561035	7.86E-04	1.41E-04	I	0.104621331
3193	562241	8.58E-04	1.69E-04	I	0.107839855
3199	562739	9.15E-04	1.99E-04	I	0.104524229
3206	563275	0.001066375	2.05E-04	I	0.102217774
3211	563464	0.001134884	2.09E-04	I	0.100809414
3219	564005	0.001182161	2.22E-04	I	0.122021409
3233	564586	0.001106867	1.78E-04	I	0.10824919
3244	565430	0.001129412	1.83E-04	I	0.111468813
3260	566732	0.001173406	3.81E-04	I	0.13698913
3269	567260	0.001129412	3.47E-04	I	0.138492843
3283	568696	0.001080821	3.90E-04	I	0.1492874
3303	570281	0.001077975	4.54E-04	I	0.152381273
3318	571535	0.001147798	5.02E-04	I	0.175250853
3339	573321	0.00131896	6.27E-04	I	0.18143144
3352	574326	0.001448536	6.32E-04	I	0.183167555
3364	574719	0.001441313	6.25E-04	I	0.169829154
3379	575722	0.00146736	6.27E-04	I	0.168443039
3388	576105	0.001378933	6.38E-04	I	0.168172477
3402	576724	0.001210178	4.32E-04	I	0.158823942
3412	576950	0.001239945	4.44E-04	I	0.156618027
3423	577682	0.001186977	3.82E-04	I	0.152494655
3439	578577	0.00128	3.02E-04	I	0.157096734
3458	579958	0.001398413	2.94E-04	I	0.145045252
3477	582435	0.001142326	1.97E-04	I	0.129812096
3486	582804	9.44E-04	1.88E-04	I	0.122902308
3495	583302	8.92E-04	1.81E-04	I	0.127209987
3514	585146	9.53E-04	2.07E-04	I	0.132659835
3518	585279	9.20E-04	1.88E-04	I	0.13528967
3529	585901	9.69E-04	2.71E-04	I	0.149655281
3546	588480	0.001037921	4.17E-04	I	0.158694408
3556	589182	0.001116279	4.19E-04	I	0.161999609
3564	589845	9.22E-04	3.83E-04	I	0.160410496
3578	591340	7.31E-04	3.21E-04	I	0.156918015
3592	592616	9.79E-04	4.65E-04	I	0.200282839
3602	592909	0.001152394	6.54E-04	I	0.19932631
3608	593537	0.00120974	6.56E-04	I	0.196730864
3620	595474	0.001023037	6.27E-04	I	0.205430967
3621	595590	0.001013844	6.27E-04	I	0.20630231
3629	596233	9.94E-04	5.41E-04	I	0.205895578
3653	597388	0.001132914	4.97E-04	I	0.207065545
3659	597623	0.001053461	4.93E-04	I	0.212389743
3667	598224	0.00128591	5.99E-04	I	0.190626445
3674	601847	0.001324213	6.14E-04	I	0.184528637
3683	602161	0.001009248	4.36E-04	I	0.154704391
3696	602658	9.38E-04	2.95E-04	I	0.15920313
3704	603040	9.18E-04	2.96E-04	I	0.158726329
3709	604386	9.75E-04	3.01E-04	I	0.153969206
3709	604386	9.75E-04	3.01E-04	I	0.153969206
3715	604781	9.30E-04	3.03E-04	I	0.149885543
3729	607952	6.53E-04	1.89E-04	I	0.132122354
3729	607952	6.10E-04	1.87E-04	I	0.122573154
3736	608858	3.64E-04	8.11E-05	I	0.159260967
3739	609058	2.72E-04	5.88E-05	I	0.174678485
3739	609058	2.72E-04	5.88E-05	I	0.174678485
3742	609213	1.71E-04	1.20E-05	I	0.068645954
3746	609528	9.37E-05	8.55E-06	I	0.070219753
3752	611534	3.68E-05	3.42E-06	I	0.10159268
3752	611534	3.68E-05	3.42E-06	I	0.10159268
3756	624435	2.28E-05	0	I	0.021176471
3756	624435	2.28E-05	0	I	0.021176471
3756	624435	2.28E-05	0	I	0.021176471
3756	624435	2.28E-05	0	I	0.021176471
3757	624469	2.74E-05	0	I	0.019607843
3760	629212	6.65E-05	3.41E-06	I	0.039166188
3760	629212	6.65E-05	3.41E-06	I	0.039166188
3760	629212	6.65E-05	3.41E-06	I	0.039166188
3760	629212	6.65E-05	3.41E-06	I	0.039166188
3760	629212	6.65E-05	3.41E-06	I	0.039166188
3762	629231	4.38E-05	3.41E-06	I	0.047610194
3762	629231	4.38E-05	3.41E-06	I	0.047610194
3762	629231	4.38E-05	3.41E-06	I	0.047610194
3762	629231	4.38E-05	3.41E-06	I	0.047610194
3762	629231	3.92E-05	3.41E-06	I	0.051323844
3770	661867	1.07E-04	5.97E-06	I	0.072828876
3774	661957	1.54E-04	1.02E-05	I	0.068352312
3781	662406	4.44E-04	1.33E-04	I	0.262721632
3788	663466	6.95E-04	1.52E-04	I	0.241468594
3795	663826	8.33E-04	2.16E-04	I	0.316391242
3802	664376	0.00100684	2.89E-04	I	0.353474312
3810	664889	0.001244542	3.97E-04	I	0.332782606
3813	665033	0.00129357	3.98E-04	I	0.326590212
3813	665033	0.00129357	3.98E-04	I	0.326590212
3813	665033	0.00129357	3.98E-04	I	0.326590212
3819	665657	0.001200547	3.94E-04	I	0.337384317
3825	666145	0.001167059	4.07E-04	I	0.339699346
3837	666852	0.00100093	3.59E-04	I	0.332986535
3851	667647	8.71E-04	4.12E-04	I	0.333354525
3859	668378	7.69E-04	4.00E-04	I	0.288428352
3866	672929	5.96E-04	3.27E-04	I	0.2139565
3875	673655	3.58E-04	2.20E-04	I	0.196374847
3878	674004	3.09E-04	2.18E-04	I	0.208934481
3878	674004	3.09E-04	2.18E-04	I	0.208934481
3884	674756	4.13E-04	2.78E-04	I	0.198645052
3887	674813	4.13E-04	2.77E-04	I	0.198922741
3888	674816	3.99E-04	2.60E-04	I	0.205347581
3894	675689	2.75E-04	1.85E-04	I	0.189538063
3901	680507	1.55E-04	1.13E-04	I	0.232610781
3902	680541	1.17E-04	6.05E-05	I	0.153610968
3902	680541	1.17E-04	6.05E-05	I	0.153610968
3902	680541	1.17E-04	6.05E-05	I	0.153610968
3902	680541	1.17E-04	6.05E-05	I	0.153610968
3902	680541	1.17E-04	6.05E-05	I	0.153610968
3909	681175	1.38E-05	0	I	0.011764706
3915	695769	1.14E-04	4.27E-06	I	0.220926829
3925	696208	4.28E-04	2.05E-05	I	0.221912789
3927	696219	4.50E-04	2.30E-05	I	0.215052351
3930	696397	4.73E-04	2.30E-05	I	0.207495551
3931	696456	4.73E-04	2.56E-05	I	0.206653786
3939	696844	6.13E-04	3.24E-05	I	0.198487369
3941	697723	6.31E-04	3.24E-05	I	0.194269795
3941	697723	6.31E-04	3.24E-05	I	0.194269795
3941	697723	6.36E-04	3.24E-05	I	0.193245004
3948	698352	7.90E-04	7.52E-05	I	0.194658007
3959	700434	7.85E-04	1.04E-04	I	0.173012664
3978	704458	6.55E-04	1.05E-04	I	0.128250885
3987	705012	7.28E-04	1.07E-04	I	0.123935023
3992	705503	7.65E-04	1.10E-04	I	0.129781354
3995	705608	8.07E-04	1.09E-04	I	0.128580327
4004	706319	6.99E-04	1.04E-04	I	0.120698972
4009	706766	7.80E-04	1.09E-04	I	0.131396332
4009	706766	7.80E-04	1.09E-04	I	0.131396332
4010	706789	7.75E-04	1.09E-04	I	0.131942563
4018	707028	6.34E-04	6.79E-05	I	0.10932227
4024	707638	5.25E-04	3.50E-05	I	0.119188712
4036	709383	3.92E-04	1.96E-05	I	0.126606149
4043	711273	3.03E-04	1.45E-05	I	0.140468036
4045	711324	2.42E-04	1.19E-05	I	0.133595501
4047	711383	2.00E-04	1.02E-05	I	0.140822703
4049	714764	1.68E-04	8.54E-06	I	0.142937552
4052	716233	6.89E-05	3.42E-06	I	0.0647207
4052	716233	6.89E-05	3.42E-06	I	0.0647207
4052	716233	6.89E-05	3.42E-06	I	0.0647207
4053	716438	5.58E-05	1.71E-06	I	0.06779516
4053	716438	5.58E-05	1.71E-06	I	0.06779516
4056	717014	4.60E-06	0	I	0.011764706
4057	731827	5.73E-05	4.28E-05	I	0.289434663
4062	732312	1.20E-04	8.28E-05	I	0.213962618
4071	733051	3.24E-04	1.30E-04	I	0.19956179
4077	733311	5.45E-04	1.43E-04	I	0.212526642
4083	733742	7.51E-04	2.07E-04	I	0.210017322
4092	734645	9.39E-04	2.38E-04	I	0.199087494
4101	735246	0.001131163	3.51E-04	I	0.218622816
4108	735748	0.001310862	3.88E-04	I	0.214212793
4112	736250	0.001439343	4.29E-04	I	0.21784658
4120	736766	0.001612038	5.12E-04	I	0.232132238
4133	737443	0.001859152	5.13E-04	I	0.224251018
4148	738059	0.002183748	4.92E-04	I	0.239725298
4161	739071	0.002086566	4.51E-04	I	0.245355394
4183	740767	0.002205636	5.57E-04	I	0.246811668
4196	741430	0.002032503	5.28E-04	I	0.246583823
4216	742412	0.001978222	5.16E-04	I	0.245221619
4234	743498	0.001895923	4.26E-04	I	0.233960509
4252	744488	0.001935321	4.77E-04	I	0.230987542
4263	744913	0.001899425	5.17E-04	I	0.227985056
4278	745371	0.001892202	4.45E-04	I	0.215543506
4295	746500	0.00170725	4.22E-04	I	0.217376186
4305	747010	0.001320492	4.04E-04	I	0.195635102
4313	747435	0.001249357	3.99E-04	I	0.187811611
4335	748666	0.001043611	2.98E-04	I	0.222586261
4346	749138	0.001070534	2.76E-04	I	0.223904245
4357	749903	9.36E-04	2.57E-04	I	0.24061033
4366	750525	8.26E-04	2.33E-04	I	0.251967443
4385	753647	7.59E-04	2.47E-04	I	0.243050586
4397	754483	7.59E-04	2.04E-04	I	0.246622545
4408	755592	6.73E-04	2.41E-04	I	0.2509175
4422	758742	6.89E-04	2.45E-04	I	0.233523563
4431	759694	7.49E-04	2.95E-04	I	0.221778682
4434	759871	7.13E-04	2.94E-04	I	0.22741316
4442	760756	6.16E-04	3.14E-04	I	0.133162606
4450	761300	6.46E-04	3.07E-04	I	0.149647776
4450	761300	6.46E-04	3.07E-04	I	0.149647776
4458	761805	7.90E-04	3.74E-04	I	0.168867085
4470	762688	7.53E-04	3.12E-04	I	0.18450849
4476	762885	6.70E-04	2.79E-04	I	0.176254201
4487	765280	7.44E-04	2.37E-04	I	0.156561619
4502	767793	8.00E-04	2.80E-04	I	0.20802575
4524	770414	0.001131163	2.77E-04	I	0.196973062
4537	771665	0.001563666	4.19E-04	I	0.215196055
4543	772013	0.001620137	3.82E-04	I	0.216665224
4558	772600	0.001850834	4.63E-04	I	0.196430591
4569	772989	0.002279179	5.66E-04	I	0.194986801
4577	773398	0.002135157	4.99E-04	I	0.190610844
4585	773625	0.002069494	4.66E-04	I	0.188379173
4594	773854	0.002250287	4.93E-04	I	0.197364746
4609	775392	0.00230829	5.36E-04	I	0.204391661
4621	775638	0.002388399	5.68E-04	I	0.197395184
4645	776656	0.002201477	6.07E-04	I	0.190854839
4671	779921	0.002075622	5.72E-04	I	0.163429963
4675	780171	0.00199026	5.71E-04	I	0.164666009
4686	780861	0.001670698	4.83E-04	I	0.176672467
4698	781189	0.001242353	3.80E-04	I	0.172687042
4698	781189	0.001242353	3.80E-04	I	0.172687042
4702	782094	0.001193762	3.74E-04	I	0.176669432
4710	782414	0.001003995	3.41E-04	I	0.156570745
4718	782806	7.91E-04	2.92E-04	I	0.137668222
4724	783047	5.20E-04	1.92E-04	I	0.081220849
4742	783842	4.46E-04	1.24E-04	I	0.110508639
4764	793147	4.71E-04	4.18E-05	I	0.2202921
4775	793455	7.95E-04	1.68E-04	I	0.214523515
4784	794091	0.00101275	1.94E-04	I	0.197190386
4795	794756	0.00122156	3.09E-04	I	0.191799349
4797	794816	0.00129357	3.11E-04	I	0.194632525
4802	794992	0.001329029	3.71E-04	I	0.192033957
4814	795631	0.001741614	4.33E-04	I	0.195200658
4822	796064	0.001899207	4.84E-04	I	0.192650269
4826	796239	0.001964651	4.84E-04	I	0.190877967
4835	796555	0.001848427	4.65E-04	I	0.194817961
4852	798672	0.00166632	4.97E-04	I	0.182275027
4870	799424	0.001539371	5.02E-04	I	0.18014027
4885	800518	0.001447661	6.03E-04	I	0.187309511
4909	803104	0.001568044	6.30E-04	I	0.200742201
4919	803967	0.001757592	6.52E-04	I	0.207224552
4933	804464	0.001912777	6.15E-04	I	0.20564571
4952	806294	0.001621012	6.28E-04	I	0.202076981
4965	806632	0.001566949	6.03E-04	I	0.20628721
4971	806763	0.001576142	6.06E-04	I	0.211662017
4975	806953	0.001580739	6.11E-04	I	0.210978758
4990	807809	0.001539371	6.40E-04	I	0.209789914
5000	808421	0.001380903	5.59E-04	I	0.203073778
5007	808641	0.001263803	4.76E-04	I	0.205095272
5027	810469	0.001208865	4.35E-04	I	0.200698918
5045	813037	0.001103584	4.21E-04	I	0.177682653
5058	813971	9.98E-04	4.01E-04	I	0.174637456
5071	816587	1.00E-03	3.50E-04	I	0.167615028
5079	817028	9.68E-04	3.90E-04	I	0.158692776
5086	817303	9.54E-04	4.29E-04	I	0.143695829
5096	817848	0.001112558	4.90E-04	I	0.143627142
5106	819151	0.001073817	4.23E-04	I	0.136042373
5115	819857	0.001188509	4.39E-04	I	0.148079203
5120	820313	0.001268181	4.10E-04	I	0.143148488
5132	821902	0.001116717	3.63E-04	I	0.123134256
5144	822707	9.82E-04	3.63E-04	I	0.12392298
5154	823632	0.001027196	3.72E-04	I	0.130664182
5162	824480	9.04E-04	3.47E-04	I	0.135262823
5175	825949	0.001092421	2.99E-04	I	0.145795933
5183	826458	0.001085198	2.97E-04	I	0.152729262
5193	828209	9.63E-04	2.35E-04	I	0.153214164
5201	828788	0.00105171	3.11E-04	I	0.189556875
5210	830269	9.11E-04	2.50E-04	I	0.190380409
5220	830749	9.59E-04	2.60E-04	I	0.190274106
5228	831229	9.85E-04	2.18E-04	I	0.192857732
5230	831339	9.64E-04	2.08E-04	I	0.196278878
5237	832877	8.34E-04	1.96E-04	I	0.200748935
5243	833391	9.39E-04	2.03E-04	I	0.187359585
5261	835928	9.18E-04	1.99E-04	I	0.189656844
5267	836313	8.95E-04	1.64E-04	I	0.18771453
5274	839534	9.32E-04	1.62E-04	I	0.183466533
5289	840397	9.49E-04	1.63E-04	I	0.141006673
5295	840655	9.98E-04	2.01E-04	I	0.14284787
5305	842184	8.93E-04	1.78E-04	I	0.142547001
5308	842404	7.61E-04	1.66E-04	I	0.131977093
5308	842404	7.61E-04	1.66E-04	I	0.131977093
5308	842404	7.61E-04	1.66E-04	I	0.131977093
5315	843214	6.56E-04	1.59E-04	I	0.143300866
5322	843589	4.18E-04	1.47E-04	I	0.119973378
5325	843632	3.87E-04	1.42E-04	I	0.124095307
5335	844416	4.21E-04	1.41E-04	I	0.127188327
5353	852829	4.70E-04	6.06E-05	I	0.118387056
5362	853042	4.91E-04	1.96E-05	I	0.103800317
5367	853534	5.00E-04	1.96E-05	I	0.115332008
5367	853534	4.83E-04	1.96E-05	I	0.116410936
5367	853534	4.83E-04	1.96E-05	I	0.116410936
5371	853701	5.10E-04	2.13E-05	I	0.111202013
5374	853880	5.24E-04	2.39E-05	I	0.108844558
5379	854165	5.78E-04	2.56E-05	I	0.101815518
5387	855725	6.90E-04	2.82E-05	I	0.102260028
5399	859311	6.51E-04	2.65E-05	I	0.098364423
5415	861074	5.49E-04	1.79E-05	I	0.07935454
5429	862463	5.68E-04	5.86E-05	I	0.091337141
5435	862693	5.66E-04	6.04E-05	I	0.082026227
5436	862795	5.84E-04	6.04E-05	I	0.080474128
5442	863374	6.65E-04	6.04E-05	I	0.07565508
5451	863661	6.91E-04	6.21E-05	I	0.074838496
5456	864293	7.13E-04	6.03E-05	I	0.074280277
5462	864462	6.59E-04	5.86E-05	I	0.077797985
5469	864776	5.48E-04	5.52E-05	I	0.072648777
5478	865588	4.78E-04	5.52E-05	I	0.073675586
5491	867455	4.55E-04	6.67E-05	I	0.07501746
5511	869391	5.25E-04	5.76E-05	I	0.148370302
5521	873273	5.81E-04	1.49E-04	I	0.28706924
5528	873818	6.67E-04	1.55E-04	I	0.287143794
5539	874398	6.65E-04	2.03E-04	I	0.32102969
5553	875317	7.19E-04	2.32E-04	I	0.302195941
5562	876466	7.90E-04	3.02E-04	I	0.28317984
5582	878145	0.001064843	4.77E-04	I	0.242374577
5592	878628	0.001277373	5.37E-04	I	0.237026232
5594	878671	0.001258988	5.37E-04	I	0.238802211
5611	879756	0.001283283	6.57E-04	I	0.247488017
5630	880504	0.001281532	6.83E-04	I	0.242029714
5639	880640	0.001250233	5.95E-04	I	0.192126035
5654	881057	0.001347415	6.17E-04	I	0.182488721
5671	881834	0.001443064	7.46E-04	I	0.169624564
5690	883925	0.001534337	7.28E-04	I	0.176311051
5701	884215	0.001477209	6.70E-04	I	0.178201726
5721	886151	0.001202079	4.95E-04	I	0.192122374
5735	886878	0.00104777	4.36E-04	I	0.186479385
5736	886895	0.00107316	4.37E-04	I	0.184943499
5746	887342	9.49E-04	3.00E-04	I	0.170149625
5756	887734	7.71E-04	2.41E-04	I	0.155953475
5760	887774	7.12E-04	2.35E-04	I	0.160243537
5770	888588	5.20E-04	2.06E-04	I	0.164688036
5786	889456	3.86E-04	2.98E-05	I	0.113566565
5798	892264	2.06E-04	2.04E-05	I	0.056086344
5803	896695	1.61E-04	7.60E-06	I	0.06187357
5805	897216	1.79E-04	9.30E-06	I	0.056740142
5817	900510	2.12E-04	3.41E-05	I	0.035016521
5825	901637	2.70E-04	4.01E-05	I	0.062034132
5832	901902	3.20E-04	4.85E-05	I	0.055530873
5833	901905	3.38E-04	5.02E-05	I	0.054389846
5841	902122	3.79E-04	6.13E-05	I	0.050432216
5842	902168	3.69E-04	6.13E-05	I	0.051224541
5849	902535	3.85E-04	6.64E-05	I	0.052390687
5852	903710	3.72E-04	6.05E-05	I	0.053570846
5858	903821	4.17E-04	1.28E-04	I	0.071328294
5870	905379	5.94E-04	1.36E-04	I	0.105555768
5882	907169	5.44E-04	1.13E-04	I	0.111955101
5896	909832	6.26E-04	1.62E-04	I	0.125379778
5915	910892	8.00E-04	1.69E-04	I	0.128525309
5922	911598	9.00E-04	2.20E-04	I	0.123279969
5931	912217	8.99E-04	2.51E-04	I	0.125787287
5931	912217	8.99E-04	2.51E-04	I	0.125787287
5942	912933	9.91E-04	2.85E-04	I	0.136444993
5945	913324	0.001005089	2.86E-04	I	0.135202581
5953	913437	9.91E-04	2.23E-04	I	0.133281372
5970	914362	9.93E-04	2.21E-04	I	0.123474001
5982	915109	0.001128974	2.70E-04	I	0.141943486
5996	917798	0.001139918	2.93E-04	I	0.150931685
6013	920348	0.00102435	2.79E-04	I	0.153213135
6019	920963	9.06E-04	2.26E-04	I	0.162991842
6027	921284	9.55E-04	1.86E-04	I	0.159000116
6034	921933	0.001060027	2.24E-04	I	0.151435744
6044	922279	9.29E-04	1.88E-04	I	0.145918707
6048	922871	9.49E-04	1.87E-04	I	0.149109294
6057	923214	0.001016471	1.93E-04	I	0.156203047
6069	925514	8.59E-04	1.89E-04	I	0.15772009
6077	926527	6.96E-04	1.38E-04	I	0.139932861
6084	926914	5.19E-04	5.87E-05	I	0.105345285
6090	927248	4.33E-04	6.12E-05	I	0.102875521
6091	927270	4.46E-04	6.63E-05	I	0.100962812
6105	929558	5.13E-04	8.67E-05	I	0.121561011
6117	931003	5.17E-04	4.84E-05	I	0.125204926
6123	935076	5.82E-04	5.09E-05	I	0.14597814
6126	935319	5.58E-04	5.18E-05	I	0.140856383
6133	935468	4.55E-04	4.16E-05	I	0.128050611
6140	936105	4.54E-04	1.13E-04	I	0.137260833
6146	936542	5.07E-04	1.23E-04	I	0.135198939
6147	936585	5.11E-04	1.40E-04	I	0.132517925
6150	937122	5.67E-04	1.38E-04	I	0.151857481
6160	940650	6.55E-04	3.05E-04	I	0.182764653
6174	941992	5.93E-04	3.61E-04	I	0.172857238
6188	944437	6.03E-04	3.68E-04	I	0.181560857
6192	944735	5.20E-04	3.63E-04	I	0.175321301
6194	944827	5.06E-04	3.62E-04	I	0.177622106
6194	944827	5.06E-04	3.62E-04	I	0.177622106
6196	944868	4.67E-04	2.87E-04	I	0.183110272
6201	945173	4.02E-04	2.77E-04	I	0.190830962
6209	945499	5.46E-04	2.77E-04	I	0.19452547
6219	946360	5.73E-04	2.88E-04	I	0.174916579
6235	952461	6.54E-04	1.57E-04	I	0.13371529
6247	953272	6.37E-04	8.13E-05	I	0.148674085
6264	954348	6.70E-04	1.77E-04	I	0.139770142
6270	954682	7.97E-04	1.85E-04	I	0.155930325
6276	955520	9.25E-04	1.90E-04	I	0.156026234
6278	955631	9.58E-04	1.91E-04	I	0.154394448
6285	956564	0.001116717	1.95E-04	I	0.149758684
6289	956660	0.001143639	2.03E-04	I	0.147054505
6301	957049	0.001118687	1.87E-04	I	0.136981939
6318	958716	0.001244542	3.45E-04	I	0.138265726
6331	960150	0.00118041	3.18E-04	I	0.136437739
6342	960986	0.001181505	3.33E-04	I	0.13333991
6355	962603	0.001125472	2.63E-04	I	0.131201903
6365	963103	0.001093078	2.95E-04	I	0.130570847
6372	963571	0.001013187	2.92E-04	I	0.138491201
6380	964330	0.001096799	2.93E-04	I	0.157197225
6395	965918	0.001017346	3.35E-04	I	0.155986748
6403	966348	0.001098112	0.000330101	I	0.17466844
6412	967221	0.001044049	3.67E-04	I	0.177525155
6426	969268	8.74E-04	2.42E-04	I	0.185701291
6432	970051	7.57E-04	2.27E-04	I	0.19660167
6437	970353	6.74E-04	2.10E-04	I	0.206417103
6442	970695	5.77E-04	1.77E-04	I	0.22060002
6446	970887	4.82E-04	1.37E-04	I	0.21613441
6452	971138	5.52E-04	2.86E-04	I	0.175477437
6468	973145	6.08E-04	4.20E-04	I	0.140128774
6483	978823	6.44E-04	3.99E-04	I	0.137996725
6497	979697	7.38E-04	5.10E-04	I	0.116583271
6509	980278	0.000884925	4.81E-04	I	0.141071283
6518	980798	8.60E-04	4.36E-04	I	0.142747708
6521	981453	9.01E-04	4.42E-04	I	0.139352693
6521	981453	9.01E-04	4.42E-04	I	0.139352693
6521	981453	9.01E-04	4.42E-04	I	0.139352693
6521	981453	9.01E-04	4.42E-04	I	0.139352693
6527	981569	7.84E-04	2.91E-04	I	0.146127416
6537	981873	6.11E-04	1.56E-04	I	0.156051445
6544	982208	4.96E-04	1.30E-04	I	0.172266689
6554	982994	2.94E-04	1.61E-05	I	0.203190792
6562	983459	7.70E-05	6.70E-06	I	0.025535669
6566	984435	4.05E-05	5.84E-06	I	0.032086933
6572	1001651	4.05E-05	0	I	0.032679739
6578	1002114	1.60E-04	8.42E-06	I	0.059887386
6580	1002131	2.38E-04	2.76E-05	I	0.067766967
6582	1002208	3.11E-04	3.35E-05	I	0.114628166
6587	1003581	4.25E-04	4.03E-05	I	0.140973965
6599	1005210	9.09E-04	1.71E-04	I	0.219902716
6599	1005210	9.09E-04	1.71E-04	I	0.219902716
6599	1005210	9.09E-04	1.71E-04	I	0.219902716
6604	1005596	9.62E-04	1.76E-04	I	0.21247951
6611	1006290	0.001091765	1.88E-04	I	0.199936624
6622	1006653	0.00132684	2.16E-04	I	0.202648275
6631	1009755	0.001216963	2.12E-04	I	0.211356108
6637	1009927	0.001239945	1.96E-04	I	0.21308965
6651	1010585	0.001404104	2.63E-04	I	0.195322784
6662	1011408	0.001471737	2.61E-04	I	0.193678711
6685	1014108	0.001260301	2.31E-04	I	0.151636999
6687	1014197	0.001327278	2.36E-04	I	0.14900859
6695	1014619	0.001531053	2.56E-04	I	0.178512213
6704	1014878	0.001544624	2.51E-04	I	0.177942731
6711	1015294	0.001414829	2.38E-04	I	0.18519035
6720	1016055	0.001139261	2.10E-04	I	0.182884597
6722	1016093	0.001130068	2.06E-04	I	0.184316389
6726	1016145	0.001028728	2.03E-04	I	0.189235655
6741	1016560	8.38E-04	1.52E-04	I	0.203857621
6747	1018004	6.61E-04	1.48E-04	I	0.206410779
6762	1019045	4.43E-04	4.70E-05	I	0.21520501
6764	1019365	3.76E-04	4.28E-05	I	0.233162917
6772	1024858	1.72E-04	2.25E-05	I	0.060944261
6777	1026144	1.32E-04	2.25E-05	I	0.065454079
6777	1026144	1.32E-04	2.25E-05	I	0.065454079
6777	1026144	1.32E-04	2.25E-05	I	0.065454079
6777	1026144	1.32E-04	2.25E-05	I	0.065454079
6777	1026144	1.32E-04	2.25E-05	I	0.065454079
6780	1026283	8.49E-05	0	I	0.039009288
6780	1026283	8.03E-05	0	I	0.040522876
6784	1029884	2.67E-05	0	I	0.043137255
6784	1029884	2.67E-05	0	I	0.043137255
6784	1029884	2.67E-05	0	I	0.043137255
6786	1044642	4.60E-06	0	I	0.011764706
6787	1045794	9.19E-06	2.55E-06	I	0.011545294
6787	1045794	1.38E-05	2.55E-06	I	0.011607036
6787	1045794	1.38E-05	2.55E-06	I	0.011607036
6789	1046214	2.76E-05	3.40E-06	I	0.011418235
6791	1048257	4.60E-05	5.95E-06	I	0.009248926
6804	1050248	2.76E-04	1.79E-04	I	0.139889374
6813	1050784	3.75E-04	1.99E-04	I	0.11785008
6819	1050892	6.31E-04	3.69E-04	I	0.152620758
6826	1051348	8.07E-04	4.33E-04	I	0.142014413
6827	1051362	8.11E-04	4.33E-04	I	0.141664757
6831	1051493	8.49E-04	4.33E-04	I	0.14036727
6833	1051623	8.58E-04	4.34E-04	I	0.1394918
6835	1051765	8.76E-04	4.36E-04	I	0.138207262
6840	1051968	9.08E-04	4.40E-04	I	0.137652908
6848	1052388	0.001009029	5.02E-04	I	0.131016037
6866	1053409	8.45E-04	3.36E-04	I	0.117785064
6885	1058956	9.51E-04	3.30E-04	I	0.134695093
6895	1059670	8.68E-04	2.26E-04	I	0.113269256
6902	1060136	6.92E-04	1.63E-04	I	0.118355099
6910	1060977	8.27E-04	2.58E-04	I	0.13483567
6921	1061343	9.01E-04	3.04E-04	I	0.134633976
6927	1061773	9.27E-04	3.22E-04	I	0.131965447
6934	1062716	9.59E-04	3.44E-04	I	0.129194557
6940	1064492	9.31E-04	4.12E-04	I	0.127906551
6953	1065006	9.12E-04	4.00E-04	I	0.135391915
6962	1065611	8.73E-04	4.00E-04	I	0.13730558
6971	1066614	6.68E-04	3.88E-04	I	0.130246328
6982	1067766	6.00E-04	3.38E-04	I	0.116414625
6987	1067995	7.19E-04	3.88E-04	I	0.117537497
6995	1069150	5.89E-04	3.31E-04	I	0.097636263
7003	1069464	4.72E-04	2.82E-04	I	0.092601033
7007	1069900	4.33E-04	2.63E-04	I	0.096618377
7012	1070355	3.83E-04	2.39E-04	I	0.101242851
7016	1072165	3.65E-04	1.67E-04	I	0.103710617
7022	1072529	2.65E-04	1.14E-04	I	0.09608892
7025	1072898	2.37E-04	1.07E-04	I	0.103361044
7026	1072913	2.37E-04	1.04E-04	I	0.103986449
7032	1073379	1.32E-04	8.84E-05	I	0.12123447
7037	1074046	1.31E-05	3.79E-05	I	0.112928377
7047	1090572	3.14E-04	6.90E-05	I	0.176700722
7058	1091016	7.00E-04	1.11E-04	I	0.148726583
7062	1091161	7.63E-04	1.16E-04	I	0.141443105
7064	1091197	8.10E-04	1.17E-04	I	0.141454123
7064	1091197	8.10E-04	1.18E-04	I	0.141343467
7070	1091503	8.84E-04	1.46E-04	I	0.136119138
7080	1092117	0.001131819	2.11E-04	I	0.125217921
7093	1095143	0.001378495	3.31E-04	I	0.121343743
7101	1095957	0.00160985	3.99E-04	I	0.116557273
7109	1096305	0.001873817	5.53E-04	I	0.142604127
7127	1097096	0.001796772	5.04E-04	I	0.138770195
7142	1097756	0.001486183	4.68E-04	I	0.13962293
7149	1097978	0.001485308	4.76E-04	I	0.140560698
7160	1098455	0.001757592	5.15E-04	I	0.161091548
7163	1098880	0.001783858	5.37E-04	I	0.159711066
7170	1099355	0.001740301	5.11E-04	I	0.161373857
7190	1100595	0.002145663	5.81E-04	I	0.234628215
7212	1103412	0.002458878	5.45E-04	I	0.270074269
7235	1105130	0.003270479	6.17E-04	I	0.29960168
7257	1106805	0.004165034	6.47E-04	I	0.317681071
7267	1107751	0.003977018	6.29E-04	I	0.322982365
7279	1108523	0.00417948	6.82E-04	I	0.324785601
7285	1108758	0.004243611	7.07E-04	I	0.32596448
7296	1108859	0.003956443	7.38E-04	I	0.327993453
7300	1108933	0.0039571	7.15E-04	I	0.32867403
7302	1108979	0.003931053	7.13E-04	I	0.329839893
7313	1109125	0.003326949	5.85E-04	I	0.324843401
7321	1109784	0.002767059	5.01E-04	I	0.323491326
7336	1110102	0.001724104	3.61E-04	I	0.320248646
7350	1111953	5.66E-04	1.77E-04	I	0.263894466
7353	1112032	5.17E-04	1.74E-04	I	0.273214045
7360	1112453	2.38E-04	1.15E-04	I	0.241632874
7364	1114933	1.13E-04	7.83E-05	I	0.209699143
7366	1114945	8.08E-05	6.65E-06	I	0.255419198
7368	1116002	6.74E-05	6.65E-06	I	0.28405391
7371	1125020	7.20E-05	8.36E-06	I	0.268113704
7379	1126463	1.87E-04	5.94E-05	I	0.156681579
7388	1126921	4.68E-04	1.76E-04	I	0.234100094
7390	1126931	4.91E-04	1.77E-04	I	0.228401966
7390	1126931	4.91E-04	1.77E-04	I	0.228401966
7390	1126931	4.91E-04	1.77E-04	I	0.228401966
7390	1126931	4.91E-04	1.77E-04	I	0.228401966
7390	1126931	4.91E-04	1.77E-04	I	0.228401966
7390	1126931	4.91E-04	1.77E-04	I	0.228401966
7391	1127005	4.77E-04	1.77E-04	I	0.231694623
7405	1127838	6.58E-04	1.94E-04	I	0.197239637
7414	1135245	5.30E-04	1.73E-04	I	0.204291674
7426	1135632	2.96E-04	5.69E-05	I	0.083817279
7431	1135858	3.06E-04	6.52E-05	I	0.079894489
7440	1137475	4.79E-04	7.53E-05	I	0.080537785
7456	1139500	8.27E-04	3.11E-04	I	0.113065944
7459	1139512	9.11E-04	3.14E-04	I	0.11384836
7465	1139710	9.88E-04	3.20E-04	I	0.111218256
7472	1140279	0.001088263	3.31E-04	I	0.107786495
7474	1140310	0.001111245	3.31E-04	I	0.106402981
7489	1140662	9.65E-04	3.15E-04	I	0.112322063
7493	1140753	0.001042955	4.26E-04	I	0.095586914
7501	1140961	0.001157428	5.57E-04	I	0.088375706
7509	1142255	0.001192011	5.75E-04	I	0.090281855
7520	1143321	0.001036389	5.71E-04	I	0.090311036
7541	1145135	7.64E-04	4.20E-04	I	0.062798726
7548	1146993	7.07E-04	4.17E-04	I	0.056441263
7561	1148107	7.63E-04	4.17E-04	I	0.057611319
7574	1150202	7.64E-04	4.09E-04	I	0.056387879
7589	1152099	9.43E-04	5.24E-04	I	0.066477106
7599	1152765	0.001042298	5.39E-04	I	0.066129782
7610	1153738	0.001095705	4.63E-04	I	0.085822496
7624	1154339	0.001098769	3.70E-04	I	0.086465516
7636	1154916	0.001156115	3.49E-04	I	0.082371436
7648	1155401	0.001313707	5.76E-04	I	0.090189946
7662	1156321	0.001434966	5.61E-04	I	0.092269099
7667	1156545	0.00141658	5.61E-04	I	0.092955899
7677	1157240	0.001328591	5.63E-04	I	0.092956936
7702	1158734	0.00145751	5.85E-04	I	0.090571203
7719	1159858	0.001323119	4.72E-04	I	0.08890859
7733	1160273	0.001253078	4.81E-04	I	0.087678668
7753	1163070	0.001331655	4.92E-04	I	0.074988887
7768	1163670	0.001286347	4.66E-04	I	0.081200732
7777	1163839	0.001180629	4.60E-04	I	0.083494063
7790	1164273	0.001027852	2.31E-04	I	0.071504463
7800	1165046	8.45E-04	1.62E-04	I	0.060868099
7809	1165778	0.001040985	2.37E-04	I	0.07718572
7814	1166013	0.001010342	2.30E-04	I	0.077907528
7833	1166814	7.85E-04	2.05E-04	I	0.083010004
7841	1167704	7.70E-04	2.14E-04	I	0.080638364
7861	1171036	0.001112558	2.41E-04	I	0.133692626
7880	1174342	0.001051272	1.82E-04	I	0.153639764
7891	1175372	0.001055869	1.82E-04	I	0.160543292
7902	1175735	0.001216744	2.14E-04	I	0.169530222
7911	1176031	0.001294227	2.19E-04	I	0.164271194
7917	1176414	0.001382216	3.08E-04	I	0.152570918
7940	1178090	0.001388564	2.39E-04	I	0.145770553
7949	1178639	0.001536088	2.50E-04	I	0.144171112
7954	1178875	0.001630205	2.53E-04	I	0.146001356
7973	1180929	0.001785171	3.27E-04	I	0.138216374
8000	1181827	0.001565855	3.29E-04	I	0.119873733
8010	1182044	0.001399726	3.06E-04	I	0.113561582
8018	1182400	0.001396224	2.97E-04	I	0.118019041
8034	1184127	0.001315896	2.65E-04	I	0.099295826
8040	1184369	0.001215431	2.55E-04	I	0.102815685
8050	1184674	0.001163776	1.70E-04	I	0.108422414
8066	1185243	9.52E-04	1.65E-04	I	0.116364431
8076	1185631	8.22E-04	1.57E-04	I	0.113352492
8083	1185675	7.55E-04	1.54E-04	I	0.103611298
8104	1188584	6.35E-04	7.42E-05	I	0.113091583
8123	1190506	4.88E-04	2.38E-05	I	0.087199754
8126	1192542	4.84E-04	2.64E-05	I	0.086926627
8130	1193010	3.67E-04	2.30E-05	I	0.034665542
8144	1194367	3.31E-04	6.93E-05	I	0.037168478
8155	1195919	4.76E-04	1.17E-04	I	0.136802516
8176	1199049	6.96E-04	1.58E-04	I	0.238699089
8178	1199205	7.05E-04	1.57E-04	I	0.23701034
8180	1199232	6.79E-04	1.54E-04	I	0.242441285
8190	1199749	7.49E-04	1.60E-04	I	0.228815678
8199	1200060	6.95E-04	1.74E-04	I	0.233677799
8210	1200359	6.87E-04	1.83E-04	I	0.232855574
8214	1200446	7.05E-04	1.83E-04	I	0.229938661
8220	1200546	7.72E-04	1.88E-04	I	0.220576509
8233	1203487	7.98E-04	1.52E-04	I	0.221476236
8244	1203824	6.52E-04	1.04E-04	I	0.202027209
8264	1206078	4.20E-04	5.85E-05	I	0.035659159
8274	1207287	6.45E-04	7.53E-05	I	0.136045702
8278	1207848	6.86E-04	7.71E-05	I	0.130623182
8295	1210742	9.28E-04	3.78E-04	I	0.160172396
8299	1210970	9.08E-04	3.61E-04	I	0.163908932
8305	1211108	8.67E-04	3.46E-04	I	0.169729669
8307	1211222	8.36E-04	3.43E-04	I	0.173159408
8313	1211258	7.64E-04	0.000338231	I	0.178965157
8319	1212025	6.75E-04	3.27E-04	I	0.191043504
8319	1212025	6.75E-04	3.27E-04	I	0.191043504
8323	1212824	6.38E-04	3.27E-04	I	0.196599856
8334	1213603	4.29E-04	3.14E-04	I	0.15960973
8340	1213710	4.03E-04	3.13E-04	I	0.163751042
8352	1222033	8.58E-05	6.81E-06	I	0.020231137
8357	1223489	1.92E-04	1.27E-05	I	0.167329153
8357	1223489	1.92E-04	1.27E-05	I	0.167329153
8357	1223489	1.92E-04	1.27E-05	I	0.167329153
8357	1223489	1.92E-04	1.27E-05	I	0.167329153
8357	1223489	1.92E-04	1.27E-05	I	0.167329153
8357	1223489	1.92E-04	1.27E-05	I	0.167329153
8357	1223489	1.92E-04	1.27E-05	I	0.167329153
8359	1223676	1.70E-04	8.51E-06	I	0.183340095
8362	1224025	1.52E-04	8.51E-06	I	0.199455576
8365	1224235	1.24E-04	7.65E-06	I	0.229737674
8368	1231093	4.60E-06	8.57E-07	I	0.010266846
8368	1231093	4.60E-06	8.57E-07	I	0.010266846
8368	1231093	4.60E-06	8.57E-07	I	0.010266846
8374	1237609	4.60E-05	2.57E-06	I	0.011260343
8374	1237609	4.60E-05	2.57E-06	I	0.011260343
8375	1237615	7.22E-05	8.41E-06	I	0.018547019
8380	1237986	1.47E-04	9.27E-06	I	0.03405639
8389	1240741	2.96E-04	9.87E-05	I	0.083978379
8404	1241694	5.42E-04	2.69E-04	I	0.113744439
8411	1242035	6.18E-04	2.76E-04	I	0.106536935
8417	1242233	6.72E-04	2.91E-04	I	0.100993895
8418	1242265	6.81E-04	2.91E-04	I	0.100225687
8424	1242394	7.71E-04	2.93E-04	I	0.094764635
8434	1242766	7.84E-04	2.91E-04	I	0.094476139
8444	1243215	9.25E-04	3.11E-04	I	0.088946853
8445	1243250	9.03E-04	3.05E-04	I	0.090160517
8459	1244294	9.56E-04	3.10E-04	I	0.090723154
8470	1246522	8.76E-04	2.40E-04	I	0.085147311
8495	1248521	7.54E-04	1.35E-04	I	0.061157086
8510	1250101	9.11E-04	2.53E-04	I	0.110105072
8520	1250536	9.29E-04	2.43E-04	I	0.112622967
8534	1252312	0.001172312	3.32E-04	I	0.159832535
8545	1252848	0.001159617	3.83E-04	I	0.162358485
8556	1253634	0.001235568	4.36E-04	I	0.159128543
8573	1254514	0.001208646	4.90E-04	I	0.157043694
8582	1255312	0.001388345	5.72E-04	I	0.146417213
8603	1256243	0.001530616	7.59E-04	I	0.136079267
8613	1257399	0.001563228	7.49E-04	I	0.134384426
8635	1258826	0.001935321	7.01E-04	I	0.161581899
8649	1259928	0.001859371	5.81E-04	I	0.154300029
8653	1259938	0.001787141	5.76E-04	I	0.156642615
8666	1260257	0.001534774	4.87E-04	I	0.129738297
8670	1260426	0.001457729	4.34E-04	I	0.131120765
8677	1260675	0.001327278	3.81E-04	I	0.135106413
8684	1261073	0.00121368	3.07E-04	I	0.145186623
8693	1261877	0.001029384	2.24E-04	I	0.159720366
8706	1262569	7.59E-04	3.23E-05	I	0.204582799
8714	1262896	6.54E-04	2.97E-05	I	0.223711643
8734	1272406	2.57E-04	4.16E-05	I	0.085250071
8746	1272717	1.80E-04	4.07E-05	I	0.020910158
8763	1274025	4.87E-04	1.20E-04	I	0.070634005
8772	1274300	6.68E-04	1.48E-04	I	0.083626383
8783	1274666	9.60E-04	2.68E-04	I	0.122307839
8792	1274876	0.00106922	2.76E-04	I	0.114092701
8798	1275027	0.001131819	2.78E-04	I	0.110873514
8807	1275338	0.001418988	3.18E-04	I	0.125432848
8815	1276023	0.001498878	3.40E-04	I	0.119993544
8816	1276048	0.001498878	3.33E-04	I	0.120350187
8824	1276573	0.001399726	3.03E-04	I	0.127501405
8831	1276677	0.00131896	2.99E-04	I	0.131971275
8848	1277643	0.001011874	2.20E-04	I	0.142445727
8857	1278376	8.30E-04	1.92E-04	I	0.147048671
8867	1279412	5.38E-04	7.21E-05	I	0.115300353
8877	1279693	4.30E-04	6.36E-05	I	0.135695622
8882	1279906	3.67E-04	6.19E-05	I	0.148689993
8892	1280319	7.99E-05	2.22E-05	I	0.015919643
8903	1292903	4.07E-05	8.46E-06	I	0.021322182
8912	1293375	1.40E-04	1.02E-05	I	0.024700699
8916	1293513	2.63E-04	2.49E-05	I	0.127601904
8921	1293898	3.13E-04	2.49E-05	I	0.113789493
8940	1295945	6.13E-04	6.46E-05	I	0.127477813
8950	1296211	7.66E-04	6.97E-05	I	0.126850899
8963	1296465	9.96E-04	1.31E-04	I	0.117824963
8969	1296504	0.001116717	1.40E-04	I	0.112543049
8969	1296504	0.001116717	1.40E-04	I	0.112543049
8973	1296637	0.001160711	1.48E-04	I	0.109792468
8980	1296985	0.001142763	1.43E-04	I	0.111215598
8993	1297762	0.00118829	1.58E-04	I	0.127457254
9001	1298109	0.001107962	1.55E-04	I	0.112089744
9010	1298438	0.00116487	2.07E-04	I	0.113951371
9038	1299770	9.92E-04	2.47E-04	I	0.10098657
9062	1303949	0.001110807	4.26E-04	I	0.083455648
9081	1306095	9.54E-04	4.42E-04	I	0.085006209
9092	1306870	9.42E-04	4.37E-04	I	0.087775951
9095	1306925	9.78E-04	4.37E-04	I	0.086514589
9099	1307313	9.34E-04	4.28E-04	I	0.088271335
9110	1307527	0.001066594	4.91E-04	I	0.09217352
9122	1307848	0.001065062	5.51E-04	I	0.077592473
9131	1308619	0.001081696	5.52E-04	I	0.077022912
9147	1310129	0.001208427	5.43E-04	I	0.072323139
9166	1312856	0.001240821	4.95E-04	I	0.073579027
9184	1314413	0.001090451	3.17E-04	I	0.094993499
9190	1314902	0.001017565	2.39E-04	I	0.092978129
9209	1315825	0.001269275	2.60E-04	I	0.115849038
9223	1316255	0.001591026	3.39E-04	I	0.12770516
9234	1316748	0.001783201	3.65E-04	I	0.121812836
9255	1319546	0.001757811	3.24E-04	I	0.117848241
9274	1320013	0.002004487	3.45E-04	I	0.122121807
9288	1320661	0.002087442	3.87E-04	I	0.124416958
9305	1321267	0.001999015	3.47E-04	I	0.128541007
9331	1322502	0.002120055	3.28E-04	I	0.127396845
9348	1323246	0.002328865	3.29E-04	I	0.117906404
9354	1323379	0.002478358	3.38E-04	I	0.114116137
9368	1324159	0.002118085	3.15E-04	I	0.103079345
9380	1324950	0.001760438	2.36E-04	I	0.089449928
9391	1325818	0.001568263	2.10E-04	I	0.092251883
9408	1326484	0.001543748	2.02E-04	I	0.093361489
9433	1327397	0.001286566	1.40E-04	I	0.080036271
9447	1327881	0.001238413	1.82E-04	I	0.080743265
9469	1332872	0.001362298	2.40E-04	I	0.088316265
9496	1333809	0.001328153	2.49E-04	I	0.126537783
9520	1335281	0.001333625	2.53E-04	I	0.16012165
9538	1335780	0.001353762	2.53E-04	I	0.159976619
9545	1336177	0.001510041	2.63E-04	I	0.153075461
9555	1336578	0.001720821	2.72E-04	I	0.150661975
9571	1337068	0.001876005	2.74E-04	I	0.142231783
9591	1338136	0.001927661	2.63E-04	I	0.139747006
9607	1338718	0.001865937	2.28E-04	I	0.143051492
9623	1339547	0.001986539	1.80E-04	I	0.141917022
9646	1340810	0.001885855	1.24E-04	I	0.149892803
9663	1341839	0.001700246	1.05E-04	I	0.123677479
9679	1341994	0.001421395	9.44E-05	I	0.091611113
9690	1342514	0.001251765	8.59E-05	I	0.0959096
9698	1342915	0.001095486	7.57E-05	I	0.098107469
9712	1343288	9.30E-04	6.97E-05	I	0.087345681
9734	1344933	8.29E-04	6.88E-05	I	0.094772891
9753	1346545	7.37E-04	6.97E-05	I	0.10328854
9759	1346877	7.19E-04	7.22E-05	I	0.108413911
9769	1350009	5.09E-04	2.30E-05	I	0.102124733
9780	1351819	3.73E-04	2.13E-05	I	0.051944656
9787	1351958	3.26E-04	2.04E-05	I	0.046674402
9792	1352343	2.69E-04	1.96E-05	I	0.045819235
9799	1352999	3.50E-04	2.38E-05	I	0.042442731
9809	1355993	4.75E-04	2.72E-05	I	0.041739789
9823	1358442	5.53E-04	2.55E-05	I	0.044897578
9833	1359054	5.40E-04	2.81E-05	I	0.044726896
9842	1359795	4.98E-04	2.38E-05	I	0.041361061
9855	1360246	6.20E-04	3.49E-05	I	0.063368719
9856	1360257	6.36E-04	3.49E-05	I	0.06508145
9873	1361744	7.71E-04	3.83E-05	I	0.064256818
9884	1362974	8.88E-04	3.83E-05	I	0.064552385
9898	1363728	0.001189603	5.45E-05	I	0.067669003
9916	1365312	0.001351792	6.46E-05	I	0.108152228
9927	1365784	0.001240602	6.12E-05	I	0.113468572
9941	1366404	0.001149111	6.20E-05	I	0.116971149
9948	1366703	0.001130944	5.86E-05	I	0.118561098
9952	1366823	0.001107962	5.52E-05	I	0.120723895
9964	1367448	9.33E-04	4.08E-05	I	0.119072231
9964	1367448	9.12E-04	4.08E-05	I	0.119355788
9983	1368073	8.37E-04	3.57E-05	I	0.126056354
9992	1368293	7.06E-04	3.31E-05	I	0.137079539
10006	1370002	4.04E-04	1.69E-05	I	0.177770985
10017	1371367	1.61E-04	2.57E-06	I	0.039941682
10018	1371472	1.47E-04	2.57E-06	I	0.042460958
10023	1375214	1.15E-04	8.57E-07	I	0.051235304
10025	1375348	9.17E-05	8.57E-07	I	0.060551197
10026	1375442	1.01E-04	8.57E-07	I	0.056342662
10028	1375561	1.23E-04	8.48E-06	I	0.053780361
10029	1375624	1.36E-04	8.48E-06	I	0.051370483
10040	1385096	7.20E-05	1.19E-05	I	0.025664115
10045	1385555	1.13E-04	1.53E-05	I	0.025787523
10050	1386150	1.53E-04	2.30E-05	I	0.022430078
10050	1386150	1.53E-04	2.30E-05	I	0.022430078
10061	1387527	2.46E-04	3.99E-05	I	0.029058113
10069	1389001	3.24E-04	4.16E-05	I	0.02762612
10071	1389131	3.42E-04	4.42E-05	I	0.026773197
10078	1389545	4.30E-04	6.24E-05	I	0.055314618
10086	1389897	4.79E-04	5.91E-05	I	0.05482607
10092	1390094	5.24E-04	6.16E-05	I	0.052734796
10099	1390839	5.10E-04	5.99E-05	I	0.05382727
10110	1391723	5.20E-04	6.33E-05	I	0.052375298
10122	1392860	5.43E-04	5.57E-05	I	0.051557838
10122	1392860	5.43E-04	5.57E-05	I	0.051557838
10133	1393971	4.50E-04	3.87E-05	I	0.054228808
10152	1396100	5.05E-04	4.55E-05	I	0.057438007
10160	1396315	5.10E-04	4.72E-05	I	0.056879891
10171	1397308	5.18E-04	5.98E-05	I	0.049966257
10180	1400411	5.31E-04	5.72E-05	I	0.057053388
10191	1400711	5.27E-04	6.23E-05	I	0.057443058
10203	1401569	6.82E-04	7.68E-05	I	0.060826111
10221	1403149	7.44E-04	9.20E-05	I	0.062468245
10235	1404843	7.57E-04	1.05E-04	I	0.063010014
10240	1405677	8.29E-04	1.08E-04	I	0.064447414
10240	1405677	8.29E-04	1.08E-04	I	0.064447414
10251	1405761	6.97E-04	9.93E-05	I	0.067034743
10256	1405853	6.74E-04	9.50E-05	I	0.068928332
10261	1406139	5.68E-04	6.42E-05	I	0.061983628
10265	1406366	4.84E-04	6.25E-05	I	0.05662491
10271	1406543	4.30E-04	5.49E-05	I	0.059619201
10280	1406633	2.61E-04	3.79E-05	I	0.054784605
10292	1407917	1.49E-04	1.58E-05	I	0.056146061
10301	1408125	9.00E-05	2.57E-06	I	0.07443756
10312	1418150	1.42E-04	8.52E-06	I	0.089450972
10314	1418260	1.70E-04	8.52E-06	I	0.079378691
10320	1419127	2.81E-04	1.36E-05	I	0.11129726
10332	1420623	4.49E-04	7.54E-05	I	0.098120329
10337	1421076	4.94E-04	7.96E-05	I	0.091390727
10344	1421336	5.58E-04	8.31E-05	I	0.084810876
10349	1421437	6.12E-04	8.90E-05	I	0.079872541
10352	1421551	6.91E-04	1.87E-04	I	0.102886764
10352	1421551	6.91E-04	1.87E-04	I	0.102886764
10353	1421558	6.78E-04	1.87E-04	I	0.103523671
10361	1422379	5.63E-04	1.79E-04	I	0.103933346
10365	1422529	5.45E-04	1.79E-04	I	0.105780345
10371	1423359	4.34E-04	1.75E-04	I	0.095340207
10383	1423993	2.66E-04	1.13E-04	I	0.104015887
10388	1424395	2.20E-04	1.09E-04	I	0.116235749
10395	1425790	1.56E-04	1.06E-04	I	0.137005537
10402	1428433	1.11E-04	1.01E-04	I	0.159606875
10417	1435257	1.49E-04	1.20E-05	I	0.027070268
10425	1435753	0.000252148	1.71E-05	I	0.02991205
10429	1435854	2.79E-04	1.79E-05	I	0.030324641
10431	1435860	2.74E-04	1.79E-05	I	0.03061084
10434	1435875	2.74E-04	1.96E-05	I	0.030449772
10437	1436159	2.88E-04	2.55E-05	I	0.029391472
10438	1436208	2.93E-04	2.81E-05	I	0.028998222
10440	1436280	3.32E-04	2.89E-05	I	0.0318672
10449	1436815	4.64E-04	4.77E-05	I	0.060861739
10453	1437714	4.95E-04	5.11E-05	I	0.060828133
10466	1440416	3.78E-04	4.17E-05	I	0.069343526
10474	1442996	2.75E-04	3.66E-05	I	0.08099215
10477	1443154	2.43E-04	3.58E-05	I	0.086444594
10483	1443616	2.88E-04	4.00E-05	I	0.078258898
10489	1443957	3.58E-04	5.60E-05	I	0.203279369
10498	1448440	4.92E-04	8.64E-05	I	0.182690004
10499	1448487	4.87E-04	8.39E-05	I	0.184458306
10507	1449250	6.13E-04	1.16E-04	I	0.239664586
10523	1450443	5.84E-04	1.66E-04	I	0.253324043
10540	1452922	0.001016033	2.67E-04	I	0.214358853
10551	1453347	0.001412859	2.82E-04	I	0.198751529
10562	1454131	0.001691929	2.94E-04	I	0.186998732
10563	1454231	0.001705499	2.95E-04	I	0.186001897
10584	1455521	0.002004049	3.00E-04	I	0.177642212
10596	1455750	0.002127934	3.02E-04	I	0.156837807
10609	1456057	0.002123338	2.68E-04	I	0.156353801
10625	1456551	0.002486457	3.05E-04	I	0.146124066
10635	1458094	0.002379644	2.75E-04	I	0.125449472
10646	1458467	0.002403283	2.58E-04	I	0.120230084
10671	1459410	0.002256854	2.32E-04	I	0.125914596
10690	1461012	0.002013899	2.20E-04	I	0.119038201
10720	1461753	0.002377018	5.04E-04	I	0.148903367
10724	1462051	0.002413352	5.16E-04	I	0.14813363
10743	1464484	0.002150479	5.19E-04	I	0.152820417
10756	1464856	0.002006238	5.00E-04	I	0.152705648
10783	1466131	0.002245472	5.66E-04	I	0.148542232
10806	1466664	0.002013023	6.12E-04	I	0.185446384
10812	1466858	0.00202156	6.21E-04	I	0.189084447
10816	1467904	0.001895486	5.71E-04	I	0.192487779
10828	1469317	0.001570014	4.91E-04	I	0.193578548
10839	1470123	0.001447661	4.93E-04	I	0.199008772
10866	1470829	1.00E-03	2.40E-04	I	0.186037833
10874	1470954	0.001058714	3.33E-04	I	0.185173544
10877	1470992	9.73E-04	3.21E-04	I	0.189301671
10886	1471320	9.94E-04	3.78E-04	I	0.190334856
10914	1476872	6.79E-04	3.11E-04	I	0.215041741
10928	1477409	6.72E-04	2.30E-04	I	0.13096843
10943	1480560	8.14E-04	2.75E-04	I	0.10973008
10948	1480886	8.81E-04	2.80E-04	I	0.105760696
10954	1481384	9.52E-04	2.82E-04	I	0.102054818
10968	1482026	0.001095486	3.28E-04	I	0.114017757
10983	1482702	0.001056525	3.53E-04	I	0.157538081
10994	1483052	0.0010458	2.52E-04	I	0.152307867
11001	1483294	0.00112394	2.62E-04	I	0.147010579
11020	1485279	0.001302326	2.22E-04	I	0.159823009
11033	1485871	0.001332093	2.28E-04	I	0.164095128
11045	1486682	0.001257018	2.28E-04	I	0.169186402
11061	1488117	0.001119781	1.85E-04	I	0.179866987
11071	1488955	0.001107086	1.82E-04	I	0.181065994
11080	1489391	0.00108104	1.94E-04	I	0.184072972
11091	1489564	9.06E-04	1.43E-04	I	0.18853363
11107	1490248	8.37E-04	8.28E-05	I	0.120337348
11122	1491340	8.27E-04	8.29E-05	I	0.118113046
11131	1492994	7.84E-04	7.53E-05	I	0.121432348
11149	1496138	5.72E-04	5.94E-05	I	0.073082172
11163	1496616	5.52E-04	5.84E-05	I	0.051794496
11170	1497056	5.56E-04	6.42E-05	I	0.0524427
11182	1497742	5.86E-04	6.48E-05	I	0.046593978
11205	1500682	8.01E-04	1.89E-04	I	0.094750851
11216	1501442	9.54E-04	2.41E-04	I	0.097630364
11217	1502230	9.58E-04	2.41E-04	I	0.097329765
11227	1502628	8.77E-04	2.34E-04	I	0.102806029
11240	1503215	9.08E-04	2.47E-04	I	0.102769834
11246	1503258	9.18E-04	2.47E-04	I	0.101048706
11250	1503274	8.95E-04	2.44E-04	I	0.100280197
11258	1503336	8.31E-04	2.90E-04	I	0.125877472
11265	1503628	8.68E-04	2.91E-04	I	0.155187467
11281	1504465	8.30E-04	2.97E-04	I	0.156970833
11300	1508960	5.61E-04	1.71E-04	I	0.156799287
11312	1511668	4.78E-04	1.17E-04	I	0.182802105
11317	1512197	5.81E-04	1.30E-04	I	0.173794013
11323	1512666	6.49E-04	1.31E-04	I	0.163239348
11336	1514377	7.01E-04	1.76E-04	I	0.14940286
11342	1515093	6.86E-04	1.76E-04	I	0.151679303
11347	1515270	6.96E-04	1.78E-04	I	0.149491576
11358	1516362	8.15E-04	1.32E-04	I	0.115062261
11363	1517429	7.49E-04	1.24E-04	I	0.073120497
11374	1517790	7.16E-04	1.03E-04	I	0.077620644
11379	1518031	7.97E-04	1.06E-04	I	0.074168093
11388	1519805	7.55E-04	1.06E-04	I	0.061223629
11393	1520100	6.52E-04	9.30E-05	I	0.050566624
11401	1520733	6.12E-04	9.21E-05	I	0.050950921
11410	1521048	4.41E-04	2.76E-05	I	0.053233013
11412	1521074	4.10E-04	2.50E-05	I	0.054076404
11416	1522530	3.78E-04	2.33E-05	I	0.057611482
11426	1523848	2.45E-04	1.73E-05	I	0.064975162
11428	1523904	2.22E-04	1.56E-05	I	0.068498665
11430	1524278	1.91E-04	1.56E-05	I	0.072857425
11435	1524619	1.11E-04	1.30E-05	I	0.094479937
11439	1526043	3.66E-05	0	I	0.017647059
11439	1526043	3.20E-05	0	I	0.018487395
11445	1546809	3.48E-05	5.97E-06	I	0.051262775
11458	1547517	5.13E-04	1.95E-05	I	0.183538234
11469	1547765	7.02E-04	8.46E-05	I	0.197785118
11476	1548105	8.24E-04	1.01E-04	I	0.185458632
11486	1548612	9.96E-04	1.44E-04	I	0.170202301
11488	1548704	0.001022599	1.46E-04	I	0.167013618
11494	1548976	0.001115404	1.58E-04	I	0.191733375
11494	1548976	0.001115404	1.58E-04	I	0.191733375
11494	1548976	0.001115404	1.58E-04	I	0.191733375
11494	1548976	0.001115404	1.58E-04	I	0.191733375
11497	1549002	0.001080602	1.53E-04	I	0.195671256
11518	1550434	8.38E-04	2.50E-04	I	0.183061001
11545	1552741	8.91E-04	2.98E-04	I	0.146867809
11562	1557984	0.001023256	3.17E-04	I	0.148225999
11584	1558574	0.001061997	2.82E-04	I	0.158853371
11593	1558959	0.001137948	2.83E-04	I	0.155423424
11599	1559331	0.001045144	2.71E-04	I	0.128287882
11600	1559359	0.001067688	2.71E-04	I	0.126805734
11605	1559538	0.001107962	2.80E-04	I	0.123739658
11608	1559662	0.001121751	2.85E-04	I	0.122361918
11613	1559776	0.001236881	2.95E-04	I	0.123684526
11629	1560827	0.001090889	1.92E-04	I	0.109571982
11654	1563888	9.99E-04	9.37E-05	I	0.109731922
11665	1564797	7.54E-04	5.85E-05	I	0.099344277
11685	1567071	8.12E-04	1.60E-04	I	0.079897403
11700	1568173	9.28E-04	1.89E-04	I	0.089132944
11708	1568291	0.001039672	2.43E-04	I	0.099082065
11711	1568312	0.001071409	2.50E-04	I	0.101073358
11726	1570689	0.00111606	2.60E-04	I	0.098978058
11739	1571646	0.001220027	2.58E-04	I	0.094460305
11749	1572147	0.00122156	2.68E-04	I	0.088151105
11757	1572402	0.001131819	2.60E-04	I	0.091958641
11771	1574114	0.001070315	2.46E-04	I	0.092333596
11777	1574538	0.001114966	2.46E-04	I	0.090707701
11796	1575674	0.001027415	1.50E-04	I	0.085072747
11816	1576329	0.001032886	2.00E-04	I	0.073837472
11834	1579708	0.001122408	1.92E-04	I	0.105979379
11851	1580845	0.00141067	3.06E-04	I	0.127962471
11868	1581486	0.001573297	3.10E-04	I	0.133930687
11880	1581763	0.001482681	3.07E-04	I	0.138958575
11885	1581991	0.001366019	2.87E-04	I	0.144392167
11885	1581991	0.001366019	2.87E-04	I	0.144392167
11891	1582325	0.001277811	2.86E-04	I	0.149147383
11895	1582487	0.001223967	2.86E-04	I	0.152713628
11907	1583083	0.001042955	2.74E-04	I	0.164951789
11919	1583772	8.19E-04	1.91E-04	I	0.190808254
11929	1583942	6.17E-04	1.45E-04	I	0.16327636
11944	1584170	2.75E-04	2.38E-05	I	0.129426081
11951	1585033	2.71E-05	0	I	0.02745098
11957	1604578	7.07E-05	5.03E-06	I	0.036694572
11962	1605121	1.42E-04	9.30E-06	I	0.063271239
11967	1605901	1.92E-04	1.36E-05	I	0.053025163
11968	1605942	2.01E-04	1.36E-05	I	0.051331121
11971	1606051	2.19E-04	1.61E-05	I	0.049615644
11981	1606884	4.21E-04	2.04E-05	I	0.087340984
11991	1609346	6.23E-04	9.33E-05	I	0.143114835
11999	1609729	7.38E-04	9.75E-05	I	0.130194331
12007	1609886	8.15E-04	0.00011614	I	0.122184943
12009	1610003	8.33E-04	1.19E-04	I	0.120079955
12014	1610323	7.72E-04	1.15E-04	I	0.125453926
12024	1610823	7.54E-04	1.11E-04	I	0.122929608
12033	1611476	7.54E-04	1.08E-04	I	0.124003924
12035	1611519	7.58E-04	1.08E-04	I	0.123475606
12038	1611617	7.40E-04	1.05E-04	I	0.125495385
12050	1612432	6.05E-04	1.02E-04	I	0.128959358
12063	1613444	4.21E-04	3.14E-05	I	0.05761867
12075	1615421	3.91E-04	2.89E-05	I	0.066537172
12090	1619881	4.03E-04	3.80E-05	I	0.066357855
12105	1621718	5.78E-04	1.38E-04	I	0.083461033
12116	1622968	6.72E-04	1.44E-04	I	0.077196133
12129	1623283	7.53E-04	1.61E-04	I	0.079245074
12150	1624200	8.28E-04	2.01E-04	I	0.072415001
12165	1624667	0.001008591	2.38E-04	I	0.069925514
12172	1625424	0.001107086	2.41E-04	I	0.067350388
12183	1626143	0.001217839	2.48E-04	I	0.064962435
12192	1626461	0.001276498	2.46E-04	I	0.06365479
12201	1626689	0.001253516	2.45E-04	I	0.061810649
12212	1626975	0.001187196	2.23E-04	I	0.061925041
12233	1627618	0.00109461	1.40E-04	I	0.050825128
12250	1628657	0.001057401	1.63E-04	I	0.051136746
12265	1629394	0.001056525	2.38E-04	I	0.062963949
12287	1630928	0.001038577	0.0001994	I	0.069282853
12313	1633753	0.001053899	2.14E-04	I	0.070042986
12333	1634909	0.00125067	4.38E-04	I	0.079308961
12351	1636397	0.001217182	4.47E-04	I	0.07717034
12368	1637593	0.001356607	5.03E-04	I	0.076523062
12379	1637885	0.001408044	5.22E-04	I	0.074903877
12384	1638004	0.001389658	5.17E-04	I	0.075644228
12392	1638195	0.001289412	4.97E-04	I	0.076918642
12405	1638664	0.001319398	4.96E-04	I	0.078746156
12412	1639054	0.001185663	4.03E-04	I	0.071363026
12417	1639475	0.001078413	4.01E-04	I	0.071118548
12429	1640016	8.69E-04	3.50E-04	I	0.073317021
12443	1640722	5.74E-04	1.23E-04	I	0.057933544
12452	1641543	4.31E-04	1.06E-04	I	0.055370571
12462	1641969	2.15E-04	4.99E-05	I	0.051901447
12469	1644477	1.01E-04	2.93E-05	I	0.066513662
12470	1644510	9.63E-05	2.93E-05	I	0.068402116
12470	1644510	9.63E-05	2.93E-05	I	0.068402116
12481	1660677	8.67E-05	7.33E-05	I	0.176329291
12484	1660874	1.62E-04	9.67E-05	I	0.164561334
12484	1660874	1.62E-04	9.67E-05	I	0.164561334
12490	1661040	3.40E-04	1.09E-04	I	0.160003139
12498	1663367	4.58E-04	1.54E-04	I	0.128404576
12507	1664110	6.80E-04	1.58E-04	I	0.135887454
12514	1664357	7.53E-04	1.74E-04	I	0.12690765
12521	1665244	8.82E-04	2.82E-04	I	0.153856923
12534	1665939	0.001047551	3.65E-04	I	0.151868356
12541	1666144	0.001163776	4.58E-04	I	0.144337752
12557	1667370	0.001319836	4.23E-04	I	0.136169634
12569	1668035	0.001359672	4.12E-04	I	0.132980153
12570	1668098	0.001364268	4.13E-04	I	0.132650195
12594	1669136	0.001517483	6.43E-04	I	0.161524699
12609	1670200	0.001598468	6.04E-04	I	0.167512347
12622	1670849	0.001438906	6.40E-04	I	0.166155753
12634	1671367	0.001505663	6.32E-04	I	0.16697625
12645	1671905	0.001443283	5.26E-04	I	0.152605267
12663	1673286	0.001344569	4.63E-04	I	0.148555467
12677	1673837	0.001350041	4.18E-04	I	0.145059613
12697	1674819	0.001222216	5.02E-04	I	0.139250276
12709	1676378	0.001154802	4.93E-04	I	0.139747942
12716	1676903	0.001229658	4.99E-04	I	0.135952357
12737	1679260	9.44E-04	3.60E-04	I	0.084902384
12757	1680344	0.001046457	4.22E-04	I	0.070460953
12768	1681588	0.001108618	3.94E-04	I	0.067061213
12786	1683169	0.001284596	4.41E-04	I	0.071365439
12803	1684371	0.001414391	5.33E-04	I	0.084392696
12814	1684778	0.001478523	5.28E-04	I	0.08979196
12827	1685980	0.001487059	4.91E-04	I	0.104616112
12843	1686368	0.001520547	3.78E-04	I	0.115397934
12857	1687014	0.00178539	4.40E-04	I	0.131835015
12866	1687310	0.001755404	4.94E-04	I	0.133499829
12877	1687804	0.001790205	4.76E-04	I	0.129501369
12894	1689021	0.001551409	4.11E-04	I	0.139249634
12907	1690359	0.001596498	4.83E-04	I	0.131597911
12926	1691393	0.001361642	4.54E-04	I	0.131482631
12942	1692017	0.001211053	3.84E-04	I	0.123652135
12954	1693487	0.00116093	5.12E-04	I	0.116734182
12965	1694417	0.00111409	5.26E-04	I	0.102173894
12980	1695632	0.001072066	6.22E-04	I	0.109146012
12996	1696588	8.35E-04	5.75E-04	I	0.076308702
13005	1698169	9.02E-04	5.78E-04	I	0.079114405
13018	1699401	8.92E-04	5.18E-04	I	0.075119135
13028	1700419	9.53E-04	6.33E-04	I	0.086855374
13041	1701106	8.33E-04	5.50E-04	I	0.094913606
13053	1702298	8.12E-04	5.27E-04	I	0.0976796
13061	1702903	7.89E-04	5.10E-04	I	0.100540857
13069	1703867	7.26E-04	3.67E-04	I	0.105483012
13075	1704053	6.61E-04	3.41E-04	I	0.110873254
13087	1705355	5.90E-04	2.41E-04	I	0.082732481
13098	1706123	5.68E-04	2.46E-04	I	0.086836978
13110	1707132	5.39E-04	1.90E-04	I	0.077081207
13117	1707648	4.87E-04	1.64E-04	I	0.078028507
13124	1709629	3.63E-04	4.73E-05	I	0.038864062
13137	1711203	3.85E-04	9.66E-05	I	0.047454843
13145	1711983	3.35E-04	9.23E-05	I	0.05023475
13161	1713211	4.78E-04	2.52E-04	I	0.050605761
13173	1715598	6.40E-04	3.91E-04	I	0.049144052
13177	1715673	6.93E-04	4.49E-04	I	0.063799805
13187	1717320	7.16E-04	5.09E-04	I	0.069992378
13205	1718079	8.74E-04	6.13E-04	I	0.075039343
13222	1718990	9.38E-04	6.61E-04	I	0.068698336
13231	1720526	9.95E-04	6.63E-04	I	0.068667605
13231	1720526	9.95E-04	6.63E-04	I	0.068667605
13245	1721344	0.001019097	6.76E-04	I	0.08113135
13246	1721370	0.001009904	6.76E-04	I	0.081482856
13260	1721802	9.18E-04	5.45E-04	I	0.085715769
13278	1722651	8.46E-04	4.12E-04	I	0.092664631
13289	1723016	9.06E-04	3.73E-04	I	0.086251255
13310	1725858	0.00109067	4.13E-04	I	0.0876614
13327	1728564	1.00E-03	3.43E-04	I	0.082269311
13343	1729296	9.39E-04	3.41E-04	I	0.105453057
13360	1730167	0.001057401	3.84E-04	I	0.099172055
13369	1730455	0.001239726	5.27E-04	I	0.087603537
13381	1731218	0.00126643	4.89E-04	I	0.075124346
13386	1731690	0.001332312	5.27E-04	I	0.076103067
13393	1732088	0.001300356	4.93E-04	I	0.077088292
13409	1733542	0.001320055	6.02E-04	I	0.085841978
13428	1734285	0.001300137	6.60E-04	I	0.087552674
13447	1735776	0.001107524	5.98E-04	I	0.087345549
13455	1736527	0.00102435	5.41E-04	I	0.091531825
13466	1737966	9.90E-04	4.90E-04	I	0.077414768
13477	1738598	8.01E-04	4.46E-04	I	0.082325589
13487	1739195	6.44E-04	3.04E-04	I	0.098389529
13498	1739825	5.75E-04	2.79E-04	I	0.100750891
13508	1740379	6.05E-04	2.43E-04	I	0.097732763
13515	1740998	5.77E-04	2.44E-04	I	0.099940864
13526	1742221	4.80E-04	1.68E-04	I	0.097827747
13539	1745232	3.96E-04	9.42E-05	I	0.08663285
13553	1746251	4.52E-04	5.96E-05	I	0.067559407
13564	1748533	5.53E-04	9.75E-05	I	0.056155043
13575	1750004	5.52E-04	1.23E-04	I	0.053990764
13582	1750434	6.11E-04	1.23E-04	I	0.051909782
13589	1750886	6.61E-04	1.22E-04	I	0.049202543
13598	1751219	6.59E-04	1.25E-04	I	0.051397613
13603	1751570	5.64E-04	1.23E-04	I	0.049569835
13606	1751757	5.50E-04	1.22E-04	I	0.050429946
13616	1752731	6.26E-04	1.35E-04	I	0.048638066
13627	1753878	7.44E-04	1.68E-04	I	0.060356584
13638	1754729	6.64E-04	1.65E-04	I	0.062111409
13646	1755399	5.24E-04	1.25E-04	I	0.071423841
13651	1758749	4.70E-04	9.77E-05	I	0.079388586
13659	1758879	4.21E-04	9.69E-05	I	0.084079549
13667	1759003	3.81E-04	1.02E-04	I	0.092272119
13674	1759588	3.51E-04	9.94E-05	I	0.094033702
13674	1759588	3.56E-04	9.94E-05	I	0.093271315
13678	1759763	3.87E-04	1.05E-04	I	0.088674345
13692	1764872	3.51E-04	8.08E-05	I	0.066632901
13701	1767579	2.15E-04	4.52E-05	I	0.038621004
13703	1767792	1.89E-04	4.18E-05	I	0.036698801
13703	1767792	1.89E-04	4.18E-05	I	0.036698801
13705	1767945	2.07E-04	4.18E-05	I	0.035750206
13707	1768133	1.93E-04	4.09E-05	I	0.037243249
13709	1768217	1.57E-04	3.58E-05	I	0.023098853
13716	1768884	2.83E-04	1.05E-04	I	0.200900528
13719	1768990	3.30E-04	1.07E-04	I	0.188258785
13727	1775424	3.79E-04	1.26E-04	I	0.245722027
13745	1777503	5.69E-04	2.07E-04	I	0.248451303
13751	1778479	6.13E-04	2.18E-04	I	0.237305123
13760	1778644	7.94E-04	3.80E-04	I	0.197264501
13768	1778944	9.15E-04	5.40E-04	I	0.212077835
13774	1779282	9.49E-04	5.50E-04	I	0.208648295
13776	1779401	9.80E-04	5.51E-04	I	0.20584632
13778	1779580	0.001006402	5.51E-04	I	0.203524064
13789	1780555	9.66E-04	4.91E-04	I	0.176045561
13793	1780778	0.001004651	4.93E-04	I	0.183204308
13800	1781097	9.34E-04	4.71E-04	I	0.162124641
13817	1782687	7.81E-04	3.63E-04	I	0.139784817
13828	1784856	8.16E-04	4.01E-04	I	0.138553513
13848	1787082	8.29E-04	2.40E-04	I	0.141368626
13866	1789172	8.19E-04	1.05E-04	I	0.080341478
13878	1790179	9.23E-04	2.47E-04	I	0.097262374
13890	1790533	0.001042298	3.89E-04	I	0.095710693
13895	1790792	0.001033981	4.77E-04	I	0.111489762
13914	1791947	0.001183912	4.87E-04	I	0.113698482
13918	1792229	0.00110249	4.87E-04	I	0.104839152
13933	1793002	0.001323557	5.77E-04	I	0.098722161
13940	1793349	0.001242572	5.75E-04	I	0.099463138
13963	1795230	0.00137565	5.68E-04	I	0.093684684
13982	1795895	0.001286129	6.26E-04	I	0.103763738
14006	1797713	0.001507633	7.79E-04	I	0.105483107
14024	1799146	0.0015142	7.43E-04	I	0.09297546
14047	1799917	0.001792175	9.55E-04	I	0.092584361
14053	1800321	0.001828947	9.17E-04	I	0.082042501
14070	1801190	0.001607442	8.99E-04	I	0.078645722
14079	1801543	0.001756279	9.69E-04	I	0.081586126
14098	1802052	0.001589275	9.20E-04	I	0.083368557
14112	1802779	0.001784733	9.93E-04	I	0.079465618
14140	1803593	0.001895923	0.00122172	I	0.079153546
14164	1806796	0.002065992	0.001365807	I	0.076857099
14185	1808015	0.001850834	0.001262714	I	0.075111275
14196	1808456	0.001693461	0.001157665	I	0.078260962
14224	1809806	0.001427524	8.51E-04	I	0.075134395
14232	1810026	0.001444378	8.37E-04	I	0.076508342
14244	1810409	0.001476115	8.57E-04	I	0.075234906
14257	1810734	0.001398194	7.86E-04	I	0.070138403
14276	1812887	0.001551409	8.91E-04	I	0.069391651
14287	1813429	0.001328591	8.18E-04	I	0.073385738
14299	1813856	9.96E-04	5.45E-04	I	0.077450629
14320	1815197	8.07E-04	3.87E-04	I	0.078918853
14334	1816024	8.07E-04	3.37E-04	I	0.070056365
14339	1816458	9.02E-04	3.78E-04	I	0.07007126
14353	1817215	7.39E-04	3.30E-04	I	0.06758749
14360	1817601	6.67E-04	2.94E-04	I	0.067138674
14371	1820375	7.32E-04	3.28E-04	I	0.108385045
14386	1821390	7.16E-04	3.51E-04	I	0.106927245
14407	1825808	6.47E-04	2.76E-04	I	0.121151339
14410	1826036	6.66E-04	2.77E-04	I	0.119058969
14418	1826657	8.17E-04	3.26E-04	I	0.108828845
14435	1827274	9.24E-04	3.36E-04	I	0.096719859
14450	1828586	9.28E-04	3.71E-04	I	0.097099593
14456	1829324	8.52E-04	3.21E-04	I	0.099629965
14460	1829511	8.96E-04	3.81E-04	I	0.098483489
14467	1829787	0.001024569	4.43E-04	I	0.08871554
14473	1830217	9.32E-04	4.52E-04	I	0.059591625
14487	1830662	9.35E-04	4.46E-04	I	0.062949243
14503	1831942	8.97E-04	4.13E-04	I	0.064017722
14515	1833321	0.00105171	6.08E-04	I	0.067321278
14529	1834770	9.96E-04	5.62E-04	I	0.070438579
14542	1836841	8.24E-04	5.08E-04	I	0.071970741
14551	1837219	7.26E-04	4.50E-04	I	0.07243144
14563	1838072	8.23E-04	4.83E-04	I	0.08080694
14574	1838524	9.37E-04	4.39E-04	I	0.09749445
14591	1841302	0.001015595	4.16E-04	I	0.121613854
14606	1842573	0.001156772	4.99E-04	I	0.108890464
14623	1843849	0.001257674	5.73E-04	I	0.104887446
14632	1844099	0.001202079	6.15E-04	I	0.099956813
14644	1844895	0.001092859	4.64E-04	I	0.107065878
14660	1845534	0.001142544	5.16E-04	I	0.098474251
14662	1845679	0.001130944	5.15E-04	I	0.098176381
14669	1845799	0.001165527	5.22E-04	I	0.096767705
14679	1846162	0.001069658	4.88E-04	I	0.093342909
14685	1846205	9.11E-04	4.72E-04	I	0.077844317
14695	1846365	7.05E-04	4.33E-04	I	0.053189124
14709	1848640	5.23E-04	2.84E-04	I	0.062472509
14721	1849223	3.55E-04	1.92E-04	I	0.059301236
14723	1849236	3.00E-04	1.10E-04	I	0.057973927
14727	1849367	2.37E-04	6.42E-05	I	0.032037672
14737	1851369	9.11E-05	1.01E-05	I	0.048020844
14739	1851609	8.19E-05	9.21E-06	I	0.05194183
14743	1852246	2.43E-05	1.71E-06	I	0.107857867
14744	1867909	4.60E-06	0	I	0.011764706
14747	1868657	5.03E-05	5.12E-06	I	0.081762152
14754	1869118	1.40E-04	2.23E-05	I	0.053314993
14756	1869375	1.74E-04	2.32E-05	I	0.056177873
14759	1869520	2.41E-04	2.40E-05	I	0.108683614
14769	1870958	4.83E-04	6.78E-05	I	0.188399868
14777	1872154	5.77E-04	6.95E-05	I	0.16803432
14786	1872365	7.60E-04	2.24E-04	I	0.15129356
14797	1873160	9.15E-04	3.32E-04	I	0.139947986
14800	1873299	0.001019097	4.02E-04	I	0.130250132
14808	1873876	0.001117373	4.51E-04	I	0.127975428
14824	1874700	0.001298824	5.37E-04	I	0.125836822
14842	1875627	0.001390971	6.25E-04	I	0.124539895
14852	1876439	0.00150632	7.13E-04	I	0.116867973
14858	1877238	0.001512886	7.34E-04	I	0.109634986
14880	1878256	0.001538276	7.43E-04	I	0.084136412
14896	1878899	0.001575267	8.31E-04	I	0.08575143
14921	1880086	0.001611819	6.91E-04	I	0.077611974
14940	1881862	0.001579644	5.84E-04	I	0.074421589
14943	1882099	0.001475239	5.14E-04	I	0.076162215
14951	1882333	0.001372367	4.64E-04	I	0.07387893
14963	1882801	0.001145171	3.74E-04	I	0.066158192
14974	1883657	9.64E-04	2.68E-04	I	0.061589488
14982	1884001	8.14E-04	1.80E-04	I	0.067032457
14986	1884148	7.40E-04	1.58E-04	I	0.070185813
14997	1884414	4.73E-04	1.04E-04	I	0.063830878
15005	1884796	3.42E-04	1.53E-05	I	0.054246423
15022	1885325	1.23E-04	8.57E-07	I	0.058452441
15030	1897890	2.21E-05	0	I	0.049411765
15054	1898727	3.50E-04	1.70E-05	I	0.044550928
15054	1898727	3.50E-04	1.70E-05	I	0.044550928
15055	1898729	3.64E-04	1.70E-05	I	0.043952207
15056	1898734	3.78E-04	1.70E-05	I	0.043393994
15063	1898814	5.74E-04	6.77E-05	I	0.109290469
15064	1898821	5.74E-04	6.86E-05	I	0.109163041
15078	1898955	9.87E-04	9.16E-05	I	0.133959065
15081	1900883	0.001014063	9.84E-05	I	0.131114819
15085	1902450	0.001050178	9.92E-05	I	0.128160381
15091	1902605	0.001121532	1.09E-04	I	0.124720213
15118	1904634	8.21E-04	9.24E-05	I	0.148993767
15118	1904634	8.21E-04	9.24E-05	I	0.148993767
15120	1904657	8.29E-04	9.24E-05	I	0.14882543
15126	1904863	9.47E-04	1.47E-04	I	0.135278963
15139	1906436	9.02E-04	1.02E-04	I	0.117464243
15146	1907575	0.001097674	1.20E-04	I	0.120263742
15171	1912231	0.001029166	1.88E-04	I	0.08561694
15186	1913709	0.001239726	2.92E-04	I	0.090051633
15208	1914282	0.001792394	5.55E-04	I	0.113462297
15226	1915192	0.001992668	6.97E-04	I	0.103603867
15233	1915504	0.002050014	7.89E-04	I	0.111732909
15242	1916104	0.002218988	8.92E-04	I	0.114369449
15243	1916152	0.002197319	8.92E-04	I	0.114676893
15248	1916311	0.002065554	8.37E-04	I	0.118353165
15262	1916695	0.002006895	8.38E-04	I	0.115396185
15272	1916909	0.001875568	8.23E-04	I	0.112667216
15295	1917746	0.001649248	7.42E-04	I	0.114782366
15318	1919562	0.001546594	6.38E-04	I	0.112259508
15337	1922634	9.67E-04	3.74E-04	I	0.086142155
15349	1923939	6.73E-04	2.23E-04	I	0.108029478
15353	1924047	5.89E-04	1.30E-04	I	0.079104413
15363	1924268	4.20E-04	2.64E-05	I	0.036768542
15363	1924268	4.20E-04	2.64E-05	I	0.036768542
15363	1924268	4.20E-04	2.64E-05	I	0.036768542
15371	1924703	3.27E-04	1.96E-05	I	0.034063521
15374	1924950	2.62E-04	1.61E-05	I	0.027451122
15386	1925679	1.44E-04	6.76E-06	I	0.031590003
15397	1926040	9.19E-06	0	I	0.011764706
15406	1948557	1.36E-04	4.42E-05	I	0.067561086
15411	1948797	2.27E-04	4.85E-05	I	0.065691885
15415	1949053	2.63E-04	5.36E-05	I	0.05912275
15415	1949053	2.68E-04	5.36E-05	I	0.058477651
15420	1949190	3.00E-04	5.53E-05	I	0.054172426
15429	1950392	4.03E-04	6.55E-05	I	0.048436166
15432	1951709	4.30E-04	6.81E-05	I	0.047521146
15438	1952699	4.98E-04	7.06E-05	I	0.045528604
15444	1953382	5.52E-04	7.57E-05	I	0.043440223
15447	1953445	5.84E-04	7.57E-05	I	0.041942534
15477	1955711	7.70E-04	4.93E-05	I	0.071541534
15489	1956996	7.61E-04	4.68E-05	I	0.068003112
15495	1957649	7.52E-04	4.34E-05	I	0.069253452
15496	1957673	7.47E-04	4.42E-05	I	0.069500089
15503	1958362	7.29E-04	4.34E-05	I	0.070862022
15512	1958522	6.26E-04	3.32E-05	I	0.077545871
15515	1958596	5.99E-04	3.06E-05	I	0.079543187
15521	1958698	5.31E-04	2.81E-05	I	0.085263466
15527	1958787	4.77E-04	2.29E-05	I	0.092136879
15530	1958845	4.45E-04	2.29E-05	I	0.097185873
15552	1959506	1.22E-04	5.12E-06	I	0.023102958
15560	1961364	4.07E-05	3.42E-06	I	0.020515946
15562	1962554	1.38E-05	1.71E-06	I	0.010711434
15562	1962554	1.38E-05	8.57E-07	I	0.011207551
15568	1973832	2.67E-05	7.66E-06	I	0.032241425
15577	1974249	1.44E-04	5.90E-05	I	0.21131133
15579	1974309	1.75E-04	5.99E-05	I	0.193197366
15579	1974309	1.75E-04	5.99E-05	I	0.193197366
15583	1974630	2.28E-04	7.44E-05	I	0.163818176
15588	1974725	2.82E-04	1.04E-04	I	0.143915479
15598	1977858	4.78E-04	1.52E-04	I	0.107607813
15599	1977865	4.82E-04	1.52E-04	I	0.10697982
15607	1978280	6.24E-04	1.81E-04	I	0.098249364
15613	1979094	7.41E-04	1.81E-04	I	0.095323314
15626	1979832	8.55E-04	2.22E-04	I	0.096978002
15643	1981389	8.24E-04	2.22E-04	I	0.059945673
15646	1981599	8.33E-04	2.23E-04	I	0.06299048
15646	1981599	8.33E-04	2.23E-04	I	0.06299048
15654	1982667	8.38E-04	2.10E-04	I	0.062474543
15671	1983703	0.00101078	2.75E-04	I	0.073706749
15684	1984024	8.69E-04	2.70E-04	I	0.076423003
15689	1984149	9.31E-04	2.72E-04	I	0.074151011
15703	1987458	8.86E-04	2.71E-04	I	0.076882203
15710	1988049	7.79E-04	2.71E-04	I	0.076611448
15730	1988892	7.83E-04	2.60E-04	I	0.080718966
15747	1991279	8.64E-04	2.20E-04	I	0.084166159
15749	1991321	8.25E-04	2.19E-04	I	0.082369071
15755	1991797	9.49E-04	2.25E-04	I	0.117488269
15772	1993636	0.001115622	2.29E-04	I	0.125170301
15785	1994287	9.30E-04	1.50E-04	I	0.128923838
15801	1996484	0.001156334	1.29E-04	I	0.137480399
15817	1997272	0.001242791	1.51E-04	I	0.145992707
15833	1997722	0.001285691	1.81E-04	I	0.140586656
15836	1997980	0.001308673	1.96E-04	I	0.139043879
15850	1999132	0.001177784	1.74E-04	I	0.139692841
15867	1999997	0.001096799	1.76E-04	I	0.14248048
15875	2000366	0.001210834	1.92E-04	I	0.135864891
15899	2001522	0.001520109	2.51E-04	I	0.116807512
15924	2004107	0.001587086	3.46E-04	I	0.143896677
15925	2004120	0.001545937	3.30E-04	I	0.145440726
15939	2005260	0.001266648	3.08E-04	I	0.147013583
15950	2005710	0.001112777	2.84E-04	I	0.144409299
15961	2006514	9.73E-04	2.26E-04	I	0.156422934
15963	2006526	9.41E-04	2.11E-04	I	0.159847187
15966	2006544	9.27E-04	1.96E-04	I	0.162956233
15973	2006701	8.40E-04	1.82E-04	I	0.173253136
15981	2006894	7.26E-04	1.66E-04	I	0.186956893
15999	2007294	2.92E-04	9.97E-05	I	0.24701491
16014	2034906	3.15E-05	4.21E-06	I	0.030467846
16023	2035161	2.30E-04	9.19E-05	I	0.203899773
16023	2035161	2.34E-04	9.19E-05	I	0.201713541
16023	2035161	2.34E-04	9.19E-05	I	0.201713541
16023	2035161	2.34E-04	9.19E-05	I	0.201713541
16023	2035161	2.34E-04	9.19E-05	I	0.201713541
16031	2035716	3.53E-04	1.08E-04	I	0.160425189
16038	2040422	5.08E-04	2.04E-04	I	0.155305281
16050	2040923	7.75E-04	4.14E-04	I	0.1713154
16062	2041361	9.03E-04	4.31E-04	I	0.158662535
16065	2042081	8.71E-04	4.27E-04	I	0.161712979
16076	2042440	7.26E-04	3.40E-04	I	0.138756431
16077	2042584	7.21E-04	3.40E-04	I	0.139235327
16077	2042584	7.21E-04	3.40E-04	I	0.139235327
16080	2042740	7.44E-04	3.41E-04	I	0.136784333
16080	2042740	7.44E-04	3.41E-04	I	0.136784333
16088	2042977	6.26E-04	3.24E-04	I	0.148912841
16094	2043311	4.71E-04	2.29E-04	I	0.150062109
16107	2043896	2.04E-04	1.87E-05	I	0.037454426
16118	2045542	7.62E-05	1.71E-06	I	0.035944477
16120	2048610	1.16E-04	3.42E-06	I	0.036721466
16141	2055354	3.93E-04	1.77E-04	I	0.112913819
16149	2055586	5.86E-04	4.01E-04	I	0.080903729
16164	2056028	9.09E-04	5.54E-04	I	0.097190236
16183	2057087	0.001160055	6.63E-04	I	0.085147211
16184	2057097	0.00118435	6.65E-04	I	0.085474531
16185	2057099	0.00119814	6.65E-04	I	0.084969397
16191	2057321	0.001319179	7.17E-04	I	0.088617681
16201	2057601	0.001528208	7.91E-04	I	0.090208556
16206	2057731	0.001586867	8.03E-04	I	0.08822523
16217	2058310	0.001757155	9.31E-04	I	0.114521643
16243	2059016	0.001589932	7.98E-04	I	0.107166542
16260	2062117	0.001556443	5.82E-04	I	0.128434159
16286	2063708	0.001404104	4.52E-04	I	0.12576525
16313	2065585	0.001382873	4.30E-04	I	0.145763144
16321	2065847	0.001544186	4.86E-04	I	0.172881865
16331	2066636	0.0016742	5.23E-04	I	0.168162067
16350	2067423	0.001893516	5.30E-04	I	0.169062097
16374	2068500	0.001964651	5.07E-04	I	0.181968547
16389	2069338	0.002044542	5.48E-04	I	0.177551242
16408	2070639	0.002006019	4.83E-04	I	0.153343295
16427	2071258	0.002023529	4.67E-04	I	0.154066467
16441	2071975	0.001927223	4.64E-04	I	0.147046641
16461	2072885	0.001919343	4.61E-04	I	0.143374683
16480	2073342	0.001772695	3.78E-04	I	0.139492538
16500	2074456	0.001779261	4.47E-04	I	0.095462942
16520	2075655	0.001817346	4.72E-04	I	0.087537379
16544	2077404	0.001617073	4.20E-04	I	0.06823533
16570	2078631	0.001454446	4.21E-04	I	0.062397632
16588	2079447	0.001387688	3.78E-04	I	0.061834957
16611	2080331	0.001410014	3.99E-04	I	0.088266944
16629	2081335	0.001369083	4.63E-04	I	0.111053346
16646	2081935	0.001572421	5.40E-04	I	0.168780636
16666	2082688	0.001541341	5.29E-04	I	0.171440245
16688	2084205	0.001641587	6.73E-04	I	0.165226254
16716	2085066	0.001703529	6.66E-04	I	0.173258359
16739	2086408	0.001768536	7.55E-04	I	0.171184469
16764	2087683	0.001802025	8.26E-04	I	0.173384033
16784	2088631	0.001883666	9.08E-04	I	0.150835287
16806	2089199	0.002055267	0.001041946	I	0.164796845
16831	2089962	0.001985882	9.69E-04	I	0.157432107
16846	2090665	0.001968153	9.32E-04	I	0.145296954
16867	2091322	0.001801368	8.54E-04	I	0.09954431
16881	2091998	0.001768536	8.90E-04	I	0.102398565
16908	2093221	0.001690834	7.66E-04	I	0.100663711
16927	2094058	0.001468892	6.46E-04	I	0.098994562
16945	2094584	0.001301888	7.22E-04	I	0.136329616
16963	2095680	0.001187196	6.46E-04	I	0.135569779
16978	2096591	0.001061778	5.56E-04	I	0.149809625
16998	2098409	9.02E-04	4.18E-04	I	0.115017868
17014	2098946	8.09E-04	4.08E-04	I	0.118088227
17032	2100803	8.32E-04	3.76E-04	I	0.119836317
17049	2102290	8.56E-04	3.82E-04	I	0.121938188
17059	2103368	8.68E-04	3.53E-04	I	0.115545702
17081	2105022	8.71E-04	3.79E-04	I	0.13565343
17084	2105351	8.39E-04	3.79E-04	I	0.13850609
17090	2105534	7.59E-04	1.52E-04	I	0.080230989
17098	2105774	7.14E-04	1.51E-04	I	0.082814907
17104	2106430	6.40E-04	1.06E-04	I	0.087448688
17110	2106655	5.57E-04	1.01E-04	I	0.092640123
17115	2107007	5.24E-04	9.86E-05	I	0.096847539
17133	2108367	5.67E-04	1.33E-04	I	0.166910054
17155	2115520	7.61E-04	2.37E-04	I	0.184098937
17168	2116182	7.63E-04	2.61E-04	I	0.18195109
17190	2116931	0.001041423	3.78E-04	I	0.215086469
17204	2117650	0.001277155	4.55E-04	I	0.201115767
17220	2118348	0.001534337	4.80E-04	I	0.18362177
17230	2118808	0.001676389	5.62E-04	I	0.185900307
17231	2118817	0.001685363	5.63E-04	I	0.185335404
17235	2119010	0.001761313	5.67E-04	I	0.183230371
17244	2119475	0.001865499	5.77E-04	I	0.176893308
17261	2119977	0.001742709	5.38E-04	I	0.163079828
17283	2120471	0.001506758	4.69E-04	I	0.15388705
17290	2120802	0.001418988	4.35E-04	I	0.160543486
17310	2121544	0.001086293	2.74E-04	I	0.103287361
17327	2124373	9.12E-04	2.03E-04	I	0.092506179
17352	2125710	7.27E-04	1.85E-04	I	0.097785621
17360	2126322	5.71E-04	1.02E-04	I	0.056905324
17361	2126340	5.62E-04	1.01E-04	I	0.057257904
17376	2128387	7.16E-04	2.06E-04	I	0.050575957
17392	2129996	7.22E-04	2.36E-04	I	0.053366418
17403	2130205	6.82E-04	2.19E-04	I	0.05535969
17411	2133043	5.98E-04	1.74E-04	I	0.052824292
17412	2133126	5.74E-04	1.69E-04	I	0.051240981
17422	2133421	5.20E-04	1.63E-04	I	0.04722431
17432	2133710	5.34E-04	1.63E-04	I	0.04601329
17445	2134746	4.94E-04	1.59E-04	I	0.046992181
17450	2135026	5.77E-04	1.65E-04	I	0.047885023
17464	2139366	7.20E-04	1.79E-04	I	0.045400859
17488	2141368	7.33E-04	1.21E-04	I	0.044979845
17499	2142131	6.80E-04	1.32E-04	I	0.080690681
17501	2142137	6.57E-04	1.32E-04	I	0.0825548
17502	2142222	6.61E-04	1.33E-04	I	0.082094579
17503	2142227	6.61E-04	1.34E-04	I	0.082015363
17508	2142306	6.57E-04	1.32E-04	I	0.0825548
17515	2142860	5.81E-04	1.27E-04	I	0.086861566
17519	2143220	5.50E-04	1.24E-04	I	0.089964821
17525	2143373	4.76E-04	1.18E-04	I	0.094030217
17548	2144096	4.85E-04	3.33E-04	I	0.140974076
17562	2152317	2.56E-04	2.87E-04	I	0.177860307
17568	2152567	2.21E-04	2.36E-04	I	0.14820957
17574	2152757	3.04E-04	3.17E-04	I	0.158727697
17575	2152830	3.00E-04	3.16E-04	I	0.159842941
17575	2152830	3.00E-04	3.15E-04	I	0.160027713
17577	2152942	2.81E-04	3.15E-04	I	0.163891191
17583	2154441	3.66E-04	3.15E-04	I	0.150136254
17584	2154451	3.80E-04	3.15E-04	I	0.147770957
17593	2155543	5.39E-04	3.61E-04	I	0.125271159
17602	2159845	3.86E-04	1.33E-04	I	0.089064478
17606	2159886	4.31E-04	1.33E-04	I	0.088694187
17614	2161486	4.92E-04	1.37E-04	I	0.086188251
17623	2161799	4.68E-04	6.33E-05	I	0.048621234
17623	2161799	4.68E-04	6.42E-05	I	0.048549884
17627	2163569	4.99E-04	6.76E-05	I	0.047410177
17636	2164445	7.47E-04	9.61E-05	I	0.064076755
17651	2167220	8.42E-04	1.00E-04	I	0.068397663
17658	2168004	9.44E-04	1.79E-04	I	0.081309438
17670	2168490	8.55E-04	1.38E-04	I	0.08788022
17681	2169375	9.67E-04	2.02E-04	I	0.087249581
17694	2169670	0.001062216	2.36E-04	I	0.082802984
17706	2170388	0.001041642	2.34E-04	I	0.082614293
17710	2171330	0.001000274	2.32E-04	I	0.081633029
17723	2172491	0.001178003	4.68E-04	I	0.110118826
17730	2172639	0.001227031	5.32E-04	I	0.105807053
17748	2173670	0.001078413	5.86E-04	I	0.11606258
17764	2174569	9.79E-04	5.84E-04	I	0.116858238
17786	2176595	0.001127442	5.44E-04	I	0.105563122
17798	2177014	0.001146703	5.47E-04	I	0.103997879
17818	2178644	0.001164651	4.87E-04	I	0.100523384
17838	2180219	0.00112197	6.03E-04	I	0.125192031
17853	2180433	0.001188509	6.41E-04	I	0.120395447
17863	2180887	0.001304733	6.43E-04	I	0.117323511
17885	2182184	0.001241259	4.48E-04	I	0.0919381
17892	2182752	0.001214337	3.83E-04	I	0.097429175
17909	2183443	0.001206238	3.39E-04	I	0.079187626
17922	2184104	0.001193324	4.27E-04	I	0.097848601
17948	2185458	0.001105773	4.46E-04	I	0.09599004
17963	2186356	0.001110369	4.40E-04	I	0.096446425
17973	2186671	9.80E-04	4.35E-04	I	0.102362081
17982	2188089	8.69E-04	2.80E-04	I	0.071877242
17992	2188789	7.39E-04	2.40E-04	I	0.07799763
18000	2189422	6.05E-04	2.32E-04	I	0.081245842
18009	2189908	4.91E-04	1.90E-04	I	0.090474434
18013	2190077	4.37E-04	1.88E-04	I	0.088700026
18032	2191024	4.59E-04	2.01E-04	I	0.099983142
18050	2198237	5.86E-04	2.08E-04	I	0.058884275
18061	2198623	4.38E-04	1.53E-04	I	0.067520479
18075	2199392	4.18E-04	1.52E-04	I	0.066334048
18076	2199393	4.22E-04	1.54E-04	I	0.065683527
18086	2199931	5.50E-04	1.62E-04	I	0.061669085
18099	2201613	7.56E-04	2.71E-04	I	0.064249195
18103	2201850	8.12E-04	2.74E-04	I	0.06378843
18107	2203016	8.58E-04	2.77E-04	I	0.062288364
18112	2203226	9.52E-04	2.78E-04	I	0.063060366
18126	2203997	8.66E-04	2.28E-04	I	0.061392529
18137	2204409	6.71E-04	1.31E-04	I	0.057776099
18144	2204751	8.20E-04	1.66E-04	I	0.074171577
[truncated: 68,972 more rows]
