# Supplementary material for: Deep sampling of Hawaiian Caenorhabditis elegans reveals high genetic diversity and admixture with global populations
Source: eLife journal article supplement (doi:10.7554/elife.50465), 2019-12-03
Supplement: supp [file elife-50465-supp-v1.zip › elife_poa_e50465_Figure_4_source_data_2.csv]

CHROM	position	Population	statistic	value
X	21056	Hawaii	Tajima.D	-0.40216957705418704
X	39569	Hawaii	Tajima.D	-0.39894854433742133
X	40954	Hawaii	Tajima.D	-0.5216776560944503
X	40954	Hawaii	Tajima.D	-0.3101610345493793
X	40966	Hawaii	Tajima.D	-0.1547439755572026
X	41151	Hawaii	Tajima.D	0.4566374177478879
X	51977	Hawaii	Tajima.D	-0.9096464376190495
X	86980	Hawaii	Tajima.D	-0.9096464376190495
X	86980	Hawaii	Tajima.D	-1.0433394686325215
X	87033	Hawaii	Tajima.D	-1.2836425406867948
X	87033	Hawaii	Tajima.D	-1.0433394686325215
X	90354	Hawaii	Tajima.D	-0.9096464376190495
X	163347	Hawaii	Tajima.D	0.6388085984634795
X	192994	Hawaii	Tajima.D	-0.9096464376190495
X	192994	Hawaii	Tajima.D	-1.2174991779014674
X	193055	Hawaii	Tajima.D	-0.9096464376190495
X	206296	Hawaii	Tajima.D	-0.9096464376190495
X	206296	Hawaii	Tajima.D	-1.2174991779014674
X	215174	Hawaii	Tajima.D	-0.9494585661031987
X	216096	Hawaii	Tajima.D	-0.9333785297530817
X	216096	Hawaii	Tajima.D	-0.7493730884953503
X	216365	Hawaii	Tajima.D	-0.8100265226350617
X	244641	Hawaii	Tajima.D	-0.6494018937396329
X	248288	Hawaii	Tajima.D	-1.0552021618356984
X	248521	Hawaii	Tajima.D	-0.7789354382801753
X	248521	Hawaii	Tajima.D	-0.6466473601419499
X	248538	Hawaii	Tajima.D	-0.41996404803587206
X	248890	Hawaii	Tajima.D	-0.41996404803587206
X	255734	Hawaii	Tajima.D	0.6111777694224654
X	255734	Hawaii	Tajima.D	0.4566374177478879
X	295751	Hawaii	Tajima.D	-1.1483236783862996
X	297140	Hawaii	Tajima.D	-1.602458039428871
X	297686	Hawaii	Tajima.D	-1.6608103843802489
X	298452	Hawaii	Tajima.D	-1.8146766698656114
X	299200	Hawaii	Tajima.D	-1.7586793961886136
X	299336	Hawaii	Tajima.D	-1.5506122321674676
X	299607	Hawaii	Tajima.D	-1.5760342481725265
X	300370	Hawaii	Tajima.D	-1.5041303760869627
X	300437	Hawaii	Tajima.D	-1.562245321452796
X	302735	Hawaii	Tajima.D	-1.539373744089216
X	302999	Hawaii	Tajima.D	-1.4891205486918437
X	303677	Hawaii	Tajima.D	-1.4572073119952287
X	304295	Hawaii	Tajima.D	-1.3724534005160804
X	305386	Hawaii	Tajima.D	-1.2840721454803663
X	306595	Hawaii	Tajima.D	-1.3083998799101424
X	308265	Hawaii	Tajima.D	-1.448098033055173
X	308575	Hawaii	Tajima.D	-1.4936405540046265
X	309345	Hawaii	Tajima.D	-1.454654193938306
X	309740	Hawaii	Tajima.D	-1.4746383898852304
X	310959	Hawaii	Tajima.D	-1.5109387854778737
X	311377	Hawaii	Tajima.D	-1.5415062364966587
X	311459	Hawaii	Tajima.D	-1.4899774629354288
X	313179	Hawaii	Tajima.D	-1.5762936839307018
X	313786	Hawaii	Tajima.D	-1.6353328877858855
X	313906	Hawaii	Tajima.D	-1.601463323400234
X	314392	Hawaii	Tajima.D	-1.4754064056968752
X	314912	Hawaii	Tajima.D	-1.3510072437647815
X	316156	Hawaii	Tajima.D	-1.342074693016691
X	317421	Hawaii	Tajima.D	-0.9235444047506616
X	320047	Hawaii	Tajima.D	-0.8130982752959
X	323959	Hawaii	Tajima.D	-0.5893693570897394
X	324416	Hawaii	Tajima.D	-0.9189770889592648
X	327489	Hawaii	Tajima.D	-0.8460664910577579
X	328512	Hawaii	Tajima.D	-1.0285291243125354
X	328644	Hawaii	Tajima.D	-1.0881644732099351
X	328650	Hawaii	Tajima.D	-1.0881644732099351
X	328922	Hawaii	Tajima.D	-1.0804583032273471
X	329158	Hawaii	Tajima.D	-0.907715389708969
X	329572	Hawaii	Tajima.D	-0.970799896079341
X	330171	Hawaii	Tajima.D	-0.9092028121383064
X	332385	Hawaii	Tajima.D	-0.9268570694581749
X	332966	Hawaii	Tajima.D	-0.6456298495650759
X	333335	Hawaii	Tajima.D	-0.5511649582340512
X	334126	Hawaii	Tajima.D	-0.37614543809550177
X	335001	Hawaii	Tajima.D	-0.28405860492098833
X	335047	Hawaii	Tajima.D	-0.28405860492098833
X	335261	Hawaii	Tajima.D	-0.1094056630265298
X	335611	Hawaii	Tajima.D	-0.2136627308202172
X	336733	Hawaii	Tajima.D	-0.08749821605303229
X	337602	Hawaii	Tajima.D	0.44373182403870826
X	337670	Hawaii	Tajima.D	0.7416273854397205
X	338371	Hawaii	Tajima.D	0.6111777694224654
X	348097	Hawaii	Tajima.D	0.29333136821530287
X	348673	Hawaii	Tajima.D	-0.04660059933009181
X	350078	Hawaii	Tajima.D	-0.10363496149959076
X	350214	Hawaii	Tajima.D	-0.03275686297545545
X	350223	Hawaii	Tajima.D	-0.03275686297545545
X	350366	Hawaii	Tajima.D	0.20487658886767726
X	350398	Hawaii	Tajima.D	0.20603911582259868
X	351063	Hawaii	Tajima.D	0.03139315160841903
X	353159	Hawaii	Tajima.D	-0.003776122284245552
X	353577	Hawaii	Tajima.D	0.08422731613169762
X	355559	Hawaii	Tajima.D	-0.01755368079216541
X	356254	Hawaii	Tajima.D	-0.10166973559001426
X	358148	Hawaii	Tajima.D	-0.1942084878244403
X	358533	Hawaii	Tajima.D	-0.24300748485418136
X	358591	Hawaii	Tajima.D	-0.2635734742302714
X	358797	Hawaii	Tajima.D	-0.3872856081629739
X	359138	Hawaii	Tajima.D	-0.4751742264470897
X	359343	Hawaii	Tajima.D	-0.4386255297010434
X	359743	Hawaii	Tajima.D	-0.537014793964344
X	360453	Hawaii	Tajima.D	-0.47739509732447144
X	361821	Hawaii	Tajima.D	-0.35054932658593846
X	364585	Hawaii	Tajima.D	-0.25667242972840865
X	367802	Hawaii	Tajima.D	9.797181040427393e-4
X	368695	Hawaii	Tajima.D	-0.08178015652221059
X	368946	Hawaii	Tajima.D	-0.25786244754428683
X	370142	Hawaii	Tajima.D	-0.20504176612686154
X	370694	Hawaii	Tajima.D	-0.18917665704857142
X	372167	Hawaii	Tajima.D	-0.06438875034686922
X	372961	Hawaii	Tajima.D	-0.09900534479693313
X	374322	Hawaii	Tajima.D	-0.33033704100505457
X	374973	Hawaii	Tajima.D	-0.41765397193208526
X	375385	Hawaii	Tajima.D	-0.4301553299560891
X	375953	Hawaii	Tajima.D	-0.5412059887978591
X	376484	Hawaii	Tajima.D	-0.5215271466396715
X	377181	Hawaii	Tajima.D	-0.3923149045985599
X	377430	Hawaii	Tajima.D	-0.4421263321735409
X	378331	Hawaii	Tajima.D	-0.5487190899624843
X	378725	Hawaii	Tajima.D	-0.8520837001735035
X	381283	Hawaii	Tajima.D	-0.9596228489801606
X	382103	Hawaii	Tajima.D	-0.8722686555702034
X	384362	Hawaii	Tajima.D	-1.0979960047963229
X	386578	Hawaii	Tajima.D	-1.4205802940100096
X	386853	Hawaii	Tajima.D	-0.9858762752717799
X	387787	Hawaii	Tajima.D	-0.9428000363464658
X	388687	Hawaii	Tajima.D	-1.068446796925534
X	388845	Hawaii	Tajima.D	-1.068446796925534
X	389851	Hawaii	Tajima.D	-0.7583890127718081
X	390152	Hawaii	Tajima.D	-0.5436671060438828
X	391594	Hawaii	Tajima.D	-0.5502195261338486
X	392694	Hawaii	Tajima.D	-0.6351298164282773
X	394791	Hawaii	Tajima.D	-0.6968162808770461
X	395525	Hawaii	Tajima.D	-0.40011830514567137
X	396675	Hawaii	Tajima.D	-0.6888004869238709
X	397237	Hawaii	Tajima.D	-0.6256784616653835
X	398171	Hawaii	Tajima.D	-0.7822662351985568
X	398455	Hawaii	Tajima.D	-0.8138432308735198
X	400359	Hawaii	Tajima.D	-0.866466707999946
X	401765	Hawaii	Tajima.D	-0.9365667436534456
X	402380	Hawaii	Tajima.D	-0.9696813012925656
X	402773	Hawaii	Tajima.D	-0.9673082150241928
X	403125	Hawaii	Tajima.D	-0.8824462696036789
X	403403	Hawaii	Tajima.D	-0.9767636501909408
X	403741	Hawaii	Tajima.D	-0.9757553437576196
X	403816	Hawaii	Tajima.D	-1.09589835084655
X	406139	Hawaii	Tajima.D	-0.4855402051678458
X	406401	Hawaii	Tajima.D	-0.4869117856797951
X	412079	Hawaii	Tajima.D	-0.4942410972814896
X	413661	Hawaii	Tajima.D	-0.5906880180053296
X	414440	Hawaii	Tajima.D	-0.41078914838584485
X	414762	Hawaii	Tajima.D	-0.4666344112269025
X	415212	Hawaii	Tajima.D	-0.5191883335188946
X	415214	Hawaii	Tajima.D	-0.544026995705664
X	415610	Hawaii	Tajima.D	-0.6141057701913096
X	415777	Hawaii	Tajima.D	-0.5493215922329971
X	417616	Hawaii	Tajima.D	-0.9091917373723538
X	417945	Hawaii	Tajima.D	-0.8122550103089943
X	418384	Hawaii	Tajima.D	-0.9375510757657276
X	419029	Hawaii	Tajima.D	-1.0710646895245144
X	420743	Hawaii	Tajima.D	-1.0298918250746043
X	421175	Hawaii	Tajima.D	-0.9532552092316616
X	421726	Hawaii	Tajima.D	-1.0454842609323147
X	421953	Hawaii	Tajima.D	-1.0062465313276379
X	422221	Hawaii	Tajima.D	-0.860972076363785
X	422652	Hawaii	Tajima.D	-1.2994102712468263
X	423918	Hawaii	Tajima.D	-0.9780824197391814
X	425079	Hawaii	Tajima.D	-1.41896140298729
X	425079	Hawaii	Tajima.D	-1.2174991779014674
X	444726	Hawaii	Tajima.D	-1.3295984561122898
X	445092	Hawaii	Tajima.D	-1.3455563805209572
X	445390	Hawaii	Tajima.D	-1.0954673562178783
X	445593	Hawaii	Tajima.D	-0.7844594829241981
X	446946	Hawaii	Tajima.D	-0.8126039845699793
X	446946	Hawaii	Tajima.D	-0.804418492988036
X	449124	Hawaii	Tajima.D	-0.9410412320068008
X	449175	Hawaii	Tajima.D	-0.863674406300953
X	449985	Hawaii	Tajima.D	-0.7099345889008871
X	450220	Hawaii	Tajima.D	-0.6240404034683097
X	450720	Hawaii	Tajima.D	-0.48511910519199014
X	452021	Hawaii	Tajima.D	-0.4146143349814004
X	452021	Hawaii	Tajima.D	-0.47442118951061835
X	453060	Hawaii	Tajima.D	-0.7729921513370924
X	455900	Hawaii	Tajima.D	-0.7309175913983503
X	455900	Hawaii	Tajima.D	-0.7401890324294639
X	457068	Hawaii	Tajima.D	-0.3916130306401959
X	457286	Hawaii	Tajima.D	-0.5419445070886458
X	458317	Hawaii	Tajima.D	-0.553163951984819
X	464015	Hawaii	Tajima.D	-0.5366217725853467
X	465380	Hawaii	Tajima.D	-0.6002545040768233
X	465897	Hawaii	Tajima.D	-0.554427984689714
X	466744	Hawaii	Tajima.D	-0.5566089532130222
X	467396	Hawaii	Tajima.D	-0.2757153427273749
X	467589	Hawaii	Tajima.D	-0.40731154787270085
X	467762	Hawaii	Tajima.D	-0.40070523270368164
X	467762	Hawaii	Tajima.D	-0.4346602854136369
X	468456	Hawaii	Tajima.D	-0.4975785266872908
X	468878	Hawaii	Tajima.D	-0.5513828026271074
X	469588	Hawaii	Tajima.D	-0.583387810527379
X	470901	Hawaii	Tajima.D	-0.6660086557696862
X	473251	Hawaii	Tajima.D	-0.5859145785408397
X	474079	Hawaii	Tajima.D	-0.6068789601397141
X	475509	Hawaii	Tajima.D	-0.7993342572878952
X	476072	Hawaii	Tajima.D	-0.5436671060438828
X	476787	Hawaii	Tajima.D	-0.5514945556194892
X	477323	Hawaii	Tajima.D	-0.4196608012785981
X	478313	Hawaii	Tajima.D	-0.3037989397886797
X	479195	Hawaii	Tajima.D	-0.2511491000994911
X	480909	Hawaii	Tajima.D	-0.09380351631340456
X	482035	Hawaii	Tajima.D	-0.10609711940584965
X	483663	Hawaii	Tajima.D	-0.2062393592170601
X	484825	Hawaii	Tajima.D	-0.14435807416588733
X	486445	Hawaii	Tajima.D	-0.2672485178905924
X	487028	Hawaii	Tajima.D	-0.4610714561078669
X	487486	Hawaii	Tajima.D	-0.41244401427286415
X	488120	Hawaii	Tajima.D	-0.6766894461751295
X	489304	Hawaii	Tajima.D	-0.9103998651700319
X	489750	Hawaii	Tajima.D	-0.9211979528643288
X	490199	Hawaii	Tajima.D	-0.8804656842397375
X	490828	Hawaii	Tajima.D	-0.9135889482056434
X	492029	Hawaii	Tajima.D	-0.9452448625415641
X	492392	Hawaii	Tajima.D	-0.9023075400642895
X	493911	Hawaii	Tajima.D	-0.9427591096889302
X	495841	Hawaii	Tajima.D	-0.8897466750592126
X	497605	Hawaii	Tajima.D	-1.082877501242115
X	499046	Hawaii	Tajima.D	-0.748299231904128
X	500195	Hawaii	Tajima.D	-0.47390141487634924
X	500561	Hawaii	Tajima.D	-0.516231230931548
X	501488	Hawaii	Tajima.D	-0.5168176297057047
X	502029	Hawaii	Tajima.D	-0.4885400163782678
X	502080	Hawaii	Tajima.D	-0.5819711172467864
X	503062	Hawaii	Tajima.D	-0.6507463408541276
X	504455	Hawaii	Tajima.D	-0.6061363088042373
X	506120	Hawaii	Tajima.D	-0.7167955945139278
X	507970	Hawaii	Tajima.D	-0.6662675712687574
X	508506	Hawaii	Tajima.D	-0.7458790995418414
X	509475	Hawaii	Tajima.D	-0.9271203271816434
X	510257	Hawaii	Tajima.D	-0.8573074038775254
X	511338	Hawaii	Tajima.D	-0.9716407724560391
X	512023	Hawaii	Tajima.D	-1.0267344276049257
X	512246	Hawaii	Tajima.D	-1.0616037813125443
X	513865	Hawaii	Tajima.D	-0.83045962844021
X	514590	Hawaii	Tajima.D	-0.8866646960120448
X	515170	Hawaii	Tajima.D	-0.6008470780144844
X	517916	Hawaii	Tajima.D	-0.581520169186033
X	518115	Hawaii	Tajima.D	-0.6463468257871072
X	518424	Hawaii	Tajima.D	-0.5012660081895919
X	520563	Hawaii	Tajima.D	-0.6104208087346219
X	521095	Hawaii	Tajima.D	-0.6093519568840792
X	521416	Hawaii	Tajima.D	-0.3859247557709933
X	521700	Hawaii	Tajima.D	-0.3618095448581185
X	524756	Hawaii	Tajima.D	-0.454090300996772
X	525413	Hawaii	Tajima.D	-0.3947672541643459
X	526927	Hawaii	Tajima.D	-0.5629537431383828
X	528581	Hawaii	Tajima.D	-0.6018756639886546
X	528723	Hawaii	Tajima.D	-0.7206055914571708
X	528983	Hawaii	Tajima.D	-0.692233295110557
X	529714	Hawaii	Tajima.D	-0.5769009527258607
X	530373	Hawaii	Tajima.D	-0.5190849663477027
X	531545	Hawaii	Tajima.D	-0.8193313574354757
X	532205	Hawaii	Tajima.D	-0.8047275373881801
X	533829	Hawaii	Tajima.D	-0.8920827814231943
X	534770	Hawaii	Tajima.D	-0.8931930563471533
X	535883	Hawaii	Tajima.D	-0.855379007907555
X	536087	Hawaii	Tajima.D	-0.7966285030122487
X	536748	Hawaii	Tajima.D	-0.7577315988455698
X	538592	Hawaii	Tajima.D	-0.8844909336620194
X	539242	Hawaii	Tajima.D	-0.9481669714812924
X	540688	Hawaii	Tajima.D	-0.7463095847849107
X	542950	Hawaii	Tajima.D	-0.6848321500554199
X	543778	Hawaii	Tajima.D	-0.53207080862268
X	544451	Hawaii	Tajima.D	-0.7269388513165813
X	545617	Hawaii	Tajima.D	-0.7486401450298827
X	546387	Hawaii	Tajima.D	-0.7557303598597799
X	546797	Hawaii	Tajima.D	-0.5497136310830367
X	548353	Hawaii	Tajima.D	-0.5540421722715901
X	549494	Hawaii	Tajima.D	-0.23832663305071172
X	550241	Hawaii	Tajima.D	-0.24923360045087697
X	551619	Hawaii	Tajima.D	-0.41183892998905797
X	552249	Hawaii	Tajima.D	-0.19945338049897876
X	552717	Hawaii	Tajima.D	-0.24812332552691793
X	553942	Hawaii	Tajima.D	-0.1567323473858833
X	555078	Hawaii	Tajima.D	-0.06700259163641216
X	556220	Hawaii	Tajima.D	-0.1283360509961176
X	557540	Hawaii	Tajima.D	-0.40817787817621637
X	558384	Hawaii	Tajima.D	-0.4471478450565927
X	558821	Hawaii	Tajima.D	-0.7308593660240625
X	559793	Hawaii	Tajima.D	-0.8089898841664154
X	560293	Hawaii	Tajima.D	-0.8297188643136979
X	561483	Hawaii	Tajima.D	-1.0470723806366424
X	562490	Hawaii	Tajima.D	-1.163731573500981
X	562922	Hawaii	Tajima.D	-1.1187828024314552
X	563871	Hawaii	Tajima.D	-1.376246234004122
X	564175	Hawaii	Tajima.D	-1.3501479639819576
X	565246	Hawaii	Tajima.D	-1.2473278643556018
X	567309	Hawaii	Tajima.D	-0.862196546304902
X	570808	Hawaii	Tajima.D	-0.5547918020808901
X	571140	Hawaii	Tajima.D	-0.33586255430101
X	571228	Hawaii	Tajima.D	-0.29912637484454374
X	572738	Hawaii	Tajima.D	-0.11678154979422134
X	572814	Hawaii	Tajima.D	-0.0495268173993334
X	572973	Hawaii	Tajima.D	-0.1549445375669571
X	573506	Hawaii	Tajima.D	-0.11382895166927637
X	576832	Hawaii	Tajima.D	-0.05949694550997411
X	578425	Hawaii	Tajima.D	0.0397801865732204
X	579440	Hawaii	Tajima.D	-0.127198215263981
X	580492	Hawaii	Tajima.D	-0.23987423845700795
X	580796	Hawaii	Tajima.D	-0.3144470951185807
X	580813	Hawaii	Tajima.D	-0.3397827974090148
X	581093	Hawaii	Tajima.D	-0.3447413052370493
X	582555	Hawaii	Tajima.D	-0.08596586732023735
X	583763	Hawaii	Tajima.D	0.11628709131577573
X	586095	Hawaii	Tajima.D	0.15855603606225152
X	587253	Hawaii	Tajima.D	0.2923505868061775
X	587841	Hawaii	Tajima.D	0.18366696710789504
X	588612	Hawaii	Tajima.D	0.2919426920622626
X	589255	Hawaii	Tajima.D	0.24089857849750432
X	590807	Hawaii	Tajima.D	0.2902324779080365
X	591510	Hawaii	Tajima.D	0.23656800970463585
X	592123	Hawaii	Tajima.D	0.12283390248639849
X	592952	Hawaii	Tajima.D	-0.058220557581807254
X	593633	Hawaii	Tajima.D	-0.3091551792526172
X	594803	Hawaii	Tajima.D	-0.4742121780764831
X	594827	Hawaii	Tajima.D	-0.5526559941102971
X	595365	Hawaii	Tajima.D	-0.581085996449085
X	596094	Hawaii	Tajima.D	-0.6490488263132336
X	597055	Hawaii	Tajima.D	-0.5596065749962638
X	597593	Hawaii	Tajima.D	-0.5676613280011297
X	598444	Hawaii	Tajima.D	-0.6020622011886698
X	598874	Hawaii	Tajima.D	-0.4957954876330619
X	599199	Hawaii	Tajima.D	-0.5076388592870569
X	599419	Hawaii	Tajima.D	-0.2963597488101363
X	603713	Hawaii	Tajima.D	0.793501995625806
X	609014	Hawaii	Tajima.D	-0.14967970714604376
X	611261	Hawaii	Tajima.D	-0.7716170641894494
X	611382	Hawaii	Tajima.D	-0.6606860391408754
X	615593	Hawaii	Tajima.D	-0.5747493286633442
X	616924	Hawaii	Tajima.D	-0.9687779237367836
X	617428	Hawaii	Tajima.D	-1.0538391459395684
X	618183	Hawaii	Tajima.D	-1.055313021277008
X	618204	Hawaii	Tajima.D	-0.9743266804740218
X	618204	Hawaii	Tajima.D	-1.010351846080585
X	618456	Hawaii	Tajima.D	-1.0803557871438754
X	618839	Hawaii	Tajima.D	-0.8829826230999447
X	619201	Hawaii	Tajima.D	-0.877360659921949
X	693897	Hawaii	Tajima.D	1.7838845915329127
X	694571	Hawaii	Tajima.D	0.2335547329190647
X	695019	Hawaii	Tajima.D	-0.20801971419314744
X	695908	Hawaii	Tajima.D	-0.4232130529154626
X	696147	Hawaii	Tajima.D	-0.4688290226380847
X	697564	Hawaii	Tajima.D	-0.05300085092936112
X	698119	Hawaii	Tajima.D	0.08200474380048316
X	698533	Hawaii	Tajima.D	0.16872609474268457
X	698823	Hawaii	Tajima.D	0.19520984629240895
X	698941	Hawaii	Tajima.D	0.15052239296670508
X	698978	Hawaii	Tajima.D	0.10693736316303279
X	699048	Hawaii	Tajima.D	0.18168939174559504
X	699432	Hawaii	Tajima.D	0.277437157391065
X	699922	Hawaii	Tajima.D	0.310508736957667
X	700210	Hawaii	Tajima.D	0.24105043018464362
X	701547	Hawaii	Tajima.D	0.07035100978415076
X	705867	Hawaii	Tajima.D	0.0115640002301505
X	707543	Hawaii	Tajima.D	-0.3667708009141629
X	708457	Hawaii	Tajima.D	-0.7199879502038143
X	709364	Hawaii	Tajima.D	-0.8187194108135222
X	710095	Hawaii	Tajima.D	-0.9277744606538965
X	710846	Hawaii	Tajima.D	-1.0420129141265964
X	710931	Hawaii	Tajima.D	-1.1194239270210915
X	711220	Hawaii	Tajima.D	-1.1224424302487583
X	712657	Hawaii	Tajima.D	-1.1967019560552297
X	713717	Hawaii	Tajima.D	-1.3201718985377413
X	714509	Hawaii	Tajima.D	-1.454654193938306
X	715884	Hawaii	Tajima.D	-1.4394301898229842
X	717518	Hawaii	Tajima.D	-1.382899185726139
X	718295	Hawaii	Tajima.D	-1.3522043424466268
X	720419	Hawaii	Tajima.D	-1.4064815390700154
X	721523	Hawaii	Tajima.D	-1.4127100698300765
X	721953	Hawaii	Tajima.D	-1.318153308627285
X	722354	Hawaii	Tajima.D	-1.2852198424405574
X	723224	Hawaii	Tajima.D	-1.0758475348353258
X	724070	Hawaii	Tajima.D	-1.1102311928623918
X	725409	Hawaii	Tajima.D	-1.2426242136886596
X	725793	Hawaii	Tajima.D	-1.2771415638091324
X	726557	Hawaii	Tajima.D	-1.341295184694103
X	727553	Hawaii	Tajima.D	-1.285608232772265
X	727930	Hawaii	Tajima.D	-1.2798664756319824
X	728096	Hawaii	Tajima.D	-1.3013740488181769
X	729490	Hawaii	Tajima.D	-1.2621833338335577
X	730599	Hawaii	Tajima.D	-1.2238791774617594
X	732921	Hawaii	Tajima.D	-1.4987575323599802
X	733630	Hawaii	Tajima.D	-1.4899774629354288
X	735407	Hawaii	Tajima.D	-1.374148875071802
X	735901	Hawaii	Tajima.D	-1.3563195676099096
X	736080	Hawaii	Tajima.D	-1.2488141546264222
X	736293	Hawaii	Tajima.D	-1.3005251860076483
X	737005	Hawaii	Tajima.D	-1.158459961185056
X	737295	Hawaii	Tajima.D	-1.014760680496126
X	737827	Hawaii	Tajima.D	-1.1388534957842718
X	738302	Hawaii	Tajima.D	-1.444178278603069
X	738594	Hawaii	Tajima.D	-1.1819554201368838
X	739116	Hawaii	Tajima.D	-0.9096464376190495
X	777897	Hawaii	Tajima.D	1.4415244366323479
X	778387	Hawaii	Tajima.D	2.2578714263008486
X	778715	Hawaii	Tajima.D	2.2508127960824775
X	779255	Hawaii	Tajima.D	2.026346820215003
X	780287	Hawaii	Tajima.D	1.702052199047422
X	780738	Hawaii	Tajima.D	1.3920129362336162
X	780943	Hawaii	Tajima.D	1.1238428535180796
X	781006	Hawaii	Tajima.D	0.979387576036076
X	781220	Hawaii	Tajima.D	0.8017498137697157
X	781602	Hawaii	Tajima.D	0.7326423598113039
X	781950	Hawaii	Tajima.D	0.617201956069063
X	783110	Hawaii	Tajima.D	0.2386360294885606
X	783654	Hawaii	Tajima.D	0.1327412400498654
X	785655	Hawaii	Tajima.D	-0.16847478924834738
X	787484	Hawaii	Tajima.D	-0.30658457898255254
X	788516	Hawaii	Tajima.D	-0.21888656413037658
X	790114	Hawaii	Tajima.D	-0.18350371458529732
X	790791	Hawaii	Tajima.D	-0.24358580512561726
X	791288	Hawaii	Tajima.D	-0.1326682468855851
X	792602	Hawaii	Tajima.D	0.018861092405716182
X	793225	Hawaii	Tajima.D	4.7601883917919064e-4
X	793630	Hawaii	Tajima.D	0.10654201021081328
X	793993	Hawaii	Tajima.D	0.11933368756251075
X	794924	Hawaii	Tajima.D	0.15280291991245498
X	795941	Hawaii	Tajima.D	0.28617707123056535
X	796457	Hawaii	Tajima.D	0.23258362252978956
X	797246	Hawaii	Tajima.D	0.08995538881862747
X	798241	Hawaii	Tajima.D	0.12742312530589497
X	801109	Hawaii	Tajima.D	0.030789799516285774
X	803175	Hawaii	Tajima.D	-0.07271383619913542
X	803791	Hawaii	Tajima.D	-0.06535982141017724
X	804989	Hawaii	Tajima.D	-0.1672897561131277
X	805287	Hawaii	Tajima.D	-0.36132766439772185
X	805429	Hawaii	Tajima.D	-0.3521236589648219
X	805709	Hawaii	Tajima.D	-0.5069211714334121
X	808062	Hawaii	Tajima.D	-0.5859344528731238
X	808806	Hawaii	Tajima.D	-0.4093235449460603
X	808974	Hawaii	Tajima.D	-0.35736615669388716
X	810876	Hawaii	Tajima.D	-0.5214210475317772
X	811383	Hawaii	Tajima.D	-0.6319837027825069
X	812860	Hawaii	Tajima.D	-0.5949964647966227
X	815230	Hawaii	Tajima.D	-0.6664759415441431
X	816228	Hawaii	Tajima.D	-0.6786432839700324
X	816965	Hawaii	Tajima.D	-0.6736780763309302
X	817887	Hawaii	Tajima.D	-0.7577460846849234
X	818910	Hawaii	Tajima.D	-0.5738969382501643
X	819909	Hawaii	Tajima.D	-0.6187299053891419
X	820308	Hawaii	Tajima.D	-0.6668005547156985
X	821235	Hawaii	Tajima.D	-0.4368928117347282
X	821562	Hawaii	Tajima.D	-0.42470572389969796
X	823030	Hawaii	Tajima.D	-0.27601022708200157
X	823154	Hawaii	Tajima.D	-0.35430473567399173
X	824256	Hawaii	Tajima.D	-0.25562560867132594
X	825310	Hawaii	Tajima.D	-0.30135285932733935
X	827512	Hawaii	Tajima.D	-0.2451577172265201
X	829251	Hawaii	Tajima.D	-0.25049091182949257
X	830343	Hawaii	Tajima.D	-0.26502108206358954
X	830911	Hawaii	Tajima.D	-0.1714925937516786
X	831516	Hawaii	Tajima.D	-0.1399147607229587
X	831888	Hawaii	Tajima.D	-0.3270907065444621
X	832099	Hawaii	Tajima.D	-0.40320476348086726
X	832166	Hawaii	Tajima.D	-0.344833128611597
X	832287	Hawaii	Tajima.D	-0.3657743876408904
X	833399	Hawaii	Tajima.D	-0.31362533454197355
X	834031	Hawaii	Tajima.D	-0.25568210327161967
X	835136	Hawaii	Tajima.D	-0.36693001184046037
X	835786	Hawaii	Tajima.D	-0.22646435013990174
X	836368	Hawaii	Tajima.D	-0.32395747067021613
X	836589	Hawaii	Tajima.D	-1.115823275849497
X	837006	Hawaii	Tajima.D	0.9641142783127503
X	954755	Hawaii	Tajima.D	-0.9096464376190495
X	955367	Hawaii	Tajima.D	-0.020321372425450967
X	955380	Hawaii	Tajima.D	-0.2573186667632013
X	956671	Hawaii	Tajima.D	0.23283673257954854
X	957158	Hawaii	Tajima.D	-0.08692204823454372
X	957426	Hawaii	Tajima.D	-0.34452521884509846
X	957751	Hawaii	Tajima.D	-0.5304393599236557
X	958081	Hawaii	Tajima.D	-0.4500835643777524
X	959791	Hawaii	Tajima.D	-0.3751925579388473
X	960748	Hawaii	Tajima.D	-0.3730501481926661
X	965144	Hawaii	Tajima.D	-0.5824650638404614
X	965885	Hawaii	Tajima.D	-0.6731955703701783
X	966914	Hawaii	Tajima.D	-0.6370206224479311
X	968097	Hawaii	Tajima.D	-0.38050241794491924
X	968877	Hawaii	Tajima.D	-0.5905634158886411
X	969094	Hawaii	Tajima.D	-0.42310596225778163
X	969682	Hawaii	Tajima.D	-0.42519099807419714
X	970022	Hawaii	Tajima.D	-0.3928843718159417
X	970601	Hawaii	Tajima.D	-0.6078524008896653
X	971324	Hawaii	Tajima.D	-0.7254601905483393
X	971988	Hawaii	Tajima.D	-0.7509766012776429
X	973327	Hawaii	Tajima.D	-0.6503342741005788
X	973730	Hawaii	Tajima.D	-0.6093519568840792
X	975061	Hawaii	Tajima.D	-0.7862494666066893
X	975730	Hawaii	Tajima.D	-0.5583725737963164
X	976562	Hawaii	Tajima.D	-0.8799358820966537
X	976641	Hawaii	Tajima.D	-0.9530411245781019
X	976850	Hawaii	Tajima.D	-1.104013676183115
X	977685	Hawaii	Tajima.D	-0.7666575738194613
X	978763	Hawaii	Tajima.D	-0.41320434102844367
X	985137	Hawaii	Tajima.D	-0.30632387846167763
X	987230	Hawaii	Tajima.D	-0.21017360669619473
X	987668	Hawaii	Tajima.D	-0.12007017952306054
X	988534	Hawaii	Tajima.D	-0.309630965840925
X	988911	Hawaii	Tajima.D	-0.5255205718434711
X	989041	Hawaii	Tajima.D	-0.6050059269806344
X	989518	Hawaii	Tajima.D	-0.6636458412937828
X	989888	Hawaii	Tajima.D	-0.4920441122513114
X	989989	Hawaii	Tajima.D	-0.5635212094690187
X	990037	Hawaii	Tajima.D	-0.5593849859397372
X	990780	Hawaii	Tajima.D	-0.6610096488625907
X	990946	Hawaii	Tajima.D	-0.691788793037613
X	991907	Hawaii	Tajima.D	-0.9270828785284418
X	992963	Hawaii	Tajima.D	-0.875473329512655
X	993355	Hawaii	Tajima.D	-0.38128347851822497
X	993892	Hawaii	Tajima.D	0.04396395526629864
X	994068	Hawaii	Tajima.D	1.4993922866940899
X	1058815	Hawaii	Tajima.D	-0.7085373759096902
X	1059257	Hawaii	Tajima.D	-0.7657698194657965
X	1059783	Hawaii	Tajima.D	-0.949389109606186
X	1060644	Hawaii	Tajima.D	-1.0139757877355002
X	1060956	Hawaii	Tajima.D	-0.8360727617561242
X	1061223	Hawaii	Tajima.D	-0.9484399612422334
X	1061362	Hawaii	Tajima.D	-0.8307095300250741
X	1061443	Hawaii	Tajima.D	-0.7879274554440533
X	1061530	Hawaii	Tajima.D	-0.7481655580031853
X	1062167	Hawaii	Tajima.D	-0.6271933304217141
X	1063255	Hawaii	Tajima.D	-0.7432706087611552
X	1065354	Hawaii	Tajima.D	-0.5237664598101731
X	1066908	Hawaii	Tajima.D	-0.34682563968069663
X	1067480	Hawaii	Tajima.D	-0.21010347843122684
X	1068227	Hawaii	Tajima.D	-0.20900712189299034
X	1068526	Hawaii	Tajima.D	-0.19033564060327612
X	1068756	Hawaii	Tajima.D	-0.1574636087596253
X	1068809	Hawaii	Tajima.D	-0.055358179879344195
X	1069214	Hawaii	Tajima.D	-0.15630073308688155
X	1069351	Hawaii	Tajima.D	-0.21842847921303118
X	1074295	Hawaii	Tajima.D	0.243524547222857
X	1075742	Hawaii	Tajima.D	-0.11312378090216821
X	1076054	Hawaii	Tajima.D	-0.1500173038778454
X	1076215	Hawaii	Tajima.D	-0.40396788735924566
X	1080433	Hawaii	Tajima.D	-0.5305324093026843
X	1080887	Hawaii	Tajima.D	-0.6698356853019098
X	1081695	Hawaii	Tajima.D	-0.7201734502170108
X	1083211	Hawaii	Tajima.D	-0.6117096332675435
X	1083505	Hawaii	Tajima.D	-0.6069292631575428
X	1083803	Hawaii	Tajima.D	-0.8450877373187067
X	1085291	Hawaii	Tajima.D	-0.9522454361716751
X	1085703	Hawaii	Tajima.D	-0.6662345848588455
X	1091090	Hawaii	Tajima.D	-0.13287560982058316
X	1092015	Hawaii	Tajima.D	-0.2646523828857865
X	1092376	Hawaii	Tajima.D	-0.33495691757980045
X	1092715	Hawaii	Tajima.D	-0.412405979271256
X	1093310	Hawaii	Tajima.D	-0.5259371940591817
X	1093645	Hawaii	Tajima.D	-0.6077582606168653
X	1093850	Hawaii	Tajima.D	-0.37605295955614254
X	1094679	Hawaii	Tajima.D	-0.503634062958664
X	1097861	Hawaii	Tajima.D	-0.31797823087361576
X	1099642	Hawaii	Tajima.D	-0.5491185740261735
X	1100136	Hawaii	Tajima.D	-0.6915805872032295
X	1100997	Hawaii	Tajima.D	-0.6085505795233501
X	1101196	Hawaii	Tajima.D	-0.4623362828583328
X	1101488	Hawaii	Tajima.D	-0.4913265330174979
X	1102171	Hawaii	Tajima.D	-0.4999617319310784
X	1103612	Hawaii	Tajima.D	-0.5645317060359907
X	1104442	Hawaii	Tajima.D	-0.8580130606726439
X	1105742	Hawaii	Tajima.D	-0.7954658082813516
X	1107976	Hawaii	Tajima.D	-0.5485056768117638
X	1108400	Hawaii	Tajima.D	-0.5908899005235472
X	1108938	Hawaii	Tajima.D	-0.47358890936025894
X	1109663	Hawaii	Tajima.D	-0.5417545697857988
X	1111067	Hawaii	Tajima.D	-0.5156667719518586
X	1111666	Hawaii	Tajima.D	-0.7219932398686191
X	1112858	Hawaii	Tajima.D	-0.6676351975321111
X	1114321	Hawaii	Tajima.D	-0.6982338620604611
X	1115094	Hawaii	Tajima.D	-0.6012989133663424
X	1116610	Hawaii	Tajima.D	-0.5089088571288768
X	1117312	Hawaii	Tajima.D	-0.8331905343771048
X	1118689	Hawaii	Tajima.D	-0.6848419159255122
X	1120100	Hawaii	Tajima.D	-0.8284085871278226
X	1120730	Hawaii	Tajima.D	-0.8203661975534936
X	1121262	Hawaii	Tajima.D	-0.8319131505664189
X	1122444	Hawaii	Tajima.D	-0.7769259229442911
X	1123061	Hawaii	Tajima.D	-0.8152043396088683
X	1124532	Hawaii	Tajima.D	-0.6571390480882348
X	1125262	Hawaii	Tajima.D	-0.5283277909576247
X	1126396	Hawaii	Tajima.D	-0.6525334605184279
X	1126976	Hawaii	Tajima.D	-0.5846194044108995
X	1128334	Hawaii	Tajima.D	-0.6956690145770179
X	1129210	Hawaii	Tajima.D	-0.49753124231718354
X	1129770	Hawaii	Tajima.D	-0.4732919326903304
X	1130398	Hawaii	Tajima.D	-0.5222103764862731
X	1131331	Hawaii	Tajima.D	-0.39504690904810846
X	1131548	Hawaii	Tajima.D	-0.32339272667957614
X	1132192	Hawaii	Tajima.D	-0.37818317083671105
X	1132360	Hawaii	Tajima.D	-0.5252634774552063
X	1133141	Hawaii	Tajima.D	-0.31165054412248994
X	1133872	Hawaii	Tajima.D	-0.14502266400793679
X	1140865	Hawaii	Tajima.D	0.2363036818659818
X	1141696	Hawaii	Tajima.D	-0.30750661802894214
X	1142327	Hawaii	Tajima.D	-0.3150299241832657
X	1142770	Hawaii	Tajima.D	-0.44518999971670503
X	1143448	Hawaii	Tajima.D	-0.552000782375691
X	1143877	Hawaii	Tajima.D	-0.6391738731025962
X	1144148	Hawaii	Tajima.D	-0.8449048967848228
X	1145084	Hawaii	Tajima.D	-0.7830876432435057
X	1146651	Hawaii	Tajima.D	-0.7703272905066437
X	1147003	Hawaii	Tajima.D	-0.9673182356308785
X	1147544	Hawaii	Tajima.D	-0.9203027827085941
X	1149236	Hawaii	Tajima.D	-0.9696566542809781
X	1149321	Hawaii	Tajima.D	-0.9048366069283934
X	1150588	Hawaii	Tajima.D	-0.898235256543277
X	1150742	Hawaii	Tajima.D	-0.7890841851160443
X	1150899	Hawaii	Tajima.D	-0.2227318312425334
X	1151214	Hawaii	Tajima.D	-0.518573756815918
X	1175865	Hawaii	Tajima.D	-1.5839201404981964
X	1176585	Hawaii	Tajima.D	-0.8269647708339294
X	1176781	Hawaii	Tajima.D	-1.1459638707041677
X	1177000	Hawaii	Tajima.D	-1.0794732453476088
X	1177806	Hawaii	Tajima.D	-0.9870312042456455
X	1178630	Hawaii	Tajima.D	-0.7793903301362367
X	1178711	Hawaii	Tajima.D	-0.7038165883350013
X	1178876	Hawaii	Tajima.D	-0.5071247448919771
X	1179508	Hawaii	Tajima.D	-0.4535926449586211
X	1179812	Hawaii	Tajima.D	-0.5455919874183137
X	1180636	Hawaii	Tajima.D	-0.2979970030470506
X	1182338	Hawaii	Tajima.D	-0.35377524119878756
X	1182813	Hawaii	Tajima.D	-0.058108820249677104
X	1184057	Hawaii	Tajima.D	0.15046537217439815
X	1184650	Hawaii	Tajima.D	0.1289108936499663
X	1184961	Hawaii	Tajima.D	0.10341089561441202
X	1186369	Hawaii	Tajima.D	0.3526437766738144
X	1187798	Hawaii	Tajima.D	0.33002940313619245
X	1188328	Hawaii	Tajima.D	0.36534187404964175
X	1188490	Hawaii	Tajima.D	0.6977817302179914
X	1188699	Hawaii	Tajima.D	0.6875915403636079
X	1189177	Hawaii	Tajima.D	0.8397392820455553
X	1191495	Hawaii	Tajima.D	0.6920684166851625
X	1191879	Hawaii	Tajima.D	0.6750910514128344
X	1192016	Hawaii	Tajima.D	1.094039522009818
X	1192445	Hawaii	Tajima.D	0.4667386860143416
X	1202382	Hawaii	Tajima.D	-0.8479423854610963
X	1202423	Hawaii	Tajima.D	-0.5602711297000005
X	1203706	Hawaii	Tajima.D	-0.1745777481495696
X	1203706	Hawaii	Tajima.D	-0.2588254599328283
X	1204020	Hawaii	Tajima.D	-0.44249745872988244
X	1204569	Hawaii	Tajima.D	-0.0898678851590889
X	1204750	Hawaii	Tajima.D	0.031143185522860595
X	1206230	Hawaii	Tajima.D	-0.04627257870768673
X	1206538	Hawaii	Tajima.D	-0.03733457369294642
X	1207444	Hawaii	Tajima.D	-0.1543050944523742
X	1208737	Hawaii	Tajima.D	0.1288150111571957
X	1209237	Hawaii	Tajima.D	0.16390641894272628
X	1210634	Hawaii	Tajima.D	-0.01150499393389745
X	1210918	Hawaii	Tajima.D	-0.0710112038601639
X	1211721	Hawaii	Tajima.D	0.32612165061937654
X	1212534	Hawaii	Tajima.D	0.13490124648365207
X	1213414	Hawaii	Tajima.D	-0.09189664417557873
X	1215110	Hawaii	Tajima.D	0.07872939452072777
X	1215654	Hawaii	Tajima.D	0.25656542106469743
X	1217056	Hawaii	Tajima.D	0.3562315323883485
X	1218581	Hawaii	Tajima.D	0.3089346069537344
X	1219148	Hawaii	Tajima.D	0.15536440516681077
X	1219369	Hawaii	Tajima.D	0.2386475231376341
X	1220377	Hawaii	Tajima.D	0.29897476558478797
X	1221231	Hawaii	Tajima.D	-0.14330382926234392
X	1221691	Hawaii	Tajima.D	-0.10637704507749374
X	1223278	Hawaii	Tajima.D	-0.13106034370232417
X	1224221	Hawaii	Tajima.D	-0.20002002931933574
X	1224390	Hawaii	Tajima.D	-0.5315646968984533
X	1225356	Hawaii	Tajima.D	-0.5646983119942486
X	1226242	Hawaii	Tajima.D	-0.530267536981634
X	1228715	Hawaii	Tajima.D	-0.5030000143924436
X	1228782	Hawaii	Tajima.D	-0.661671646496334
X	1228999	Hawaii	Tajima.D	-0.55617047627047
X	1230105	Hawaii	Tajima.D	-0.4181217888024753
X	1235944	Hawaii	Tajima.D	-0.4580297357465235
X	1236858	Hawaii	Tajima.D	-0.1133322069460055
X	1237515	Hawaii	Tajima.D	-0.2143314226744582
X	1237730	Hawaii	Tajima.D	-0.052610985785908254
X	1238296	Hawaii	Tajima.D	-0.07849064631374608
X	1238725	Hawaii	Tajima.D	-0.003486639370961195
X	1239496	Hawaii	Tajima.D	-0.06515735845389921
X	1240138	Hawaii	Tajima.D	0.1589832279814901
X	1241306	Hawaii	Tajima.D	0.24629683096582355
X	1242058	Hawaii	Tajima.D	0.3267150352257848
X	1242453	Hawaii	Tajima.D	0.4109422302683566
X	1243174	Hawaii	Tajima.D	0.410995693871725
X	1243388	Hawaii	Tajima.D	0.6591801193695035
X	1243528	Hawaii	Tajima.D	0.6476144647876638
X	1244013	Hawaii	Tajima.D	0.7135421696294122
X	1244500	Hawaii	Tajima.D	0.4970529578249094
X	1250000	Hawaii	Tajima.D	0.6524282491777438
X	1252988	Hawaii	Tajima.D	0.31409601795286257
X	1253580	Hawaii	Tajima.D	-0.09634871204235203
X	1253727	Hawaii	Tajima.D	-0.21407475117996755
X	1254633	Hawaii	Tajima.D	-0.20562260102611266
X	1255538	Hawaii	Tajima.D	-0.5650224042860347
X	1257590	Hawaii	Tajima.D	-0.47341962642157304
X	1257701	Hawaii	Tajima.D	-0.3002273638384833
X	1258471	Hawaii	Tajima.D	-0.4314734633874853
X	1259140	Hawaii	Tajima.D	-0.42420130163312536
X	1259585	Hawaii	Tajima.D	-0.53983304135868
X	1260977	Hawaii	Tajima.D	-0.4816830602997683
X	1260984	Hawaii	Tajima.D	-0.3187748394212191
X	1262482	Hawaii	Tajima.D	-0.19355815116057742
X	1263188	Hawaii	Tajima.D	-0.22749404316176308
X	1264216	Hawaii	Tajima.D	-0.15330928825629445
X	1265999	Hawaii	Tajima.D	-0.3694785817901473
X	1267244	Hawaii	Tajima.D	-0.5161735079559656
X	1269034	Hawaii	Tajima.D	-0.1537023067348712
X	1270393	Hawaii	Tajima.D	-0.2412273237593113
X	1270830	Hawaii	Tajima.D	-0.30530248411081146
X	1272237	Hawaii	Tajima.D	-0.24923360045087697
X	1272336	Hawaii	Tajima.D	-0.3929179439376503
X	1273232	Hawaii	Tajima.D	0.002408549877378632
X	1274123	Hawaii	Tajima.D	0.05850708899223989
X	1274567	Hawaii	Tajima.D	0.11232201970662596
X	1274797	Hawaii	Tajima.D	0.27474784266849733
X	1275322	Hawaii	Tajima.D	0.32993821408944635
X	1277095	Hawaii	Tajima.D	0.3317961448052726
X	1277176	Hawaii	Tajima.D	0.5269698287206426
X	1277258	Hawaii	Tajima.D	0.8519793802305768
X	1277715	Hawaii	Tajima.D	1.0213391661904314
X	1277827	Hawaii	Tajima.D	0.5414943305747499
X	1286864	Hawaii	Tajima.D	-0.6506028915468023
X	1287260	Hawaii	Tajima.D	-0.6008017003269457
X	1288028	Hawaii	Tajima.D	-0.3581834639805716
X	1288056	Hawaii	Tajima.D	-0.38493539671385413
X	1288573	Hawaii	Tajima.D	-0.06486663449105526
X	1289169	Hawaii	Tajima.D	0.455440552400785
X	1289593	Hawaii	Tajima.D	0.32754108223755957
X	1290220	Hawaii	Tajima.D	-0.40216957705418704
X	1318821	Hawaii	Tajima.D	-0.7037280355580768
X	1318853	Hawaii	Tajima.D	-0.023959460680994197
X	1320114	Hawaii	Tajima.D	-0.4255506748387384
X	1320640	Hawaii	Tajima.D	-0.934807931607333
X	1321168	Hawaii	Tajima.D	-0.80777512255849
X	1321430	Hawaii	Tajima.D	-0.6781843458165994
X	1321793	Hawaii	Tajima.D	-0.5116255972175912
X	1321842	Hawaii	Tajima.D	-0.5607651041160266
X	1322529	Hawaii	Tajima.D	-0.6329210395526039
X	1322930	Hawaii	Tajima.D	-0.5246395352408566
X	1323225	Hawaii	Tajima.D	-0.500080025978024
X	1323562	Hawaii	Tajima.D	-0.4577138482200095
X	1324602	Hawaii	Tajima.D	-0.3475109405493021
X	1326029	Hawaii	Tajima.D	-0.1460180093795043
X	1326980	Hawaii	Tajima.D	0.04862704181073328
X	1327364	Hawaii	Tajima.D	-0.06158317800728364
X	1330015	Hawaii	Tajima.D	0.06185833413778746
X	1330779	Hawaii	Tajima.D	0.2664237357635162
X	1332749	Hawaii	Tajima.D	0.5636644648147792
X	1334503	Hawaii	Tajima.D	0.2355585565312003
X	1336050	Hawaii	Tajima.D	0.15179343866491166
X	1336592	Hawaii	Tajima.D	0.12547079500804467
X	1337333	Hawaii	Tajima.D	0.06899794678185009
X	1337375	Hawaii	Tajima.D	0.19269154359284743
X	1337464	Hawaii	Tajima.D	0.04224118261220763
X	1337600	Hawaii	Tajima.D	0.13535192432196325
X	1337789	Hawaii	Tajima.D	-0.045611360367572656
X	1338051	Hawaii	Tajima.D	-0.14951554659337665
X	1338272	Hawaii	Tajima.D	-0.2964426242849836
X	1338630	Hawaii	Tajima.D	-0.099394573891960325
X	1339330	Hawaii	Tajima.D	0.02985678418555275
X	1340052	Hawaii	Tajima.D	-1.0433394686325215
X	1355790	Hawaii	Tajima.D	-0.29476752048611055
X	1355826	Hawaii	Tajima.D	-0.8127209808914039
X	1356965	Hawaii	Tajima.D	-1.1301998289554505
X	1356975	Hawaii	Tajima.D	-0.8030715300103624
X	1357575	Hawaii	Tajima.D	-1.2061974310933283
X	1360318	Hawaii	Tajima.D	-1.2189898743436471
X	1361015	Hawaii	Tajima.D	-1.3141314315812491
X	1361796	Hawaii	Tajima.D	-1.3463049867047787
X	1362204	Hawaii	Tajima.D	-1.2655044246548508
X	1362893	Hawaii	Tajima.D	-1.0908675838190336
X	1364400	Hawaii	Tajima.D	-0.9345048158861788
X	1364694	Hawaii	Tajima.D	-0.9645176012098593
X	1365270	Hawaii	Tajima.D	-1.0030550755745733
X	1366474	Hawaii	Tajima.D	-0.9617228135179441
X	1366909	Hawaii	Tajima.D	-1.0042628278808021
X	1367706	Hawaii	Tajima.D	-0.8458667526694169
X	1368461	Hawaii	Tajima.D	-0.7211004431334933
X	1368834	Hawaii	Tajima.D	-0.7737109871560593
X	1369764	Hawaii	Tajima.D	-0.8723286341325592
X	1369988	Hawaii	Tajima.D	-1.0643263379874914
X	1370512	Hawaii	Tajima.D	-1.1601414344837504
X	1370586	Hawaii	Tajima.D	-1.0748968260196075
X	1371810	Hawaii	Tajima.D	-0.8181768066688573
X	1372090	Hawaii	Tajima.D	0.40107729495437006
X	1393505	Hawaii	Tajima.D	-1.3257816778298366
X	1393662	Hawaii	Tajima.D	-0.720994655070505
X	1394450	Hawaii	Tajima.D	-1.0832507402693075
X	1395298	Hawaii	Tajima.D	-1.3170446234126127
X	1395686	Hawaii	Tajima.D	-1.4061948579485222
X	1396156	Hawaii	Tajima.D	-1.4088330399371565
X	1396753	Hawaii	Tajima.D	-1.3498329787807606
X	1397017	Hawaii	Tajima.D	-1.334799468282697
X	1397303	Hawaii	Tajima.D	-1.1228436261641532
X	1398082	Hawaii	Tajima.D	-1.3477468618219102
X	1398347	Hawaii	Tajima.D	-1.3444412430780546
X	1401052	Hawaii	Tajima.D	-1.0133073906357464
X	1405728	Hawaii	Tajima.D	-0.9251528816535981
X	1407688	Hawaii	Tajima.D	-1.0120620084195087
X	1407829	Hawaii	Tajima.D	-1.1740143611458387
X	1407949	Hawaii	Tajima.D	-1.2406809935231395
X	1408104	Hawaii	Tajima.D	-1.2819216619824327
X	1408112	Hawaii	Tajima.D	-1.3689733212171413
X	1408165	Hawaii	Tajima.D	-1.3457491845406118
X	1408204	Hawaii	Tajima.D	-1.2931797145450334
X	1408284	Hawaii	Tajima.D	-1.4219137401540936
X	1409914	Hawaii	Tajima.D	-1.6560008052466317
X	1411000	Hawaii	Tajima.D	-1.8082515655971716
X	1417054	Hawaii	Tajima.D	-1.621420442838282
X	1417482	Hawaii	Tajima.D	-1.716546012147112
X	1417560	Hawaii	Tajima.D	-1.605467358108787
X	1448489	Hawaii	Tajima.D	-1.5484627963869002
X	1448647	Hawaii	Tajima.D	-0.9226309609085109
X	1450127	Hawaii	Tajima.D	-0.44444337024070973
X	1450429	Hawaii	Tajima.D	-0.4198951500247417
X	1450532	Hawaii	Tajima.D	-0.7158473344429016
X	1450710	Hawaii	Tajima.D	-0.6869888467847555
X	1451745	Hawaii	Tajima.D	-0.42971405300171056
X	1451819	Hawaii	Tajima.D	-0.3882432091738935
X	1452367	Hawaii	Tajima.D	-0.4905526295796272
X	1453510	Hawaii	Tajima.D	-0.4981005841442129
X	1454326	Hawaii	Tajima.D	-0.4355356779628114
X	1456565	Hawaii	Tajima.D	-0.5315616256530323
X	1457658	Hawaii	Tajima.D	-0.7030458434928198
X	1458295	Hawaii	Tajima.D	-0.7587011590348608
X	1458866	Hawaii	Tajima.D	-0.8062147143980718
X	1459450	Hawaii	Tajima.D	-0.5302639415174346
X	1460283	Hawaii	Tajima.D	-0.4584719010281802
X	1460621	Hawaii	Tajima.D	-0.32267384013125927
X	1460993	Hawaii	Tajima.D	-0.18004225693541084
X	1462456	Hawaii	Tajima.D	0.07001516637908684
X	1463510	Hawaii	Tajima.D	0.14707323442763498
X	1464548	Hawaii	Tajima.D	0.28364188345098285
X	1465653	Hawaii	Tajima.D	0.5560003244877824
X	1465752	Hawaii	Tajima.D	0.7439725689765723
X	1466879	Hawaii	Tajima.D	1.1620335557650616
X	1467502	Hawaii	Tajima.D	1.004053705547492
X	1468260	Hawaii	Tajima.D	0.8364390664292137
X	1468688	Hawaii	Tajima.D	0.6430292063132762
X	1469634	Hawaii	Tajima.D	0.4999351876134841
X	1474296	Hawaii	Tajima.D	0.11724393439479022
X	1476497	Hawaii	Tajima.D	0.09190685011764045
X	1477413	Hawaii	Tajima.D	0.32118426786948395
X	1477640	Hawaii	Tajima.D	0.2534907316812257
X	1478189	Hawaii	Tajima.D	0.34880941754156014
X	1478684	Hawaii	Tajima.D	0.26083802392658817
X	1479010	Hawaii	Tajima.D	0.08248411910475642
X	1479365	Hawaii	Tajima.D	0.13383805511009836
X	1481561	Hawaii	Tajima.D	0.33484944453721144
X	1482454	Hawaii	Tajima.D	0.2534586210950759
X	1483715	Hawaii	Tajima.D	0.4632913670234188
X	1484247	Hawaii	Tajima.D	0.5371905401678332
X	1485058	Hawaii	Tajima.D	0.4737029720404678
X	1485531	Hawaii	Tajima.D	0.6271274907920675
X	1485770	Hawaii	Tajima.D	0.7091227407808913
X	1486365	Hawaii	Tajima.D	0.8307473470620982
X	1487283	Hawaii	Tajima.D	1.0050172100718409
X	1491553	Hawaii	Tajima.D	0.9811255720395148
X	1492442	Hawaii	Tajima.D	0.9866676676376701
X	1493353	Hawaii	Tajima.D	1.031642626219661
X	1494267	Hawaii	Tajima.D	1.0003785746204192
X	1494760	Hawaii	Tajima.D	1.0067139714478648
X	1495311	Hawaii	Tajima.D	1.1238471581277651
X	1495948	Hawaii	Tajima.D	1.0481454797949565
X	1497036	Hawaii	Tajima.D	0.9037410442334091
X	1498097	Hawaii	Tajima.D	0.9832575036579458
X	1498696	Hawaii	Tajima.D	0.9295251836114201
X	1499135	Hawaii	Tajima.D	0.951432396407629
X	1499944	Hawaii	Tajima.D	0.6607142255528217
X	1500628	Hawaii	Tajima.D	0.7184385518971903
X	1501184	Hawaii	Tajima.D	0.5852516935001004
X	1501889	Hawaii	Tajima.D	0.48441314382953055
X	1502740	Hawaii	Tajima.D	0.06244245939126099
X	1503165	Hawaii	Tajima.D	0.15946628615902061
X	1505313	Hawaii	Tajima.D	0.3390486233760373
X	1510298	Hawaii	Tajima.D	0.18050685411120182
X	1510889	Hawaii	Tajima.D	0.3346730645945244
X	1512031	Hawaii	Tajima.D	0.3464048623239909
X	1513306	Hawaii	Tajima.D	0.790994698788022
X	1513398	Hawaii	Tajima.D	0.8695102980107963
X	1514444	Hawaii	Tajima.D	0.938740284930998
X	1515022	Hawaii	Tajima.D	0.7281942357107425
X	1515782	Hawaii	Tajima.D	0.43440753673426785
X	1517280	Hawaii	Tajima.D	0.12636514756743433
X	1517671	Hawaii	Tajima.D	-0.11109252339696495
X	1517847	Hawaii	Tajima.D	-0.22978514551582926
X	1519005	Hawaii	Tajima.D	-0.5098101262308073
X	1519698	Hawaii	Tajima.D	-0.5986892310090158
X	1520623	Hawaii	Tajima.D	-0.7596235559621939
X	1520993	Hawaii	Tajima.D	-0.8784034212323031
X	1521930	Hawaii	Tajima.D	-1.2447405183941367
X	1522967	Hawaii	Tajima.D	-1.3152320589909052
X	1523320	Hawaii	Tajima.D	-1.2673075684760509
X	1524122	Hawaii	Tajima.D	-1.127284282087504
X	1525446	Hawaii	Tajima.D	-1.2093334972552847
X	1525666	Hawaii	Tajima.D	-1.2437442741389528
X	1529821	Hawaii	Tajima.D	-1.2338322387939942
X	1531000	Hawaii	Tajima.D	-1.1892654106087055
X	1531701	Hawaii	Tajima.D	-1.109782880142627
X	1533860	Hawaii	Tajima.D	-0.9454982558910686
X	1534513	Hawaii	Tajima.D	-0.6984242448787015
X	1536041	Hawaii	Tajima.D	-0.6377025318608704
X	1536732	Hawaii	Tajima.D	-0.44711820238385486
X	1537320	Hawaii	Tajima.D	-0.3977645056063044
X	1538084	Hawaii	Tajima.D	-0.12726277923036308
X	1538141	Hawaii	Tajima.D	-0.11566515594601863
X	1538618	Hawaii	Tajima.D	0.04326961279451807
X	1539305	Hawaii	Tajima.D	0.014660946847039079
X	1541055	Hawaii	Tajima.D	0.06623871307753215
X	1541964	Hawaii	Tajima.D	0.11516886760289778
X	1543446	Hawaii	Tajima.D	0.07793468219127017
X	1544530	Hawaii	Tajima.D	0.11222588695692315
X	1545177	Hawaii	Tajima.D	0.08060152136896842
X	1545350	Hawaii	Tajima.D	-0.0054597305561629025
X	1546810	Hawaii	Tajima.D	0.033154758859110824
X	1547380	Hawaii	Tajima.D	0.035724062834859766
X	1548069	Hawaii	Tajima.D	-0.1221931289499518
X	1549518	Hawaii	Tajima.D	-0.11105457244832745
X	1551615	Hawaii	Tajima.D	-0.5088028047604446
X	1551939	Hawaii	Tajima.D	-0.4260012357247469
X	1553190	Hawaii	Tajima.D	-0.5362405213638274
X	1555223	Hawaii	Tajima.D	-0.35731086119087674
X	1555610	Hawaii	Tajima.D	-0.3839276600751799
X	1556026	Hawaii	Tajima.D	-0.29863905731621937
X	1557809	Hawaii	Tajima.D	-0.7130494260341123
X	1558109	Hawaii	Tajima.D	-0.8069674679455838
X	1558220	Hawaii	Tajima.D	-0.7438176399640967
X	1558297	Hawaii	Tajima.D	-0.7125534586639399
X	1559030	Hawaii	Tajima.D	-0.5342262963903869
X	1560041	Hawaii	Tajima.D	-0.7888957863654706
X	1561616	Hawaii	Tajima.D	-0.6534915590612577
X	1566339	Hawaii	Tajima.D	-0.9358059668564495
X	1566928	Hawaii	Tajima.D	-1.0411531007294235
X	1567520	Hawaii	Tajima.D	-0.99722073689915
X	1567989	Hawaii	Tajima.D	-0.726742278830182
X	1568351	Hawaii	Tajima.D	-0.7106445514796237
X	1568719	Hawaii	Tajima.D	-0.752869559474002
X	1569001	Hawaii	Tajima.D	-0.8670405280934066
X	1569361	Hawaii	Tajima.D	-0.9062503744569447
X	1570633	Hawaii	Tajima.D	-0.88081445629995
X	1571323	Hawaii	Tajima.D	-1.0660540141161021
X	1572638	Hawaii	Tajima.D	-0.9967706929611349
X	1572974	Hawaii	Tajima.D	-0.9655881456181749
X	1573315	Hawaii	Tajima.D	-1.1980919571352275
X	1573968	Hawaii	Tajima.D	-1.3579656525738013
X	1574705	Hawaii	Tajima.D	-1.5244523423675311
X	1575021	Hawaii	Tajima.D	-1.698844595502894
X	1575624	Hawaii	Tajima.D	-1.318401632712433
X	1585397	Hawaii	Tajima.D	-1.2945223741487353
X	1585433	Hawaii	Tajima.D	-1.2214317974928381
X	1585481	Hawaii	Tajima.D	-1.3847037446610517
X	1585573	Hawaii	Tajima.D	-1.2591111967644262
X	1585795	Hawaii	Tajima.D	-1.5213276194236411
X	1587464	Hawaii	Tajima.D	-1.5007544356328522
X	1588644	Hawaii	Tajima.D	-1.4611903671340034
X	1589435	Hawaii	Tajima.D	-1.3092040899550978
X	1590196	Hawaii	Tajima.D	-1.2386292184990784
X	1591873	Hawaii	Tajima.D	-1.3157611332760322
X	1592772	Hawaii	Tajima.D	-1.2529221949362115
X	1592900	Hawaii	Tajima.D	-1.2008895673016111
X	1592965	Hawaii	Tajima.D	-1.2397621960580743
X	1593312	Hawaii	Tajima.D	-1.0901678750176322
X	1593683	Hawaii	Tajima.D	-1.0911567703434313
X	1594431	Hawaii	Tajima.D	-1.1337654287121564
X	1594701	Hawaii	Tajima.D	-1.2345015690526369
X	1595419	Hawaii	Tajima.D	-1.419034593978341
X	1603615	Hawaii	Tajima.D	-1.3526775750494393
X	1604469	Hawaii	Tajima.D	-1.4146545358944578
X	1604671	Hawaii	Tajima.D	-1.2669054992714097
X	1604672	Hawaii	Tajima.D	-1.3390331617925475
X	1604699	Hawaii	Tajima.D	-1.2669054992714097
X	1605226	Hawaii	Tajima.D	-1.2084846631930364
X	1605805	Hawaii	Tajima.D	-1.097094874553703
X	1609767	Hawaii	Tajima.D	-0.9874219289759728
X	1612219	Hawaii	Tajima.D	-0.914760350428713
X	1613913	Hawaii	Tajima.D	-1.0155383849520128
X	1614630	Hawaii	Tajima.D	-0.7096304980906998
X	1614874	Hawaii	Tajima.D	-0.8177019325968103
X	1615640	Hawaii	Tajima.D	-0.8416762110408694
X	1615938	Hawaii	Tajima.D	-0.8600407170615512
X	1615966	Hawaii	Tajima.D	-0.886219491026282
X	1616293	Hawaii	Tajima.D	-0.9569650931318657
X	1616796	Hawaii	Tajima.D	-1.0050588256543584
X	1617276	Hawaii	Tajima.D	-1.047299549945078
X	1618212	Hawaii	Tajima.D	-1.0891133252908431
X	1619365	Hawaii	Tajima.D	-1.0866008934166353
X	1621740	Hawaii	Tajima.D	-1.5458296262934346
X	1622269	Hawaii	Tajima.D	-1.462999765504177
X	1623320	Hawaii	Tajima.D	-1.5175962296680876
X	1624640	Hawaii	Tajima.D	-1.5116756524598325
X	1624705	Hawaii	Tajima.D	-1.5116637750105337
X	1625018	Hawaii	Tajima.D	-1.39163349081006
X	1625881	Hawaii	Tajima.D	-1.4380842277107864
X	1626436	Hawaii	Tajima.D	-1.330508069309705
X	1626466	Hawaii	Tajima.D	-1.1261378482288356
X	1626624	Hawaii	Tajima.D	-0.8079612971509628
X	1627069	Hawaii	Tajima.D	-0.5793559810394501
X	1671385	Hawaii	Tajima.D	-0.35099065061276025
X	1671721	Hawaii	Tajima.D	-0.6526716016981
X	1671802	Hawaii	Tajima.D	-0.6778199476640256
X	1672249	Hawaii	Tajima.D	-0.8159790411792237
X	1672522	Hawaii	Tajima.D	-0.7331753984781233
X	1676623	Hawaii	Tajima.D	-0.5074133358612108
X	1676666	Hawaii	Tajima.D	-0.5388747581652327
X	1676745	Hawaii	Tajima.D	-0.5289892797452252
X	1677611	Hawaii	Tajima.D	-0.5474903348306136
X	1678496	Hawaii	Tajima.D	-0.28443955268298365
X	1682051	Hawaii	Tajima.D	-0.06784269419038856
X	1683198	Hawaii	Tajima.D	0.14377847102769725
X	1683512	Hawaii	Tajima.D	0.054271338058552304
X	1684135	Hawaii	Tajima.D	0.1404849827222846
X	1684159	Hawaii	Tajima.D	0.17951035192856823
X	1684260	Hawaii	Tajima.D	0.146618350189859
X	1684304	Hawaii	Tajima.D	0.18894251988428087
X	1684333	Hawaii	Tajima.D	0.20810994102491284
X	1684497	Hawaii	Tajima.D	0.24466223757882996
X	1684908	Hawaii	Tajima.D	0.20234551717531815
X	1686013	Hawaii	Tajima.D	-0.1585462784328565
X	1686298	Hawaii	Tajima.D	-0.08139721471287784
X	1695098	Hawaii	Tajima.D	-0.6121080290610296
X	1695188	Hawaii	Tajima.D	-0.7972943516851443
X	1699118	Hawaii	Tajima.D	-1.0175958032926986
X	1699427	Hawaii	Tajima.D	-1.3645968499827144
X	1700031	Hawaii	Tajima.D	-1.4095223785043438
X	1700763	Hawaii	Tajima.D	-0.8537782965466053
X	1701424	Hawaii	Tajima.D	-0.8147051541711203
X	1701631	Hawaii	Tajima.D	-0.8564993064549924
X	1701722	Hawaii	Tajima.D	-0.8257115450498492
X	1701976	Hawaii	Tajima.D	-0.8907353255787157
X	1702001	Hawaii	Tajima.D	-0.8640095425570694
X	1702124	Hawaii	Tajima.D	-0.7709678794730425
X	1702734	Hawaii	Tajima.D	-0.3969104064432082
X	1703056	Hawaii	Tajima.D	-0.3559003407995054
X	1706468	Hawaii	Tajima.D	-1.1911211110974176
X	1713620	Hawaii	Tajima.D	-1.0427315611044228
X	1713669	Hawaii	Tajima.D	-1.0484439446785607
X	1713769	Hawaii	Tajima.D	-1.081763433378435
X	1713813	Hawaii	Tajima.D	-1.0563205045970574
X	1713827	Hawaii	Tajima.D	-1.0800977876764901
X	1713859	Hawaii	Tajima.D	-0.8699075979196904
X	1716253	Hawaii	Tajima.D	-1.1860969463963638
X	1716991	Hawaii	Tajima.D	-1.289941770275007
X	1718615	Hawaii	Tajima.D	-0.22478883506847536
X	1737677	Hawaii	Tajima.D	-0.7384521678382824
X	1737967	Hawaii	Tajima.D	-0.8945593068548003
X	1738047	Hawaii	Tajima.D	-1.0210011502113807
X	1738159	Hawaii	Tajima.D	-0.9101382061387705
X	1738295	Hawaii	Tajima.D	-1.0537580814669127
X	1743466	Hawaii	Tajima.D	-0.7751294766789453
X	1744227	Hawaii	Tajima.D	-1.1286089391623055
X	1744449	Hawaii	Tajima.D	-1.1409215058416458
X	1744534	Hawaii	Tajima.D	-1.1296399920990654
X	1744570	Hawaii	Tajima.D	-1.0989002690646985
X	1744963	Hawaii	Tajima.D	-1.1128771375063184
X	1745000	Hawaii	Tajima.D	-1.0860816188637206
X	1745000	Hawaii	Tajima.D	-1.0416835029851295
X	1745071	Hawaii	Tajima.D	-0.9659681292626026
X	1745429	Hawaii	Tajima.D	-1.3840225966813013
X	1751005	Hawaii	Tajima.D	0.2765285428238339
X	1751118	Hawaii	Tajima.D	0.09660985477825594
X	1752039	Hawaii	Tajima.D	0.4566374177478879
X	1825552	Hawaii	Tajima.D	2.9145721292844597
X	1825574	Hawaii	Tajima.D	1.9533666480068637
X	1828240	Hawaii	Tajima.D	1.9146367426476292
X	1828436	Hawaii	Tajima.D	1.3635526080644589
X	1829409	Hawaii	Tajima.D	1.256179098112038
X	1829441	Hawaii	Tajima.D	1.2360906559696838
X	1829457	Hawaii	Tajima.D	1.1283418575488533
X	1830049	Hawaii	Tajima.D	1.1479544001973019
X	1830062	Hawaii	Tajima.D	0.9227410422412717
X	1830212	Hawaii	Tajima.D	0.8590823099229823
X	1832910	Hawaii	Tajima.D	0.32728271592819974
X	1833308	Hawaii	Tajima.D	0.31613004825719127
X	1838333	Hawaii	Tajima.D	-0.009249790288163213
X	1838503	Hawaii	Tajima.D	-0.16518143359750317
X	1839670	Hawaii	Tajima.D	-0.016029540048001466
X	1841302	Hawaii	Tajima.D	-0.3588121478713624
X	1841748	Hawaii	Tajima.D	-0.3240518719822668
X	1842100	Hawaii	Tajima.D	-0.3422625174444545
X	1842418	Hawaii	Tajima.D	-0.31140257863083226
X	1843497	Hawaii	Tajima.D	-0.43824354583300495
X	1844284	Hawaii	Tajima.D	-0.5350464533543214
X	1845312	Hawaii	Tajima.D	-0.5970949962838751
X	1846186	Hawaii	Tajima.D	-0.7195860464237779
X	1847528	Hawaii	Tajima.D	-0.6743456744765205
X	1847813	Hawaii	Tajima.D	-0.8300976767147334
X	1849393	Hawaii	Tajima.D	-0.7409313842950468
X	1849965	Hawaii	Tajima.D	-0.7556607479252765
X	1851111	Hawaii	Tajima.D	-0.764906554273388
X	1852033	Hawaii	Tajima.D	-0.9057236600529887
X	1853225	Hawaii	Tajima.D	-0.8095237029903533
X	1853655	Hawaii	Tajima.D	-0.7142960362061487
X	1854059	Hawaii	Tajima.D	-0.7330889568453212
X	1855379	Hawaii	Tajima.D	-0.7284637044697677
X	1856382	Hawaii	Tajima.D	-0.8098231924650862
X	1857799	Hawaii	Tajima.D	-0.780311953586907
X	1860382	Hawaii	Tajima.D	-0.8983920119603996
X	1860887	Hawaii	Tajima.D	-1.012086932934719
X	1861858	Hawaii	Tajima.D	-1.0875664268933138
X	1862862	Hawaii	Tajima.D	-1.109594672832144
X	1863477	Hawaii	Tajima.D	-1.1404066353590347
X	1863788	Hawaii	Tajima.D	-1.2145316461286588
X	1864198	Hawaii	Tajima.D	-1.2153616753907959
X	1865078	Hawaii	Tajima.D	-1.179602742973414
X	1865832	Hawaii	Tajima.D	-1.1671788837143178
X	1866766	Hawaii	Tajima.D	-1.2760521240821783
X	1868761	Hawaii	Tajima.D	-1.2013770443747445
X	1869286	Hawaii	Tajima.D	-0.9613687728206298
X	1870360	Hawaii	Tajima.D	-0.7947794820751234
X	1872770	Hawaii	Tajima.D	-0.717928950641359
X	1873612	Hawaii	Tajima.D	-0.6714600838127738
X	1874057	Hawaii	Tajima.D	-0.6202861570966076
X	1875687	Hawaii	Tajima.D	-0.517510378127862
X	1876054	Hawaii	Tajima.D	-0.7340551958256786
X	1876310	Hawaii	Tajima.D	-0.7404184776410572
X	1876608	Hawaii	Tajima.D	-0.6289740553835984
X	1877268	Hawaii	Tajima.D	-0.7463969881210795
X	1877418	Hawaii	Tajima.D	-0.9957919869720139
X	1878548	Hawaii	Tajima.D	-1.2449121201858235
X	1879867	Hawaii	Tajima.D	-1.29937479436722
X	1880154	Hawaii	Tajima.D	-1.5277809637302986
X	1880223	Hawaii	Tajima.D	-1.470676891960726
X	1880487	Hawaii	Tajima.D	-1.571924929114151
X	1881177	Hawaii	Tajima.D	-1.1550896215013244
X	1882121	Hawaii	Tajima.D	-0.8778877448270228
X	1908498	Hawaii	Tajima.D	0.6547176967397018
X	1909161	Hawaii	Tajima.D	0.15898311664291054
X	1909647	Hawaii	Tajima.D	-0.4044469249253602
X	1910875	Hawaii	Tajima.D	-0.3319286108072502
X	1911084	Hawaii	Tajima.D	-0.26162934886847994
X	1911396	Hawaii	Tajima.D	-0.17274142266789025
X	1911402	Hawaii	Tajima.D	-0.18975695851250615
X	1911474	Hawaii	Tajima.D	-0.11468696253006232
X	1911538	Hawaii	Tajima.D	-0.19183602669305413
X	1911795	Hawaii	Tajima.D	-0.29156944230038334
X	1913624	Hawaii	Tajima.D	-0.4133858193298057
X	1915424	Hawaii	Tajima.D	-0.5955709727443577
X	1916697	Hawaii	Tajima.D	-0.5032068260075427
X	1918065	Hawaii	Tajima.D	-0.4580967495821038
X	1918260	Hawaii	Tajima.D	-0.475622797493487
X	1918456	Hawaii	Tajima.D	-0.5607677093722192
X	1919527	Hawaii	Tajima.D	-0.871822951085198
X	1920453	Hawaii	Tajima.D	-1.0574200126059632
X	1921941	Hawaii	Tajima.D	-1.1539643923039336
X	1924727	Hawaii	Tajima.D	-1.158832536667777
X	1924978	Hawaii	Tajima.D	-1.2587165732993622
X	1925492	Hawaii	Tajima.D	-1.0804946899256542
X	1925565	Hawaii	Tajima.D	-1.1261976548672692
X	1925907	Hawaii	Tajima.D	-1.346064977506622
X	1926060	Hawaii	Tajima.D	-1.4323905947694295
X	1926208	Hawaii	Tajima.D	-1.4561003556801027
X	1926862	Hawaii	Tajima.D	-1.1867822950398383
X	1927480	Hawaii	Tajima.D	-1.014919281003017
X	1929139	Hawaii	Tajima.D	-0.7692588797435964
X	1929357	Hawaii	Tajima.D	-0.6055632881237414
X	1933715	Hawaii	Tajima.D	-1.0433394686325215
X	1981713	Hawaii	Tajima.D	-0.7297482861602715
X	1981877	Hawaii	Tajima.D	-1.1859656971602617
X	1982502	Hawaii	Tajima.D	-1.2261248662049227
X	1983207	Hawaii	Tajima.D	-1.0898091898445426
X	1983247	Hawaii	Tajima.D	-1.1635394633970586
X	1983701	Hawaii	Tajima.D	-1.3068274091091714
X	1984198	Hawaii	Tajima.D	-1.1037570363384004
X	1984691	Hawaii	Tajima.D	-1.126644437005236
X	1985174	Hawaii	Tajima.D	-1.1420400696986577
X	1986670	Hawaii	Tajima.D	-1.17778081352306
X	1987042	Hawaii	Tajima.D	-1.083042834601132
X	1987600	Hawaii	Tajima.D	-1.0499323721393181
X	1988064	Hawaii	Tajima.D	-1.1174987872625892
X	1988079	Hawaii	Tajima.D	-1.049120212191417
X	1988456	Hawaii	Tajima.D	-0.8290322933907359
X	1988950	Hawaii	Tajima.D	-1.108949968966878
X	1989348	Hawaii	Tajima.D	-1.0080562154451804
X	2012736	Hawaii	Tajima.D	-0.9096464376190495
X	2013198	Hawaii	Tajima.D	-1.2185469105410434
X	2013418	Hawaii	Tajima.D	-1.0788197223796854
X	2013886	Hawaii	Tajima.D	-1.059597198138051
X	2014253	Hawaii	Tajima.D	-1.05744192815222
X	2015897	Hawaii	Tajima.D	-1.450788184540255
X	2016567	Hawaii	Tajima.D	-1.664907743078422
X	2017885	Hawaii	Tajima.D	-1.7020941397442415
X	2017967	Hawaii	Tajima.D	-1.6083861950542284
X	2018330	Hawaii	Tajima.D	-1.5468658866500167
X	2018926	Hawaii	Tajima.D	-1.5609508719521754
X	2019128	Hawaii	Tajima.D	-1.5480691018907895
X	2019442	Hawaii	Tajima.D	-1.5710603419906053
X	2019680	Hawaii	Tajima.D	-1.4895272666197046
X	2019735	Hawaii	Tajima.D	-1.5175782369301092
X	2021143	Hawaii	Tajima.D	-1.3389043581019313
X	2022367	Hawaii	Tajima.D	-1.1351920390020989
X	2023037	Hawaii	Tajima.D	-0.8840770482692198
X	2023250	Hawaii	Tajima.D	-0.9624653108361165
X	2024596	Hawaii	Tajima.D	-0.7144260895890789
X	2028167	Hawaii	Tajima.D	0.11900908400149267
X	2031933	Hawaii	Tajima.D	0.5180368979126787
X	2032193	Hawaii	Tajima.D	0.6712139758238759
X	2032789	Hawaii	Tajima.D	0.8538258334793289
X	2033207	Hawaii	Tajima.D	1.0245322587470873
X	2035126	Hawaii	Tajima.D	1.096898237947658
X	2035880	Hawaii	Tajima.D	1.5128285834139967
X	2036822	Hawaii	Tajima.D	1.4791419414170908
X	2037244	Hawaii	Tajima.D	1.4752665387241237
X	2038453	Hawaii	Tajima.D	1.4651025292041713
X	2038826	Hawaii	Tajima.D	1.5193070976096137
X	2039130	Hawaii	Tajima.D	1.3354076318044665
X	2039295	Hawaii	Tajima.D	1.3338954994627439
X	2039824	Hawaii	Tajima.D	1.237108226826602
X	2040481	Hawaii	Tajima.D	0.939403781349786
X	2041165	Hawaii	Tajima.D	0.668059113607452
X	2041963	Hawaii	Tajima.D	0.30727618423245695
X	2045180	Hawaii	Tajima.D	-0.3516500530295249
X	2046677	Hawaii	Tajima.D	-0.8085488447825996
X	2048790	Hawaii	Tajima.D	-1.2612386245105425
X	2049070	Hawaii	Tajima.D	-1.410719541204564
X	2049489	Hawaii	Tajima.D	-1.3849493821357168
X	2049844	Hawaii	Tajima.D	-1.3982734522267621
X	2050348	Hawaii	Tajima.D	-1.486117164860337
X	2050562	Hawaii	Tajima.D	-1.4603823690494058
X	2051051	Hawaii	Tajima.D	-1.3627893172367256
X	2051531	Hawaii	Tajima.D	-1.428138042276813
X	2052913	Hawaii	Tajima.D	-1.1949232608437694
X	2054029	Hawaii	Tajima.D	-0.992410839248729
X	2054302	Hawaii	Tajima.D	-0.869868316868334
X	2054723	Hawaii	Tajima.D	-0.9942457361980109
X	2054861	Hawaii	Tajima.D	-0.9943327626239175
X	2055341	Hawaii	Tajima.D	-0.9864342978959136
X	2078824	Hawaii	Tajima.D	-0.884451896900334
X	2079236	Hawaii	Tajima.D	-1.0950120688477276
X	2080209	Hawaii	Tajima.D	-1.3234997445140284
X	2080339	Hawaii	Tajima.D	-1.1787168206104781
X	2080476	Hawaii	Tajima.D	-1.327122047931385
X	2080637	Hawaii	Tajima.D	-1.2263778712550246
X	2081343	Hawaii	Tajima.D	-1.156433239127945
X	2081533	Hawaii	Tajima.D	-0.9704094815613346
X	2082233	Hawaii	Tajima.D	-0.935168481158725
X	2082942	Hawaii	Tajima.D	-0.8621066792562554
X	2083499	Hawaii	Tajima.D	-0.6032019886934926
X	2084159	Hawaii	Tajima.D	-0.6245136718492781
X	2084398	Hawaii	Tajima.D	-0.2853996195817785
X	2085105	Hawaii	Tajima.D	0.3898142026824011
X	2094420	Hawaii	Tajima.D	1.4088054994544403
X	2094872	Hawaii	Tajima.D	1.4974267594041502
X	2095229	Hawaii	Tajima.D	1.1199590237301977
X	2095513	Hawaii	Tajima.D	0.8174290905046966
X	2095962	Hawaii	Tajima.D	0.5449465992363018
X	2096192	Hawaii	Tajima.D	0.3725744874468727
X	2096789	Hawaii	Tajima.D	0.3079490514674161
X	2096878	Hawaii	Tajima.D	0.27734075207019965
X	2097312	Hawaii	Tajima.D	0.08839182768389449
X	2098153	Hawaii	Tajima.D	-0.16242034875379374
X	2099153	Hawaii	Tajima.D	-0.4461948051207506
X	2100416	Hawaii	Tajima.D	-0.7271775222338017
X	2102083	Hawaii	Tajima.D	-0.7260504882793962
X	2102708	Hawaii	Tajima.D	-0.6755497511092147
X	2103468	Hawaii	Tajima.D	-0.7113832157083545
X	2104111	Hawaii	Tajima.D	-0.7231998799013516
X	2106016	Hawaii	Tajima.D	-0.9672935587815188
X	2106258	Hawaii	Tajima.D	-0.8333720349739596
X	2107748	Hawaii	Tajima.D	-0.7316412128599435
X	2108708	Hawaii	Tajima.D	-0.6687675250677658
X	2108923	Hawaii	Tajima.D	-0.6980960551222131
X	2110077	Hawaii	Tajima.D	-0.7736612363695151
X	2111424	Hawaii	Tajima.D	-1.010646424075476
X	2113232	Hawaii	Tajima.D	-0.9171208916148558
X	2115771	Hawaii	Tajima.D	-0.7029349227827548
X	2116652	Hawaii	Tajima.D	-0.5117554996577658
X	2117287	Hawaii	Tajima.D	-0.16341514356331385
X	2118210	Hawaii	Tajima.D	-0.06766940515953522
X	2118862	Hawaii	Tajima.D	0.019776174980912522
X	2119333	Hawaii	Tajima.D	0.09635714349406688
X	2119872	Hawaii	Tajima.D	0.07788964423047953
X	2120315	Hawaii	Tajima.D	0.04801899765235707
X	2120924	Hawaii	Tajima.D	0.09051565970508962
X	2121775	Hawaii	Tajima.D	0.06178623746912267
X	2122301	Hawaii	Tajima.D	-0.005038385670760793
X	2123554	Hawaii	Tajima.D	-0.23986949009819677
X	2124094	Hawaii	Tajima.D	-0.5226190439154658
X	2125873	Hawaii	Tajima.D	-0.8407979902089844
X	2127537	Hawaii	Tajima.D	-1.091804327406537
X	2129573	Hawaii	Tajima.D	-1.2011398023037245
X	2129964	Hawaii	Tajima.D	-1.146648904981481
X	2132288	Hawaii	Tajima.D	-1.012634401591701
X	2133005	Hawaii	Tajima.D	-0.9572908433385307
X	2133755	Hawaii	Tajima.D	-0.9161465909409058
X	2134409	Hawaii	Tajima.D	-0.9127188531630863
X	2135556	Hawaii	Tajima.D	-0.9514800882845167
X	2136933	Hawaii	Tajima.D	-0.8413072076357737
X	2137114	Hawaii	Tajima.D	-0.8339545489957852
X	2137453	Hawaii	Tajima.D	-0.807632921089391
X	2138786	Hawaii	Tajima.D	-0.735403005606524
X	2139431	Hawaii	Tajima.D	-0.8356947768477961
X	2140688	Hawaii	Tajima.D	-0.8215958285206388
X	2142201	Hawaii	Tajima.D	-0.8106437090480487
X	2142521	Hawaii	Tajima.D	-0.7908325219774499
X	2144234	Hawaii	Tajima.D	-0.7549134151123121
X	2145756	Hawaii	Tajima.D	-0.7667753823558602
X	2146173	Hawaii	Tajima.D	-0.8945958724172867
X	2146489	Hawaii	Tajima.D	-0.9564273698097112
X	2146545	Hawaii	Tajima.D	-1.0017013041650045
X	2148523	Hawaii	Tajima.D	-0.9930961852966113
X	2148787	Hawaii	Tajima.D	-0.9069777382789107
X	2149132	Hawaii	Tajima.D	-0.9629874115068997
X	2150007	Hawaii	Tajima.D	-1.124951153384636
X	2150345	Hawaii	Tajima.D	-1.394293743559668
X	2150625	Hawaii	Tajima.D	-1.161048819021386
X	2151253	Hawaii	Tajima.D	-1.0692253616476672
X	2211638	Hawaii	Tajima.D	-0.48037962856634364
X	2212023	Hawaii	Tajima.D	-1.1735153993552976
X	2212669	Hawaii	Tajima.D	-1.112094882841689
X	2214127	Hawaii	Tajima.D	-1.0368106191353594
X	2214210	Hawaii	Tajima.D	-1.0470984705305884
X	2214392	Hawaii	Tajima.D	-1.1553450342704539
X	2214732	Hawaii	Tajima.D	-1.0307073850295956
X	2215194	Hawaii	Tajima.D	-0.9719493646444877
X	2215773	Hawaii	Tajima.D	-1.034955884831818
X	2217049	Hawaii	Tajima.D	-1.1033949698314083
X	2218794	Hawaii	Tajima.D	-0.8556146899559218
X	2219241	Hawaii	Tajima.D	-0.6883391616589059
X	2220445	Hawaii	Tajima.D	-0.6981800070025492
X	2220940	Hawaii	Tajima.D	-0.7391462173954829
X	2221290	Hawaii	Tajima.D	-0.8206659880208391
X	2222157	Hawaii	Tajima.D	-0.6679708370777132
X	2223944	Hawaii	Tajima.D	-0.799607863491528
X	2225877	Hawaii	Tajima.D	-0.7063788917680979
X	2227349	Hawaii	Tajima.D	-0.6258836410331955
X	2228311	Hawaii	Tajima.D	-0.6238481778374504
X	2228764	Hawaii	Tajima.D	-0.7173805773881596
X	2229665	Hawaii	Tajima.D	-0.9400185523145743
X	2230662	Hawaii	Tajima.D	-0.9429091870599959
X	2230779	Hawaii	Tajima.D	-0.925524431756398
X	2231187	Hawaii	Tajima.D	-0.8615390978762093
X	2231548	Hawaii	Tajima.D	-0.9269511599718183
X	2231908	Hawaii	Tajima.D	-0.8836453459571252
X	2232175	Hawaii	Tajima.D	-1.049740740335614
X	2232439	Hawaii	Tajima.D	-1.1198136217838188
X	2233259	Hawaii	Tajima.D	-1.2238172300601162
X	2234058	Hawaii	Tajima.D	-1.2703343768570363
X	2234216	Hawaii	Tajima.D	-0.9821483480609604
X	2246693	Hawaii	Tajima.D	-1.0915841813141036
X	2246982	Hawaii	Tajima.D	-1.358376369526084
X	2247163	Hawaii	Tajima.D	-1.5326233935364475
X	2247818	Hawaii	Tajima.D	-1.1482168649135922
X	2248997	Hawaii	Tajima.D	-1.2302863958575556
X	2249079	Hawaii	Tajima.D	-1.277580374858818
X	2249207	Hawaii	Tajima.D	-1.2863161198124722
X	2249451	Hawaii	Tajima.D	-1.2986546079277475
X	2249970	Hawaii	Tajima.D	-1.3086164090504946
X	2250592	Hawaii	Tajima.D	-1.3316454928184154
X	2251143	Hawaii	Tajima.D	-1.3888708685183726
X	2253568	Hawaii	Tajima.D	-1.326006674002225
X	2254153	Hawaii	Tajima.D	-1.1622899121972903
X	2255220	Hawaii	Tajima.D	-1.2674283146632872
X	2255881	Hawaii	Tajima.D	-1.1872340453892396
X	2256242	Hawaii	Tajima.D	-1.20857887235203
X	2257405	Hawaii	Tajima.D	-1.2084953645126186
X	2258110	Hawaii	Tajima.D	-1.2289953219618426
X	2259688	Hawaii	Tajima.D	-1.102023978197778
X	2261147	Hawaii	Tajima.D	-0.9830124638408688
X	2262390	Hawaii	Tajima.D	-0.9228642087398167
X	2263322	Hawaii	Tajima.D	-0.770750891959091
X	2264131	Hawaii	Tajima.D	-0.8307431015110721
X	2265246	Hawaii	Tajima.D	-1.0406588823192697
X	2265416	Hawaii	Tajima.D	-1.0741449335153306
X	2266017	Hawaii	Tajima.D	-0.8763889320666883
X	2266336	Hawaii	Tajima.D	-0.8567969197368523
X	2267035	Hawaii	Tajima.D	-0.6335775562512502
X	2269591	Hawaii	Tajima.D	-0.5683411383472402
X	2271859	Hawaii	Tajima.D	-0.3941322118666056
X	2273074	Hawaii	Tajima.D	-0.3297285324379113
X	2274136	Hawaii	Tajima.D	-0.5450003154803489
X	2274323	Hawaii	Tajima.D	-0.6787250527996883
X	2275888	Hawaii	Tajima.D	-0.5457740312039394
X	2276135	Hawaii	Tajima.D	-0.5997415857889733
X	2277636	Hawaii	Tajima.D	-0.7582704892367996
X	2278084	Hawaii	Tajima.D	-0.7520472705869552
X	2279122	Hawaii	Tajima.D	-0.7694396016537
X	2279772	Hawaii	Tajima.D	-0.8777674187484596
X	2280342	Hawaii	Tajima.D	-1.1319812905730402
X	2281596	Hawaii	Tajima.D	-1.1407388384846724
X	2282757	Hawaii	Tajima.D	-1.217574012048848
X	2283004	Hawaii	Tajima.D	-1.172895962304761
X	2285871	Hawaii	Tajima.D	-1.1136082425714757
X	2286704	Hawaii	Tajima.D	-1.081933334465311
X	2286982	Hawaii	Tajima.D	-1.0410146127523026
X	2287219	Hawaii	Tajima.D	-0.9391108248372546
X	2289654	Hawaii	Tajima.D	-1.045403380026537
X	2289957	Hawaii	Tajima.D	-1.1371155815659855
X	2290301	Hawaii	Tajima.D	-1.0802648239513397
X	2292833	Hawaii	Tajima.D	-1.0847620975250374
X	2293076	Hawaii	Tajima.D	-0.9888408048231011
X	2293140	Hawaii	Tajima.D	-1.0005217172066285
X	2293783	Hawaii	Tajima.D	-0.9696272340268421
X	2293981	Hawaii	Tajima.D	-0.9186713597839216
X	2294230	Hawaii	Tajima.D	-0.9633765368932868
X	2296152	Hawaii	Tajima.D	-1.2866615018413095
X	2297327	Hawaii	Tajima.D	-1.3103861179725809
X	2300998	Hawaii	Tajima.D	-1.261428639911454
X	2301473	Hawaii	Tajima.D	-1.3629538421688763
X	2302365	Hawaii	Tajima.D	-1.2577586813829014
X	2302470	Hawaii	Tajima.D	-1.3804240296365622
X	2305300	Hawaii	Tajima.D	-1.0005256725465344
X	2306220	Hawaii	Tajima.D	-0.8665436182980146
X	2306584	Hawaii	Tajima.D	-1.021153973258817
X	2308190	Hawaii	Tajima.D	-0.9943858199218605
X	2308909	Hawaii	Tajima.D	-0.7896862566777383
X	2309661	Hawaii	Tajima.D	-0.7368336396078757
X	2310718	Hawaii	Tajima.D	-0.8212539883075548
X	2311550	Hawaii	Tajima.D	-0.681241615042838
X	2312620	Hawaii	Tajima.D	-0.8082038730673111
X	2313328	Hawaii	Tajima.D	-0.7582704892367996
X	2313826	Hawaii	Tajima.D	-0.9407263964030601
X	2314092	Hawaii	Tajima.D	-1.070837044180609
X	2314148	Hawaii	Tajima.D	-0.9980733340930005
X	2314522	Hawaii	Tajima.D	-0.9818965299695279
X	2314893	Hawaii	Tajima.D	-0.9735828878239965
X	2315717	Hawaii	Tajima.D	-1.1932566336058688
X	2316263	Hawaii	Tajima.D	-1.147886041606794
X	2317250	Hawaii	Tajima.D	-1.462882699528048
X	2317557	Hawaii	Tajima.D	-0.9835589872747228
X	2362338	Hawaii	Tajima.D	-1.0020457722888045
X	2362592	Hawaii	Tajima.D	-0.9519918866556627
X	2362883	Hawaii	Tajima.D	-0.8772572278989289
X	2364034	Hawaii	Tajima.D	-0.7177874723497795
X	2364742	Hawaii	Tajima.D	-0.6570298071149914
X	2367299	Hawaii	Tajima.D	-0.5208838954934002
X	2367677	Hawaii	Tajima.D	-0.5896777255076572
X	2368569	Hawaii	Tajima.D	-0.7118971573091876
X	2370239	Hawaii	Tajima.D	-0.604936137702518
X	2370306	Hawaii	Tajima.D	-0.5933584189139001
X	2370381	Hawaii	Tajima.D	-0.6172869250702169
X	2371187	Hawaii	Tajima.D	-0.7263224955709278
X	2371305	Hawaii	Tajima.D	-0.7478904348105014
X	2372148	Hawaii	Tajima.D	-0.7097637885571173
X	2372702	Hawaii	Tajima.D	-0.6175877426446038
X	2375169	Hawaii	Tajima.D	-0.6711611040726839
X	2375482	Hawaii	Tajima.D	-0.6439602950548459
X	2376414	Hawaii	Tajima.D	-0.510189084144009
X	2377111	Hawaii	Tajima.D	-0.5170338032385535
X	2377121	Hawaii	Tajima.D	-0.45104568932180833
X	2378057	Hawaii	Tajima.D	-0.4457753205140614
X	2378746	Hawaii	Tajima.D	-0.32546686762646987
X	2385465	Hawaii	Tajima.D	-0.7999726119288608
X	2386174	Hawaii	Tajima.D	-1.195878633848391
X	2387153	Hawaii	Tajima.D	-1.3108129135895479
X	2388488	Hawaii	Tajima.D	-1.4137347146515544
X	2389009	Hawaii	Tajima.D	-1.4831238648495082
X	2389009	Hawaii	Tajima.D	-1.5204180058610894
X	2389567	Hawaii	Tajima.D	-1.527315418175813
X	2389873	Hawaii	Tajima.D	-1.6667890883420313
X	2390438	Hawaii	Tajima.D	-1.5542186669931337
X	2390583	Hawaii	Tajima.D	-1.5697027032642101
X	2390750	Hawaii	Tajima.D	-1.5928092005216166
X	2391351	Hawaii	Tajima.D	-1.4613117069323422
X	2418457	Hawaii	Tajima.D	0.29543194729304667
X	2419128	Hawaii	Tajima.D	0.21083622621783377
X	2419800	Hawaii	Tajima.D	0.735937397612578
X	2419891	Hawaii	Tajima.D	0.8327357024755688
X	2420130	Hawaii	Tajima.D	0.13914208014488605
X	2420248	Hawaii	Tajima.D	0.25454967410528584
X	2421914	Hawaii	Tajima.D	-0.15232253732443438
X	2422740	Hawaii	Tajima.D	-0.22281787551822485
X	2423885	Hawaii	Tajima.D	-0.19260957932896272
X	2424385	Hawaii	Tajima.D	-0.20569060477261492
X	2424963	Hawaii	Tajima.D	-0.2540359039590193
X	2425097	Hawaii	Tajima.D	-0.26467952158429325
X	2425333	Hawaii	Tajima.D	-0.5014460559509071
X	2425465	Hawaii	Tajima.D	-0.5545363912259617
X	2425748	Hawaii	Tajima.D	-0.39393537505205506
X	2425855	Hawaii	Tajima.D	-0.5174395010957078
X	2426080	Hawaii	Tajima.D	-0.25212925730510055
X	2427022	Hawaii	Tajima.D	-0.3282126662680731
X	2435999	Hawaii	Tajima.D	-0.9012626158573109
X	2437247	Hawaii	Tajima.D	-0.9391855237284945
X	2437520	Hawaii	Tajima.D	-1.0439630164411926
X	2437810	Hawaii	Tajima.D	-1.0728651785688468
X	2437972	Hawaii	Tajima.D	-1.1304164191377166
X	2438811	Hawaii	Tajima.D	-1.0922815897507712
X	2439048	Hawaii	Tajima.D	-0.9976421725386743
X	2439223	Hawaii	Tajima.D	-1.0098990053098706
X	2439286	Hawaii	Tajima.D	-1.036236589648181
X	2439354	Hawaii	Tajima.D	-1.1162919117140624
X	2440298	Hawaii	Tajima.D	-0.9665194474374327
X	2441395	Hawaii	Tajima.D	-1.1316254272872575
X	2442143	Hawaii	Tajima.D	-1.014701428079403
X	2445003	Hawaii	Tajima.D	-1.0778365526483715
X	2446578	Hawaii	Tajima.D	-0.7344065527685263
X	2447635	Hawaii	Tajima.D	-0.8122263346599831
X	2448890	Hawaii	Tajima.D	-1.0079002253761356
X	2449392	Hawaii	Tajima.D	-1.0634875529494332
X	2450321	Hawaii	Tajima.D	-1.16667637675005
X	2451741	Hawaii	Tajima.D	-1.1500667813087748
X	2452272	Hawaii	Tajima.D	-1.2710671740547175
X	2452383	Hawaii	Tajima.D	-1.2052698178887478
X	2452935	Hawaii	Tajima.D	-1.2986788962027322
X	2453188	Hawaii	Tajima.D	-1.233768933992456
X	2453944	Hawaii	Tajima.D	-1.6865575696038202
X	2454431	Hawaii	Tajima.D	-1.6379930430400569
X	2454646	Hawaii	Tajima.D	-1.6882602430123088
X	2454997	Hawaii	Tajima.D	-1.706919061905423
X	2455379	Hawaii	Tajima.D	-1.4920198438994687
X	2493581	Hawaii	Tajima.D	-1.342143636554342
X	2494514	Hawaii	Tajima.D	-0.6759007508073138
X	2500313	Hawaii	Tajima.D	-1.0401675291781445
X	2500800	Hawaii	Tajima.D	-1.288717563747759
X	2500875	Hawaii	Tajima.D	-1.1176702955103293
X	2501093	Hawaii	Tajima.D	-1.0009766158208853
X	2501737	Hawaii	Tajima.D	-1.107829876791943
X	2502928	Hawaii	Tajima.D	-0.8351340354908191
X	2503782	Hawaii	Tajima.D	-0.5272939747165113
X	2505140	Hawaii	Tajima.D	-0.48643856679814357
X	2505793	Hawaii	Tajima.D	-0.5867884161642111
X	2505923	Hawaii	Tajima.D	-0.6612129280384109
X	2506948	Hawaii	Tajima.D	-0.5890324287379023
X	2507217	Hawaii	Tajima.D	-0.44885005506651027
X	2507461	Hawaii	Tajima.D	-0.5005375864470689
X	2507776	Hawaii	Tajima.D	-0.5021310858661169
X	2508631	Hawaii	Tajima.D	-0.4902910542613546
X	2509212	Hawaii	Tajima.D	-0.4781742926236226
X	2510063	Hawaii	Tajima.D	-0.6590023253149913
X	2512016	Hawaii	Tajima.D	-0.6661322792238161
X	2514342	Hawaii	Tajima.D	-0.6691186724310438
X	2515273	Hawaii	Tajima.D	-0.4458615554423196
X	2515727	Hawaii	Tajima.D	-0.48161431815012057
X	2517797	Hawaii	Tajima.D	-0.44177331336949593
X	2517816	Hawaii	Tajima.D	-0.415223076829596
X	2518017	Hawaii	Tajima.D	-0.36661455067880927
X	2518608	Hawaii	Tajima.D	-0.34339556622184336
X	2519685	Hawaii	Tajima.D	-0.49060383569239774
X	2520053	Hawaii	Tajima.D	-0.6827839148440383
X	2520772	Hawaii	Tajima.D	-1.002724615982567
X	2521174	Hawaii	Tajima.D	-0.7062310848771309
X	2526517	Hawaii	Tajima.D	-0.8139823159054131
X	2528040	Hawaii	Tajima.D	-0.8397179963876643
X	2529747	Hawaii	Tajima.D	-0.8386760756489235
X	2530124	Hawaii	Tajima.D	-1.0028334959612515
X	2530645	Hawaii	Tajima.D	-0.989169931710786
X	2530967	Hawaii	Tajima.D	-1.0128183054655224
X	2531909	Hawaii	Tajima.D	-0.9481542110730945
X	2532419	Hawaii	Tajima.D	-0.9407145185793665
X	2532910	Hawaii	Tajima.D	-0.8757771363252673
X	2533197	Hawaii	Tajima.D	-0.9673036208371392
X	2533320	Hawaii	Tajima.D	-1.0663062943169852
X	2534943	Hawaii	Tajima.D	-1.0971505647100288
X	2536346	Hawaii	Tajima.D	-1.024747085976774
X	2537475	Hawaii	Tajima.D	-1.014916139740872
X	2541186	Hawaii	Tajima.D	-0.856009829985698
X	2541446	Hawaii	Tajima.D	-0.7609694944935966
X	2541895	Hawaii	Tajima.D	-0.6061171021451344
X	2543072	Hawaii	Tajima.D	-0.4969329015885207
X	2543426	Hawaii	Tajima.D	-0.5312868653676576
X	2543686	Hawaii	Tajima.D	-0.5110870099228916
X	2544942	Hawaii	Tajima.D	-0.5822372869326704
X	2545461	Hawaii	Tajima.D	-0.5634946480817411
X	2547037	Hawaii	Tajima.D	-0.5203572391181444
X	2547468	Hawaii	Tajima.D	-0.33466616964636936
X	2548665	Hawaii	Tajima.D	-0.3668718589415427
X	2549002	Hawaii	Tajima.D	-0.39381167835909997
X	2549159	Hawaii	Tajima.D	-0.6192439438615382
X	2549481	Hawaii	Tajima.D	-0.6524194449899682
X	2549570	Hawaii	Tajima.D	-0.4905672480931535
X	2549649	Hawaii	Tajima.D	-0.5392594614295989
X	2551911	Hawaii	Tajima.D	0.04580221511156141
X	2551946	Hawaii	Tajima.D	0.5318186328411253
X	2552093	Hawaii	Tajima.D	1.621304083182352
X	2567752	Hawaii	Tajima.D	-1.2836425406867948
X	2567972	Hawaii	Tajima.D	-1.391659057348197
X	2568999	Hawaii	Tajima.D	-1.533313588826617
X	2570002	Hawaii	Tajima.D	-0.5578027291433093
X	2570656	Hawaii	Tajima.D	-0.7476238157474144
X	2570840	Hawaii	Tajima.D	-0.9619697814409891
X	2571052	Hawaii	Tajima.D	-0.903964240779604
X	2571156	Hawaii	Tajima.D	-0.9027410327205895
X	2571525	Hawaii	Tajima.D	-0.925895540162769
X	2571693	Hawaii	Tajima.D	-1.1148344558085808
X	2571766	Hawaii	Tajima.D	-0.997782829624542
X	2572769	Hawaii	Tajima.D	-1.0515398866214622
X	2575065	Hawaii	Tajima.D	-0.9631992494690181
X	2577053	Hawaii	Tajima.D	-1.0811310860542687
X	2579007	Hawaii	Tajima.D	-1.126384483278078
X	2579235	Hawaii	Tajima.D	-0.9845362068790627
X	2579471	Hawaii	Tajima.D	-1.0390313490271408
X	2579704	Hawaii	Tajima.D	-1.0426602125901412
X	2579915	Hawaii	Tajima.D	-1.0388777259198307
X	2580040	Hawaii	Tajima.D	-0.8736428963790696
X	2580219	Hawaii	Tajima.D	-0.9247583007124706
X	2580704	Hawaii	Tajima.D	-0.8581115847519
X	2581573	Hawaii	Tajima.D	-0.8524612018143093
X	2581985	Hawaii	Tajima.D	-1.0812097588261798
X	2582560	Hawaii	Tajima.D	-0.7309433671844271
X	2583324	Hawaii	Tajima.D	-1.2042045012769478
X	2588892	Hawaii	Tajima.D	-1.0433394686325215
X	2600906	Hawaii	Tajima.D	-1.2836425406867948
X	2600906	Hawaii	Tajima.D	-1.342143636554342
X	2601001	Hawaii	Tajima.D	-0.6494018937396329
X	2623141	Hawaii	Tajima.D	0.9094169228458068
X	2623574	Hawaii	Tajima.D	1.0641976783100482
X	2624245	Hawaii	Tajima.D	0.6138386585988089
X	2624547	Hawaii	Tajima.D	0.7418879373225451
X	2624873	Hawaii	Tajima.D	0.43629125547286113
X	2625323	Hawaii	Tajima.D	0.11780716251517045
X	2625501	Hawaii	Tajima.D	-0.05453622908220041
X	2626115	Hawaii	Tajima.D	0.06458646505713948
X	2627294	Hawaii	Tajima.D	0.12189719483820835
X	2627353	Hawaii	Tajima.D	0.07181383484961025
X	2628520	Hawaii	Tajima.D	-0.04663804721504552
X	2630092	Hawaii	Tajima.D	-0.3994711588090096
X	2630244	Hawaii	Tajima.D	-0.3524685558369857
X	2630649	Hawaii	Tajima.D	-0.461045991937994
X	2631161	Hawaii	Tajima.D	-0.3286447034460426
X	2631504	Hawaii	Tajima.D	-0.08061418312055436
X	2633691	Hawaii	Tajima.D	-0.35995805419456917
X	2634260	Hawaii	Tajima.D	-0.7267372973344294
X	2639716	Hawaii	Tajima.D	-1.0435390050243432
X	2640540	Hawaii	Tajima.D	-0.9624653108361165
X	2641172	Hawaii	Tajima.D	-1.1931885140616882
X	2641309	Hawaii	Tajima.D	-1.1778394516828232
X	2641420	Hawaii	Tajima.D	-1.1009786824305634
X	2641702	Hawaii	Tajima.D	-1.0546141649300127
X	2642514	Hawaii	Tajima.D	-0.8904888730212871
X	2643157	Hawaii	Tajima.D	-1.0402453504487499
X	2646078	Hawaii	Tajima.D	-0.9973455683088801
X	2646732	Hawaii	Tajima.D	-0.998583687705017
X	2647872	Hawaii	Tajima.D	-0.9467413985369066
X	2648095	Hawaii	Tajima.D	-0.9781290880300242
X	2648882	Hawaii	Tajima.D	-0.8177119469297497
X	2649054	Hawaii	Tajima.D	-0.7409575644617593
X	2649458	Hawaii	Tajima.D	-0.7766942045389442
X	2650346	Hawaii	Tajima.D	-0.7808340734341803
X	2651513	Hawaii	Tajima.D	-0.9286739424334879
X	2651754	Hawaii	Tajima.D	-0.6557045927585772
X	2653021	Hawaii	Tajima.D	-0.5351345727327201
X	2653148	Hawaii	Tajima.D	-0.38296666357219883
X	2653938	Hawaii	Tajima.D	-0.07165702244516463
X	2654470	Hawaii	Tajima.D	-0.011119693255718464
X	2710792	Hawaii	Tajima.D	1.151063683386255
X	2711288	Hawaii	Tajima.D	0.6613472396512972
X	2711507	Hawaii	Tajima.D	0.7755218734733555
X	2711596	Hawaii	Tajima.D	1.519289612845561
X	2711783	Hawaii	Tajima.D	1.510616085818718
X	2712601	Hawaii	Tajima.D	1.6297954582907952
X	2713583	Hawaii	Tajima.D	1.8859557693591305
X	2713944	Hawaii	Tajima.D	1.6836842133103764
X	2714036	Hawaii	Tajima.D	1.892384069414732
X	2715480	Hawaii	Tajima.D	1.8945974100355993
X	2716114	Hawaii	Tajima.D	1.888876223804882
X	2716784	Hawaii	Tajima.D	2.2440834370448695
X	2718141	Hawaii	Tajima.D	2.2666748365220406
X	2718899	Hawaii	Tajima.D	1.9288594769909828
X	2719491	Hawaii	Tajima.D	1.7807069145738958
X	2719817	Hawaii	Tajima.D	1.7213749933880822
X	2720487	Hawaii	Tajima.D	1.4528317596543185
X	2721249	Hawaii	Tajima.D	1.4357561536775727
X	2723092	Hawaii	Tajima.D	0.4147126580506876
X	2724498	Hawaii	Tajima.D	0.05512920908430934
X	2727096	Hawaii	Tajima.D	0.015165871836427388
X	2727701	Hawaii	Tajima.D	-0.46155241933598395
X	2728473	Hawaii	Tajima.D	-0.5888661490743399
X	2728941	Hawaii	Tajima.D	-0.6305686338650904
X	2729539	Hawaii	Tajima.D	-0.575247250799187
X	2731862	Hawaii	Tajima.D	-0.565393472593366
X	2731884	Hawaii	Tajima.D	-0.5561825268802365
X	2732396	Hawaii	Tajima.D	-0.6323957022035841
X	2733600	Hawaii	Tajima.D	-0.29234785495063514
X	2734664	Hawaii	Tajima.D	-0.3761008543894656
X	2735839	Hawaii	Tajima.D	-0.2660233382080103
X	2735978	Hawaii	Tajima.D	-0.2965007885114969
X	2738101	Hawaii	Tajima.D	-0.35808243438593357
X	2739882	Hawaii	Tajima.D	-0.00725075077246367
X	2740544	Hawaii	Tajima.D	-0.02155437409817283
X	2743024	Hawaii	Tajima.D	0.08233858187659726
X	2743380	Hawaii	Tajima.D	-0.32027539675029415
X	2744719	Hawaii	Tajima.D	-0.2981771410103137
X	2745333	Hawaii	Tajima.D	-0.6458586164508454
X	2746059	Hawaii	Tajima.D	-0.7200384518149254
X	2746722	Hawaii	Tajima.D	-0.8015049129514779
X	2747447	Hawaii	Tajima.D	-0.7627654903013982
X	2747764	Hawaii	Tajima.D	-0.8344359633278092
X	2748316	Hawaii	Tajima.D	-0.9850700740234337
X	2748336	Hawaii	Tajima.D	-0.9969126554804473
X	2748768	Hawaii	Tajima.D	-1.2706569517157904
X	2748944	Hawaii	Tajima.D	-1.0781868404017718
X	2749688	Hawaii	Tajima.D	-1.2598820212120727
X	2750934	Hawaii	Tajima.D	-0.8859674557936653
X	2751125	Hawaii	Tajima.D	-0.7617720586456148
X	2751539	Hawaii	Tajima.D	-0.7822194640275858
X	2752039	Hawaii	Tajima.D	-1.2836425406867948
X	2767516	Hawaii	Tajima.D	-1.2174991779014674
X	2767675	Hawaii	Tajima.D	-0.2779646950946416
X	2770017	Hawaii	Tajima.D	-0.7449082057158916
X	2770410	Hawaii	Tajima.D	-1.0098001201852287
X	2771148	Hawaii	Tajima.D	-1.454992599572547
X	2771640	Hawaii	Tajima.D	-1.407182529950816
X	2772164	Hawaii	Tajima.D	-1.5074290168627478
X	2772579	Hawaii	Tajima.D	-1.5219291787370135
X	2773378	Hawaii	Tajima.D	-1.2604147388706235
X	2773636	Hawaii	Tajima.D	-1.1763006757021495
X	2773904	Hawaii	Tajima.D	-0.9133155665489378
X	2774697	Hawaii	Tajima.D	-1.0533418964307908
X	2775336	Hawaii	Tajima.D	-0.9549837799526383
X	2776447	Hawaii	Tajima.D	-0.848023975800293
X	2778037	Hawaii	Tajima.D	-0.6683307863873316
X	2779046	Hawaii	Tajima.D	-0.6893469385201159
X	2780335	Hawaii	Tajima.D	-0.6754874850771939
X	2781832	Hawaii	Tajima.D	-0.5657166887332287
X	2782775	Hawaii	Tajima.D	-0.7701305561344732
X	2783852	Hawaii	Tajima.D	-0.7661467487880451
X	2784058	Hawaii	Tajima.D	-0.8310620233770313
X	2784115	Hawaii	Tajima.D	-0.747997135797602
X	2784783	Hawaii	Tajima.D	-0.8038051948569769
X	2785210	Hawaii	Tajima.D	-0.8553720291666559
X	2785397	Hawaii	Tajima.D	-0.7963682002214056
X	2786203	Hawaii	Tajima.D	-0.6468127008684188
X	2787016	Hawaii	Tajima.D	-0.3168268408842922
X	2787708	Hawaii	Tajima.D	-0.317024867480795
X	2787949	Hawaii	Tajima.D	0.019132352461798903
X	2788327	Hawaii	Tajima.D	0.4922456024672985
X	2818725	Hawaii	Tajima.D	-0.3777321197718364
X	2819021	Hawaii	Tajima.D	0.5085741228396465
X	2819405	Hawaii	Tajima.D	0.0921238918476464
X	2820224	Hawaii	Tajima.D	0.2404277794463916
X	2820629	Hawaii	Tajima.D	0.21001511973709908
X	2821423	Hawaii	Tajima.D	0.15102872798594183
X	2821695	Hawaii	Tajima.D	0.007264489640157174
X	2821919	Hawaii	Tajima.D	-0.033661075254729944
X	2822143	Hawaii	Tajima.D	0.0013219037776981176
X	2822733	Hawaii	Tajima.D	-0.1870338339051561
X	2823113	Hawaii	Tajima.D	-0.091574561248685
X	2823941	Hawaii	Tajima.D	-0.30536837377145076
X	2824595	Hawaii	Tajima.D	-0.4799949144801435
X	2824975	Hawaii	Tajima.D	-0.6070268492294277
X	2825363	Hawaii	Tajima.D	-0.3219592553499265
X	2871649	Hawaii	Tajima.D	-0.5154528917132835
X	2871698	Hawaii	Tajima.D	-0.32055899248513997
X	2872718	Hawaii	Tajima.D	0.19132816878308714
X	2872852	Hawaii	Tajima.D	0.10370856495592193
X	2873497	Hawaii	Tajima.D	0.5205015508741556
X	2873675	Hawaii	Tajima.D	0.5360738315421613
X	2874100	Hawaii	Tajima.D	-0.30934673212322955
X	2931432	Hawaii	Tajima.D	-0.5824408806920687
X	2932195	Hawaii	Tajima.D	-0.5741577457408357
X	2932424	Hawaii	Tajima.D	-0.4901584386207926
X	2932457	Hawaii	Tajima.D	-0.5780364026868563
X	2933288	Hawaii	Tajima.D	-0.627296109729148
X	2933288	Hawaii	Tajima.D	-0.6774128706753799
X	2933483	Hawaii	Tajima.D	-0.7654525125413472
X	2934169	Hawaii	Tajima.D	-0.7783821080111013
X	2935275	Hawaii	Tajima.D	-0.779186597287916
X	2935321	Hawaii	Tajima.D	-0.7634868146621844
X	2935780	Hawaii	Tajima.D	-0.7534406865501997
X	2936001	Hawaii	Tajima.D	-0.7885945961765622
X	2937684	Hawaii	Tajima.D	-0.8790342073445151
X	2937800	Hawaii	Tajima.D	-0.8402454253199092
X	2938660	Hawaii	Tajima.D	-0.8817163460432988
X	2938824	Hawaii	Tajima.D	-0.8028747097539407
X	2938858	Hawaii	Tajima.D	-0.6113035647570103
X	2939736	Hawaii	Tajima.D	-0.41996404803587206
X	2940061	Hawaii	Tajima.D	0.053258374734792086
X	3008722	Hawaii	Tajima.D	-1.1632459854829
X	3009461	Hawaii	Tajima.D	-0.5309751249643401
X	3009597	Hawaii	Tajima.D	-0.7808192960104522
X	3010619	Hawaii	Tajima.D	-0.6986020794501061
X	3010874	Hawaii	Tajima.D	-0.9196273789524925
X	3011137	Hawaii	Tajima.D	-1.1105384317809177
X	3012023	Hawaii	Tajima.D	-0.8495944450537779
X	3012695	Hawaii	Tajima.D	-0.8120874766093498
X	3013569	Hawaii	Tajima.D	-0.9584722193999116
X	3014029	Hawaii	Tajima.D	-0.9013060305676326
X	3014770	Hawaii	Tajima.D	-1.1609185206455264
X	3015066	Hawaii	Tajima.D	-1.0483181739878176
X	3015700	Hawaii	Tajima.D	-1.1381466526845565
X	3016436	Hawaii	Tajima.D	-0.96081404367326
X	3018591	Hawaii	Tajima.D	-0.9203234098754441
X	3019528	Hawaii	Tajima.D	-1.1999440803193628
X	3019783	Hawaii	Tajima.D	-1.2992413855737988
X	3022449	Hawaii	Tajima.D	-1.1770160301900021
X	3022859	Hawaii	Tajima.D	-1.1424202077164083
X	3023152	Hawaii	Tajima.D	-1.1337018906982934
X	3024201	Hawaii	Tajima.D	-0.8952226060391443
X	3024601	Hawaii	Tajima.D	-1.0356274265530139
X	3027393	Hawaii	Tajima.D	-1.1743407030939657
X	3028223	Hawaii	Tajima.D	-1.3770219344767576
X	3028983	Hawaii	Tajima.D	-1.1358251887475157
X	3030679	Hawaii	Tajima.D	-1.2697955462634458
X	3031751	Hawaii	Tajima.D	-1.210155350488327
X	3033832	Hawaii	Tajima.D	-1.0035455000406923
X	3034314	Hawaii	Tajima.D	-1.0800307688650657
X	3035488	Hawaii	Tajima.D	-0.9961802708517787
X	3035779	Hawaii	Tajima.D	-1.0256089021892183
X	3036355	Hawaii	Tajima.D	-1.0165608425963952
X	3036423	Hawaii	Tajima.D	-0.9025115398277666
X	3036640	Hawaii	Tajima.D	-0.8562737433193378
X	3036743	Hawaii	Tajima.D	-0.962786746192994
X	3037847	Hawaii	Tajima.D	-0.7200021310798023
X	3038300	Hawaii	Tajima.D	-0.7334533079614282
X	3039064	Hawaii	Tajima.D	-0.7027609006113567
X	3039974	Hawaii	Tajima.D	-0.5464199971953468
X	3040345	Hawaii	Tajima.D	-0.5976891258757048
X	3040472	Hawaii	Tajima.D	-0.32235410226290107
X	3046605	Hawaii	Tajima.D	0.6517916432333072
X	3078561	Hawaii	Tajima.D	-0.3619788220519864
X	3079085	Hawaii	Tajima.D	-0.578621969635866
X	3079450	Hawaii	Tajima.D	-1.2310980267032567
X	3080537	Hawaii	Tajima.D	-1.293629092807833
X	3080849	Hawaii	Tajima.D	-1.3400886471871292
X	3081045	Hawaii	Tajima.D	-1.1886963864002733
X	3081413	Hawaii	Tajima.D	-1.1216127402092884
X	3081532	Hawaii	Tajima.D	-1.1886514442515248
X	3082095	Hawaii	Tajima.D	-1.1223073221370374
X	3082910	Hawaii	Tajima.D	-0.9894122340549093
X	3083486	Hawaii	Tajima.D	-1.0365242555966052
X	3084985	Hawaii	Tajima.D	-1.062065160490622
X	3085702	Hawaii	Tajima.D	-0.970634883106988
X	3087299	Hawaii	Tajima.D	-1.0283690612751053
X	3087841	Hawaii	Tajima.D	-0.8709875578679716
X	3089437	Hawaii	Tajima.D	-0.8282903177093613
X	3089886	Hawaii	Tajima.D	-0.8831207986483349
X	3090487	Hawaii	Tajima.D	-0.7895658372729359
X	3090793	Hawaii	Tajima.D	-0.835033666494488
X	3091561	Hawaii	Tajima.D	-0.97655075351919
X	3091920	Hawaii	Tajima.D	-0.9271268319764527
X	3092234	Hawaii	Tajima.D	-0.8838960807043856
X	3092909	Hawaii	Tajima.D	-0.7106121144760708
X	3093415	Hawaii	Tajima.D	-0.22943395242323888
X	3093616	Hawaii	Tajima.D	-0.35028649351648944
X	3094177	Hawaii	Tajima.D	-0.9096464376190495
X	3158650	Hawaii	Tajima.D	-1.302718466226895
X	3158944	Hawaii	Tajima.D	-0.6917825968228947
X	3159215	Hawaii	Tajima.D	-0.551738017320332
X	3159346	Hawaii	Tajima.D	-0.8151479413707419
X	3160624	Hawaii	Tajima.D	-0.9027425948264909
X	3161445	Hawaii	Tajima.D	-1.0651533843843992
X	3161695	Hawaii	Tajima.D	-1.119985191519392
X	3162098	Hawaii	Tajima.D	-1.032196834349569
X	3162616	Hawaii	Tajima.D	-1.1344352157952076
X	3162838	Hawaii	Tajima.D	-1.2037940227452752
X	3163717	Hawaii	Tajima.D	-1.020768776065931
X	3164867	Hawaii	Tajima.D	-1.0663251703569216
X	3166332	Hawaii	Tajima.D	-0.9124106821673694
X	3166830	Hawaii	Tajima.D	-0.84906411599981
X	3167814	Hawaii	Tajima.D	-0.7490228926010422
X	3169064	Hawaii	Tajima.D	-0.6682105482727089
X	3169668	Hawaii	Tajima.D	-0.6468832961567179
X	3170514	Hawaii	Tajima.D	-0.46003638035220623
X	3171102	Hawaii	Tajima.D	-0.1976929961640198
X	3172097	Hawaii	Tajima.D	-0.148305989451131
X	3172690	Hawaii	Tajima.D	-0.19128298460114904
X	3174572	Hawaii	Tajima.D	-0.4497799861395781
X	3175827	Hawaii	Tajima.D	-0.8069913652279043
X	3177504	Hawaii	Tajima.D	-0.9005663066998865
X	3178321	Hawaii	Tajima.D	-0.9427150214019471
X	3179769	Hawaii	Tajima.D	-1.1143390526143602
X	3180466	Hawaii	Tajima.D	-0.8573972488499176
X	3181930	Hawaii	Tajima.D	-1.119524229052918
X	3182693	Hawaii	Tajima.D	-1.2093135617178854
X	3183163	Hawaii	Tajima.D	-1.1969252432240194
X	3183739	Hawaii	Tajima.D	-1.2499215984449459
X	3184709	Hawaii	Tajima.D	-1.1144244267139158
X	3186255	Hawaii	Tajima.D	-0.9811466861295891
X	3186904	Hawaii	Tajima.D	-0.9241946985942198
X	3188464	Hawaii	Tajima.D	-0.9012289476308639
X	3189342	Hawaii	Tajima.D	-0.6873064916508289
X	3190121	Hawaii	Tajima.D	-0.7078190446495385
X	3190541	Hawaii	Tajima.D	-0.6398212445641259
X	3191669	Hawaii	Tajima.D	-0.5694122019430226
X	3192021	Hawaii	Tajima.D	-0.6091359474948843
X	3193626	Hawaii	Tajima.D	-0.5548539406798235
X	3194235	Hawaii	Tajima.D	-0.47285181314006924
X	3195454	Hawaii	Tajima.D	-0.5481181209497853
X	3197861	Hawaii	Tajima.D	-0.5111033317064182
X	3198612	Hawaii	Tajima.D	-0.4314878864010836
X	3199845	Hawaii	Tajima.D	-0.41053590616058877
X	3200433	Hawaii	Tajima.D	-0.4585856187750571
X	3201520	Hawaii	Tajima.D	-0.44836145639769315
X	3201787	Hawaii	Tajima.D	-0.3034092365075261
X	3202941	Hawaii	Tajima.D	-0.24872377382400937
X	3203823	Hawaii	Tajima.D	-0.14638234056370344
X	3205192	Hawaii	Tajima.D	0.004203354536310014
X	3205776	Hawaii	Tajima.D	0.14021371708529878
X	3206999	Hawaii	Tajima.D	0.24711286500725205
X	3207622	Hawaii	Tajima.D	0.1627876878543742
X	3208712	Hawaii	Tajima.D	0.10827590220515225
X	3208833	Hawaii	Tajima.D	0.056684947331945235
X	3209861	Hawaii	Tajima.D	0.0788526395790366
X	3210096	Hawaii	Tajima.D	0.01631621944020649
X	3210715	Hawaii	Tajima.D	0.05344591484722175
X	3210891	Hawaii	Tajima.D	0.007619477469438447
X	3211859	Hawaii	Tajima.D	-0.32867953797520577
X	3212658	Hawaii	Tajima.D	-0.4160566840989113
X	3213837	Hawaii	Tajima.D	-0.3924222178118357
X	3221610	Hawaii	Tajima.D	-0.5107543131421001
X	3221960	Hawaii	Tajima.D	-0.545902050320467
X	3222043	Hawaii	Tajima.D	-0.7349396069834024
X	3222934	Hawaii	Tajima.D	-0.7533995456362913
X	3223636	Hawaii	Tajima.D	-0.5311260293427801
X	3224742	Hawaii	Tajima.D	-0.8424319000404582
X	3225226	Hawaii	Tajima.D	-0.7812704856184252
X	3225438	Hawaii	Tajima.D	-0.8201751215934704
X	3226057	Hawaii	Tajima.D	-0.8248878642916928
X	3227064	Hawaii	Tajima.D	-1.107036785204305
X	3227595	Hawaii	Tajima.D	-1.1173653114246507
X	3228175	Hawaii	Tajima.D	-1.09257811853318
X	3230057	Hawaii	Tajima.D	-0.9306372219207762
X	3231290	Hawaii	Tajima.D	-0.9380666111143077
X	3233138	Hawaii	Tajima.D	-0.6102207117914342
X	3234017	Hawaii	Tajima.D	-0.2228234030243869
X	3234561	Hawaii	Tajima.D	-0.12186532504567722
X	3235330	Hawaii	Tajima.D	-0.2031204647489397
X	3235891	Hawaii	Tajima.D	-0.060345453809416874
X	3236663	Hawaii	Tajima.D	0.18550512860882185
X	3237118	Hawaii	Tajima.D	0.16859697922792463
X	3237856	Hawaii	Tajima.D	0.46198784759910977
X	3239481	Hawaii	Tajima.D	0.6763668100664018
X	3241050	Hawaii	Tajima.D	0.6844213132529507
X	3241869	Hawaii	Tajima.D	0.4100306386737218
X	3243576	Hawaii	Tajima.D	0.13342427935551052
X	3243847	Hawaii	Tajima.D	0.02496847976473146
X	3244968	Hawaii	Tajima.D	0.1924155253426051
X	3245822	Hawaii	Tajima.D	-0.14876967255745974
X	3247414	Hawaii	Tajima.D	-0.11586763767446726
X	3248514	Hawaii	Tajima.D	0.03142854604620856
X	3249453	Hawaii	Tajima.D	-0.14494146753301038
X	3250036	Hawaii	Tajima.D	-0.1966978623933087
X	3250729	Hawaii	Tajima.D	-0.3097160026429385
X	3251330	Hawaii	Tajima.D	-0.15572084807261535
X	3252639	Hawaii	Tajima.D	0.10526277557855802
X	3252727	Hawaii	Tajima.D	0.14946724603856837
X	3254286	Hawaii	Tajima.D	0.05715788329790674
X	3255340	Hawaii	Tajima.D	0.36530223658313504
X	3256302	Hawaii	Tajima.D	0.26516572190618076
X	3257060	Hawaii	Tajima.D	0.00926976186192067
X	3257552	Hawaii	Tajima.D	0.054981728713916093
X	3260142	Hawaii	Tajima.D	-0.05905697653840297
X	3261066	Hawaii	Tajima.D	0.029686479551978118
X	3263386	Hawaii	Tajima.D	-0.2665472937158278
X	3263740	Hawaii	Tajima.D	-0.4471764781329421
X	3264570	Hawaii	Tajima.D	-0.5842929736063569
X	3265235	Hawaii	Tajima.D	-0.588010181429613
X	3266998	Hawaii	Tajima.D	-1.0114463519727723
X	3268572	Hawaii	Tajima.D	-1.1719977951078147
X	3270097	Hawaii	Tajima.D	-1.3413408828279243
X	3271205	Hawaii	Tajima.D	-1.5644924142990169
X	3271875	Hawaii	Tajima.D	-1.6928551570344537
X	3272395	Hawaii	Tajima.D	-1.5836392023562118
X	3272749	Hawaii	Tajima.D	-1.6755806018971648
X	3272982	Hawaii	Tajima.D	-1.711434824642861
X	3273313	Hawaii	Tajima.D	-1.7357371556571386
X	3273562	Hawaii	Tajima.D	-1.7673702452367255
X	3274477	Hawaii	Tajima.D	-1.7051941320169661
X	3275067	Hawaii	Tajima.D	-1.6522503847289718
X	3276179	Hawaii	Tajima.D	-1.547357147005143
X	3278378	Hawaii	Tajima.D	-1.405535804884267
X	3280135	Hawaii	Tajima.D	-1.1098313606252763
X	3280994	Hawaii	Tajima.D	-1.2208173545788454
X	3281749	Hawaii	Tajima.D	-1.1481937034066916
X	3282112	Hawaii	Tajima.D	-1.1039954188692567
X	3282270	Hawaii	Tajima.D	-1.0951144508795407
X	3283453	Hawaii	Tajima.D	-0.9036202421260483
X	3284410	Hawaii	Tajima.D	-0.7365087732273257
X	3284566	Hawaii	Tajima.D	-0.6287100179063428
X	3285183	Hawaii	Tajima.D	-0.392226890471024
X	3285454	Hawaii	Tajima.D	-0.3969104064432082
X	3286169	Hawaii	Tajima.D	-0.4448299654977101
X	3290919	Hawaii	Tajima.D	0.06427003139492617
X	3296588	Hawaii	Tajima.D	1.0390087602971898
X	3296843	Hawaii	Tajima.D	1.1211116391229659
X	3297308	Hawaii	Tajima.D	0.8346682558837529
X	3297379	Hawaii	Tajima.D	0.6658674042101174
X	3297702	Hawaii	Tajima.D	0.659073736539685
X	3298164	Hawaii	Tajima.D	0.7154764151184487
X	3299161	Hawaii	Tajima.D	0.7302527865900915
X	3300599	Hawaii	Tajima.D	0.8858407497783841
X	3301323	Hawaii	Tajima.D	1.0585018489093134
X	3301906	Hawaii	Tajima.D	0.973150997795013
X	3303004	Hawaii	Tajima.D	0.9740219688997896
X	3303563	Hawaii	Tajima.D	1.0787660295936572
X	3304049	Hawaii	Tajima.D	1.086247805020503
X	3304683	Hawaii	Tajima.D	0.9905560722246137
X	3306909	Hawaii	Tajima.D	0.96996731183888385
X	3307421	Hawaii	Tajima.D	0.9958122984650868
X	3309220	Hawaii	Tajima.D	0.7949523336009384
X	3309612	Hawaii	Tajima.D	0.5036659934288129
X	3310172	Hawaii	Tajima.D	0.5397984072309069
X	3310273	Hawaii	Tajima.D	0.41255522288916724
X	3310680	Hawaii	Tajima.D	0.31610357540313105
X	3311973	Hawaii	Tajima.D	0.1560405354968156
X	3318174	Hawaii	Tajima.D	0.12274683891546433
X	3319316	Hawaii	Tajima.D	-0.04031582504132665
X	3320040	Hawaii	Tajima.D	-0.3880345917297624
X	3321082	Hawaii	Tajima.D	-0.2102281119403002
X	3321763	Hawaii	Tajima.D	-0.16258336277146493
X	3321791	Hawaii	Tajima.D	-0.2804901308093458
X	3322244	Hawaii	Tajima.D	-0.3220906807278418
X	3323046	Hawaii	Tajima.D	-0.3079872391004512
X	3323328	Hawaii	Tajima.D	-0.31629814675251977
[truncated: 134,786 more rows]
