# Supplementary material for: Deep sampling of Hawaiian Caenorhabditis elegans reveals high genetic diversity and admixture with global populations
Source: eLife journal article supplement (doi:10.7554/elife.50465), 2019-12-03
Supplement: supp [file elife-50465-supp-v1.zip › elife_poa_e50465_Figure_5_figure_supplement_1_source_data_2.csv]

A	B	C	D	E	F	G	H	I	J	K	L	M	N	O	samples	K_value
1e-5	1e-5	1e-5	1e-5	1e-5	1e-5	0.99986	1e-5	1e-5	1e-5	1e-5	1e-5	1e-5	1e-5	1e-5	AB1	15
1e-5	1e-5	1e-5	1e-5	1e-5	1e-5	1e-5	1e-5	1e-5	1e-5	0.99986	1e-5	1e-5	1e-5	1e-5	BRC20067	15
0.014401	1e-5	1e-5	1e-5	1e-5	0.058455	1e-5	1e-5	1e-5	1e-5	0.505653	0.421381	1e-5	1e-5	1e-5	BRC20263	15
1e-5	1e-5	0.99986	1e-5	1e-5	1e-5	1e-5	1e-5	1e-5	1e-5	1e-5	1e-5	1e-5	1e-5	1e-5	CB4851	15
1e-5	1e-5	1e-5	1e-5	1e-5	1e-5	0.99986	1e-5	1e-5	1e-5	1e-5	1e-5	1e-5	1e-5	1e-5	CB4852	15
1e-5	1e-5	1e-5	1e-5	1e-5	1e-5	1e-5	1e-5	0.605872	1e-5	0.393997	1e-5	1e-5	1e-5	1e-5	CB4853	15
1e-5	1e-5	1e-5	1e-5	1e-5	1e-5	0.132084	1e-5	1e-5	0.397442	0.470354	1e-5	1e-5	1e-5	1e-5	CB4854	15
1e-5	1e-5	1e-5	1e-5	1e-5	1e-5	1e-5	1e-5	0.741114	1e-5	0.258756	1e-5	1e-5	1e-5	1e-5	CB4855	15
1e-5	0.901812	1e-5	1e-5	1e-5	1e-5	1e-5	1e-5	1e-5	0.098058	1e-5	1e-5	1e-5	1e-5	1e-5	CB4856	15
1e-5	1e-5	1e-5	1e-5	1e-5	1e-5	1e-5	1e-5	0.951762	1e-5	0.048108	1e-5	1e-5	1e-5	1e-5	CB4857	15
1.4e-5	1e-5	1e-5	1e-5	1e-5	1e-5	1e-5	1e-5	0.938467	1e-5	0.061398	1e-5	1e-5	1e-5	1e-5	CB4858	15
1e-5	1e-5	0.455057	1e-5	1.5e-5	1e-5	0.116887	1e-5	1e-5	1e-5	1e-5	1e-5	1e-5	0.427931	1e-5	CB4932	15
1e-5	1e-5	1e-5	1e-5	1e-5	1e-5	1e-5	0.193034	0.636645	0.03714	1e-5	0.133071	1e-5	1e-5	1e-5	CX11254	15
1e-5	1e-5	1e-5	1e-5	1e-5	1e-5	1e-5	1e-5	0.999856	1e-5	1.4e-5	1e-5	1e-5	1e-5	1e-5	CX11262	15
1e-5	1e-5	1e-5	1e-5	1e-5	1e-5	1e-5	1e-5	0.99986	1e-5	1e-5	1e-5	1e-5	1e-5	1e-5	CX11264	15
1e-5	1e-5	1e-5	1e-5	1e-5	1e-5	1e-5	0.204085	0.238201	1e-5	0.202229	0.355374	1e-5	1e-5	1e-5	CX11271	15
1e-5	1e-5	0.0333	1e-5	1e-5	1e-5	1e-5	0.115265	0.542751	1e-5	0.099272	0.209312	1e-5	1e-5	1e-5	CX11276	15
1e-5	1e-5	1e-5	1e-5	1e-5	1e-5	1e-5	1e-5	0.667435	1e-5	0.009355	0.32309	1e-5	1e-5	1e-5	CX11285	15
1e-5	1e-5	1e-5	1e-5	1e-5	1e-5	1e-5	1e-5	0.647649	1e-5	0.352221	1e-5	1e-5	1e-5	1e-5	CX11292	15
1e-5	1e-5	1e-5	1e-5	1e-5	1e-5	1e-5	0.179572	0.563998	1e-5	0.109381	0.146939	1e-5	1e-5	1e-5	CX11307	15
1e-5	1e-5	1e-5	1e-5	1e-5	1e-5	1e-5	1e-5	0.99986	1e-5	1e-5	1e-5	1e-5	1e-5	1e-5	CX11314	15
1e-5	1e-5	1e-5	1e-5	1e-5	1e-5	1e-5	1e-5	0.827042	1e-5	0.172828	1e-5	1e-5	1e-5	1e-5	CX11315	15
1e-5	1e-5	1e-5	1e-5	1e-5	1e-5	1e-5	0.130118	1e-5	1e-5	0.045996	1e-5	1e-5	0.823765	1e-5	DL200	15
1e-5	1e-5	1e-5	1e-5	1e-5	1e-5	0.164779	1e-5	0.687366	1e-5	0.083728	0.064017	1e-5	1e-5	1e-5	DL226	15
0.083806	0.916064	1e-5	1e-5	1e-5	1e-5	1e-5	1e-5	1e-5	1e-5	1e-5	1e-5	1e-5	1e-5	1e-5	DL238	15
1e-5	0.490065	1e-5	1e-5	1e-5	0.216426	1e-5	1e-5	0.255146	1e-5	1e-5	0.038253	1e-5	1e-5	1e-5	ECA189	15
1e-5	1e-5	1e-5	1e-5	1e-5	1e-5	1e-5	1e-5	1e-5	1e-5	1e-5	1e-5	1e-5	1e-5	0.99986	ECA191	15
1e-5	1e-5	0.99986	1e-5	1e-5	1e-5	1e-5	1e-5	1e-5	1e-5	1e-5	1e-5	1e-5	1e-5	1e-5	ECA252	15
1e-5	1e-5	1e-5	2e-5	1e-5	1.5e-5	1e-5	1e-5	1e-5	1e-5	1e-5	1e-5	0.999844	1e-5	1e-5	ECA347	15
1e-5	1e-5	1e-5	1e-5	1e-5	1e-5	1e-5	1e-5	0.99986	1e-5	1e-5	1e-5	1e-5	1e-5	1e-5	ECA348	15
1e-5	1e-5	1e-5	1e-5	1e-5	1e-5	1e-5	1e-5	0.99986	1e-5	1e-5	1e-5	1e-5	1e-5	1e-5	ECA349	15
1e-5	1e-5	1e-5	1e-5	1e-5	1e-5	1e-5	1e-5	1e-5	1e-5	1e-5	1e-5	0.99986	1e-5	1e-5	ECA36	15
1e-5	1e-5	1e-5	1e-5	1e-5	1e-5	1e-5	1e-5	1e-5	1e-5	1e-5	1e-5	0.99986	1e-5	1e-5	ECA363	15
0.070662	0.799039	1e-5	1e-5	1e-5	1e-5	1e-5	1e-5	1e-5	1e-5	1e-5	1e-5	0.13018	1e-5	1e-5	ECA369	15
1e-5	0.574097	1e-5	1e-5	1e-5	0.094474	1e-5	1e-5	0.267657	1e-5	1e-5	0.063662	1e-5	1e-5	1e-5	ECA372	15
1e-5	1e-5	1e-5	1e-5	1e-5	1e-5	1e-5	1e-5	1e-5	1e-5	1e-5	1e-5	1e-5	1e-5	0.99986	ECA396	15
1e-5	0.160881	1e-5	0.08065	1e-5	1e-5	1e-5	1e-5	1e-5	1e-5	1e-5	1e-5	0.591945	1e-5	0.166414	ECA701	15
1e-5	0.893902	1e-5	1e-5	1e-5	1e-5	1e-5	1e-5	1e-5	1e-5	1e-5	1e-5	1e-5	1e-5	0.105968	ECA703	15
1e-5	0.853866	1e-5	1e-5	1e-5	1e-5	1e-5	1e-5	0.146004	1e-5	1e-5	1e-5	1e-5	1e-5	1e-5	ECA705	15
1e-5	0.99986	1e-5	1e-5	1e-5	1e-5	1e-5	1e-5	1e-5	1e-5	1e-5	1e-5	1e-5	1e-5	1e-5	ECA706	15
1e-5	0.641906	1e-5	1e-5	1e-5	0.2026	1.3e-5	1e-5	0.155369	1e-5	1.3e-5	1e-5	1e-5	1e-5	1e-5	ECA710	15
1e-5	1e-5	1e-5	1e-5	1e-5	0.999858	1e-5	1e-5	1e-5	1e-5	1.2e-5	1e-5	1e-5	1e-5	1e-5	ECA712	15
1e-5	1e-5	1e-5	1e-5	1e-5	1.4e-5	1e-5	1.7e-5	1e-5	1e-5	1e-5	1e-5	1e-5	1e-5	0.999849	ECA722	15
1e-5	1e-5	1.5e-5	1.5e-5	1e-5	1e-5	1.4e-5	1e-5	1e-5	1e-5	1e-5	1e-5	1.2e-5	1e-5	0.999843	ECA723	15
1e-5	1e-5	1e-5	1e-5	1e-5	1e-5	1e-5	1e-5	0.007658	1e-5	1e-5	1e-5	0.992212	1e-5	1e-5	ECA724	15
1e-5	1e-5	1e-5	1e-5	1e-5	1e-5	1e-5	1e-5	1e-5	1e-5	1e-5	1e-5	1e-5	1e-5	0.99986	ECA730	15
1e-5	0.99986	1e-5	1e-5	1e-5	1e-5	1e-5	1e-5	1e-5	1e-5	1e-5	1e-5	1e-5	1e-5	1e-5	ECA732	15
1e-5	0.99986	1e-5	1e-5	1e-5	1e-5	1e-5	1e-5	1e-5	1e-5	1e-5	1e-5	1e-5	1e-5	1e-5	ECA733	15
1e-5	0.495967	1e-5	1e-5	1e-5	0.134618	1e-5	1e-5	0.369295	1e-5	1e-5	1e-5	1e-5	1e-5	1e-5	ECA738	15
1e-5	1e-5	1e-5	1.4e-5	1e-5	1.5e-5	1e-5	1e-5	1e-5	1e-5	1e-5	1e-5	0.999851	1e-5	1e-5	ECA740	15
1e-5	1e-5	1e-5	1e-5	1e-5	1e-5	1e-5	1e-5	1e-5	1e-5	1e-5	1e-5	0.99986	1e-5	1e-5	ECA741	15
1e-5	1.7e-5	1e-5	1e-5	1e-5	1e-5	1e-5	1.5e-5	1e-5	1e-5	1e-5	1e-5	0.999848	1e-5	1e-5	ECA742	15
1e-5	0.88938	0.020408	1e-5	1e-5	1e-5	1e-5	1e-5	0.035656	1e-5	0.054213	2.43e-4	1e-5	1e-5	1e-5	ECA743	15
1e-5	1e-5	1e-5	1e-5	1e-5	1e-5	1e-5	1e-5	1e-5	1e-5	1e-5	1e-5	1e-5	1e-5	0.99986	ECA744	15
1e-5	1.2e-5	1e-5	1e-5	1e-5	1.2e-5	1e-5	1e-5	1e-5	1.1e-5	1e-5	1e-5	1e-5	1e-5	0.999855	ECA745	15
1e-5	1e-5	1e-5	1e-5	1e-5	1e-5	1e-5	1e-5	1e-5	1e-5	1e-5	1e-5	1e-5	1e-5	0.99986	ECA746	15
1e-5	1e-5	1.1e-5	1e-5	1e-5	0.999859	1e-5	1e-5	1e-5	1e-5	1e-5	1e-5	1e-5	1e-5	1e-5	ECA760	15
1e-5	1e-5	1.8e-5	1e-5	1e-5	0.999846	1e-5	1.1e-5	1e-5	1.3e-5	1e-5	1.2e-5	1e-5	1e-5	1e-5	ECA768	15
1e-5	1e-5	1e-5	1e-5	1e-5	0.99986	1e-5	1e-5	1e-5	1e-5	1e-5	1e-5	1e-5	1e-5	1e-5	ECA777	15
1e-5	1e-5	1.7e-5	1e-5	1.8e-5	0.999845	1e-5	1e-5	1e-5	1e-5	1e-5	1e-5	1e-5	1e-5	1e-5	ECA778	15
1e-5	1e-5	1e-5	1e-5	1e-5	0.999854	1.6e-5	1e-5	1e-5	1e-5	1e-5	1e-5	1e-5	1e-5	1e-5	ECA807	15
1.7e-5	1e-5	1e-5	1e-5	1e-5	0.999842	1e-5	1e-5	1.4e-5	1.7e-5	1e-5	1.1e-5	1e-5	1e-5	1e-5	ECA812	15
1e-5	1e-5	1e-5	1e-5	0.523572	1e-5	1e-5	1e-5	0.222828	1e-5	0.25348	1e-5	1e-5	1e-5	1e-5	ED3005	15
1e-5	1e-5	1e-5	1e-5	0.226225	1e-5	1e-5	1e-5	0.223396	1e-5	0.435343	0.114927	1e-5	1e-5	1e-5	ED3011	15
1e-5	1e-5	0.498233	1e-5	1e-5	1e-5	0.501637	1e-5	1e-5	1e-5	1e-5	1e-5	1e-5	1e-5	1e-5	ED3012	15
1e-5	1e-5	1e-5	1e-5	1e-5	1e-5	0.323358	0.116418	1e-5	1e-5	0.124442	1e-5	1e-5	0.435672	1e-5	ED3017	15
1e-5	1e-5	1e-5	1e-5	1e-5	1e-5	1e-5	0.134701	1e-5	0.212104	0.296481	0.356604	1e-5	1e-5	1e-5	ED3040	15
1e-5	1e-5	1e-5	1e-5	1e-5	1e-5	1e-5	0.470968	1e-5	1e-5	0.244092	0.172052	1e-5	0.112778	1e-5	ED3046	15
1e-5	1e-5	1e-5	1e-5	1e-5	1e-5	1e-5	1e-5	1e-5	0.165173	0.834697	1e-5	1e-5	1e-5	1e-5	ED3048	15
1e-5	1e-5	1e-5	1e-5	1e-5	1e-5	1e-5	0.488385	1e-5	1e-5	0.239228	0.164671	1e-5	0.107607	1e-5	ED3049	15
1e-5	1e-5	1e-5	1e-5	1e-5	1e-5	1e-5	1e-5	1e-5	0.257216	0.35970800000000003	0.382956	1e-5	1e-5	1e-5	ED3052	15
1e-5	1e-5	1e-5	1e-5	1e-5	1e-5	1e-5	0.138725	1e-5	1e-5	0.861145	1e-5	1e-5	1e-5	1e-5	ED3073	15
0.039589	1e-5	1e-5	1e-5	1e-5	1e-5	1e-5	1e-5	1e-5	0.149242	0.811049	1e-5	1e-5	1e-5	1e-5	ED3077	15
1e-5	1e-5	1e-5	1e-5	1e-5	1e-5	0.859899	1e-5	1e-5	1e-5	0.139971	1e-5	1e-5	1e-5	1e-5	EG4347	15
1e-5	1e-5	1e-5	1e-5	1e-5	1e-5	1e-5	0.99986	1e-5	1e-5	1e-5	1e-5	1e-5	1e-5	1e-5	EG4349	15
1e-5	1e-5	1e-5	1e-5	1e-5	1e-5	0.110177	0.287287	1e-5	0.602416	1e-5	1e-5	1e-5	1e-5	1e-5	EG4724	15
1e-5	1e-5	1e-5	0.179615	1e-5	1e-5	1e-5	0.050328	1e-5	0.549686	0.119345	0.100927	1e-5	1e-5	1e-5	EG4725	15
1e-5	1e-5	1e-5	1e-5	1e-5	1e-5	0.376079	1e-5	0.453948	1e-5	0.169848	1e-5	1e-5	1.5e-5	1e-5	EG4946	15
1e-5	1e-5	1e-5	1e-5	1e-5	1e-5	1e-5	1e-5	1e-5	1e-5	0.99986	1e-5	1e-5	1e-5	1e-5	GXW1	15
1e-5	1e-5	1e-5	1e-5	1e-5	1e-5	0.672104	0.17961	1e-5	1e-5	1e-5	0.090163	1e-5	0.058013	1e-5	JT11398	15
1e-5	1e-5	1e-5	1e-5	1e-5	1e-5	1e-5	1e-5	1e-5	0.089209	0.910661	1e-5	1e-5	1e-5	1e-5	JU1088	15
1e-5	1e-5	1e-5	1e-5	1e-5	1e-5	1e-5	1e-5	0.692319	1e-5	0.307551	1e-5	1e-5	1e-5	1e-5	JU1172	15
1e-5	1e-5	0.61409	1e-5	1e-5	1e-5	0.38578	1e-5	1e-5	1e-5	1e-5	1e-5	1e-5	1e-5	1e-5	JU1200	15
0.370933	1e-5	0.628934	1e-5	1.3e-5	1e-5	1e-5	1e-5	1e-5	1e-5	1e-5	1e-5	1e-5	1e-5	1e-5	JU1212	15
0.442766	1e-5	1e-5	1e-5	1e-5	1e-5	1e-5	1e-5	1e-5	1e-5	1e-5	1e-5	1e-5	0.557104	1e-5	JU1213	15
1e-5	1e-5	1e-5	1e-5	1e-5	1e-5	1e-5	1e-5	1e-5	1e-5	1e-5	1e-5	1e-5	0.99986	1e-5	JU1242	15
0.759708	1e-5	0.240162	1e-5	1e-5	1e-5	1e-5	1e-5	1e-5	1e-5	1e-5	1e-5	1e-5	1e-5	1e-5	JU1246	15
1e-5	1e-5	0.99986	1e-5	1e-5	1e-5	1e-5	1e-5	1e-5	1e-5	1e-5	1e-5	1e-5	1e-5	1e-5	JU1249	15
1e-5	1e-5	1e-5	1e-5	1e-5	1e-5	0.99986	1e-5	1e-5	1e-5	1e-5	1e-5	1e-5	1e-5	1e-5	JU1395	15
1e-5	1e-5	1e-5	0.022538	1e-5	1e-5	1e-5	0.491174	1e-5	1e-5	1e-5	0.166269	1e-5	0.319909	1e-5	JU1400	15
1e-5	1e-5	0.032173	1e-5	1e-5	1e-5	1e-5	0.579406	1e-5	1e-5	0.185198	0.203113	1e-5	1e-5	1e-5	JU1409	15
1e-5	1e-5	2.42e-4	1e-5	1e-5	1e-5	0.367515	0.56942	1e-5	1e-5	1e-5	0.062713	1e-5	1e-5	1e-5	JU1440	15
0.099651	1.1e-5	1e-5	1e-5	1e-5	1e-5	1e-5	1e-5	1e-5	1e-5	1e-5	0.826622	1e-5	0.073606	1e-5	JU1491	15
1e-5	1e-5	1e-5	1e-5	1e-5	1e-5	1e-5	0.499973	1e-5	1e-5	1e-5	1e-5	1e-5	0.499897	1e-5	JU1530	15
1e-5	1e-5	0.280971	1e-5	1e-5	1e-5	0.718899	1e-5	1e-5	1e-5	1e-5	1e-5	1e-5	1e-5	1e-5	JU1543	15
1e-5	1e-5	0.99986	1e-5	1e-5	1e-5	1e-5	1e-5	1e-5	1e-5	1e-5	1e-5	1e-5	1e-5	1e-5	JU1568	15
0.999857	1e-5	1e-5	1e-5	1e-5	1e-5	1e-5	1e-5	1e-5	1e-5	1e-5	1e-5	1.3e-5	1e-5	1e-5	JU1580	15
0.589396	1e-5	1e-5	1e-5	1e-5	1e-5	0.311773	1e-5	1e-5	1e-5	1e-5	1e-5	1e-5	0.098711	1e-5	JU1581	15
1e-5	1e-5	0.816275	1e-5	1e-5	1e-5	0.068012	1e-5	1e-5	1e-5	0.115593	1e-5	1e-5	1e-5	1e-5	JU1586	15
1e-5	1e-5	1e-5	1e-5	1e-5	1e-5	0.61802	0.16895	1e-5	1e-5	0.099795	0.113125	1e-5	1e-5	1e-5	JU1652	15
1e-5	1e-5	1e-5	1e-5	1e-5	1e-5	1e-5	1e-5	1e-5	1e-5	1e-5	1e-5	1e-5	0.99986	1e-5	JU1666	15
1e-5	1e-5	0.65108	1e-5	1e-5	1e-5	1e-5	1e-5	1e-5	1e-5	1e-5	1e-5	1e-5	0.34879	1e-5	JU1792	15
0.999858	1e-5	1e-5	1e-5	1e-5	1e-5	1e-5	1e-5	1e-5	1e-5	1e-5	1e-5	1.2e-5	1e-5	1e-5	JU1793	15
1e-5	1e-5	0.053253	1e-5	0.597062	1e-5	1e-5	0.186832	1e-5	1e-5	1e-5	1e-5	1e-5	0.162743	1e-5	JU1808	15
1e-5	1e-5	1e-5	1e-5	1e-5	1e-5	0.99986	1e-5	1e-5	1e-5	1e-5	1e-5	1e-5	1e-5	1e-5	JU1896	15
0.597296	1e-5	0.038176	1e-5	1e-5	1e-5	1e-5	1e-5	1e-5	1.2e-5	1e-5	1e-5	1e-5	0.364406	1e-5	JU1934	15
1e-5	0.206964	1e-5	1e-5	1e-5	1e-5	1e-5	1e-5	1e-5	1e-5	1e-5	0.195689	1e-5	0.597227	1e-5	JU2001	15
0.139444	1e-5	1e-5	1e-5	1e-5	1e-5	0.160062	0.650855	1e-5	0.049528	1e-5	1e-5	1e-5	1e-5	1e-5	JU2007	15
1e-5	1e-5	1e-5	1e-5	1e-5	1e-5	1e-5	1e-5	0.627082	1e-5	0.372788	1e-5	1e-5	1e-5	1e-5	JU2016	15
9.13e-4	0.086411	0.046725	1e-5	1e-5	0.0176	0.059744	0.013493	0.362581	0.141229	0.271243	1e-5	1e-5	1e-5	1e-5	JU2017	15
0.636276	1e-5	0.146698	1e-5	1e-5	1e-5	1e-5	1e-5	1e-5	1e-5	1e-5	1e-5	1e-5	0.216906	1e-5	JU2106	15
1e-5	1e-5	1e-5	1e-5	1e-5	1e-5	1e-5	1e-5	1e-5	0.052754	1e-5	1e-5	1e-5	0.947116	1e-5	JU2131	15
0.259263	1e-5	0.134603	1e-5	0.05738	1e-5	1e-5	1e-5	1e-5	1e-5	1e-5	1e-5	1e-5	0.548644	1e-5	JU2141	15
1e-5	1e-5	0.058524	1e-5	1e-5	1e-5	0.792808	1e-5	1e-5	1e-5	0.022033	0.126524	1e-5	1e-5	1e-5	JU2234	15
1e-5	1e-5	1.6e-5	1e-5	1e-5	1e-5	1e-5	1e-5	1e-5	1e-5	1e-5	1e-5	1e-5	0.999854	1e-5	JU2250	15
1e-5	1e-5	0.999853	1e-5	1e-5	1e-5	1e-5	1.7e-5	1e-5	1e-5	1e-5	1e-5	1e-5	1e-5	1e-5	JU2257	15
1e-5	1e-5	1e-5	0.999856	1.2e-5	1e-5	1e-5	1e-5	1e-5	1e-5	1e-5	1.1e-5	1.2e-5	1e-5	1e-5	JU2316	15
0.09233	1e-5	1e-5	1e-5	1e-5	1e-5	1e-5	1e-5	1e-5	0.118822	0.697696	0.00766	1e-5	0.083392	1e-5	JU2464	15
1e-5	1e-5	1e-5	1e-5	1e-5	1e-5	1e-5	1e-5	1e-5	1e-5	0.99986	1e-5	1e-5	1e-5	1e-5	JU2466	15
1e-5	1e-5	1e-5	1e-5	1.7e-5	1.3e-5	1e-5	1e-5	0.288833	1.1e-5	0.270606	1e-5	1.5e-5	0.440425	1e-5	JU2478	15
1e-5	1e-5	1e-5	1e-5	1e-5	1e-5	0.314558	1e-5	1e-5	1e-5	0.597649	1e-5	1e-5	0.087672	1e-5	JU2513	15
1e-5	1e-5	1e-5	0.560785	1e-5	1e-5	1e-5	1e-5	1e-5	1e-5	1e-5	0.439085	1e-5	1e-5	1e-5	JU2519	15
1e-5	1e-5	1e-5	1e-5	1e-5	1e-5	1e-5	1e-5	1e-5	0.116023	1e-5	0.883847	1e-5	1e-5	1e-5	JU2522	15
1e-5	1e-5	1e-5	0.999859	1.1e-5	1e-5	1e-5	1e-5	1e-5	1e-5	1e-5	1e-5	1e-5	1e-5	1e-5	JU2526	15
1e-5	1e-5	1e-5	1e-5	1e-5	1e-5	1e-5	0.01269	1e-5	1e-5	0.413174	1e-5	1e-5	0.574016	1e-5	JU2534	15
1e-5	1e-5	0.999855	1e-5	1e-5	1e-5	1e-5	1e-5	1e-5	1e-5	1e-5	1e-5	1e-5	1.5e-5	1e-5	JU2565	15
1e-5	1e-5	0.724126	1e-5	1e-5	1e-5	1e-5	1e-5	1.1e-5	1e-5	0.093806	1e-5	1e-5	0.181946	1e-5	JU2566	15
1e-5	1e-5	1e-5	1e-5	1e-5	1e-5	1e-5	1e-5	1e-5	1e-5	1e-5	1e-5	1e-5	0.99986	1e-5	JU2570	15
1e-5	1e-5	0.686694	1e-5	1e-5	1e-5	1e-5	1e-5	1e-5	1e-5	1e-5	1e-5	1e-5	0.313176	1e-5	JU2572	15
1e-5	1e-5	0.664192	1e-5	0.112087	1e-5	0.083101	1e-5	1e-5	1e-5	1e-5	1e-5	1e-5	0.140511	1e-5	JU2575	15
0.161632	0.068379	2.6e-5	1e-5	1e-5	1e-5	1e-5	1e-5	1e-5	1e-5	0.294389	1e-5	1e-5	0.475475	1e-5	JU2576	15
1e-5	1e-5	1e-5	1e-5	1e-5	1e-5	1e-5	0.085101	1e-5	0.418259	0.49652	1e-5	1e-5	1e-5	1e-5	JU2578	15
0.065091	1e-5	1e-5	0.306393	1e-5	1e-5	0.016934	0.054841	1e-5	0.556641	1e-5	1e-5	1e-5	1e-5	1e-5	JU258	15
1e-5	1e-5	1e-5	1e-5	0.548547	1e-5	1e-5	0.422792	1e-5	1e-5	0.028541	1e-5	1e-5	1e-5	1e-5	JU2581	15
0.105722	1e-5	1e-5	1.9e-5	1e-5	1e-5	0.007365	0.03894	1e-5	0.248216	0.109188	0.49047	1e-5	1e-5	1e-5	JU2586	15
0.001917	1e-5	1e-5	1e-5	0.144331	1e-5	1e-5	0.796141	0.057502	1e-5	1e-5	1e-5	1e-5	1e-5	1e-5	JU2587	15
1e-5	1e-5	0.792559	0.013463	1e-5	1e-5	1e-5	1e-5	1e-5	0.083417	1e-5	1e-5	1e-5	0.110451	1e-5	JU2592	15
1e-5	1e-5	1e-5	1e-5	0.333609	1e-5	1e-5	0.666261	1e-5	1e-5	1e-5	1e-5	1e-5	1e-5	1e-5	JU2593	15
0.999851	1e-5	1e-5	1e-5	1e-5	1e-5	1e-5	1e-5	1e-5	1.7e-5	1e-5	1e-5	1.2e-5	1e-5	1e-5	JU2600	15
0.999844	1e-5	1.5e-5	1e-5	1e-5	1e-5	1e-5	1e-5	1e-5	1.9e-5	1e-5	1e-5	1.2e-5	1e-5	1e-5	JU2610	15
1e-5	1e-5	1e-5	1e-5	1e-5	1e-5	1e-5	1e-5	0.114014	1e-5	0.744818	0.141048	1e-5	1e-5	1e-5	JU2619	15
1e-5	1e-5	1e-5	1e-5	1e-5	1e-5	0.625947	1e-5	1e-5	1e-5	1e-5	1e-5	1e-5	0.373923	1e-5	JU2800	15
1e-5	1e-5	1e-5	1e-5	1e-5	0.083508	1e-5	1e-5	1e-5	1e-5	0.332498	0.583874	1e-5	1e-5	1e-5	JU2811	15
0.08252	1e-5	0.91735	1e-5	1e-5	1e-5	1e-5	1e-5	1e-5	1e-5	1e-5	1e-5	1e-5	1e-5	1e-5	JU2825	15
1e-5	1e-5	1e-5	1e-5	0.434211	1e-5	1e-5	0.565659	1e-5	1e-5	1e-5	1e-5	1e-5	1e-5	1e-5	JU2829	15
1e-5	1e-5	1e-5	1e-5	0.242675	1e-5	1e-5	0.171804	1e-5	0.585401	1e-5	1e-5	1e-5	1e-5	1e-5	JU2838	15
0.351966	1e-5	1e-5	1e-5	1e-5	1e-5	0.124709	0.251046	1e-5	1e-5	0.272168	1e-5	1e-5	1e-5	1e-5	JU2841	15
1e-5	1e-5	0.291023	1e-5	1e-5	1e-5	1e-5	0.052988	1e-5	0.079967	0.412815	0.163108	1e-5	1e-5	1e-5	JU2853	15
1e-5	1e-5	0.006384	1e-5	1e-5	1e-5	1e-5	0.389951	0.411269	1e-5	1e-5	0.131551	1e-5	0.060744	1e-5	JU2862	15
1e-5	1e-5	1e-5	1e-5	1e-5	1e-5	1e-5	1e-5	0.99986	1e-5	1e-5	1e-5	1e-5	1e-5	1e-5	JU2866	15
1e-5	1e-5	1e-5	1e-5	1e-5	1e-5	1e-5	1e-5	0.136802	0.085934	0.777144	1e-5	1e-5	1e-5	1e-5	JU2878	15
1e-5	0.126288	1e-5	1e-5	0.44562	1e-5	1e-5	1e-5	0.288901	1e-5	0.139081	1e-5	1e-5	1e-5	1e-5	JU2879	15
1e-5	1.1e-5	0.044137	1e-5	1e-5	1e-5	0.430551	0.122665	1e-5	1e-5	0.129225	1e-5	1e-5	0.273321	1e-5	JU2906	15
1e-5	1e-5	0.547485	1e-5	1e-5	1e-5	0.052275	0.049344	1e-5	1e-5	0.350787	1e-5	1e-5	1e-5	1e-5	JU2907	15
1e-5	1e-5	1e-5	1e-5	1e-5	1e-5	1e-5	0.448994	1e-5	1e-5	1e-5	1e-5	1e-5	0.550876	1e-5	JU310	15
1e-5	1e-5	0.659449	1e-5	0.213572	1e-5	1e-5	1e-5	1e-5	1e-5	1e-5	1e-5	1e-5	0.126859	1e-5	JU311	15
1e-5	1e-5	1e-5	1e-5	1e-5	1e-5	0.552857	1e-5	1e-5	1e-5	0.001441	0.445581	1e-5	1e-5	1e-5	JU3125	15
1e-5	1e-5	0.103639	1e-5	1e-5	1e-5	0.166929	1e-5	1e-5	0.071956	0.143523	0.513852	1e-5	1e-5	1e-5	JU3127	15
1e-5	1e-5	1e-5	1e-5	1e-5	1e-5	0.43607	0.097975	1e-5	1e-5	0.259285	1e-5	1e-5	0.206561	1e-5	JU3128	15
0.265942	1e-5	1e-5	1e-5	1e-5	1e-5	1e-5	1e-5	1e-5	1e-5	1e-5	0.068504	1e-5	0.665434	1e-5	JU3132	15
1e-5	1e-5	0.020891	1e-5	1e-5	1e-5	1e-5	0.465072	1e-5	1e-5	0.318418	0.104046	1e-5	0.091473	1e-5	JU3134	15
1e-5	1e-5	1e-5	1e-5	1e-5	1e-5	1e-5	1e-5	1e-5	1e-5	0.99986	1e-5	1e-5	1e-5	1e-5	JU3135	15
1e-5	1e-5	1e-5	1e-5	1e-5	1e-5	0.174124	1e-5	1e-5	1e-5	1e-5	0.48646	1e-5	0.339296	1e-5	JU3137	15
1e-5	1e-5	1e-5	1e-5	1e-5	1e-5	1e-5	1e-5	1e-5	1e-5	1e-5	1e-5	1e-5	0.99986	1e-5	JU3140	15
1e-5	1e-5	1e-5	1e-5	1e-5	1e-5	1e-5	0.876372	1e-5	1e-5	1e-5	1e-5	1e-5	0.123498	1e-5	JU3144	15
1e-5	1e-5	1e-5	1e-5	1e-5	1e-5	1e-5	1e-5	1e-5	0.168871	0.30204	1e-5	1e-5	0.528969	1e-5	JU323	15
1e-5	1e-5	1e-5	1e-5	1e-5	1e-5	0.219821	0.378278	1e-5	1e-5	1e-5	1e-5	1e-5	0.401781	1e-5	JU346	15
1e-5	1e-5	1e-5	1e-5	0.04434	1e-5	1e-5	0.95553	1e-5	1e-5	1e-5	1e-5	1e-5	1e-5	1e-5	JU360	15
1e-5	1e-5	0.787826	1e-5	1e-5	1e-5	0.17029	0.041765	1e-5	1e-5	1e-5	1e-5	1e-5	1e-5	1e-5	JU367	15
0.82622	1e-5	0.173647	1e-5	1e-5	1e-5	1e-5	1.3e-5	1e-5	1e-5	1e-5	1e-5	1e-5	1e-5	1e-5	JU393	15
1e-5	1e-5	0.99986	1e-5	1e-5	1e-5	1e-5	1e-5	1e-5	1e-5	1e-5	1e-5	1e-5	1e-5	1e-5	JU394	15
1e-5	1e-5	0.222133	1e-5	1e-5	1e-5	1e-5	1.3e-5	1e-5	1e-5	1e-5	1e-5	1e-5	0.777734	1e-5	JU397	15
1e-5	1e-5	0.99986	1e-5	1e-5	1e-5	1e-5	1e-5	1e-5	1e-5	1e-5	1e-5	1e-5	1e-5	1e-5	JU406	15
1e-5	1e-5	0.612499	1e-5	1e-5	1e-5	0.004349	1e-5	1e-5	1e-5	0.1933	1e-5	1e-5	0.189742	1e-5	JU440	15
1e-5	1e-5	1e-5	1e-5	1e-5	1e-5	0.732659	1e-5	1e-5	1e-5	0.267211	1e-5	1e-5	1e-5	1e-5	JU561	15
1e-5	1e-5	1e-5	1e-5	1e-5	1e-5	1e-5	0.515718	1e-5	0.019108	0.185936	0.10647	1e-5	0.172669	1e-5	JU642	15
1e-5	1e-5	1e-5	1e-5	0.192391	1e-5	1e-5	0.807479	1e-5	1e-5	1e-5	1e-5	1e-5	1e-5	1e-5	JU751	15
1e-5	1e-5	1e-5	1e-5	1e-5	0.050578	0.062058	0.168822	1e-5	0.097114	0.160571	0.460767	1e-5	1e-5	1e-5	JU774	15
1e-5	1e-5	1e-5	0.85339	1e-5	1e-5	1e-5	1e-5	1e-5	1e-5	1e-5	0.14648	1e-5	1e-5	1e-5	JU775	15
1e-5	1e-5	1e-5	1e-5	1e-5	1e-5	1e-5	1e-5	1e-5	1e-5	1e-5	0.99986	1e-5	1e-5	1e-5	JU778	15
1e-5	1e-5	1e-5	0.261189	1e-5	1e-5	0.017966	1e-5	1e-5	1e-5	1e-5	0.720725	1e-5	1e-5	1e-5	JU782	15
1e-5	1e-5	1e-5	1e-5	1e-5	1e-5	1e-5	1e-5	1e-5	1e-5	1e-5	1e-5	1e-5	0.99986	1e-5	JU792	15
1e-5	1e-5	1e-5	1e-5	0.116772	1e-5	0.127975	0.736912	1e-5	1e-5	0.018231	1e-5	1e-5	1e-5	1e-5	JU830	15
1e-5	1e-5	1e-5	1e-5	1e-5	1e-5	0.135294	1e-5	1e-5	0.030252	0.150039	1e-5	1e-5	0.684305	1e-5	JU847	15
1e-5	1e-5	1e-5	1e-5	0.124451	1e-5	1e-5	1e-5	1e-5	1e-5	0.737265	0.101233	1e-5	0.036941	1e-5	KR314	15
1e-5	1e-5	1e-5	1e-5	1e-5	1e-5	1e-5	1e-5	1e-5	0.144627	0.09256	0.762694	1e-5	1e-5	1e-5	LKC34	15
1e-5	1e-5	0.99986	1e-5	1e-5	1e-5	1e-5	1e-5	1e-5	1e-5	1e-5	1e-5	1e-5	1e-5	1e-5	LSJ1	15
1e-5	1e-5	1e-5	1e-5	1e-5	1e-5	1e-5	0.168807	1e-5	0.553524	0.277549	1e-5	1e-5	1e-5	1e-5	MY1	15
0.019641	1e-5	1e-5	0.093582	1e-5	1e-5	0.005671	0.325466	1e-5	1e-5	0.353223	0.202326	1e-5	1e-5	1e-5	MY10	15
1e-5	1e-5	1e-5	1e-5	0.99986	1e-5	1e-5	1e-5	1e-5	1e-5	1e-5	1e-5	1e-5	1e-5	1e-5	MY16	15
1e-5	1e-5	1e-5	1e-5	0.99986	1e-5	1e-5	1e-5	1e-5	1e-5	1e-5	1e-5	1e-5	1e-5	1e-5	MY18	15
1e-5	1e-5	1e-5	1e-5	1e-5	1e-5	0.594319	1e-5	1e-5	1e-5	1e-5	1e-5	1e-5	0.405551	1e-5	MY2147	15
1e-5	1e-5	1e-5	1e-5	0.086257	1e-5	0.200266	1e-5	1e-5	1e-5	0.530233	1e-5	1e-5	0.183134	1e-5	MY2212	15
1e-5	0.381864	1e-5	1e-5	0.61800600000000006	1e-5	1e-5	1e-5	1e-5	1e-5	1e-5	1e-5	1e-5	1e-5	1e-5	MY23	15
1e-5	1e-5	0.384519	1e-5	0.204869	1e-5	1e-5	1e-5	1e-5	1e-5	0.09549	0.001173	1e-5	0.313849	1e-5	MY2453	15
1e-5	1e-5	1e-5	1e-5	1e-5	1e-5	0.355311	1e-5	1e-5	1e-5	0.37968	0.11047	1e-5	0.154429	1e-5	MY2530	15
1e-5	1e-5	1e-5	1e-5	1e-5	1e-5	0.052915	0.827187	1e-5	1e-5	0.119778	1e-5	1e-5	1e-5	1e-5	MY2535	15
1e-5	1e-5	0.307739	1e-5	1e-5	1e-5	1e-5	1e-5	1e-5	1e-5	1e-5	1e-5	1e-5	0.692131	1e-5	MY2573	15
1e-5	1e-5	1e-5	1e-5	1e-5	1e-5	1e-5	1e-5	1e-5	1e-5	0.99986	1e-5	1e-5	1e-5	1e-5	MY2585	15
1e-5	1e-5	1e-5	1e-5	1e-5	1e-5	1e-5	1e-5	1e-5	1e-5	0.99986	1e-5	1e-5	1e-5	1e-5	MY2693	15
1e-5	1e-5	1e-5	1e-5	1e-5	1e-5	1e-5	1e-5	1e-5	1e-5	0.99986	1e-5	1e-5	1e-5	1e-5	MY2713	15
1e-5	1e-5	1e-5	1e-5	0.611836	1e-5	1e-5	1e-5	1e-5	1e-5	0.388034	1e-5	1e-5	1e-5	1e-5	MY2741	15
1e-5	1e-5	1e-5	1e-5	0.351302	1e-5	1e-5	1e-5	0.34749	1e-5	0.283529	0.017568	1e-5	1e-5	1e-5	MY518	15
1e-5	1e-5	1e-5	1e-5	1e-5	1e-5	1e-5	1e-5	1e-5	1e-5	0.918662	0.081208	1e-5	1e-5	1e-5	MY679	15
1e-5	1e-5	1e-5	1e-5	1e-5	1e-5	0.168113	0.217293	1e-5	1e-5	1e-5	1e-5	1e-5	0.614474	1e-5	MY772	15
1e-5	1e-5	1e-5	1e-5	0.99986	1e-5	1e-5	1e-5	1e-5	1e-5	1e-5	1e-5	1e-5	1e-5	1e-5	MY795	15
1e-5	1e-5	1e-5	1e-5	1e-5	1e-5	0.666841	1e-5	1e-5	1e-5	0.129808	1e-5	1e-5	0.203231	1e-5	MY920	15
1e-5	1e-5	0.99986	1e-5	1e-5	1e-5	1e-5	1e-5	1e-5	1e-5	1e-5	1e-5	1e-5	1e-5	1e-5	N2	15
1e-5	1e-5	1e-5	1e-5	1e-5	1e-5	1e-5	1e-5	1e-5	1e-5	0.499366	0.090051	1e-5	0.410463	1e-5	NIC1	15
1e-5	1e-5	0.334638	1e-5	1e-5	1e-5	1e-5	1e-5	1e-5	0.010383999999999999	1e-5	1e-5	1e-5	0.654857	1e-5	NIC1049	15
1e-5	1e-5	0.72774	1e-5	1e-5	1e-5	1e-5	1e-5	1e-5	1.2e-5	1e-5	1e-5	1e-5	0.272128	1e-5	NIC1107	15
1e-5	1e-5	0.023868	1e-5	1e-5	1e-5	1e-5	0.070805	1e-5	0.287487	0.214925	1e-5	1e-5	0.402814	1e-5	NIC166	15
0.111179	1e-5	1e-5	0.260384	0.013772	1e-5	0.266362	1e-5	1e-5	0.247338	1e-5	0.100875	1e-5	1e-5	1e-5	NIC195	15
0.232632	1e-5	1e-5	0.470515	1e-5	1e-5	1e-5	1e-5	1e-5	0.243959	1e-5	1e-5	1e-5	0.052785	1e-5	NIC199	15
1e-5	1e-5	0.384629	1e-5	1e-5	1e-5	0.213488	1e-5	1e-5	1e-5	0.401762	1e-5	1e-5	1e-5	1e-5	NIC2	15
1e-5	1e-5	0.079897	1e-5	1e-5	1e-5	0.034388	1e-5	1e-5	1e-5	0.528393	0.15538	1e-5	0.201843	1e-5	NIC207	15
1e-5	1e-5	1e-5	1e-5	1e-5	1e-5	1e-5	1e-5	1e-5	1e-5	0.767132	0.232738	1e-5	1e-5	1e-5	NIC231	15
1e-5	1e-5	1e-5	1e-5	1e-5	1e-5	1e-5	1e-5	1e-5	1e-5	1e-5	0.99986	1e-5	1e-5	1e-5	NIC236	15
1e-5	1e-5	0.450143	1e-5	1e-5	1e-5	1e-5	0.065006	1e-5	1e-5	1e-5	0.342165	1e-5	0.142576	1e-5	NIC242	15
1e-5	0.027757	0.053974	0.767287	0.066848	1e-5	0.008193	1e-5	1e-5	0.075851	1e-5	1e-5	1e-5	1e-5	1e-5	NIC251	15
1e-5	1e-5	1e-5	1e-5	1e-5	1e-5	1e-5	1e-5	1e-5	0.880582	1e-5	0.119288	1e-5	1e-5	1e-5	NIC252	15
1e-5	1e-5	0.28489	1e-5	1e-5	1e-5	1e-5	0.083808	1e-5	1e-5	0.505422	1e-5	1e-5	0.125769	1e-5	NIC255	15
1e-5	1e-5	1e-5	0.198394	1e-5	1e-5	1e-5	1e-5	1e-5	1e-5	1e-5	0.801476	1e-5	1e-5	1e-5	NIC256	15
1e-5	1e-5	1e-5	0.83481	1e-5	1e-5	1e-5	1e-5	1e-5	1e-5	1e-5	0.165056	1.4e-5	1e-5	1e-5	NIC258	15
1e-5	1e-5	1e-5	1e-5	1e-5	1e-5	0.011373	1e-5	1e-5	1e-5	1e-5	0.892806	1e-5	0.095701	1e-5	NIC259	15
1e-5	1e-5	1e-5	0.460847	1e-5	1e-5	1e-5	1e-5	1e-5	1e-5	0.089298	0.449734	1e-5	1e-5	1e-5	NIC260	15
1e-5	1e-5	1e-5	0.544875	1e-5	1e-5	1e-5	1e-5	1e-5	1e-5	1e-5	0.454991	1.4e-5	1e-5	1e-5	NIC261	15
1e-5	1e-5	1e-5	0.341538	1e-5	1e-5	1e-5	1e-5	1e-5	1e-5	1e-5	0.658332	1e-5	1e-5	1e-5	NIC262	15
1e-5	1e-5	1e-5	0.99986	1e-5	1e-5	1e-5	1e-5	1e-5	1e-5	1e-5	1e-5	1e-5	1e-5	1e-5	NIC265	15
1e-5	1e-5	0.236201	1e-5	1e-5	1e-5	1e-5	1e-5	1e-5	0.763669	1e-5	1e-5	1e-5	1e-5	1e-5	NIC266	15
1e-5	1e-5	1e-5	1e-5	1e-5	1e-5	1e-5	1e-5	1e-5	0.878971	0.120899	1e-5	1e-5	1e-5	1e-5	NIC267	15
1e-5	0.285011	1e-5	1e-5	0.079412	1e-5	1e-5	1e-5	1e-5	0.635457	1e-5	1e-5	1e-5	1e-5	1e-5	NIC268	15
0.06486	1e-5	1e-5	1e-5	1e-5	1e-5	1e-5	1e-5	1e-5	0.580821	1e-5	0.298588	1e-5	0.055621	1e-5	NIC269	15
1e-5	1e-5	1.3e-5	0.21382	1e-5	1e-5	1e-5	1e-5	1e-5	1.8e-5	1e-5	0.78603	2e-5	1e-5	1e-5	NIC271	15
1e-5	1e-5	1e-5	1e-5	1e-5	1e-5	1e-5	1e-5	1e-5	0.99986	1e-5	1e-5	1e-5	1e-5	1e-5	NIC272	15
1e-5	1e-5	1e-5	1e-5	1e-5	1e-5	1e-5	1e-5	1e-5	0.99986	1e-5	1e-5	1e-5	1e-5	1e-5	NIC274	15
1e-5	1e-5	1e-5	1e-5	1e-5	1e-5	1e-5	1e-5	1e-5	0.273574	0.311314	0.414992	1e-5	1e-5	1e-5	NIC275	15
1e-5	1e-5	1e-5	1e-5	1e-5	1e-5	1e-5	1e-5	1e-5	0.99986	1e-5	1e-5	1e-5	1e-5	1e-5	NIC276	15
1e-5	1e-5	1e-5	1e-5	1e-5	1e-5	1e-5	0.540755	1e-5	1e-5	1e-5	1e-5	1e-5	0.459115	1e-5	NIC277	15
1e-5	1e-5	1e-5	1e-5	1e-5	1e-5	1e-5	0.250869	0.014552	0.002875	0.190679	1e-5	1e-5	0.540925	1e-5	NIC3	15
0.492337	1e-5	1e-5	1e-5	2e-5	1e-5	1e-5	1e-5	1e-5	1e-5	1e-5	1e-5	1e-5	0.507522	1e-5	NIC501	15
1e-5	1e-5	1e-5	1e-5	1e-5	1e-5	0.45466	0.336248	1e-5	1e-5	1e-5	1e-5	1e-5	0.208972	1e-5	NIC511	15
1e-5	1e-5	1e-5	1e-5	1e-5	1e-5	1e-5	1e-5	1e-5	0.292202	1e-5	0.707668	1e-5	1e-5	1e-5	NIC513	15
1e-5	1e-5	1e-5	1e-5	1e-5	1e-5	1e-5	1e-5	1e-5	0.319809	1e-5	0.680061	1e-5	1e-5	1e-5	NIC514	15
0.122231	1e-5	1e-5	1e-5	1e-5	1e-5	1.4e-5	0.509925	1e-5	0.167776	1e-5	0.199955	1e-5	1e-5	1e-5	NIC515	15
1e-5	1e-5	0.045498	1e-5	1e-5	1e-5	0.229251	0.352525	1e-5	1e-5	1e-5	0.372616	1e-5	1e-5	1e-5	NIC522	15
1e-5	0.087404	1e-5	1e-5	1e-5	1e-5	1e-5	1e-5	1e-5	1e-5	0.483721	0.428755	1e-5	1e-5	1e-5	NIC523	15
1e-5	1e-5	1e-5	1e-5	1e-5	1e-5	1e-5	0.810104	1e-5	1e-5	1e-5	0.189766	1e-5	1e-5	1e-5	NIC526	15
0.31114000000000003	1e-5	1e-5	1e-5	1e-5	1e-5	1e-5	0.607535	1e-5	1e-5	1e-5	1e-5	1e-5	0.081206	1e-5	NIC527	15
1e-5	1e-5	1e-5	1e-5	1e-5	1e-5	1e-5	0.741234	1e-5	1e-5	0.258636	1e-5	1e-5	1e-5	1e-5	NIC528	15
1e-5	1e-5	0.123204	1e-5	1e-5	1e-5	1e-5	0.453206	1e-5	0.072053	0.316198	0.035239	1e-5	1e-5	1e-5	NIC529	15
1e-5	1e-5	1e-5	1e-5	1e-5	1e-5	0.005771	1e-5	0.084764	1e-5	0.909345	1e-5	1e-5	1e-5	1e-5	PB303	15
1e-5	1e-5	1e-5	1e-5	1e-5	1e-5	1e-5	1e-5	0.99986	1e-5	1e-5	1e-5	1e-5	1e-5	1e-5	PB306	15
1e-5	1e-5	1e-5	1e-5	1e-5	1.3e-5	1e-5	1e-5	0.999857	1e-5	1e-5	1e-5	1e-5	1e-5	1e-5	PS2025	15
1e-5	1e-5	1e-5	1e-5	1e-5	1e-5	0.704879	1e-5	1e-5	1e-5	0.294991	1e-5	1e-5	1e-5	1e-5	PX179	15
0.089507	1e-5	1e-5	0.033935	0.194225	1e-5	0.229762	0.135596	0.169536	0.132208	0.015162	1e-5	1e-5	1e-5	1e-5	QG2075	15
1e-5	1e-5	1e-5	1e-5	1e-5	1e-5	1e-5	0.155559	0.082095	1e-5	0.529788	0.232449	1e-5	1e-5	1e-5	QG536	15
1e-5	0.081434	1e-5	1e-5	1e-5	0.003038	1e-5	0.003373	0.912044	1e-5	1e-5	1e-5	1e-5	1e-5	1e-5	QG556	15
1e-5	1e-5	1e-5	1e-5	1e-5	1e-5	1e-5	1e-5	0.99986	1e-5	1e-5	1e-5	1e-5	1e-5	1e-5	QG557	15
0.225622	1e-5	1e-5	0.029226	1e-5	1e-5	0.191787	1e-5	1e-5	1e-5	0.249815	0.249816	0.053645	1e-5	1e-5	QW947	15
1e-5	1e-5	1e-5	1.5e-5	1e-5	1.7e-5	1e-5	1e-5	1e-5	1e-5	1e-5	1e-5	0.999848	1e-5	1e-5	QX1211	15
1e-5	1e-5	1e-5	1e-5	0.105759	1e-5	1e-5	1e-5	0.847241	1e-5	0.046881	1e-5	1e-5	1e-5	1e-5	QX1212	15
1e-5	1e-5	1e-5	1e-5	1e-5	1e-5	1e-5	1e-5	0.77717	1e-5	0.2227	1e-5	1e-5	1e-5	1e-5	QX1233	15
0.03058	0.671196	0.025172	0.004206	1e-5	1e-5	0.144212	0.124541	1.4e-5	1e-5	1e-5	1e-5	1e-5	1e-5	1e-5	QX1791	15
1e-5	0.597507	1e-5	1e-5	1e-5	1e-5	1e-5	1e-5	1e-5	1e-5	0.186519	0.215854	1e-5	1e-5	1e-5	QX1792	15
1e-5	0.696848	1e-5	1e-5	0.056031	0.095556	1e-5	1e-5	0.001741	1e-5	1e-5	0.149724	1e-5	1e-5	1e-5	QX1793	15
1e-5	0.798952	1e-5	1e-5	1e-5	1e-5	1e-5	1e-5	0.200918	1e-5	1e-5	1e-5	1e-5	1e-5	1e-5	QX1794	15
1e-5	1e-5	1e-5	1e-5	1e-5	1e-5	1e-5	1e-5	1e-5	1e-5	0.99986	1e-5	1e-5	1e-5	1e-5	RC301	15
0.056032	1e-5	1e-5	0.221155	0.314008	1e-5	1e-5	0.408695	1e-5	1e-5	1e-5	1e-5	1e-5	1e-5	1e-5	WN2001	15
0.057504	1e-5	1e-5	1e-5	1e-5	1e-5	0.557673	0.052963	1e-5	1e-5	0.176003	0.155757	1e-5	1e-5	1e-5	WN2002	15
1e-5	1e-5	1e-5	1e-5	0.402902	1e-5	0.137669	1e-5	1e-5	1e-5	0.459309	1e-5	1e-5	1e-5	1e-5	WN2033	15
0.686802	1e-5	0.313068	1e-5	1e-5	1e-5	1e-5	1e-5	1e-5	1e-5	1e-5	1e-5	1e-5	1e-5	1e-5	WN2050	15
1e-5	0.732082	1e-5	1e-5	1e-5	1e-5	1e-5	1e-5	0.267788	1e-5	1e-5	1e-5	1e-5	1e-5	1e-5	XZ1513	15
1e-5	1e-5	1e-5	1e-5	1e-5	1e-5	1e-5	1e-5	1e-5	1e-5	1e-5	1e-5	0.99986	1e-5	1e-5	XZ1514	15
1e-5	0.506132	1e-5	1e-5	1.3e-5	1.8e-5	1e-5	1e-5	0.410946	1e-5	1e-5	1e-5	0.082792	1e-5	1e-5	XZ1515	15
1e-5	0.001245	1e-5	0.121398	1e-5	1e-5	1e-5	1e-5	1e-5	1e-5	1e-5	1e-5	0.657098	1e-5	0.220149	XZ1516	15
1e-5	0.32626	1e-5	1e-5	1e-5	1e-5	1e-5	0.67362	1e-5	1e-5	1e-5	1e-5	1e-5	1e-5	NA	AB1	14
1e-5	1e-5	1e-5	1e-5	1e-5	1e-5	1e-5	1e-5	1e-5	1e-5	0.99987	1e-5	1e-5	1e-5	NA	BRC20067	14
1e-5	1e-5	0.072035	1e-5	0.025326	1e-5	0.234109	1e-5	1e-5	1e-5	0.668431	1e-5	1e-5	1e-5	NA	BRC20263	14
1e-5	0.99987	1e-5	1e-5	1e-5	1e-5	1e-5	1e-5	1e-5	1e-5	1e-5	1e-5	1e-5	1e-5	NA	CB4851	14
1e-5	0.215996	1e-5	1e-5	1e-5	1e-5	1e-5	0.571548	1e-5	1e-5	0.212346	1e-5	1e-5	1e-5	NA	CB4852	14
1e-5	1e-5	1e-5	1e-5	1e-5	0.629396	1e-5	1e-5	1e-5	1e-5	0.370484	1e-5	1e-5	1e-5	NA	CB4853	14
1e-5	1e-5	1e-5	1e-5	1e-5	1e-5	0.314941	1e-5	1e-5	1e-5	0.684939	1e-5	1e-5	1e-5	NA	CB4854	14
1.9e-5	1e-5	1e-5	1.9e-5	1e-5	0.756706	1e-5	1e-5	1e-5	1e-5	0.243156	1e-5	1e-5	1e-5	NA	CB4855	14
0.99987	1e-5	1e-5	1e-5	1e-5	1e-5	1e-5	1e-5	1e-5	1e-5	1e-5	1e-5	1e-5	1e-5	NA	CB4856	14
1e-5	1e-5	1e-5	1e-5	1e-5	0.99987	1e-5	1e-5	1e-5	1e-5	1e-5	1e-5	1e-5	1e-5	NA	CB4857	14
1e-5	1e-5	1e-5	1e-5	1e-5	0.99987	1e-5	1e-5	1e-5	1e-5	1e-5	1e-5	1e-5	1e-5	NA	CB4858	14
1e-5	0.543656	1e-5	1e-5	1e-5	1e-5	1.1e-5	0.042844	1e-5	0.41339	1e-5	1e-5	1e-5	1e-5	NA	CB4932	14
1e-5	1e-5	1e-5	1e-5	1e-5	0.653503	0.199731	0.052329	0.024167	1e-5	0.070181	1e-5	1e-5	1e-5	NA	CX11254	14
1e-5	1e-5	1e-5	1e-5	1e-5	0.99987	1e-5	1e-5	1e-5	1e-5	1e-5	1e-5	1e-5	1e-5	NA	CX11262	14
1e-5	1e-5	1e-5	1e-5	1e-5	0.99987	1e-5	1e-5	1e-5	1e-5	1e-5	1e-5	1e-5	1e-5	NA	CX11264	14
1e-5	1e-5	1e-5	1e-5	1e-5	0.303954	0.322787	0.31443	1e-5	1e-5	0.05873	1e-5	1e-5	1e-5	NA	CX11271	14
1e-5	0.00281	1e-5	1e-5	1e-5	0.620794	0.102025	0.195991	1e-5	1e-5	0.07829	1e-5	1e-5	1e-5	NA	CX11276	14
1e-5	1e-5	1e-5	1e-5	1e-5	0.664562	0.335318	1e-5	1e-5	1e-5	1e-5	1e-5	1e-5	1e-5	NA	CX11285	14
1e-5	1e-5	1e-5	1e-5	1e-5	0.690056	1e-5	1e-5	1e-5	1e-5	0.309824	1e-5	1e-5	1e-5	NA	CX11292	14
1e-5	1e-5	0.013281	1e-5	1e-5	0.599848	0.026435	1e-5	1e-5	0.098209	0.21952	1e-5	1e-5	0.042627	NA	CX11307	14
1e-5	1e-5	1e-5	1e-5	1e-5	0.99987	1e-5	1e-5	1e-5	1e-5	1e-5	1e-5	1e-5	1e-5	NA	CX11314	14
1e-5	1e-5	1e-5	1e-5	1e-5	0.827591	1e-5	1e-5	1e-5	1e-5	0.172289	1e-5	1e-5	1e-5	NA	CX11315	14
1e-5	1e-5	1e-5	1e-5	1e-5	1e-5	1e-5	1e-5	1e-5	0.827347	0.172533	1e-5	1e-5	1e-5	NA	DL200	14
1e-5	0.061574	1e-5	1e-5	1e-5	0.694541	0.052002	1e-5	0.027403	1e-5	0.16439	1e-5	1e-5	1e-5	NA	DL226	14
0.99987	1e-5	1e-5	1e-5	1e-5	1e-5	1e-5	1e-5	1e-5	1e-5	1e-5	1e-5	1e-5	1e-5	NA	DL238	14
1e-5	1e-5	1e-5	1e-5	0.842862	0.157018	1e-5	1e-5	1e-5	1e-5	1e-5	1e-5	1e-5	1e-5	NA	ECA189	14
1e-5	1e-5	1e-5	0.609557	1e-5	1e-5	1e-5	1e-5	1e-5	1e-5	1e-5	1e-5	0.390323	1e-5	NA	ECA191	14
1e-5	0.99987	1e-5	1e-5	1e-5	1e-5	1e-5	1e-5	1e-5	1e-5	1e-5	1e-5	1e-5	1e-5	NA	ECA252	14
1e-5	1e-5	1e-5	1e-5	1e-5	1e-5	1e-5	1e-5	1e-5	1e-5	1e-5	0.99987	1e-5	1e-5	NA	ECA347	14
1e-5	1e-5	1e-5	1e-5	1e-5	0.99987	1e-5	1e-5	1e-5	1e-5	1e-5	1e-5	1e-5	1e-5	NA	ECA348	14
1e-5	1e-5	1e-5	1e-5	1e-5	0.99987	1e-5	1e-5	1e-5	1e-5	1e-5	1e-5	1e-5	1e-5	NA	ECA349	14
1e-5	1e-5	1e-5	2e-5	1e-5	1e-5	1e-5	1e-5	1e-5	1e-5	1e-5	0.99986	1e-5	1e-5	NA	ECA36	14
1e-5	1e-5	1e-5	1e-5	1e-5	1e-5	1e-5	1e-5	1e-5	1e-5	1e-5	0.99987	1e-5	1e-5	NA	ECA363	14
0.99987	1e-5	1e-5	1e-5	1e-5	1e-5	1e-5	1e-5	1e-5	1e-5	1e-5	1e-5	1e-5	1e-5	NA	ECA369	14
1e-5	1e-5	1.5e-5	1e-5	0.758331	0.226158	0.015396	1e-5	1e-5	1e-5	1e-5	1e-5	1e-5	1e-5	NA	ECA372	14
1e-5	1e-5	1e-5	0.99987	1e-5	1e-5	1e-5	1e-5	1e-5	1e-5	1e-5	1e-5	1e-5	1e-5	NA	ECA396	14
0.133783	1e-5	1e-5	1e-5	1e-5	1e-5	1e-5	1e-5	1e-5	1e-5	1e-5	0.300821	0.521417	0.043879	NA	ECA701	14
0.99987	1e-5	1e-5	1e-5	1e-5	1e-5	1e-5	1e-5	1e-5	1e-5	1e-5	1e-5	1e-5	1e-5	NA	ECA703	14
1e-5	1e-5	1e-5	1e-5	0.99987	1e-5	1e-5	1e-5	1e-5	1e-5	1e-5	1e-5	1e-5	1e-5	NA	ECA705	14
0.99987	1e-5	1e-5	1e-5	1e-5	1e-5	1e-5	1e-5	1e-5	1e-5	1e-5	1e-5	1e-5	1e-5	NA	ECA706	14
1e-5	1e-5	1e-5	1e-5	0.927805	0.072075	1e-5	1e-5	1e-5	1e-5	1e-5	1e-5	1e-5	1e-5	NA	ECA710	14
1e-5	1e-5	1e-5	1e-5	0.99987	1e-5	1e-5	1e-5	1e-5	1e-5	1e-5	1e-5	1e-5	1e-5	NA	ECA712	14
1e-5	1e-5	1e-5	0.99987	1e-5	1e-5	1e-5	1e-5	1e-5	1e-5	1e-5	1e-5	1e-5	1e-5	NA	ECA722	14
1e-5	1e-5	1e-5	1e-5	1.5e-5	1.1e-5	1e-5	1e-5	1e-5	1e-5	1e-5	1e-5	0.999865	1e-5	NA	ECA723	14
1e-5	1e-5	1e-5	1e-5	1e-5	1e-5	1e-5	1e-5	1e-5	1e-5	1e-5	0.99987	1e-5	1e-5	NA	ECA724	14
1e-5	1e-5	1e-5	1e-5	1e-5	1e-5	1e-5	1e-5	1e-5	1e-5	1e-5	1e-5	0.99987	1e-5	NA	ECA730	14
0.99987	1e-5	1e-5	1e-5	1e-5	1e-5	1e-5	1e-5	1e-5	1e-5	1e-5	1e-5	1e-5	1e-5	NA	ECA732	14
0.99987	1e-5	1e-5	1e-5	1e-5	1e-5	1e-5	1e-5	1e-5	1e-5	1e-5	1e-5	1e-5	1e-5	NA	ECA733	14
1e-5	1e-5	1e-5	1e-5	0.715434	0.284446	1e-5	1e-5	1e-5	1e-5	1e-5	1e-5	1e-5	1e-5	NA	ECA738	14
1e-5	1e-5	1e-5	1e-5	1e-5	1e-5	1e-5	1e-5	1e-5	1e-5	1e-5	0.99987	1e-5	1e-5	NA	ECA740	14
1e-5	1e-5	1e-5	1.8e-5	1e-5	1e-5	1e-5	1e-5	1e-5	1e-5	1e-5	0.999862	1e-5	1e-5	NA	ECA741	14
1e-5	1e-5	1.5e-5	1e-5	1e-5	1e-5	1e-5	1e-5	1e-5	1e-5	1.5e-5	0.999861	1e-5	1e-5	NA	ECA742	14
1e-5	0.013692	1e-5	1e-5	0.843711	0.007097	1e-5	1e-5	1e-5	0.082873	0.052537	1e-5	1e-5	1e-5	NA	ECA743	14
1e-5	1e-5	1e-5	0.99987	1e-5	1e-5	1e-5	1e-5	1e-5	1e-5	1e-5	1e-5	1e-5	1e-5	NA	ECA744	14
1e-5	1e-5	1e-5	0.999863	1e-5	1e-5	1e-5	1e-5	1e-5	1e-5	1e-5	1.7e-5	1e-5	1e-5	NA	ECA745	14
1e-5	1e-5	1e-5	0.99987	1e-5	1e-5	1e-5	1e-5	1e-5	1e-5	1e-5	1e-5	1e-5	1e-5	NA	ECA746	14
1e-5	1e-5	1e-5	1e-5	0.99987	1e-5	1e-5	1e-5	1e-5	1e-5	1e-5	1e-5	1e-5	1e-5	NA	ECA760	14
1e-5	1e-5	1e-5	1e-5	0.99987	1e-5	1e-5	1e-5	1e-5	1e-5	1e-5	1e-5	1e-5	1e-5	NA	ECA768	14
1e-5	1e-5	1e-5	1e-5	0.99987	1e-5	1e-5	1e-5	1e-5	1e-5	1e-5	1e-5	1e-5	1e-5	NA	ECA777	14
1e-5	1e-5	1e-5	1e-5	0.99987	1e-5	1e-5	1e-5	1e-5	1e-5	1e-5	1e-5	1e-5	1e-5	NA	ECA778	14
1e-5	1e-5	1e-5	1e-5	0.99987	1e-5	1e-5	1e-5	1e-5	1e-5	1e-5	1e-5	1e-5	1e-5	NA	ECA807	14
1e-5	1e-5	1e-5	1e-5	0.99987	1e-5	1e-5	1e-5	1e-5	1e-5	1e-5	1e-5	1e-5	1e-5	NA	ECA812	14
1e-5	1e-5	1e-5	1e-5	1e-5	0.248358	1e-5	0.056029	0.626801	1e-5	0.068712	1e-5	1e-5	1e-5	NA	ED3005	14
1e-5	1e-5	1e-5	1e-5	1e-5	0.281434	0.070926	1e-5	0.257024	1e-5	0.390515	1e-5	1e-5	1e-5	NA	ED3011	14
1e-5	0.744064	1.6e-5	1e-5	1e-5	1e-5	1e-5	0.197324	1e-5	1e-5	0.058496	1e-5	1e-5	1e-5	NA	ED3012	14
1e-5	1e-5	1e-5	1e-5	1e-5	1e-5	1e-5	0.69403	1e-5	0.30585	1e-5	1e-5	1e-5	1e-5	NA	ED3017	14
1e-5	1e-5	1e-5	1e-5	1e-5	1e-5	0.593709	0.112451	1e-5	1e-5	0.293729	1e-5	1e-5	1e-5	NA	ED3040	14
1e-5	1e-5	1.1e-5	1e-5	1e-5	1e-5	0.204311	1e-5	0.257839	0.179516	0.358233	1e-5	1e-5	1e-5	NA	ED3046	14
1e-5	1e-5	1e-5	1e-5	1e-5	1e-5	0.191224	1e-5	1e-5	1e-5	0.808656	1e-5	1e-5	1e-5	NA	ED3048	14
1e-5	1e-5	1.7e-5	1.5e-5	1e-5	1e-5	0.208111	1e-5	0.268262	0.169711	0.353795	1.9e-5	1e-5	1e-5	NA	ED3049	14
1e-5	1e-5	1e-5	1e-5	1e-5	1e-5	0.648314	1e-5	1e-5	1e-5	0.351566	1e-5	1e-5	1e-5	NA	ED3052	14
1e-5	1e-5	1e-5	1e-5	1e-5	1e-5	1e-5	0.093362	1e-5	1e-5	0.906518	1e-5	1e-5	1e-5	NA	ED3073	14
1e-5	1e-5	0.070873	1e-5	1e-5	1e-5	1e-5	1e-5	1e-5	0.020817	0.908199	1e-5	1e-5	1e-5	NA	ED3077	14
1e-5	0.268524	1e-5	1e-5	1e-5	0.074085	1e-5	0.511688	1e-5	1e-5	0.145602	1e-5	1e-5	1e-5	NA	EG4347	14
1e-5	1e-5	0.150662	1.2e-5	1.1e-5	1e-5	0.041007	0.409905	0.345428	1e-5	0.052904	1e-5	1e-5	1e-5	NA	EG4349	14
1e-5	1e-5	1e-5	1e-5	1e-5	1e-5	0.589016	0.203689	1e-5	0.13222	0.074976	1e-5	1e-5	1e-5	NA	EG4724	14
1e-5	1e-5	1e-5	1e-5	1e-5	1e-5	0.664783	0.02729	1e-5	1e-5	0.13084	1e-5	1e-5	0.176988	NA	EG4725	14
1e-5	1e-5	1e-5	1e-5	1e-5	0.44803	1e-5	0.536692	1e-5	1e-5	0.015168	1e-5	1e-5	1e-5	NA	EG4946	14
1e-5	1e-5	1e-5	1e-5	1e-5	1e-5	1e-5	1e-5	1e-5	1e-5	0.99987	1e-5	1e-5	1e-5	NA	GXW1	14
1e-5	0.115582	1e-5	1e-5	1e-5	1e-5	1e-5	0.884298	1e-5	1e-5	1e-5	1e-5	1e-5	1e-5	NA	JT11398	14
1e-5	1e-5	1e-5	1e-5	1e-5	1e-5	1e-5	1e-5	1.3e-5	1e-5	0.999867	1e-5	1e-5	1e-5	NA	JU1088	14
1e-5	1e-5	1e-5	1e-5	1e-5	0.745813	1e-5	1e-5	1e-5	1e-5	0.254067	1e-5	1e-5	1e-5	NA	JU1172	14
1e-5	0.731786	1e-5	1e-5	1e-5	1e-5	1.5e-5	0.098168	1e-5	1e-5	0.169931	1e-5	1e-5	1e-5	NA	JU1200	14
1e-5	0.634632	0.365248	1e-5	1e-5	1e-5	1e-5	1e-5	1e-5	1.1e-5	1e-5	1e-5	1e-5	1e-5	NA	JU1212	14
1e-5	1e-5	0.463257	1e-5	1e-5	1e-5	1e-5	1e-5	1e-5	0.536623	1e-5	1e-5	1e-5	1e-5	NA	JU1213	14
1e-5	1e-5	1e-5	1e-5	1e-5	1e-5	1e-5	1e-5	1e-5	0.99987	1e-5	1e-5	1e-5	1e-5	NA	JU1242	14
1e-5	0.231152	0.768728	1e-5	1e-5	1e-5	1e-5	1e-5	1e-5	1e-5	1e-5	1e-5	1e-5	1e-5	NA	JU1246	14
1e-5	0.99987	1e-5	1e-5	1e-5	1e-5	1e-5	1e-5	1e-5	1e-5	1e-5	1e-5	1e-5	1e-5	NA	JU1249	14
1e-5	0.233557	1e-5	1e-5	1e-5	1e-5	1e-5	0.591493	1e-5	1e-5	0.17484	1e-5	1e-5	1e-5	NA	JU1395	14
1e-5	1e-5	0.013156	1e-5	1e-5	1e-5	0.252966	0.243857	1e-5	0.371721	0.055486	1e-5	1e-5	0.062734	NA	JU1400	14
1e-5	1e-5	1e-5	1e-5	1e-5	1e-5	0.166043	0.47496	1e-5	0.117796	0.241101	1e-5	1e-5	1e-5	NA	JU1409	14
1e-5	1e-5	1e-5	1e-5	1e-5	1e-5	1e-5	0.99987	1e-5	1e-5	1e-5	1e-5	1e-5	1e-5	NA	JU1440	14
1e-5	1e-5	0.142307	1e-5	1e-5	1e-5	0.647063	1e-5	1e-5	0.21052	1e-5	1e-5	1e-5	1e-5	NA	JU1491	14
1e-5	1e-5	1e-5	1e-5	1e-5	1e-5	1e-5	0.640387	1e-5	0.359493	1e-5	1e-5	1e-5	1e-5	NA	JU1530	14
1e-5	0.642074	1e-5	1e-5	1e-5	1e-5	1e-5	0.357806	1e-5	1e-5	1e-5	1e-5	1e-5	1e-5	NA	JU1543	14
1e-5	0.99987	1e-5	1e-5	1e-5	1e-5	1e-5	1e-5	1e-5	1e-5	1e-5	1e-5	1e-5	1e-5	NA	JU1568	14
1e-5	1e-5	0.99987	1e-5	1e-5	1e-5	1e-5	1e-5	1e-5	1e-5	1e-5	1e-5	1e-5	1e-5	NA	JU1580	14
1e-5	1e-5	0.580082	1e-5	1e-5	1e-5	1e-5	0.40686	1e-5	0.012949	1e-5	1e-5	1e-5	1e-5	NA	JU1581	14
1e-5	0.887269	1e-5	1e-5	1e-5	1e-5	1e-5	1e-5	1e-5	1e-5	0.112611	1e-5	1e-5	1e-5	NA	JU1586	14
1e-5	0.30339699999999997	0.044991	1e-5	1e-5	1e-5	0.014512	0.407452	1e-5	1e-5	0.207063	1e-5	1e-5	0.022504	NA	JU1652	14
1e-5	1e-5	1e-5	1e-5	1e-5	1e-5	1e-5	1e-5	1e-5	0.99987	1e-5	1e-5	1e-5	1e-5	NA	JU1666	14
1e-5	0.625038	1e-5	1e-5	1e-5	1e-5	1e-5	1e-5	1e-5	0.374842	1e-5	1e-5	1e-5	1e-5	NA	JU1792	14
1e-5	1e-5	0.99987	1e-5	1e-5	1e-5	1e-5	1e-5	1e-5	1e-5	1e-5	1e-5	1e-5	1e-5	NA	JU1793	14
1e-5	0.113844	1e-5	1e-5	1e-5	1e-5	1e-5	0.090386	0.589697	0.205973	1e-5	1e-5	1e-5	1e-5	NA	JU1808	14
0.02	0.597888	1e-5	1e-5	1e-5	1e-5	1e-5	0.382002	1e-5	1e-5	1e-5	1e-5	1e-5	1e-5	NA	JU1896	14
1e-5	0.013236	0.602537	1e-5	1e-5	1e-5	1e-5	1e-5	1e-5	0.384118	1e-5	1e-5	1e-5	1e-5	NA	JU1934	14
0.187267	1e-5	1e-5	1e-5	1e-5	1e-5	0.165871	1e-5	1e-5	0.646752	1e-5	1e-5	1e-5	1e-5	NA	JU2001	14
1e-5	1e-5	0.151538	1e-5	1e-5	1e-5	0.155771	0.692581	1e-5	1e-5	1e-5	1e-5	1e-5	1e-5	NA	JU2007	14
1e-5	1e-5	1e-5	1e-5	1e-5	0.674122	1.9e-5	1e-5	1e-5	1e-5	0.32575	1e-5	1e-5	1e-5	NA	JU2016	14
0.078264	0.087201	0.002018	1e-5	0.062927	0.339304	0.012712	1e-5	0.012709	1e-5	0.404804	1e-5	1e-5	1e-5	NA	JU2017	14
1e-5	0.134697	0.636446	1e-5	1e-5	1e-5	1e-5	1e-5	1.4e-5	0.228743	1e-5	1e-5	1e-5	1e-5	NA	JU2106	14
1e-5	1e-5	1e-5	1e-5	1e-5	1e-5	1e-5	1e-5	1e-5	0.99987	1e-5	1e-5	1e-5	1e-5	NA	JU2131	14
1e-5	0.187867	0.248351	1e-5	1e-5	1e-5	1e-5	1e-5	1e-5	0.563673	1e-5	1e-5	1e-5	1e-5	NA	JU2141	14
5.04e-4	0.515924	1e-5	1e-5	1e-5	1e-5	0.030126	0.291909	1e-5	1e-5	0.161447	1e-5	1e-5	1e-5	NA	JU2234	14
1e-5	1e-5	1e-5	1e-5	1e-5	1e-5	1e-5	1e-5	1e-5	0.99987	1e-5	1e-5	1e-5	1e-5	NA	JU2250	14
1e-5	0.99987	1e-5	1e-5	1e-5	1e-5	1e-5	1e-5	1e-5	1e-5	1e-5	1e-5	1e-5	1e-5	NA	JU2257	14
1e-5	1e-5	1e-5	1e-5	1e-5	1e-5	1e-5	1e-5	1e-5	1e-5	1e-5	1e-5	1e-5	0.99987	NA	JU2316	14
1e-5	1e-5	0.088036	1e-5	1e-5	1e-5	0.141839	1e-5	1e-5	0.070905	0.699121	1e-5	1e-5	1e-5	NA	JU2464	14
1e-5	1e-5	1e-5	1e-5	1e-5	1e-5	1e-5	1e-5	1e-5	1e-5	0.99987	1e-5	1e-5	1e-5	NA	JU2466	14
1e-5	1e-5	1e-5	1e-5	1e-5	0.310979	1e-5	1e-5	1e-5	0.436783	0.252128	1e-5	1e-5	1e-5	NA	JU2478	14
1e-5	0.056404	1e-5	1e-5	1e-5	1e-5	1e-5	0.287136	1e-5	0.05627	0.60009	1e-5	1e-5	1e-5	NA	JU2513	14
1e-5	1e-5	1.7e-5	1e-5	1e-5	1e-5	0.370912	1e-5	1e-5	1e-5	1e-5	1e-5	1e-5	0.628961	NA	JU2519	14
1e-5	1e-5	1e-5	1e-5	1e-5	1e-5	0.99987	1e-5	1e-5	1e-5	1e-5	1e-5	1e-5	1e-5	NA	JU2522	14
1e-5	1e-5	1e-5	1e-5	1e-5	1e-5	1e-5	1e-5	1e-5	1e-5	1e-5	1e-5	1e-5	0.99987	NA	JU2526	14
1e-5	1e-5	1e-5	1e-5	1e-5	1e-5	1e-5	0.304236	1e-5	0.442865	0.252789	1e-5	1e-5	1e-5	NA	JU2534	14
1e-5	0.99987	1e-5	1e-5	1e-5	1e-5	1e-5	1e-5	1e-5	1e-5	1e-5	1e-5	1e-5	1e-5	NA	JU2565	14
1e-5	0.721579	1e-5	1e-5	1e-5	1e-5	1e-5	1e-5	1e-5	0.19022	0.088091	1e-5	1e-5	1e-5	NA	JU2566	14
1e-5	1e-5	1e-5	1e-5	1e-5	1e-5	1e-5	1e-5	1e-5	0.99987	1e-5	1e-5	1e-5	1e-5	NA	JU2570	14
1e-5	0.666871	1e-5	1e-5	1e-5	1e-5	1e-5	0.030132	1e-5	0.302886	1e-5	1e-5	1e-5	1e-5	NA	JU2572	14
1e-5	0.81304	1e-5	1e-5	1e-5	1e-5	1e-5	1e-5	1e-5	0.18684	1e-5	1e-5	1e-5	1e-5	NA	JU2575	14
0.058605	0.016903	0.249286	1.1e-5	1e-5	1e-5	1e-5	0.040606	1e-5	0.355013	0.279507	1e-5	1e-5	1e-5	NA	JU2576	14
1.6e-5	1e-5	1e-5	1e-5	1e-5	1e-5	0.394976	1e-5	1e-5	1e-5	0.604898	1e-5	1e-5	1e-5	NA	JU2578	14
0.100059	0.051076	0.080676	1e-5	1e-5	1e-5	0.346633	0.107639	1e-5	1e-5	1e-5	1e-5	1e-5	0.313837	NA	JU258	14
1e-5	1e-5	1e-5	1e-5	1e-5	1e-5	1e-5	1e-5	0.99987	1e-5	1e-5	1e-5	1e-5	1e-5	NA	JU2581	14
1e-5	1e-5	0.069659	1e-5	1e-5	1e-5	0.653933	0.25249	1e-5	1e-5	1e-5	1e-5	1e-5	0.023818	NA	JU2586	14
1e-5	1e-5	0.028493	1e-5	1e-5	0.03525	1e-5	0.435596	0.500561	1e-5	1e-5	1e-5	1e-5	1e-5	NA	JU2587	14
1e-5	0.789718	1e-5	1e-5	1e-5	1e-5	0.073005	1e-5	1e-5	0.103463	1e-5	1e-5	1e-5	0.033714	NA	JU2592	14
1e-5	1e-5	1e-5	1e-5	1e-5	1e-5	1e-5	0.282128	0.717752	1e-5	1e-5	1e-5	1e-5	1e-5	NA	JU2593	14
1e-5	1e-5	0.99987	1e-5	1e-5	1e-5	1e-5	1e-5	1e-5	1e-5	1e-5	1e-5	1e-5	1e-5	NA	JU2600	14
1e-5	1e-5	0.99987	1e-5	1e-5	1e-5	1e-5	1e-5	1e-5	1e-5	1e-5	1e-5	1e-5	1e-5	NA	JU2610	14
1e-5	1e-5	1e-5	1e-5	1e-5	0.141884	0.120748	1e-5	1e-5	1e-5	0.737258	1e-5	1e-5	1e-5	NA	JU2619	14
1e-5	0.41214	0.024354	1e-5	1e-5	1e-5	1e-5	0.295788	1e-5	0.267619	1e-5	1e-5	1e-5	1e-5	NA	JU2800	14
1e-5	1e-5	0.055567	1e-5	0.099294	1e-5	0.157966	1e-5	1e-5	1e-5	0.565215	1e-5	1e-5	0.121867	NA	JU2811	14
1e-5	0.914119	0.085761	1e-5	1e-5	1e-5	1e-5	1e-5	1e-5	1e-5	1e-5	1e-5	1e-5	1e-5	NA	JU2825	14
1e-5	1e-5	1e-5	1e-5	1e-5	1e-5	1e-5	1e-5	0.917303	1e-5	0.082577	1e-5	1e-5	1e-5	NA	JU2829	14
0.059361	1e-5	0.00851	1e-5	1e-5	0.037702	0.492934	0.050073	0.351341	1e-5	1e-5	1e-5	1e-5	1e-5	NA	JU2838	14
1e-5	1e-5	0.40543	1e-5	1e-5	1e-5	1e-5	0.219997	1e-5	1e-5	0.374463	1e-5	1e-5	1e-5	NA	JU2841	14
1e-5	0.289155	1e-5	1.1e-5	1e-5	1e-5	0.307341	0.028708	1e-5	1e-5	0.374695	1e-5	1e-5	1e-5	NA	JU2853	14
1e-5	1e-5	1e-5	1e-5	1e-5	0.451983	0.097061	0.389794	1e-5	0.061062	1e-5	1e-5	1e-5	1e-5	NA	JU2862	14
1e-5	1e-5	1e-5	1e-5	1e-5	0.99987	1e-5	1e-5	1e-5	1e-5	1e-5	1e-5	1e-5	1e-5	NA	JU2866	14
1e-5	1e-5	1e-5	1e-5	1e-5	0.146882	0.0474	1e-5	1e-5	1e-5	0.805608	1e-5	1e-5	1e-5	NA	JU2878	14
1e-5	1e-5	1e-5	1e-5	0.196176	0.26549	1e-5	1e-5	0.414995	1e-5	0.123239	1e-5	1e-5	1e-5	NA	JU2879	14
1e-5	0.19172	1e-5	1e-5	1e-5	1e-5	1e-5	0.556274	1e-5	0.185277	0.066629	1e-5	1e-5	1e-5	NA	JU2906	14
1e-5	0.558745	1e-5	1e-5	1e-5	1e-5	1e-5	0.197945	1e-5	1e-5	0.2432	1e-5	1e-5	1e-5	NA	JU2907	14
1e-5	1e-5	1e-5	1e-5	1e-5	1e-5	1e-5	0.621441	1e-5	0.378437	1e-5	1.1e-5	1e-5	1e-5	NA	JU310	14
1e-5	0.734218	1e-5	1e-5	1e-5	1e-5	1e-5	1e-5	0.021218	0.200616	0.043848	1e-5	1e-5	1e-5	NA	JU311	14
1e-5	0.167349	1e-5	1e-5	1e-5	1e-5	0.444613	0.233801	1e-5	1e-5	0.154137	1e-5	1e-5	1e-5	NA	JU3125	14
1e-5	0.197002	1e-5	1e-5	1e-5	1e-5	0.621288	1e-5	1e-5	1e-5	0.181599	1e-5	1e-5	1e-5	NA	JU3127	14
1e-5	1e-5	1e-5	1e-5	1e-5	1e-5	1e-5	0.693915	1e-5	0.127271	0.178704	1e-5	1e-5	1e-5	NA	JU3128	14
1e-5	1e-5	0.260009	1e-5	1e-5	1e-5	1e-5	0.168962	1e-5	0.570918	1e-5	1e-5	1e-5	1e-5	NA	JU3132	14
1e-5	1e-5	1e-5	1e-5	1e-5	1e-5	0.07417	0.531044	1e-5	0.102556	0.29213	1e-5	1e-5	1e-5	NA	JU3134	14
1e-5	1e-5	1e-5	1e-5	1e-5	1e-5	1e-5	1e-5	1e-5	1e-5	0.99987	1e-5	1e-5	1e-5	NA	JU3135	14
1e-5	0.067358	1e-5	1e-5	0.020089	1e-5	0.351658	0.098342	1e-5	0.417423	0.045051	1e-5	1e-5	1e-5	NA	JU3137	14
1e-5	1e-5	1e-5	1e-5	1e-5	1e-5	1e-5	1e-5	1e-5	0.99987	1e-5	1e-5	1e-5	1e-5	NA	JU3140	14
1e-5	1e-5	1e-5	1e-5	1e-5	1e-5	0.139309	0.189863	0.265112	0.120688	0.284939	1e-5	1e-5	1e-5	NA	JU3144	14
2e-5	1e-5	1e-5	1e-5	1e-5	1e-5	1e-5	1e-5	1e-5	0.527407	0.472463	1e-5	1e-5	1e-5	NA	JU323	14
1e-5	1e-5	1e-5	1e-5	1e-5	1e-5	1e-5	0.702378	1e-5	0.297502	1e-5	1e-5	1e-5	1e-5	NA	JU346	14
1e-5	1e-5	0.062959	1e-5	1e-5	1e-5	1e-5	0.579541	0.35739	1e-5	1e-5	1e-5	1e-5	1e-5	NA	JU360	14
1e-5	0.964073	1e-5	1e-5	1e-5	1e-5	1e-5	1e-5	1e-5	1e-5	0.035807	1e-5	1e-5	1e-5	NA	JU367	14
1e-5	0.057781	0.802371	1e-5	1e-5	1e-5	1e-5	0.139728	1e-5	2e-5	1e-5	1e-5	1e-5	1e-5	NA	JU393	14
1e-5	0.99987	1e-5	1e-5	1e-5	1e-5	1e-5	1e-5	1e-5	1e-5	1e-5	1e-5	1e-5	1e-5	NA	JU394	14
1e-5	0.199489	1e-5	1e-5	1e-5	1e-5	1e-5	1e-5	1e-5	0.800391	1e-5	1e-5	1e-5	1e-5	NA	JU397	14
1e-5	0.99987	1e-5	1e-5	1e-5	1e-5	1e-5	1e-5	1e-5	1e-5	1e-5	1e-5	1e-5	1e-5	NA	JU406	14
1e-5	0.64568	1e-5	1e-5	1e-5	1e-5	1e-5	1e-5	1e-5	0.175657	0.178552	1e-5	1e-5	1e-5	NA	JU440	14
1e-5	0.155796	1e-5	1e-5	1e-5	1e-5	1e-5	0.5113	1e-5	1e-5	0.332794	1e-5	1e-5	1e-5	NA	JU561	14
1e-5	1e-5	0.016276	1e-5	1e-5	1e-5	0.209565	0.544726	1e-5	0.135959	0.093384	1e-5	1e-5	1e-5	NA	JU642	14
1e-5	1e-5	1e-5	1e-5	1e-5	1e-5	1e-5	0.314015	0.685865	1e-5	1e-5	1e-5	1e-5	1e-5	NA	JU751	14
1e-5	1e-5	1e-5	1e-5	0.058937	1e-5	0.57462	0.174773	1e-5	1e-5	0.19157	1e-5	1e-5	1e-5	NA	JU774	14
1e-5	1e-5	1e-5	1e-5	1e-5	1e-5	1e-5	1e-5	1e-5	1e-5	1e-5	1e-5	1e-5	0.99987	NA	JU775	14
1e-5	1e-5	1e-5	1e-5	1e-5	1e-5	0.99987	1e-5	1e-5	1e-5	1e-5	1e-5	1e-5	1e-5	NA	JU778	14
1e-5	1e-5	1e-5	1e-5	1e-5	1e-5	0.531347	0.080834	1e-5	1e-5	1e-5	1e-5	1e-5	0.387709	NA	JU782	14
1e-5	1e-5	1e-5	1e-5	1e-5	1e-5	1e-5	1e-5	1e-5	0.99987	1e-5	1e-5	1e-5	1e-5	NA	JU792	14
1e-5	1e-5	1e-5	1e-5	1e-5	1e-5	1e-5	0.36966	0.361686	1e-5	0.268544	1e-5	1e-5	1e-5	NA	JU830	14
1e-5	0.134375	1e-5	1e-5	1e-5	1e-5	1e-5	1e-5	1e-5	0.657227	0.208289	1e-5	1e-5	1e-5	NA	JU847	14
1e-5	1e-5	1e-5	1e-5	1e-5	1e-5	0.110718	1e-5	0.151069	0.045558	0.692555	1e-5	1e-5	1e-5	NA	KR314	14
1e-5	1e-5	1e-5	1e-5	1e-5	1e-5	0.99987	1e-5	1e-5	1e-5	1e-5	1e-5	1e-5	1e-5	NA	LKC34	14
1e-5	0.99987	1e-5	1e-5	1e-5	1e-5	1e-5	1e-5	1e-5	1e-5	1e-5	1e-5	1e-5	1e-5	NA	LSJ1	14
1e-5	1e-5	1e-5	1e-5	1e-5	1e-5	0.483071	1e-5	1e-5	1e-5	0.516809	1e-5	1e-5	1e-5	NA	MY1	14
1e-5	1e-5	0.032175	1e-5	1e-5	1e-5	1e-5	1e-5	1e-5	0.151854	0.601395	1e-5	1e-5	0.214476	NA	MY10	14
1e-5	1e-5	1e-5	1e-5	0.016455	1e-5	1e-5	1e-5	0.983425	1e-5	1e-5	1e-5	1e-5	1e-5	NA	MY16	14
1e-5	1e-5	1e-5	1e-5	1e-5	1e-5	1e-5	1e-5	0.99987	1e-5	1e-5	1e-5	1e-5	1e-5	NA	MY18	14
1e-5	0.334944	1e-5	1e-5	1e-5	1e-5	1e-5	0.388969	1e-5	0.275978	1e-5	1e-5	1e-5	1e-5	NA	MY2147	14
1e-5	1e-5	1e-5	1e-5	1e-5	1e-5	1e-5	0.325529	0.105478	0.128428	0.440465	1e-5	1e-5	1e-5	NA	MY2212	14
1e-5	1e-5	1e-5	1e-5	0.464092	1e-5	1e-5	1e-5	0.535788	1e-5	1e-5	1e-5	1e-5	1e-5	NA	MY23	14
1e-5	0.453585	1e-5	1e-5	1e-5	1e-5	1.1e-5	1e-5	0.071724	0.350482	0.124108	1e-5	1e-5	1e-5	NA	MY2453	14
1e-5	1e-5	1e-5	1e-5	1e-5	1e-5	1e-5	0.777419	1e-5	1e-5	0.222461	1e-5	1e-5	1e-5	NA	MY2530	14
1e-5	1e-5	1e-5	1e-5	1e-5	1e-5	1e-5	0.99987	1e-5	1e-5	1e-5	1e-5	1e-5	1e-5	NA	MY2535	14
1e-5	0.28571	1e-5	1e-5	1e-5	1e-5	1e-5	0.174709	1e-5	0.539471	1e-5	1e-5	1e-5	1e-5	NA	MY2573	14
1e-5	1e-5	1e-5	1e-5	1e-5	1e-5	1e-5	1e-5	1e-5	1e-5	0.99987	1e-5	1e-5	1e-5	NA	MY2585	14
1e-5	1e-5	1e-5	1e-5	1e-5	1e-5	1e-5	1e-5	1e-5	1e-5	0.99987	1e-5	1e-5	1e-5	NA	MY2693	14
1e-5	1e-5	1e-5	1e-5	1e-5	1e-5	1e-5	1e-5	1e-5	1e-5	0.99987	1e-5	1e-5	1e-5	NA	MY2713	14
1e-5	1e-5	1e-5	1e-5	1e-5	1e-5	1e-5	1e-5	0.630338	1e-5	0.369542	1e-5	1e-5	1e-5	NA	MY2741	14
1e-5	1.4e-5	1e-5	1e-5	1e-5	0.383422	0.047281	1e-5	0.414349	1e-5	0.154842	1.2e-5	1e-5	1e-5	NA	MY518	14
1e-5	1e-5	1e-5	1e-5	1e-5	1e-5	0.08	1e-5	1e-5	1e-5	0.91988	1e-5	1e-5	1e-5	NA	MY679	14
1e-5	1e-5	1e-5	1e-5	1e-5	1e-5	1e-5	0.534819	1e-5	0.465061	1e-5	1e-5	1e-5	1e-5	NA	MY772	14
1e-5	1e-5	1e-5	1e-5	1e-5	1e-5	1e-5	1e-5	0.99987	1e-5	1e-5	1e-5	1e-5	1e-5	NA	MY795	14
1e-5	1e-5	1e-5	1e-5	1e-5	1e-5	1e-5	0.953196	1e-5	1e-5	0.046684	1e-5	1e-5	1e-5	NA	MY920	14
1e-5	0.99987	1e-5	1e-5	1e-5	1e-5	1e-5	1e-5	1e-5	1e-5	1e-5	1e-5	1e-5	1e-5	NA	N2	14
1e-5	1e-5	1e-5	1e-5	1e-5	1e-5	1e-5	0.018495	1e-5	0.447997	0.533398	1e-5	1e-5	1e-5	NA	NIC1	14
1e-5	0.304396	1e-5	1e-5	1e-5	1e-5	1e-5	0.186688	1e-5	0.508806	1e-5	1e-5	1e-5	1e-5	NA	NIC1049	14
1e-5	0.731223	1.3e-5	1e-5	1e-5	1e-5	1e-5	1e-5	1e-5	0.268654	1e-5	1e-5	1e-5	1e-5	NA	NIC1107	14
1e-5	0.009604	1e-5	1e-5	1.2e-5	1e-5	0.156776	0.235742	1e-5	0.338779	0.259007	1e-5	1e-5	1e-5	NA	NIC166	14
0.107814	0.098113	0.150835	1e-5	1e-5	1e-5	0.37957	0.020214	0.022725	1e-5	1e-5	1e-5	1e-5	0.220659	NA	NIC195	14
0.072509	1e-5	0.233746	1e-5	1e-5	1e-5	0.207097	1e-5	1e-5	0.041773	1e-5	1e-5	1e-5	0.444785	NA	NIC199	14
1e-5	0.50898	1e-5	1e-5	1e-5	1e-5	1e-5	1e-5	1e-5	1e-5	0.4909	1e-5	1e-5	1e-5	NA	NIC2	14
1e-5	0.053179	1e-5	1e-5	1e-5	1e-5	1e-5	0.207366	1e-5	0.274714	0.464641	1e-5	1e-5	1e-5	NA	NIC207	14
1e-5	1e-5	1e-5	1.1e-5	0.032184	1e-5	0.158073	1e-5	1e-5	1e-5	0.809631	1e-5	1e-5	1e-5	NA	NIC231	14
1e-5	1.1e-5	1e-5	1e-5	1e-5	1e-5	0.992957	1e-5	1e-5	0.006922	1e-5	1e-5	1e-5	1e-5	NA	NIC236	14
1e-5	0.382915	1e-5	1e-5	1e-5	1e-5	0.245337	0.217213	1e-5	0.154435	1e-5	1e-5	1e-5	1e-5	NA	NIC242	14
0.190655	0.085002	1e-5	1e-5	1e-5	1e-5	1e-5	1e-5	1e-5	1e-5	1e-5	1e-5	1e-5	0.724233	NA	NIC251	14
0.021534	1e-5	1.7e-5	1.1e-5	1.5e-5	1.1e-5	0.926313	0.052021	1.4e-5	1e-5	1e-5	1.3e-5	1e-5	1e-5	NA	NIC252	14
1e-5	0.23456	1e-5	1e-5	1e-5	1e-5	1e-5	0.292957	1e-5	0.095987	0.376397	1e-5	1e-5	1e-5	NA	NIC255	14
1.3e-5	1e-5	1e-5	1e-5	1e-5	1.3e-5	0.657321	1e-5	1e-5	1.9e-5	1e-5	1e-5	1e-5	0.342544	NA	NIC256	14
1e-5	1e-5	1e-5	1e-5	1e-5	1e-5	0.038329	1e-5	1e-5	1e-5	1e-5	1e-5	1e-5	0.961551	NA	NIC258	14
1e-5	0.11936	1e-5	1e-5	1e-5	1e-5	0.601158	0.003464	1e-5	0.172655	1e-5	1e-5	1e-5	0.103273	NA	NIC259	14
1e-5	1e-5	1e-5	1e-5	1e-5	1e-5	0.417612	1e-5	1e-5	1e-5	0.040374	1e-5	1e-5	0.541903	NA	NIC260	14
1e-5	1e-5	1e-5	1e-5	1e-5	1e-5	0.336738	1e-5	1e-5	1e-5	1e-5	1e-5	1e-5	0.663142	NA	NIC261	14
1e-5	1e-5	1e-5	1e-5	1e-5	1e-5	0.476208	1e-5	1e-5	1e-5	1e-5	1e-5	1e-5	0.523672	NA	NIC262	14
1e-5	1e-5	1e-5	1e-5	1e-5	1e-5	1e-5	1e-5	1e-5	1e-5	1e-5	1e-5	1e-5	0.99987	NA	NIC265	14
0.02211	0.257207	1e-5	1e-5	1e-5	1e-5	0.700825	1e-5	1e-5	1e-5	1e-5	1e-5	1e-5	0.019758	NA	NIC266	14
1e-5	1e-5	1e-5	1e-5	1e-5	1e-5	0.673463	1e-5	1e-5	1e-5	0.326417	1e-5	1e-5	1e-5	NA	NIC267	14
0.33432	1e-5	1e-5	1e-5	0.07054	1e-5	0.39269	1e-5	0.101285	1e-5	0.101076	1e-5	1e-5	1e-5	NA	NIC268	14
1e-5	1e-5	0.046205	1e-5	1e-5	1e-5	0.859195	1e-5	1e-5	0.09449	1e-5	1e-5	1e-5	1e-5	NA	NIC269	14
1e-5	1e-5	1e-5	1e-5	1e-5	1e-5	0.63067	1e-5	1e-5	1e-5	1e-5	1e-5	1e-5	0.36921	NA	NIC271	14
1e-5	1e-5	1e-5	1e-5	1e-5	1e-5	0.949819	1e-5	1e-5	0.050061	1e-5	1e-5	1e-5	1e-5	NA	NIC272	14
1e-5	1e-5	1e-5	1e-5	1e-5	1e-5	0.99987	1e-5	1e-5	1e-5	1e-5	1e-5	1e-5	1e-5	NA	NIC274	14
1e-5	1e-5	1e-5	1e-5	1e-5	1.5e-5	0.722194	1e-5	1e-5	1e-5	0.277681	1e-5	1e-5	1e-5	NA	NIC275	14
1e-5	1e-5	1e-5	1e-5	1e-5	1e-5	0.923235	1e-5	1e-5	1e-5	0.076644	1e-5	1e-5	1e-5	NA	NIC276	14
1e-5	1e-5	1e-5	1e-5	1e-5	1e-5	1e-5	0.623387	1e-5	0.376493	1e-5	1e-5	1e-5	1e-5	NA	NIC277	14
1e-5	1e-5	1e-5	1e-5	1e-5	0.025667	1e-5	0.378922	1e-5	0.441087	0.154224	1e-5	1e-5	1e-5	NA	NIC3	14
1e-5	1e-5	0.481895	1e-5	1e-5	1e-5	1e-5	1e-5	1e-5	0.517985	1e-5	1e-5	1e-5	1e-5	NA	NIC501	14
1e-5	1e-5	1e-5	1e-5	1e-5	1e-5	1e-5	0.853757	1e-5	0.146123	1e-5	1e-5	1e-5	1e-5	NA	NIC511	14
1e-5	1e-5	1e-5	1e-5	1e-5	1e-5	0.99987	1e-5	1e-5	1e-5	1e-5	1e-5	1e-5	1e-5	NA	NIC513	14
1e-5	1e-5	1e-5	1e-5	1e-5	1e-5	0.99987	1e-5	1e-5	1e-5	1e-5	1e-5	1e-5	1e-5	NA	NIC514	14
1e-5	1e-5	0.130305	1e-5	1e-5	1e-5	0.376045	0.493538	1e-5	1e-5	1e-5	1.2e-5	1e-5	1e-5	NA	NIC515	14
1e-5	0.040275	1e-5	1e-5	1e-5	1e-5	0.260538	0.699077	1e-5	1e-5	1e-5	1e-5	1e-5	1e-5	NA	NIC522	14
1e-5	1e-5	1e-5	1e-5	0.125137	1e-5	0.335871	0.052217	1e-5	1e-5	0.486675	1e-5	1e-5	1e-5	NA	NIC523	14
1e-5	1e-5	1e-5	1e-5	1e-5	1e-5	0.250808	0.641523	0.044324	0.063245	1e-5	1e-5	1e-5	1e-5	NA	NIC526	14
1e-5	1e-5	0.335687	1e-5	1e-5	1e-5	0.015968	0.527127	1e-5	0.121118	1e-5	1e-5	1e-5	1e-5	NA	NIC527	14
1e-5	1e-5	0.03516	1e-5	1e-5	1e-5	1e-5	0.766045	1e-5	1e-5	0.198685	1e-5	1e-5	1e-5	NA	NIC528	14
1e-5	0.104313	1e-5	1e-5	1e-5	1e-5	0.09605	0.53751	1e-5	1e-5	0.262027	1e-5	1e-5	1e-5	NA	NIC529	14
1e-5	1e-5	1e-5	1e-5	1e-5	0.092198	1e-5	1e-5	1e-5	1e-5	0.907682	1e-5	1e-5	1e-5	NA	PB303	14
1e-5	1e-5	1e-5	1e-5	1e-5	0.99987	1e-5	1e-5	1e-5	1e-5	1e-5	1e-5	1e-5	1e-5	NA	PB306	14
1e-5	1e-5	1e-5	1e-5	1e-5	0.99987	1e-5	1e-5	1e-5	1e-5	1e-5	1e-5	1e-5	1e-5	NA	PS2025	14
1e-5	0.282391	1e-5	1e-5	1e-5	1e-5	1e-5	0.348113	1e-5	1e-5	0.369387	1e-5	1e-5	1e-5	NA	PX179	14
1e-5	1e-5	0.092449	1e-5	1e-5	0.142209	0.150668	0.290494	0.30646	1e-5	1e-5	1e-5	1e-5	0.017639	NA	QG2075	14
1e-5	1e-5	1e-5	1e-5	1e-5	0.081066	0.239458	0.187775	1e-5	1e-5	0.491601	1e-5	1e-5	1e-5	NA	QG536	14
1e-5	1e-5	1e-5	1e-5	0.139125	0.860755	1e-5	1e-5	1e-5	1e-5	1e-5	1e-5	1e-5	1e-5	NA	QG556	14
1e-5	1e-5	1e-5	1e-5	1e-5	0.99987	1e-5	1e-5	1e-5	1e-5	1e-5	1e-5	1e-5	1e-5	NA	QG557	14
1e-5	1e-5	0.213785	1e-5	1e-5	1e-5	0.007181	0.295372	1e-5	1e-5	0.296139	0.0497	1e-5	0.137743	NA	QW947	14
1e-5	1e-5	1e-5	1e-5	1e-5	1e-5	1e-5	1e-5	1e-5	1e-5	1e-5	0.99987	1e-5	1e-5	NA	QX1211	14
1e-5	1e-5	1e-5	1e-5	1e-5	0.788752	1e-5	1e-5	0.211128	1e-5	1e-5	1e-5	1e-5	1e-5	NA	QX1212	14
1e-5	1e-5	1e-5	1e-5	1e-5	0.785878	1e-5	1e-5	1e-5	1e-5	0.214002	1e-5	1e-5	1e-5	NA	QX1233	14
0.554703	0.066695	1e-5	1e-5	0.060857	0.122177	1e-5	0.138847	0.056642	1e-5	1e-5	1e-5	1e-5	1e-5	NA	QX1791	14
1e-5	1e-5	1e-5	1e-5	0.618767	1e-5	0.157369	0.022215	1e-5	1e-5	0.201549	1e-5	1e-5	1e-5	NA	QX1792	14
1e-5	1e-5	1e-5	1e-5	0.869993	1e-5	0.129879	1e-5	1e-5	1e-5	1e-5	1.7e-5	1e-5	1e-5	NA	QX1793	14
1e-5	1e-5	1e-5	1e-5	0.859051	0.104461	1e-5	1e-5	1e-5	1e-5	0.036378	1e-5	1e-5	1e-5	NA	QX1794	14
1e-5	1e-5	1e-5	1e-5	1e-5	1e-5	1e-5	1e-5	1e-5	1e-5	0.99987	1e-5	1e-5	1e-5	NA	RC301	14
1e-5	1e-5	0.089133	1e-5	1e-5	1e-5	1e-5	0.170832	0.507469	1e-5	1e-5	1e-5	1e-5	0.232465	NA	WN2001	14
1e-5	0.185149	0.071842	1e-5	1e-5	1e-5	0.067377	0.368943	1e-5	1e-5	0.252086	1e-5	1e-5	0.054524	NA	WN2002	14
1e-5	1e-5	1e-5	1e-5	1e-5	1e-5	1e-5	0.193859	0.469728	1e-5	0.336302	1e-5	1e-5	1e-5	NA	WN2033	14
1e-5	0.309295	0.69058	1e-5	1e-5	1e-5	1e-5	1e-5	1.4e-5	1e-5	1e-5	1e-5	1e-5	1e-5	NA	WN2050	14
1e-5	1e-5	1e-5	1e-5	0.839795	0.160085	1e-5	1e-5	1e-5	1e-5	1e-5	1e-5	1e-5	1e-5	NA	XZ1513	14
1e-5	1e-5	1e-5	1.6e-5	1e-5	1e-5	1e-5	1e-5	1e-5	1e-5	1e-5	0.999864	1e-5	1e-5	NA	XZ1514	14
1e-5	1e-5	1e-5	1e-5	0.456091	0.399557	1e-5	1e-5	1e-5	1e-5	1e-5	1e-5	0.144241	1e-5	NA	XZ1515	14
1e-5	1e-5	1e-5	1e-5	1e-5	1e-5	1e-5	1e-5	1e-5	1e-5	1e-5	0.438437	0.528894	0.032559	NA	XZ1516	14
1e-5	1e-5	1e-5	0.561157	1e-5	1e-5	1e-5	1e-5	1e-5	1e-5	1e-5	1e-5	0.438733	NA	NA	AB1	13
1e-5	1e-5	1e-5	0.99988	1e-5	1e-5	1e-5	1e-5	1e-5	1e-5	1e-5	1e-5	1e-5	NA	NA	BRC20067	13
0.329502	1e-5	1e-5	0.474219	1e-5	1e-5	1e-5	1e-5	1e-5	1e-5	1e-5	0.196179	1e-5	NA	NA	BRC20263	13
1e-5	1.9e-5	1e-5	1e-5	1e-5	1e-5	1e-5	1e-5	1e-5	1e-5	1e-5	1e-5	0.999871	NA	NA	CB4851	13
1e-5	1e-5	1e-5	0.808205	1e-5	1e-5	1e-5	1e-5	1e-5	1e-5	1e-5	1e-5	0.191685	NA	NA	CB4852	13
1e-5	1e-5	0.765054	0.234836	1e-5	1e-5	1e-5	1e-5	1e-5	1e-5	1e-5	1e-5	1e-5	NA	NA	CB4853	13
0.429802	1e-5	0.027223	0.542872	1e-5	1e-5	1e-5	1e-5	1.3e-5	1e-5	1e-5	1e-5	1e-5	NA	NA	CB4854	13
1e-5	1e-5	0.88728	0.11261	1e-5	1e-5	1e-5	1e-5	1e-5	1e-5	1e-5	1e-5	1e-5	NA	NA	CB4855	13
1e-5	1e-5	1e-5	1e-5	1e-5	1e-5	1e-5	1e-5	1e-5	0.99988	1e-5	1e-5	1e-5	NA	NA	CB4856	13
1e-5	1e-5	0.99988	1e-5	1e-5	1e-5	1e-5	1e-5	1e-5	1e-5	1e-5	1e-5	1e-5	NA	NA	CB4857	13
1e-5	1e-5	0.99988	1e-5	1e-5	1e-5	1e-5	1e-5	1e-5	1e-5	1e-5	1e-5	1e-5	NA	NA	CB4858	13
1e-5	1e-5	1e-5	1e-5	1e-5	1e-5	1e-5	1e-5	1e-5	1e-5	0.395483	1e-5	0.604407	NA	NA	CB4932	13
0.174576	1e-5	0.663216	1e-5	1e-5	1e-5	0.162108	1e-5	1e-5	1e-5	1e-5	1e-5	1e-5	NA	NA	CX11254	13
1e-5	1e-5	0.908173	1.3e-5	1e-5	1e-5	1e-5	1e-5	0.091714	1e-5	1e-5	1e-5	1e-5	NA	NA	CX11262	13
1e-5	1e-5	0.99988	1e-5	1e-5	1e-5	1e-5	1e-5	1e-5	1e-5	1e-5	1e-5	1e-5	NA	NA	CX11264	13
0.436478	1e-5	0.454874	0.108548	1e-5	1e-5	1e-5	1e-5	1e-5	1e-5	1e-5	1e-5	1e-5	NA	NA	CX11271	13
0.192735	1e-5	0.630656	0.089087	1e-5	1e-5	0.060812	1e-5	1e-5	1e-5	1e-5	1e-5	0.02663	NA	NA	CX11276	13
0.34266	1e-5	0.378104	1e-5	1e-5	1e-5	1e-5	1e-5	0.279136	1e-5	1e-5	1e-5	1e-5	NA	NA	CX11285	13
1e-5	1e-5	0.877795	0.122095	1e-5	1e-5	1e-5	1e-5	1e-5	1e-5	1e-5	1e-5	1e-5	NA	NA	CX11292	13
0.015072	1e-5	0.643226	0.018709	1e-5	0.053433	0.201184	1e-5	1e-5	1e-5	0.068306	1e-5	1e-5	NA	NA	CX11307	13
1e-5	1e-5	0.99988	1e-5	1e-5	1e-5	1e-5	1e-5	1e-5	1e-5	1e-5	1e-5	1e-5	NA	NA	CX11314	13
1e-5	1e-5	0.840749	0.091595	1e-5	1e-5	1e-5	1e-5	1e-5	1e-5	1e-5	0.067556	1e-5	NA	NA	CX11315	13
0.015835	1e-5	1e-5	0.117388	1e-5	1e-5	0.156557	1e-5	1e-5	1e-5	0.71013	1e-5	1e-5	NA	NA	DL200	13
0.083416	1e-5	0.74492100000000006	0.072929	1e-5	1e-5	1e-5	1e-5	0.044508	1e-5	1e-5	1e-5	0.054146	NA	NA	DL226	13
1e-5	1e-5	1e-5	1.2e-5	1e-5	1e-5	1e-5	1e-5	1e-5	0.999878	1e-5	1e-5	1e-5	NA	NA	DL238	13
1e-5	1e-5	1e-5	1e-5	1e-5	1e-5	1e-5	1e-5	0.99988	1e-5	1e-5	1e-5	1e-5	NA	NA	ECA189	13
1e-5	1.3e-5	1e-5	1e-5	1e-5	1e-5	1e-5	0.999877	1e-5	1e-5	1e-5	1e-5	1e-5	NA	NA	ECA191	13
1e-5	1e-5	1e-5	1e-5	1e-5	1e-5	1e-5	1e-5	1e-5	1e-5	1e-5	1e-5	0.99988	NA	NA	ECA252	13
1e-5	0.99987	1e-5	1e-5	1e-5	1e-5	1e-5	2e-5	1e-5	1e-5	1e-5	1e-5	1e-5	NA	NA	ECA347	13
1e-5	1e-5	0.43978	1e-5	1e-5	1e-5	1e-5	1e-5	0.56011	1e-5	1e-5	1e-5	1e-5	NA	NA	ECA348	13
1e-5	1e-5	0.839326	1e-5	1e-5	1e-5	1e-5	1e-5	1e-5	1.1e-5	1e-5	0.160563	1e-5	NA	NA	ECA349	13
1e-5	0.999866	1e-5	1e-5	1e-5	1e-5	1e-5	1e-5	1.5e-5	1e-5	1.9e-5	1e-5	1e-5	NA	NA	ECA36	13
1e-5	0.99988	1e-5	1e-5	1e-5	1e-5	1e-5	1e-5	1e-5	1e-5	1e-5	1e-5	1e-5	NA	NA	ECA363	13
1e-5	1e-5	1e-5	1e-5	1e-5	1e-5	1e-5	1e-5	1e-5	0.99988	1e-5	1e-5	1e-5	NA	NA	ECA369	13
1e-5	1e-5	1e-5	1e-5	1e-5	1e-5	1e-5	1e-5	0.99988	1e-5	1e-5	1e-5	1e-5	NA	NA	ECA372	13
1e-5	1e-5	1e-5	1e-5	1e-5	1e-5	1e-5	0.99988	1e-5	1e-5	1e-5	1e-5	1e-5	NA	NA	ECA396	13
1e-5	0.582449	1e-5	1e-5	1e-5	0.017868	1e-5	0.160176	1e-5	0.239417	1e-5	1e-5	1e-5	NA	NA	ECA701	13
1e-5	1e-5	1e-5	1e-5	1e-5	1e-5	1e-5	1e-5	1e-5	0.99988	1e-5	1e-5	1e-5	NA	NA	ECA703	13
1e-5	1e-5	1e-5	1e-5	1e-5	1e-5	1e-5	1e-5	0.99988	1e-5	1e-5	1e-5	1e-5	NA	NA	ECA705	13
1e-5	1e-5	1e-5	1e-5	1e-5	1e-5	1e-5	1e-5	1e-5	0.99988	1e-5	1e-5	1e-5	NA	NA	ECA706	13
1e-5	1e-5	1e-5	1e-5	1e-5	1e-5	1e-5	1e-5	0.99988	1e-5	1e-5	1e-5	1e-5	NA	NA	ECA710	13
1e-5	1e-5	1e-5	1e-5	0.779305	1e-5	1e-5	1e-5	0.220585	1e-5	1e-5	1e-5	1e-5	NA	NA	ECA712	13
1e-5	1e-5	1e-5	1e-5	1e-5	1e-5	1e-5	0.99988	1e-5	1e-5	1e-5	1e-5	1e-5	NA	NA	ECA722	13
1e-5	1e-5	1e-5	1e-5	1.7e-5	2e-5	1e-5	0.999861	1.2e-5	1e-5	1e-5	1e-5	1e-5	NA	NA	ECA723	13
1e-5	0.990206	0.009684	1e-5	1e-5	1e-5	1e-5	1e-5	1e-5	1e-5	1e-5	1e-5	1e-5	NA	NA	ECA724	13
1e-5	1e-5	1e-5	1e-5	1.9e-5	1e-5	1e-5	0.999865	1.7e-5	1e-5	1e-5	1e-5	1e-5	NA	NA	ECA730	13
1e-5	1e-5	1e-5	1e-5	1e-5	1e-5	1e-5	1.3e-5	1e-5	0.999877	1e-5	1e-5	1e-5	NA	NA	ECA732	13
1e-5	1e-5	1e-5	1e-5	1e-5	1e-5	1e-5	1e-5	1e-5	0.99988	1e-5	1e-5	1e-5	NA	NA	ECA733	13
1e-5	1e-5	1e-5	1e-5	1e-5	1e-5	1e-5	1e-5	0.99988	1e-5	1e-5	1e-5	1e-5	NA	NA	ECA738	13
1e-5	0.999864	1.8e-5	1e-5	1e-5	1e-5	1e-5	1e-5	1e-5	1e-5	1.9e-5	1e-5	1e-5	NA	NA	ECA740	13
1e-5	0.999877	1e-5	1e-5	1.2e-5	1e-5	1e-5	1e-5	1e-5	1.1e-5	1e-5	1e-5	1e-5	NA	NA	ECA741	13
1e-5	0.99988	1e-5	1e-5	1e-5	1e-5	1e-5	1e-5	1e-5	1e-5	1e-5	1e-5	1e-5	NA	NA	ECA742	13
1e-5	1e-5	1e-5	1e-5	1e-5	1e-5	1e-5	1e-5	0.900305	1e-5	0.062538	1e-5	0.037057	NA	NA	ECA743	13
1e-5	1e-5	1e-5	1e-5	1e-5	1e-5	1e-5	0.99988	1e-5	1e-5	1e-5	1e-5	1e-5	NA	NA	ECA744	13
1e-5	1e-5	1.6e-5	1e-5	1e-5	1e-5	1e-5	0.999874	1e-5	1e-5	1e-5	1e-5	1e-5	NA	NA	ECA745	13
1e-5	1e-5	1e-5	1e-5	1e-5	1e-5	1e-5	0.99988	1e-5	1e-5	1e-5	1e-5	1e-5	NA	NA	ECA746	13
1e-5	1e-5	1e-5	1e-5	0.99988	1e-5	1e-5	1e-5	1e-5	1e-5	1e-5	1e-5	1e-5	NA	NA	ECA760	13
1e-5	1e-5	1e-5	1e-5	0.99988	1e-5	1e-5	1e-5	1e-5	1e-5	1e-5	1e-5	1e-5	NA	NA	ECA768	13
1e-5	1e-5	1e-5	1e-5	0.99988	1e-5	1e-5	1e-5	1e-5	1e-5	1e-5	1e-5	1e-5	NA	NA	ECA777	13
1e-5	1e-5	1e-5	1e-5	0.999878	1e-5	1e-5	1e-5	1.1e-5	1.1e-5	1e-5	1e-5	1e-5	NA	NA	ECA778	13
1e-5	1e-5	1e-5	1e-5	0.99988	1e-5	1e-5	1e-5	1e-5	1e-5	1e-5	1e-5	1e-5	NA	NA	ECA807	13
1e-5	1e-5	1e-5	1e-5	0.99988	1e-5	1e-5	1e-5	1e-5	1e-5	1e-5	1e-5	1e-5	NA	NA	ECA812	13
1e-5	1e-5	0.45417	1e-5	1e-5	1e-5	0.54572	1e-5	1e-5	1e-5	1e-5	1e-5	1e-5	NA	NA	ED3005	13
0.13754	1e-5	0.495012	0.140739	1e-5	1e-5	0.22661799999999999	1e-5	1e-5	1e-5	1e-5	1e-5	1e-5	NA	NA	ED3011	13
1e-5	1e-5	1e-5	0.289492	1.5e-5	1.6e-5	1e-5	1e-5	1e-5	1e-5	1e-5	1e-5	0.710387	NA	NA	ED3012	13
1e-5	1e-5	1e-5	0.534981	1e-5	1e-5	1e-5	1e-5	1e-5	1e-5	0.464909	1e-5	1e-5	NA	NA	ED3017	13
0.713691	1e-5	1e-5	0.286199	1e-5	1e-5	1e-5	1e-5	1e-5	1e-5	1e-5	1e-5	1e-5	NA	NA	ED3040	13
0.297714	1e-5	1e-5	0.1231	1e-5	1e-5	0.579086	1e-5	1e-5	1e-5	1e-5	1e-5	1e-5	NA	NA	ED3046	13
0.307558	1e-5	1e-5	0.692332	1e-5	1e-5	1e-5	1e-5	1e-5	1e-5	1e-5	1e-5	1e-5	NA	NA	ED3048	13
0.297282	1e-5	1e-5	0.108611	1e-5	1e-5	0.594007	1e-5	1e-5	1e-5	1e-5	1e-5	1e-5	NA	NA	ED3049	13
0.73403	1e-5	1e-5	0.26586	1e-5	1e-5	1e-5	1e-5	1e-5	1e-5	1e-5	1e-5	1e-5	NA	NA	ED3052	13
0.028678	1e-5	1e-5	0.925189	1e-5	1e-5	0.046033	1e-5	1e-5	1e-5	1e-5	1e-5	1e-5	NA	NA	ED3073	13
0.187631	1e-5	1e-5	0.775263	1e-5	0.001076	1e-5	1e-5	1e-5	1e-5	0.035941	1e-5	1e-5	NA	NA	ED3077	13
1e-5	1e-5	0.066231	0.686212	1e-5	1e-5	1e-5	1e-5	1e-5	1e-5	1e-5	1e-5	0.247457	NA	NA	EG4347	13
1e-5	1e-5	1e-5	1e-5	1e-5	1e-5	0.998367	1e-5	1e-5	1e-5	0.001523	1e-5	1e-5	NA	NA	EG4349	13
0.645259	1e-5	1e-5	0.091114	1e-5	1e-5	0.185185	1e-5	1e-5	1e-5	0.038331	1e-5	0.04003	NA	NA	EG4724	13
0.613607	1e-5	1e-5	0.07731	1e-5	0.225343	0.083651	1e-5	1e-5	1e-5	1e-5	1e-5	1e-5	NA	NA	EG4725	13
1e-5	1e-5	0.509097	0.467846	1e-5	1.3e-5	1e-5	1e-5	1e-5	1e-5	1e-5	1e-5	0.022955	NA	NA	EG4946	13
0.096902	1e-5	1e-5	0.902988	1e-5	1e-5	1e-5	1e-5	1e-5	1e-5	1e-5	1e-5	1e-5	NA	NA	GXW1	13
0.0225	1e-5	1e-5	0.7002	1e-5	1e-5	1e-5	1e-5	1e-5	1e-5	0.135996	1e-5	0.141215	NA	NA	JT11398	13
0.195723	1e-5	1e-5	0.804167	1e-5	1e-5	1e-5	1e-5	1e-5	1e-5	1e-5	1e-5	1e-5	NA	NA	JU1088	13
1e-5	1e-5	0.912753	0.087137	1e-5	1e-5	1e-5	1e-5	1e-5	1e-5	1e-5	1e-5	1e-5	NA	NA	JU1172	13
1e-5	1e-5	1e-5	0.328601	1e-5	1e-5	1e-5	1e-5	1e-5	1e-5	1e-5	1e-5	0.671289	NA	NA	JU1200	13
1e-5	1e-5	1e-5	1e-5	1e-5	1e-5	1e-5	1e-5	1e-5	0.07359	0.200873	1e-5	0.725437	NA	NA	JU1212	13
1e-5	1e-5	1e-5	1e-5	1e-5	1e-5	1e-5	1e-5	1e-5	1e-5	0.99988	1e-5	1e-5	NA	NA	JU1213	13
1e-5	1e-5	1e-5	1e-5	1e-5	1e-5	1e-5	1e-5	1e-5	1e-5	0.99988	1e-5	1e-5	NA	NA	JU1242	13
1e-5	1e-5	1e-5	1e-5	1.5e-5	1e-5	1e-5	1e-5	1e-5	1e-5	0.751571	1e-5	0.248314	NA	NA	JU1246	13
1e-5	1e-5	1e-5	1e-5	1e-5	1e-5	1e-5	1e-5	1e-5	1.1e-5	1e-5	1e-5	0.999879	NA	NA	JU1249	13
1e-5	1e-5	1e-5	0.7636	1e-5	1e-5	1e-5	1e-5	1e-5	1e-5	1e-5	1e-5	0.23629	NA	NA	JU1395	13
0.211125	1e-5	1e-5	1e-5	1e-5	1e-5	0.507469	1e-5	1e-5	1e-5	0.281306	1e-5	1e-5	NA	NA	JU1400	13
0.235916	1e-5	1e-5	0.240231	1e-5	1e-5	0.467435	1e-5	1e-5	1e-5	1e-5	1e-5	0.056328	NA	NA	JU1409	13
0.127686	1e-5	1e-5	0.674233	1e-5	1e-5	1e-5	1e-5	1e-5	1e-5	0.192278	1e-5	0.005713	NA	NA	JU1440	13
0.664946	1e-5	1e-5	1e-5	1e-5	1e-5	1e-5	1e-5	1e-5	1e-5	0.334944	1e-5	1e-5	NA	NA	JU1491	13
1e-5	1e-5	1e-5	0.385524	1e-5	1e-5	0.026291	1e-5	1e-5	1e-5	0.588086	1e-5	1e-5	NA	NA	JU1530	13
1e-5	1e-5	1e-5	0.367639	1e-5	1e-5	1e-5	1e-5	1e-5	1e-5	1.1e-5	1e-5	0.63225	NA	NA	JU1543	13
1e-5	1e-5	1e-5	1e-5	1e-5	1e-5	1e-5	1e-5	1e-5	1e-5	1e-5	1e-5	0.99988	NA	NA	JU1568	13
1e-5	1e-5	1e-5	1e-5	1e-5	1e-5	1e-5	1e-5	1e-5	1e-5	0.99988	1e-5	1e-5	NA	NA	JU1580	13
1e-5	1e-5	1e-5	0.205112	1e-5	1e-5	1e-5	1e-5	1e-5	0.051357	0.672213	1e-5	0.071228	NA	NA	JU1581	13
1e-5	1e-5	1e-5	0.148731	1e-5	1e-5	1e-5	1.1e-5	1e-5	1.2e-5	1e-5	1e-5	0.851156	NA	NA	JU1586	13
0.030234	1e-5	1e-5	0.413901	1e-5	0.00977	0.185364	1e-5	1e-5	1e-5	1e-5	1e-5	0.360651	NA	NA	JU1652	13
1e-5	1e-5	1e-5	1e-5	1e-5	1e-5	0.075159	1e-5	1e-5	1e-5	0.909079	1e-5	0.015662	NA	NA	JU1666	13
0.017367	1e-5	1e-5	1e-5	1e-5	1e-5	1e-5	1e-5	1e-5	1e-5	0.298238	1e-5	0.684295	NA	NA	JU1792	13
1e-5	1e-5	1e-5	1e-5	1e-5	1e-5	1e-5	1e-5	1e-5	1.7e-5	0.999872	1.1e-5	1e-5	NA	NA	JU1793	13
1e-5	1e-5	1e-5	1e-5	1e-5	1e-5	0.672408	1e-5	1e-5	1e-5	0.123339	1e-5	0.204153	NA	NA	JU1808	13
1e-5	1e-5	1e-5	0.316395	1e-5	1e-5	1e-5	1e-5	1e-5	0.028483	1e-5	1e-5	0.655022	NA	NA	JU1896	13
1e-5	1e-5	1e-5	1e-5	1e-5	1e-5	1e-5	1e-5	1e-5	1e-5	0.899827	1e-5	0.100063	NA	NA	JU1934	13
0.261461	1e-5	1e-5	1e-5	1e-5	1e-5	1e-5	1e-5	1e-5	0.204196	0.503437	1e-5	0.030816	NA	NA	JU2001	13
0.179309	1e-5	1e-5	0.37199	1e-5	1e-5	0.273261	1e-5	1e-5	1e-5	0.17535	1e-5	1e-5	NA	NA	JU2007	13
1e-5	1e-5	0.859627	0.140263	1e-5	1e-5	1e-5	1e-5	1e-5	1e-5	1e-5	1e-5	1e-5	NA	NA	JU2016	13
0.065538	1e-5	0.377744	0.284713	1e-5	1e-5	0.018812	1e-5	1e-5	0.00828	1e-5	0.180142	0.064711	NA	NA	JU2017	13
1e-5	1e-5	1e-5	1e-5	1e-5	1e-5	1e-5	1e-5	1e-5	1e-5	0.852787	1e-5	0.147103	NA	NA	JU2106	13
0.14658	1e-5	1e-5	1e-5	1e-5	1e-5	1e-5	1e-5	1e-5	1e-5	0.8184	1e-5	0.034921	NA	NA	JU2131	13
1e-5	1e-5	1e-5	1e-5	1e-5	1.4e-5	1e-5	1e-5	1e-5	1e-5	0.779876	1e-5	0.220009	NA	NA	JU2141	13
0.03681	1e-5	1e-5	0.396368	1e-5	0.015637	1e-5	1e-5	1e-5	0.005159	1e-5	1e-5	0.545946	NA	NA	JU2234	13
1e-5	1e-5	1e-5	1e-5	1e-5	1e-5	1e-5	1e-5	1e-5	1e-5	0.99988	1e-5	1e-5	NA	NA	JU2250	13
1e-5	1e-5	1e-5	1e-5	1e-5	1e-5	1e-5	1e-5	1e-5	1e-5	1e-5	1e-5	0.99988	NA	NA	JU2257	13
1e-5	1e-5	1e-5	1e-5	1e-5	0.99988	1e-5	1e-5	1e-5	1e-5	1e-5	1e-5	1e-5	NA	NA	JU2316	13
0.226222	1e-5	1e-5	0.58146	1e-5	1e-5	0.072892	1e-5	1e-5	1e-5	0.119336	1e-5	1e-5	NA	NA	JU2464	13
1e-5	1e-5	1e-5	0.99988	1e-5	1e-5	1e-5	1e-5	1e-5	1e-5	1e-5	1e-5	1e-5	NA	NA	JU2466	13
1e-5	1e-5	0.414883	0.211689	1e-5	1e-5	1.1e-5	1e-5	1e-5	1e-5	0.373327	1e-5	1e-5	NA	NA	JU2478	13
0.022543	1e-5	1e-5	0.831105	1e-5	1e-5	0.078932	1e-5	1e-5	1e-5	1e-5	1e-5	0.06733	NA	NA	JU2513	13
0.340281	1e-5	1e-5	1e-5	1e-5	0.659609	1e-5	1e-5	1e-5	1e-5	1e-5	1e-5	1e-5	NA	NA	JU2519	13
0.99988	1e-5	1e-5	1e-5	1e-5	1e-5	1e-5	1e-5	1e-5	1e-5	1e-5	1e-5	1e-5	NA	NA	JU2522	13
1e-5	1e-5	1e-5	1e-5	1e-5	0.99988	1e-5	1e-5	1e-5	1e-5	1e-5	1e-5	1e-5	NA	NA	JU2526	13
1e-5	1e-5	1e-5	0.550075	1e-5	1e-5	1e-5	1e-5	1e-5	1e-5	0.449815	1e-5	1e-5	NA	NA	JU2534	13
1e-5	1e-5	1e-5	1e-5	1e-5	1e-5	1e-5	1e-5	1e-5	1e-5	1e-5	1e-5	0.99988	NA	NA	JU2565	13
1e-5	1e-5	1e-5	0.11682	1e-5	1e-5	1e-5	1e-5	1e-5	1e-5	0.104887	1e-5	0.778193	NA	NA	JU2566	13
1e-5	1e-5	1e-5	1e-5	1e-5	1e-5	1e-5	1e-5	1e-5	1e-5	0.99988	1e-5	1e-5	NA	NA	JU2570	13
1e-5	1e-5	1e-5	1e-5	1e-5	1e-5	1e-5	1e-5	1e-5	1e-5	0.288081	1e-5	0.711809	NA	NA	JU2572	13
1e-5	1e-5	1e-5	1e-5	1e-5	1e-5	1e-5	1e-5	1e-5	1e-5	0.157097	1e-5	0.842793	NA	NA	JU2575	13
1e-5	1e-5	1e-5	0.340991	1e-5	1e-5	1e-5	1e-5	1e-5	0.079481	0.567816	0.006924	0.004709	NA	NA	JU2576	13
0.508301	1e-5	0.006245	0.485354	1e-5	1e-5	1e-5	1e-5	1e-5	1e-5	1e-5	1e-5	1e-5	NA	NA	JU2578	13
0.341737	1e-5	1e-5	1e-5	1e-5	0.328616	0.063389	1e-5	1e-5	0.113799	0.086463	1e-5	0.065925	NA	NA	JU258	13
1e-5	1e-5	1e-5	1e-5	1e-5	1e-5	0.682681	1e-5	1e-5	1e-5	1e-5	0.317209	1e-5	NA	NA	JU2581	13
0.723775	1e-5	1e-5	0.143872	1e-5	0.04603	1e-5	1e-5	1e-5	1e-5	0.086233	1e-5	1e-5	NA	NA	JU2586	13
1e-5	1e-5	1e-5	1e-5	1e-5	1e-5	0.99988	1e-5	1e-5	1e-5	1e-5	1e-5	1e-5	NA	NA	JU2587	13
0.070073	1e-5	1e-5	1e-5	1e-5	0.030032	1e-5	1.1e-5	1e-5	1e-5	0.074426	1e-5	0.825378	NA	NA	JU2592	13
1e-5	1e-5	1e-5	1e-5	1e-5	1e-5	0.845387	1e-5	1e-5	1e-5	1e-5	0.154503	1e-5	NA	NA	JU2593	13
1e-5	1e-5	1e-5	1e-5	1e-5	1e-5	1e-5	1e-5	1e-5	1e-5	0.99988	1e-5	1e-5	NA	NA	JU2600	13
1e-5	1e-5	1e-5	1e-5	1e-5	1e-5	1e-5	1e-5	1e-5	1e-5	0.99988	1e-5	1e-5	NA	NA	JU2610	13
0.091501	1e-5	0.22438	0.579046	1e-5	1e-5	0.104983	1e-5	1e-5	1e-5	1e-5	1e-5	1e-5	NA	NA	JU2619	13
1e-5	1e-5	1e-5	0.156464	1e-5	1e-5	1e-5	1e-5	1e-5	1e-5	0.377482	1e-5	0.465954	NA	NA	JU2800	13
0.312548	1e-5	1e-5	0.35897	1e-5	0.023137	1e-5	1e-5	1.1e-5	1e-5	1e-5	0.305254	1e-5	NA	NA	JU2811	13
1e-5	1e-5	1e-5	1e-5	1e-5	1e-5	1e-5	1e-5	1e-5	1e-5	1e-5	1e-5	0.99988	NA	NA	JU2825	13
1e-5	1e-5	1e-5	1e-5	1e-5	1e-5	0.821162	1e-5	1e-5	1e-5	1e-5	0.178728	1e-5	NA	NA	JU2829	13
0.549147	1e-5	0.085273	0.018818	1e-5	1e-5	1e-5	1e-5	1e-5	1e-5	0.019181	0.327501	1e-5	NA	NA	JU2838	13
1e-5	1e-5	1e-5	0.280457	1e-5	1e-5	0.46633	1e-5	1e-5	1e-5	0.253113	1e-5	1e-5	NA	NA	JU2841	13
0.367843	1e-5	1e-5	0.376351	1e-5	1e-5	1e-5	1e-5	1e-5	1e-5	1e-5	1e-5	0.255706	NA	NA	JU2853	13
0.125732	1e-5	0.508534	0.002481	1e-5	0.014777	0.223033	1e-5	1e-5	1e-5	0.114289	1e-5	0.011094	NA	NA	JU2862	13
1e-5	1e-5	0.760985	1e-5	1e-5	1e-5	1e-5	1e-5	1e-5	1e-5	1e-5	0.238905	1e-5	NA	NA	JU2866	13
0.123233	1e-5	0.08669	0.665055	1e-5	1e-5	1e-5	1e-5	1e-5	1e-5	1e-5	0.124933	1e-5	NA	NA	JU2878	13
1e-5	1e-5	0.168806	0.183789	1e-5	1e-5	1e-5	1e-5	1e-5	1e-5	1e-5	0.647305	1e-5	NA	NA	JU2879	13
1e-5	1e-5	1e-5	0.526975	1e-5	1e-5	1e-5	1e-5	1e-5	1e-5	0.27053	1e-5	0.202395	NA	NA	JU2906	13
1e-5	1e-5	1e-5	0.486278	1e-5	1e-5	1e-5	1e-5	1e-5	1e-5	1e-5	1e-5	0.513612	NA	NA	JU2907	13
1e-5	1e-5	1e-5	0.405455	1e-5	1e-5	1e-5	1e-5	1e-5	1e-5	0.594435	1e-5	1e-5	NA	NA	JU310	13
1e-5	1e-5	1e-5	0.072502	1e-5	1e-5	1e-5	1e-5	1e-5	1e-5	0.1328	1e-5	0.794598	NA	NA	JU311	13
0.447092	1e-5	1e-5	0.401314	1e-5	1e-5	1e-5	1e-5	1e-5	1e-5	1e-5	1e-5	0.151494	NA	NA	JU3125	13
0.535918	1e-5	0.089435	0.196405	1e-5	1e-5	1e-5	1e-5	1e-5	1e-5	1e-5	1e-5	0.178153	NA	NA	JU3127	13
1e-5	1e-5	1e-5	0.767958	1e-5	1e-5	1e-5	1e-5	1e-5	1e-5	0.231932	1e-5	1e-5	NA	NA	JU3128	13
1e-5	1e-5	1e-5	1e-5	1e-5	1e-5	1e-5	1e-5	1e-5	1e-5	0.99988	1e-5	1e-5	NA	NA	JU3132	13
0.092889	1e-5	1e-5	0.539372	1e-5	1e-5	0.25066	1e-5	1e-5	1e-5	0.105763	1e-5	0.011236	NA	NA	JU3134	13
1e-5	1e-5	1e-5	0.99988	1e-5	1e-5	1e-5	1e-5	1e-5	1e-5	1e-5	1e-5	1e-5	NA	NA	JU3135	13
0.441916	1e-5	1e-5	0.078182	1e-5	1e-5	1e-5	1e-5	0.04059	1.5e-5	0.280049	1e-5	0.159178	NA	NA	JU3137	13
1e-5	1e-5	1e-5	1e-5	1e-5	1e-5	1e-5	1e-5	1e-5	1e-5	0.99988	1e-5	1e-5	NA	NA	JU3140	13
0.067577	1e-5	1e-5	1e-5	1e-5	1e-5	0.932313	1e-5	1e-5	1e-5	1e-5	1e-5	1e-5	NA	NA	JU3144	13
0.180339	1e-5	1e-5	0.394065	1e-5	1e-5	1e-5	1e-5	1e-5	1e-5	0.425496	1e-5	1e-5	NA	NA	JU323	13
1e-5	1e-5	1e-5	0.50156	1e-5	1e-5	1e-5	1e-5	1e-5	1e-5	0.49833	1e-5	1e-5	NA	NA	JU346	13
1e-5	1e-5	1e-5	0.189854	1e-5	1e-5	0.807242	1e-5	1e-5	1e-5	0.002804	1e-5	1e-5	NA	NA	JU360	13
1e-5	1e-5	1e-5	0.045013	1e-5	1e-5	1e-5	1e-5	1e-5	1e-5	1e-5	1e-5	0.954877	NA	NA	JU367	13
1e-5	1e-5	1e-5	1e-5	1e-5	1e-5	1e-5	1e-5	1e-5	1e-5	0.845495	1e-5	0.154395	NA	NA	JU393	13
1e-5	1e-5	1e-5	1e-5	1e-5	1e-5	1e-5	1e-5	1e-5	1e-5	1e-5	1e-5	0.99988	NA	NA	JU394	13
1e-5	1e-5	1e-5	1e-5	1e-5	1e-5	1e-5	1e-5	1e-5	1e-5	0.789496	1e-5	0.210394	NA	NA	JU397	13
1e-5	1e-5	1e-5	1e-5	1e-5	1e-5	1e-5	1e-5	1e-5	1e-5	1e-5	1e-5	0.99988	NA	NA	JU406	13
1e-5	1e-5	1e-5	0.211965	1e-5	1e-5	1.8e-5	1e-5	1e-5	1e-5	0.144182	1e-5	0.643746	NA	NA	JU440	13
1e-5	1e-5	1e-5	0.791801	1e-5	1e-5	1e-5	1e-5	1e-5	1e-5	0.02051	1e-5	0.18759	NA	NA	JU561	13
0.245946	1e-5	1e-5	0.431666	1e-5	1e-5	0.070208	1e-5	1e-5	1e-5	0.25209	1e-5	1e-5	NA	NA	JU642	13
1e-5	1e-5	1e-5	1e-5	1e-5	1e-5	0.99988	1e-5	1e-5	1e-5	1e-5	1e-5	1e-5	NA	NA	JU751	13
0.648674	1e-5	1e-5	0.237512	0.052554	1e-5	0.06117	1e-5	1e-5	1e-5	1e-5	1e-5	1e-5	NA	NA	JU774	13
0.083243	1e-5	1e-5	1e-5	1e-5	0.916643	1e-5	1e-5	1e-5	1.5e-5	1e-5	1e-5	1e-5	NA	NA	JU775	13
0.947661	1e-5	1e-5	1e-5	1e-5	1e-5	1e-5	1e-5	0.052229	1e-5	1e-5	1e-5	1e-5	NA	NA	JU778	13
0.526923	1e-5	1e-5	0.033214	1.1e-5	0.439759	1.1e-5	1e-5	1e-5	1e-5	1.1e-5	1e-5	1e-5	NA	NA	JU782	13
1e-5	1e-5	1e-5	1e-5	1e-5	1e-5	1e-5	1e-5	1e-5	1e-5	0.99988	1e-5	1e-5	NA	NA	JU792	13
1e-5	1e-5	1e-5	0.277549	1e-5	1e-5	0.722341	1e-5	1e-5	1e-5	1e-5	1e-5	1e-5	NA	NA	JU830	13
1e-5	1e-5	1e-5	0.277382	1e-5	1e-5	1e-5	1e-5	1e-5	1e-5	0.559636	1e-5	0.162882	NA	NA	JU847	13
0.129762	1e-5	0.282816	0.54039	1e-5	1e-5	1e-5	1e-5	1e-5	1e-5	0.046942	1e-5	1e-5	NA	NA	KR314	13
0.99988	1e-5	1e-5	1e-5	1e-5	1e-5	1e-5	1e-5	1e-5	1e-5	1e-5	1e-5	1e-5	NA	NA	LKC34	13
1e-5	1e-5	1e-5	1e-5	1e-5	1e-5	1e-5	1e-5	1e-5	1e-5	1e-5	1e-5	0.99988	NA	NA	LSJ1	13
0.563426	1e-5	1e-5	0.254623	1e-5	1e-5	0.181851	1e-5	1e-5	1e-5	1e-5	1e-5	1e-5	NA	NA	MY1	13
0.095802	1e-5	1e-5	0.475004	1e-5	0.23711	0.191994	1e-5	1e-5	1e-5	1e-5	1e-5	1e-5	NA	NA	MY10	13
1e-5	1e-5	1e-5	1e-5	1e-5	1e-5	1e-5	1e-5	1e-5	1e-5	1e-5	0.99988	1e-5	NA	NA	MY16	13
1e-5	1e-5	1e-5	1e-5	1.1e-5	1.2e-5	0.872558	1e-5	1e-5	1e-5	1e-5	1e-5	0.127329	NA	NA	MY18	13
1e-5	1e-5	1e-5	0.114973	1e-5	1e-5	1e-5	1e-5	0.022418	1e-5	0.400876	1e-5	0.461643	NA	NA	MY2147	13
1e-5	1e-5	1e-5	0.703348	1e-5	1e-5	0.192162	1e-5	1e-5	1e-5	0.10439	1e-5	1e-5	NA	NA	MY2212	13
1e-5	1e-5	1e-5	1e-5	1e-5	1e-5	1e-5	1e-5	1e-5	1e-5	1e-5	0.99988	1e-5	NA	NA	MY23	13
0.098343	1e-5	1e-5	0.054471	1e-5	1e-5	0.12486	1e-5	1e-5	1e-5	0.193108	1e-5	0.529138	NA	NA	MY2453	13
0.058043	1e-5	1e-5	0.76	1e-5	1e-5	1e-5	1e-5	1e-5	1e-5	0.181857	1e-5	1e-5	NA	NA	MY2530	13
0.174273	1e-5	1e-5	0.705747	1e-5	1e-5	0.028294	1e-5	1e-5	1e-5	0.091597	1e-5	1e-5	NA	NA	MY2535	13
1e-5	1e-5	1e-5	1.1e-5	1e-5	1e-5	1e-5	1e-5	1e-5	1e-5	0.661771	1e-5	0.338118	NA	NA	MY2573	13
1e-5	1e-5	1e-5	0.901958	1e-5	1e-5	0.097932	1e-5	1e-5	1e-5	1e-5	1e-5	1e-5	NA	NA	MY2585	13
1e-5	1e-5	1e-5	0.99988	1e-5	1e-5	1e-5	1e-5	1e-5	1e-5	1e-5	1e-5	1e-5	NA	NA	MY2693	13
1e-5	1e-5	1e-5	0.99988	1e-5	1e-5	1e-5	1e-5	1e-5	1e-5	1e-5	1e-5	1e-5	NA	NA	MY2713	13
1e-5	1e-5	1e-5	0.319306	1e-5	1e-5	0.680584	1e-5	1e-5	1e-5	1e-5	1e-5	1e-5	NA	NA	MY2741	13
0.040335	1e-5	0.637797	1e-5	1e-5	1e-5	0.321768	1e-5	1e-5	1e-5	1e-5	1e-5	1e-5	NA	NA	MY518	13
0.180131	1e-5	0.012879	0.806889	1e-5	1e-5	1e-5	1e-5	1e-5	1e-5	1e-5	1e-5	1e-5	NA	NA	MY679	13
1e-5	1e-5	1e-5	0.296538	1e-5	1e-5	1e-5	1e-5	1e-5	1e-5	0.703352	1e-5	1e-5	NA	NA	MY772	13
1e-5	1e-5	0.022005	1.2e-5	1e-5	1e-5	0.778931	1e-5	1e-5	1e-5	1e-5	1e-5	0.198963	NA	NA	MY795	13
1e-5	1e-5	1e-5	0.797214	1e-5	1e-5	1e-5	1e-5	1e-5	1e-5	0.202676	1e-5	1e-5	NA	NA	MY920	13
1e-5	1e-5	1e-5	1e-5	1e-5	1e-5	1e-5	1e-5	1e-5	1e-5	1e-5	1e-5	0.99988	NA	NA	N2	13
0.079669	1e-5	1e-5	0.532838	1e-5	1e-5	1e-5	1e-5	1e-5	1e-5	0.387392	1e-5	1e-5	NA	NA	NIC1	13
1e-5	1e-5	1e-5	0.033006	1e-5	1e-5	1e-5	1e-5	1e-5	1e-5	0.591699	1e-5	0.375195	NA	NA	NIC1049	13
1e-5	1e-5	1e-5	1e-5	1e-5	1e-5	1e-5	1e-5	1e-5	1e-5	0.205978	1e-5	0.793912	NA	NA	NIC1107	13
0.219973	1e-5	1e-5	0.378536	1e-5	1e-5	1e-5	1e-5	1e-5	1e-5	0.373787	1e-5	0.027615	NA	NA	NIC166	13
0.321132	1e-5	1e-5	1e-5	1e-5	0.258855	0.09798	1e-5	1e-5	0.154376	0.048268	1e-5	0.119318	NA	NA	NIC195	13
0.163554	1e-5	1e-5	1e-5	1e-5	0.447233	1e-5	1e-5	1e-5	0.098927	0.290196	1e-5	1e-5	NA	NA	NIC199	13
1e-5	1.1e-5	1e-5	0.588182	1e-5	1e-5	1e-5	1e-5	1e-5	1e-5	1.1e-5	1e-5	0.411705	NA	NA	NIC2	13
0.104344	1e-5	1e-5	0.659249	1e-5	1e-5	1e-5	1e-5	1e-5	1e-5	0.20144	1e-5	0.034877	NA	NA	NIC207	13
0.225978	1e-5	1e-5	0.733563	5.85e-4	1e-5	1e-5	1e-5	1e-5	1e-5	1e-5	0.039784	1e-5	NA	NA	NIC231	13
0.998118	1e-5	1e-5	1e-5	1e-5	1e-5	1e-5	1e-5	1e-5	1e-5	0.001772	1e-5	1e-5	NA	NA	NIC236	13
0.32248	1e-5	1e-5	0.045926	1e-5	1e-5	1e-5	1e-5	1e-5	1e-5	0.201726	1e-5	0.429778	NA	NA	NIC242	13
1e-5	1e-5	1e-5	1e-5	1e-5	0.714494	1e-5	1e-5	1e-5	0.207507	1e-5	1e-5	0.077899	NA	NA	NIC251	13
0.924913	1e-5	1e-5	1e-5	1e-5	1e-5	1e-5	1e-5	1e-5	0.074977	1e-5	1e-5	1e-5	NA	NA	NIC252	13
1e-5	1e-5	1e-5	0.668654	1e-5	1e-5	1e-5	1e-5	1e-5	1e-5	0.139206	1e-5	0.19204	NA	NA	NIC255	13
0.621123	1.4e-5	1e-5	1.1e-5	1e-5	0.378758	1e-5	1e-5	1.4e-5	1e-5	1e-5	1e-5	1e-5	NA	NA	NIC256	13
1e-5	1e-5	1e-5	1e-5	1e-5	0.99988	1e-5	1e-5	1e-5	1e-5	1e-5	1e-5	1e-5	NA	NA	NIC258	13
0.620216	1e-5	1e-5	1e-5	1e-5	0.094621	1e-5	1e-5	1e-5	1e-5	0.156163	1e-5	0.12891	NA	NA	NIC259	13
0.443326	1e-5	1e-5	0.013608	1e-5	0.542966	1e-5	1e-5	1e-5	1e-5	1e-5	1e-5	1e-5	NA	NA	NIC260	13
0.320022	1e-5	1e-5	1e-5	1e-5	0.679868	1e-5	1e-5	1e-5	1e-5	1e-5	1e-5	1e-5	NA	NA	NIC261	13
0.438759	1e-5	1e-5	1e-5	1e-5	0.561131	1e-5	1e-5	1e-5	1e-5	1e-5	1e-5	1e-5	NA	NA	NIC262	13
1e-5	1e-5	1e-5	1e-5	1e-5	0.99988	1e-5	1e-5	1e-5	1e-5	1e-5	1e-5	1e-5	NA	NA	NIC265	13
0.606724	1e-5	1e-5	1e-5	1e-5	0.040359	0.100249	1e-5	1e-5	0.013439	1e-5	1e-5	0.23915	NA	NA	NIC266	13
0.743975	1e-5	0.070377	0.185548	1e-5	1e-5	1e-5	1e-5	1e-5	1e-5	1e-5	1e-5	1e-5	NA	NA	NIC267	13
0.473909	1e-5	1e-5	0.017639	1e-5	1e-5	1e-5	1e-5	1e-5	0.194103	1e-5	0.314258	1e-5	NA	NA	NIC268	13
0.854932	1e-5	1e-5	1e-5	1e-5	1e-5	1e-5	1e-5	1e-5	1e-5	0.144958	1e-5	1e-5	NA	NA	NIC269	13
0.589474	1e-5	1.1e-5	1e-5	1e-5	0.410411	1.3e-5	1e-5	1e-5	1e-5	1e-5	1e-5	1e-5	NA	NA	NIC271	13
0.995536	1e-5	1e-5	1e-5	1e-5	1e-5	1e-5	1e-5	1e-5	1e-5	0.004354	1e-5	1e-5	NA	NA	NIC272	13
0.99988	1e-5	1e-5	1e-5	1e-5	1e-5	1e-5	1e-5	1e-5	1e-5	1e-5	1e-5	1e-5	NA	NA	NIC274	13
0.816066	1e-5	1e-5	0.183824	1e-5	1e-5	1e-5	1e-5	1e-5	1e-5	1e-5	1e-5	1e-5	NA	NA	NIC275	13
0.99988	1e-5	1e-5	1e-5	1e-5	1e-5	1e-5	1e-5	1e-5	1e-5	1e-5	1e-5	1e-5	NA	NA	NIC276	13
1e-5	1e-5	1e-5	0.23549900000000001	1e-5	1e-5	0.197958	1e-5	1e-5	1e-5	0.561444	1e-5	0.005008	NA	NA	NIC277	13
0.045975	1e-5	0.022291	0.282045	1e-5	1e-5	0.161114	1e-5	1e-5	1e-5	0.488496	1e-5	1e-5	NA	NA	NIC3	13
1e-5	1e-5	1e-5	1e-5	1e-5	1e-5	1e-5	1e-5	1e-5	1e-5	0.999879	1.1e-5	1e-5	NA	NA	NIC501	13
1e-5	1e-5	1e-5	0.664842	1e-5	1e-5	1e-5	1e-5	1e-5	1e-5	0.335048	1e-5	1e-5	NA	NA	NIC511	13
0.99988	1e-5	1e-5	1e-5	1e-5	1e-5	1e-5	1e-5	1e-5	1e-5	1e-5	1e-5	1e-5	NA	NA	NIC513	13
0.99988	1e-5	1e-5	1e-5	1e-5	1e-5	1e-5	1e-5	1e-5	1e-5	1e-5	1e-5	1e-5	NA	NA	NIC514	13
0.458902	1e-5	1e-5	0.31218	1e-5	0.021775	1.1e-5	1e-5	1e-5	1e-5	0.20705200000000001	1e-5	1e-5	NA	NA	NIC515	13
0.323422	1e-5	1e-5	0.36881	1e-5	1.7e-5	0.02335	1e-5	1e-5	1e-5	0.190072	1e-5	0.094259	NA	NA	NIC522	13
0.349995	1e-5	1e-5	0.462169	1e-5	1e-5	1e-5	1e-5	0.187736	1e-5	1e-5	1e-5	1e-5	NA	NA	NIC523	13
0.324633	1e-5	1e-5	1e-5	1e-5	1e-5	0.647011	1e-5	1e-5	1e-5	0.028255	1e-5	1e-5	NA	NA	NIC526	13
0.17442	1.1e-5	1e-5	1e-5	1e-5	0.003111	0.217274	1e-5	1e-5	1e-5	0.567435	1e-5	0.037679	NA	NA	NIC527	13
0.061892	1e-5	1e-5	0.609024	1e-5	1e-5	0.287344	1e-5	1e-5	1e-5	0.041649	1e-5	1e-5	NA	NA	NIC528	13
0.181141	1e-5	1e-5	0.673639	1e-5	1e-5	1e-5	1e-5	1e-5	1e-5	0.074047	1e-5	0.071083	NA	NA	NIC529	13
1e-5	1e-5	0.179639	0.820251	1e-5	1e-5	1e-5	1e-5	1e-5	1e-5	1e-5	1e-5	1e-5	NA	NA	PB303	13
1e-5	1.9e-5	0.841484	1e-5	1e-5	1e-5	1e-5	1e-5	0.158385	1.9e-5	1.2e-5	1e-5	1e-5	NA	NA	PB306	13
1e-5	1e-5	0.477709	1e-5	1e-5	1e-5	1e-5	1e-5	0.522181	1e-5	1e-5	1e-5	1e-5	NA	NA	PS2025	13
1e-5	1e-5	1e-5	0.738493	1e-5	1e-5	1e-5	1e-5	1e-5	1e-5	1e-5	1e-5	0.261397	NA	NA	PX179	13
0.093967	1e-5	0.287791	0.180506	1e-5	0.073819	0.265199	1e-5	1e-5	0.050498	1e-5	0.029941	0.018229	NA	NA	QG2075	13
0.368317	1e-5	0.17119500000000001	0.460388	1e-5	1e-5	1e-5	1e-5	1e-5	1e-5	1e-5	1e-5	1e-5	NA	NA	QG536	13
1e-5	1e-5	0.340766	0.01652	1e-5	1e-5	1e-5	1e-5	0.642614	1e-5	1e-5	1e-5	1e-5	NA	NA	QG556	13
1e-5	1e-5	0.786013	1e-5	1e-5	1e-5	1e-5	1e-5	0.213877	1e-5	1e-5	1e-5	1e-5	NA	NA	QG557	13
1e-5	0.046166	1e-5	0.514281	1e-5	0.167743	1e-5	1e-5	1e-5	1.8e-5	0.271711	1e-5	1e-5	NA	NA	QW947	13
1e-5	0.99988	1e-5	1e-5	1e-5	1e-5	1e-5	1e-5	1e-5	1e-5	1e-5	1e-5	1e-5	NA	NA	QX1211	13
1e-5	1e-5	0.939709	1e-5	1e-5	1e-5	2e-5	1e-5	1e-5	0.060169	1e-5	1.2e-5	1e-5	NA	NA	QX1212	13
1e-5	1e-5	0.911982	0.087908	1e-5	1e-5	1e-5	1e-5	1e-5	1e-5	1e-5	1e-5	1e-5	NA	NA	QX1233	13
1e-5	1e-5	0.014662	1e-5	1e-5	1e-5	0.164912	1e-5	0.220173	0.496195	1e-5	1e-5	0.103978	NA	NA	QX1791	13
0.11338	1e-5	1e-5	0.201005	1e-5	1e-5	1e-5	1e-5	0.685515	1e-5	1e-5	1e-5	1e-5	NA	NA	QX1792	13
0.077055	1e-5	1e-5	1e-5	1e-5	1e-5	1e-5	1e-5	0.922835	1e-5	1e-5	1e-5	1e-5	NA	NA	QX1793	13
1e-5	1e-5	1e-5	1e-5	1e-5	1e-5	1e-5	1e-5	0.99988	1e-5	1e-5	1e-5	1e-5	NA	NA	QX1794	13
1e-5	1e-5	0.007678	0.92258	1e-5	1e-5	0.069642	1e-5	1e-5	1e-5	1e-5	1e-5	1e-5	NA	NA	RC301	13
1e-5	1e-5	1e-5	1e-5	1e-5	0.216074	0.783816	1e-5	1e-5	1e-5	1e-5	1e-5	1e-5	NA	NA	WN2001	13
0.033387	1e-5	1e-5	0.433817	1e-5	0.082412	0.227897	1e-5	1e-5	1e-5	1e-5	1e-5	0.222406	NA	NA	WN2002	13
1e-5	1e-5	0.048361	0.438231	1e-5	1e-5	0.513308	1e-5	1e-5	1e-5	1e-5	1e-5	1e-5	NA	NA	WN2033	13
1e-5	1e-5	1e-5	1e-5	1e-5	1e-5	1e-5	1e-5	1e-5	1e-5	0.616954	1e-5	0.382936	NA	NA	WN2050	13
1e-5	1e-5	1e-5	1e-5	1e-5	1e-5	1e-5	1e-5	0.99988	1e-5	1e-5	1e-5	1e-5	NA	NA	XZ1513	13
1e-5	0.999875	1.1e-5	1e-5	1.2e-5	1e-5	1e-5	1e-5	1.2e-5	1e-5	1e-5	1e-5	1e-5	NA	NA	XZ1514	13
1e-5	0.069596	0.219867	1e-5	1.4e-5	1e-5	1e-5	1e-5	0.710434	1e-5	1e-5	1e-5	1e-5	NA	NA	XZ1515	13
1e-5	0.618606	1e-5	1e-5	1e-5	1e-5	1e-5	0.19879	1e-5	0.182504	1e-5	1e-5	1e-5	NA	NA	XZ1516	13
0.532533	1e-5	1e-5	1e-5	1e-5	1e-5	1e-5	0.454181	1e-5	1e-5	1e-5	0.013195	NA	NA	NA	AB1	12
0.99989	1e-5	1e-5	1e-5	1e-5	1e-5	1e-5	1e-5	1e-5	1e-5	1e-5	1e-5	NA	NA	NA	BRC20067	12
0.244085	1e-5	1e-5	1e-5	1e-5	0.536118	0.109978	1e-5	1e-5	0.061166	1e-5	0.048584	NA	NA	NA	BRC20263	12
1e-5	1.5e-5	1.1e-5	1e-5	1e-5	1e-5	1e-5	0.999884	1e-5	1e-5	1.1e-5	1e-5	NA	NA	NA	CB4851	12
0.780185	1e-5	1e-5	1e-5	1e-5	1e-5	1e-5	0.219715	1e-5	1e-5	1e-5	1e-5	NA	NA	NA	CB4852	12
0.211363	1e-5	1e-5	1e-5	1e-5	0.043916	0.744631	1e-5	1e-5	1e-5	1e-5	1e-5	NA	NA	NA	CB4853	12
0.429404	1e-5	1e-5	1e-5	1e-5	0.570496	1e-5	1e-5	1e-5	1e-5	1e-5	1e-5	NA	NA	NA	CB4854	12
0.115689	1e-5	1e-5	1e-5	1e-5	1e-5	0.884211	1e-5	1e-5	1e-5	1e-5	1e-5	NA	NA	NA	CB4855	12
1e-5	1e-5	0.99989	1e-5	1e-5	1e-5	1e-5	1e-5	1e-5	1e-5	1e-5	1e-5	NA	NA	NA	CB4856	12
1e-5	1e-5	1e-5	1e-5	1e-5	1e-5	0.99989	1e-5	1e-5	1e-5	1e-5	1e-5	NA	NA	NA	CB4857	12
1e-5	1e-5	1e-5	1e-5	1e-5	1e-5	0.99989	1e-5	1e-5	1e-5	1e-5	1e-5	NA	NA	NA	CB4858	12
1e-5	1e-5	1e-5	1e-5	1e-5	1e-5	1e-5	0.558374	0.441526	1e-5	1e-5	1e-5	NA	NA	NA	CB4932	12
0.018284	1e-5	1e-5	1e-5	1e-5	0.073464	0.658686	1e-5	1e-5	1e-5	1e-5	0.249486	NA	NA	NA	CX11254	12
1e-5	1e-5	1e-5	1e-5	1e-5	1e-5	0.878788	1e-5	1e-5	1e-5	0.121112	1e-5	NA	NA	NA	CX11262	12
1e-5	1e-5	1e-5	1e-5	1e-5	1e-5	0.950209	1e-5	1e-5	1e-5	0.049691	1e-5	NA	NA	NA	CX11264	12
0.132816	1e-5	1e-5	1e-5	1e-5	1e-5	0.434951	1e-5	1e-5	1e-5	1e-5	0.432143	NA	NA	NA	CX11271	12
0.092294	1e-5	1e-5	1e-5	1e-5	1e-5	0.582815	0.008451	1e-5	1e-5	1e-5	0.316359	NA	NA	NA	CX11276	12
1e-5	1e-5	1e-5	1e-5	1e-5	0.02624	0.410325	1e-5	1e-5	1e-5	0.26511	0.298245	NA	NA	NA	CX11285	12
0.080383	1e-5	1e-5	1e-5	1e-5	0.030857	0.88867	1e-5	1e-5	1e-5	1e-5	1e-5	NA	NA	NA	CX11292	12
0.151308	1e-5	1e-5	1e-5	1e-5	1e-5	0.509842	1e-5	1e-5	1e-5	0.06377	0.275	NA	NA	NA	CX11307	12
1e-5	1e-5	1e-5	1.1e-5	1.1e-5	1e-5	0.999884	1e-5	1.4e-5	1e-5	1e-5	1e-5	NA	NA	NA	CX11314	12
0.050845	1e-5	1e-5	1e-5	1e-5	1e-5	0.949055	1e-5	1e-5	1e-5	1e-5	1e-5	NA	NA	NA	CX11315	12
0.036484	1e-5	1e-5	1e-5	1e-5	1e-5	0.041097	1e-5	0.922329	1e-5	1e-5	1e-5	NA	NA	NA	DL200	12
0.046296	1e-5	1e-5	1e-5	1e-5	0.029742	0.769861	0.052753	1e-5	1e-5	0.036307	0.064981	NA	NA	NA	DL226	12
1e-5	1e-5	0.99989	1e-5	1e-5	1e-5	1e-5	1e-5	1e-5	1e-5	1e-5	1e-5	NA	NA	NA	DL238	12
1e-5	0.018401	1e-5	1e-5	1e-5	1e-5	1e-5	1e-5	1e-5	1e-5	0.981499	1e-5	NA	NA	NA	ECA189	12
1e-5	1e-5	1e-5	1e-5	0.99989	1e-5	1e-5	1e-5	1e-5	1e-5	1e-5	1e-5	NA	NA	NA	ECA191	12
1e-5	1e-5	1e-5	1e-5	1.6e-5	1e-5	1e-5	0.999883	1e-5	1e-5	1e-5	1e-5	NA	NA	NA	ECA252	12
1e-5	1e-5	1e-5	1e-5	0.99989	1e-5	1e-5	1e-5	1e-5	1e-5	1e-5	1e-5	NA	NA	NA	ECA347	12
1e-5	1.5e-5	1e-5	1e-5	1e-5	1e-5	0.437136	1e-5	1e-5	1e-5	0.56276	1e-5	NA	NA	NA	ECA348	12
1e-5	1e-5	1e-5	1e-5	1e-5	1e-5	0.81622	1e-5	1e-5	1e-5	0.183679	1e-5	NA	NA	NA	ECA349	12
1e-5	1e-5	1.3e-5	1e-5	0.999887	1e-5	1e-5	1e-5	1e-5	1e-5	1e-5	1e-5	NA	NA	NA	ECA36	12
1e-5	1e-5	1e-5	1e-5	0.99989	1e-5	1e-5	1e-5	1e-5	1e-5	1e-5	1e-5	NA	NA	NA	ECA363	12
1e-5	1e-5	0.99989	1e-5	1e-5	1e-5	1e-5	1e-5	1e-5	1e-5	1e-5	1e-5	NA	NA	NA	ECA369	12
1e-5	1e-5	1e-5	1e-5	1e-5	1e-5	1e-5	1e-5	1e-5	1e-5	0.947175	0.052725	NA	NA	NA	ECA372	12
1e-5	1e-5	1e-5	1e-5	0.99989	1e-5	1e-5	1e-5	1e-5	1e-5	1e-5	1e-5	NA	NA	NA	ECA396	12
1e-5	1e-5	0.470846	1.4e-5	0.529049	1e-5	1e-5	1e-5	1e-5	1e-5	1.1e-5	1e-5	NA	NA	NA	ECA701	12
1e-5	1e-5	0.99989	1e-5	1e-5	1e-5	1e-5	1e-5	1e-5	1e-5	1e-5	1e-5	NA	NA	NA	ECA703	12
1e-5	1.1e-5	1e-5	1e-5	1e-5	1e-5	1e-5	1e-5	1e-5	1e-5	0.999889	1e-5	NA	NA	NA	ECA705	12
1e-5	0.156021	0.843877	1e-5	1.1e-5	1e-5	1e-5	1e-5	1e-5	1e-5	1e-5	1e-5	NA	NA	NA	ECA706	12
1e-5	0.125388	1e-5	1e-5	1e-5	1e-5	1e-5	1e-5	1e-5	1e-5	0.874512	1e-5	NA	NA	NA	ECA710	12
1e-5	0.99989	1e-5	1e-5	1e-5	1e-5	1e-5	1e-5	1e-5	1e-5	1e-5	1e-5	NA	NA	NA	ECA712	12
1e-5	1e-5	1e-5	1e-5	0.99989	1e-5	1e-5	1e-5	1e-5	1e-5	1e-5	1e-5	NA	NA	NA	ECA722	12
1e-5	1e-5	1e-5	1e-5	0.99989	1e-5	1e-5	1e-5	1e-5	1e-5	1e-5	1e-5	NA	NA	NA	ECA723	12
1e-5	1e-5	1e-5	1e-5	0.921763	1e-5	0.064031	1e-5	1e-5	1e-5	0.014116	1e-5	NA	NA	NA	ECA724	12
1.5e-5	1e-5	1e-5	1.6e-5	0.999868	1e-5	1.8e-5	1.3e-5	1e-5	1e-5	1e-5	1e-5	NA	NA	NA	ECA730	12
1e-5	1e-5	0.999888	1.2e-5	1e-5	1e-5	1e-5	1e-5	1e-5	1e-5	1e-5	1e-5	NA	NA	NA	ECA732	12
1e-5	1e-5	0.99989	1e-5	1e-5	1e-5	1e-5	1e-5	1e-5	1e-5	1e-5	1e-5	NA	NA	NA	ECA733	12
1e-5	1e-5	1e-5	1e-5	1e-5	1e-5	1e-5	1e-5	1e-5	1e-5	0.99989	1e-5	NA	NA	NA	ECA738	12
1e-5	1e-5	1.3e-5	1.4e-5	0.999883	1e-5	1e-5	1e-5	1e-5	1e-5	1e-5	1e-5	NA	NA	NA	ECA740	12
1e-5	1e-5	1.4e-5	1e-5	0.999886	1e-5	1e-5	1e-5	1e-5	1e-5	1e-5	1e-5	NA	NA	NA	ECA741	12
1e-5	1e-5	1e-5	1e-5	0.999886	1e-5	1e-5	1e-5	1.4e-5	1e-5	1e-5	1e-5	NA	NA	NA	ECA742	12
1e-5	1e-5	1e-5	1e-5	1e-5	1e-5	1e-5	0.019238	0.072066	1e-5	0.888213	0.020403	NA	NA	NA	ECA743	12
1e-5	1e-5	1e-5	1e-5	0.99989	1e-5	1e-5	1e-5	1e-5	1e-5	1e-5	1e-5	NA	NA	NA	ECA744	12
1e-5	1e-5	1.7e-5	1e-5	0.999882	1e-5	1e-5	1e-5	1e-5	1e-5	1.1e-5	1e-5	NA	NA	NA	ECA745	12
1.9e-5	1.1e-5	1e-5	1.1e-5	0.999865	1.8e-5	1e-5	1e-5	1.7e-5	1e-5	1e-5	1e-5	NA	NA	NA	ECA746	12
1e-5	0.99989	1e-5	1e-5	1e-5	1e-5	1e-5	1e-5	1e-5	1e-5	1e-5	1e-5	NA	NA	NA	ECA760	12
1e-5	0.999889	1.1e-5	1e-5	1e-5	1e-5	1e-5	1e-5	1e-5	1e-5	1e-5	1e-5	NA	NA	NA	ECA768	12
1e-5	0.99989	1e-5	1e-5	1e-5	1e-5	1e-5	1e-5	1e-5	1e-5	1e-5	1e-5	NA	NA	NA	ECA777	12
1e-5	0.99989	1e-5	1e-5	1e-5	1e-5	1e-5	1e-5	1e-5	1e-5	1e-5	1e-5	NA	NA	NA	ECA778	12
1e-5	0.99989	1e-5	1e-5	1e-5	1e-5	1e-5	1e-5	1e-5	1e-5	1e-5	1e-5	NA	NA	NA	ECA807	12
1e-5	0.99989	1e-5	1e-5	1e-5	1e-5	1e-5	1e-5	1e-5	1e-5	1e-5	1e-5	NA	NA	NA	ECA812	12
0.128037	1e-5	1e-5	1e-5	1e-5	1e-5	0.871863	1e-5	1e-5	1e-5	1e-5	1e-5	NA	NA	NA	ED3005	12
0.124658	1e-5	1e-5	1e-5	1e-5	1e-5	0.685772	1e-5	1e-5	1e-5	1e-5	0.18948	NA	NA	NA	ED3011	12
0.268499	1e-5	1e-5	1e-5	1e-5	1e-5	1e-5	0.731401	1e-5	1e-5	1e-5	1e-5	NA	NA	NA	ED3012	12
0.495048	1e-5	1e-5	1e-5	1e-5	1e-5	1e-5	1e-5	0.504852	1e-5	1e-5	1e-5	NA	NA	NA	ED3017	12
0.189623	1e-5	1e-5	1e-5	1e-5	0.540483	1e-5	1e-5	1e-5	1e-5	1e-5	0.269804	NA	NA	NA	ED3040	12
0.275773	1e-5	1e-5	1e-5	1e-5	0.487774	1e-5	1e-5	0.236363	1e-5	1e-5	1e-5	NA	NA	NA	ED3046	12
0.664787	1e-5	1e-5	1e-5	1e-5	0.335113	1e-5	1e-5	1e-5	1e-5	1e-5	1e-5	NA	NA	NA	ED3048	12
0.266452	1e-5	1e-5	1e-5	1e-5	0.503767	1e-5	1e-5	0.229692	1e-5	1e-5	1e-5	NA	NA	NA	ED3049	12
0.134792	1e-5	1e-5	1e-5	1e-5	0.53561	1e-5	1e-5	1e-5	1e-5	1e-5	0.329509	NA	NA	NA	ED3052	12
0.86237	1e-5	1e-5	1e-5	1e-5	0.13753	1e-5	1e-5	1e-5	1e-5	1e-5	1e-5	NA	NA	NA	ED3073	12
0.616034	1e-5	1e-5	1e-5	1e-5	0.339942	1e-5	1e-5	1e-5	0.043933	1e-5	1e-5	NA	NA	NA	ED3077	12
0.656419	1e-5	1e-5	1e-5	1e-5	1e-5	0.070336	0.273155	1e-5	1e-5	1e-5	1e-5	NA	NA	NA	EG4347	12
0.587326	1e-5	1e-5	1e-5	1e-5	1e-5	1e-5	1e-5	1e-5	0.290333	1e-5	0.122251	NA	NA	NA	EG4349	12
0.155466	1e-5	1e-5	1e-5	1e-5	0.684344	1e-5	1e-5	0.133921	0.026189	1e-5	1e-5	NA	NA	NA	EG4724	12
0.023317	1e-5	1e-5	0.238664	1e-5	0.672092	1e-5	1e-5	1e-5	1e-5	1e-5	0.065847	NA	NA	NA	EG4725	12
0.397922	1e-5	1e-5	1e-5	1e-5	1e-5	0.539245	0.062743	1e-5	1e-5	1e-5	1e-5	NA	NA	NA	EG4946	12
0.859113	1e-5	1.1e-5	1e-5	1e-5	0.034241	1e-5	1e-5	1e-5	1e-5	1e-5	0.106554	NA	NA	NA	GXW1	12
0.606912	1e-5	1e-5	1e-5	1e-5	1e-5	1e-5	0.158482	0.097735	1e-5	1e-5	0.136791	NA	NA	NA	JT11398	12
0.659004	1.8e-5	1.9e-5	1e-5	1e-5	0.340879	1e-5	1e-5	1e-5	1e-5	1e-5	1e-5	NA	NA	NA	JU1088	12
0.090084	1e-5	1e-5	1e-5	1e-5	1e-5	0.909816	1e-5	1e-5	1e-5	1e-5	1e-5	NA	NA	NA	JU1172	12
0.2983	1e-5	1e-5	1e-5	1e-5	1e-5	1e-5	0.7016	1e-5	1e-5	1e-5	1e-5	NA	NA	NA	JU1200	12
1e-5	1e-5	1e-5	1e-5	1e-5	1e-5	1e-5	0.633931	1e-5	0.365969	1e-5	1e-5	NA	NA	NA	JU1212	12
1e-5	1e-5	1e-5	1e-5	1e-5	1e-5	1e-5	1e-5	0.555594	0.444306	1e-5	1e-5	NA	NA	NA	JU1213	12
1.9e-5	1e-5	1e-5	1e-5	1e-5	1e-5	1e-5	1.3e-5	0.999878	1e-5	1e-5	1e-5	NA	NA	NA	JU1242	12
1e-5	1e-5	1e-5	1e-5	1e-5	1e-5	1e-5	0.236053	1e-5	0.763847	1e-5	1e-5	NA	NA	NA	JU1246	12
1e-5	1e-5	1e-5	1e-5	1e-5	1e-5	1e-5	0.99989	1e-5	1e-5	1e-5	1e-5	NA	NA	NA	JU1249	12
0.734648	1e-5	1e-5	1e-5	1e-5	1e-5	1e-5	0.265252	1e-5	1e-5	1e-5	1e-5	NA	NA	NA	JU1395	12
0.181247	1e-5	1e-5	0.047398	1e-5	0.11011	1e-5	1e-5	0.395134	0.015162	1e-5	0.250889	NA	NA	NA	JU1400	12
0.545976	1e-5	1e-5	1e-5	1e-5	1e-5	1e-5	1e-5	0.043183	1e-5	1e-5	0.410751	NA	NA	NA	JU1409	12
0.645026	1e-5	1e-5	1e-5	1e-5	1e-5	1e-5	1e-5	0.039475	0.014936	1e-5	0.300484	NA	NA	NA	JU1440	12
1e-5	1e-5	1e-5	1e-5	1e-5	1.2e-5	1e-5	1.5e-5	1e-5	0.085389	1e-5	0.914505	NA	NA	NA	JU1491	12
0.311857	1.5e-5	1e-5	1e-5	1e-5	1.6e-5	1e-5	1e-5	0.688032	1e-5	1e-5	1e-5	NA	NA	NA	JU1530	12
0.335412	1e-5	1e-5	1e-5	1.1e-5	1e-5	1e-5	0.664487	1e-5	1e-5	1e-5	1e-5	NA	NA	NA	JU1543	12
1e-5	1e-5	1e-5	1e-5	1e-5	1e-5	1e-5	0.999886	1e-5	1.4e-5	1e-5	1e-5	NA	NA	NA	JU1568	12
1e-5	1e-5	1e-5	1e-5	1e-5	1e-5	1e-5	1e-5	1e-5	0.99989	1e-5	1e-5	NA	NA	NA	JU1580	12
0.140293	1e-5	1e-5	1e-5	1e-5	1e-5	1e-5	0.142592	0.121579	0.595456	1e-5	1e-5	NA	NA	NA	JU1581	12
0.131272	1e-5	1e-5	1e-5	1e-5	1e-5	1e-5	0.868628	1e-5	1e-5	1e-5	1e-5	NA	NA	NA	JU1586	12
0.538573	1e-5	1e-5	1e-5	1e-5	1e-5	1e-5	0.287238	1e-5	0.047314	1e-5	0.126795	NA	NA	NA	JU1652	12
1e-5	1e-5	1e-5	1e-5	1e-5	1e-5	1e-5	1e-5	0.99989	1e-5	1e-5	1e-5	NA	NA	NA	JU1666	12
1e-5	1e-5	1e-5	1e-5	1e-5	1e-5	1e-5	0.618826	0.381074	1e-5	1e-5	1e-5	NA	NA	NA	JU1792	12
1e-5	1e-5	1e-5	1.1e-5	1e-5	1e-5	1e-5	1e-5	1e-5	0.999889	1e-5	1e-5	NA	NA	NA	JU1793	12
0.037447	1e-5	1e-5	1e-5	1e-5	1e-5	0.370406	0.176395	0.415672	1e-5	1e-5	1e-5	NA	NA	NA	JU1808	12
0.331446	1e-5	0.011692	1e-5	1.1e-5	1e-5	1e-5	0.65677	1e-5	1.1e-5	1e-5	1e-5	NA	NA	NA	JU1896	12
1e-5	1e-5	1e-5	1e-5	1e-5	1e-5	1e-5	0.036057	0.360689	0.603164	1e-5	1e-5	NA	NA	NA	JU1934	12
1e-5	1e-5	0.197579	1e-5	1e-5	1e-5	1e-5	1e-5	0.556972	1e-5	1e-5	0.245359	NA	NA	NA	JU2001	12
0.521696	1e-5	1e-5	1e-5	1e-5	0.203398	1e-5	1e-5	1e-5	0.274815	1e-5	1e-5	NA	NA	NA	JU2007	12
0.139749	1e-5	1e-5	1e-5	1e-5	1e-5	0.860151	1e-5	1e-5	1e-5	1e-5	1e-5	NA	NA	NA	JU2016	12
0.201076	0.005317	0.041298	1e-5	1.1e-5	0.206543	0.418932	0.073422	1e-5	0.015779	0.037593	1e-5	NA	NA	NA	JU2017	12
1e-5	1e-5	1e-5	1e-5	1e-5	1e-5	1e-5	0.136146	0.226293	0.637471	1e-5	1e-5	NA	NA	NA	JU2106	12
1e-5	1e-5	1e-5	1e-5	1e-5	0.013918	1e-5	1e-5	0.985982	1e-5	1e-5	1e-5	NA	NA	NA	JU2131	12
1e-5	1e-5	1e-5	1e-5	1e-5	1.6e-5	1e-5	0.154935	0.596712	0.248257	1e-5	1e-5	NA	NA	NA	JU2141	12
0.332228	1e-5	1e-5	1e-5	1e-5	1e-5	1e-5	0.541361	1e-5	1e-5	1e-5	0.126321	NA	NA	NA	JU2234	12
1e-5	1e-5	1e-5	1e-5	1e-5	1e-5	1e-5	1.2e-5	0.999887	1.1e-5	1e-5	1e-5	NA	NA	NA	JU2250	12
1e-5	1e-5	1e-5	1e-5	1e-5	1e-5	1e-5	0.999889	1.1e-5	1e-5	1e-5	1e-5	NA	NA	NA	JU2257	12
1e-5	1e-5	1e-5	0.99989	1e-5	1e-5	1e-5	1e-5	1e-5	1e-5	1e-5	1e-5	NA	NA	NA	JU2316	12
0.547517	1e-5	1e-5	1e-5	1e-5	0.287848	1e-5	1e-5	0.03407	0.088743	1e-5	0.041752	NA	NA	NA	JU2464	12
0.99989	1e-5	1e-5	1e-5	1e-5	1e-5	1e-5	1e-5	1e-5	1e-5	1e-5	1e-5	NA	NA	NA	JU2466	12
0.152612	1e-5	1e-5	1e-5	1e-5	1e-5	0.398905	1e-5	0.448393	1e-5	1e-5	1e-5	NA	NA	NA	JU2478	12
0.83157	1e-5	1e-5	1e-5	1e-5	0.069369	1e-5	0.049846	0.049135	1e-5	1e-5	1e-5	NA	NA	NA	JU2513	12
1e-5	1e-5	1e-5	0.637959	1e-5	1e-5	1e-5	1e-5	1e-5	1e-5	1e-5	0.361941	NA	NA	NA	JU2519	12
1e-5	1e-5	1e-5	1e-5	1e-5	0.185714	1e-5	1e-5	1e-5	1e-5	1e-5	0.814186	NA	NA	NA	JU2522	12
1e-5	1e-5	1e-5	0.999885	1e-5	1e-5	1e-5	1e-5	1e-5	1.5e-5	1e-5	1e-5	NA	NA	NA	JU2526	12
0.455893	1e-5	1e-5	1e-5	1e-5	1e-5	1e-5	1e-5	0.544007	1e-5	1e-5	1e-5	NA	NA	NA	JU2534	12
1e-5	1e-5	1e-5	1e-5	1e-5	1e-5	1e-5	0.99989	1e-5	1e-5	1e-5	1e-5	NA	NA	NA	JU2565	12
0.090905	1e-5	1e-5	1e-5	1e-5	1e-5	1e-5	0.710949	0.198056	1e-5	1e-5	1e-5	NA	NA	NA	JU2566	12
1e-5	1e-5	1e-5	1e-5	1e-5	1e-5	1e-5	1e-5	0.99989	1e-5	1e-5	1e-5	NA	NA	NA	JU2570	12
1e-5	1e-5	1e-5	1e-5	1e-5	1e-5	1e-5	0.659056	0.340844	1e-5	1e-5	1e-5	NA	NA	NA	JU2572	12
1e-5	1e-5	1e-5	1e-5	1e-5	1e-5	1e-5	0.76201700000000006	0.237883	1e-5	1e-5	1e-5	NA	NA	NA	JU2575	12
0.238621	0.016331	0.016619	1e-5	1e-5	1e-5	1.7e-5	1e-5	0.289362	0.236515	1e-5	0.202484	NA	NA	NA	JU2576	12
0.329154	1e-5	1e-5	1e-5	1e-5	0.670746	1e-5	1e-5	1e-5	1e-5	1e-5	1e-5	NA	NA	NA	JU2578	12
1e-5	1e-5	1e-5	0.346549	1e-5	0.466961	1e-5	0.045569	1e-5	0.140841	1e-5	1e-5	NA	NA	NA	JU258	12
0.481581	1e-5	1e-5	1e-5	1e-5	1e-5	0.177203	1e-5	1e-5	1e-5	0.341126	1e-5	NA	NA	NA	JU2581	12
0.096273	1e-5	1e-5	0.027673	1e-5	0.38587	1e-5	1e-5	1e-5	0.103888	1e-5	0.386226	NA	NA	NA	JU2586	12
0.523583	1e-5	1e-5	1e-5	1e-5	1e-5	0.19389	1e-5	1e-5	0.130013	1e-5	0.152435	NA	NA	NA	JU2587	12
1e-5	1e-5	1e-5	0.031898	1e-5	0.059694	1e-5	0.771674	0.136654	1e-5	1e-5	1e-5	NA	NA	NA	JU2592	12
0.713091	1e-5	1e-5	1e-5	1e-5	1e-5	1e-5	1e-5	1e-5	0.030175	0.256644	1e-5	NA	NA	NA	JU2593	12
1e-5	1e-5	1e-5	1e-5	1e-5	1e-5	1e-5	1e-5	1e-5	0.99989	1e-5	1e-5	NA	NA	NA	JU2600	12
1e-5	1e-5	1e-5	1e-5	1e-5	1e-5	1e-5	1e-5	1e-5	0.99989	1e-5	1e-5	NA	NA	NA	JU2610	12
0.647131	1e-5	1e-5	1e-5	1e-5	1e-5	0.189134	1e-5	1e-5	1e-5	1e-5	0.163646	NA	NA	NA	JU2619	12
0.125609	1e-5	1e-5	1e-5	1e-5	1e-5	1e-5	0.455945	0.372704	0.045663	1e-5	1e-5	NA	NA	NA	JU2800	12
0.250816	0.029122	1e-5	1e-5	1e-5	0.228628	1e-5	1e-5	1e-5	0.055559	0.058308	0.377506	NA	NA	NA	JU2811	12
1e-5	1e-5	1e-5	1e-5	1e-5	1e-5	1e-5	0.915929	1e-5	0.083971	1e-5	1e-5	NA	NA	NA	JU2825	12
0.64454	1e-5	1e-5	1e-5	1e-5	1e-5	0.069996	1e-5	1e-5	0.023465	0.261918	1e-5	NA	NA	NA	JU2829	12
1e-5	1e-5	1e-5	1e-5	1e-5	0.60713	0.042395	1e-5	0.090527	0.065886	0.193991	1e-5	NA	NA	NA	JU2838	12
0.564857	1e-5	1e-5	1e-5	1e-5	1e-5	1e-5	1e-5	1e-5	0.435043	1e-5	1e-5	NA	NA	NA	JU2841	12
0.340042	1e-5	1e-5	1e-5	1e-5	0.296832	1e-5	0.276213	1e-5	1e-5	1e-5	0.086833	NA	NA	NA	JU2853	12
0.089363	1e-5	1e-5	1e-5	1e-5	1e-5	0.46535	0.003892	0.188823	1e-5	1e-5	0.252501	NA	NA	NA	JU2862	12
1e-5	1e-5	1e-5	1e-5	1e-5	1e-5	0.754142	1e-5	1e-5	1e-5	0.245758	1e-5	NA	NA	NA	JU2866	12
0.534856	1e-5	1e-5	1e-5	1e-5	0.289073	0.102237	1e-5	1e-5	1e-5	0.073754	1e-5	NA	NA	NA	JU2878	12
0.335882	1e-5	1e-5	1e-5	1e-5	1e-5	0.045438	1e-5	1e-5	1e-5	0.61858900000000006	1e-5	NA	NA	NA	JU2879	12
0.510799	1.2e-5	1e-5	1e-5	1e-5	1.5e-5	1.4e-5	0.208429	0.280671	1e-5	1e-5	1e-5	NA	NA	NA	JU2906	12
0.469632	1e-5	1e-5	1e-5	1e-5	1e-5	1e-5	0.530268	1e-5	1e-5	1e-5	1e-5	NA	NA	NA	JU2907	12
0.302071	1.1e-5	1e-5	1e-5	1e-5	1.4e-5	1e-5	1e-5	0.697824	1e-5	1e-5	1e-5	NA	NA	NA	JU310	12
0.06208	1e-5	1e-5	1e-5	1e-5	1e-5	1e-5	0.701118	0.236713	1e-5	1e-5	1e-5	NA	NA	NA	JU311	12
0.430999	1e-5	1e-5	1e-5	1e-5	1e-5	1e-5	0.153578	1e-5	1e-5	1e-5	0.415334	NA	NA	NA	JU3125	12
0.26338	1e-5	1e-5	1e-5	1e-5	1e-5	1e-5	0.1806	1e-5	1e-5	1e-5	0.555929	NA	NA	NA	JU3127	12
0.758516	1e-5	1e-5	1e-5	1e-5	1e-5	1e-5	1e-5	0.241384	1e-5	1e-5	1e-5	NA	NA	NA	JU3128	12
1e-5	1e-5	1e-5	1e-5	1e-5	1e-5	1e-5	1e-5	0.739447	0.245412	1e-5	0.015051	NA	NA	NA	JU3132	12
0.70081	1e-5	1e-5	1e-5	1e-5	1e-5	1e-5	1e-5	0.016124	1e-5	1e-5	0.282976	NA	NA	NA	JU3134	12
0.999885	1e-5	1.5e-5	1e-5	1e-5	1e-5	1e-5	1e-5	1e-5	1e-5	1e-5	1e-5	NA	NA	NA	JU3135	12
0.118442	1e-5	1e-5	1e-5	1e-5	1e-5	1e-5	0.055125	0.275318	1e-5	1e-5	0.551035	NA	NA	NA	JU3137	12
1e-5	1e-5	1e-5	1e-5	1e-5	1e-5	1e-5	1e-5	0.999884	1.6e-5	1e-5	1e-5	NA	NA	NA	JU3140	12
0.431252	1e-5	1e-5	1e-5	1e-5	0.205757	1e-5	1e-5	0.1859	0.078666	1e-5	0.098354	NA	NA	NA	JU3144	12
0.103672	1e-5	1e-5	1e-5	1e-5	0.318232	1e-5	1e-5	0.578007	1e-5	1e-5	1e-5	NA	NA	NA	JU323	12
0.469099	1e-5	1e-5	1e-5	1.2e-5	1e-5	1e-5	1e-5	0.507914	0.022895	1e-5	1e-5	NA	NA	NA	JU346	12
0.725858	1e-5	1e-5	1e-5	1e-5	1e-5	0.034777	1e-5	1e-5	0.200199	0.039086	1e-5	NA	NA	NA	JU360	12
0.060183	1e-5	1e-5	1e-5	1e-5	1e-5	1e-5	0.939717	1e-5	1e-5	1e-5	1e-5	NA	NA	NA	JU367	12
1e-5	1e-5	1e-5	1e-5	1e-5	1e-5	1e-5	0.172141	1e-5	0.827759	1e-5	1e-5	NA	NA	NA	JU393	12
1.3e-5	1.2e-5	1.8e-5	1.9e-5	1e-5	1e-5	1e-5	0.999856	1.3e-5	2e-5	1e-5	1e-5	NA	NA	NA	JU394	12
1e-5	1e-5	1e-5	1e-5	1e-5	1e-5	1e-5	0.217685	0.782215	1e-5	1e-5	1e-5	NA	NA	NA	JU397	12
1e-5	1e-5	1e-5	1e-5	1e-5	1e-5	1e-5	0.99989	1e-5	1e-5	1e-5	1e-5	NA	NA	NA	JU406	12
0.185163	1e-5	1e-5	1e-5	1e-5	1e-5	1e-5	0.618116	0.196631	1e-5	1e-5	1e-5	NA	NA	NA	JU440	12
0.72049	1e-5	1e-5	1e-5	1e-5	0.062821	1e-5	0.188842	0.027759	1e-5	1.8e-5	1e-5	NA	NA	NA	JU561	12
0.470367	1e-5	1e-5	1e-5	1e-5	0.081081	1e-5	1e-5	0.147968	0.082958	1e-5	0.217556	NA	NA	NA	JU642	12
0.585064	1e-5	1e-5	0.019052	1e-5	1e-5	0.15885	1e-5	0.029099	0.07151	0.098303	0.038071	NA	NA	NA	JU751	12
0.308096	0.055151	1e-5	1e-5	1e-5	0.175762	1e-5	1e-5	1e-5	1e-5	1e-5	0.460911	NA	NA	NA	JU774	12
1e-5	1e-5	1e-5	0.87746	1e-5	1e-5	1e-5	1e-5	1e-5	1e-5	1e-5	0.12244	NA	NA	NA	JU775	12
1e-5	1e-5	1e-5	1e-5	1e-5	1e-5	1e-5	1e-5	1e-5	1e-5	1e-5	0.99989	NA	NA	NA	JU778	12
1e-5	1e-5	1e-5	0.343862	1e-5	1e-5	1e-5	1e-5	1e-5	1e-5	1e-5	0.656038	NA	NA	NA	JU782	12
1e-5	1e-5	1e-5	1e-5	1e-5	1e-5	1e-5	1e-5	0.99989	1e-5	1e-5	1e-5	NA	NA	NA	JU792	12
0.707516	1e-5	1e-5	1e-5	1e-5	0.131814	0.1289	1e-5	0.031689	1e-5	1e-5	1e-5	NA	NA	NA	JU830	12
0.180988	1e-5	1e-5	1e-5	1e-5	0.053463	1e-5	0.097553	0.667917	1e-5	1e-5	1e-5	NA	NA	NA	JU847	12
0.561396	1e-5	1e-5	1e-5	1e-5	0.027949	0.256869	1e-5	1e-5	1e-5	1e-5	0.153706	NA	NA	NA	KR314	12
1e-5	1e-5	1e-5	1e-5	1e-5	0.325537	1e-5	1e-5	1e-5	1e-5	1e-5	0.674363	NA	NA	NA	LKC34	12
1e-5	1e-5	1.2e-5	1e-5	1e-5	1e-5	1e-5	0.999888	1e-5	1e-5	1e-5	1e-5	NA	NA	NA	LSJ1	12
0.12406	1e-5	1e-5	1e-5	1e-5	0.87584	1e-5	1e-5	1e-5	1e-5	1e-5	1e-5	NA	NA	NA	MY1	12
0.517278	1e-5	0.05361	0.083593	1e-5	1.8e-5	1e-5	1e-5	1e-5	0.041555	1e-5	0.303886	NA	NA	NA	MY10	12
1e-5	1e-5	1e-5	1e-5	1e-5	1e-5	0.047719	0.186001	0.13695	1e-5	0.62925	1e-5	NA	NA	NA	MY16	12
0.090688	1e-5	1e-5	1e-5	1e-5	1e-5	0.493258	0.072035	0.16636600000000001	0.177582	1e-5	1e-5	NA	NA	NA	MY18	12
0.051409	1e-5	1e-5	1e-5	1e-5	1e-5	1e-5	0.388716	0.559785	1e-5	1e-5	1e-5	NA	NA	NA	MY2147	12
0.75941	1e-5	1e-5	1e-5	1e-5	1e-5	0.026847	1e-5	0.213654	1e-5	1e-5	1e-5	NA	NA	NA	MY2212	12
1e-5	1e-5	1e-5	1e-5	1e-5	1e-5	1e-5	1e-5	1e-5	1e-5	0.99989	1e-5	NA	NA	NA	MY23	12
0.129897	1e-5	1e-5	1e-5	1e-5	1e-5	1e-5	0.435728	0.423979	1e-5	1e-5	0.010316	NA	NA	NA	MY2453	12
0.718603	1e-5	1e-5	1e-5	1e-5	0.033979	1e-5	1e-5	0.186909	1e-5	1e-5	0.060428	NA	NA	NA	MY2530	12
0.702516	1e-5	1e-5	1e-5	1e-5	0.113303	1.2e-5	1e-5	0.142355	1e-5	1e-5	0.041744	NA	NA	NA	MY2535	12
1e-5	1e-5	1e-5	1e-5	1e-5	1e-5	1e-5	0.288738	0.711162	1e-5	1e-5	1e-5	NA	NA	NA	MY2573	12
0.99989	1e-5	1e-5	1e-5	1e-5	1e-5	1e-5	1e-5	1e-5	1e-5	1e-5	1e-5	NA	NA	NA	MY2585	12
0.973716	1e-5	1e-5	1e-5	1e-5	1e-5	0.026184	1e-5	1e-5	1e-5	1e-5	1e-5	NA	NA	NA	MY2693	12
0.99989	1e-5	1e-5	1e-5	1e-5	1e-5	1e-5	1e-5	1e-5	1e-5	1e-5	1e-5	NA	NA	NA	MY2713	12
0.380269	1e-5	1e-5	1e-5	1e-5	1e-5	0.436845	1e-5	0.182796	1e-5	1e-5	1e-5	NA	NA	NA	MY2741	12
1e-5	1e-5	1e-5	1e-5	1e-5	1e-5	0.949032	1e-5	1e-5	1e-5	1e-5	0.050868	NA	NA	NA	MY518	12
0.70846	1e-5	1e-5	1e-5	1e-5	0.29144	1e-5	1e-5	1e-5	1e-5	1e-5	1e-5	NA	NA	NA	MY679	12
0.22768	1e-5	1e-5	1e-5	1e-5	1e-5	1e-5	1e-5	0.745551	0.026679	1e-5	1e-5	NA	NA	NA	MY772	12
1e-5	1e-5	1e-5	1e-5	1e-5	1e-5	0.614162	0.167069	0.218678	1e-5	1e-5	1e-5	NA	NA	NA	MY795	12
0.77943	1e-5	1e-5	1e-5	1e-5	1e-5	1e-5	1e-5	0.22047	1e-5	1e-5	1e-5	NA	NA	NA	MY920	12
1e-5	1e-5	1.1e-5	1e-5	1e-5	1e-5	1e-5	0.999889	1e-5	1e-5	1e-5	1e-5	NA	NA	NA	N2	12
0.482258	1e-5	1e-5	1e-5	1e-5	1e-5	1e-5	1e-5	0.356322	1e-5	1e-5	0.16133	NA	NA	NA	NIC1	12
1e-5	1e-5	1e-5	1e-5	1e-5	1e-5	1e-5	0.316577	0.683323	1e-5	1e-5	1e-5	NA	NA	NA	NIC1049	12
1e-5	1e-5	1e-5	1e-5	1e-5	1e-5	1e-5	0.73675	0.26315	1e-5	1e-5	1e-5	NA	NA	NA	NIC1107	12
0.275683	1e-5	1e-5	1e-5	1e-5	0.285225	1e-5	1e-5	0.439003	1e-5	1e-5	1e-5	NA	NA	NA	NIC166	12
1e-5	1e-5	0.045711	0.269841	1e-5	0.319353	1e-5	0.102408	1e-5	0.181142	1e-5	0.081485	NA	NA	NA	NIC195	12
1e-5	1e-5	1e-5	0.482585	1e-5	0.175788	1e-5	1e-5	0.092233	0.249314	1e-5	1e-5	NA	NA	NA	NIC199	12
0.552114	1e-5	1e-5	1e-5	1e-5	1e-5	1e-5	0.447786	1e-5	1e-5	1e-5	1e-5	NA	NA	NA	NIC2	12
0.564479	1e-5	1e-5	1e-5	1e-5	1e-5	1e-5	0.051316	1e-5	1e-5	1e-5	0.384115	NA	NA	NA	NIC207	12
0.651657	1e-5	1e-5	1e-5	1e-5	0.021419	1e-5	1e-5	1e-5	1e-5	1e-5	0.326834	NA	NA	NA	NIC231	12
1e-5	1e-5	1e-5	1e-5	1e-5	1e-5	1e-5	1e-5	1e-5	1e-5	1e-5	0.99989	NA	NA	NA	NIC236	12
0.033788	1e-5	1e-5	1e-5	1e-5	1e-5	1e-5	0.415887	0.128179	1e-5	1e-5	0.422066	NA	NA	NA	NIC242	12
1e-5	1e-5	0.156091	0.738958	1e-5	1e-5	1e-5	0.095446	1e-5	0.009426	1e-5	1e-5	NA	NA	NA	NIC251	12
1e-5	1e-5	1e-5	1e-5	1e-5	0.883119	1e-5	1e-5	1e-5	1e-5	1e-5	0.116781	NA	NA	NA	NIC252	12
0.64595	1e-5	1e-5	1e-5	1e-5	1e-5	1e-5	0.215667	0.051388	1e-5	1e-5	0.086915	NA	NA	NA	NIC255	12
1e-5	1e-5	1e-5	0.324665	1e-5	1e-5	1e-5	1e-5	1e-5	1e-5	1e-5	0.675235	NA	NA	NA	NIC256	12
1e-5	1e-5	1e-5	0.99989	1e-5	1e-5	1e-5	1e-5	1e-5	1e-5	1e-5	1e-5	NA	NA	NA	NIC258	12
1e-5	1e-5	1e-5	1e-5	1e-5	1e-5	1e-5	1e-5	1e-5	1e-5	1e-5	0.99989	NA	NA	NA	NIC259	12
0.059196	1e-5	1e-5	0.562795	1e-5	0.129249	1e-5	1e-5	1e-5	1e-5	1e-5	0.24868	NA	NA	NA	NIC260	12
1e-5	1e-5	1e-5	0.64702	1e-5	1e-5	1e-5	1e-5	1e-5	1e-5	1e-5	0.35288	NA	NA	NA	NIC261	12
1e-5	1e-5	1e-5	0.444971	1e-5	1e-5	1e-5	1e-5	1e-5	1e-5	1e-5	0.554929	NA	NA	NA	NIC262	12
1e-5	1e-5	1e-5	0.99989	1e-5	1e-5	1e-5	1e-5	1e-5	1e-5	1e-5	1e-5	NA	NA	NA	NIC265	12
1e-5	1e-5	1e-5	0.039494	1e-5	0.705246	1e-5	0.25517	1e-5	1e-5	1e-5	1e-5	NA	NA	NA	NIC266	12
1e-5	1e-5	1e-5	1e-5	1e-5	0.99989	1e-5	1e-5	1e-5	1e-5	1e-5	1e-5	NA	NA	NA	NIC267	12
1e-5	1e-5	0.13815	1e-5	1e-5	0.66366	1e-5	1e-5	1e-5	1e-5	0.1981	1e-5	NA	NA	NA	NIC268	12
1e-5	1e-5	1e-5	1e-5	1e-5	0.510142	1e-5	1e-5	0.052783	0.091227	1e-5	0.345768	NA	NA	NA	NIC269	12
1e-5	1e-5	1e-5	0.339724	1e-5	1e-5	1e-5	1e-5	1e-5	1e-5	1e-5	0.660176	NA	NA	NA	NIC271	12
1e-5	1e-5	1e-5	1e-5	1e-5	0.877708	1e-5	1e-5	0.122192	1e-5	1e-5	1e-5	NA	NA	NA	NIC272	12
1e-5	1e-5	1e-5	1e-5	1e-5	0.99989	1e-5	1e-5	1e-5	1e-5	1e-5	1e-5	NA	NA	NA	NIC274	12
0.035241	1e-5	1e-5	1e-5	1e-5	0.703594	1e-5	1e-5	1e-5	1e-5	1e-5	0.261075	NA	NA	NA	NIC275	12
1e-5	1e-5	1e-5	1e-5	1e-5	0.99989	1e-5	1e-5	1e-5	1e-5	1e-5	1e-5	NA	NA	NA	NIC276	12
0.347471	1e-5	1e-5	1e-5	1e-5	1e-5	1e-5	1e-5	0.652429	1e-5	1e-5	1e-5	NA	NA	NA	NIC277	12
0.215406	1e-5	1e-5	1e-5	1e-5	0.082965	0.050243	1e-5	0.651307	1e-5	1e-5	1e-5	NA	NA	NA	NIC3	12
1e-5	1e-5	1e-5	1e-5	1e-5	1e-5	1e-5	1e-5	0.511893	0.488007	1e-5	1e-5	NA	NA	NA	NIC501	12
0.643408	1e-5	1e-5	1e-5	1e-5	1e-5	1e-5	0.005055	0.338458	0.013	1e-5	1e-5	NA	NA	NA	NIC511	12
1e-5	1e-5	1e-5	1.9e-5	1e-5	0.430365	1e-5	1e-5	1e-5	1e-5	1e-5	0.569526	NA	NA	NA	NIC513	12
1e-5	1e-5	1e-5	1e-5	1e-5	0.441057	1e-5	1e-5	1e-5	1e-5	1e-5	0.558843	NA	NA	NA	NIC514	12
0.296587	1e-5	1e-5	0.02926	1e-5	0.325789	1e-5	1e-5	1e-5	0.194875	1e-5	0.153419	NA	NA	NA	NIC515	12
0.423514	1e-5	1e-5	1e-5	1e-5	1e-5	1e-5	0.049335	1e-5	0.021749	1e-5	0.505323	NA	NA	NA	NIC522	12
0.398508	1e-5	1e-5	1e-5	1e-5	0.082141	1e-5	1e-5	1e-5	1e-5	0.090275	0.428996	NA	NA	NA	NIC523	12
0.391472	1e-5	1e-5	1e-5	1e-5	1e-5	1e-5	1e-5	0.04481	0.068954	1e-5	0.494684	NA	NA	NA	NIC526	12
0.147465	1e-5	1e-5	1e-5	1e-5	1e-5	1e-5	1e-5	0.207294	0.42107	1e-5	0.224091	NA	NA	NA	NIC527	12
0.789021	1e-5	1e-5	1e-5	1e-5	1e-5	1e-5	1e-5	1e-5	0.033772	1e-5	0.177116	NA	NA	NA	NIC528	12
0.609961	1e-5	1e-5	1e-5	1e-5	0.096994	1e-5	0.064496	0.076507	1e-5	1e-5	0.151973	NA	NA	NA	NIC529	12
0.83037	1e-5	1e-5	1e-5	1e-5	1e-5	0.16953	1e-5	1e-5	1e-5	1e-5	1e-5	NA	NA	NA	PB303	12
1e-5	1e-5	1e-5	1e-5	1e-5	1e-5	0.820954	1e-5	1.1e-5	1e-5	0.178944	1e-5	NA	NA	NA	PB306	12
1e-5	1.4e-5	1e-5	1e-5	1e-5	1e-5	0.472544	1e-5	1e-5	1e-5	0.527352	1e-5	NA	NA	NA	PS2025	12
0.71478	1e-5	1.4e-5	1.1e-5	1e-5	1.8e-5	1e-5	0.285107	1e-5	1e-5	1e-5	1e-5	NA	NA	NA	PX179	12
0.189881	1e-5	1e-5	0.066266	1e-5	0.129619	0.443722	0.014044	1e-5	0.156408	1e-5	1e-5	NA	NA	NA	QG2075	12
0.436985	1e-5	1e-5	1e-5	1e-5	0.152732	0.151377	1e-5	1.1e-5	1e-5	1e-5	0.258825	NA	NA	NA	QG536	12
0.058043	1e-5	1e-5	1e-5	1e-5	1e-5	0.31693	1e-5	1e-5	1e-5	0.624937	1e-5	NA	NA	NA	QG556	12
1e-5	1e-5	1.1e-5	1e-5	1e-5	1e-5	0.779848	1e-5	1e-5	1e-5	0.220051	1e-5	NA	NA	NA	QG557	12
0.401233	1e-5	1e-5	0.019236	0.051842	1e-5	1e-5	1e-5	1e-5	0.163571	1e-5	0.364048	NA	NA	NA	QW947	12
1e-5	1e-5	1e-5	1e-5	0.99989	1e-5	1e-5	1e-5	1e-5	1e-5	1e-5	1e-5	NA	NA	NA	QX1211	12
1e-5	1e-5	0.046587	1e-5	1e-5	1e-5	0.953313	1e-5	1e-5	1e-5	1e-5	1e-5	NA	NA	NA	QX1212	12
0.092126	1e-5	1e-5	1e-5	1e-5	1e-5	0.907774	1e-5	1e-5	1e-5	1e-5	1e-5	NA	NA	NA	QX1233	12
0.089952	1e-5	0.460257	1e-5	1e-5	1e-5	0.030294	0.106548	1e-5	0.050156	0.25005	0.012692	NA	NA	NA	QX1791	12
0.16439	1e-5	1e-5	1e-5	1e-5	1e-5	1e-5	1e-5	1e-5	1e-5	0.636139	0.199381	NA	NA	NA	QX1792	12
1e-5	1e-5	1e-5	1e-5	1e-5	1e-5	1e-5	1e-5	1e-5	1e-5	0.888412	0.111488	NA	NA	NA	QX1793	12
1e-5	1e-5	1e-5	1e-5	1e-5	1e-5	1e-5	1e-5	1e-5	1e-5	0.99989	1e-5	NA	NA	NA	QX1794	12
0.99989	1e-5	1e-5	1e-5	1e-5	1e-5	1e-5	1e-5	1e-5	1e-5	1e-5	1e-5	NA	NA	NA	RC301	12
0.234423	1e-5	1e-5	0.294891	1e-5	1e-5	0.227443	1e-5	1e-5	0.243163	1e-5	1e-5	NA	NA	NA	WN2001	12
0.540271	1e-5	1e-5	0.01605	1e-5	1e-5	1e-5	0.195681	1e-5	0.118934	1e-5	0.128995	NA	NA	NA	WN2002	12
0.528304	1e-5	1e-5	1e-5	1e-5	1e-5	0.471596	1e-5	1e-5	1e-5	1e-5	1e-5	NA	NA	NA	WN2033	12
1e-5	1e-5	1e-5	1e-5	1e-5	1e-5	1e-5	0.313612	1e-5	0.686288	1e-5	1e-5	NA	NA	NA	WN2050	12
1e-5	1e-5	1e-5	1e-5	1e-5	1e-5	1e-5	1e-5	1e-5	1e-5	0.99989	1e-5	NA	NA	NA	XZ1513	12
1e-5	1e-5	1e-5	1e-5	0.99989	1e-5	1e-5	1e-5	1e-5	1e-5	1e-5	1e-5	NA	NA	NA	XZ1514	12
1e-5	1e-5	0.182443	1e-5	0.064193	1e-5	0.265951	1e-5	1e-5	1e-5	0.487332	1e-5	NA	NA	NA	XZ1515	12
1e-5	1e-5	0.379522	1e-5	0.620378	1e-5	1e-5	1e-5	1e-5	1e-5	1e-5	1e-5	NA	NA	NA	XZ1516	12
1e-5	0.457146	1e-5	0.542764	1e-5	1e-5	1e-5	1e-5	1e-5	1e-5	1e-5	NA	NA	NA	NA	AB1	11
1e-5	1e-5	1e-5	0.999899	1e-5	1e-5	1e-5	1e-5	1.1e-5	1e-5	1e-5	NA	NA	NA	NA	BRC20067	11
0.142338	1e-5	0.019301	0.493992	1e-5	1e-5	1e-5	1e-5	1e-5	0.344299	1e-5	NA	NA	NA	NA	BRC20263	11
1e-5	0.9999	1e-5	1e-5	1e-5	1e-5	1e-5	1e-5	1e-5	1e-5	1e-5	NA	NA	NA	NA	CB4851	11
1e-5	0.207768	1e-5	0.792139	1.3e-5	1e-5	1e-5	1e-5	1e-5	1e-5	1e-5	NA	NA	NA	NA	CB4852	11
1e-5	1e-5	0.692965	0.306945	1e-5	1e-5	1e-5	1e-5	1e-5	1e-5	1e-5	NA	NA	NA	NA	CB4853	11
1e-5	1e-5	1e-5	0.533478	1e-5	1e-5	1e-5	1e-5	1e-5	0.466432	1e-5	NA	NA	NA	NA	CB4854	11
1e-5	1e-5	0.815787	0.184123	1e-5	1e-5	1e-5	1e-5	1e-5	1e-5	1e-5	NA	NA	NA	NA	CB4855	11
0.9999	1e-5	1e-5	1e-5	1e-5	1e-5	1e-5	1e-5	1e-5	1e-5	1e-5	NA	NA	NA	NA	CB4856	11
1e-5	1e-5	0.999899	1e-5	1e-5	1.1e-5	1e-5	1e-5	1e-5	1e-5	1e-5	NA	NA	NA	NA	CB4857	11
1e-5	1e-5	0.9999	1e-5	1e-5	1e-5	1e-5	1e-5	1e-5	1e-5	1e-5	NA	NA	NA	NA	CB4858	11
1.9e-5	0.604814	1e-5	1e-5	1e-5	1e-5	1e-5	1.1e-5	0.395086	1e-5	1e-5	NA	NA	NA	NA	CB4932	11
1e-5	1e-5	0.656296	1e-5	1e-5	1e-5	1e-5	1e-5	1e-5	0.237537	0.106087	NA	NA	NA	NA	CX11254	11
1e-5	1e-5	0.9999	1e-5	1e-5	1e-5	1e-5	1e-5	1e-5	1e-5	1e-5	NA	NA	NA	NA	CX11262	11
1e-5	1e-5	0.9999	1e-5	1e-5	1e-5	1e-5	1e-5	1e-5	1e-5	1e-5	NA	NA	NA	NA	CX11264	11
1e-5	1e-5	0.271679	0.286364	1e-5	1e-5	1e-5	1e-5	1e-5	0.441877	1e-5	NA	NA	NA	NA	CX11271	11
1e-5	0.015529	0.591298	0.185454	1e-5	1e-5	1e-5	1e-5	0.009696	0.197963	1e-5	NA	NA	NA	NA	CX11276	11
1.1e-5	1e-5	0.662305	1e-5	1e-5	1e-5	1e-5	1e-5	1e-5	0.337604	1e-5	NA	NA	NA	NA	CX11285	11
1e-5	1e-5	0.727048	0.272862	1e-5	1e-5	1e-5	1e-5	1e-5	1e-5	1e-5	NA	NA	NA	NA	CX11292	11
1e-5	1e-5	0.59957	0.183651	1e-5	1e-5	0.038083	1e-5	0.070271	0.057709	0.050666	NA	NA	NA	NA	CX11307	11
1e-5	1e-5	0.9999	1e-5	1e-5	1e-5	1e-5	1e-5	1e-5	1e-5	1e-5	NA	NA	NA	NA	CX11314	11
1e-5	1e-5	0.855784	0.144126	1e-5	1e-5	1e-5	1e-5	1e-5	1e-5	1e-5	NA	NA	NA	NA	CX11315	11
1e-5	1e-5	1e-5	0.174635	1e-5	1e-5	1e-5	1e-5	0.736236	0.026985	0.062074	NA	NA	NA	NA	DL200	11
1e-5	0.054011	0.722598	0.137152	1e-5	1e-5	1e-5	2e-5	1e-5	0.070261	0.015908	NA	NA	NA	NA	DL226	11
0.999898	1e-5	1e-5	1e-5	1e-5	1e-5	1e-5	1e-5	1.2e-5	1e-5	1e-5	NA	NA	NA	NA	DL238	11
1e-5	1e-5	0.157606	1e-5	0.842304	1e-5	1e-5	1e-5	1e-5	1e-5	1e-5	NA	NA	NA	NA	ECA189	11
1e-5	1e-5	1e-5	1e-5	1e-5	1e-5	1e-5	0.9999	1e-5	1e-5	1e-5	NA	NA	NA	NA	ECA191	11
1e-5	0.9999	1e-5	1e-5	1e-5	1e-5	1e-5	1e-5	1e-5	1e-5	1e-5	NA	NA	NA	NA	ECA252	11
1e-5	1e-5	1e-5	1e-5	1e-5	0.9999	1e-5	1e-5	1e-5	1e-5	1e-5	NA	NA	NA	NA	ECA347	11
1e-5	1e-5	0.9999	1e-5	1e-5	1e-5	1e-5	1e-5	1e-5	1e-5	1e-5	NA	NA	NA	NA	ECA348	11
1e-5	1e-5	0.9999	1e-5	1e-5	1e-5	1e-5	1e-5	1e-5	1e-5	1e-5	NA	NA	NA	NA	ECA349	11
1.3e-5	1.9e-5	1e-5	1e-5	1e-5	0.999888	1e-5	1e-5	1e-5	1e-5	1e-5	NA	NA	NA	NA	ECA36	11
1e-5	1e-5	1e-5	1e-5	1e-5	0.9999	1e-5	1e-5	1e-5	1e-5	1e-5	NA	NA	NA	NA	ECA363	11
0.9999	1e-5	1e-5	1e-5	1e-5	1e-5	1e-5	1e-5	1e-5	1e-5	1e-5	NA	NA	NA	NA	ECA369	11
1.8e-5	1e-5	0.232283	1e-5	0.766152	1e-5	1e-5	1e-5	1e-5	0.001477	1e-5	NA	NA	NA	NA	ECA372	11
1e-5	1e-5	1e-5	1e-5	1e-5	1e-5	1e-5	0.9999	1e-5	1e-5	1e-5	NA	NA	NA	NA	ECA396	11
0.250814	1e-5	1e-5	1e-5	1e-5	0.58748	1e-5	0.161626	1e-5	1e-5	1e-5	NA	NA	NA	NA	ECA701	11
0.9999	1e-5	1e-5	1e-5	1e-5	1e-5	1e-5	1e-5	1e-5	1e-5	1e-5	NA	NA	NA	NA	ECA703	11
1e-5	1e-5	1e-5	1e-5	0.9999	1e-5	1e-5	1e-5	1e-5	1e-5	1e-5	NA	NA	NA	NA	ECA705	11
0.856741	1e-5	1e-5	1e-5	0.143163	1e-5	1e-5	1.6e-5	1e-5	1e-5	1e-5	NA	NA	NA	NA	ECA706	11
1e-5	1e-5	0.071425	1e-5	0.928485	1e-5	1e-5	1e-5	1e-5	1e-5	1e-5	NA	NA	NA	NA	ECA710	11
1e-5	1e-5	1e-5	1e-5	0.9999	1e-5	1e-5	1e-5	1e-5	1e-5	1e-5	NA	NA	NA	NA	ECA712	11
1e-5	1e-5	1e-5	1e-5	1e-5	1e-5	1e-5	0.9999	1e-5	1e-5	1e-5	NA	NA	NA	NA	ECA722	11
1.3e-5	1.6e-5	1e-5	1e-5	1e-5	1e-5	1e-5	0.999884	1.7e-5	1e-5	1e-5	NA	NA	NA	NA	ECA723	11
1e-5	1e-5	0.008431	1e-5	1e-5	0.991476	1.3e-5	1e-5	1e-5	1e-5	1e-5	NA	NA	NA	NA	ECA724	11
1e-5	1e-5	1e-5	1e-5	1e-5	1e-5	1e-5	0.9999	1e-5	1e-5	1e-5	NA	NA	NA	NA	ECA730	11
0.9999	1e-5	1e-5	1e-5	1e-5	1e-5	1e-5	1e-5	1e-5	1e-5	1e-5	NA	NA	NA	NA	ECA732	11
0.9999	1e-5	1e-5	1e-5	1e-5	1e-5	1e-5	1e-5	1e-5	1e-5	1e-5	NA	NA	NA	NA	ECA733	11
1e-5	1e-5	0.279258	1e-5	0.720652	1e-5	1e-5	1e-5	1e-5	1e-5	1e-5	NA	NA	NA	NA	ECA738	11
1e-5	1e-5	1e-5	1e-5	1e-5	0.999895	1e-5	1e-5	1.5e-5	1e-5	1e-5	NA	NA	NA	NA	ECA740	11
1e-5	1e-5	1e-5	1e-5	1e-5	0.999898	1e-5	1.2e-5	1e-5	1e-5	1e-5	NA	NA	NA	NA	ECA741	11
1e-5	1.2e-5	1e-5	1e-5	1.3e-5	0.999881	1e-5	1.6e-5	1e-5	1.8e-5	1e-5	NA	NA	NA	NA	ECA742	11
1e-5	0.044726	0.025694	0.052205	0.84473	1e-5	1e-5	1e-5	0.032585	1e-5	1e-5	NA	NA	NA	NA	ECA743	11
1e-5	1e-5	1e-5	1e-5	1e-5	1e-5	1e-5	0.9999	1e-5	1e-5	1e-5	NA	NA	NA	NA	ECA744	11
1e-5	1e-5	1e-5	1.2e-5	1e-5	1e-5	1e-5	0.999898	1e-5	1e-5	1e-5	NA	NA	NA	NA	ECA745	11
1e-5	1e-5	1e-5	1e-5	1e-5	1e-5	1e-5	0.9999	1e-5	1e-5	1e-5	NA	NA	NA	NA	ECA746	11
1e-5	1e-5	1e-5	1e-5	0.9999	1e-5	1e-5	1e-5	1e-5	1e-5	1e-5	NA	NA	NA	NA	ECA760	11
1e-5	1e-5	1e-5	1.1e-5	0.999899	1e-5	1e-5	1e-5	1e-5	1e-5	1e-5	NA	NA	NA	NA	ECA768	11
1e-5	1e-5	1e-5	1e-5	0.999896	1e-5	1e-5	1e-5	1.4e-5	1e-5	1e-5	NA	NA	NA	NA	ECA777	11
1e-5	1e-5	1e-5	1e-5	0.999896	1e-5	1e-5	1e-5	1.4e-5	1e-5	1e-5	NA	NA	NA	NA	ECA778	11
1e-5	1e-5	1e-5	1e-5	0.9999	1e-5	1e-5	1e-5	1e-5	1e-5	1e-5	NA	NA	NA	NA	ECA807	11
1e-5	1e-5	1e-5	1e-5	0.999899	1e-5	1e-5	1.1e-5	1e-5	1e-5	1e-5	NA	NA	NA	NA	ECA812	11
1e-5	1e-5	0.262562	0.05976	1e-5	1e-5	1e-5	1e-5	1e-5	1e-5	0.677598	NA	NA	NA	NA	ED3005	11
1e-5	1e-5	0.335005	0.242701	1e-5	1e-5	1e-5	1e-5	1e-5	0.135938	0.286286	NA	NA	NA	NA	ED3011	11
1e-5	0.72135	1e-5	0.27856	1e-5	1e-5	1e-5	1e-5	1e-5	1e-5	1e-5	NA	NA	NA	NA	ED3012	11
1e-5	1e-5	1e-5	0.540785	1e-5	1e-5	1e-5	1e-5	0.459125	1e-5	1e-5	NA	NA	NA	NA	ED3017	11
1e-5	1e-5	1e-5	0.277931	1e-5	1e-5	1e-5	1e-5	1e-5	0.721979	1e-5	NA	NA	NA	NA	ED3040	11
1e-5	1e-5	1e-5	0.352974	1e-5	1e-5	1e-5	1e-5	0.1527	0.494246	1e-5	NA	NA	NA	NA	ED3046	11
1.4e-5	1.7e-5	1e-5	0.679556	1e-5	1e-5	1e-5	1e-5	1e-5	0.320344	1e-5	NA	NA	NA	NA	ED3048	11
1e-5	1e-5	1e-5	0.348489	1e-5	1e-5	1e-5	1e-5	0.148789	0.502642	1e-5	NA	NA	NA	NA	ED3049	11
1e-5	1e-5	1e-5	0.25064	1e-5	1e-5	1e-5	1e-5	1e-5	0.74927	1e-5	NA	NA	NA	NA	ED3052	11
1e-5	1e-5	1e-5	0.934359	1e-5	1e-5	1e-5	1e-5	1e-5	0.065551	1e-5	NA	NA	NA	NA	ED3073	11
1e-5	1e-5	1e-5	0.75534	1e-5	1e-5	0.002367	1e-5	0.034257	0.207966	1e-5	NA	NA	NA	NA	ED3077	11
1e-5	0.261096	0.063511	0.675313	1e-5	1e-5	1e-5	1e-5	1e-5	1e-5	1e-5	NA	NA	NA	NA	EG4347	11
1e-5	1e-5	1e-5	0.222824	1e-5	1e-5	0.014195	1e-5	0.193368	1e-5	0.569544	NA	NA	NA	NA	EG4349	11
1e-5	0.020153	1e-5	0.20714	1e-5	1e-5	1e-5	1e-5	0.124086	0.64855	1e-5	NA	NA	NA	NA	EG4724	11
1e-5	1e-5	1e-5	0.124487	1e-5	1e-5	0.282191	1e-5	1e-5	0.593241	1e-5	NA	NA	NA	NA	EG4725	11
1e-5	0.024101	0.406269	0.569549	1e-5	1e-5	1e-5	1.1e-5	1e-5	1e-5	1e-5	NA	NA	NA	NA	EG4946	11
1e-5	1e-5	1e-5	0.909434	1e-5	1e-5	1e-5	1e-5	1e-5	0.090476	1e-5	NA	NA	NA	NA	GXW1	11
1e-5	0.160151	1e-5	0.690335	1e-5	1e-5	1e-5	1e-5	0.110807	0.038637	1e-5	NA	NA	NA	NA	JT11398	11
1e-5	1e-5	1e-5	0.78102	1e-5	1e-5	1e-5	1e-5	1e-5	0.21889	1e-5	NA	NA	NA	NA	JU1088	11
1e-5	1e-5	0.765549	0.234361	1e-5	1e-5	1e-5	1e-5	1e-5	1e-5	1e-5	NA	NA	NA	NA	JU1172	11
1e-5	0.682998	1e-5	0.316912	1e-5	1e-5	1e-5	1e-5	1e-5	1e-5	1e-5	NA	NA	NA	NA	JU1200	11
0.08567	0.725328	1e-5	1e-5	1.1e-5	1e-5	1e-5	1e-5	0.188922	1e-5	1e-5	NA	NA	NA	NA	JU1212	11
1e-5	1e-5	1e-5	1e-5	1e-5	1e-5	1e-5	1e-5	0.9999	1e-5	1e-5	NA	NA	NA	NA	JU1213	11
1e-5	1e-5	1e-5	1e-5	1e-5	1e-5	1e-5	1e-5	0.9999	1e-5	1e-5	NA	NA	NA	NA	JU1242	11
1e-5	0.250224	1e-5	1e-5	1e-5	1e-5	1e-5	1e-5	0.749686	1e-5	1e-5	NA	NA	NA	NA	JU1246	11
1e-5	0.9999	1e-5	1e-5	1e-5	1e-5	1e-5	1e-5	1e-5	1e-5	1e-5	NA	NA	NA	NA	JU1249	11
1e-5	0.25326	1e-5	0.746648	1e-5	1e-5	1e-5	1.2e-5	1e-5	1e-5	1e-5	NA	NA	NA	NA	JU1395	11
1e-5	1e-5	1e-5	0.204082	1e-5	1e-5	0.045369	1e-5	0.370459	0.38002	1e-5	NA	NA	NA	NA	JU1400	11
1e-5	1e-5	1e-5	0.644812	1e-5	1e-5	1e-5	1e-5	0.152121	0.202986	1e-5	NA	NA	NA	NA	JU1409	11
1e-5	0.006749	1e-5	0.687095	1e-5	1e-5	1e-5	1e-5	0.18064	0.125447	1e-5	NA	NA	NA	NA	JU1440	11
1e-5	1e-5	1e-5	1e-5	1e-5	1e-5	1e-5	1e-5	0.364017	0.635893	1e-5	NA	NA	NA	NA	JU1491	11
1e-5	1e-5	1e-5	0.417306	1e-5	1e-5	1e-5	1e-5	0.582604	1e-5	1e-5	NA	NA	NA	NA	JU1530	11
1e-5	0.65206	1e-5	0.34785	1e-5	1e-5	1e-5	1e-5	1e-5	1e-5	1e-5	NA	NA	NA	NA	JU1543	11
1e-5	0.9999	1e-5	1e-5	1e-5	1e-5	1e-5	1e-5	1e-5	1e-5	1e-5	NA	NA	NA	NA	JU1568	11
1e-5	1e-5	1e-5	1e-5	1e-5	1e-5	1e-5	1e-5	0.9999	1e-5	1e-5	NA	NA	NA	NA	JU1580	11
0.067559	0.103112	1e-5	0.171678	1e-5	1e-5	1e-5	1e-5	0.65758	1e-5	1e-5	NA	NA	NA	NA	JU1581	11
1e-5	0.861778	1e-5	0.138132	1e-5	1e-5	1e-5	1e-5	1e-5	1e-5	1e-5	NA	NA	NA	NA	JU1586	11
1e-5	0.337599	1e-5	0.582993	1e-5	1e-5	0.079329	1e-5	1e-5	1e-5	1e-5	NA	NA	NA	NA	JU1652	11
1e-5	0.022996	1e-5	1e-5	1e-5	1e-5	1e-5	1e-5	0.976914	1e-5	1e-5	NA	NA	NA	NA	JU1666	11
1e-5	0.689435	1e-5	1e-5	1e-5	1e-5	1e-5	1e-5	0.310475	1e-5	1e-5	NA	NA	NA	NA	JU1792	11
1e-5	1e-5	1e-5	1e-5	1e-5	1e-5	1e-5	1e-5	0.9999	1e-5	1e-5	NA	NA	NA	NA	JU1793	11
1e-5	0.135212	2e-5	1e-5	1e-5	1e-5	1e-5	1e-5	0.179676	1e-5	0.685022	NA	NA	NA	NA	JU1808	11
0.031787	0.654548	1e-5	0.313585	1e-5	1e-5	1e-5	1e-5	1e-5	1e-5	1e-5	NA	NA	NA	NA	JU1896	11
1e-5	0.102256	1e-5	1e-5	1e-5	1e-5	1e-5	1e-5	0.897654	1e-5	1e-5	NA	NA	NA	NA	JU1934	11
0.199819	0.025318	1e-5	1e-5	1e-5	1.7e-5	1e-5	1e-5	0.524188	0.250599	1e-5	NA	NA	NA	NA	JU2001	11
0.018765	1e-5	1e-5	0.502314	1e-5	1e-5	1e-5	1e-5	0.182837	0.214345	0.081678	NA	NA	NA	NA	JU2007	11
1e-5	1e-5	0.686517	0.313393	1e-5	1e-5	1e-5	1e-5	1e-5	1e-5	1e-5	NA	NA	NA	NA	JU2016	11
0.130618	0.068426	0.40346	0.272208	1e-5	1e-5	1e-5	1e-5	1e-5	0.085963	0.039275	NA	NA	NA	NA	JU2017	11
0.0127	0.142023	1e-5	1e-5	1e-5	1e-5	1e-5	1e-5	0.845197	1e-5	1e-5	NA	NA	NA	NA	JU2106	11
1e-5	0.034485	1e-5	1e-5	1e-5	1e-5	1e-5	1e-5	0.831556	0.133879	1e-5	NA	NA	NA	NA	JU2131	11
1e-5	0.219596	1e-5	1e-5	1.1e-5	1.1e-5	1e-5	1e-5	0.780312	1e-5	1e-5	NA	NA	NA	NA	JU2141	11
1.58e-4	0.551605	1e-5	0.404098	1e-5	1e-5	0.044068	1e-5	1e-5	1e-5	1e-5	NA	NA	NA	NA	JU2234	11
1e-5	1e-5	1e-5	1e-5	1.8e-5	1e-5	1e-5	1e-5	0.999892	1e-5	1e-5	NA	NA	NA	NA	JU2250	11
1e-5	0.9999	1e-5	1e-5	1e-5	1e-5	1e-5	1e-5	1e-5	1e-5	1e-5	NA	NA	NA	NA	JU2257	11
1e-5	1e-5	1e-5	1e-5	1e-5	1e-5	0.999899	1e-5	1.1e-5	1e-5	1e-5	NA	NA	NA	NA	JU2316	11
1e-5	1e-5	1e-5	0.626128	1e-5	1e-5	1e-5	1e-5	0.144591	0.2292	1e-5	NA	NA	NA	NA	JU2464	11
1e-5	1e-5	1e-5	0.9999	1e-5	1e-5	1e-5	1e-5	1e-5	1e-5	1e-5	NA	NA	NA	NA	JU2466	11
1e-5	1e-5	0.344298	0.278516	1e-5	1e-5	1e-5	1e-5	0.377106	1e-5	1e-5	NA	NA	NA	NA	JU2478	11
1e-5	0.072771	1e-5	0.865712	1e-5	1e-5	1e-5	1e-5	0.020539	0.040909	1e-5	NA	NA	NA	NA	JU2513	11
1e-5	1.7e-5	1e-5	1e-5	1e-5	1e-5	0.713829	1e-5	1e-5	0.286074	1e-5	NA	NA	NA	NA	JU2519	11
1e-5	1e-5	1e-5	1e-5	1e-5	1e-5	1e-5	1e-5	1e-5	0.9999	1e-5	NA	NA	NA	NA	JU2522	11
1.1e-5	1e-5	1e-5	1.1e-5	1e-5	1e-5	0.999899	1e-5	1e-5	1e-5	1e-5	NA	NA	NA	NA	JU2526	11
1e-5	1e-5	1e-5	0.553552	1e-5	1e-5	1e-5	1e-5	0.446358	1e-5	1e-5	NA	NA	NA	NA	JU2534	11
1e-5	0.9999	1e-5	1e-5	1e-5	1e-5	1e-5	1e-5	1e-5	1e-5	1e-5	NA	NA	NA	NA	JU2565	11
1e-5	0.770245	1e-5	0.113902	1e-5	1e-5	1e-5	1e-5	0.115773	1e-5	1e-5	NA	NA	NA	NA	JU2566	11
1.2e-5	1.1e-5	1e-5	1e-5	1e-5	1e-5	1e-5	1e-5	0.999889	1.9e-5	1e-5	NA	NA	NA	NA	JU2570	11
1e-5	0.709448	1e-5	1e-5	1e-5	1e-5	1e-5	1e-5	0.290462	1e-5	1e-5	NA	NA	NA	NA	JU2572	11
1e-5	0.83492	1.5e-5	1e-5	1e-5	1e-5	1e-5	1.3e-5	0.164982	1e-5	1e-5	NA	NA	NA	NA	JU2575	11
0.091793	0.015965	1e-5	0.336444	1e-5	1e-5	1e-5	1e-5	0.554878	1e-5	8.6e-4	NA	NA	NA	NA	JU2576	11
1e-5	1e-5	1e-5	0.457496	1e-5	1e-5	1e-5	1e-5	1e-5	0.542414	1e-5	NA	NA	NA	NA	JU2578	11
0.132455	0.070774	1e-5	1e-5	1e-5	1e-5	0.351847	1e-5	0.097688	0.347177	1e-5	NA	NA	NA	NA	JU258	11
1e-5	1e-5	1e-5	1e-5	1e-5	1e-5	1e-5	1e-5	1e-5	1e-5	0.9999	NA	NA	NA	NA	JU2581	11
1e-5	1e-5	1e-5	0.154338	1e-5	1e-5	0.112716	1e-5	0.077208	0.655669	1e-5	NA	NA	NA	NA	JU2586	11
1e-5	1e-5	1e-5	0.1127	1e-5	1e-5	1e-5	1e-5	0.095606	1e-5	0.791614	NA	NA	NA	NA	JU2587	11
1e-5	0.816724	1e-5	1e-5	1e-5	1e-5	0.022935	1e-5	0.091148	0.069123	1e-5	NA	NA	NA	NA	JU2592	11
1e-5	1e-5	1e-5	1e-5	1e-5	1e-5	1e-5	1e-5	1e-5	1e-5	0.9999	NA	NA	NA	NA	JU2593	11
1e-5	1e-5	1e-5	0.002319	1e-5	1e-5	1e-5	1e-5	0.997591	1e-5	1e-5	NA	NA	NA	NA	JU2600	11
1e-5	1e-5	1e-5	0.003757	1e-5	1e-5	1e-5	1e-5	0.996153	1e-5	1e-5	NA	NA	NA	NA	JU2610	11
1e-5	1e-5	0.177774	0.674056	1e-5	1e-5	1e-5	1e-5	1e-5	0.148089	1e-5	NA	NA	NA	NA	JU2619	11
1e-5	0.467065	1e-5	0.159944	1e-5	1e-5	1e-5	1e-5	0.372911	1e-5	1e-5	NA	NA	NA	NA	JU2800	11
0.192454	1e-5	0.017396	0.454041	1e-5	1e-5	0.164015	1.4e-5	1e-5	0.17203	1e-5	NA	NA	NA	NA	JU2811	11
1e-5	0.9999	1e-5	1e-5	1e-5	1e-5	1e-5	1e-5	1e-5	1e-5	1e-5	NA	NA	NA	NA	JU2825	11
1e-5	1e-5	1e-5	1e-5	1e-5	1e-5	1e-5	1e-5	1e-5	1e-5	0.9999	NA	NA	NA	NA	JU2829	11
0.072467	1e-5	0.048379	1e-5	1e-5	1e-5	1e-5	1e-5	1e-5	0.547199	0.331886	NA	NA	NA	NA	JU2838	11
0.091283	1e-5	1e-5	0.605505	1e-5	1e-5	1e-5	1e-5	0.303132	1e-5	1e-5	NA	NA	NA	NA	JU2841	11
1e-5	0.254208	1e-5	0.379173	1e-5	1e-5	1e-5	1e-5	1e-5	0.366539	1e-5	NA	NA	NA	NA	JU2853	11
1e-5	0.003358	0.426445	0.334683	1e-5	1e-5	0.030298	1e-5	0.135274	0.069892	1e-5	NA	NA	NA	NA	JU2862	11
1e-5	1e-5	0.9999	1e-5	1e-5	1e-5	1e-5	1e-5	1e-5	1e-5	1e-5	NA	NA	NA	NA	JU2866	11
1e-5	1e-5	0.18473	0.617716	1e-5	1e-5	1e-5	1e-5	1e-5	0.197475	1e-5	NA	NA	NA	NA	JU2878	11
1e-5	1e-5	0.298322	0.076059	0.208736	1e-5	1e-5	1e-5	1e-5	1e-5	0.416813	NA	NA	NA	NA	JU2879	11
1e-5	0.215485	1e-5	0.520081	1e-5	1e-5	1e-5	1e-5	0.264353	1e-5	1e-5	NA	NA	NA	NA	JU2906	11
1e-5	0.520035	1e-5	0.479872	1e-5	1e-5	1.3e-5	1e-5	1e-5	1e-5	1e-5	NA	NA	NA	NA	JU2907	11
1e-5	1e-5	1e-5	0.412869	1e-5	1e-5	1e-5	1e-5	0.587041	1e-5	1e-5	NA	NA	NA	NA	JU310	11
1e-5	0.782558	1e-5	0.065245	1e-5	1e-5	1e-5	1e-5	0.140303	1e-5	0.011824	NA	NA	NA	NA	JU311	11
1e-5	0.159879	1e-5	0.383364	1e-5	1e-5	1e-5	1e-5	1e-5	0.456677	1e-5	NA	NA	NA	NA	JU3125	11
1e-5	0.18184	1e-5	0.208539	1e-5	1e-5	1e-5	1e-5	1e-5	0.60954	1e-5	NA	NA	NA	NA	JU3127	11
1e-5	0.002708	1e-5	0.758862	1e-5	1e-5	0.012627	1e-5	0.225733	1e-5	1e-5	NA	NA	NA	NA	JU3128	11
1e-5	1e-5	1e-5	1e-5	1e-5	1e-5	1e-5	1e-5	0.9999	1e-5	1e-5	NA	NA	NA	NA	JU3132	11
1e-5	0.016018	1e-5	0.76489	1e-5	1e-5	1e-5	1e-5	0.133263	0.085759	1e-5	NA	NA	NA	NA	JU3134	11
1.6e-5	1.2e-5	1e-5	0.999892	1e-5	1e-5	1e-5	1e-5	1e-5	1e-5	1e-5	NA	NA	NA	NA	JU3135	11
1e-5	0.162265	1e-5	0.090919	0.044108	1e-5	1e-5	1e-5	0.290968	0.41168	1e-5	NA	NA	NA	NA	JU3137	11
1.1e-5	1.4e-5	1e-5	1.1e-5	1e-5	1e-5	1e-5	1e-5	0.999887	1.7e-5	1e-5	NA	NA	NA	NA	JU3140	11
1e-5	1e-5	1e-5	0.322822	1e-5	1e-5	1e-5	1e-5	0.109345	0.20105	0.366712	NA	NA	NA	NA	JU3144	11
1e-5	1e-5	1e-5	0.372107	1e-5	1e-5	1e-5	1e-5	0.430619	0.197194	1e-5	NA	NA	NA	NA	JU323	11
1e-5	1e-5	1e-5	0.507458	1e-5	1e-5	1e-5	1e-5	0.492452	1e-5	1e-5	NA	NA	NA	NA	JU346	11
1e-5	1e-5	1e-5	0.386084	1e-5	1e-5	1e-5	1e-5	0.064104	1e-5	0.549732	NA	NA	NA	NA	JU360	11
1e-5	0.945253	1e-5	0.054657	1e-5	1e-5	1e-5	1e-5	1e-5	1e-5	1e-5	NA	NA	NA	NA	JU367	11
1e-5	0.159227	1e-5	1e-5	1e-5	1e-5	1e-5	1e-5	0.840683	1e-5	1e-5	NA	NA	NA	NA	JU393	11
1e-5	0.9999	1e-5	1e-5	1e-5	1e-5	1e-5	1e-5	1e-5	1e-5	1e-5	NA	NA	NA	NA	JU394	11
1e-5	0.211507	1e-5	1e-5	1.4e-5	1e-5	1e-5	1e-5	0.7884	1e-5	1e-5	NA	NA	NA	NA	JU397	11
1e-5	0.9999	1e-5	1e-5	1e-5	1e-5	1e-5	1e-5	1e-5	1e-5	1e-5	NA	NA	NA	NA	JU406	11
1e-5	0.648635	1e-5	0.205326	1e-5	1e-5	1e-5	1e-5	0.145959	1e-5	1e-5	NA	NA	NA	NA	JU440	11
1e-5	0.194369	1e-5	0.785725	1e-5	1e-5	1e-5	1e-5	0.019826	1e-5	1e-5	NA	NA	NA	NA	JU561	11
1e-5	1e-5	1e-5	0.505091	1e-5	1e-5	1e-5	1e-5	0.264312	0.230516	1e-5	NA	NA	NA	NA	JU642	11
1e-5	1e-5	1e-5	0.00738	1e-5	1e-5	1e-5	1e-5	1e-5	1e-5	0.99253	NA	NA	NA	NA	JU751	11
1e-5	1e-5	1e-5	0.288859	0.057705	1e-5	1e-5	1e-5	1e-5	0.653356	1e-5	NA	NA	NA	NA	JU774	11
1e-5	1e-5	1e-5	1e-5	1e-5	1e-5	0.9999	1e-5	1e-5	1e-5	1e-5	NA	NA	NA	NA	JU775	11
1e-5	1e-5	1e-5	1e-5	0.055318	1e-5	0.032413	1e-5	1e-5	0.912188	1e-5	NA	NA	NA	NA	JU778	11
1e-5	1e-5	1e-5	0.026341	1e-5	1e-5	0.66968	1e-5	1e-5	0.303899	1e-5	NA	NA	NA	NA	JU782	11
1e-5	1e-5	1e-5	1e-5	1.3e-5	1e-5	1e-5	1e-5	0.999897	1e-5	1e-5	NA	NA	NA	NA	JU792	11
1e-5	1.7e-5	1e-5	0.42004	1e-5	1.3e-5	1.6e-5	1e-5	1e-5	0.073057	0.506807	NA	NA	NA	NA	JU830	11
1e-5	0.165206	1e-5	0.267768	1e-5	1e-5	1e-5	1e-5	0.566412	5.44e-4	1e-5	NA	NA	NA	NA	JU847	11
1e-5	1e-5	0.066172	0.6276	1e-5	1e-5	1e-5	1e-5	0.02339	0.126669	0.15611	NA	NA	NA	NA	KR314	11
1e-5	1e-5	1e-5	1e-5	1e-5	1e-5	1e-5	1e-5	1e-5	0.9999	1e-5	NA	NA	NA	NA	LKC34	11
1e-5	0.9999	1e-5	1e-5	1e-5	1e-5	1e-5	1e-5	1e-5	1e-5	1e-5	NA	NA	NA	NA	LSJ1	11
1e-5	1e-5	1e-5	0.33299	1e-5	1e-5	1e-5	1e-5	1e-5	0.632621	0.03431	NA	NA	NA	NA	MY1	11
1e-5	1e-5	1e-5	0.624069	1e-5	1e-5	0.302755	1e-5	0.036305	0.036801	1e-5	NA	NA	NA	NA	MY10	11
1e-5	1e-5	1e-5	1e-5	0.120714	1e-5	1e-5	1e-5	1e-5	1e-5	0.879196	NA	NA	NA	NA	MY16	11
1e-5	1e-5	1e-5	1e-5	1e-5	1e-5	1e-5	1e-5	1e-5	1e-5	0.9999	NA	NA	NA	NA	MY18	11
1e-5	0.490751	1e-5	0.096592	1e-5	1e-5	1e-5	1e-5	0.412577	1e-5	1e-5	NA	NA	NA	NA	MY2147	11
1e-5	1e-5	1e-5	0.730147	1e-5	1e-5	1e-5	1e-5	0.122791	1e-5	0.146982	NA	NA	NA	NA	MY2212	11
1e-5	1e-5	1e-5	1e-5	0.510437	1e-5	1e-5	1e-5	1e-5	1e-5	0.489473	NA	NA	NA	NA	MY23	11
1e-5	0.509916	1e-5	0.10959	1e-5	1e-5	1e-5	1e-5	0.235805	0.086836	0.057793	NA	NA	NA	NA	MY2453	11
1e-5	1e-5	1e-5	0.780637	1e-5	1e-5	1e-5	1e-5	0.179515	0.039768	1e-5	NA	NA	NA	NA	MY2530	11
1e-5	1e-5	1e-5	0.756458	1e-5	1e-5	1e-5	1e-5	0.072714	0.170748	1e-5	NA	NA	NA	NA	MY2535	11
1e-5	0.340119	1e-5	1e-5	1e-5	1e-5	1e-5	1e-5	0.659791	1e-5	1e-5	NA	NA	NA	NA	MY2573	11
1e-5	1e-5	1e-5	0.999897	1e-5	1e-5	1.3e-5	1e-5	1e-5	1e-5	1e-5	NA	NA	NA	NA	MY2585	11
1e-5	1e-5	1e-5	0.960228	1e-5	1e-5	1e-5	1e-5	1e-5	1e-5	0.039682	NA	NA	NA	NA	MY2693	11
1e-5	1e-5	1e-5	0.999899	1e-5	1e-5	1.1e-5	1e-5	1e-5	1e-5	1e-5	NA	NA	NA	NA	MY2713	11
1e-5	1e-5	1e-5	0.333723	1e-5	1e-5	1e-5	1e-5	1e-5	1e-5	0.666187	NA	NA	NA	NA	MY2741	11
1e-5	1e-5	0.412856	0.069194	1e-5	1e-5	1e-5	1e-5	1e-5	0.065168	0.452711	NA	NA	NA	NA	MY518	11
1e-5	1e-5	1e-5	0.809122	1e-5	1e-5	1e-5	1e-5	1e-5	0.190788	1e-5	NA	NA	NA	NA	MY679	11
1e-5	0.007009	1e-5	0.285364	1e-5	1e-5	1e-5	1e-5	0.707546	1e-5	1e-5	NA	NA	NA	NA	MY772	11
1e-5	0.02245	1e-5	1e-5	1e-5	1e-5	1e-5	1e-5	1e-5	1e-5	0.97746	NA	NA	NA	NA	MY795	11
1e-5	1e-5	1e-5	0.804639	1e-5	1e-5	1e-5	1e-5	0.195271	1e-5	1e-5	NA	NA	NA	NA	MY920	11
1e-5	0.9999	1e-5	1e-5	1e-5	1e-5	1e-5	1e-5	1e-5	1e-5	1e-5	NA	NA	NA	NA	N2	11
1e-5	1e-5	1e-5	0.537592	1e-5	1e-5	1e-5	1e-5	0.391043	0.071285	1e-5	NA	NA	NA	NA	NIC1	11
1e-5	0.381514	1e-5	0.024945	1e-5	1e-5	1e-5	1e-5	0.593461	1e-5	1e-5	NA	NA	NA	NA	NIC1049	11
1e-5	0.794023	1.2e-5	1e-5	1e-5	1e-5	1e-5	1e-5	0.205885	1e-5	1e-5	NA	NA	NA	NA	NIC1107	11
1e-5	0.042248	1e-5	0.351926	1e-5	1e-5	1e-5	1e-5	0.375155	0.230601	1e-5	NA	NA	NA	NA	NIC166	11
0.240886	0.129079	1e-5	0.01215	1e-5	1e-5	0.274649	1e-5	0.029185	0.314001	1e-5	NA	NA	NA	NA	NIC195	11
0.133143	1e-5	1e-5	1e-5	1e-5	1e-5	0.467578	1e-5	0.27033	0.128879	1e-5	NA	NA	NA	NA	NIC199	11
1e-5	0.425122	1e-5	0.574788	1e-5	1e-5	1e-5	1e-5	1e-5	1e-5	1e-5	NA	NA	NA	NA	NIC2	11
1e-5	0.046455	1e-5	0.670979	1e-5	1.1e-5	1e-5	1e-5	0.201677	0.080818	1e-5	NA	NA	NA	NA	NIC207	11
1e-5	1e-5	1e-5	0.760836	0.045083	1e-5	1e-5	1e-5	1e-5	0.194002	1e-5	NA	NA	NA	NA	NIC231	11
1e-5	1e-5	1e-5	1e-5	1e-5	1e-5	1e-5	1e-5	0.045183	0.954727	1e-5	NA	NA	NA	NA	NIC236	11
1e-5	0.438872	1e-5	0.044505	1e-5	1e-5	1e-5	1e-5	0.205607	0.310945	1e-5	NA	NA	NA	NA	NIC242	11
0.253162	0.04759	1e-5	1e-5	1e-5	1e-5	0.699168	1e-5	1e-5	1e-5	1e-5	NA	NA	NA	NA	NIC251	11
0.068154	1e-5	1e-5	1e-5	1e-5	1e-5	1e-5	1e-5	1e-5	0.931756	1e-5	NA	NA	NA	NA	NIC252	11
1e-5	0.207636	1e-5	0.679449	1e-5	1e-5	1e-5	1e-5	0.112835	1e-5	1e-5	NA	NA	NA	NA	NIC255	11
1e-5	1e-5	1e-5	1e-5	1e-5	1e-5	0.641916	1e-5	1e-5	0.357994	1e-5	NA	NA	NA	NA	NIC256	11
1e-5	1e-5	1e-5	1e-5	1e-5	1e-5	0.999897	1e-5	1.3e-5	1e-5	1e-5	NA	NA	NA	NA	NIC258	11
1e-5	0.12168	1e-5	1e-5	1e-5	1e-5	0.175711	1e-5	0.165003	0.537535	1e-5	NA	NA	NA	NA	NIC259	11
1e-5	1e-5	1e-5	0.066757	1.5e-5	1e-5	0.701671	1e-5	1e-5	0.231487	1e-5	NA	NA	NA	NA	NIC260	11
1e-5	1e-5	1e-5	1e-5	1e-5	1e-5	0.9999	1e-5	1e-5	1e-5	1e-5	NA	NA	NA	NA	NIC261	11
1e-5	1e-5	1e-5	1e-5	1e-5	1e-5	0.871335	1e-5	1e-5	0.128575	1e-5	NA	NA	NA	NA	NIC262	11
1e-5	1e-5	1e-5	1.1e-5	1e-5	1e-5	0.999899	1e-5	1e-5	1e-5	1e-5	NA	NA	NA	NA	NIC265	11
0.028665	0.252131	1e-5	1e-5	1e-5	1e-5	0.04804	1e-5	1e-5	0.671094	1e-5	NA	NA	NA	NA	NIC266	11
1e-5	1e-5	1e-5	0.214366	1e-5	1e-5	1e-5	1e-5	1e-5	0.785544	1e-5	NA	NA	NA	NA	NIC267	11
0.368281	1e-5	0.049807	1e-5	0.048434	1e-5	1e-5	1e-5	1e-5	0.452486	0.080932	NA	NA	NA	NA	NIC268	11
1e-5	1e-5	1e-5	1e-5	1e-5	1e-5	1e-5	1.1e-5	0.163144	0.836765	1e-5	NA	NA	NA	NA	NIC269	11
1e-5	1e-5	1e-5	1e-5	1e-5	1e-5	0.691917	1e-5	1e-5	0.307993	1e-5	NA	NA	NA	NA	NIC271	11
1e-5	1e-5	1e-5	1e-5	1.1e-5	1e-5	1e-5	1e-5	0.031337	0.968573	1e-5	NA	NA	NA	NA	NIC272	11
1e-5	1e-5	1e-5	1e-5	1e-5	1e-5	1e-5	1e-5	1e-5	0.9999	1e-5	NA	NA	NA	NA	NIC274	11
1e-5	1e-5	1e-5	0.169383	1e-5	1e-5	1.1e-5	1e-5	1e-5	0.830526	1e-5	NA	NA	NA	NA	NIC275	11
1e-5	1e-5	1e-5	1e-5	1e-5	1e-5	1e-5	1e-5	1e-5	0.9999	1e-5	NA	NA	NA	NA	NIC276	11
1e-5	1e-5	1e-5	0.394955	1e-5	1e-5	1e-5	1e-5	0.604955	1e-5	1e-5	NA	NA	NA	NA	NIC277	11
1e-5	1e-5	0.021269	0.463088	1e-5	1e-5	1e-5	1e-5	0.484239	0.028997	0.002347	NA	NA	NA	NA	NIC3	11
1e-5	1e-5	1e-5	1e-5	1e-5	1e-5	1e-5	1e-5	0.9999	1e-5	1e-5	NA	NA	NA	NA	NIC501	11
1e-5	1e-5	1e-5	0.664857	1e-5	1e-5	1e-5	1e-5	0.335053	1e-5	1e-5	NA	NA	NA	NA	NIC511	11
1e-5	1e-5	1e-5	1e-5	1e-5	1e-5	1e-5	1e-5	1e-5	0.9999	1e-5	NA	NA	NA	NA	NIC513	11
1e-5	1e-5	1.8e-5	1e-5	1e-5	1e-5	1e-5	1e-5	1e-5	0.999892	1e-5	NA	NA	NA	NA	NIC514	11
1e-5	1e-5	1e-5	0.334146	1e-5	1e-5	0.051678	1e-5	0.196771	0.417336	1e-5	NA	NA	NA	NA	NIC515	11
1e-5	0.094386	1e-5	0.420282	1e-5	1e-5	0.050353	1e-5	0.198222	0.236696	1e-5	NA	NA	NA	NA	NIC522	11
1e-5	1e-5	1e-5	0.463138	0.143358	1.4e-5	0.020281	1e-5	1e-5	0.373149	1e-5	NA	NA	NA	NA	NIC523	11
1e-5	1e-5	1e-5	0.268203	1e-5	1e-5	0.079686	1e-5	0.14343	0.327151	0.18147	NA	NA	NA	NA	NIC526	11
1e-5	0.027725	1e-5	0.154581	1e-5	1e-5	0.036296	1e-5	0.624523	0.156816	1e-5	NA	NA	NA	NA	NIC527	11
1e-5	1e-5	1e-5	0.762944	1e-5	1e-5	1e-5	1e-5	0.062372	0.174604	1e-5	NA	NA	NA	NA	NIC528	11
1e-5	0.069957	1e-5	0.685008	1e-5	1e-5	1e-5	1e-5	0.070933	0.174032	1e-5	NA	NA	NA	NA	NIC529	11
1e-5	1e-5	0.1275	0.87241	1e-5	1e-5	1e-5	1e-5	1e-5	1e-5	1e-5	NA	NA	NA	NA	PB303	11
1e-5	1e-5	0.9999	1e-5	1e-5	1e-5	1e-5	1e-5	1e-5	1e-5	1e-5	NA	NA	NA	NA	PB306	11
1e-5	1e-5	0.9999	1e-5	1e-5	1e-5	1e-5	1e-5	1e-5	1e-5	1e-5	NA	NA	NA	NA	PS2025	11
1e-5	0.269674	1e-5	0.730226	1e-5	1e-5	2e-5	1e-5	1e-5	1e-5	1e-5	NA	NA	NA	NA	PX179	11
0.043366	0.007539	0.097807	0.24636	1e-5	1e-5	0.07614	1e-5	1e-5	0.142644	0.386104	NA	NA	NA	NA	QG2075	11
1e-5	1e-5	0.089958	0.522272	1e-5	1e-5	1e-5	1e-5	1e-5	0.38769	1e-5	NA	NA	NA	NA	QG536	11
1e-5	1e-5	0.860267	1e-5	0.139643	1e-5	1e-5	1e-5	1e-5	1e-5	1e-5	NA	NA	NA	NA	QG556	11
1e-5	1e-5	0.9999	1e-5	1e-5	1e-5	1e-5	1e-5	1e-5	1e-5	1e-5	NA	NA	NA	NA	QG557	11
1e-5	1e-5	1e-5	0.519928	1e-5	0.048502	0.172277	1e-5	0.259223	1e-5	1e-5	NA	NA	NA	NA	QW947	11
1e-5	1e-5	1e-5	1e-5	1e-5	0.9999	1e-5	1e-5	1e-5	1e-5	1e-5	NA	NA	NA	NA	QX1211	11
0.043174	1e-5	0.806142	1e-5	1e-5	1e-5	1e-5	1e-5	1e-5	1e-5	0.150604	NA	NA	NA	NA	QX1212	11
1e-5	1e-5	0.855445	0.144465	1e-5	1e-5	1e-5	1e-5	1e-5	1e-5	1e-5	NA	NA	NA	NA	QX1233	11
0.559108	0.107565	0.137053	1e-5	0.061847	1e-5	1e-5	1e-5	1e-5	1e-5	0.134366	NA	NA	NA	NA	QX1791	11
1e-5	1e-5	1e-5	0.220457	0.617955	1e-5	1e-5	1e-5	1e-5	0.161508	1e-5	NA	NA	NA	NA	QX1792	11
1e-5	1e-5	1e-5	1e-5	0.875683	1e-5	1e-5	1.2e-5	1e-5	0.124224	1e-5	NA	NA	NA	NA	QX1793	11
1e-5	1e-5	0.10701	0.037616	0.855294	1e-5	1e-5	1e-5	1e-5	1e-5	1e-5	NA	NA	NA	NA	QX1794	11
1e-5	1e-5	1e-5	0.9999	1e-5	1e-5	1e-5	1e-5	1e-5	1e-5	1e-5	NA	NA	NA	NA	RC301	11
0.035989	1e-5	1e-5	1e-5	1e-5	1e-5	0.261792	1e-5	0.032126	1e-5	0.670023	NA	NA	NA	NA	WN2001	11
1e-5	0.235821	1e-5	0.611919	1e-5	1e-5	0.148065	1e-5	0.004125	1e-5	1e-5	NA	NA	NA	NA	WN2002	11
1e-5	1e-5	1e-5	0.495533	1e-5	1e-5	1e-5	1e-5	1e-5	1e-5	0.504377	NA	NA	NA	NA	WN2033	11
0.004214	0.388676	1e-5	1e-5	1e-5	1e-5	1e-5	1e-5	0.60703	1e-5	1e-5	NA	NA	NA	NA	WN2050	11
1e-5	1e-5	0.156637	1e-5	0.843273	1e-5	1e-5	1e-5	1e-5	1e-5	1e-5	NA	NA	NA	NA	XZ1513	11
1e-5	1.2e-5	1e-5	1e-5	1e-5	0.999894	1e-5	1e-5	1.3e-5	1e-5	1e-5	NA	NA	NA	NA	XZ1514	11
1e-5	1e-5	0.334387	1e-5	0.569182	0.096351	1e-5	1e-5	1e-5	1e-5	1e-5	NA	NA	NA	NA	XZ1515	11
0.174719	1e-5	1e-5	1e-5	1e-5	0.624136	1e-5	0.201065	1e-5	1e-5	1e-5	NA	NA	NA	NA	XZ1516	11
0.578715	1e-5	1e-5	0.421205	1e-5	1e-5	1e-5	1e-5	1e-5	1e-5	NA	NA	NA	NA	NA	AB1	10
1e-5	1e-5	1e-5	0.99991	1e-5	1e-5	1e-5	1e-5	1e-5	1e-5	NA	NA	NA	NA	NA	BRC20067	10
1e-5	1.8e-5	1e-5	0.554392	1e-5	1e-5	1e-5	0.297173	0.148357	1e-5	NA	NA	NA	NA	NA	BRC20263	10
0.999908	1e-5	1e-5	1e-5	1.1e-5	1.1e-5	1e-5	1e-5	1e-5	1e-5	NA	NA	NA	NA	NA	CB4851	10
0.372199	1e-5	1e-5	0.627721	1e-5	1e-5	1e-5	1e-5	1e-5	1e-5	NA	NA	NA	NA	NA	CB4852	10
1e-5	1e-5	1e-5	0.819394	0.161437	1e-5	1e-5	0.019098	1e-5	1e-5	NA	NA	NA	NA	NA	CB4853	10
1e-5	1e-5	1e-5	0.508234	1e-5	1e-5	1e-5	0.491686	1e-5	1e-5	NA	NA	NA	NA	NA	CB4854	10
1e-5	1e-5	1e-5	0.751956	0.247964	1e-5	1e-5	1e-5	1e-5	1e-5	NA	NA	NA	NA	NA	CB4855	10
1e-5	1e-5	1e-5	1e-5	1e-5	1e-5	1e-5	1e-5	0.99991	1e-5	NA	NA	NA	NA	NA	CB4856	10
1e-5	1e-5	1e-5	0.728469	0.271451	1e-5	1e-5	1e-5	1e-5	1e-5	NA	NA	NA	NA	NA	CB4857	10
1e-5	1e-5	1e-5	0.99991	1e-5	1e-5	1e-5	1e-5	1e-5	1e-5	NA	NA	NA	NA	NA	CB4858	10
0.593297	1e-5	0.406623	1e-5	1e-5	1e-5	1e-5	1e-5	1e-5	1e-5	NA	NA	NA	NA	NA	CB4932	10
1e-5	1e-5	1e-5	0.33845	0.39265099999999997	1e-5	1.1e-5	0.268827	1e-5	1e-5	NA	NA	NA	NA	NA	CX11254	10
1e-5	1e-5	1e-5	0.465831	0.534089	1e-5	1e-5	1e-5	1e-5	1e-5	NA	NA	NA	NA	NA	CX11262	10
1e-5	1e-5	1e-5	0.241967	0.757949	1e-5	1e-5	1.1e-5	1.2e-5	1e-5	NA	NA	NA	NA	NA	CX11264	10
1e-5	1e-5	1e-5	0.586875	1e-5	1e-5	1e-5	0.413045	1e-5	1e-5	NA	NA	NA	NA	NA	CX11271	10
0.028089	1e-5	1e-5	0.493936	0.218249	1e-5	1e-5	0.259666	1e-5	1e-5	NA	NA	NA	NA	NA	CX11276	10
1e-5	1e-5	1e-5	0.235806	0.417311	1e-5	1e-5	0.346813	1e-5	1e-5	NA	NA	NA	NA	NA	CX11285	10
1e-5	1e-5	1e-5	0.99991	1e-5	1e-5	1e-5	1e-5	1e-5	1e-5	NA	NA	NA	NA	NA	CX11292	10
1e-5	1e-5	0.057772	0.419735	0.369777	1e-5	1e-5	0.135805	1e-5	0.016861	NA	NA	NA	NA	NA	CX11307	10
1e-5	1e-5	1e-5	0.682209	0.31771	1e-5	1.1e-5	1e-5	1e-5	1e-5	NA	NA	NA	NA	NA	CX11314	10
1.5e-5	1e-5	1e-5	0.632455	0.36746	1e-5	1e-5	1e-5	1e-5	1e-5	NA	NA	NA	NA	NA	CX11315	10
1e-5	1e-5	0.760589	0.220116	1e-5	1e-5	1e-5	0.019225	1e-5	1e-5	NA	NA	NA	NA	NA	DL200	10
0.030024	1e-5	1e-5	0.585763	0.320817	1e-5	1e-5	0.063336	1e-5	1e-5	NA	NA	NA	NA	NA	DL226	10
1e-5	1e-5	1e-5	1e-5	1e-5	1e-5	1e-5	1e-5	0.99991	1e-5	NA	NA	NA	NA	NA	DL238	10
1e-5	0.148637	1e-5	1e-5	0.851283	1e-5	1e-5	1e-5	1e-5	1e-5	NA	NA	NA	NA	NA	ECA189	10
1e-5	1e-5	1e-5	1e-5	1e-5	0.999907	1.3e-5	1e-5	1e-5	1e-5	NA	NA	NA	NA	NA	ECA191	10
0.99991	1e-5	1e-5	1e-5	1e-5	1e-5	1e-5	1e-5	1e-5	1e-5	NA	NA	NA	NA	NA	ECA252	10
1e-5	1e-5	1e-5	1e-5	1e-5	1e-5	0.99991	1e-5	1e-5	1e-5	NA	NA	NA	NA	NA	ECA347	10
1e-5	1e-5	1e-5	0.109732	0.867079	1e-5	1e-5	0.02312	1e-5	1e-5	NA	NA	NA	NA	NA	ECA348	10
1e-5	1e-5	1e-5	0.516315	0.483594	1.6e-5	1.5e-5	1e-5	1e-5	1e-5	NA	NA	NA	NA	NA	ECA349	10
1e-5	1e-5	1e-5	1e-5	1e-5	1e-5	0.99991	1e-5	1e-5	1e-5	NA	NA	NA	NA	NA	ECA36	10
1e-5	1e-5	1e-5	1e-5	1.2e-5	1e-5	0.999908	1e-5	1e-5	1e-5	NA	NA	NA	NA	NA	ECA363	10
1e-5	1e-5	1e-5	1e-5	1e-5	1e-5	1e-5	1e-5	0.99991	1e-5	NA	NA	NA	NA	NA	ECA369	10
1e-5	0.073503	1e-5	1e-5	0.882405	1e-5	1e-5	0.044022	1e-5	1e-5	NA	NA	NA	NA	NA	ECA372	10
1e-5	1e-5	1e-5	1e-5	1e-5	0.99991	1e-5	1e-5	1e-5	1e-5	NA	NA	NA	NA	NA	ECA396	10
1e-5	1e-5	1e-5	1e-5	1e-5	0.162766	0.588407	1e-5	0.248758	1e-5	NA	NA	NA	NA	NA	ECA701	10
1e-5	1e-5	1e-5	1e-5	1e-5	1e-5	1e-5	1e-5	0.99991	1e-5	NA	NA	NA	NA	NA	ECA703	10
1e-5	0.004158	1e-5	1e-5	0.995762	1e-5	1e-5	1e-5	1e-5	1e-5	NA	NA	NA	NA	NA	ECA705	10
1e-5	0.159798	1e-5	1e-5	1e-5	1e-5	1e-5	1e-5	0.840122	1e-5	NA	NA	NA	NA	NA	ECA706	10
1e-5	0.215408	1e-5	1e-5	0.751707	1e-5	1e-5	1e-5	0.032815	1e-5	NA	NA	NA	NA	NA	ECA710	10
1e-5	0.99991	1e-5	1e-5	1e-5	1e-5	1e-5	1e-5	1e-5	1e-5	NA	NA	NA	NA	NA	ECA712	10
1e-5	1e-5	1e-5	1e-5	1e-5	0.999909	1e-5	1e-5	1.1e-5	1e-5	NA	NA	NA	NA	NA	ECA722	10
1e-5	1e-5	1e-5	1e-5	1e-5	0.99991	1e-5	1e-5	1e-5	1e-5	NA	NA	NA	NA	NA	ECA723	10
1e-5	1e-5	1e-5	1e-5	1e-5	1e-5	0.99991	1e-5	1e-5	1e-5	NA	NA	NA	NA	NA	ECA724	10
1e-5	1e-5	1e-5	1e-5	1e-5	0.99991	1e-5	1e-5	1e-5	1e-5	NA	NA	NA	NA	NA	ECA730	10
1e-5	1e-5	1e-5	1e-5	1e-5	1e-5	1e-5	1e-5	0.99991	1e-5	NA	NA	NA	NA	NA	ECA732	10
1e-5	1e-5	1e-5	1e-5	1e-5	1e-5	1e-5	1e-5	0.99991	1e-5	NA	NA	NA	NA	NA	ECA733	10
1e-5	0.121533	1e-5	1e-5	0.878387	1e-5	1e-5	1e-5	1e-5	1e-5	NA	NA	NA	NA	NA	ECA738	10
1e-5	1e-5	1e-5	1e-5	1e-5	1e-5	0.99991	1e-5	1e-5	1e-5	NA	NA	NA	NA	NA	ECA740	10
1e-5	1e-5	1e-5	1e-5	1e-5	1e-5	0.99991	1e-5	1e-5	1e-5	NA	NA	NA	NA	NA	ECA741	10
1e-5	1e-5	1e-5	1e-5	1e-5	1e-5	0.99991	1e-5	1e-5	1e-5	NA	NA	NA	NA	NA	ECA742	10
0.029475	1e-5	0.073307	1e-5	0.878644	1e-5	1e-5	0.018512	1.2e-5	1e-5	NA	NA	NA	NA	NA	ECA743	10
1e-5	1e-5	1e-5	1e-5	1e-5	0.99991	1e-5	1e-5	1e-5	1e-5	NA	NA	NA	NA	NA	ECA744	10
1e-5	1e-5	1e-5	1e-5	1e-5	0.99991	1e-5	1e-5	1e-5	1e-5	NA	NA	NA	NA	NA	ECA745	10
1e-5	1e-5	1e-5	1e-5	1e-5	0.99991	1e-5	1e-5	1e-5	1e-5	NA	NA	NA	NA	NA	ECA746	10
1e-5	0.99991	1e-5	1e-5	1e-5	1e-5	1e-5	1e-5	1e-5	1e-5	NA	NA	NA	NA	NA	ECA760	10
1e-5	0.99991	1e-5	1e-5	1e-5	1e-5	1e-5	1e-5	1e-5	1e-5	NA	NA	NA	NA	NA	ECA768	10
1e-5	0.99991	1e-5	1e-5	1e-5	1e-5	1e-5	1e-5	1e-5	1e-5	NA	NA	NA	NA	NA	ECA777	10
1.7e-5	0.999903	1e-5	1e-5	1e-5	1e-5	1e-5	1e-5	1e-5	1e-5	NA	NA	NA	NA	NA	ECA778	10
1e-5	0.999908	1e-5	1.2e-5	1e-5	1e-5	1e-5	1e-5	1e-5	1e-5	NA	NA	NA	NA	NA	ECA807	10
1e-5	0.99991	1e-5	1e-5	1e-5	1e-5	1e-5	1e-5	1e-5	1e-5	NA	NA	NA	NA	NA	ECA812	10
1e-5	1e-5	1e-5	0.99991	1e-5	1e-5	1e-5	1e-5	1e-5	1e-5	NA	NA	NA	NA	NA	ED3005	10
1e-5	1e-5	1e-5	0.845752	1e-5	1e-5	1e-5	0.154168	1e-5	1e-5	NA	NA	NA	NA	NA	ED3011	10
0.805181	1e-5	1e-5	0.194739	1e-5	1e-5	1e-5	1e-5	1e-5	1e-5	NA	NA	NA	NA	NA	ED3012	10
0.080878	1e-5	0.500865	0.418187	1e-5	1e-5	1e-5	1e-5	1e-5	1e-5	NA	NA	NA	NA	NA	ED3017	10
1e-5	1e-5	1e-5	0.194704	1e-5	1e-5	1e-5	0.805216	1e-5	1e-5	NA	NA	NA	NA	NA	ED3040	10
1e-5	1e-5	0.179872	0.235938	1e-5	1e-5	1e-5	0.58412	1e-5	1e-5	NA	NA	NA	NA	NA	ED3046	10
1e-5	1e-5	1e-5	0.70249	1e-5	1e-5	1e-5	0.29743000000000003	1e-5	1e-5	NA	NA	NA	NA	NA	ED3048	10
1e-5	1e-5	0.174469	0.239535	1e-5	1e-5	1e-5	0.585925	1e-5	1e-5	NA	NA	NA	NA	NA	ED3049	10
1e-5	1e-5	1e-5	0.21151	1e-5	1e-5	1e-5	0.78841	1e-5	1e-5	NA	NA	NA	NA	NA	ED3052	10
1e-5	1e-5	1e-5	0.900029	1e-5	1e-5	1e-5	0.099891	1e-5	1e-5	NA	NA	NA	NA	NA	ED3073	10
1e-5	1e-5	0.04227	0.725443	1e-5	1e-5	1e-5	0.211315	1e-5	0.020912	NA	NA	NA	NA	NA	ED3077	10
0.409555	1e-5	1e-5	0.590365	1e-5	1e-5	1e-5	1e-5	1e-5	1e-5	NA	NA	NA	NA	NA	EG4347	10
1e-5	1e-5	0.25523	0.586235	1e-5	1e-5	1e-5	0.05339	1e-5	0.105085	NA	NA	NA	NA	NA	EG4349	10
0.03421	1e-5	0.130538	0.18256	1e-5	1e-5	1e-5	0.647387	1e-5	0.005255	NA	NA	NA	NA	NA	EG4724	10
1e-5	1e-5	1e-5	0.06378	1e-5	1e-5	1e-5	0.629608	1e-5	0.306542	NA	NA	NA	NA	NA	EG4725	10
0.073521	1e-5	1e-5	0.926399	1e-5	1e-5	1e-5	1e-5	1e-5	1e-5	NA	NA	NA	NA	NA	EG4946	10
1e-5	1e-5	1e-5	0.836788	1e-5	1e-5	1e-5	0.163132	1e-5	1e-5	NA	NA	NA	NA	NA	GXW1	10
0.275601	1e-5	0.182586	0.422599	1e-5	1e-5	1e-5	0.119154	1e-5	1e-5	NA	NA	NA	NA	NA	JT11398	10
1e-5	1e-5	1e-5	0.752584	1e-5	1e-5	1e-5	0.247336	1e-5	1e-5	NA	NA	NA	NA	NA	JU1088	10
1e-5	1e-5	1e-5	0.99991	1e-5	1e-5	1e-5	1e-5	1e-5	1e-5	NA	NA	NA	NA	NA	JU1172	10
0.790057	1e-5	1e-5	0.209863	1e-5	1e-5	1e-5	1e-5	1e-5	1e-5	NA	NA	NA	NA	NA	JU1200	10
0.701819	1e-5	0.187406	1e-5	1e-5	1e-5	1e-5	1e-5	0.110705	1e-5	NA	NA	NA	NA	NA	JU1212	10
1e-5	1e-5	0.99991	1e-5	1e-5	1e-5	1e-5	1e-5	1e-5	1e-5	NA	NA	NA	NA	NA	JU1213	10
1e-5	1e-5	0.99991	1e-5	1e-5	1e-5	1e-5	1e-5	1e-5	1e-5	NA	NA	NA	NA	NA	JU1242	10
0.246055	1e-5	0.753865	1e-5	1e-5	1e-5	1e-5	1e-5	1e-5	1e-5	NA	NA	NA	NA	NA	JU1246	10
0.99991	1e-5	1e-5	1e-5	1e-5	1e-5	1e-5	1e-5	1e-5	1e-5	NA	NA	NA	NA	NA	JU1249	10
0.418954	1e-5	1e-5	0.580966	1e-5	1e-5	1e-5	1e-5	1e-5	1e-5	NA	NA	NA	NA	NA	JU1395	10
1e-5	1e-5	0.41053	0.111333	1e-5	1e-5	1e-5	0.434538	1e-5	0.043539	NA	NA	NA	NA	NA	JU1400	10
1e-5	1e-5	0.187421	0.591371	1e-5	1e-5	1e-5	0.221138	1e-5	1e-5	NA	NA	NA	NA	NA	JU1409	10
0.055711	1e-5	0.263177	0.578209	1e-5	1e-5	1e-5	0.102843	1e-5	1e-5	NA	NA	NA	NA	NA	JU1440	10
1e-5	1e-5	0.350477	1e-5	1e-5	1e-5	1e-5	0.649443	1e-5	1e-5	NA	NA	NA	NA	NA	JU1491	10
1e-5	1e-5	0.639157	0.360763	1e-5	1e-5	1e-5	1e-5	1e-5	1e-5	NA	NA	NA	NA	NA	JU1530	10
0.767204	1e-5	1e-5	0.232716	1e-5	1e-5	1e-5	1e-5	1e-5	1e-5	NA	NA	NA	NA	NA	JU1543	10
0.99991	1e-5	1e-5	1e-5	1e-5	1e-5	1e-5	1e-5	1e-5	1e-5	NA	NA	NA	NA	NA	JU1568	10
1e-5	1e-5	0.99991	1e-5	1e-5	1e-5	1e-5	1e-5	1e-5	1e-5	NA	NA	NA	NA	NA	JU1580	10
0.161625	1e-5	0.72029	0.031948	1e-5	1e-5	1e-5	1e-5	0.086077	1e-5	NA	NA	NA	NA	NA	JU1581	10
0.99991	1e-5	1e-5	1e-5	1e-5	1e-5	1e-5	1e-5	1e-5	1e-5	NA	NA	NA	NA	NA	JU1586	10
0.388198	1e-5	0.046466	0.45016	1e-5	1e-5	1e-5	0.04935	0.03236	0.033427	NA	NA	NA	NA	NA	JU1652	10
1e-5	1e-5	0.99991	1e-5	1e-5	1e-5	1e-5	1e-5	1e-5	1e-5	NA	NA	NA	NA	NA	JU1666	10
0.67476	1e-5	0.32516	1e-5	1e-5	1e-5	1e-5	1e-5	1e-5	1e-5	NA	NA	NA	NA	NA	JU1792	10
1e-5	1e-5	0.99991	1e-5	1e-5	1e-5	1e-5	1e-5	1e-5	1e-5	NA	NA	NA	NA	NA	JU1793	10
0.226733	1e-5	0.286782	0.486415	1e-5	1e-5	1e-5	1e-5	1e-5	1e-5	NA	NA	NA	NA	NA	JU1808	10
0.740303	1e-5	1e-5	0.182466	1e-5	1e-5	1e-5	1e-5	0.077161	1e-5	NA	NA	NA	NA	NA	JU1896	10
0.085868	1e-5	0.914052	1e-5	1e-5	1e-5	1e-5	1e-5	1e-5	1e-5	NA	NA	NA	NA	NA	JU1934	10
0.014154	1e-5	0.514009	1e-5	1.6e-5	1e-5	1e-5	0.264983	0.206789	1e-5	NA	NA	NA	NA	NA	JU2001	10
1e-5	1e-5	0.199905	0.550968	1e-5	1e-5	1e-5	0.183523	0.044635	0.020919	NA	NA	NA	NA	NA	JU2007	10
1e-5	1.9e-5	1e-5	0.9999	1e-5	1e-5	1e-5	1e-5	1.1e-5	1e-5	NA	NA	NA	NA	NA	JU2016	10
0.062733	1e-5	1e-5	0.522858	0.210293	1e-5	1e-5	0.084109	0.119958	1e-5	NA	NA	NA	NA	NA	JU2017	10
0.138644	1e-5	0.831311	1e-5	1e-5	1e-5	1e-5	1e-5	0.029975	1e-5	NA	NA	NA	NA	NA	JU2106	10
0.022857	1e-5	0.826387	1e-5	1e-5	1e-5	1e-5	0.150686	1e-5	1e-5	NA	NA	NA	NA	NA	JU2131	10
0.218587	1e-5	0.78133300000000006	1e-5	1e-5	1e-5	1e-5	1e-5	1e-5	1e-5	NA	NA	NA	NA	NA	JU2141	10
0.61277	1e-5	1e-5	0.258314	1e-5	1e-5	1e-5	0.042285	0.045483	0.041099	NA	NA	NA	NA	NA	JU2234	10
1e-5	1e-5	0.99991	1e-5	1e-5	1e-5	1e-5	1e-5	1e-5	1e-5	NA	NA	NA	NA	NA	JU2250	10
0.99991	1e-5	1e-5	1e-5	1e-5	1e-5	1e-5	1e-5	1e-5	1e-5	NA	NA	NA	NA	NA	JU2257	10
1e-5	1e-5	1e-5	1e-5	1e-5	1e-5	1e-5	1e-5	1e-5	0.99991	NA	NA	NA	NA	NA	JU2316	10
1e-5	1e-5	0.149118	0.58548	1e-5	1e-5	1e-5	0.265332	1e-5	1e-5	NA	NA	NA	NA	NA	JU2464	10
1e-5	1e-5	1e-5	0.99991	1e-5	1e-5	1e-5	1e-5	1e-5	1e-5	NA	NA	NA	NA	NA	JU2466	10
1e-5	1e-5	0.387278	0.612642	1e-5	1e-5	1e-5	1e-5	1e-5	1e-5	NA	NA	NA	NA	NA	JU2478	10
0.135747	1e-5	0.03147	0.785802	1.3e-5	1e-5	1.8e-5	0.046909	1e-5	1e-5	NA	NA	NA	NA	NA	JU2513	10
1e-5	1e-5	1e-5	1e-5	1e-5	1e-5	1e-5	0.269801	1e-5	0.730119	NA	NA	NA	NA	NA	JU2519	10
1e-5	1e-5	1e-5	1e-5	1e-5	1e-5	1e-5	0.99991	1e-5	1e-5	NA	NA	NA	NA	NA	JU2522	10
1e-5	1e-5	1e-5	1e-5	1e-5	1e-5	1e-5	1e-5	1e-5	0.99991	NA	NA	NA	NA	NA	JU2526	10
1e-5	1e-5	0.52916	0.47076	1e-5	1e-5	1e-5	1e-5	1e-5	1e-5	NA	NA	NA	NA	NA	JU2534	10
0.999904	1.6e-5	1e-5	1e-5	1e-5	1e-5	1e-5	1e-5	1e-5	1e-5	NA	NA	NA	NA	NA	JU2565	10
0.782348	1e-5	0.117433	0.10015	1e-5	1e-5	1e-5	1e-5	1e-5	1e-5	NA	NA	NA	NA	NA	JU2566	10
1e-5	1e-5	0.99991	1e-5	1e-5	1e-5	1e-5	1e-5	1e-5	1e-5	NA	NA	NA	NA	NA	JU2570	10
0.697149	1e-5	0.302771	1e-5	1e-5	1e-5	1e-5	1e-5	1e-5	1e-5	NA	NA	NA	NA	NA	JU2572	10
0.860548	1e-5	0.13937	1e-5	1e-5	1.2e-5	1e-5	1e-5	1e-5	1e-5	NA	NA	NA	NA	NA	JU2575	10
0.030078	1e-5	0.635708	0.234396	1e-5	1e-5	1e-5	1e-5	0.099757	1e-5	NA	NA	NA	NA	NA	JU2576	10
1e-5	1e-5	1e-5	0.470759	1e-5	1e-5	1e-5	0.529161	1e-5	1e-5	NA	NA	NA	NA	NA	JU2578	10
0.058003	1e-5	0.118308	1e-5	1e-5	1e-5	1e-5	0.330593	0.145635	0.347411	NA	NA	NA	NA	NA	JU258	10
1e-5	1e-5	0.008517	0.643083	0.348331	1e-5	1e-5	1e-5	1e-5	1e-5	NA	NA	NA	NA	NA	JU2581	10
1e-5	1e-5	0.07811	0.112724	1e-5	1e-5	1e-5	0.683682	1e-5	0.125424	NA	NA	NA	NA	NA	JU2586	10
1e-5	1e-5	0.172321	0.725154	1e-5	1e-5	1e-5	0.067824	1e-5	0.034641	NA	NA	NA	NA	NA	JU2587	10
0.813712	1e-5	0.087684	1e-5	1e-5	1e-5	1e-5	0.06216	1e-5	0.036384	NA	NA	NA	NA	NA	JU2592	10
1e-5	0.017967	0.105035	0.697756	0.179182	1e-5	1e-5	1e-5	1e-5	1e-5	NA	NA	NA	NA	NA	JU2593	10
1e-5	1e-5	0.99991	1e-5	1e-5	1e-5	1e-5	1e-5	1e-5	1e-5	NA	NA	NA	NA	NA	JU2600	10
1e-5	1e-5	0.99991	1e-5	1e-5	1e-5	1e-5	1e-5	1e-5	1e-5	NA	NA	NA	NA	NA	JU2610	10
1e-5	1e-5	1e-5	0.76682	0.020606	1e-5	1e-5	0.192303	0.020212	1e-5	NA	NA	NA	NA	NA	JU2619	10
0.502979	1e-5	0.428419	0.068533	1e-5	1e-5	1e-5	1e-5	1e-5	1e-5	NA	NA	NA	NA	NA	JU2800	10
1e-5	1e-5	1e-5	0.449217	1e-5	1e-5	1e-5	0.176774	0.208226	0.165724	NA	NA	NA	NA	NA	JU2811	10
0.99991	1e-5	1e-5	1e-5	1e-5	1e-5	1e-5	1e-5	1e-5	1e-5	NA	NA	NA	NA	NA	JU2825	10
1e-5	1e-5	0.024149	0.709585	0.238985	1e-5	1e-5	1e-5	1e-5	0.027221	NA	NA	NA	NA	NA	JU2829	10
1e-5	1e-5	0.051683	0.075144	0.243944	1e-5	1e-5	0.585792	0.043386	1e-5	NA	NA	NA	NA	NA	JU2838	10
1e-5	1e-5	0.353118	0.510621	1e-5	1e-5	1e-5	1e-5	0.136191	1e-5	NA	NA	NA	NA	NA	JU2841	10
0.287386	1e-5	1e-5	0.339925	1e-5	1e-5	1e-5	0.372619	1e-5	1e-5	NA	NA	NA	NA	NA	JU2853	10
0.004365	1e-5	0.170747	0.600329	0.047717	1e-5	1e-5	0.138099	1e-5	0.038704	NA	NA	NA	NA	NA	JU2862	10
1e-5	1e-5	1e-5	0.531979	0.467941	1e-5	1e-5	1e-5	1e-5	1e-5	NA	NA	NA	NA	NA	JU2866	10
1e-5	1e-5	1e-5	0.672138	0.10327	1e-5	1e-5	0.224522	1e-5	1e-5	NA	NA	NA	NA	NA	JU2878	10
1e-5	1e-5	1e-5	0.346008	0.653912	1e-5	1e-5	1e-5	1e-5	1e-5	NA	NA	NA	NA	NA	JU2879	10
0.328258	1e-5	0.343012	0.328661	1e-5	1e-5	1e-5	1e-5	1e-5	1e-5	NA	NA	NA	NA	NA	JU2906	10
0.620088	1e-5	1e-5	0.379832	1e-5	1e-5	1e-5	1e-5	1e-5	1e-5	NA	NA	NA	NA	NA	JU2907	10
1e-5	1e-5	0.643417	0.356491	1.8e-5	1e-5	1.4e-5	1e-5	1e-5	1e-5	NA	NA	NA	NA	NA	JU310	10
0.809367	1e-5	0.131657	0.058906	1e-5	1e-5	1e-5	1e-5	1e-5	1e-5	NA	NA	NA	NA	NA	JU311	10
0.232916	1e-5	1e-5	0.262275	1e-5	1e-5	1e-5	0.504739	1e-5	1e-5	NA	NA	NA	NA	NA	JU3125	10
0.220685	1e-5	1e-5	0.158979	1e-5	1e-5	1e-5	0.620266	1e-5	1e-5	NA	NA	NA	NA	NA	JU3127	10
0.074144	1e-5	0.309125	0.594129	1e-5	1e-5	1e-5	1e-5	1e-5	0.022542	NA	NA	NA	NA	NA	JU3128	10
1e-5	1e-5	0.99991	1e-5	1e-5	1e-5	1e-5	1e-5	1e-5	1e-5	NA	NA	NA	NA	NA	JU3132	10
0.032296	1e-5	0.22459	0.652732	1.8e-5	1.4e-5	1e-5	0.090305	1.6e-5	1e-5	NA	NA	NA	NA	NA	JU3134	10
1e-5	1e-5	1e-5	0.99991	1e-5	1e-5	1e-5	1e-5	1e-5	1e-5	NA	NA	NA	NA	NA	JU3135	10
0.177245	1e-5	0.301567	1e-5	1e-5	1e-5	1e-5	0.497971	0.023157	1e-5	NA	NA	NA	NA	NA	JU3137	10
1e-5	1e-5	0.99991	1e-5	1e-5	1e-5	1e-5	1e-5	1e-5	1e-5	NA	NA	NA	NA	NA	JU3140	10
1e-5	1e-5	0.261935	0.485363	1e-5	1e-5	1e-5	0.252631	1e-5	1e-5	NA	NA	NA	NA	NA	JU3144	10
1e-5	1e-5	0.470155	0.335668	1e-5	1e-5	1e-5	0.194107	1e-5	1e-5	NA	NA	NA	NA	NA	JU323	10
1e-5	1e-5	0.661739	0.338181	1e-5	1e-5	1e-5	1e-5	1e-5	1e-5	NA	NA	NA	NA	NA	JU346	10
1e-5	1e-5	0.228884	0.722081	0.013607	1e-5	1e-5	1e-5	1e-5	0.035368	NA	NA	NA	NA	NA	JU360	10
0.949099	1e-5	1e-5	0.050821	1e-5	1e-5	1e-5	1e-5	1e-5	1e-5	NA	NA	NA	NA	NA	JU367	10
0.13018	1e-5	0.86974	1e-5	1e-5	1e-5	1e-5	1e-5	1e-5	1e-5	NA	NA	NA	NA	NA	JU393	10
0.999907	1.1e-5	1e-5	1e-5	1e-5	1e-5	1e-5	1e-5	1.1e-5	1e-5	NA	NA	NA	NA	NA	JU394	10
0.203894	1e-5	0.796026	1e-5	1e-5	1e-5	1e-5	1e-5	1e-5	1e-5	NA	NA	NA	NA	NA	JU397	10
0.99991	1e-5	1e-5	1e-5	1e-5	1e-5	1e-5	1e-5	1e-5	1e-5	NA	NA	NA	NA	NA	JU406	10
0.742819	1e-5	0.156535	0.100576	1e-5	1e-5	1e-5	1e-5	1e-5	1e-5	NA	NA	NA	NA	NA	JU440	10
0.309852	1e-5	0.048771	0.612343	1e-5	1e-5	1e-5	0.028974	1e-5	1e-5	NA	NA	NA	NA	NA	JU561	10
1e-5	1e-5	0.358195	0.391366	1e-5	1e-5	1e-5	0.250369	1e-5	1e-5	NA	NA	NA	NA	NA	JU642	10
1e-5	1e-5	0.149865	0.730486	0.084483	1e-5	1e-5	1e-5	1e-5	0.035106	NA	NA	NA	NA	NA	JU751	10
1e-5	0.053376	1e-5	0.279784	1e-5	1e-5	1e-5	0.66677	1e-5	1e-5	NA	NA	NA	NA	NA	JU774	10
1e-5	1e-5	1e-5	1e-5	1e-5	1e-5	1.1e-5	1e-5	1e-5	0.999909	NA	NA	NA	NA	NA	JU775	10
1e-5	0.021079	1e-5	1e-5	1e-5	1e-5	1e-5	0.940159	1e-5	0.038692	NA	NA	NA	NA	NA	JU778	10
1e-5	1e-5	1e-5	1e-5	1e-5	1e-5	1e-5	0.302949	1e-5	0.696971	NA	NA	NA	NA	NA	JU782	10
1e-5	1e-5	0.999908	1.2e-5	1e-5	1e-5	1e-5	1e-5	1e-5	1e-5	NA	NA	NA	NA	NA	JU792	10
1e-5	1e-5	0.055453	0.854579	1e-5	1e-5	1e-5	0.089898	1e-5	1e-5	NA	NA	NA	NA	NA	JU830	10
0.182489	1e-5	0.588507	0.212986	1e-5	1e-5	1e-5	0.015959	1e-5	1e-5	NA	NA	NA	NA	NA	JU847	10
1e-5	1e-5	0.069263	0.830202	1e-5	1e-5	1e-5	0.100466	1e-5	1e-5	NA	NA	NA	NA	NA	KR314	10
1e-5	1e-5	1e-5	1e-5	1e-5	1e-5	1e-5	0.99991	1e-5	1e-5	NA	NA	NA	NA	NA	LKC34	10
0.999906	1e-5	1e-5	1e-5	1e-5	1.4e-5	1e-5	1e-5	1e-5	1e-5	NA	NA	NA	NA	NA	LSJ1	10
1e-5	1e-5	1e-5	0.398114	1e-5	1e-5	1e-5	0.601806	1e-5	1e-5	NA	NA	NA	NA	NA	MY1	10
1e-5	1e-5	0.073449	0.515828	1e-5	1e-5	1e-5	0.132793	0.031308	0.246571	NA	NA	NA	NA	NA	MY10	10
0.272081	1e-5	0.060178	1e-5	0.667663	1e-5	1.9e-5	1e-5	1e-5	1e-5	NA	NA	NA	NA	NA	MY16	10
0.109452	1e-5	0.181898	0.643734	1e-5	1e-5	1e-5	1e-5	0.064856	1e-5	NA	NA	NA	NA	NA	MY18	10
0.535017	1e-5	0.464903	1e-5	1e-5	1e-5	1e-5	1e-5	1e-5	1e-5	NA	NA	NA	NA	NA	MY2147	10
0.046394	1e-5	0.228217	0.725318	1e-5	1e-5	1e-5	1e-5	1e-5	1e-5	NA	NA	NA	NA	NA	MY2212	10
1e-5	1e-5	1e-5	1e-5	0.99991	1e-5	1e-5	1e-5	1e-5	1e-5	NA	NA	NA	NA	NA	MY23	10
0.540355	1e-5	0.245406	0.093	1e-5	1e-5	1e-5	0.121179	1e-5	1e-5	NA	NA	NA	NA	NA	MY2453	10
0.071997	1e-5	0.221505	0.699703	1.1e-5	1e-5	1e-5	0.006734	1e-5	1e-5	NA	NA	NA	NA	NA	MY2530	10
1e-5	1e-5	0.191796	0.67876	1e-5	1e-5	1e-5	0.129375	1e-5	1e-5	NA	NA	NA	NA	NA	MY2535	10
0.33617	1.7e-5	0.663743	1e-5	1e-5	1e-5	1e-5	1e-5	1e-5	1e-5	NA	NA	NA	NA	NA	MY2573	10
1e-5	1e-5	1e-5	0.98238	1e-5	1e-5	1e-5	1e-5	1e-5	0.01754	NA	NA	NA	NA	NA	MY2585	10
1e-5	1e-5	1e-5	0.99991	1e-5	1e-5	1e-5	1e-5	1e-5	1e-5	NA	NA	NA	NA	NA	MY2693	10
1e-5	1e-5	1e-5	0.99991	1e-5	1e-5	1e-5	1e-5	1e-5	1e-5	NA	NA	NA	NA	NA	MY2713	10
0.110232	1e-5	0.095528	0.78685	0.00733	1e-5	1e-5	1e-5	1e-5	1e-5	NA	NA	NA	NA	NA	MY2741	10
1e-5	1e-5	1e-5	0.967172	1e-5	1e-5	1e-5	0.032748	1e-5	1e-5	NA	NA	NA	NA	NA	MY518	10
1e-5	1e-5	1e-5	0.819625	1e-5	1e-5	1e-5	0.180295	1e-5	1e-5	NA	NA	NA	NA	NA	MY679	10
0.069244	1e-5	0.80716	0.123526	1e-5	1e-5	1e-5	1e-5	1e-5	1e-5	NA	NA	NA	NA	NA	MY772	10
0.239657	1e-5	0.092239	0.614055	0.053989	1e-5	1e-5	1e-5	1e-5	1e-5	NA	NA	NA	NA	NA	MY795	10
0.135294	1e-5	0.226265	0.638371	1e-5	1e-5	1e-5	1e-5	1e-5	1e-5	NA	NA	NA	NA	NA	MY920	10
0.999899	1e-5	1.4e-5	1e-5	1e-5	1.7e-5	1e-5	1e-5	1e-5	1e-5	NA	NA	NA	NA	NA	N2	10
0.047507	1e-5	0.399789	0.40787	1e-5	1e-5	1e-5	0.129419	1e-5	0.015364	NA	NA	NA	NA	NA	NIC1	10
0.386086	1e-5	0.600528	1e-5	1e-5	1e-5	1e-5	0.013316	1e-5	1e-5	NA	NA	NA	NA	NA	NIC1049	10
0.805026	1e-5	0.194892	1e-5	1e-5	1e-5	1.2e-5	1e-5	1e-5	1e-5	NA	NA	NA	NA	NA	NIC1107	10
0.066704	1e-5	0.443621	0.252228	1e-5	1e-5	1e-5	0.237387	1e-5	1e-5	NA	NA	NA	NA	NA	NIC166	10
0.133507	1e-5	1e-5	1e-5	1e-5	1e-5	1e-5	0.320286	0.306679	0.239468	NA	NA	NA	NA	NA	NIC195	10
1e-5	1e-5	0.268617	1e-5	1e-5	1e-5	1e-5	0.094834	0.146849	0.48964	NA	NA	NA	NA	NA	NIC199	10
0.545597	1e-5	1e-5	0.454323	1e-5	1e-5	1e-5	1e-5	1e-5	1e-5	NA	NA	NA	NA	NA	NIC2	10
0.13315	1e-5	0.248588	0.523109	1e-5	1e-5	1e-5	0.095089	1.4e-5	1e-5	NA	NA	NA	NA	NA	NIC207	10
1e-5	0.024704	1e-5	0.713658	1e-5	1e-5	1e-5	0.261568	1e-5	1e-5	NA	NA	NA	NA	NA	NIC231	10
1e-5	1e-5	0.045646	1e-5	1e-5	1e-5	1e-5	0.954274	1e-5	1e-5	NA	NA	NA	NA	NA	NIC236	10
0.44522	1e-5	0.236156	1.2e-5	1e-5	1e-5	1e-5	0.318552	1e-5	1e-5	NA	NA	NA	NA	NA	NIC242	10
0.021554	1e-5	1e-5	1e-5	1e-5	1e-5	1e-5	1e-5	0.296482	0.681894	NA	NA	NA	NA	NA	NIC251	10
1e-5	1e-5	1e-5	1e-5	1e-5	1e-5	1e-5	0.91202	0.0879	1e-5	NA	NA	NA	NA	NA	NIC252	10
0.309471	1e-5	0.148835	0.541624	1e-5	1e-5	1e-5	1e-5	1e-5	1e-5	NA	NA	NA	NA	NA	NIC255	10
1e-5	1e-5	1e-5	1e-5	1e-5	1e-5	1e-5	0.334085	1e-5	0.665835	NA	NA	NA	NA	NA	NIC256	10
1e-5	1e-5	1e-5	1e-5	1e-5	1e-5	1e-5	1e-5	1e-5	0.99991	NA	NA	NA	NA	NA	NIC258	10
0.095147	1e-5	0.163585	1e-5	1e-5	1e-5	1e-5	0.558264	1e-5	0.182943	NA	NA	NA	NA	NA	NIC259	10
1e-5	1e-5	1e-5	0.046032000000000003	1e-5	1e-5	1e-5	0.247102	1e-5	0.706795	NA	NA	NA	NA	NA	NIC260	10
1e-5	1e-5	1e-5	1.4e-5	1e-5	1e-5	1e-5	1e-5	1e-5	0.999906	NA	NA	NA	NA	NA	NIC261	10
1e-5	1e-5	1e-5	1e-5	1e-5	1e-5	1e-5	0.107344	1e-5	0.892576	NA	NA	NA	NA	NA	NIC262	10
1e-5	1e-5	1e-5	1e-5	1e-5	1e-5	1e-5	1e-5	1e-5	0.99991	NA	NA	NA	NA	NA	NIC265	10
0.251294	1e-5	1e-5	1e-5	1e-5	1e-5	1e-5	0.640275	0.042216	0.066155	NA	NA	NA	NA	NA	NIC266	10
1e-5	1e-5	1e-5	0.246765	1e-5	1e-5	1e-5	0.753155	1e-5	1e-5	NA	NA	NA	NA	NA	NIC267	10
1e-5	1e-5	1e-5	1e-5	0.212594	1e-5	1e-5	0.481877	0.305459	1e-5	NA	NA	NA	NA	NA	NIC268	10
1e-5	1e-5	0.171099	1e-5	1e-5	1e-5	1e-5	0.828821	1e-5	1e-5	NA	NA	NA	NA	NA	NIC269	10
1e-5	1e-5	1e-5	1e-5	1e-5	1e-5	1e-5	0.280647	1e-5	0.719273	NA	NA	NA	NA	NA	NIC271	10
1e-5	1e-5	0.044565	1e-5	1e-5	1e-5	1e-5	0.955355	1e-5	1e-5	NA	NA	NA	NA	NA	NIC272	10
1e-5	1e-5	1e-5	1e-5	1e-5	1e-5	1e-5	0.99991	1e-5	1e-5	NA	NA	NA	NA	NA	NIC274	10
1e-5	1e-5	1e-5	0.071006	1e-5	1e-5	1e-5	0.928914	1e-5	1e-5	NA	NA	NA	NA	NA	NIC275	10
1e-5	1e-5	1e-5	1e-5	1e-5	1e-5	1e-5	0.99991	1e-5	1e-5	NA	NA	NA	NA	NA	NIC276	10
1e-5	1e-5	0.663709	0.336211	1e-5	1e-5	1e-5	1e-5	1e-5	1e-5	NA	NA	NA	NA	NA	NIC277	10
1e-5	1e-5	0.559331	0.440028	1e-5	1e-5	1e-5	5.71e-4	1e-5	1e-5	NA	NA	NA	NA	NA	NIC3	10
1e-5	1e-5	0.99991	1e-5	1e-5	1e-5	1e-5	1e-5	1e-5	1e-5	NA	NA	NA	NA	NA	NIC501	10
0.115674	1e-5	0.481309	0.402947	1e-5	1e-5	1e-5	1e-5	1e-5	1e-5	NA	NA	NA	NA	NA	NIC511	10
1e-5	1e-5	1e-5	1e-5	1e-5	1e-5	1e-5	0.99991	1e-5	1e-5	NA	NA	NA	NA	NA	NIC513	10
1e-5	1e-5	1e-5	1e-5	1e-5	1e-5	1e-5	0.99991	1e-5	1e-5	NA	NA	NA	NA	NA	NIC514	10
1e-5	1e-5	0.207888	0.316209	1e-5	1e-5	1e-5	0.409367	1e-5	0.066476	NA	NA	NA	NA	NA	NIC515	10
0.11844	1.7e-5	0.29299	0.290656	1e-5	1e-5	1e-5	0.247397	1e-5	0.05046	NA	NA	NA	NA	NA	NIC522	10
1e-5	1e-5	1e-5	0.370639	0.142337	1e-5	1e-5	0.450607	1e-5	0.036357	NA	NA	NA	NA	NA	NIC523	10
1e-5	1e-5	0.24538	0.307996	1e-5	1e-5	1e-5	0.352177	1e-5	0.094386	NA	NA	NA	NA	NA	NIC526	10
0.023444	1e-5	0.66524	0.113074	1e-5	1e-5	1e-5	0.166899	1e-5	0.031293	NA	NA	NA	NA	NA	NIC527	10
1e-5	1e-5	0.152849	0.68975	1e-5	1e-5	1e-5	0.15733	1e-5	1e-5	NA	NA	NA	NA	NA	NIC528	10
0.046046	1e-5	0.212588	0.544523	1e-5	1e-5	1e-5	0.196783	1e-5	1e-5	NA	NA	NA	NA	NA	NIC529	10
1e-5	1e-5	1e-5	0.99991	1e-5	1e-5	1e-5	1e-5	1e-5	1e-5	NA	NA	NA	NA	NA	PB303	10
1e-5	1e-5	1e-5	0.353434	0.646486	1e-5	1e-5	1e-5	1e-5	1e-5	NA	NA	NA	NA	NA	PB306	10
1e-5	1e-5	1e-5	0.163061	0.836859	1e-5	1e-5	1e-5	1e-5	1e-5	NA	NA	NA	NA	NA	PS2025	10
0.410237	1e-5	1e-5	0.589683	1e-5	1e-5	1e-5	1e-5	1e-5	1e-5	NA	NA	NA	NA	NA	PX179	10
0.023057	1e-5	1e-5	0.652458	0.047144	1e-5	1e-5	0.074414	0.097138	0.105749	NA	NA	NA	NA	NA	QG2075	10
1e-5	1e-5	1e-5	0.584103	1e-5	1e-5	1e-5	0.415817	1e-5	1e-5	NA	NA	NA	NA	NA	QG536	10
1e-5	1e-5	1e-5	0.200833	0.799087	1e-5	1e-5	1e-5	1e-5	1e-5	NA	NA	NA	NA	NA	QG556	10
1e-5	1.2e-5	1e-5	0.528223	0.471695	1e-5	1e-5	1e-5	1e-5	1e-5	NA	NA	NA	NA	NA	QG557	10
0.00934	1e-5	0.276364	0.494451	1e-5	1e-5	0.050882	1e-5	1e-5	0.168913	NA	NA	NA	NA	NA	QW947	10
1e-5	1e-5	1e-5	1e-5	1e-5	1e-5	0.99991	1e-5	1e-5	1e-5	NA	NA	NA	NA	NA	QX1211	10
1e-5	1e-5	1e-5	0.763625	0.172838	1e-5	1e-5	1e-5	0.063467	1e-5	NA	NA	NA	NA	NA	QX1212	10
1e-5	1e-5	1e-5	0.647608	0.352312	1e-5	1e-5	1e-5	1e-5	1e-5	NA	NA	NA	NA	NA	QX1233	10
0.121846	1e-5	0.010957	0.089565	0.247067	1e-5	1e-5	1e-5	0.530515	1e-5	NA	NA	NA	NA	NA	QX1791	10
0.021041	1e-5	1e-5	0.110335	0.665419	1e-5	1e-5	0.203145	1e-5	1e-5	NA	NA	NA	NA	NA	QX1792	10
1e-5	0.1162	1e-5	1e-5	0.769981	1e-5	1e-5	0.113749	1e-5	1e-5	NA	NA	NA	NA	NA	QX1793	10
1e-5	0.014976	1e-5	1e-5	0.984944	1e-5	1e-5	1e-5	1e-5	1e-5	NA	NA	NA	NA	NA	QX1794	10
1e-5	1e-5	1e-5	0.99991	1e-5	1e-5	1e-5	1e-5	1e-5	1e-5	NA	NA	NA	NA	NA	RC301	10
1e-5	1e-5	0.147895	0.441724	1e-5	1e-5	1e-5	1e-5	0.133827	0.276495	NA	NA	NA	NA	NA	WN2001	10
0.291728	1e-5	0.033591	0.500382	1e-5	1e-5	1e-5	1e-5	0.038234	0.136015	NA	NA	NA	NA	NA	WN2002	10
1e-5	1e-5	1e-5	0.945856	0.054064	1e-5	1e-5	1e-5	1e-5	1e-5	NA	NA	NA	NA	NA	WN2033	10
0.388506	1e-5	0.585344	1e-5	1e-5	1.3e-5	1e-5	1e-5	0.026078	1e-5	NA	NA	NA	NA	NA	WN2050	10
1e-5	1e-5	1e-5	1e-5	0.99991	1e-5	1e-5	1e-5	1e-5	1e-5	NA	NA	NA	NA	NA	XZ1513	10
1e-5	1e-5	1e-5	1e-5	1e-5	1e-5	0.99991	1e-5	1e-5	1e-5	NA	NA	NA	NA	NA	XZ1514	10
1e-5	1e-5	1e-5	0.003334	0.901499	1e-5	0.095098	1e-5	1e-5	1e-5	NA	NA	NA	NA	NA	XZ1515	10
1e-5	1e-5	1e-5	1e-5	1e-5	0.202629	0.627167	1e-5	0.170134	1e-5	NA	NA	NA	NA	NA	XZ1516	10
0.474989	1e-5	1e-5	0.524941	1e-5	1e-5	1e-5	1e-5	1e-5	NA	NA	NA	NA	NA	NA	AB1	9
1e-5	1e-5	1e-5	0.99992	1e-5	1e-5	1e-5	1e-5	1e-5	NA	NA	NA	NA	NA	NA	BRC20067	9
1e-5	1e-5	0.033486	0.383964	0.526111	1e-5	1e-5	1e-5	0.056389	NA	NA	NA	NA	NA	NA	BRC20263	9
0.99992	1e-5	1e-5	1e-5	1e-5	1e-5	1e-5	1e-5	1e-5	NA	NA	NA	NA	NA	NA	CB4851	9
0.251715	1e-5	1e-5	0.748215	1e-5	1e-5	1e-5	1e-5	1e-5	NA	NA	NA	NA	NA	NA	CB4852	9
1e-5	1e-5	1e-5	0.330093	1e-5	1e-5	1e-5	1e-5	0.669837	NA	NA	NA	NA	NA	NA	CB4853	9
1e-5	1e-5	1e-5	0.545036	0.454894	1e-5	1e-5	1e-5	1e-5	NA	NA	NA	NA	NA	NA	CB4854	9
1e-5	1e-5	1e-5	0.17754	1e-5	1e-5	1e-5	1e-5	0.82239	NA	NA	NA	NA	NA	NA	CB4855	9
1e-5	0.010991	0.902808	1e-5	0.020416	1e-5	0.065735	1e-5	1e-5	NA	NA	NA	NA	NA	NA	CB4856	9
1e-5	1e-5	1e-5	1e-5	1e-5	1e-5	1e-5	1e-5	0.99992	NA	NA	NA	NA	NA	NA	CB4857	9
1e-5	1e-5	1e-5	1e-5	1e-5	1e-5	1e-5	1e-5	0.99992	NA	NA	NA	NA	NA	NA	CB4858	9
0.609518	1e-5	1e-5	1e-5	1e-5	1e-5	0.390412	1e-5	1e-5	NA	NA	NA	NA	NA	NA	CB4932	9
1e-5	1e-5	1e-5	0.190636	0.185983	1e-5	1e-5	1e-5	0.623321	NA	NA	NA	NA	NA	NA	CX11254	9
1.3e-5	1e-5	1e-5	1e-5	1e-5	1e-5	1e-5	1e-5	0.999917	NA	NA	NA	NA	NA	NA	CX11262	9
1e-5	1e-5	1e-5	1e-5	1e-5	1e-5	1e-5	1e-5	0.99992	NA	NA	NA	NA	NA	NA	CX11264	9
1e-5	1e-5	1e-5	0.351582	0.385743	1e-5	1e-5	1e-5	0.262615	NA	NA	NA	NA	NA	NA	CX11271	9
0.027004	1e-5	1.4e-5	0.258373	0.167723	1e-5	1e-5	1e-5	0.546846	NA	NA	NA	NA	NA	NA	CX11276	9
1e-5	1e-5	1e-5	1e-5	0.334423	1e-5	1e-5	1e-5	0.665507	NA	NA	NA	NA	NA	NA	CX11285	9
1e-5	1e-5	1e-5	0.261555	1e-5	1e-5	1e-5	1e-5	0.738375	NA	NA	NA	NA	NA	NA	CX11292	9
1e-5	0.04043	1e-5	0.263801	0.035934	1e-5	0.067185	1e-5	0.59261	NA	NA	NA	NA	NA	NA	CX11307	9
1e-5	1e-5	1e-5	1e-5	1e-5	1e-5	1e-5	1e-5	0.99992	NA	NA	NA	NA	NA	NA	CX11314	9
1e-5	1e-5	1e-5	0.145873	1e-5	1e-5	1e-5	1e-5	0.854057	NA	NA	NA	NA	NA	NA	CX11315	9
1e-5	1e-5	1e-5	0.273253	1e-5	1e-5	0.726677	1e-5	1e-5	NA	NA	NA	NA	NA	NA	DL200	9
0.052404	1e-5	1e-5	0.121489	0.074181	1.5e-5	1e-5	1e-5	0.751871	NA	NA	NA	NA	NA	NA	DL226	9
1e-5	0.025184	0.845903	1e-5	1e-5	1e-5	0.128853	1e-5	1e-5	NA	NA	NA	NA	NA	NA	DL238	9
1e-5	1e-5	0.707138	1e-5	0.018917	1e-5	1e-5	1e-5	0.273885	NA	NA	NA	NA	NA	NA	ECA189	9
1.2e-5	1.3e-5	1e-5	1e-5	1e-5	0.999915	1e-5	1e-5	1e-5	NA	NA	NA	NA	NA	NA	ECA191	9
0.999917	1e-5	1e-5	1e-5	1e-5	1e-5	1.3e-5	1e-5	1e-5	NA	NA	NA	NA	NA	NA	ECA252	9
1e-5	1e-5	1e-5	1e-5	1e-5	1e-5	1e-5	0.99992	1e-5	NA	NA	NA	NA	NA	NA	ECA347	9
1e-5	1e-5	1e-5	1e-5	1e-5	1e-5	1e-5	1e-5	0.99992	NA	NA	NA	NA	NA	NA	ECA348	9
1e-5	1e-5	1e-5	1e-5	1e-5	1e-5	1e-5	1e-5	0.99992	NA	NA	NA	NA	NA	NA	ECA349	9
1e-5	1.2e-5	1.8e-5	1e-5	1e-5	1e-5	1.8e-5	0.999902	1e-5	NA	NA	NA	NA	NA	NA	ECA36	9
1e-5	1e-5	1e-5	1e-5	1e-5	1e-5	1e-5	0.99992	1e-5	NA	NA	NA	NA	NA	NA	ECA363	9
1e-5	0.084862	0.604498	0.034452000000000003	1e-5	1e-5	0.084896	0.191252	1e-5	NA	NA	NA	NA	NA	NA	ECA369	9
1e-5	1e-5	0.66142	1e-5	0.056927	1e-5	1e-5	1e-5	0.281593	NA	NA	NA	NA	NA	NA	ECA372	9
1e-5	1e-5	1.1e-5	1e-5	1e-5	0.999919	1e-5	1e-5	1e-5	NA	NA	NA	NA	NA	NA	ECA396	9
0.020954	0.127255	0.058902	1e-5	1e-5	0.175088	1e-5	0.617761	1e-5	NA	NA	NA	NA	NA	NA	ECA701	9
1e-5	1e-5	0.867173	1e-5	1e-5	0.130054	0.002714	1e-5	1e-5	NA	NA	NA	NA	NA	NA	ECA703	9
1e-5	1e-5	0.853481	1e-5	1e-5	1e-5	1e-5	1e-5	0.146449	NA	NA	NA	NA	NA	NA	ECA705	9
1e-5	1e-5	0.960899	1e-5	1e-5	1e-5	0.039031	1e-5	1e-5	NA	NA	NA	NA	NA	NA	ECA706	9
1e-5	1e-5	0.836261	1e-5	1e-5	1e-5	1e-5	1e-5	0.163669	NA	NA	NA	NA	NA	NA	ECA710	9
1e-5	1e-5	0.99992	1e-5	1e-5	1e-5	1e-5	1e-5	1e-5	NA	NA	NA	NA	NA	NA	ECA712	9
1e-5	1e-5	1e-5	1e-5	1e-5	0.99992	1e-5	1e-5	1e-5	NA	NA	NA	NA	NA	NA	ECA722	9
1e-5	1.3e-5	1e-5	1e-5	1e-5	0.999917	1e-5	1e-5	1e-5	NA	NA	NA	NA	NA	NA	ECA723	9
1e-5	1e-5	1e-5	1e-5	1e-5	1e-5	1e-5	0.99992	1e-5	NA	NA	NA	NA	NA	NA	ECA724	9
1e-5	1e-5	1e-5	1e-5	1e-5	0.999919	1.1e-5	1e-5	1e-5	NA	NA	NA	NA	NA	NA	ECA730	9
1e-5	1e-5	0.99992	1e-5	1e-5	1e-5	1e-5	1e-5	1e-5	NA	NA	NA	NA	NA	NA	ECA732	9
1e-5	1e-5	0.99992	1e-5	1e-5	1e-5	1e-5	1e-5	1e-5	NA	NA	NA	NA	NA	NA	ECA733	9
1e-5	1e-5	0.616955	1e-5	1e-5	1e-5	1e-5	1e-5	0.382975	NA	NA	NA	NA	NA	NA	ECA738	9
1e-5	1e-5	1e-5	1e-5	1e-5	1e-5	1e-5	0.99992	1e-5	NA	NA	NA	NA	NA	NA	ECA740	9
1e-5	1e-5	1e-5	1.9e-5	1.7e-5	1e-5	1e-5	0.999904	1e-5	NA	NA	NA	NA	NA	NA	ECA741	9
1e-5	1e-5	1e-5	1e-5	1e-5	1e-5	1e-5	0.99992	1e-5	NA	NA	NA	NA	NA	NA	ECA742	9
0.045869	1e-5	0.839301	1e-5	1e-5	1e-5	1e-5	1e-5	0.11477	NA	NA	NA	NA	NA	NA	ECA743	9
1e-5	1e-5	1e-5	1e-5	1e-5	0.99992	1e-5	1e-5	1e-5	NA	NA	NA	NA	NA	NA	ECA744	9
1.1e-5	1e-5	1e-5	1e-5	1e-5	0.999919	1e-5	1e-5	1e-5	NA	NA	NA	NA	NA	NA	ECA745	9
1e-5	1e-5	1.3e-5	1e-5	1e-5	0.999917	1e-5	1e-5	1e-5	NA	NA	NA	NA	NA	NA	ECA746	9
1e-5	1e-5	0.99992	1e-5	1e-5	1e-5	1e-5	1e-5	1e-5	NA	NA	NA	NA	NA	NA	ECA760	9
1e-5	1e-5	0.99992	1e-5	1e-5	1e-5	1e-5	1e-5	1e-5	NA	NA	NA	NA	NA	NA	ECA768	9
1e-5	1e-5	0.99992	1e-5	1e-5	1e-5	1e-5	1e-5	1e-5	NA	NA	NA	NA	NA	NA	ECA777	9
1.8e-5	1e-5	0.999912	1e-5	1e-5	1e-5	1e-5	1e-5	1e-5	NA	NA	NA	NA	NA	NA	ECA778	9
1e-5	1e-5	0.955201	1e-5	1e-5	0.044729	1e-5	1e-5	1e-5	NA	NA	NA	NA	NA	NA	ECA807	9
1e-5	1e-5	0.99992	1e-5	1e-5	1e-5	1e-5	1e-5	1e-5	NA	NA	NA	NA	NA	NA	ECA812	9
1e-5	1e-5	1e-5	0.269623	1e-5	1e-5	1e-5	1e-5	0.730307	NA	NA	NA	NA	NA	NA	ED3005	9
1e-5	1e-5	1e-5	0.309563	0.12699	1e-5	1e-5	1e-5	0.563386	NA	NA	NA	NA	NA	NA	ED3011	9
0.745067	1e-5	1e-5	0.254863	1e-5	1e-5	1e-5	1e-5	1e-5	NA	NA	NA	NA	NA	NA	ED3012	9
0.048436	1e-5	1e-5	0.514981	1.3e-5	1e-5	0.43652	1e-5	1e-5	NA	NA	NA	NA	NA	NA	ED3017	9
1e-5	1e-5	1e-5	0.345536	0.654384	1.9e-5	1e-5	1e-5	1e-5	NA	NA	NA	NA	NA	NA	ED3040	9
1e-5	1e-5	1e-5	0.64783	0.205221	1e-5	0.14689	1e-5	1e-5	NA	NA	NA	NA	NA	NA	ED3046	9
1e-5	1e-5	1e-5	0.758689	0.241241	1e-5	1e-5	1e-5	1e-5	NA	NA	NA	NA	NA	NA	ED3048	9
1e-5	1e-5	1e-5	0.648488	0.210793	1e-5	0.140659	1e-5	1e-5	NA	NA	NA	NA	NA	NA	ED3049	9
1e-5	1e-5	1e-5	0.270457	0.729473	1e-5	1e-5	1e-5	1e-5	NA	NA	NA	NA	NA	NA	ED3052	9
1e-5	1e-5	1e-5	0.99992	1e-5	1e-5	1e-5	1e-5	1e-5	NA	NA	NA	NA	NA	NA	ED3073	9
1e-5	0.013025	1e-5	0.797785	0.161674	1e-5	0.027466	1e-5	1e-5	NA	NA	NA	NA	NA	NA	ED3077	9
0.292039	1e-5	1e-5	0.641508	1e-5	1e-5	1e-5	1e-5	0.066393	NA	NA	NA	NA	NA	NA	EG4347	9
1e-5	0.118203	1e-5	0.732916	1e-5	1e-5	0.148821	1e-5	1e-5	NA	NA	NA	NA	NA	NA	EG4349	9
0.021332	1e-5	1e-5	0.241282	0.624949	1e-5	0.112387	1e-5	1e-5	NA	NA	NA	NA	NA	NA	EG4724	9
1e-5	0.238602	1e-5	0.133811	0.627527	1e-5	1e-5	1e-5	1e-5	NA	NA	NA	NA	NA	NA	EG4725	9
0.065358	1e-5	1e-5	0.522148	1e-5	1e-5	1e-5	1e-5	0.412434	NA	NA	NA	NA	NA	NA	EG4946	9
1e-5	1e-5	1e-5	0.921889	0.078041	1e-5	1e-5	1e-5	1e-5	NA	NA	NA	NA	NA	NA	GXW1	9
0.185567	1e-5	1e-5	0.705834	0.006661	1e-5	0.101888	1e-5	1e-5	NA	NA	NA	NA	NA	NA	JT11398	9
1e-5	1e-5	1e-5	0.82211	0.17782	1e-5	1e-5	1e-5	1e-5	NA	NA	NA	NA	NA	NA	JU1088	9
1e-5	1e-5	1e-5	0.238857	1e-5	1e-5	1e-5	1e-5	0.761073	NA	NA	NA	NA	NA	NA	JU1172	9
0.712833	1e-5	1e-5	0.287097	1e-5	1e-5	1e-5	1e-5	1e-5	NA	NA	NA	NA	NA	NA	JU1200	9
0.73131	0.003877	1e-5	1e-5	1e-5	1e-5	0.264753	1e-5	1e-5	NA	NA	NA	NA	NA	NA	JU1212	9
1e-5	1e-5	1e-5	1e-5	1e-5	1e-5	0.99992	1e-5	1e-5	NA	NA	NA	NA	NA	NA	JU1213	9
1e-5	1e-5	1e-5	1e-5	1e-5	1e-5	0.99992	1e-5	1e-5	NA	NA	NA	NA	NA	NA	JU1242	9
0.248359	1e-5	1e-5	1e-5	1e-5	1e-5	0.751571	1e-5	1e-5	NA	NA	NA	NA	NA	NA	JU1246	9
0.99992	1e-5	1e-5	1e-5	1e-5	1e-5	1e-5	1e-5	1e-5	NA	NA	NA	NA	NA	NA	JU1249	9
0.294862	1e-5	1e-5	0.705068	1e-5	1e-5	1e-5	1e-5	1e-5	NA	NA	NA	NA	NA	NA	JU1395	9
1e-5	0.054215	1e-5	0.285528	0.292395	1e-5	0.367813	1e-5	1e-5	NA	NA	NA	NA	NA	NA	JU1400	9
1e-5	1e-5	1e-5	0.70081	0.186235	1e-5	0.112896	1e-5	1e-5	NA	NA	NA	NA	NA	NA	JU1409	9
0.014309	1e-5	1e-5	0.719344	0.100503	1e-5	0.165794	1e-5	1e-5	NA	NA	NA	NA	NA	NA	JU1440	9
1e-5	1e-5	1e-5	1e-5	0.656647	1e-5	0.343283	1e-5	1e-5	NA	NA	NA	NA	NA	NA	JU1491	9
1e-5	1e-5	1e-5	0.422481	1e-5	1e-5	0.577449	1e-5	1e-5	NA	NA	NA	NA	NA	NA	JU1530	9
0.675326	1e-5	1e-5	0.324604	1e-5	1e-5	1e-5	1e-5	1e-5	NA	NA	NA	NA	NA	NA	JU1543	9
0.99992	1e-5	1e-5	1e-5	1e-5	1e-5	1e-5	1e-5	1e-5	NA	NA	NA	NA	NA	NA	JU1568	9
1e-5	1e-5	1e-5	1e-5	1e-5	1e-5	0.99992	1e-5	1e-5	NA	NA	NA	NA	NA	NA	JU1580	9
0.13673	1e-5	1e-5	0.155141	1e-5	1e-5	0.708062	1.7e-5	1e-5	NA	NA	NA	NA	NA	NA	JU1581	9
0.876131	1e-5	1e-5	0.123799	1e-5	1e-5	1e-5	1e-5	1e-5	NA	NA	NA	NA	NA	NA	JU1586	9
0.351527	0.035567	1e-5	0.582229	0.030627	1e-5	1e-5	1e-5	1e-5	NA	NA	NA	NA	NA	NA	JU1652	9
0.034287	1e-5	1e-5	1e-5	1e-5	1e-5	0.965643	1e-5	1e-5	NA	NA	NA	NA	NA	NA	JU1666	9
0.69444	1e-5	1e-5	1e-5	1e-5	1e-5	0.30549	1e-5	1e-5	NA	NA	NA	NA	NA	NA	JU1792	9
1e-5	1e-5	1e-5	1e-5	1e-5	1e-5	0.99992	1e-5	1e-5	NA	NA	NA	NA	NA	NA	JU1793	9
0.28486	1e-5	1e-5	0.151268	1e-5	1e-5	0.276349	1e-5	0.287473	NA	NA	NA	NA	NA	NA	JU1808	9
0.697792	1e-5	1e-5	0.302138	1e-5	1e-5	1e-5	1e-5	1e-5	NA	NA	NA	NA	NA	NA	JU1896	9
0.098132	1e-5	1.4e-5	1e-5	1e-5	1e-5	0.901794	1e-5	1e-5	NA	NA	NA	NA	NA	NA	JU1934	9
0.042904	1e-5	0.174037	1e-5	0.254339	1e-5	0.52867	1e-5	1e-5	NA	NA	NA	NA	NA	NA	JU2001	9
1e-5	0.059133	1e-5	0.641103	0.126433	1e-5	0.173282	1e-5	1e-5	NA	NA	NA	NA	NA	NA	JU2007	9
1e-5	1e-5	1.2e-5	0.305543	1e-5	1e-5	1e-5	1e-5	0.694385	NA	NA	NA	NA	NA	NA	JU2016	9
0.071264	1e-5	0.11914	0.306076	0.130721	1e-5	1e-5	1e-5	0.372759	NA	NA	NA	NA	NA	NA	JU2017	9
0.146935	1e-5	1e-5	1e-5	1e-5	1e-5	0.852995	1e-5	1e-5	NA	NA	NA	NA	NA	NA	JU2106	9
0.033588	1e-5	1e-5	1.6e-5	0.140516	1e-5	0.82583	1e-5	1e-5	NA	NA	NA	NA	NA	NA	JU2131	9
0.229776	1e-5	1e-5	1e-5	1e-5	1e-5	0.770154	1e-5	1e-5	NA	NA	NA	NA	NA	NA	JU2141	9
0.566174	0.025115	1e-5	0.392874	0.015786	1e-5	1e-5	1e-5	1e-5	NA	NA	NA	NA	NA	NA	JU2234	9
1e-5	1.3e-5	1e-5	1e-5	1e-5	1e-5	0.999917	1e-5	1e-5	NA	NA	NA	NA	NA	NA	JU2250	9
0.99992	1e-5	1e-5	1e-5	1e-5	1e-5	1e-5	1e-5	1e-5	NA	NA	NA	NA	NA	NA	JU2257	9
1e-5	0.99992	1e-5	1e-5	1e-5	1e-5	1e-5	1e-5	1e-5	NA	NA	NA	NA	NA	NA	JU2316	9
1e-5	1e-5	1e-5	0.659477	0.210935	1e-5	0.129528	1e-5	1e-5	NA	NA	NA	NA	NA	NA	JU2464	9
1e-5	1e-5	1e-5	0.99992	1e-5	1e-5	1e-5	1e-5	1e-5	NA	NA	NA	NA	NA	NA	JU2466	9
1e-5	1e-5	1e-5	0.271132	1e-5	1e-5	0.37928	1e-5	0.349528	NA	NA	NA	NA	NA	NA	JU2478	9
0.099389	1e-5	1e-5	0.883515	0.017036	1e-5	1e-5	1e-5	1e-5	NA	NA	NA	NA	NA	NA	JU2513	9
1e-5	0.607107	1e-5	1e-5	0.392823	1e-5	1e-5	1e-5	1e-5	NA	NA	NA	NA	NA	NA	JU2519	9
1e-5	1e-5	1e-5	1e-5	0.99992	1e-5	1e-5	1e-5	1e-5	NA	NA	NA	NA	NA	NA	JU2522	9
1e-5	0.99992	1e-5	1e-5	1e-5	1e-5	1e-5	1e-5	1e-5	NA	NA	NA	NA	NA	NA	JU2526	9
1e-5	1e-5	1e-5	0.556836	1e-5	1e-5	0.443094	1e-5	1e-5	NA	NA	NA	NA	NA	NA	JU2534	9
0.99992	1e-5	1e-5	1e-5	1e-5	1e-5	1e-5	1e-5	1e-5	NA	NA	NA	NA	NA	NA	JU2565	9
0.794279	1e-5	1e-5	0.111725	1e-5	1.4e-5	0.093931	1e-5	1e-5	NA	NA	NA	NA	NA	NA	JU2566	9
1e-5	1e-5	1e-5	1e-5	1e-5	1e-5	0.99992	1e-5	1e-5	NA	NA	NA	NA	NA	NA	JU2570	9
0.711825	1e-5	1e-5	1e-5	1e-5	1.2e-5	0.288104	1e-5	1e-5	NA	NA	NA	NA	NA	NA	JU2572	9
0.864032	1e-5	1e-5	1e-5	1e-5	1e-5	0.135898	1e-5	1e-5	NA	NA	NA	NA	NA	NA	JU2575	9
0.028498	6.7e-5	0.063952	0.345387	1e-5	1e-5	0.562056	1e-5	1e-5	NA	NA	NA	NA	NA	NA	JU2576	9
1e-5	1e-5	1e-5	0.528149	0.471781	1e-5	1e-5	1e-5	1e-5	NA	NA	NA	NA	NA	NA	JU2578	9
0.08384	0.400332	1e-5	0.033104	0.370963	1e-5	0.111721	1e-5	1e-5	NA	NA	NA	NA	NA	NA	JU258	9
1e-5	1e-5	0.227543	0.537072	1e-5	1e-5	1e-5	1e-5	0.235324	NA	NA	NA	NA	NA	NA	JU2581	9
1.5e-5	0.0403	1e-5	0.170499	0.701135	1e-5	0.088012	1e-5	1e-5	NA	NA	NA	NA	NA	NA	JU2586	9
1e-5	0.031727	1e-5	0.674475	0.002892	1e-5	0.117326	1e-5	0.17354	NA	NA	NA	NA	NA	NA	JU2587	9
0.826731	0.027704	1e-5	1e-5	0.073483	1e-5	0.072032	1e-5	1e-5	NA	NA	NA	NA	NA	NA	JU2592	9
1e-5	1e-5	0.202269	0.737137	1e-5	1e-5	0.011474	1e-5	0.04907	NA	NA	NA	NA	NA	NA	JU2593	9
1e-5	1e-5	1e-5	1e-5	1e-5	1e-5	0.99992	1e-5	1e-5	NA	NA	NA	NA	NA	NA	JU2600	9
1e-5	1e-5	1e-5	1.5e-5	1e-5	1e-5	0.999915	1e-5	1e-5	NA	NA	NA	NA	NA	NA	JU2610	9
1e-5	1e-5	1e-5	0.705076	0.117855	1.8e-5	1e-5	1e-5	0.177	NA	NA	NA	NA	NA	NA	JU2619	9
0.476284	1e-5	1.6e-5	0.151111	1e-5	1e-5	0.372538	1e-5	1e-5	NA	NA	NA	NA	NA	NA	JU2800	9
1e-5	0.036662	0.119772	0.31959	0.523926	1e-5	1e-5	1e-5	1e-5	NA	NA	NA	NA	NA	NA	JU2811	9
0.99992	1e-5	1e-5	1e-5	1e-5	1e-5	1e-5	1e-5	1e-5	NA	NA	NA	NA	NA	NA	JU2825	9
1e-5	0.028855	0.157804	0.666147	1e-5	1e-5	1e-5	1e-5	0.147144	NA	NA	NA	NA	NA	NA	JU2829	9
1e-5	1e-5	0.239871	0.067896	0.538027	1e-5	0.032123	1e-5	0.122043	NA	NA	NA	NA	NA	NA	JU2838	9
1e-5	0.066421	1e-5	0.649336	1e-5	1e-5	0.284182	1e-5	1e-5	NA	NA	NA	NA	NA	NA	JU2841	9
0.259668	1e-5	1e-5	0.418608	0.321664	1e-5	1e-5	1e-5	1e-5	NA	NA	NA	NA	NA	NA	JU2853	9
0.003185	0.002323	1e-5	0.326342	0.119355	1e-5	0.145623	1e-5	0.403142	NA	NA	NA	NA	NA	NA	JU2862	9
1e-5	1e-5	1e-5	1e-5	1e-5	1e-5	1e-5	1e-5	0.99992	NA	NA	NA	NA	NA	NA	JU2866	9
1e-5	1e-5	1e-5	0.66492	0.140513	1e-5	1e-5	1e-5	0.194506	NA	NA	NA	NA	NA	NA	JU2878	9
1e-5	1.3e-5	0.328936	0.190921	1e-5	1e-5	1e-5	1e-5	0.48008	NA	NA	NA	NA	NA	NA	JU2879	9
0.238432	1e-5	1e-5	0.502677	1e-5	1e-5	0.258831	1e-5	1e-5	NA	NA	NA	NA	NA	NA	JU2906	9
0.53867	1e-5	1e-5	0.46126	1e-5	1e-5	1e-5	1e-5	1e-5	NA	NA	NA	NA	NA	NA	JU2907	9
1e-5	1e-5	1e-5	0.409053	1e-5	1e-5	0.590877	1e-5	1e-5	NA	NA	NA	NA	NA	NA	JU310	9
0.828613	1e-5	1e-5	0.056539	1e-5	1e-5	0.114788	1e-5	1e-5	NA	NA	NA	NA	NA	NA	JU311	9
0.167075	1e-5	1e-5	0.404514	0.428352	1e-5	1e-5	1e-5	1e-5	NA	NA	NA	NA	NA	NA	JU3125	9
0.180175	1e-5	1e-5	0.244529	0.575236	1e-5	1e-5	1e-5	1e-5	NA	NA	NA	NA	NA	NA	JU3127	9
0.019706	1e-5	1e-5	0.759835	1e-5	1e-5	0.220399	1e-5	1e-5	NA	NA	NA	NA	NA	NA	JU3128	9
1e-5	1e-5	1e-5	1e-5	1e-5	1e-5	0.99992	1e-5	1e-5	NA	NA	NA	NA	NA	NA	JU3132	9
0.012589	1e-5	1e-5	0.772017	0.088164	1e-5	0.12718	1e-5	1e-5	NA	NA	NA	NA	NA	NA	JU3134	9
1e-5	1e-5	1e-5	0.99992	1e-5	1e-5	1e-5	1e-5	1e-5	NA	NA	NA	NA	NA	NA	JU3135	9
0.158822	1e-5	0.006919	0.092219	0.460959	1e-5	0.28104	1e-5	1e-5	NA	NA	NA	NA	NA	NA	JU3137	9
1e-5	1e-5	1.2e-5	1e-5	1e-5	1e-5	0.999918	1e-5	1e-5	NA	NA	NA	NA	NA	NA	JU3140	9
1e-5	1e-5	1e-5	0.591651	0.198461	1e-5	0.209828	1e-5	1e-5	NA	NA	NA	NA	NA	NA	JU3144	9
1e-5	1e-5	1e-5	0.379121	0.187829	1e-5	0.43299	1e-5	1e-5	NA	NA	NA	NA	NA	NA	JU323	9
1e-5	1e-5	1e-5	0.503406	1e-5	1e-5	0.496524	1e-5	1e-5	NA	NA	NA	NA	NA	NA	JU346	9
1e-5	0.028228	1e-5	0.750549	1e-5	1e-5	0.133667	1e-5	0.087506	NA	NA	NA	NA	NA	NA	JU360	9
0.94553	1e-5	1e-5	0.05439	1e-5	1e-5	2e-5	1e-5	1e-5	NA	NA	NA	NA	NA	NA	JU367	9
0.152474	1e-5	1.4e-5	5.24e-4	1.3e-5	1e-5	0.846935	1e-5	1e-5	NA	NA	NA	NA	NA	NA	JU393	9
0.999918	1e-5	1e-5	1.1e-5	1e-5	1.1e-5	1e-5	1e-5	1e-5	NA	NA	NA	NA	NA	NA	JU394	9
0.212483	1e-5	1e-5	1.5e-5	1e-5	1e-5	0.787443	1e-5	1e-5	NA	NA	NA	NA	NA	NA	JU397	9
0.99992	1e-5	1e-5	1e-5	1e-5	1e-5	1e-5	1e-5	1e-5	NA	NA	NA	NA	NA	NA	JU406	9
0.682965	1e-5	1e-5	0.180288	1e-5	1e-5	0.136686	1.1e-5	1e-5	NA	NA	NA	NA	NA	NA	JU440	9
0.217847	1e-5	1e-5	0.758616	1.8e-5	1e-5	0.02347	1e-5	1e-5	NA	NA	NA	NA	NA	NA	JU561	9
1e-5	1e-5	1e-5	0.543503	0.198473	1.2e-5	0.257963	1e-5	1e-5	NA	NA	NA	NA	NA	NA	JU642	9
1e-5	0.026392	0.046705000000000003	0.674359	1e-5	1e-5	0.101113	1e-5	0.151392	NA	NA	NA	NA	NA	NA	JU751	9
1e-5	1e-5	0.054091	0.33604	0.609808	1e-5	1e-5	1e-5	1e-5	NA	NA	NA	NA	NA	NA	JU774	9
1e-5	0.887532	1e-5	1e-5	0.112398	1e-5	1e-5	1e-5	1e-5	NA	NA	NA	NA	NA	NA	JU775	9
1e-5	1e-5	1e-5	1e-5	0.99992	1e-5	1e-5	1e-5	1e-5	NA	NA	NA	NA	NA	NA	JU778	9
0.018688	0.372191	1e-5	1.8e-5	0.603116	1e-5	0.005947	1e-5	1e-5	NA	NA	NA	NA	NA	NA	JU782	9
1e-5	1.7e-5	1e-5	1e-5	1e-5	1e-5	0.999913	1e-5	1e-5	NA	NA	NA	NA	NA	NA	JU792	9
1e-5	1e-5	1e-5	0.841485	0.030032	1e-5	0.027949	1e-5	0.100484	NA	NA	NA	NA	NA	NA	JU830	9
0.182177	1e-5	1e-5	0.268272	1e-5	1e-5	0.549491	1e-5	1e-5	NA	NA	NA	NA	NA	NA	JU847	9
1e-5	1.3e-5	1e-5	0.595486	0.118493	1e-5	0.041599	1e-5	0.244369	NA	NA	NA	NA	NA	NA	KR314	9
1e-5	1e-5	1e-5	1e-5	0.99992	1e-5	1e-5	1e-5	1e-5	NA	NA	NA	NA	NA	NA	LKC34	9
0.99992	1e-5	1e-5	1e-5	1e-5	1e-5	1e-5	1e-5	1e-5	NA	NA	NA	NA	NA	NA	LSJ1	9
1e-5	1e-5	1e-5	0.469361	0.530569	1e-5	1e-5	1e-5	1e-5	NA	NA	NA	NA	NA	NA	MY1	9
1.2e-5	0.24661	1e-5	0.636299	0.106283	1e-5	0.010756	1e-5	1e-5	NA	NA	NA	NA	NA	NA	MY10	9
0.285948	1e-5	0.562109	1e-5	1e-5	1e-5	0.01756	1e-5	0.134333	NA	NA	NA	NA	NA	NA	MY16	9
0.178305	0.067705	1e-5	0.16301	1e-5	1e-5	0.155038	1e-5	0.435902	NA	NA	NA	NA	NA	NA	MY18	9
0.51466	1.3e-5	1e-5	0.079701	1e-5	1e-5	0.405575	1e-5	1e-5	NA	NA	NA	NA	NA	NA	MY2147	9
0.044367	1e-5	1e-5	0.825794	1e-5	1e-5	0.129779	1e-5	1e-5	NA	NA	NA	NA	NA	NA	MY2212	9
1e-5	1e-5	0.857296	1e-5	1e-5	1.6e-5	1e-5	1e-5	0.142628	NA	NA	NA	NA	NA	NA	MY23	9
0.552995	1e-5	1.6e-5	0.129987	0.099694	1e-5	0.217267	1e-5	1e-5	NA	NA	NA	NA	NA	NA	MY2453	9
1e-5	1e-5	1e-5	0.769325	0.056324	1e-5	0.17429	1e-5	1e-5	NA	NA	NA	NA	NA	NA	MY2530	9
1e-5	1e-5	1e-5	0.796981	0.14699	1e-5	0.055968	1e-5	1e-5	NA	NA	NA	NA	NA	NA	MY2535	9
0.34452700000000003	1e-5	1e-5	1e-5	1e-5	1e-5	0.655403	1e-5	1e-5	NA	NA	NA	NA	NA	NA	MY2573	9
1e-5	1e-5	1e-5	0.99992	1e-5	1e-5	1e-5	1e-5	1e-5	NA	NA	NA	NA	NA	NA	MY2585	9
1e-5	1e-5	1e-5	0.99992	1e-5	1e-5	1e-5	1e-5	1e-5	NA	NA	NA	NA	NA	NA	MY2693	9
1e-5	1e-5	1e-5	0.99992	1e-5	1e-5	1e-5	1e-5	1e-5	NA	NA	NA	NA	NA	NA	MY2713	9
0.13401	1e-5	1e-5	0.432745	1e-5	1e-5	0.058879	1e-5	0.374316	NA	NA	NA	NA	NA	NA	MY2741	9
1e-5	1e-5	1e-5	0.183121	0.06467	1e-5	1e-5	1e-5	0.752149	NA	NA	NA	NA	NA	NA	MY518	9
1e-5	1e-5	1e-5	0.839901	0.160029	1e-5	1e-5	1e-5	1e-5	NA	NA	NA	NA	NA	NA	MY679	9
0.03022	1e-5	1e-5	0.274973	1e-5	1e-5	0.694747	1e-5	1e-5	NA	NA	NA	NA	NA	NA	MY772	9
0.309127	1e-5	1e-5	1e-5	1e-5	1e-5	0.103244	1e-5	0.587569	NA	NA	NA	NA	NA	NA	MY795	9
0.039946	1e-5	1e-5	0.775556	1e-5	1e-5	0.184438	1e-5	1e-5	NA	NA	NA	NA	NA	NA	MY920	9
0.99992	1e-5	1e-5	1e-5	1e-5	1e-5	1e-5	1e-5	1e-5	NA	NA	NA	NA	NA	NA	N2	9
0.01469	1e-5	1e-5	0.543329	0.052821	1e-5	0.389111	1e-5	1e-5	NA	NA	NA	NA	NA	NA	NIC1	9
0.401628	1e-5	1e-5	1e-5	1e-5	1e-5	0.598302	1e-5	1e-5	NA	NA	NA	NA	NA	NA	NIC1049	9
0.805861	1e-5	1e-5	1e-5	1e-5	1e-5	0.194069	1e-5	1e-5	NA	NA	NA	NA	NA	NA	NIC1107	9
0.05142	1.2e-5	1e-5	0.358384	0.219715	1e-5	0.370428	1e-5	1e-5	NA	NA	NA	NA	NA	NA	NIC166	9
0.149794	0.356505	1.6e-5	0.043066	0.357538	1e-5	0.093051	1e-5	1e-5	NA	NA	NA	NA	NA	NA	NIC195	9
1e-5	0.52991	1e-5	1e-5	0.188103	1e-5	0.281928	1e-5	1e-5	NA	NA	NA	NA	NA	NA	NIC199	9
0.455477	1e-5	1e-5	0.544453	1e-5	1e-5	1e-5	1e-5	1e-5	NA	NA	NA	NA	NA	NA	NIC2	9
0.065304	1e-5	1e-5	0.658135	0.080659	1e-5	0.195853	1e-5	1e-5	NA	NA	NA	NA	NA	NA	NIC207	9
1e-5	1e-5	0.019199	0.74688	0.233861	1e-5	1e-5	1e-5	1e-5	NA	NA	NA	NA	NA	NA	NIC231	9
1e-5	1e-5	1e-5	1e-5	0.956819	1e-5	0.043111	1e-5	1e-5	NA	NA	NA	NA	NA	NA	NIC236	9
0.436777	1e-5	1e-5	0.045938	0.30587	1.3e-5	0.211361	1e-5	1e-5	NA	NA	NA	NA	NA	NA	NIC242	9
0.161061	0.838869	1e-5	1e-5	1e-5	1e-5	1e-5	1e-5	1e-5	NA	NA	NA	NA	NA	NA	NIC251	9
1e-5	1e-5	1e-5	1e-5	0.99992	1e-5	1e-5	1e-5	1e-5	NA	NA	NA	NA	NA	NA	NIC252	9
0.227645	1e-5	1e-5	0.670475	1e-5	1e-5	0.10182	1e-5	1e-5	NA	NA	NA	NA	NA	NA	NIC255	9
1e-5	0.300527	1e-5	1e-5	0.699395	1e-5	1.4e-5	1.3e-5	1e-5	NA	NA	NA	NA	NA	NA	NIC256	9
1e-5	0.881732	1e-5	1e-5	0.118198	1e-5	1e-5	1e-5	1e-5	NA	NA	NA	NA	NA	NA	NIC258	9
0.112232	0.080416	1e-5	1e-5	0.635708	1e-5	0.171594	1e-5	1e-5	NA	NA	NA	NA	NA	NA	NIC259	9
1e-5	0.49249	1e-5	1e-5	0.50744	1e-5	1e-5	1e-5	1e-5	NA	NA	NA	NA	NA	NA	NIC260	9
1e-5	0.619079	1e-5	1e-5	0.380851	1e-5	1e-5	1e-5	1e-5	NA	NA	NA	NA	NA	NA	NIC261	9
1e-5	0.474898	1e-5	1e-5	0.525032	1e-5	1e-5	1e-5	1e-5	NA	NA	NA	NA	NA	NA	NIC262	9
1e-5	0.99992	1e-5	1e-5	1e-5	1e-5	1e-5	1e-5	1e-5	NA	NA	NA	NA	NA	NA	NIC265	9
0.266372	0.069918	1e-5	1e-5	0.663649	1e-5	1e-5	1e-5	1e-5	NA	NA	NA	NA	NA	NA	NIC266	9
1e-5	1e-5	1e-5	0.26608	0.73385	1e-5	1e-5	1e-5	1e-5	NA	NA	NA	NA	NA	NA	NIC267	9
1e-5	1e-5	0.438425	0.059201	0.502314	1e-5	1e-5	1e-5	1e-5	NA	NA	NA	NA	NA	NA	NIC268	9
1e-5	1e-5	1e-5	1e-5	0.841504	1e-5	0.158426	1e-5	1e-5	NA	NA	NA	NA	NA	NA	NIC269	9
1e-5	0.327949	1e-5	1e-5	0.671971	1e-5	1.2e-5	1.8e-5	1e-5	NA	NA	NA	NA	NA	NA	NIC271	9
1e-5	1e-5	1e-5	1e-5	0.991743	1.6e-5	0.008181	1e-5	1e-5	NA	NA	NA	NA	NA	NA	NIC272	9
1e-5	1e-5	1e-5	1e-5	0.99992	1e-5	1e-5	1e-5	1e-5	NA	NA	NA	NA	NA	NA	NIC274	9
1e-5	1e-5	1e-5	0.197537	0.802393	1e-5	1e-5	1e-5	1e-5	NA	NA	NA	NA	NA	NA	NIC275	9
1e-5	1e-5	1e-5	1e-5	0.99992	1e-5	1e-5	1e-5	1e-5	NA	NA	NA	NA	NA	NA	NIC276	9
1e-5	1e-5	1e-5	0.411398	1e-5	1e-5	0.588532	1e-5	1e-5	NA	NA	NA	NA	NA	NA	NIC277	9
1e-5	1e-5	1e-5	0.401377	0.080209	1e-5	0.491281	1e-5	0.027083	NA	NA	NA	NA	NA	NA	NIC3	9
1e-5	1e-5	1e-5	1e-5	1e-5	1e-5	0.99992	1e-5	1e-5	NA	NA	NA	NA	NA	NA	NIC501	9
0.026446	1e-5	1e-5	0.656814	1e-5	1e-5	0.316681	1e-5	1e-5	NA	NA	NA	NA	NA	NA	NIC511	9
1e-5	1e-5	1e-5	1e-5	0.99992	1e-5	1e-5	1e-5	1e-5	NA	NA	NA	NA	NA	NA	NIC513	9
1e-5	1.8e-5	1e-5	1e-5	0.999912	1e-5	1e-5	1e-5	1e-5	NA	NA	NA	NA	NA	NA	NIC514	9
1e-5	0.026852	1e-5	0.365227	0.411487	1e-5	0.196384	1e-5	1e-5	NA	NA	NA	NA	NA	NA	NIC515	9
0.085955	1e-5	1e-5	0.415531	0.308235	1e-5	0.190229	1e-5	1e-5	NA	NA	NA	NA	NA	NA	NIC522	9
1e-5	1e-5	0.108113	0.466747	0.42508	1e-5	1e-5	1e-5	1e-5	NA	NA	NA	NA	NA	NA	NIC523	9
1e-5	0.076427	1e-5	0.495997	0.280229	1e-5	0.147298	1e-5	1e-5	NA	NA	NA	NA	NA	NA	NIC526	9
0.012753	0.018629	1e-5	0.219128	0.139324	1e-5	0.610125	1e-5	1e-5	NA	NA	NA	NA	NA	NA	NIC527	9
1e-5	1e-5	1e-5	0.848299	0.099375	1e-5	0.052266	1e-5	1e-5	NA	NA	NA	NA	NA	NA	NIC528	9
0.077692	1.8e-5	1e-5	0.696683	0.16323	1.7e-5	0.062329	1e-5	1e-5	NA	NA	NA	NA	NA	NA	NIC529	9
1e-5	1e-5	1e-5	0.873568	1e-5	1e-5	1e-5	1e-5	0.126362	NA	NA	NA	NA	NA	NA	PB303	9
1e-5	1e-5	1e-5	1e-5	1e-5	1e-5	1e-5	1e-5	0.99992	NA	NA	NA	NA	NA	NA	PB306	9
1e-5	1e-5	1.1e-5	1e-5	1e-5	1e-5	1e-5	1e-5	0.999919	NA	NA	NA	NA	NA	NA	PS2025	9
0.296421	1e-5	1e-5	0.703509	1e-5	1e-5	1e-5	1e-5	1e-5	NA	NA	NA	NA	NA	NA	PX179	9
0.027083	0.173681	0.00561	0.38701	0.054079	1e-5	1e-5	1e-5	0.352507	NA	NA	NA	NA	NA	NA	QG2075	9
1e-5	1e-5	1e-5	0.595336	0.315013	1e-5	1e-5	1e-5	0.089591	NA	NA	NA	NA	NA	NA	QG536	9
1e-5	1e-5	0.124143	1e-5	1e-5	1e-5	1e-5	1e-5	0.875787	NA	NA	NA	NA	NA	NA	QG556	9
1e-5	1e-5	1e-5	1e-5	1e-5	1e-5	1e-5	1e-5	0.99992	NA	NA	NA	NA	NA	NA	QG557	9
1e-5	0.151751	1e-5	0.544982	1e-5	1e-5	0.255798	0.047418	1e-5	NA	NA	NA	NA	NA	NA	QW947	9
1.6e-5	1e-5	1e-5	1e-5	1.6e-5	1e-5	1e-5	0.999908	1e-5	NA	NA	NA	NA	NA	NA	QX1211	9
1e-5	1e-5	1e-5	1e-5	1e-5	1e-5	1e-5	1e-5	0.99992	NA	NA	NA	NA	NA	NA	QX1212	9
1e-5	1e-5	1e-5	0.143489	1e-5	1e-5	1e-5	1e-5	0.856441	NA	NA	NA	NA	NA	NA	QX1233	9
0.116354	0.117737	0.543584	0.060997	1e-5	1e-5	0.046374	1e-5	0.114924	NA	NA	NA	NA	NA	NA	QX1791	9
1e-5	1e-5	0.608224	0.224302	0.167414	1e-5	1e-5	1e-5	1e-5	NA	NA	NA	NA	NA	NA	QX1792	9
1.4e-5	1e-5	0.820724	1e-5	0.143751	1e-5	1e-5	1e-5	0.03546	NA	NA	NA	NA	NA	NA	QX1793	9
1e-5	1e-5	0.777465	1e-5	1e-5	1e-5	1e-5	1e-5	0.222465	NA	NA	NA	NA	NA	NA	QX1794	9
1e-5	1e-5	1e-5	0.99992	1e-5	1e-5	1e-5	1e-5	1e-5	NA	NA	NA	NA	NA	NA	RC301	9
1e-5	0.400274	1e-5	0.39403	1e-5	1e-5	0.077303	1e-5	0.128342	NA	NA	NA	NA	NA	NA	WN2001	9
0.254063	0.140376	1e-5	0.585719	0.019792	1e-5	1e-5	1e-5	1e-5	NA	NA	NA	NA	NA	NA	WN2002	9
1e-5	1e-5	1e-5	0.625773	1e-5	1e-5	1e-5	1e-5	0.374157	NA	NA	NA	NA	NA	NA	WN2033	9
0.385216	1e-5	1e-5	1e-5	1e-5	1e-5	0.614714	1e-5	1e-5	NA	NA	NA	NA	NA	NA	WN2050	9
1e-5	1e-5	0.637889	1e-5	1e-5	1e-5	1e-5	0.046733	0.315317	NA	NA	NA	NA	NA	NA	XZ1513	9
1e-5	1e-5	1e-5	1e-5	1e-5	1e-5	1e-5	0.99992	1e-5	NA	NA	NA	NA	NA	NA	XZ1514	9
1e-5	1e-5	0.378502	1e-5	1e-5	1e-5	1e-5	0.152825	0.468613	NA	NA	NA	NA	NA	NA	XZ1515	9
1e-5	0.123524	1e-5	1e-5	1e-5	0.216183	1e-5	0.660233	1e-5	NA	NA	NA	NA	NA	NA	XZ1516	9
0.524534	1e-5	1e-5	1e-5	1e-5	1e-5	1e-5	0.475406	NA	NA	NA	NA	NA	NA	NA	AB1	8
0.99993	1e-5	1e-5	1e-5	1e-5	1e-5	1e-5	1e-5	NA	NA	NA	NA	NA	NA	NA	BRC20067	8
0.382066	1e-5	0.029744	0.059128	1e-5	1e-5	0.529022	1e-5	NA	NA	NA	NA	NA	NA	NA	BRC20263	8
1e-5	1e-5	1e-5	1e-5	1e-5	1e-5	1e-5	0.99993	NA	NA	NA	NA	NA	NA	NA	CB4851	8
0.748044	1e-5	1e-5	1e-5	1e-5	1e-5	1e-5	0.251896	NA	NA	NA	NA	NA	NA	NA	CB4852	8
0.330678	1e-5	1e-5	0.669262	1e-5	1e-5	1e-5	1e-5	NA	NA	NA	NA	NA	NA	NA	CB4853	8
0.546738	1e-5	1e-5	1e-5	1e-5	1e-5	0.453202	1e-5	NA	NA	NA	NA	NA	NA	NA	CB4854	8
0.176765	1e-5	1e-5	0.823175	1e-5	1e-5	1e-5	1e-5	NA	NA	NA	NA	NA	NA	NA	CB4855	8
1e-5	0.066637	0.898443	1e-5	0.011324	1e-5	0.023556	1e-5	NA	NA	NA	NA	NA	NA	NA	CB4856	8
1e-5	1e-5	1e-5	0.99993	1e-5	1e-5	1e-5	1e-5	NA	NA	NA	NA	NA	NA	NA	CB4857	8
1e-5	1e-5	1e-5	0.99993	1e-5	1e-5	1e-5	1e-5	NA	NA	NA	NA	NA	NA	NA	CB4858	8
1e-5	0.390628	1e-5	1e-5	1e-5	1e-5	1e-5	0.609312	NA	NA	NA	NA	NA	NA	NA	CB4932	8
0.191471	1e-5	1e-5	0.623121	1e-5	1e-5	0.185358	1e-5	NA	NA	NA	NA	NA	NA	NA	CX11254	8
1e-5	1e-5	1e-5	0.99993	1e-5	1e-5	1e-5	1e-5	NA	NA	NA	NA	NA	NA	NA	CX11262	8
1e-5	1e-5	1e-5	0.99993	1e-5	1e-5	1e-5	1e-5	NA	NA	NA	NA	NA	NA	NA	CX11264	8
0.352247	1e-5	1e-5	0.263098	1e-5	1e-5	0.384606	1e-5	NA	NA	NA	NA	NA	NA	NA	CX11271	8
0.263417	1e-5	1e-5	0.544252	1e-5	1e-5	0.165713	0.026578	NA	NA	NA	NA	NA	NA	NA	CX11276	8
1e-5	1e-5	1e-5	0.665649	1e-5	1e-5	0.334291	1e-5	NA	NA	NA	NA	NA	NA	NA	CX11285	8
0.26138	1e-5	1e-5	0.73856	1e-5	1e-5	1e-5	1e-5	NA	NA	NA	NA	NA	NA	NA	CX11292	8
0.263558	0.066991	1e-5	0.592672	0.039412	1e-5	0.037337	1e-5	NA	NA	NA	NA	NA	NA	NA	CX11307	8
1e-5	1e-5	1e-5	0.99993	1e-5	1e-5	1e-5	1e-5	NA	NA	NA	NA	NA	NA	NA	CX11314	8
0.146318	1e-5	1e-5	0.853622	1e-5	1e-5	1e-5	1e-5	NA	NA	NA	NA	NA	NA	NA	CX11315	8
0.272705	0.727235	1e-5	1e-5	1e-5	1e-5	1e-5	1e-5	NA	NA	NA	NA	NA	NA	NA	DL200	8
0.121314	1e-5	1e-5	0.752488	1e-5	1e-5	0.073885	0.052273	NA	NA	NA	NA	NA	NA	NA	DL226	8
1e-5	0.128667	0.841205	1e-5	0.030078	1e-5	1e-5	1e-5	NA	NA	NA	NA	NA	NA	NA	DL238	8
1e-5	1e-5	0.703428	0.274966	1e-5	1e-5	0.021556	1e-5	NA	NA	NA	NA	NA	NA	NA	ECA189	8
1e-5	1e-5	1e-5	1e-5	1e-5	0.99993	1e-5	1e-5	NA	NA	NA	NA	NA	NA	NA	ECA191	8
1e-5	1e-5	1e-5	1e-5	1e-5	1e-5	1e-5	0.99993	NA	NA	NA	NA	NA	NA	NA	ECA252	8
1e-5	1e-5	1e-5	1e-5	1e-5	0.99993	1e-5	1e-5	NA	NA	NA	NA	NA	NA	NA	ECA347	8
1e-5	1e-5	1e-5	0.99993	1e-5	1e-5	1e-5	1e-5	NA	NA	NA	NA	NA	NA	NA	ECA348	8
1e-5	1e-5	1e-5	0.99993	1e-5	1e-5	1e-5	1e-5	NA	NA	NA	NA	NA	NA	NA	ECA349	8
1e-5	1e-5	1e-5	1e-5	1e-5	0.99993	1e-5	1e-5	NA	NA	NA	NA	NA	NA	NA	ECA36	8
1e-5	1e-5	1e-5	1e-5	1e-5	0.99993	1e-5	1e-5	NA	NA	NA	NA	NA	NA	NA	ECA363	8
0.028786	0.079901	0.61117	1e-5	0.093449	0.186665	1e-5	1e-5	NA	NA	NA	NA	NA	NA	NA	ECA369	8
1e-5	1e-5	0.658711	0.282928	1e-5	1e-5	0.058311	1e-5	NA	NA	NA	NA	NA	NA	NA	ECA372	8
1e-5	1e-5	1e-5	1e-5	1e-5	0.99993	1e-5	1e-5	NA	NA	NA	NA	NA	NA	NA	ECA396	8
1e-5	1e-5	0.058722	1e-5	0.100386	0.840843	1e-5	1e-5	NA	NA	NA	NA	NA	NA	NA	ECA701	8
1e-5	1e-5	0.882671	1e-5	1e-5	0.117269	1e-5	1e-5	NA	NA	NA	NA	NA	NA	NA	ECA703	8
1e-5	1e-5	0.85201	0.14793	1e-5	1e-5	1e-5	1e-5	NA	NA	NA	NA	NA	NA	NA	ECA705	8
1e-5	0.043134	0.956806	1e-5	1e-5	1e-5	1e-5	1e-5	NA	NA	NA	NA	NA	NA	NA	ECA706	8
1e-5	1e-5	0.835537	0.164403	1e-5	1e-5	1e-5	1e-5	NA	NA	NA	NA	NA	NA	NA	ECA710	8
1e-5	1e-5	0.99993	1e-5	1e-5	1e-5	1e-5	1e-5	NA	NA	NA	NA	NA	NA	NA	ECA712	8
1e-5	1e-5	1e-5	1e-5	1e-5	0.99993	1e-5	1e-5	NA	NA	NA	NA	NA	NA	NA	ECA722	8
1.1e-5	1e-5	1.2e-5	1.4e-5	1e-5	0.999923	1e-5	1e-5	NA	NA	NA	NA	NA	NA	NA	ECA723	8
1e-5	1e-5	1e-5	0.076818	1e-5	0.923122	1e-5	1e-5	NA	NA	NA	NA	NA	NA	NA	ECA724	8
1e-5	1e-5	1e-5	1e-5	1e-5	0.99993	1e-5	1e-5	NA	NA	NA	NA	NA	NA	NA	ECA730	8
1e-5	1e-5	0.99993	1e-5	1e-5	1e-5	1e-5	1e-5	NA	NA	NA	NA	NA	NA	NA	ECA732	8
1e-5	1e-5	0.99993	1e-5	1e-5	1e-5	1e-5	1e-5	NA	NA	NA	NA	NA	NA	NA	ECA733	8
1e-5	1e-5	0.616648	0.383292	1e-5	1e-5	1e-5	1e-5	NA	NA	NA	NA	NA	NA	NA	ECA738	8
1e-5	1e-5	1e-5	1e-5	1e-5	0.99993	1e-5	1e-5	NA	NA	NA	NA	NA	NA	NA	ECA740	8
1e-5	1e-5	1e-5	1e-5	1e-5	0.99993	1e-5	1e-5	NA	NA	NA	NA	NA	NA	NA	ECA741	8
1e-5	1e-5	1e-5	1e-5	1e-5	0.99993	1e-5	1e-5	NA	NA	NA	NA	NA	NA	NA	ECA742	8
1e-5	1e-5	0.836587	0.116414	1e-5	1e-5	1e-5	0.046949	NA	NA	NA	NA	NA	NA	NA	ECA743	8
1e-5	1e-5	1e-5	1e-5	1e-5	0.99993	1e-5	1e-5	NA	NA	NA	NA	NA	NA	NA	ECA744	8
1e-5	1e-5	1e-5	1e-5	1e-5	0.99993	1e-5	1e-5	NA	NA	NA	NA	NA	NA	NA	ECA745	8
1e-5	1e-5	1e-5	1e-5	1e-5	0.99993	1e-5	1e-5	NA	NA	NA	NA	NA	NA	NA	ECA746	8
1e-5	1e-5	0.99993	1e-5	1e-5	1e-5	1e-5	1e-5	NA	NA	NA	NA	NA	NA	NA	ECA760	8
1e-5	1e-5	0.99993	1e-5	1e-5	1e-5	1e-5	1e-5	NA	NA	NA	NA	NA	NA	NA	ECA768	8
1e-5	1e-5	0.99993	1e-5	1e-5	1e-5	1e-5	1e-5	NA	NA	NA	NA	NA	NA	NA	ECA777	8
1e-5	1e-5	0.99993	1e-5	1e-5	1e-5	1e-5	1e-5	NA	NA	NA	NA	NA	NA	NA	ECA778	8
1e-5	1e-5	0.99993	1e-5	1e-5	1e-5	1e-5	1e-5	NA	NA	NA	NA	NA	NA	NA	ECA807	8
1e-5	1e-5	0.99993	1e-5	1e-5	1e-5	1e-5	1e-5	NA	NA	NA	NA	NA	NA	NA	ECA812	8
0.269623	1e-5	1e-5	0.730317	1e-5	1e-5	1e-5	1e-5	NA	NA	NA	NA	NA	NA	NA	ED3005	8
0.309742	1e-5	1e-5	0.563699	1.7e-5	1e-5	0.126502	1e-5	NA	NA	NA	NA	NA	NA	NA	ED3011	8
0.254643	1e-5	1e-5	1e-5	1e-5	1e-5	1e-5	0.745297	NA	NA	NA	NA	NA	NA	NA	ED3012	8
0.514374	0.436929	1e-5	1e-5	1e-5	1e-5	1e-5	0.048647	NA	NA	NA	NA	NA	NA	NA	ED3017	8
0.347364	1e-5	1e-5	1e-5	1e-5	1e-5	0.652576	1e-5	NA	NA	NA	NA	NA	NA	NA	ED3040	8
[truncated: 485 more rows]
