# Supplementary material for: Deep sampling of Hawaiian Caenorhabditis elegans reveals high genetic diversity and admixture with global populations
Source: eLife journal article supplement (doi:10.7554/elife.50465), 2019-12-03
Supplement: supp [file elife-50465-supp-v1.zip › elife_poa_e50465_Figure_5_figure_supplement_2_source_data_1.csv]

isotype	admix_cluster_k11	max_fraction_admix_cluster_k11	strain	reference_strain	long	lat	state	country
QX1791	A	0.559108	QX1791	1	-156.3935	20.6344	Hawaii	United States
ECA706	A	0.856741	ECA706	1	-155.438922	20.038831	Hawaii	United States
DL238	A	0.999898	DL238	1	-155.81	19.11	Hawaii	United States
CB4856	A	0.9999	CB4856	1	-157.86	21.33	Hawaii	United States
ECA369	A	0.9999	ECA369	1	-157.006389	21.175556	Hawaii	United States
ECA703	A	0.9999	ECA703	1	-155.438922	20.038831	Hawaii	United States
ECA732	A	0.9999	ECA732	1	-155.81845	19.115403	Hawaii	United States
ECA733	A	0.9999	ECA731	0	-155.818386	19.115886	Hawaii	United States
ECA733	A	0.9999	ECA733	1	-155.818386	19.115886	Hawaii	United States
NIC242	B	0.438872	NIC242	1	-9.31609	38.691765	Lisbon Metropolitan Area	Portugal
JU2800	B	0.467065	JU2800	1	2.331	48.79	Île-de-France	France
JU2800	B	0.467065	JU2802	0	2.14167	48.9067	Île-de-France	France
MY2147	B	0.490751	MY2143	0	10.117737	54.346355	Schleswig-Holstein	Germany
MY2147	B	0.490751	MY2147	1	10.117737	54.346355	Schleswig-Holstein	Germany
MY2453	B	0.509916	MY561	0	7.536628	51.950777	North Rhine-Westphalia	Germany
MY2453	B	0.509916	MY564	0	7.536628	51.950777	North Rhine-Westphalia	Germany
MY2453	B	0.509916	MY570	0	7.536628	51.950777	North Rhine-Westphalia	Germany
MY2453	B	0.509916	MY713	0	7.536628	51.950777	North Rhine-Westphalia	Germany
MY2453	B	0.509916	MY792	0	7.536628	51.950777	North Rhine-Westphalia	Germany
MY2453	B	0.509916	MY819	0	7.536628	51.950777	North Rhine-Westphalia	Germany
MY2453	B	0.509916	MY864	0	7.599099	51.950723000000004	North Rhine-Westphalia	Germany
MY2453	B	0.509916	MY524	0	7.536628	51.950777	North Rhine-Westphalia	Germany
MY2453	B	0.509916	MY965	0	7.536628	51.950777	North Rhine-Westphalia	Germany
MY2453	B	0.509916	MY2004	0	7.536628	51.950777	North Rhine-Westphalia	Germany
MY2453	B	0.509916	MY2011	0	7.536628	51.950777	North Rhine-Westphalia	Germany
MY2453	B	0.509916	MY2014	0	7.536628	51.950777	North Rhine-Westphalia	Germany
MY2453	B	0.509916	MY2050	0	7.536628	51.950777	North Rhine-Westphalia	Germany
MY2453	B	0.509916	MY2051	0	7.536628	51.950777	North Rhine-Westphalia	Germany
MY2453	B	0.509916	MY2054	0	7.536628	51.950777	North Rhine-Westphalia	Germany
MY2453	B	0.509916	MY2121	0	7.536628	51.950777	North Rhine-Westphalia	Germany
MY2453	B	0.509916	MY2137	0	7.536628	51.950777	North Rhine-Westphalia	Germany
MY2453	B	0.509916	MY2199	0	7.536628	51.950777	North Rhine-Westphalia	Germany
MY2453	B	0.509916	MY2288	0	7.536628	51.950777	North Rhine-Westphalia	Germany
MY2453	B	0.509916	MY2339	0	7.536628	51.950777	North Rhine-Westphalia	Germany
MY2453	B	0.509916	MY2453	1	7.536628	51.950777	North Rhine-Westphalia	Germany
MY2453	B	0.509916	MY2502	0	7.536628	51.950777	North Rhine-Westphalia	Germany
MY2453	B	0.509916	MY2541	0	7.536628	51.950777	North Rhine-Westphalia	Germany
MY2453	B	0.509916	MY2579	0	7.536628	51.950777	North Rhine-Westphalia	Germany
MY2453	B	0.509916	JU3136	0	2.1725	48.7015	Île-de-France	France
JU2907	B	0.520035	JU2908	0	11.2839	43.8063	Tuscany	Italy
JU2907	B	0.520035	JU2907	1	11.2906	43.8021	Tuscany	Italy
JU2234	B	0.551605	JU2234	1	-1.583	47.227	Pays de la Loire	France
CB4932	B	0.604814	CB4932	1	-3.1	51.02	England	United Kingdom
JU440	B	0.648635	JU440	1	1.56	48.715	Centre	France
JU1543	B	0.65206	JU1543	1	2.1725	48.7015	Île-de-France	France
JU1896	B	0.654548	JU1896	1	23.749673	37.999722	Attica	Greece
JU1200	B	0.682998	JU1200	1	-4.6	55.577	Scotland	United Kingdom
JU1200	B	0.682998	JU2860	0	0.115365	52.19842	England	United Kingdom
JU1792	B	0.689435	JU1792	1	1.064289	46.63278	Centre-Val de Loire	France
JU2572	B	0.709448	JU2572	1	2.395372	48.81257	Île-de-France	France
ED3012	B	0.72135	ED3012	1	-3.19	55.92	Scotland	United Kingdom
JU1212	B	0.725328	JU1212	1	-3.81	48.71	Bretagne	France
JU2566	B	0.770245	JU2566	1	2.44599	48.83886	Île-de-France	France
JU311	B	0.782558	JU312	0	4.4	44.42	Auvergne Rhône-Alpes	France
JU311	B	0.782558	JU315	0	4.4	44.2	Languedoc-Roussillon	France
JU311	B	0.782558	JU319	0	4.4	44.42	Auvergne Rhône-Alpes	France
JU311	B	0.782558	JU311	1	4.4	44.42	Rhône-Alpes	France
JU311	B	0.782558	MY2481	0	10.117737	54.346355	Schleswig-Holstein	Germany
NIC1107	B	0.794023	NIC1107	1	7.266935	43.716278	Provence-Alpes-Côte d'Azur	France
JU2592	B	0.816724	JU2592	1	-2.403836	48.628558	Brittany	France
JU2575	B	0.83492	JU2575	1	3.0707	49.0857	Île-de-France	France
JU1586	B	0.861778	JU1586	1	1.06	46.63	Centre	France
JU367	B	0.945253	JU361	0	2.23	48.98	Île-de-France	France
JU367	B	0.945253	JU367	1	2.23	48.98	Île-de-France	France
CB4851	B	0.9999	ECA243	1	0.48	44.85	Aquitaine	France
ECA252	B	0.9999	ECA339	0	0.4948	44.8358	Nouvelle-Aquitaine	France
ECA252	B	0.9999	ECA252	1	-118.1	34.1	California	United States
JU1249	B	0.9999	JU1249	1	1.951	49.126	Île-de-France	France
JU1568	B	0.9999	JU1568	1	2.3862	48.8092	Île-de-France	France
JU2257	B	0.9999	JU2287	0	1.1	46.6	Centre-Val de Loire	France
JU2257	B	0.9999	JU2257	1	1.1	46.6	Centre-Val de Loire	France
JU2565	B	0.9999	JU2565	1	1.066213	44.958394	Nouvelle-Aquitaine	France
JU2825	B	0.9999	JU2825	1	2.3862	48.8092	Île-de-France	France
JU394	B	0.9999	JU400	0	-0.32	49.28	Lower Normandy	France
JU394	B	0.9999	JU394	1	-0.32	49.28	Basse-Normandie	France
JU406	B	0.9999	JU406	1	-0.32	49.28	Basse-Normandie	France
LSJ1	B	0.9999	LSJ1	1	-2.59	51.45	England	United Kingdom
N2	B	0.9999	ECA253	0	-2.59	51.45	England	United Kingdom
N2	B	0.9999	ECA254	0	-2.59	51.45	England	United Kingdom
N2	B	0.9999	N2	1	-2.59	51.45	England	United Kingdom
ED3011	C	0.335005	ED3011	1	-3.19	55.92	Scotland	United Kingdom
JU2017	C	0.40346	JU2017	1	-122.463177	37.757593	California	United States
JU2862	C	0.426445	JU2862	1	0.1264	52.1944	England	United Kingdom
CX11276	C	0.591298	CX11276	1	-118.21198	34.20111	California	United States
CX11307	C	0.59957	CX11307	1	-118.10987	34.12946	California	United States
CX11254	C	0.656296	CX11254	1	-118.114835	34.130138	California	United States
CX11285	C	0.662305	CX11285	1	-118.05496	34.14331	California	United States
JU2016	C	0.686517	JU2016	1	-122.463177	37.757593	California	United States
CB4853	C	0.692965	ECA245	0	-118.131	34.171	California	United States
CB4853	C	0.692965	ECA246	1	-118.131	34.189	California	United States
DL226	C	0.722598	DL226	1	-123.2821	44.5633	Oregon	United States
CX11292	C	0.727048	CX11292	1	-118.30582	34.13531	California	United States
JU1172	C	0.765549	JU1172	1	-73.04	-36.87	Región del Bío Bío	Chile
QX1212	C	0.806142	QX1213	0	-122.4331	37.7502	California	United States
QX1212	C	0.806142	QX1214	0	-122.4331	37.7502	California	United States
QX1212	C	0.806142	QX1212	1	-122.4331	37.7502	California	United States
CB4855	C	0.815787	ECA248	1	-122.14	37.44	California	United States
QX1233	C	0.855445	QX1233	1	-122.2838	37.8804	California	United States
CX11315	C	0.855784	CX11315	1	-118.10987	34.12946	California	United States
QG556	C	0.860267	QG558	0	-119.702021	34.421629	California	United States
QG556	C	0.860267	QG556	1	-119.702021	34.421629	California	United States
CB4857	C	0.999899	ECA249	0	-117.719	34.096	California	United States
CB4857	C	0.999899	ECA250	1	-117.719	34.096	California	United States
CB4858	C	0.9999	ECA251	1	-118.1	34.1	California	United States
CB4858	C	0.9999	AB2	0	138.59	-34.93	South Australia	Australia
CB4858	C	0.9999	AB3	0	138.59	-34.93	South Australia	Australia
CB4858	C	0.9999	AB4	0	138.59	-34.93	South Australia	Australia
CB4858	C	0.9999	JU1960	0	-118.131319	34.18973	California	United States
CX11262	C	0.9999	CX11262	1	-118.114835	34.130138	California	United States
CX11264	C	0.9999	CX11264	1	-118.114835	34.130138	California	United States
CX11314	C	0.9999	CX11314	1	-118.10987	34.12946	California	United States
ECA348	C	0.9999	ECA348	1	-122.253889	37.775334	California	United States
ECA349	C	0.9999	ECA350	0	-117.235442	32.765353	California	United States
ECA349	C	0.9999	ECA349	1	-117.236741	32.765758	California	United States
JU2866	C	0.9999	JU2866	1	-118.4409	34.0751	California	United States
PB306	C	0.9999	ECA259	1	NA	NA
PS2025	C	0.9999	PS2025	1	-118.13	34.19	California	United States
QG557	C	0.9999	QG557	1	-119.702021	34.421629	California	United States
JU2853	D	0.379173	JU2853	1	-7.545	41.19	Vila Real District	Portugal
NIC522	D	0.420282	NIC522	1	-6.304441	36.535679	Andalusia	Spain
JU2811	D	0.454041	JU2811	1	151.219453	-33.8632	New South Wales	Australia
NIC523	D	0.463138	NIC523	1	-6.29831	36.535679	Andalusia	Spain
BRC20263	D	0.493992	BRC20263	1	151.2069889	-33.86748611	New South Wales	Australia
JU2007	D	0.502314	JU2007	1	-1.32413	50.7608	England	United Kingdom
JU642	D	0.505091	JU642	1	2.5	48.84	Île-de-France	France
JU346	D	0.507458	JU345	0	4.4	44.42	Rhone-Alpes	France
JU346	D	0.507458	JU346	1	4.4	44.42	Languedoc-Roussillon	France
QW947	D	0.519928	QW947	1	-70.6106	-33.4213	Santiago Metropolitan Region	Chile
JU2906	D	0.520081	JU2906	1	11.2806	43.8023	Tuscany	Italy
QG536	D	0.522272	QG537	0	-122.4415	37.7679	California	United States
QG536	D	0.522272	QG538	0	-122.4415	37.7679	California	United States
QG536	D	0.522272	QG536	1	-122.4415	37.7679	California	United States
CB4854	D	0.533478	CB4854	1	-118.131	34.189	California	United States
NIC1	D	0.537592	NIC1	1	5.3543	43.279	Provence-Alpes-Côte d'Azur	France
ED3017	D	0.540785	ED3017	1	-3.19	55.92	Scotland	United Kingdom
AB1	D	0.542764	AB1	1	138.59	-34.93	South Australia	Australia
JU2534	D	0.553552	JU2534	1	0.097087	49.357921	Normandy	France
EG4946	D	0.569549	EG4946	1	-111.82184	40.72596	Utah	United States
NIC2	D	0.574788	NIC2	1	5.3543	43.279	Provence-Alpes-Côte d'Azur	France
JU1652	D	0.582993	JU1652	1	-56.19	-34.86	Departamento de Montevideo	Uruguay
JU2841	D	0.605505	JU2841	1	176	-40		New Zealand
WN2002	D	0.611919	WN2002	1	5.694834	51.975285	Gelderland	Netherlands
JU2878	D	0.617716	JU2878	1	-99.098769	19.29732	Mexico City	Mexico
MY10	D	0.624069	MY10	1	7.53	51.96	Nordrhein-Westfalen	Germany
JU2464	D	0.626128	JU2467	0	-72.525	-13.155	Cusco	Peru
JU2464	D	0.626128	JU2468	0	-72.525	-13.155	Cusco	Peru
JU2464	D	0.626128	JU2464	1	-72.525	-13.155	Cusco	Peru
KR314	D	0.6276	KR314	1	-123.13	49.28	British Columbia	Canada
JU1409	D	0.644812	JU1401	0	-5.6331	37.4721	Andalusia	Spain
JU1409	D	0.644812	JU1409	1	-5.637	37.468	Andalucía	Spain
NIC511	D	0.664857	NIC511	1	14.2623855	40.8625	Campania	Italy
NIC207	D	0.670979	NIC207	1	7.24045	43.720505	Provence-Alpes-Côte d'Azur	France
JU2619	D	0.674056	JU2619	1	-117.275428	32.998352	California	United States
EG4347	D	0.675313	EG4347	1	-123.07108	44.04789	Oregon	United States
NIC255	D	0.679449	NIC255	1	7.266779	43.714834	Provence-Alpes-Côte d'Azur	France
ED3048	D	0.679556	ED3048	1	19.316667	-33.366667	Western Cape	South Africa
ED3048	D	0.679556	ED3042	0	19.316667	-33.366667	Western Cape	South Africa
NIC529	D	0.685008	NIC529	1	-4.784967	37.870754	Andalusia	Spain
JU1440	D	0.687095	JU1440	1	2.15231	41.41307	Catalunya	Spain
JU1440	D	0.687095	JU3133	0	2.1725	48.7015	Île-de-France	France
JT11398	D	0.690335	JT11398	1	-122.275484	47.763944	Washington	United States
MY2212	D	0.730147	MY2212	1	10.117737	54.346355	Schleswig-Holstein	Germany
PX179	D	0.730226	PX179	1	-123.058	44.035	Oregon	United States
JU1395	D	0.746648	JU1395	1	0.04619	47.2199	Pays de la Loire	France
ED3077	D	0.75534	ED3077	1	36.8	-1.316667	Nairobi County	Kenya
MY2535	D	0.756458	MY881	0	7.599099	51.950723000000004	North Rhine-Westphalia	Germany
MY2535	D	0.756458	MY2344	0	7.599099	51.950723000000004	North Rhine-Westphalia	Germany
MY2535	D	0.756458	MY2532	0	10.117737	54.346355	Schleswig-Holstein	Germany
MY2535	D	0.756458	MY2535	1	7.599099	51.950723000000004	North Rhine-Westphalia	Germany
MY2535	D	0.756458	NIC508	0	14.261756	40.86183	Campania	Italy
MY2535	D	0.756458	NIC512	0	14.2623855	40.8625	Campania	Italy
JU3128	D	0.758862	JU3128	1	15.2763	37.076	Sicily	Italy
NIC231	D	0.760836	NIC232	0	7.24045	43.720505	Provence-Alpes-Côte d'Azur	France
NIC231	D	0.760836	NIC231	1	7.24045	43.720505	Provence-Alpes-Côte d'Azur	France
NIC528	D	0.762944	NIC528	1	-6.29831	36.535679	Andalusia	Spain
JU3134	D	0.76489	JU3134	1	2.1725	48.7015	Île-de-France	France
MY2530	D	0.780637	MY2530	1	10.117737	54.346355	Schleswig-Holstein	Germany
JU1088	D	0.78102	JU1088	1	138.0149	34.7613	Shizuoka-ken	Japan
JU561	D	0.785725	JU561	1	-3.81	48.71	Bretagne	France
CB4852	D	0.792139	CB4852	1	NA	NA
MY920	D	0.804639	MY589	0	10.117737	54.346355	Schleswig-Holstein	Germany
MY920	D	0.804639	MY741	0	10.117737	54.346355	Schleswig-Holstein	Germany
MY920	D	0.804639	MY887	0	10.117737	54.346355	Schleswig-Holstein	Germany
MY920	D	0.804639	MY920	1	10.117737	54.346355	Schleswig-Holstein	Germany
MY920	D	0.804639	MY990	0	10.117737	54.346355	Schleswig-Holstein	Germany
MY920	D	0.804639	MY2042	0	10.117737	54.346355	Schleswig-Holstein	Germany
MY920	D	0.804639	MY2138	0	10.117737	54.346355	Schleswig-Holstein	Germany
MY920	D	0.804639	MY2347	0	10.117737	54.346355	Schleswig-Holstein	Germany
MY920	D	0.804639	MY2373	0	10.117737	54.346355	Schleswig-Holstein	Germany
MY920	D	0.804639	MY2406	0	10.117737	54.346355	Schleswig-Holstein	Germany
MY920	D	0.804639	MY2688	0	10.11505	54.3491	Schleswig-Holstein	Germany
MY679	D	0.809122	MY679	1	10.117737	54.346355	Schleswig-Holstein	Germany
MY679	D	0.809122	MY991	0	10.117737	54.346355	Schleswig-Holstein	Germany
JU2513	D	0.865712	JU2513	1	22.0736	38.26016	Peloponnisos Dytiki Ellada ke Ionio	Greece
PB303	D	0.87241	PB303	1	NA	NA
GXW1	D	0.909434	GXW1	1	114.419828	30.542889	Hubei Sheng	China
ED3073	D	0.934359	ED3057	0	36.65	-1.083333	Kiambu County	Kenya
ED3073	D	0.934359	ED3072	0	36.65	-1.083333	Kiambu County	Kenya
ED3073	D	0.934359	ED3073	1	36.65	-1.083333	Kiambu County	Kenya
MY2693	D	0.960228	MY2693	1	10.11505	54.3491	Schleswig-Holstein	Germany
MY2693	D	0.960228	MY2685	0	10.11505	54.3491	Schleswig-Holstein	Germany
MY2693	D	0.960228	MY2719	0	10.11505	54.3491	Schleswig-Holstein	Germany
JU3135	D	0.999892	JU3135	1	2.1725	48.7015	Île-de-France	France
MY2585	D	0.999897	MY2585	1	10.117737	54.346355	Schleswig-Holstein	Germany
MY2585	D	0.999897	MY2623	0	10.11505	54.3491	Schleswig-Holstein	Germany
BRC20067	D	0.999899	BRC20067	1	121.169736	24.072954	Taiwan	Taiwan
BRC20067	D	0.999899	BRC20113	0	121.283056	24.124167	Taiwan	Taiwan
MY2713	D	0.999899	MY803	0	10.117737	54.346355	Schleswig-Holstein	Germany
MY2713	D	0.999899	MY2689	0	10.11505	54.3491	Schleswig-Holstein	Germany
MY2713	D	0.999899	MY2635	0	10.11505	54.3491	Schleswig-Holstein	Germany
MY2713	D	0.999899	MY2713	1	10.11505	54.3491	Schleswig-Holstein	Germany
MY2713	D	0.999899	MY2679	0	10.11505	54.3491	Schleswig-Holstein	Germany
JU2466	D	0.9999	JU2466	1	-72.266	-13.257	Cusco	Peru
RC301	D	0.9999	RC301	1	7.84	47.99	Baden-Württemberg	Germany
RC301	D	0.9999	MY684	0	10.117737	54.346355	Schleswig-Holstein	Germany
RC301	D	0.9999	MY882	0	10.117737	54.346355	Schleswig-Holstein	Germany
RC301	D	0.9999	MY2022	0	10.117737	54.346355	Schleswig-Holstein	Germany
RC301	D	0.9999	MY2024	0	10.117737	54.346355	Schleswig-Holstein	Germany
RC301	D	0.9999	MY2078	0	10.117737	54.346355	Schleswig-Holstein	Germany
RC301	D	0.9999	MY2291	0	10.117737	54.346355	Schleswig-Holstein	Germany
RC301	D	0.9999	MY2691	0	10.11505	54.3491	Schleswig-Holstein	Germany
RC301	D	0.9999	MY2630	0	10.11505	54.3491	Schleswig-Holstein	Germany
RC301	D	0.9999	MY2684	0	10.11505	54.3491	Schleswig-Holstein	Germany
RC301	D	0.9999	MY2636	0	10.11505	54.3491	Schleswig-Holstein	Germany
RC301	D	0.9999	MY2640	0	10.11505	54.3491	Schleswig-Holstein	Germany
RC301	D	0.9999	MY2681	0	10.11505	54.3491	Schleswig-Holstein	Germany
RC301	D	0.9999	PX174	0	NA	NA
MY23	E	0.510437	MY2	0	7.53	51.96	North Rhine-Westphalia	Germany
MY23	E	0.510437	MY23	1	7.53	51.96	Nordrhein-Westfalen	Germany
MY23	E	0.510437	BRC20231	0	120.908112	23.541517	Taiwan Province	Taiwan
XZ1515	E	0.569182	XZ1515	1	-159.668	22.149	Hawaii	United States
QX1792	E	0.617955	QX1792	1	-156.35475	20.70554	Hawaii	United States
ECA738	E	0.720652	ECA734	0	-156.9740559	21.13927631	Hawaii	United States
ECA738	E	0.720652	ECA735	0	-156.9740559	21.13927631	Hawaii	United States
ECA738	E	0.720652	ECA736	0	-156.9740559	21.13927631	Hawaii	United States
ECA738	E	0.720652	ECA737	0	-156.9740559	21.13927631	Hawaii	United States
ECA738	E	0.720652	ECA738	1	-156.9740559	21.13927631	Hawaii	United States
ECA372	E	0.766152	ECA372	1	-159.664444	22.121667	Hawaii	United States
ECA189	E	0.842304	ECA190	0	-155.2225	19.423889	Hawaii	United States
ECA189	E	0.842304	ECA192	0	-155.221944	19.424444	Hawaii	United States
ECA189	E	0.842304	ECA193	0	-155.221944	19.424444	Hawaii	United States
ECA189	E	0.842304	ECA189	1	-155.2225	19.423889	Hawaii	United States
ECA189	E	0.842304	ECA393	0	-155.235493	19.449831	Hawaii	Unites States
ECA189	E	0.842304	ECA395	0	-155.235493	19.449831	Hawaii	Unites States
ECA189	E	0.842304	ECA394	0	-155.235493	19.449831	Hawaii	Unites States
XZ1513	E	0.843273	XZ1513	1	-159.63105	22.14787	Hawaii	United States
ECA743	E	0.84473	ECA743	1	-156.32317	20.741871	Hawaii	United States
QX1794	E	0.855294	QX1794	1	-156.35678	20.70559	Hawaii	United States
QX1793	E	0.875683	QX1793	1	-156.35678	20.70559	Hawaii	United States
ECA710	E	0.928485	ECA710	1	-155.438103	20.039656	Hawaii	United States
ECA777	E	0.999896	ECA777	1	-155.441503	20.039908	Hawaii	United States
ECA778	E	0.999896	ECA707	0	-155.441517	20.039783	Hawaii	United States
ECA778	E	0.999896	ECA708	0	-155.441517	20.039783	Hawaii	United States
ECA778	E	0.999896	ECA709	0	-155.441517	20.039783	Hawaii	United States
ECA778	E	0.999896	ECA721	0	-155.441419	20.039858	Hawaii	United States
ECA778	E	0.999896	ECA756	0	-155.441533	20.039822	Hawaii	United States
ECA778	E	0.999896	ECA757	0	-155.441533	20.039822	Hawaii	United States
ECA778	E	0.999896	ECA763	0	-155.441608	20.039878	Hawaii	United States
ECA778	E	0.999896	ECA764	0	-155.441608	20.039878	Hawaii	United States
ECA778	E	0.999896	ECA765	0	-155.441608	20.039878	Hawaii	United States
ECA778	E	0.999896	ECA766	0	-155.441608	20.039878	Hawaii	United States
ECA778	E	0.999896	ECA767	0	-155.441608	20.039878	Hawaii	United States
ECA778	E	0.999896	ECA781	0	-155.441608	20.039858	Hawaii	United States
ECA778	E	0.999896	ECA810	0	-155.441531	20.039897	Hawaii	United States
ECA778	E	0.999896	ECA811	0	-155.441531	20.039897	Hawaii	United States
ECA778	E	0.999896	ECA778	1	-155.441503	20.039908	Hawaii	United States
ECA768	E	0.999899	ECA772	0	-155.441503	20.039908	Hawaii	United States
ECA768	E	0.999899	ECA768	1	-155.441556	20.039914	Hawaii	United States
ECA812	E	0.999899	ECA704	0	-155.441517	20.039783	Hawaii	United States
ECA812	E	0.999899	ECA719	0	-155.441419	20.039858	Hawaii	United States
ECA812	E	0.999899	ECA748	0	-155.441492	20.039847	Hawaii	United States
ECA812	E	0.999899	ECA750	0	-155.441492	20.039847	Hawaii	United States
ECA812	E	0.999899	ECA751	0	-155.441492	20.039847	Hawaii	United States
ECA812	E	0.999899	ECA755	0	-155.441464	20.039869	Hawaii	United States
ECA812	E	0.999899	ECA759	0	-155.441531	20.039886	Hawaii	United States
ECA812	E	0.999899	ECA761	0	-155.441492	20.039847	Hawaii	United States
ECA812	E	0.999899	ECA762	0	-155.441533	20.039822	Hawaii	United States
ECA812	E	0.999899	ECA771	0	-155.441644	20.039864	Hawaii	United States
ECA812	E	0.999899	ECA773	0	-155.441644	20.039864	Hawaii	United States
ECA812	E	0.999899	ECA774	0	-155.441531	20.039869	Hawaii	United States
ECA812	E	0.999899	ECA775	0	-155.441531	20.039869	Hawaii	United States
ECA812	E	0.999899	ECA776	0	-155.441531	20.039869	Hawaii	United States
ECA812	E	0.999899	ECA782	0	-155.441608	20.039875	Hawaii	United States
ECA812	E	0.999899	ECA783	0	-155.441481	20.039783	Hawaii	United States
ECA812	E	0.999899	ECA786	0	-155.441608	20.039875	Hawaii	United States
ECA812	E	0.999899	ECA787	0	-155.441481	20.039783	Hawaii	United States
ECA812	E	0.999899	ECA809	0	-155.441481	20.039783	Hawaii	United States
ECA812	E	0.999899	ECA813	0	-155.441542	20.039917	Hawaii	United States
ECA812	E	0.999899	ECA812	1	-155.441542	20.039917	Hawaii	United States
ECA705	E	0.9999	ECA822	0	-155.438922	20.038831	Hawaii	United States
ECA705	E	0.9999	ECA705	1	-155.438922	20.038831	Hawaii	United States
ECA712	E	0.9999	ECA711	0	-155.222478	19.423864	Hawaii	United States
ECA712	E	0.9999	ECA713	0	-155.222478	19.423864	Hawaii	United States
ECA712	E	0.9999	ECA714	0	-155.222478	19.423864	Hawaii	United States
ECA712	E	0.9999	ECA715	0	-155.222478	19.423864	Hawaii	United States
ECA712	E	0.9999	ECA712	1	-155.222478	19.423864	Hawaii	United States
ECA760	E	0.9999	ECA739	0	-155.441619	20.039869	Hawaii	United States
ECA760	E	0.9999	ECA749	0	-155.441608	20.039875	Hawaii	United States
ECA760	E	0.9999	ECA752	0	-155.441492	20.039847	Hawaii	United States
ECA760	E	0.9999	ECA753	0	-155.441492	20.039847	Hawaii	United States
ECA760	E	0.9999	ECA754	0	-155.441464	20.039869	Hawaii	United States
ECA760	E	0.9999	ECA758	0	-155.441531	20.039886	Hawaii	United States
ECA760	E	0.9999	ECA769	0	-155.441619	20.039869	Hawaii	United States
ECA760	E	0.9999	ECA779	0	-155.441608	20.039858	Hawaii	United States
ECA760	E	0.9999	ECA780	0	-155.441608	20.039858	Hawaii	United States
ECA760	E	0.9999	ECA784	0	-155.441481	20.039783	Hawaii	United States
ECA760	E	0.9999	ECA785	0	-155.441481	20.039783	Hawaii	United States
ECA760	E	0.9999	ECA808	0	-155.441608	20.039858	Hawaii	United States
ECA760	E	0.9999	ECA760	1	-155.441619	20.039869	Hawaii	United States
ECA807	E	0.9999	ECA716	0	-155.441408	20.039844	Hawaii	United States
ECA807	E	0.9999	ECA717	0	-155.441408	20.039844	Hawaii	United States
ECA807	E	0.9999	ECA718	0	-155.441408	20.039844	Hawaii	United States
ECA807	E	0.9999	ECA720	0	-155.441419	20.039858	Hawaii	United States
ECA807	E	0.9999	ECA770	0	-155.441531	20.039869	Hawaii	United States
ECA807	E	0.9999	ECA807	1	-155.441531	20.039869	Hawaii	United States
ECA701	F	0.58748	ECA702	0	-159.656428	22.123283	Hawaii	United States
ECA701	F	0.58748	ECA701	1	-159.656428	22.123283	Hawaii	United States
XZ1516	F	0.624136	XZ1516	1	-159.668	22.149	Hawaii	United States
ECA724	F	0.991476	ECA725	0	-155.303825	19.439144	Hawaii	United States
ECA724	F	0.991476	ECA726	0	-155.303825	19.439144	Hawaii	United States
ECA724	F	0.991476	ECA727	0	-155.303825	19.439144	Hawaii	United States
ECA724	F	0.991476	ECA724	1	-155.303825	19.439144	Hawaii	United States
ECA742	F	0.999881	ECA742	1	-156.2781	20.80569	Hawaii	United States
ECA36	F	0.999888	ECA36	1	174.745529	-36.893333	Auckland	New Zealand
XZ1514	F	0.999894	XZ1514	1	-159.668	22.149	Hawaii	United States
ECA740	F	0.999895	ECA740	1	-156.339189	20.670022	Hawaii	United States
ECA741	F	0.999898	ECA741	1	-156.338322	20.6762	Hawaii	United States
ECA347	F	0.9999	ECA347	1	-155.303611	19.438889	Hawaii	United States
ECA363	F	0.9999	ECA363	1	-156.304444	20.723611	Hawaii	United States
QX1211	F	0.9999	QX1215	0	-122.4331	37.7502	California	United States
QX1211	F	0.9999	QX1216	0	-122.4331	37.7502	California	United States
QX1211	F	0.9999	QX1211	1	-122.4331	37.7502	California	United States
JU258	G	0.351847	JU258	1	-16.89	32.73	Madeira	Portugal
NIC199	G	0.467578	NIC199	1	-25.19929	37.745428	Azores	Portugal
NIC199	G	0.467578	NIC200	0	-25.66489	37.74942	Azores	Portugal
NIC256	G	0.641916	NIC263	0	-9.14875	38.71829	Lisbon Metropolitan Area	Portugal
NIC256	G	0.641916	NIC256	1	-9.14875	38.71829	Lisbon Metropolitan Area	Portugal
JU782	G	0.66968	JU782	1	-9.1503	38.7191	Lisbon	Portugal
NIC271	G	0.691917	NIC271	1	-9.31592	38.69237	Lisbon Metropolitan Area	Portugal
NIC251	G	0.699168	NIC251	1	-28.151364	38.66621	Azores	Portugal
NIC260	G	0.701671	NIC260	1	-9.14875	38.71829	Lisbon Metropolitan Area	Portugal
JU2519	G	0.713829	JU2519	1	-9.1486	38.7175	Lisbon	Portugal
NIC262	G	0.871335	NIC262	1	-9.14875	38.71829	Lisbon Metropolitan Area	Portugal
NIC258	G	0.999897	NIC258	1	-9.14875	38.71829	Lisbon Metropolitan Area	Portugal
JU2316	G	0.999899	JU2316	1	-9.1486	38.7175	Lisbon	Portugal
JU2526	G	0.999899	JU2526	1	-9.1486	38.7175	Lisbon	Portugal
NIC265	G	0.999899	NIC265	1	-9.14875	38.71829	Lisbon Metropolitan Area	Portugal
JU775	G	0.9999	JU775	1	-9.1486	38.7175	Lisbon	Portugal
NIC261	G	0.9999	NIC261	1	-9.14875	38.71829	Lisbon Metropolitan Area	Portugal
ECA723	H	0.999884	ECA728	0	-155.221661	19.424272	Hawaii	United States
ECA723	H	0.999884	ECA729	0	-155.221661	19.424272	Hawaii	United States
ECA723	H	0.999884	ECA723	1	-155.221661	19.424272	Hawaii	United States
ECA745	H	0.999898	ECA747	0	-155.955839	19.700464	Hawaii	United States
ECA745	H	0.999898	ECA745	1	-155.955839	19.700464	Hawaii	United States
ECA191	H	0.9999	ECA191	1	-155.221944	19.424167	Hawaii	United States
ECA396	H	0.9999	ECA397	0	-155.235493	19.449831	Hawaii	Unites States
ECA396	H	0.9999	ECA398	0	-155.235493	19.449831	Hawaii	Unites States
ECA396	H	0.9999	ECA399	0	-155.235493	19.449831	Hawaii	Unites States
ECA396	H	0.9999	ECA396	1	-155.235493	19.449831	Hawaii	Unites States
ECA722	H	0.9999	ECA722	1	-155.222625	19.423975	Hawaii	United States
ECA730	H	0.9999	ECA730	1	-155.222483	19.423869	Hawaii	United States
ECA744	H	0.9999	ECA744	1	-155.949572	19.719231	Hawaii	United States
ECA746	H	0.9999	ECA746	1	-155.819336	19.115292	Hawaii	United States
NIC166	I	0.375155	NIC166	1	6.89775	46.72722	Vaud	Switzerland
JU2478	I	0.377106	JU2478	1	4.351	50.85	Brussels	Belgium
JU323	I	0.430619	JU322	0	4.4	44.42	Rhone-Alpes	France
JU323	I	0.430619	JU323	1	4.4	44.42	Rhone-Alpes	France
JU323	I	0.430619	JU3131	0	2.1725	48.7015	Île-de-France	France
NIC3	I	0.484239	NIC4	0	5.3215	43.3636	Provence-Alpes-Côte d'Azur	France
NIC3	I	0.484239	NIC3	1	5.3215	43.3636	Provence-Alpes-Côte d'Azur	France
JU2001	I	0.524188	JU2001	1	55.5	-21.1	Saint-Benoît	Reunion
JU2576	I	0.554878	JU2576	1	3.072	49.0861	Île-de-France	France
JU847	I	0.566412	JU847	1	7.461	48.46	Alsace-Champagne-Ardenne-Lorraine	France
JU1530	I	0.582604	JU1530	1	2.1725	48.7015	Île-de-France	France
JU310	I	0.587041	JU263	0	1.06	46.63	Centre	France
JU310	I	0.587041	JU300	0	1.06	46.63	Centre	France
JU310	I	0.587041	JU310	1	1.06	46.63	Centre	France
NIC1049	I	0.593461	NIC1049	1	1.45032	43.593561	Occitanie	France
NIC277	I	0.604955	NIC277	1	7.266138	43.716441	Provence-Alpes-Côte d'Azur	France
WN2050	I	0.60703	WN2056	0	5.717	51.975	Gelderland	Netherlands
WN2050	I	0.60703	WN2050	1	5.717	51.975	Gelderland	Netherlands
NIC527	I	0.624523	NIC521	0	-6.304441	36.535679	Andalusia	Spain
NIC527	I	0.624523	NIC527	1	-6.304441	36.535679	Andalusia	Spain
JU1581	I	0.65758	ECA615	0	2.1725	48.7015	Île-de-France	France
JU1581	I	0.65758	JU1516	0	2.1725	48.7015	Île-de-France	France
JU1581	I	0.65758	JU1807	0	2.2131	48.662134	Île-de-France	France
JU1581	I	0.65758	JU1581	1	2.1725	48.7015	Île-de-France	France
MY2573	I	0.659791	MY559	0	7.599099	51.950723000000004	North Rhine-Westphalia	Germany
MY2573	I	0.659791	MY579	0	7.599099	51.950723000000004	North Rhine-Westphalia	Germany
MY2573	I	0.659791	MY710	0	7.599099	51.950723000000004	North Rhine-Westphalia	Germany
MY2573	I	0.659791	MY934	0	7.599099	51.950723000000004	North Rhine-Westphalia	Germany
MY2573	I	0.659791	MY2142	0	7.599099	51.950723000000004	North Rhine-Westphalia	Germany
MY2573	I	0.659791	MY2144	0	7.599099	51.950723000000004	North Rhine-Westphalia	Germany
MY2573	I	0.659791	MY2198	0	7.599099	51.950723000000004	North Rhine-Westphalia	Germany
MY2573	I	0.659791	MY2208	0	10.117737	54.346355	Schleswig-Holstein	Germany
MY2573	I	0.659791	MY2224	0	10.117737	54.346355	Schleswig-Holstein	Germany
MY2573	I	0.659791	MY2282	0	7.599099	51.950723000000004	North Rhine-Westphalia	Germany
MY2573	I	0.659791	MY2294	0	7.599099	51.950723000000004	North Rhine-Westphalia	Germany
MY2573	I	0.659791	MY2338	0	7.599099	51.950723000000004	North Rhine-Westphalia	Germany
MY2573	I	0.659791	MY2434	0	7.599099	51.950723000000004	North Rhine-Westphalia	Germany
MY2573	I	0.659791	MY2443	0	7.599099	51.950723000000004	North Rhine-Westphalia	Germany
MY2573	I	0.659791	MY2491	0	7.599099	51.950723000000004	North Rhine-Westphalia	Germany
MY2573	I	0.659791	MY2573	1	7.599099	51.950723000000004	North Rhine-Westphalia	Germany
MY772	I	0.707546	MY772	1	10.117737	54.346355	Schleswig-Holstein	Germany
DL200	I	0.736236	DL200	1	38.74	9.03	Oromia	Ethiopia
JU1246	I	0.749686	JU1246	1	1.96152	49.12618	Île-de-France	France
JU2141	I	0.780312	JU2141	1	1.0512	46.6293	Centre-Val de Loire	France
JU397	I	0.7884	JU397	1	-0.32	49.28	Basse-Normandie	France
JU2131	I	0.831556	JU2131	1	-4.705	48.0497	Brittany	France
JU393	I	0.840683	JU393	1	-0.32	49.28	Basse-Normandie	France
JU2106	I	0.845197	JU2106	1	0.239824	43.606266	Occitanie	France
JU1934	I	0.897654	JU1934	1	1.95114	49.12604	Île-de-France	France
JU1666	I	0.976914	JU1666	1	-3.972104	48.725018	Brittany	France
JU1666	I	0.976914	JU3139	0	-3.81	48.71	Brittany	France
JU2610	I	0.996153	JU2610	1	1.7915	49.1075	Île-de-France	France
JU2600	I	0.997591	JU1924	0	1.95114	49.12604	Île-de-France	France
JU2600	I	0.997591	JU2151	0	1.951	49.121	Île-de-France	France
JU2600	I	0.997591	JU3138	0	1.9595	49.1269	Île-de-France	France
JU2600	I	0.997591	JU2600	1	1.9496	49.1242	Île-de-France	France
JU3140	I	0.999887	JU3140	1	-3.81	48.71	Brittany	France
JU2570	I	0.999889	JU2570	1	-0.2685	46.2657	Nouvelle-Aquitaine	France
JU2250	I	0.999892	JU2250	1	-1.891389	48.285278	Brittany	France
JU792	I	0.999897	JU792	1	0.24	43.06	Midi-Pyrénées	France
JU792	I	0.999897	JU3142	0	-3.81	48.71	Brittany	France
JU792	I	0.999897	JU2460	0	-3.9251	48.6934	Bretagne	France
JU792	I	0.999897	JU2527	0	-3.5999	47.8797	Brittany	France
JU1213	I	0.9999	JU533	0	-3.81	48.71	Brittany	France
JU1213	I	0.9999	JU1213	1	-3.81	48.71	Bretagne	France
JU1213	I	0.9999	JU1656	0	-3.972104	48.725018	Brittany	France
JU1213	I	0.9999	JU1762	0	-3.790033	48.695548	Brittany	France
JU1213	I	0.9999	JU1770	0	-3.790033	48.695548	Brittany	France
JU1242	I	0.9999	JU1242	1	1.9595	49.1269	Île-de-France	France
JU1580	I	0.9999	JU1580	1	2.1725	48.7015	Île-de-France	France
JU1793	I	0.9999	JU1793	1	1.95114	49.12604	Île-de-France	France
JU1793	I	0.9999	JU1920	0	1.95114	49.12604	Île-de-France	France
JU1793	I	0.9999	JU1922	0	1.95114	49.12604	Île-de-France	France
JU1793	I	0.9999	JU1929	0	1.95114	49.12604	Île-de-France	France
JU1793	I	0.9999	JU2139	0	1.064289	46.63278	Centre-Val de Loire	France
JU1793	I	0.9999	JU2604	0	1.86175	49.16477	Île-de-France	France
JU1793	I	0.9999	JU2605	0	1.86	49.166	Île-de-France	France
JU3132	I	0.9999	JU3132	1	2.1725	48.7015	Île-de-France	France
NIC501	I	0.9999	NIC501	1	2.2675	48.77302	Île-de-France	France
NIC195	J	0.314001	NIC195	1	-28.37322	38.545874	Azores	Portugal
NIC195	J	0.314001	NIC196	0	-28.20149	38.4716405	Azores	Portugal
NIC195	J	0.314001	NIC197	0	-28.25165	38.39682	Azores	Portugal
NIC195	J	0.314001	NIC198	0	-31.23849	39.4364016	Azores	Portugal
NIC526	J	0.327151	NIC526	1	-6.304441	36.535679	Andalusia	Spain
JU1400	J	0.38002	JU1400	1	-5.988	37.3845	Andalucía	Spain
JU3137	J	0.41168	JU3137	1	2.1725	48.7015	Île-de-France	France
NIC515	J	0.417336	NIC515	1	-9.165884	38.776775	Lisbon	Portugal
CX11271	J	0.441877	CX11271	1	-118.12532	34.13712	California	United States
NIC268	J	0.452486	NIC268	1	-9.31592	38.69237	Lisbon Metropolitan Area	Portugal
JU3125	J	0.456677	JU3125	1	13.3722	38.1127	Sicily	Italy
ED3046	J	0.494246	ED3046	1	19.316667	-33.366667	Western Cape	South Africa
ED3049	J	0.502642	ED3049	1	19.316667	-33.366667	Western Cape	South Africa
NIC259	J	0.537535	NIC259	1	-9.14875	38.71829	Lisbon Metropolitan Area	Portugal
JU2578	J	0.542414	JU2578	1	2.4315	48.87613	Île-de-France	France
JU2838	J	0.547199	JU2838	1	-97.98832	20.205961	Puebla	Mexico
EG4725	J	0.593241	EG4725	1	-8.3476	41.6288	Braga	Portugal
JU3127	J	0.60954	JU3127	1	13.37274	38.11196	Sicily	Italy
MY1	J	0.632621	MY1	1	7.31	52.54	Niedersachsen	Germany
JU1491	J	0.635893	JU1491	1	1.06	46.63	Centre	France
EG4724	J	0.64855	EG4724	1	-8.3476	41.6288	Braga	Portugal
JU774	J	0.653356	JU774	1	-9.34	38.683	Lisbon	Portugal
JU2586	J	0.655669	JU2586	1	2.159	48.897	Île-de-France	France
NIC266	J	0.671094	NIC266	1	-9.31592	38.69237	Lisbon Metropolitan Area	Portugal
ED3040	J	0.721979	ED3040	1	28.016667	-26.166667	Gauteng	South Africa
ED3052	J	0.74927	ED3052	1	19.316667	-33.366667	Western Cape	South Africa
NIC267	J	0.785544	NIC270	0	-9.31592	38.69237	Lisbon Metropolitan Area	Portugal
NIC267	J	0.785544	NIC267	1	-9.31592	38.69237	Lisbon Metropolitan Area	Portugal
NIC275	J	0.830526	NIC275	1	-8.756356	39.769459	Leiria District	Portugal
NIC269	J	0.836765	NIC269	1	-9.31592	38.69237	Lisbon Metropolitan Area	Portugal
JU778	J	0.912188	JU778	1	-9.1491	38.719	Lisbon	Portugal
NIC252	J	0.931756	NIC252	1	-28.147949	38.661313	Azores	Portugal
NIC236	J	0.954727	NIC237	0	-9.313417	39.242006	Lisboa	Portugal
NIC236	J	0.954727	NIC236	1	-9.313417	39.242006	Lisboa	Portugal
NIC272	J	0.968573	NIC273	0	-8.756356	39.769459	Leiria District	Portugal
NIC272	J	0.968573	NIC272	1	-8.756356	39.769459	Leiria District	Portugal
NIC514	J	0.999892	NIC514	1	-9.167136	38.776038	Lisbon	Portugal
JU2522	J	0.9999	JU2522	1	-9.1486	38.7175	Lisbon	Portugal
LKC34	J	0.9999	LKC34	1	46	-18	Antananarivo Province	Madagascar
NIC274	J	0.9999	NIC274	1	-8.756356	39.769459	Leiria District	Portugal
NIC276	J	0.9999	NIC276	1	-8.756356	39.769459	Leiria District	Portugal
NIC513	J	0.9999	NIC513	1	-9.167136	38.776038	Lisbon	Portugal
JU3144	K	0.366712	JU3144	1	10.52	6.18	Northwest	Cameroon
QG2075	K	0.386104	QG2075	1	-83.376	33.951	Georgia	United States
JU2879	K	0.416813	JU2879	1	-99.098769	19.29732	Mexico City	Mexico
MY518	K	0.452711	MY518	1	7.611719	51.964154	North Rhine-Westphalia	Germany
WN2033	K	0.504377	WN2035	0	5.694	51.975	Gelderland	Netherlands
WN2033	K	0.504377	WN2039	0	5.694	51.975	Gelderland	Netherlands
WN2033	K	0.504377	WN2033	1	5.694	51.975	Gelderland	Netherlands
JU830	K	0.506807	JU830	1	9.05	48.52	Baden-Württemberg	Germany
JU360	K	0.549732	JU363	0	2.23	48.98	Île-de-France	France
JU360	K	0.549732	JU360	1	2.23	48.98	Île-de-France	France
EG4349	K	0.569544	EG4348	0	-111.87316	40.77167	Utah	United States
EG4349	K	0.569544	EG4349	1	-111.87316	40.771467	Utah	United States
MY2741	K	0.666187	MY2109	0	10.117737	54.346355	Schleswig-Holstein	Germany
MY2741	K	0.666187	MY2692	0	10.11505	54.3491	Schleswig-Holstein	Germany
MY2741	K	0.666187	MY2741	1	10.11505	54.3491	Schleswig-Holstein	Germany
WN2001	K	0.670023	WN2010	0	6.303406	51.954422	Gelderland	Netherlands
WN2001	K	0.670023	WN2011	0	6.303406	51.954422	Gelderland	Netherlands
WN2001	K	0.670023	WN2013	0	6.303406	51.954422	Gelderland	Netherlands
WN2001	K	0.670023	WN2014	0	6.303406	51.954422	Gelderland	Netherlands
WN2001	K	0.670023	WN2016	0	6.303406	51.954422	Gelderland	Netherlands
WN2001	K	0.670023	WN2017	0	6.303406	51.954422	Gelderland	Netherlands
WN2001	K	0.670023	WN2018	0	6.303406	51.954422	Gelderland	Netherlands
WN2001	K	0.670023	WN2019	0	6.303406	51.954422	Gelderland	Netherlands
WN2001	K	0.670023	WN2020	0	6.303406	51.954422	Gelderland	Netherlands
WN2001	K	0.670023	WN2021	0	6.303406	51.954422	Gelderland	Netherlands
WN2001	K	0.670023	WN2001	1	6.303406	51.954422	Gelderland	Netherlands
ED3005	K	0.677598	ED3005	1	-3.36	55.94	Scotland	United Kingdom
ED3005	K	0.677598	ED3021	0	-3.19	55.92	Scotland	United Kingdom
JU1808	K	0.685022	JU1808	1	2.395372	48.81257	Île-de-France	France
JU2587	K	0.791614	JU2587	1	3.872016	45.026713	Auvergne-Rhône-Alpes	France
MY16	K	0.879196	MY16	1	7.57	51.93	Nordrhein-Westfalen	Germany
MY795	K	0.97746	MY538	0	10.117737	54.346355	Schleswig-Holstein	Germany
MY795	K	0.97746	MY795	1	10.117737	54.346355	Schleswig-Holstein	Germany
MY795	K	0.97746	MY2099	0	10.117737	54.346355	Schleswig-Holstein	Germany
JU751	K	0.99253	JU751	1	2.5	48.84	Île-de-France	France
JU2581	K	0.9999	JU2581	1	1.1	46.6	Centre-Val de Loire	France
JU2593	K	0.9999	JU2593	1	2.222334	48.822556	Île-de-France	France
JU2829	K	0.9999	JU2828	0	1.064	46.632	Centre-Val de Loire	France
JU2829	K	0.9999	JU2830	0	1.064	46.632	Centre-Val de Loire	France
JU2829	K	0.9999	JU2829	1	1.064	46.632	Centre-Val de Loire	France
MY18	K	0.9999	MY6	0	7.53	51.96	North Rhine-Westphalia	Germany
MY18	K	0.9999	MY18	1	7.53	51.96	Nordrhein-Westfalen	Germany
