# Supplementary material for: Deep sampling of Hawaiian Caenorhabditis elegans reveals high genetic diversity and admixture with global populations
Source: eLife journal article supplement (doi:10.7554/elife.50465), 2019-12-03
Supplement: supp [file elife-50465-supp-v1.zip › elife_poa_e50465_Figure_5_figure_supplement_2_source_data_2.csv]

cluster	frac_cluster	max_frac	isotypes
A	0.240886	0.314001	NIC195
A	1e-5	0.327151	NIC526
A	1e-5	0.335005	ED3011
A	0.132455	0.351847	JU258
A	1e-5	0.366712	JU3144
A	1e-5	0.375155	NIC166
A	1e-5	0.377106	JU2478
A	1e-5	0.379173	JU2853
A	1e-5	0.38002	JU1400
A	0.043366	0.386104	QG2075
A	0.130618	0.40346	JU2017
A	1e-5	0.41168	JU3137
A	1e-5	0.416813	JU2879
A	1e-5	0.417336	NIC515
A	1e-5	0.420282	NIC522
A	1e-5	0.426445	JU2862
A	1e-5	0.430619	JU323
A	1e-5	0.438872	NIC242
A	1e-5	0.441877	CX11271
A	0.368281	0.452486	NIC268
A	1e-5	0.452711	MY518
A	0.192454	0.454041	JU2811
A	1e-5	0.456677	JU3125
A	1e-5	0.463138	NIC523
A	1e-5	0.467065	JU2800
A	0.133143	0.467578	NIC199
A	1e-5	0.484239	NIC3
A	1e-5	0.490751	MY2147
A	0.142338	0.493992	BRC20263
A	1e-5	0.494246	ED3046
A	0.018765	0.502314	JU2007
A	1e-5	0.502642	ED3049
A	1e-5	0.504377	WN2033
A	1e-5	0.505091	JU642
A	1e-5	0.506807	JU830
A	1e-5	0.507458	JU346
A	1e-5	0.509916	MY2453
A	1e-5	0.510437	MY23
A	1e-5	0.519928	QW947
A	1e-5	0.520035	JU2907
A	1e-5	0.520081	JU2906
A	1e-5	0.522272	QG536
A	0.199819	0.524188	JU2001
A	1e-5	0.533478	CB4854
A	1e-5	0.537535	NIC259
A	1e-5	0.537592	NIC1
A	1e-5	0.540785	ED3017
A	1e-5	0.542414	JU2578
A	1e-5	0.542764	AB1
A	0.072467	0.547199	JU2838
A	1e-5	0.549732	JU360
A	1.58e-4	0.551605	JU2234
A	1e-5	0.553552	JU2534
A	0.091793	0.554878	JU2576
A	0.559108	0.559108	QX1791
A	1e-5	0.566412	JU847
A	1e-5	0.569182	XZ1515
A	1e-5	0.569544	EG4349
A	1e-5	0.569549	EG4946
A	1e-5	0.574788	NIC2
A	1e-5	0.582604	JU1530
A	1e-5	0.582993	JU1652
A	1e-5	0.587041	JU310
A	0.250814	0.58748	ECA701
A	1e-5	0.591298	CX11276
A	1e-5	0.593241	EG4725
A	1e-5	0.593461	NIC1049
A	1e-5	0.59957	CX11307
A	1.9e-5	0.604814	CB4932
A	1e-5	0.604955	NIC277
A	0.091283	0.605505	JU2841
A	0.004214	0.60703	WN2050
A	1e-5	0.60954	JU3127
A	1e-5	0.611919	WN2002
A	1e-5	0.617716	JU2878
A	1e-5	0.617955	QX1792
A	1e-5	0.624069	MY10
A	0.174719	0.624136	XZ1516
A	1e-5	0.624523	NIC527
A	1e-5	0.626128	JU2464
A	1e-5	0.6276	KR314
A	1e-5	0.632621	MY1
A	1e-5	0.635893	JU1491
A	1e-5	0.641916	NIC256
A	1e-5	0.644812	JU1409
A	1e-5	0.64855	EG4724
A	1e-5	0.648635	JU440
A	1e-5	0.65206	JU1543
A	1e-5	0.653356	JU774
A	0.031787	0.654548	JU1896
A	1e-5	0.655669	JU2586
A	1e-5	0.656296	CX11254
A	0.067559	0.65758	JU1581
A	1e-5	0.659791	MY2573
A	1.1e-5	0.662305	CX11285
A	1e-5	0.664857	NIC511
A	1e-5	0.666187	MY2741
A	1e-5	0.66968	JU782
A	0.035989	0.670023	WN2001
A	1e-5	0.670979	NIC207
A	0.028665	0.671094	NIC266
A	1e-5	0.674056	JU2619
A	1e-5	0.675313	EG4347
A	1e-5	0.677598	ED3005
A	1e-5	0.679449	NIC255
A	1.4e-5	0.679556	ED3048
A	1e-5	0.682998	JU1200
A	1e-5	0.685008	NIC529
A	1e-5	0.685022	JU1808
A	1e-5	0.686517	JU2016
A	1e-5	0.687095	JU1440
A	1e-5	0.689435	JU1792
A	1e-5	0.690335	JT11398
A	1e-5	0.691917	NIC271
A	1e-5	0.692965	CB4853
A	0.253162	0.699168	NIC251
A	1e-5	0.701671	NIC260
A	1e-5	0.707546	MY772
A	1e-5	0.709448	JU2572
A	1e-5	0.713829	JU2519
A	1e-5	0.720652	ECA738
A	1e-5	0.72135	ED3012
A	1e-5	0.721979	ED3040
A	1e-5	0.722598	DL226
A	0.08567	0.725328	JU1212
A	1e-5	0.727048	CX11292
A	1e-5	0.730147	MY2212
A	1e-5	0.730226	PX179
A	1e-5	0.736236	DL200
A	1e-5	0.746648	JU1395
A	1e-5	0.74927	ED3052
A	1e-5	0.749686	JU1246
A	1e-5	0.75534	ED3077
A	1e-5	0.756458	MY2535
A	1e-5	0.758862	JU3128
A	1e-5	0.760836	NIC231
A	1e-5	0.762944	NIC528
A	1e-5	0.76489	JU3134
A	1e-5	0.765549	JU1172
A	1.8e-5	0.766152	ECA372
A	1e-5	0.770245	JU2566
A	1e-5	0.780312	JU2141
A	1e-5	0.780637	MY2530
A	1e-5	0.78102	JU1088
A	1e-5	0.782558	JU311
A	1e-5	0.785544	NIC267
A	1e-5	0.785725	JU561
A	1e-5	0.7884	JU397
A	1e-5	0.791614	JU2587
A	1e-5	0.792139	CB4852
A	1e-5	0.794023	NIC1107
A	1e-5	0.804639	MY920
A	0.043174	0.806142	QX1212
A	1e-5	0.809122	MY679
A	1e-5	0.815787	CB4855
A	1e-5	0.816724	JU2592
A	1e-5	0.830526	NIC275
A	1e-5	0.831556	JU2131
A	1e-5	0.83492	JU2575
A	1e-5	0.836765	NIC269
A	1e-5	0.840683	JU393
A	1e-5	0.842304	ECA189
A	1e-5	0.843273	XZ1513
A	1e-5	0.84473	ECA743
A	0.0127	0.845197	JU2106
A	1e-5	0.855294	QX1794
A	1e-5	0.855445	QX1233
A	1e-5	0.855784	CX11315
A	0.856741	0.856741	ECA706
A	1e-5	0.860267	QG556
A	1e-5	0.861778	JU1586
A	1e-5	0.865712	JU2513
A	1e-5	0.871335	NIC262
A	1e-5	0.87241	PB303
A	1e-5	0.875683	QX1793
A	1e-5	0.879196	MY16
A	1e-5	0.897654	JU1934
A	1e-5	0.909434	GXW1
A	1e-5	0.912188	JU778
A	1e-5	0.928485	ECA710
A	0.068154	0.931756	NIC252
A	1e-5	0.934359	ED3073
A	1e-5	0.945253	JU367
A	1e-5	0.954727	NIC236
A	1e-5	0.960228	MY2693
A	1e-5	0.968573	NIC272
A	1e-5	0.976914	JU1666
A	1e-5	0.97746	MY795
A	1e-5	0.991476	ECA724
A	1e-5	0.99253	JU751
A	1e-5	0.996153	JU2610
A	1e-5	0.997591	JU2600
A	1e-5	0.999881	ECA742
A	1.3e-5	0.999884	ECA723
A	1.1e-5	0.999887	JU3140
A	1.3e-5	0.999888	ECA36
A	1.2e-5	0.999889	JU2570
A	1e-5	0.999892	JU2250
A	1.6e-5	0.999892	JU3135
A	1e-5	0.999892	NIC514
A	1e-5	0.999894	XZ1514
A	1e-5	0.999895	ECA740
A	1e-5	0.999896	ECA777
A	1e-5	0.999896	ECA778
A	1e-5	0.999897	JU792
A	1e-5	0.999897	MY2585
A	1e-5	0.999897	NIC258
A	0.999898	0.999898	DL238
A	1e-5	0.999898	ECA741
A	1e-5	0.999898	ECA745
A	1e-5	0.999899	BRC20067
A	1e-5	0.999899	CB4857
A	1e-5	0.999899	ECA768
A	1e-5	0.999899	ECA812
A	1e-5	0.999899	JU2316
A	1.1e-5	0.999899	JU2526
A	1e-5	0.999899	MY2713
A	1e-5	0.999899	NIC265
A	1e-5	0.9999	CB4851
A	0.9999	0.9999	CB4856
A	1e-5	0.9999	CB4858
A	1e-5	0.9999	CX11262
A	1e-5	0.9999	CX11264
A	1e-5	0.9999	CX11314
A	1e-5	0.9999	ECA191
A	1e-5	0.9999	ECA252
A	1e-5	0.9999	ECA347
A	1e-5	0.9999	ECA348
A	1e-5	0.9999	ECA349
A	1e-5	0.9999	ECA363
A	0.9999	0.9999	ECA369
A	1e-5	0.9999	ECA396
A	0.9999	0.9999	ECA703
A	1e-5	0.9999	ECA705
A	1e-5	0.9999	ECA712
A	1e-5	0.9999	ECA722
A	1e-5	0.9999	ECA730
A	0.9999	0.9999	ECA732
A	0.9999	0.9999	ECA733
A	1e-5	0.9999	ECA744
A	1e-5	0.9999	ECA746
A	1e-5	0.9999	ECA760
A	1e-5	0.9999	ECA807
A	1e-5	0.9999	JU1213
A	1e-5	0.9999	JU1242
A	1e-5	0.9999	JU1249
A	1e-5	0.9999	JU1568
A	1e-5	0.9999	JU1580
A	1e-5	0.9999	JU1793
A	1e-5	0.9999	JU2257
A	1e-5	0.9999	JU2466
A	1e-5	0.9999	JU2522
A	1e-5	0.9999	JU2565
A	1e-5	0.9999	JU2581
A	1e-5	0.9999	JU2593
A	1e-5	0.9999	JU2825
A	1e-5	0.9999	JU2829
A	1e-5	0.9999	JU2866
A	1e-5	0.9999	JU3132
A	1e-5	0.9999	JU394
A	1e-5	0.9999	JU406
A	1e-5	0.9999	JU775
A	1e-5	0.9999	LKC34
A	1e-5	0.9999	LSJ1
A	1e-5	0.9999	MY18
A	1e-5	0.9999	N2
A	1e-5	0.9999	NIC261
A	1e-5	0.9999	NIC274
A	1e-5	0.9999	NIC276
A	1e-5	0.9999	NIC501
A	1e-5	0.9999	NIC513
A	1e-5	0.9999	PB306
A	1e-5	0.9999	PS2025
A	1e-5	0.9999	QG557
A	1e-5	0.9999	QX1211
A	1e-5	0.9999	RC301
B	0.129079	0.314001	NIC195
B	1e-5	0.327151	NIC526
B	1e-5	0.335005	ED3011
B	0.070774	0.351847	JU258
B	1e-5	0.366712	JU3144
B	0.042248	0.375155	NIC166
B	1e-5	0.377106	JU2478
B	0.254208	0.379173	JU2853
B	1e-5	0.38002	JU1400
B	0.007539	0.386104	QG2075
B	0.068426	0.40346	JU2017
B	0.162265	0.41168	JU3137
B	1e-5	0.416813	JU2879
B	1e-5	0.417336	NIC515
B	0.094386	0.420282	NIC522
B	0.003358	0.426445	JU2862
B	1e-5	0.430619	JU323
B	0.438872	0.438872	NIC242
B	1e-5	0.441877	CX11271
B	1e-5	0.452486	NIC268
B	1e-5	0.452711	MY518
B	1e-5	0.454041	JU2811
B	0.159879	0.456677	JU3125
B	1e-5	0.463138	NIC523
B	0.467065	0.467065	JU2800
B	1e-5	0.467578	NIC199
B	1e-5	0.484239	NIC3
B	0.490751	0.490751	MY2147
B	1e-5	0.493992	BRC20263
B	1e-5	0.494246	ED3046
B	1e-5	0.502314	JU2007
B	1e-5	0.502642	ED3049
B	1e-5	0.504377	WN2033
B	1e-5	0.505091	JU642
B	1.7e-5	0.506807	JU830
B	1e-5	0.507458	JU346
B	0.509916	0.509916	MY2453
B	1e-5	0.510437	MY23
B	1e-5	0.519928	QW947
B	0.520035	0.520035	JU2907
B	0.215485	0.520081	JU2906
B	1e-5	0.522272	QG536
B	0.025318	0.524188	JU2001
B	1e-5	0.533478	CB4854
B	0.12168	0.537535	NIC259
B	1e-5	0.537592	NIC1
B	1e-5	0.540785	ED3017
B	1e-5	0.542414	JU2578
B	0.457146	0.542764	AB1
B	1e-5	0.547199	JU2838
B	1e-5	0.549732	JU360
B	0.551605	0.551605	JU2234
B	1e-5	0.553552	JU2534
B	0.015965	0.554878	JU2576
B	0.107565	0.559108	QX1791
B	0.165206	0.566412	JU847
B	1e-5	0.569182	XZ1515
B	1e-5	0.569544	EG4349
B	0.024101	0.569549	EG4946
B	0.425122	0.574788	NIC2
B	1e-5	0.582604	JU1530
B	0.337599	0.582993	JU1652
B	1e-5	0.587041	JU310
B	1e-5	0.58748	ECA701
B	0.015529	0.591298	CX11276
B	1e-5	0.593241	EG4725
B	0.381514	0.593461	NIC1049
B	1e-5	0.59957	CX11307
B	0.604814	0.604814	CB4932
B	1e-5	0.604955	NIC277
B	1e-5	0.605505	JU2841
B	0.388676	0.60703	WN2050
B	0.18184	0.60954	JU3127
B	0.235821	0.611919	WN2002
B	1e-5	0.617716	JU2878
B	1e-5	0.617955	QX1792
B	1e-5	0.624069	MY10
B	1e-5	0.624136	XZ1516
B	0.027725	0.624523	NIC527
B	1e-5	0.626128	JU2464
B	1e-5	0.6276	KR314
B	1e-5	0.632621	MY1
B	1e-5	0.635893	JU1491
B	1e-5	0.641916	NIC256
B	1e-5	0.644812	JU1409
B	0.020153	0.64855	EG4724
B	0.648635	0.648635	JU440
B	0.65206	0.65206	JU1543
B	1e-5	0.653356	JU774
B	0.654548	0.654548	JU1896
B	1e-5	0.655669	JU2586
B	1e-5	0.656296	CX11254
B	0.103112	0.65758	JU1581
B	0.340119	0.659791	MY2573
B	1e-5	0.662305	CX11285
B	1e-5	0.664857	NIC511
B	1e-5	0.666187	MY2741
B	1e-5	0.66968	JU782
B	1e-5	0.670023	WN2001
B	0.046455	0.670979	NIC207
B	0.252131	0.671094	NIC266
B	1e-5	0.674056	JU2619
B	0.261096	0.675313	EG4347
B	1e-5	0.677598	ED3005
B	0.207636	0.679449	NIC255
B	1.7e-5	0.679556	ED3048
B	0.682998	0.682998	JU1200
B	0.069957	0.685008	NIC529
B	0.135212	0.685022	JU1808
B	1e-5	0.686517	JU2016
B	0.006749	0.687095	JU1440
B	0.689435	0.689435	JU1792
B	0.160151	0.690335	JT11398
B	1e-5	0.691917	NIC271
B	1e-5	0.692965	CB4853
B	0.04759	0.699168	NIC251
B	1e-5	0.701671	NIC260
B	0.007009	0.707546	MY772
B	0.709448	0.709448	JU2572
B	1.7e-5	0.713829	JU2519
B	1e-5	0.720652	ECA738
B	0.72135	0.72135	ED3012
B	1e-5	0.721979	ED3040
B	0.054011	0.722598	DL226
B	0.725328	0.725328	JU1212
B	1e-5	0.727048	CX11292
B	1e-5	0.730147	MY2212
B	0.269674	0.730226	PX179
B	1e-5	0.736236	DL200
B	0.25326	0.746648	JU1395
B	1e-5	0.74927	ED3052
B	0.250224	0.749686	JU1246
B	1e-5	0.75534	ED3077
B	1e-5	0.756458	MY2535
B	0.002708	0.758862	JU3128
B	1e-5	0.760836	NIC231
B	1e-5	0.762944	NIC528
B	0.016018	0.76489	JU3134
B	1e-5	0.765549	JU1172
B	1e-5	0.766152	ECA372
B	0.770245	0.770245	JU2566
B	0.219596	0.780312	JU2141
B	1e-5	0.780637	MY2530
B	1e-5	0.78102	JU1088
B	0.782558	0.782558	JU311
B	1e-5	0.785544	NIC267
B	0.194369	0.785725	JU561
B	0.211507	0.7884	JU397
B	1e-5	0.791614	JU2587
B	0.207768	0.792139	CB4852
B	0.794023	0.794023	NIC1107
B	1e-5	0.804639	MY920
B	1e-5	0.806142	QX1212
B	1e-5	0.809122	MY679
B	1e-5	0.815787	CB4855
B	0.816724	0.816724	JU2592
B	1e-5	0.830526	NIC275
B	0.034485	0.831556	JU2131
B	0.83492	0.83492	JU2575
B	1e-5	0.836765	NIC269
B	0.159227	0.840683	JU393
B	1e-5	0.842304	ECA189
B	1e-5	0.843273	XZ1513
B	0.044726	0.84473	ECA743
B	0.142023	0.845197	JU2106
B	1e-5	0.855294	QX1794
B	1e-5	0.855445	QX1233
B	1e-5	0.855784	CX11315
B	1e-5	0.856741	ECA706
B	1e-5	0.860267	QG556
B	0.861778	0.861778	JU1586
B	0.072771	0.865712	JU2513
B	1e-5	0.871335	NIC262
B	1e-5	0.87241	PB303
B	1e-5	0.875683	QX1793
B	1e-5	0.879196	MY16
B	0.102256	0.897654	JU1934
B	1e-5	0.909434	GXW1
B	1e-5	0.912188	JU778
B	1e-5	0.928485	ECA710
B	1e-5	0.931756	NIC252
B	1e-5	0.934359	ED3073
B	0.945253	0.945253	JU367
B	1e-5	0.954727	NIC236
B	1e-5	0.960228	MY2693
B	1e-5	0.968573	NIC272
B	0.022996	0.976914	JU1666
B	0.02245	0.97746	MY795
B	1e-5	0.991476	ECA724
B	1e-5	0.99253	JU751
B	1e-5	0.996153	JU2610
B	1e-5	0.997591	JU2600
B	1.2e-5	0.999881	ECA742
B	1.6e-5	0.999884	ECA723
B	1.4e-5	0.999887	JU3140
B	1.9e-5	0.999888	ECA36
B	1.1e-5	0.999889	JU2570
B	1e-5	0.999892	JU2250
B	1.2e-5	0.999892	JU3135
B	1e-5	0.999892	NIC514
B	1.2e-5	0.999894	XZ1514
B	1e-5	0.999895	ECA740
B	1e-5	0.999896	ECA777
B	1e-5	0.999896	ECA778
B	1e-5	0.999897	JU792
B	1e-5	0.999897	MY2585
B	1e-5	0.999897	NIC258
B	1e-5	0.999898	DL238
B	1e-5	0.999898	ECA741
B	1e-5	0.999898	ECA745
B	1e-5	0.999899	BRC20067
B	1e-5	0.999899	CB4857
B	1e-5	0.999899	ECA768
B	1e-5	0.999899	ECA812
B	1e-5	0.999899	JU2316
B	1e-5	0.999899	JU2526
B	1e-5	0.999899	MY2713
B	1e-5	0.999899	NIC265
B	0.9999	0.9999	CB4851
B	1e-5	0.9999	CB4856
B	1e-5	0.9999	CB4858
B	1e-5	0.9999	CX11262
B	1e-5	0.9999	CX11264
B	1e-5	0.9999	CX11314
B	1e-5	0.9999	ECA191
B	0.9999	0.9999	ECA252
B	1e-5	0.9999	ECA347
B	1e-5	0.9999	ECA348
B	1e-5	0.9999	ECA349
B	1e-5	0.9999	ECA363
B	1e-5	0.9999	ECA369
B	1e-5	0.9999	ECA396
B	1e-5	0.9999	ECA703
B	1e-5	0.9999	ECA705
B	1e-5	0.9999	ECA712
B	1e-5	0.9999	ECA722
B	1e-5	0.9999	ECA730
B	1e-5	0.9999	ECA732
B	1e-5	0.9999	ECA733
B	1e-5	0.9999	ECA744
B	1e-5	0.9999	ECA746
B	1e-5	0.9999	ECA760
B	1e-5	0.9999	ECA807
B	1e-5	0.9999	JU1213
B	1e-5	0.9999	JU1242
B	0.9999	0.9999	JU1249
B	0.9999	0.9999	JU1568
B	1e-5	0.9999	JU1580
B	1e-5	0.9999	JU1793
B	0.9999	0.9999	JU2257
B	1e-5	0.9999	JU2466
B	1e-5	0.9999	JU2522
B	0.9999	0.9999	JU2565
B	1e-5	0.9999	JU2581
B	1e-5	0.9999	JU2593
B	0.9999	0.9999	JU2825
B	1e-5	0.9999	JU2829
B	1e-5	0.9999	JU2866
B	1e-5	0.9999	JU3132
B	0.9999	0.9999	JU394
B	0.9999	0.9999	JU406
B	1e-5	0.9999	JU775
B	1e-5	0.9999	LKC34
B	0.9999	0.9999	LSJ1
B	1e-5	0.9999	MY18
B	0.9999	0.9999	N2
B	1e-5	0.9999	NIC261
B	1e-5	0.9999	NIC274
B	1e-5	0.9999	NIC276
B	1e-5	0.9999	NIC501
B	1e-5	0.9999	NIC513
B	1e-5	0.9999	PB306
B	1e-5	0.9999	PS2025
B	1e-5	0.9999	QG557
B	1e-5	0.9999	QX1211
B	1e-5	0.9999	RC301
C	1e-5	0.314001	NIC195
C	1e-5	0.327151	NIC526
C	0.335005	0.335005	ED3011
C	1e-5	0.351847	JU258
C	1e-5	0.366712	JU3144
C	1e-5	0.375155	NIC166
C	0.344298	0.377106	JU2478
C	1e-5	0.379173	JU2853
C	1e-5	0.38002	JU1400
C	0.097807	0.386104	QG2075
C	0.40346	0.40346	JU2017
C	1e-5	0.41168	JU3137
C	0.298322	0.416813	JU2879
C	1e-5	0.417336	NIC515
C	1e-5	0.420282	NIC522
C	0.426445	0.426445	JU2862
C	1e-5	0.430619	JU323
C	1e-5	0.438872	NIC242
C	0.271679	0.441877	CX11271
C	0.049807	0.452486	NIC268
C	0.412856	0.452711	MY518
C	0.017396	0.454041	JU2811
C	1e-5	0.456677	JU3125
C	1e-5	0.463138	NIC523
C	1e-5	0.467065	JU2800
C	1e-5	0.467578	NIC199
C	0.021269	0.484239	NIC3
C	1e-5	0.490751	MY2147
C	0.019301	0.493992	BRC20263
C	1e-5	0.494246	ED3046
C	1e-5	0.502314	JU2007
C	1e-5	0.502642	ED3049
C	1e-5	0.504377	WN2033
C	1e-5	0.505091	JU642
C	1e-5	0.506807	JU830
C	1e-5	0.507458	JU346
C	1e-5	0.509916	MY2453
C	1e-5	0.510437	MY23
C	1e-5	0.519928	QW947
C	1e-5	0.520035	JU2907
C	1e-5	0.520081	JU2906
C	0.089958	0.522272	QG536
C	1e-5	0.524188	JU2001
C	1e-5	0.533478	CB4854
C	1e-5	0.537535	NIC259
C	1e-5	0.537592	NIC1
C	1e-5	0.540785	ED3017
C	1e-5	0.542414	JU2578
C	1e-5	0.542764	AB1
C	0.048379	0.547199	JU2838
C	1e-5	0.549732	JU360
C	1e-5	0.551605	JU2234
C	1e-5	0.553552	JU2534
C	1e-5	0.554878	JU2576
C	0.137053	0.559108	QX1791
C	1e-5	0.566412	JU847
C	0.334387	0.569182	XZ1515
C	1e-5	0.569544	EG4349
C	0.406269	0.569549	EG4946
C	1e-5	0.574788	NIC2
C	1e-5	0.582604	JU1530
C	1e-5	0.582993	JU1652
C	1e-5	0.587041	JU310
C	1e-5	0.58748	ECA701
C	0.591298	0.591298	CX11276
C	1e-5	0.593241	EG4725
C	1e-5	0.593461	NIC1049
C	0.59957	0.59957	CX11307
C	1e-5	0.604814	CB4932
C	1e-5	0.604955	NIC277
C	1e-5	0.605505	JU2841
C	1e-5	0.60703	WN2050
C	1e-5	0.60954	JU3127
C	1e-5	0.611919	WN2002
C	0.18473	0.617716	JU2878
C	1e-5	0.617955	QX1792
C	1e-5	0.624069	MY10
C	1e-5	0.624136	XZ1516
C	1e-5	0.624523	NIC527
C	1e-5	0.626128	JU2464
C	0.066172	0.6276	KR314
C	1e-5	0.632621	MY1
C	1e-5	0.635893	JU1491
C	1e-5	0.641916	NIC256
C	1e-5	0.644812	JU1409
C	1e-5	0.64855	EG4724
C	1e-5	0.648635	JU440
C	1e-5	0.65206	JU1543
C	1e-5	0.653356	JU774
C	1e-5	0.654548	JU1896
C	1e-5	0.655669	JU2586
C	0.656296	0.656296	CX11254
C	1e-5	0.65758	JU1581
C	1e-5	0.659791	MY2573
C	0.662305	0.662305	CX11285
C	1e-5	0.664857	NIC511
C	1e-5	0.666187	MY2741
C	1e-5	0.66968	JU782
C	1e-5	0.670023	WN2001
C	1e-5	0.670979	NIC207
C	1e-5	0.671094	NIC266
C	0.177774	0.674056	JU2619
C	0.063511	0.675313	EG4347
C	0.262562	0.677598	ED3005
C	1e-5	0.679449	NIC255
C	1e-5	0.679556	ED3048
C	1e-5	0.682998	JU1200
C	1e-5	0.685008	NIC529
C	2e-5	0.685022	JU1808
C	0.686517	0.686517	JU2016
C	1e-5	0.687095	JU1440
C	1e-5	0.689435	JU1792
C	1e-5	0.690335	JT11398
C	1e-5	0.691917	NIC271
C	0.692965	0.692965	CB4853
C	1e-5	0.699168	NIC251
C	1e-5	0.701671	NIC260
C	1e-5	0.707546	MY772
C	1e-5	0.709448	JU2572
C	1e-5	0.713829	JU2519
C	0.279258	0.720652	ECA738
C	1e-5	0.72135	ED3012
C	1e-5	0.721979	ED3040
C	0.722598	0.722598	DL226
C	1e-5	0.725328	JU1212
C	0.727048	0.727048	CX11292
C	1e-5	0.730147	MY2212
C	1e-5	0.730226	PX179
C	1e-5	0.736236	DL200
C	1e-5	0.746648	JU1395
C	1e-5	0.74927	ED3052
C	1e-5	0.749686	JU1246
C	1e-5	0.75534	ED3077
C	1e-5	0.756458	MY2535
C	1e-5	0.758862	JU3128
C	1e-5	0.760836	NIC231
C	1e-5	0.762944	NIC528
C	1e-5	0.76489	JU3134
C	0.765549	0.765549	JU1172
C	0.232283	0.766152	ECA372
C	1e-5	0.770245	JU2566
C	1e-5	0.780312	JU2141
C	1e-5	0.780637	MY2530
C	1e-5	0.78102	JU1088
C	1e-5	0.782558	JU311
C	1e-5	0.785544	NIC267
C	1e-5	0.785725	JU561
C	1e-5	0.7884	JU397
C	1e-5	0.791614	JU2587
C	1e-5	0.792139	CB4852
C	1.2e-5	0.794023	NIC1107
C	1e-5	0.804639	MY920
C	0.806142	0.806142	QX1212
C	1e-5	0.809122	MY679
C	0.815787	0.815787	CB4855
C	1e-5	0.816724	JU2592
C	1e-5	0.830526	NIC275
C	1e-5	0.831556	JU2131
C	1.5e-5	0.83492	JU2575
C	1e-5	0.836765	NIC269
C	1e-5	0.840683	JU393
C	0.157606	0.842304	ECA189
C	0.156637	0.843273	XZ1513
C	0.025694	0.84473	ECA743
C	1e-5	0.845197	JU2106
C	0.10701	0.855294	QX1794
C	0.855445	0.855445	QX1233
C	0.855784	0.855784	CX11315
C	1e-5	0.856741	ECA706
C	0.860267	0.860267	QG556
C	1e-5	0.861778	JU1586
C	1e-5	0.865712	JU2513
C	1e-5	0.871335	NIC262
C	0.1275	0.87241	PB303
C	1e-5	0.875683	QX1793
C	1e-5	0.879196	MY16
C	1e-5	0.897654	JU1934
C	1e-5	0.909434	GXW1
C	1e-5	0.912188	JU778
C	0.071425	0.928485	ECA710
C	1e-5	0.931756	NIC252
C	1e-5	0.934359	ED3073
C	1e-5	0.945253	JU367
C	1e-5	0.954727	NIC236
C	1e-5	0.960228	MY2693
C	1e-5	0.968573	NIC272
C	1e-5	0.976914	JU1666
C	1e-5	0.97746	MY795
C	0.008431	0.991476	ECA724
C	1e-5	0.99253	JU751
C	1e-5	0.996153	JU2610
C	1e-5	0.997591	JU2600
C	1e-5	0.999881	ECA742
C	1e-5	0.999884	ECA723
C	1e-5	0.999887	JU3140
C	1e-5	0.999888	ECA36
C	1e-5	0.999889	JU2570
C	1e-5	0.999892	JU2250
C	1e-5	0.999892	JU3135
C	1.8e-5	0.999892	NIC514
C	1e-5	0.999894	XZ1514
C	1e-5	0.999895	ECA740
C	1e-5	0.999896	ECA777
C	1e-5	0.999896	ECA778
C	1e-5	0.999897	JU792
C	1e-5	0.999897	MY2585
C	1e-5	0.999897	NIC258
C	1e-5	0.999898	DL238
C	1e-5	0.999898	ECA741
C	1e-5	0.999898	ECA745
C	1e-5	0.999899	BRC20067
C	0.999899	0.999899	CB4857
C	1e-5	0.999899	ECA768
C	1e-5	0.999899	ECA812
C	1e-5	0.999899	JU2316
C	1e-5	0.999899	JU2526
C	1e-5	0.999899	MY2713
C	1e-5	0.999899	NIC265
C	1e-5	0.9999	CB4851
C	1e-5	0.9999	CB4856
C	0.9999	0.9999	CB4858
C	0.9999	0.9999	CX11262
C	0.9999	0.9999	CX11264
C	0.9999	0.9999	CX11314
C	1e-5	0.9999	ECA191
C	1e-5	0.9999	ECA252
C	1e-5	0.9999	ECA347
C	0.9999	0.9999	ECA348
C	0.9999	0.9999	ECA349
C	1e-5	0.9999	ECA363
C	1e-5	0.9999	ECA369
C	1e-5	0.9999	ECA396
C	1e-5	0.9999	ECA703
C	1e-5	0.9999	ECA705
C	1e-5	0.9999	ECA712
C	1e-5	0.9999	ECA722
C	1e-5	0.9999	ECA730
C	1e-5	0.9999	ECA732
C	1e-5	0.9999	ECA733
C	1e-5	0.9999	ECA744
C	1e-5	0.9999	ECA746
C	1e-5	0.9999	ECA760
C	1e-5	0.9999	ECA807
C	1e-5	0.9999	JU1213
C	1e-5	0.9999	JU1242
C	1e-5	0.9999	JU1249
C	1e-5	0.9999	JU1568
C	1e-5	0.9999	JU1580
C	1e-5	0.9999	JU1793
C	1e-5	0.9999	JU2257
C	1e-5	0.9999	JU2466
C	1e-5	0.9999	JU2522
C	1e-5	0.9999	JU2565
C	1e-5	0.9999	JU2581
C	1e-5	0.9999	JU2593
C	1e-5	0.9999	JU2825
C	1e-5	0.9999	JU2829
C	0.9999	0.9999	JU2866
C	1e-5	0.9999	JU3132
C	1e-5	0.9999	JU394
C	1e-5	0.9999	JU406
C	1e-5	0.9999	JU775
C	1e-5	0.9999	LKC34
C	1e-5	0.9999	LSJ1
C	1e-5	0.9999	MY18
C	1e-5	0.9999	N2
C	1e-5	0.9999	NIC261
C	1e-5	0.9999	NIC274
C	1e-5	0.9999	NIC276
C	1e-5	0.9999	NIC501
C	1e-5	0.9999	NIC513
C	0.9999	0.9999	PB306
C	0.9999	0.9999	PS2025
C	0.9999	0.9999	QG557
C	1e-5	0.9999	QX1211
C	1e-5	0.9999	RC301
D	0.01215	0.314001	NIC195
D	0.268203	0.327151	NIC526
D	0.242701	0.335005	ED3011
D	1e-5	0.351847	JU258
D	0.322822	0.366712	JU3144
D	0.351926	0.375155	NIC166
D	0.278516	0.377106	JU2478
D	0.379173	0.379173	JU2853
D	0.204082	0.38002	JU1400
D	0.24636	0.386104	QG2075
D	0.272208	0.40346	JU2017
D	0.090919	0.41168	JU3137
D	0.076059	0.416813	JU2879
D	0.334146	0.417336	NIC515
D	0.420282	0.420282	NIC522
D	0.334683	0.426445	JU2862
D	0.372107	0.430619	JU323
D	0.044505	0.438872	NIC242
D	0.286364	0.441877	CX11271
D	1e-5	0.452486	NIC268
D	0.069194	0.452711	MY518
D	0.454041	0.454041	JU2811
D	0.383364	0.456677	JU3125
D	0.463138	0.463138	NIC523
D	0.159944	0.467065	JU2800
D	1e-5	0.467578	NIC199
D	0.463088	0.484239	NIC3
D	0.096592	0.490751	MY2147
D	0.493992	0.493992	BRC20263
D	0.352974	0.494246	ED3046
D	0.502314	0.502314	JU2007
D	0.348489	0.502642	ED3049
D	0.495533	0.504377	WN2033
D	0.505091	0.505091	JU642
D	0.42004	0.506807	JU830
D	0.507458	0.507458	JU346
D	0.10959	0.509916	MY2453
D	1e-5	0.510437	MY23
D	0.519928	0.519928	QW947
D	0.479872	0.520035	JU2907
D	0.520081	0.520081	JU2906
D	0.522272	0.522272	QG536
D	1e-5	0.524188	JU2001
D	0.533478	0.533478	CB4854
D	1e-5	0.537535	NIC259
D	0.537592	0.537592	NIC1
D	0.540785	0.540785	ED3017
D	0.457496	0.542414	JU2578
D	0.542764	0.542764	AB1
D	1e-5	0.547199	JU2838
D	0.386084	0.549732	JU360
D	0.404098	0.551605	JU2234
D	0.553552	0.553552	JU2534
D	0.336444	0.554878	JU2576
D	1e-5	0.559108	QX1791
D	0.267768	0.566412	JU847
D	1e-5	0.569182	XZ1515
D	0.222824	0.569544	EG4349
D	0.569549	0.569549	EG4946
D	0.574788	0.574788	NIC2
D	0.417306	0.582604	JU1530
D	0.582993	0.582993	JU1652
D	0.412869	0.587041	JU310
D	1e-5	0.58748	ECA701
D	0.185454	0.591298	CX11276
D	0.124487	0.593241	EG4725
D	0.024945	0.593461	NIC1049
D	0.183651	0.59957	CX11307
D	1e-5	0.604814	CB4932
D	0.394955	0.604955	NIC277
D	0.605505	0.605505	JU2841
D	1e-5	0.60703	WN2050
D	0.208539	0.60954	JU3127
D	0.611919	0.611919	WN2002
D	0.617716	0.617716	JU2878
D	0.220457	0.617955	QX1792
D	0.624069	0.624069	MY10
D	1e-5	0.624136	XZ1516
D	0.154581	0.624523	NIC527
D	0.626128	0.626128	JU2464
D	0.6276	0.6276	KR314
D	0.33299	0.632621	MY1
D	1e-5	0.635893	JU1491
D	1e-5	0.641916	NIC256
D	0.644812	0.644812	JU1409
D	0.20714	0.64855	EG4724
D	0.205326	0.648635	JU440
D	0.34785	0.65206	JU1543
D	0.288859	0.653356	JU774
D	0.313585	0.654548	JU1896
D	0.154338	0.655669	JU2586
D	1e-5	0.656296	CX11254
D	0.171678	0.65758	JU1581
D	1e-5	0.659791	MY2573
D	1e-5	0.662305	CX11285
D	0.664857	0.664857	NIC511
D	0.333723	0.666187	MY2741
D	0.026341	0.66968	JU782
D	1e-5	0.670023	WN2001
D	0.670979	0.670979	NIC207
D	1e-5	0.671094	NIC266
D	0.674056	0.674056	JU2619
D	0.675313	0.675313	EG4347
D	0.05976	0.677598	ED3005
D	0.679449	0.679449	NIC255
D	0.679556	0.679556	ED3048
D	0.316912	0.682998	JU1200
D	0.685008	0.685008	NIC529
D	1e-5	0.685022	JU1808
D	0.313393	0.686517	JU2016
D	0.687095	0.687095	JU1440
D	1e-5	0.689435	JU1792
D	0.690335	0.690335	JT11398
D	1e-5	0.691917	NIC271
D	0.306945	0.692965	CB4853
D	1e-5	0.699168	NIC251
D	0.066757	0.701671	NIC260
D	0.285364	0.707546	MY772
D	1e-5	0.709448	JU2572
D	1e-5	0.713829	JU2519
D	1e-5	0.720652	ECA738
D	0.27856	0.72135	ED3012
D	0.277931	0.721979	ED3040
D	0.137152	0.722598	DL226
D	1e-5	0.725328	JU1212
D	0.272862	0.727048	CX11292
D	0.730147	0.730147	MY2212
D	0.730226	0.730226	PX179
D	0.174635	0.736236	DL200
D	0.746648	0.746648	JU1395
D	0.25064	0.74927	ED3052
D	1e-5	0.749686	JU1246
D	0.75534	0.75534	ED3077
D	0.756458	0.756458	MY2535
D	0.758862	0.758862	JU3128
D	0.760836	0.760836	NIC231
D	0.762944	0.762944	NIC528
D	0.76489	0.76489	JU3134
D	0.234361	0.765549	JU1172
D	1e-5	0.766152	ECA372
D	0.113902	0.770245	JU2566
D	1e-5	0.780312	JU2141
D	0.780637	0.780637	MY2530
D	0.78102	0.78102	JU1088
D	0.065245	0.782558	JU311
D	0.214366	0.785544	NIC267
D	0.785725	0.785725	JU561
D	1e-5	0.7884	JU397
D	0.1127	0.791614	JU2587
D	0.792139	0.792139	CB4852
D	1e-5	0.794023	NIC1107
D	0.804639	0.804639	MY920
D	1e-5	0.806142	QX1212
D	0.809122	0.809122	MY679
D	0.184123	0.815787	CB4855
D	1e-5	0.816724	JU2592
D	0.169383	0.830526	NIC275
D	1e-5	0.831556	JU2131
D	1e-5	0.83492	JU2575
D	1e-5	0.836765	NIC269
D	1e-5	0.840683	JU393
D	1e-5	0.842304	ECA189
D	1e-5	0.843273	XZ1513
D	0.052205	0.84473	ECA743
D	1e-5	0.845197	JU2106
D	0.037616	0.855294	QX1794
D	0.144465	0.855445	QX1233
D	0.144126	0.855784	CX11315
D	1e-5	0.856741	ECA706
D	1e-5	0.860267	QG556
D	0.138132	0.861778	JU1586
D	0.865712	0.865712	JU2513
D	1e-5	0.871335	NIC262
D	0.87241	0.87241	PB303
D	1e-5	0.875683	QX1793
D	1e-5	0.879196	MY16
D	1e-5	0.897654	JU1934
D	0.909434	0.909434	GXW1
D	1e-5	0.912188	JU778
D	1e-5	0.928485	ECA710
D	1e-5	0.931756	NIC252
D	0.934359	0.934359	ED3073
D	0.054657	0.945253	JU367
D	1e-5	0.954727	NIC236
D	0.960228	0.960228	MY2693
D	1e-5	0.968573	NIC272
D	1e-5	0.976914	JU1666
D	1e-5	0.97746	MY795
D	1e-5	0.991476	ECA724
D	0.00738	0.99253	JU751
D	0.003757	0.996153	JU2610
D	0.002319	0.997591	JU2600
D	1e-5	0.999881	ECA742
D	1e-5	0.999884	ECA723
D	1.1e-5	0.999887	JU3140
D	1e-5	0.999888	ECA36
D	1e-5	0.999889	JU2570
D	1e-5	0.999892	JU2250
D	0.999892	0.999892	JU3135
D	1e-5	0.999892	NIC514
D	1e-5	0.999894	XZ1514
D	1e-5	0.999895	ECA740
D	1e-5	0.999896	ECA777
D	1e-5	0.999896	ECA778
D	1e-5	0.999897	JU792
D	0.999897	0.999897	MY2585
D	1e-5	0.999897	NIC258
D	1e-5	0.999898	DL238
D	1e-5	0.999898	ECA741
D	1.2e-5	0.999898	ECA745
D	0.999899	0.999899	BRC20067
D	1e-5	0.999899	CB4857
D	1.1e-5	0.999899	ECA768
D	1e-5	0.999899	ECA812
D	1e-5	0.999899	JU2316
D	1.1e-5	0.999899	JU2526
D	0.999899	0.999899	MY2713
D	1.1e-5	0.999899	NIC265
D	1e-5	0.9999	CB4851
D	1e-5	0.9999	CB4856
D	1e-5	0.9999	CB4858
D	1e-5	0.9999	CX11262
D	1e-5	0.9999	CX11264
D	1e-5	0.9999	CX11314
D	1e-5	0.9999	ECA191
D	1e-5	0.9999	ECA252
D	1e-5	0.9999	ECA347
D	1e-5	0.9999	ECA348
D	1e-5	0.9999	ECA349
D	1e-5	0.9999	ECA363
D	1e-5	0.9999	ECA369
D	1e-5	0.9999	ECA396
D	1e-5	0.9999	ECA703
D	1e-5	0.9999	ECA705
D	1e-5	0.9999	ECA712
D	1e-5	0.9999	ECA722
D	1e-5	0.9999	ECA730
D	1e-5	0.9999	ECA732
D	1e-5	0.9999	ECA733
D	1e-5	0.9999	ECA744
D	1e-5	0.9999	ECA746
D	1e-5	0.9999	ECA760
D	1e-5	0.9999	ECA807
D	1e-5	0.9999	JU1213
D	1e-5	0.9999	JU1242
D	1e-5	0.9999	JU1249
D	1e-5	0.9999	JU1568
D	1e-5	0.9999	JU1580
D	1e-5	0.9999	JU1793
D	1e-5	0.9999	JU2257
D	0.9999	0.9999	JU2466
D	1e-5	0.9999	JU2522
D	1e-5	0.9999	JU2565
D	1e-5	0.9999	JU2581
D	1e-5	0.9999	JU2593
D	1e-5	0.9999	JU2825
D	1e-5	0.9999	JU2829
D	1e-5	0.9999	JU2866
D	1e-5	0.9999	JU3132
D	1e-5	0.9999	JU394
D	1e-5	0.9999	JU406
D	1e-5	0.9999	JU775
D	1e-5	0.9999	LKC34
D	1e-5	0.9999	LSJ1
D	1e-5	0.9999	MY18
D	1e-5	0.9999	N2
D	1e-5	0.9999	NIC261
D	1e-5	0.9999	NIC274
D	1e-5	0.9999	NIC276
D	1e-5	0.9999	NIC501
D	1e-5	0.9999	NIC513
D	1e-5	0.9999	PB306
D	1e-5	0.9999	PS2025
D	1e-5	0.9999	QG557
D	1e-5	0.9999	QX1211
D	0.9999	0.9999	RC301
E	1e-5	0.314001	NIC195
E	1e-5	0.327151	NIC526
E	1e-5	0.335005	ED3011
E	1e-5	0.351847	JU258
E	1e-5	0.366712	JU3144
E	1e-5	0.375155	NIC166
E	1e-5	0.377106	JU2478
E	1e-5	0.379173	JU2853
E	1e-5	0.38002	JU1400
E	1e-5	0.386104	QG2075
E	1e-5	0.40346	JU2017
E	0.044108	0.41168	JU3137
E	0.208736	0.416813	JU2879
E	1e-5	0.417336	NIC515
E	1e-5	0.420282	NIC522
E	1e-5	0.426445	JU2862
E	1e-5	0.430619	JU323
E	1e-5	0.438872	NIC242
E	1e-5	0.441877	CX11271
E	0.048434	0.452486	NIC268
E	1e-5	0.452711	MY518
E	1e-5	0.454041	JU2811
E	1e-5	0.456677	JU3125
E	0.143358	0.463138	NIC523
E	1e-5	0.467065	JU2800
E	1e-5	0.467578	NIC199
E	1e-5	0.484239	NIC3
E	1e-5	0.490751	MY2147
E	1e-5	0.493992	BRC20263
E	1e-5	0.494246	ED3046
E	1e-5	0.502314	JU2007
E	1e-5	0.502642	ED3049
E	1e-5	0.504377	WN2033
E	1e-5	0.505091	JU642
E	1e-5	0.506807	JU830
E	1e-5	0.507458	JU346
E	1e-5	0.509916	MY2453
E	0.510437	0.510437	MY23
E	1e-5	0.519928	QW947
E	1e-5	0.520035	JU2907
E	1e-5	0.520081	JU2906
E	1e-5	0.522272	QG536
E	1e-5	0.524188	JU2001
E	1e-5	0.533478	CB4854
E	1e-5	0.537535	NIC259
E	1e-5	0.537592	NIC1
E	1e-5	0.540785	ED3017
E	1e-5	0.542414	JU2578
E	1e-5	0.542764	AB1
E	1e-5	0.547199	JU2838
E	1e-5	0.549732	JU360
E	1e-5	0.551605	JU2234
E	1e-5	0.553552	JU2534
E	1e-5	0.554878	JU2576
E	0.061847	0.559108	QX1791
E	1e-5	0.566412	JU847
E	0.569182	0.569182	XZ1515
E	1e-5	0.569544	EG4349
E	1e-5	0.569549	EG4946
E	1e-5	0.574788	NIC2
E	1e-5	0.582604	JU1530
E	1e-5	0.582993	JU1652
E	1e-5	0.587041	JU310
E	1e-5	0.58748	ECA701
E	1e-5	0.591298	CX11276
E	1e-5	0.593241	EG4725
E	1e-5	0.593461	NIC1049
E	1e-5	0.59957	CX11307
E	1e-5	0.604814	CB4932
E	1e-5	0.604955	NIC277
E	1e-5	0.605505	JU2841
E	1e-5	0.60703	WN2050
E	1e-5	0.60954	JU3127
E	1e-5	0.611919	WN2002
E	1e-5	0.617716	JU2878
E	0.617955	0.617955	QX1792
E	1e-5	0.624069	MY10
E	1e-5	0.624136	XZ1516
E	1e-5	0.624523	NIC527
E	1e-5	0.626128	JU2464
E	1e-5	0.6276	KR314
E	1e-5	0.632621	MY1
E	1e-5	0.635893	JU1491
E	1e-5	0.641916	NIC256
E	1e-5	0.644812	JU1409
E	1e-5	0.64855	EG4724
E	1e-5	0.648635	JU440
E	1e-5	0.65206	JU1543
E	0.057705	0.653356	JU774
E	1e-5	0.654548	JU1896
E	1e-5	0.655669	JU2586
E	1e-5	0.656296	CX11254
E	1e-5	0.65758	JU1581
E	1e-5	0.659791	MY2573
E	1e-5	0.662305	CX11285
E	1e-5	0.664857	NIC511
E	1e-5	0.666187	MY2741
E	1e-5	0.66968	JU782
E	1e-5	0.670023	WN2001
E	1e-5	0.670979	NIC207
E	1e-5	0.671094	NIC266
E	1e-5	0.674056	JU2619
E	1e-5	0.675313	EG4347
E	1e-5	0.677598	ED3005
E	1e-5	0.679449	NIC255
E	1e-5	0.679556	ED3048
E	1e-5	0.682998	JU1200
E	1e-5	0.685008	NIC529
E	1e-5	0.685022	JU1808
E	1e-5	0.686517	JU2016
E	1e-5	0.687095	JU1440
E	1e-5	0.689435	JU1792
E	1e-5	0.690335	JT11398
E	1e-5	0.691917	NIC271
E	1e-5	0.692965	CB4853
E	1e-5	0.699168	NIC251
E	1.5e-5	0.701671	NIC260
E	1e-5	0.707546	MY772
E	1e-5	0.709448	JU2572
E	1e-5	0.713829	JU2519
E	0.720652	0.720652	ECA738
E	1e-5	0.72135	ED3012
E	1e-5	0.721979	ED3040
E	1e-5	0.722598	DL226
E	1.1e-5	0.725328	JU1212
E	1e-5	0.727048	CX11292
E	1e-5	0.730147	MY2212
E	1e-5	0.730226	PX179
E	1e-5	0.736236	DL200
E	1e-5	0.746648	JU1395
E	1e-5	0.74927	ED3052
E	1e-5	0.749686	JU1246
E	1e-5	0.75534	ED3077
E	1e-5	0.756458	MY2535
E	1e-5	0.758862	JU3128
E	0.045083	0.760836	NIC231
E	1e-5	0.762944	NIC528
E	1e-5	0.76489	JU3134
E	1e-5	0.765549	JU1172
E	0.766152	0.766152	ECA372
E	1e-5	0.770245	JU2566
E	1.1e-5	0.780312	JU2141
E	1e-5	0.780637	MY2530
E	1e-5	0.78102	JU1088
E	1e-5	0.782558	JU311
E	1e-5	0.785544	NIC267
E	1e-5	0.785725	JU561
E	1.4e-5	0.7884	JU397
E	1e-5	0.791614	JU2587
E	1.3e-5	0.792139	CB4852
E	1e-5	0.794023	NIC1107
E	1e-5	0.804639	MY920
E	1e-5	0.806142	QX1212
E	1e-5	0.809122	MY679
E	1e-5	0.815787	CB4855
E	1e-5	0.816724	JU2592
E	1e-5	0.830526	NIC275
E	1e-5	0.831556	JU2131
E	1e-5	0.83492	JU2575
E	1e-5	0.836765	NIC269
E	1e-5	0.840683	JU393
E	0.842304	0.842304	ECA189
E	0.843273	0.843273	XZ1513
E	0.84473	0.84473	ECA743
E	1e-5	0.845197	JU2106
E	0.855294	0.855294	QX1794
E	1e-5	0.855445	QX1233
E	1e-5	0.855784	CX11315
E	0.143163	0.856741	ECA706
E	0.139643	0.860267	QG556
E	1e-5	0.861778	JU1586
E	1e-5	0.865712	JU2513
E	1e-5	0.871335	NIC262
E	1e-5	0.87241	PB303
E	0.875683	0.875683	QX1793
E	0.120714	0.879196	MY16
E	1e-5	0.897654	JU1934
E	1e-5	0.909434	GXW1
E	0.055318	0.912188	JU778
E	0.928485	0.928485	ECA710
E	1e-5	0.931756	NIC252
E	1e-5	0.934359	ED3073
E	1e-5	0.945253	JU367
E	1e-5	0.954727	NIC236
E	1e-5	0.960228	MY2693
E	1.1e-5	0.968573	NIC272
E	1e-5	0.976914	JU1666
E	1e-5	0.97746	MY795
E	1e-5	0.991476	ECA724
E	1e-5	0.99253	JU751
E	1e-5	0.996153	JU2610
E	1e-5	0.997591	JU2600
E	1.3e-5	0.999881	ECA742
E	1e-5	0.999884	ECA723
E	1e-5	0.999887	JU3140
E	1e-5	0.999888	ECA36
E	1e-5	0.999889	JU2570
E	1.8e-5	0.999892	JU2250
E	1e-5	0.999892	JU3135
E	1e-5	0.999892	NIC514
E	1e-5	0.999894	XZ1514
E	1e-5	0.999895	ECA740
E	0.999896	0.999896	ECA777
E	0.999896	0.999896	ECA778
E	1.3e-5	0.999897	JU792
E	1e-5	0.999897	MY2585
E	1e-5	0.999897	NIC258
E	1e-5	0.999898	DL238
E	1e-5	0.999898	ECA741
E	1e-5	0.999898	ECA745
E	1e-5	0.999899	BRC20067
E	1e-5	0.999899	CB4857
E	0.999899	0.999899	ECA768
E	0.999899	0.999899	ECA812
E	1e-5	0.999899	JU2316
E	1e-5	0.999899	JU2526
E	1e-5	0.999899	MY2713
E	1e-5	0.999899	NIC265
E	1e-5	0.9999	CB4851
E	1e-5	0.9999	CB4856
E	1e-5	0.9999	CB4858
E	1e-5	0.9999	CX11262
E	1e-5	0.9999	CX11264
E	1e-5	0.9999	CX11314
E	1e-5	0.9999	ECA191
E	1e-5	0.9999	ECA252
E	1e-5	0.9999	ECA347
E	1e-5	0.9999	ECA348
E	1e-5	0.9999	ECA349
E	1e-5	0.9999	ECA363
E	1e-5	0.9999	ECA369
E	1e-5	0.9999	ECA396
E	1e-5	0.9999	ECA703
E	0.9999	0.9999	ECA705
E	0.9999	0.9999	ECA712
E	1e-5	0.9999	ECA722
E	1e-5	0.9999	ECA730
E	1e-5	0.9999	ECA732
E	1e-5	0.9999	ECA733
E	1e-5	0.9999	ECA744
E	1e-5	0.9999	ECA746
E	0.9999	0.9999	ECA760
E	0.9999	0.9999	ECA807
E	1e-5	0.9999	JU1213
E	1e-5	0.9999	JU1242
E	1e-5	0.9999	JU1249
E	1e-5	0.9999	JU1568
E	1e-5	0.9999	JU1580
E	1e-5	0.9999	JU1793
E	1e-5	0.9999	JU2257
E	1e-5	0.9999	JU2466
E	1e-5	0.9999	JU2522
E	1e-5	0.9999	JU2565
E	1e-5	0.9999	JU2581
E	1e-5	0.9999	JU2593
E	1e-5	0.9999	JU2825
E	1e-5	0.9999	JU2829
E	1e-5	0.9999	JU2866
E	1e-5	0.9999	JU3132
E	1e-5	0.9999	JU394
E	1e-5	0.9999	JU406
E	1e-5	0.9999	JU775
E	1e-5	0.9999	LKC34
E	1e-5	0.9999	LSJ1
E	1e-5	0.9999	MY18
E	1e-5	0.9999	N2
E	1e-5	0.9999	NIC261
E	1e-5	0.9999	NIC274
E	1e-5	0.9999	NIC276
E	1e-5	0.9999	NIC501
E	1e-5	0.9999	NIC513
E	1e-5	0.9999	PB306
E	1e-5	0.9999	PS2025
E	1e-5	0.9999	QG557
E	1e-5	0.9999	QX1211
E	1e-5	0.9999	RC301
F	1e-5	0.314001	NIC195
F	1e-5	0.327151	NIC526
F	1e-5	0.335005	ED3011
F	1e-5	0.351847	JU258
F	1e-5	0.366712	JU3144
F	1e-5	0.375155	NIC166
F	1e-5	0.377106	JU2478
F	1e-5	0.379173	JU2853
F	1e-5	0.38002	JU1400
F	1e-5	0.386104	QG2075
F	1e-5	0.40346	JU2017
F	1e-5	0.41168	JU3137
F	1e-5	0.416813	JU2879
F	1e-5	0.417336	NIC515
F	1e-5	0.420282	NIC522
F	1e-5	0.426445	JU2862
F	1e-5	0.430619	JU323
F	1e-5	0.438872	NIC242
F	1e-5	0.441877	CX11271
F	1e-5	0.452486	NIC268
F	1e-5	0.452711	MY518
F	1e-5	0.454041	JU2811
F	1e-5	0.456677	JU3125
F	1.4e-5	0.463138	NIC523
F	1e-5	0.467065	JU2800
F	1e-5	0.467578	NIC199
F	1e-5	0.484239	NIC3
F	1e-5	0.490751	MY2147
F	1e-5	0.493992	BRC20263
F	1e-5	0.494246	ED3046
F	1e-5	0.502314	JU2007
F	1e-5	0.502642	ED3049
F	1e-5	0.504377	WN2033
F	1e-5	0.505091	JU642
F	1.3e-5	0.506807	JU830
F	1e-5	0.507458	JU346
F	1e-5	0.509916	MY2453
F	1e-5	0.510437	MY23
F	0.048502	0.519928	QW947
F	1e-5	0.520035	JU2907
F	1e-5	0.520081	JU2906
F	1e-5	0.522272	QG536
F	1.7e-5	0.524188	JU2001
F	1e-5	0.533478	CB4854
F	1e-5	0.537535	NIC259
F	1e-5	0.537592	NIC1
F	1e-5	0.540785	ED3017
F	1e-5	0.542414	JU2578
F	1e-5	0.542764	AB1
F	1e-5	0.547199	JU2838
F	1e-5	0.549732	JU360
F	1e-5	0.551605	JU2234
F	1e-5	0.553552	JU2534
F	1e-5	0.554878	JU2576
F	1e-5	0.559108	QX1791
F	1e-5	0.566412	JU847
F	0.096351	0.569182	XZ1515
F	1e-5	0.569544	EG4349
F	1e-5	0.569549	EG4946
F	1e-5	0.574788	NIC2
F	1e-5	0.582604	JU1530
F	1e-5	0.582993	JU1652
F	1e-5	0.587041	JU310
F	0.58748	0.58748	ECA701
F	1e-5	0.591298	CX11276
F	1e-5	0.593241	EG4725
F	1e-5	0.593461	NIC1049
F	1e-5	0.59957	CX11307
F	1e-5	0.604814	CB4932
F	1e-5	0.604955	NIC277
F	1e-5	0.605505	JU2841
F	1e-5	0.60703	WN2050
F	1e-5	0.60954	JU3127
F	1e-5	0.611919	WN2002
F	1e-5	0.617716	JU2878
F	1e-5	0.617955	QX1792
F	1e-5	0.624069	MY10
F	0.624136	0.624136	XZ1516
F	1e-5	0.624523	NIC527
F	1e-5	0.626128	JU2464
F	1e-5	0.6276	KR314
F	1e-5	0.632621	MY1
F	1e-5	0.635893	JU1491
F	1e-5	0.641916	NIC256
F	1e-5	0.644812	JU1409
F	1e-5	0.64855	EG4724
F	1e-5	0.648635	JU440
F	1e-5	0.65206	JU1543
F	1e-5	0.653356	JU774
F	1e-5	0.654548	JU1896
F	1e-5	0.655669	JU2586
F	1e-5	0.656296	CX11254
F	1e-5	0.65758	JU1581
F	1e-5	0.659791	MY2573
F	1e-5	0.662305	CX11285
F	1e-5	0.664857	NIC511
F	1e-5	0.666187	MY2741
F	1e-5	0.66968	JU782
F	1e-5	0.670023	WN2001
F	1.1e-5	0.670979	NIC207
F	1e-5	0.671094	NIC266
F	1e-5	0.674056	JU2619
F	1e-5	0.675313	EG4347
F	1e-5	0.677598	ED3005
F	1e-5	0.679449	NIC255
F	1e-5	0.679556	ED3048
F	1e-5	0.682998	JU1200
F	1e-5	0.685008	NIC529
F	1e-5	0.685022	JU1808
F	1e-5	0.686517	JU2016
F	1e-5	0.687095	JU1440
F	1e-5	0.689435	JU1792
F	1e-5	0.690335	JT11398
F	1e-5	0.691917	NIC271
F	1e-5	0.692965	CB4853
F	1e-5	0.699168	NIC251
F	1e-5	0.701671	NIC260
F	1e-5	0.707546	MY772
F	1e-5	0.709448	JU2572
F	1e-5	0.713829	JU2519
F	1e-5	0.720652	ECA738
F	1e-5	0.72135	ED3012
F	1e-5	0.721979	ED3040
F	1e-5	0.722598	DL226
F	1e-5	0.725328	JU1212
F	1e-5	0.727048	CX11292
F	1e-5	0.730147	MY2212
F	1e-5	0.730226	PX179
F	1e-5	0.736236	DL200
F	1e-5	0.746648	JU1395
F	1e-5	0.74927	ED3052
F	1e-5	0.749686	JU1246
F	1e-5	0.75534	ED3077
F	1e-5	0.756458	MY2535
F	1e-5	0.758862	JU3128
F	1e-5	0.760836	NIC231
F	1e-5	0.762944	NIC528
F	1e-5	0.76489	JU3134
F	1e-5	0.765549	JU1172
F	1e-5	0.766152	ECA372
F	1e-5	0.770245	JU2566
F	1.1e-5	0.780312	JU2141
F	1e-5	0.780637	MY2530
F	1e-5	0.78102	JU1088
F	1e-5	0.782558	JU311
F	1e-5	0.785544	NIC267
F	1e-5	0.785725	JU561
F	1e-5	0.7884	JU397
F	1e-5	0.791614	JU2587
F	1e-5	0.792139	CB4852
F	1e-5	0.794023	NIC1107
F	1e-5	0.804639	MY920
F	1e-5	0.806142	QX1212
F	1e-5	0.809122	MY679
F	1e-5	0.815787	CB4855
F	1e-5	0.816724	JU2592
F	1e-5	0.830526	NIC275
F	1e-5	0.831556	JU2131
F	1e-5	0.83492	JU2575
F	1e-5	0.836765	NIC269
F	1e-5	0.840683	JU393
F	1e-5	0.842304	ECA189
F	1e-5	0.843273	XZ1513
F	1e-5	0.84473	ECA743
F	1e-5	0.845197	JU2106
F	1e-5	0.855294	QX1794
F	1e-5	0.855445	QX1233
F	1e-5	0.855784	CX11315
F	1e-5	0.856741	ECA706
F	1e-5	0.860267	QG556
F	1e-5	0.861778	JU1586
F	1e-5	0.865712	JU2513
F	1e-5	0.871335	NIC262
F	1e-5	0.87241	PB303
F	1e-5	0.875683	QX1793
F	1e-5	0.879196	MY16
F	1e-5	0.897654	JU1934
F	1e-5	0.909434	GXW1
F	1e-5	0.912188	JU778
F	1e-5	0.928485	ECA710
F	1e-5	0.931756	NIC252
F	1e-5	0.934359	ED3073
F	1e-5	0.945253	JU367
F	1e-5	0.954727	NIC236
F	1e-5	0.960228	MY2693
F	1e-5	0.968573	NIC272
F	1e-5	0.976914	JU1666
F	1e-5	0.97746	MY795
F	0.991476	0.991476	ECA724
F	1e-5	0.99253	JU751
F	1e-5	0.996153	JU2610
F	1e-5	0.997591	JU2600
F	0.999881	0.999881	ECA742
F	1e-5	0.999884	ECA723
F	1e-5	0.999887	JU3140
F	0.999888	0.999888	ECA36
F	1e-5	0.999889	JU2570
F	1e-5	0.999892	JU2250
F	1e-5	0.999892	JU3135
F	1e-5	0.999892	NIC514
F	0.999894	0.999894	XZ1514
F	0.999895	0.999895	ECA740
F	1e-5	0.999896	ECA777
F	1e-5	0.999896	ECA778
F	1e-5	0.999897	JU792
F	1e-5	0.999897	MY2585
F	1e-5	0.999897	NIC258
F	1e-5	0.999898	DL238
F	0.999898	0.999898	ECA741
F	1e-5	0.999898	ECA745
F	1e-5	0.999899	BRC20067
F	1.1e-5	0.999899	CB4857
F	1e-5	0.999899	ECA768
F	1e-5	0.999899	ECA812
F	1e-5	0.999899	JU2316
F	1e-5	0.999899	JU2526
F	1e-5	0.999899	MY2713
F	1e-5	0.999899	NIC265
F	1e-5	0.9999	CB4851
F	1e-5	0.9999	CB4856
F	1e-5	0.9999	CB4858
F	1e-5	0.9999	CX11262
F	1e-5	0.9999	CX11264
F	1e-5	0.9999	CX11314
F	1e-5	0.9999	ECA191
F	1e-5	0.9999	ECA252
F	0.9999	0.9999	ECA347
F	1e-5	0.9999	ECA348
F	1e-5	0.9999	ECA349
F	0.9999	0.9999	ECA363
F	1e-5	0.9999	ECA369
F	1e-5	0.9999	ECA396
F	1e-5	0.9999	ECA703
F	1e-5	0.9999	ECA705
F	1e-5	0.9999	ECA712
F	1e-5	0.9999	ECA722
F	1e-5	0.9999	ECA730
F	1e-5	0.9999	ECA732
F	1e-5	0.9999	ECA733
F	1e-5	0.9999	ECA744
F	1e-5	0.9999	ECA746
F	1e-5	0.9999	ECA760
F	1e-5	0.9999	ECA807
F	1e-5	0.9999	JU1213
F	1e-5	0.9999	JU1242
F	1e-5	0.9999	JU1249
F	1e-5	0.9999	JU1568
F	1e-5	0.9999	JU1580
F	1e-5	0.9999	JU1793
F	1e-5	0.9999	JU2257
F	1e-5	0.9999	JU2466
F	1e-5	0.9999	JU2522
F	1e-5	0.9999	JU2565
F	1e-5	0.9999	JU2581
F	1e-5	0.9999	JU2593
F	1e-5	0.9999	JU2825
F	1e-5	0.9999	JU2829
F	1e-5	0.9999	JU2866
F	1e-5	0.9999	JU3132
F	1e-5	0.9999	JU394
F	1e-5	0.9999	JU406
F	1e-5	0.9999	JU775
F	1e-5	0.9999	LKC34
F	1e-5	0.9999	LSJ1
F	1e-5	0.9999	MY18
F	1e-5	0.9999	N2
F	1e-5	0.9999	NIC261
F	1e-5	0.9999	NIC274
F	1e-5	0.9999	NIC276
F	1e-5	0.9999	NIC501
F	1e-5	0.9999	NIC513
F	1e-5	0.9999	PB306
F	1e-5	0.9999	PS2025
F	1e-5	0.9999	QG557
F	0.9999	0.9999	QX1211
F	1e-5	0.9999	RC301
G	0.274649	0.314001	NIC195
G	0.079686	0.327151	NIC526
G	1e-5	0.335005	ED3011
G	0.351847	0.351847	JU258
G	1e-5	0.366712	JU3144
G	1e-5	0.375155	NIC166
G	1e-5	0.377106	JU2478
G	1e-5	0.379173	JU2853
G	0.045369	0.38002	JU1400
G	0.07614	0.386104	QG2075
G	1e-5	0.40346	JU2017
G	1e-5	0.41168	JU3137
G	1e-5	0.416813	JU2879
G	0.051678	0.417336	NIC515
G	0.050353	0.420282	NIC522
G	0.030298	0.426445	JU2862
G	1e-5	0.430619	JU323
G	1e-5	0.438872	NIC242
G	1e-5	0.441877	CX11271
G	1e-5	0.452486	NIC268
G	1e-5	0.452711	MY518
G	0.164015	0.454041	JU2811
G	1e-5	0.456677	JU3125
G	0.020281	0.463138	NIC523
G	1e-5	0.467065	JU2800
G	0.467578	0.467578	NIC199
G	1e-5	0.484239	NIC3
G	1e-5	0.490751	MY2147
G	1e-5	0.493992	BRC20263
G	1e-5	0.494246	ED3046
G	1e-5	0.502314	JU2007
G	1e-5	0.502642	ED3049
G	1e-5	0.504377	WN2033
G	1e-5	0.505091	JU642
G	1.6e-5	0.506807	JU830
G	1e-5	0.507458	JU346
G	1e-5	0.509916	MY2453
G	1e-5	0.510437	MY23
G	0.172277	0.519928	QW947
G	1.3e-5	0.520035	JU2907
G	1e-5	0.520081	JU2906
G	1e-5	0.522272	QG536
G	1e-5	0.524188	JU2001
G	1e-5	0.533478	CB4854
G	0.175711	0.537535	NIC259
G	1e-5	0.537592	NIC1
G	1e-5	0.540785	ED3017
G	1e-5	0.542414	JU2578
G	1e-5	0.542764	AB1
G	1e-5	0.547199	JU2838
G	1e-5	0.549732	JU360
G	0.044068	0.551605	JU2234
G	1e-5	0.553552	JU2534
G	1e-5	0.554878	JU2576
G	1e-5	0.559108	QX1791
G	1e-5	0.566412	JU847
G	1e-5	0.569182	XZ1515
G	0.014195	0.569544	EG4349
G	1e-5	0.569549	EG4946
G	1e-5	0.574788	NIC2
G	1e-5	0.582604	JU1530
G	0.079329	0.582993	JU1652
G	1e-5	0.587041	JU310
G	1e-5	0.58748	ECA701
G	1e-5	0.591298	CX11276
G	0.282191	0.593241	EG4725
G	1e-5	0.593461	NIC1049
G	0.038083	0.59957	CX11307
G	1e-5	0.604814	CB4932
G	1e-5	0.604955	NIC277
G	1e-5	0.605505	JU2841
G	1e-5	0.60703	WN2050
G	1e-5	0.60954	JU3127
G	0.148065	0.611919	WN2002
G	1e-5	0.617716	JU2878
G	1e-5	0.617955	QX1792
G	0.302755	0.624069	MY10
G	1e-5	0.624136	XZ1516
G	0.036296	0.624523	NIC527
G	1e-5	0.626128	JU2464
G	1e-5	0.6276	KR314
G	1e-5	0.632621	MY1
G	1e-5	0.635893	JU1491
G	0.641916	0.641916	NIC256
G	1e-5	0.644812	JU1409
G	1e-5	0.64855	EG4724
G	1e-5	0.648635	JU440
G	1e-5	0.65206	JU1543
G	1e-5	0.653356	JU774
G	1e-5	0.654548	JU1896
G	0.112716	0.655669	JU2586
G	1e-5	0.656296	CX11254
G	1e-5	0.65758	JU1581
G	1e-5	0.659791	MY2573
G	1e-5	0.662305	CX11285
G	1e-5	0.664857	NIC511
G	1e-5	0.666187	MY2741
G	0.66968	0.66968	JU782
G	0.261792	0.670023	WN2001
G	1e-5	0.670979	NIC207
G	0.04804	0.671094	NIC266
G	1e-5	0.674056	JU2619
G	1e-5	0.675313	EG4347
G	1e-5	0.677598	ED3005
G	1e-5	0.679449	NIC255
G	1e-5	0.679556	ED3048
G	1e-5	0.682998	JU1200
G	1e-5	0.685008	NIC529
G	1e-5	0.685022	JU1808
G	1e-5	0.686517	JU2016
G	1e-5	0.687095	JU1440
G	1e-5	0.689435	JU1792
G	1e-5	0.690335	JT11398
G	0.691917	0.691917	NIC271
G	1e-5	0.692965	CB4853
G	0.699168	0.699168	NIC251
G	0.701671	0.701671	NIC260
G	1e-5	0.707546	MY772
G	1e-5	0.709448	JU2572
G	0.713829	0.713829	JU2519
G	1e-5	0.720652	ECA738
G	1e-5	0.72135	ED3012
G	1e-5	0.721979	ED3040
G	1e-5	0.722598	DL226
G	1e-5	0.725328	JU1212
G	1e-5	0.727048	CX11292
G	1e-5	0.730147	MY2212
G	2e-5	0.730226	PX179
G	1e-5	0.736236	DL200
G	1e-5	0.746648	JU1395
G	1e-5	0.74927	ED3052
G	1e-5	0.749686	JU1246
G	0.002367	0.75534	ED3077
G	1e-5	0.756458	MY2535
G	0.012627	0.758862	JU3128
G	1e-5	0.760836	NIC231
G	1e-5	0.762944	NIC528
G	1e-5	0.76489	JU3134
G	1e-5	0.765549	JU1172
G	1e-5	0.766152	ECA372
G	1e-5	0.770245	JU2566
G	1e-5	0.780312	JU2141
G	1e-5	0.780637	MY2530
G	1e-5	0.78102	JU1088
G	1e-5	0.782558	JU311
G	1e-5	0.785544	NIC267
G	1e-5	0.785725	JU561
G	1e-5	0.7884	JU397
G	1e-5	0.791614	JU2587
G	1e-5	0.792139	CB4852
G	1e-5	0.794023	NIC1107
G	1e-5	0.804639	MY920
G	1e-5	0.806142	QX1212
G	1e-5	0.809122	MY679
G	1e-5	0.815787	CB4855
G	0.022935	0.816724	JU2592
G	1.1e-5	0.830526	NIC275
G	1e-5	0.831556	JU2131
G	1e-5	0.83492	JU2575
G	1e-5	0.836765	NIC269
G	1e-5	0.840683	JU393
G	1e-5	0.842304	ECA189
G	1e-5	0.843273	XZ1513
G	1e-5	0.84473	ECA743
G	1e-5	0.845197	JU2106
G	1e-5	0.855294	QX1794
G	1e-5	0.855445	QX1233
G	1e-5	0.855784	CX11315
G	1e-5	0.856741	ECA706
G	1e-5	0.860267	QG556
G	1e-5	0.861778	JU1586
G	1e-5	0.865712	JU2513
G	0.871335	0.871335	NIC262
G	1e-5	0.87241	PB303
G	1e-5	0.875683	QX1793
G	1e-5	0.879196	MY16
G	1e-5	0.897654	JU1934
G	1e-5	0.909434	GXW1
G	0.032413	0.912188	JU778
G	1e-5	0.928485	ECA710
G	1e-5	0.931756	NIC252
G	1e-5	0.934359	ED3073
G	1e-5	0.945253	JU367
G	1e-5	0.954727	NIC236
G	1e-5	0.960228	MY2693
G	1e-5	0.968573	NIC272
G	1e-5	0.976914	JU1666
G	1e-5	0.97746	MY795
G	1.3e-5	0.991476	ECA724
G	1e-5	0.99253	JU751
G	1e-5	0.996153	JU2610
G	1e-5	0.997591	JU2600
G	1e-5	0.999881	ECA742
G	1e-5	0.999884	ECA723
G	1e-5	0.999887	JU3140
G	1e-5	0.999888	ECA36
G	1e-5	0.999889	JU2570
G	1e-5	0.999892	JU2250
G	1e-5	0.999892	JU3135
G	1e-5	0.999892	NIC514
G	1e-5	0.999894	XZ1514
G	1e-5	0.999895	ECA740
G	1e-5	0.999896	ECA777
G	1e-5	0.999896	ECA778
G	1e-5	0.999897	JU792
G	1.3e-5	0.999897	MY2585
G	0.999897	0.999897	NIC258
G	1e-5	0.999898	DL238
G	1e-5	0.999898	ECA741
G	1e-5	0.999898	ECA745
G	1e-5	0.999899	BRC20067
G	1e-5	0.999899	CB4857
G	1e-5	0.999899	ECA768
G	1e-5	0.999899	ECA812
G	0.999899	0.999899	JU2316
G	0.999899	0.999899	JU2526
G	1.1e-5	0.999899	MY2713
G	0.999899	0.999899	NIC265
G	1e-5	0.9999	CB4851
G	1e-5	0.9999	CB4856
G	1e-5	0.9999	CB4858
G	1e-5	0.9999	CX11262
G	1e-5	0.9999	CX11264
G	1e-5	0.9999	CX11314
G	1e-5	0.9999	ECA191
G	1e-5	0.9999	ECA252
G	1e-5	0.9999	ECA347
G	1e-5	0.9999	ECA348
G	1e-5	0.9999	ECA349
G	1e-5	0.9999	ECA363
G	1e-5	0.9999	ECA369
G	1e-5	0.9999	ECA396
G	1e-5	0.9999	ECA703
G	1e-5	0.9999	ECA705
G	1e-5	0.9999	ECA712
G	1e-5	0.9999	ECA722
G	1e-5	0.9999	ECA730
G	1e-5	0.9999	ECA732
G	1e-5	0.9999	ECA733
G	1e-5	0.9999	ECA744
G	1e-5	0.9999	ECA746
G	1e-5	0.9999	ECA760
G	1e-5	0.9999	ECA807
G	1e-5	0.9999	JU1213
G	1e-5	0.9999	JU1242
G	1e-5	0.9999	JU1249
G	1e-5	0.9999	JU1568
G	1e-5	0.9999	JU1580
G	1e-5	0.9999	JU1793
G	1e-5	0.9999	JU2257
G	1e-5	0.9999	JU2466
G	1e-5	0.9999	JU2522
G	1e-5	0.9999	JU2565
G	1e-5	0.9999	JU2581
G	1e-5	0.9999	JU2593
G	1e-5	0.9999	JU2825
G	1e-5	0.9999	JU2829
G	1e-5	0.9999	JU2866
G	1e-5	0.9999	JU3132
G	1e-5	0.9999	JU394
G	1e-5	0.9999	JU406
G	0.9999	0.9999	JU775
G	1e-5	0.9999	LKC34
G	1e-5	0.9999	LSJ1
G	1e-5	0.9999	MY18
G	1e-5	0.9999	N2
G	0.9999	0.9999	NIC261
G	1e-5	0.9999	NIC274
G	1e-5	0.9999	NIC276
G	1e-5	0.9999	NIC501
G	1e-5	0.9999	NIC513
G	1e-5	0.9999	PB306
G	1e-5	0.9999	PS2025
G	1e-5	0.9999	QG557
G	1e-5	0.9999	QX1211
G	1e-5	0.9999	RC301
H	1e-5	0.314001	NIC195
H	1e-5	0.327151	NIC526
H	1e-5	0.335005	ED3011
H	1e-5	0.351847	JU258
H	1e-5	0.366712	JU3144
H	1e-5	0.375155	NIC166
H	1e-5	0.377106	JU2478
H	1e-5	0.379173	JU2853
H	1e-5	0.38002	JU1400
H	1e-5	0.386104	QG2075
H	1e-5	0.40346	JU2017
H	1e-5	0.41168	JU3137
H	1e-5	0.416813	JU2879
H	1e-5	0.417336	NIC515
H	1e-5	0.420282	NIC522
H	1e-5	0.426445	JU2862
H	1e-5	0.430619	JU323
H	1e-5	0.438872	NIC242
H	1e-5	0.441877	CX11271
H	1e-5	0.452486	NIC268
H	1e-5	0.452711	MY518
H	1.4e-5	0.454041	JU2811
H	1e-5	0.456677	JU3125
H	1e-5	0.463138	NIC523
H	1e-5	0.467065	JU2800
H	1e-5	0.467578	NIC199
H	1e-5	0.484239	NIC3
H	1e-5	0.490751	MY2147
H	1e-5	0.493992	BRC20263
H	1e-5	0.494246	ED3046
H	1e-5	0.502314	JU2007
H	1e-5	0.502642	ED3049
H	1e-5	0.504377	WN2033
H	1e-5	0.505091	JU642
H	1e-5	0.506807	JU830
H	1e-5	0.507458	JU346
H	1e-5	0.509916	MY2453
H	1e-5	0.510437	MY23
H	1e-5	0.519928	QW947
H	1e-5	0.520035	JU2907
H	1e-5	0.520081	JU2906
H	1e-5	0.522272	QG536
H	1e-5	0.524188	JU2001
H	1e-5	0.533478	CB4854
H	1e-5	0.537535	NIC259
H	1e-5	0.537592	NIC1
H	1e-5	0.540785	ED3017
H	1e-5	0.542414	JU2578
H	1e-5	0.542764	AB1
H	1e-5	0.547199	JU2838
H	1e-5	0.549732	JU360
H	1e-5	0.551605	JU2234
H	1e-5	0.553552	JU2534
H	1e-5	0.554878	JU2576
H	1e-5	0.559108	QX1791
H	1e-5	0.566412	JU847
H	1e-5	0.569182	XZ1515
H	1e-5	0.569544	EG4349
H	1.1e-5	0.569549	EG4946
H	1e-5	0.574788	NIC2
H	1e-5	0.582604	JU1530
H	1e-5	0.582993	JU1652
H	1e-5	0.587041	JU310
H	0.161626	0.58748	ECA701
H	1e-5	0.591298	CX11276
H	1e-5	0.593241	EG4725
H	1e-5	0.593461	NIC1049
[truncated: 1,037 more rows]
