# Supplementary material for: Deep sampling of Hawaiian Caenorhabditis elegans reveals high genetic diversity and admixture with global populations
Source: eLife journal article supplement (doi:10.7554/elife.50465), 2019-12-03
Supplement: supp [file elife-50465-supp-v1.zip › elife_poa_e50465_Figure_5_figure_supplement_3_source_data_1.csv]

isotype	max_pop_frac	pop_assignment	A	B	C	D	E	F	G	H	I	K	Hawaiian	latitude	longitude	isolation_date	start_date	end_date	nearest_station	station_distance	station_lat	station_lon	mean.temp	sd.temp
AB1	0.542764	D	1e-5	0.457146	1e-5	0.542764	1e-5	1e-5	1e-5	1e-5	1e-5	1e-5	FALSE	-34.93	138.59	1983-01-01	1982-07-05	1983-06-30	946720-99999	5.64112701982491	-34.95	138.533	16.3398361034164	5.47362720525348
BRC20067	0.999899	D	1e-5	1e-5	1e-5	0.999899	1e-5	1e-5	1e-5	1e-5	1.1e-5	1e-5	FALSE	24.072954	121.169736	2012-01-13	2011-07-17	2012-07-11	591580-99999	50.213899408329	24.15	120.683	23.9806385582011	5.03506982961551
BRC20263	0.493992	D	0.142338	1e-5	0.019301	0.493992	1e-5	1e-5	1e-5	1e-5	1e-5	1e-5	FALSE	-33.86748611	151.2069889	2014-08-04	2014-02-05	2015-01-31	947680-99999	2.04454034700732	-33.85	151.2	18.587996691674	4.01112111777535
CB4851	0.9999	B	1e-5	0.9999	1e-5	1e-5	1e-5	1e-5	1e-5	1e-5	1e-5	1e-5	FALSE	NA	NA	NA	NA	NA	NA	NA	NA	NA	NA	NA
CB4852	0.792139	D	1e-5	0.207768	1e-5	0.792139	1.3e-5	1e-5	1e-5	1e-5	1e-5	1e-5	FALSE	NA	NA	NA	NA	NA	NA	NA	NA	NA	NA	NA
CB4853	0.692965	C	1e-5	1e-5	0.692965	0.306945	1e-5	1e-5	1e-5	1e-5	1e-5	1e-5	FALSE	NA	NA	NA	NA	NA	NA	NA	NA	NA	NA	NA
CB4854	0.533478	D	1e-5	1e-5	1e-5	0.533478	1e-5	1e-5	1e-5	1e-5	1e-5	1e-5	FALSE	34.189	-118.131	1973-12-01	1973-06-04	1974-05-30	722890-93136	7.65557049651656	34.233	-118.067	13.5289704524469	7.9658825214811
CB4855	0.815787	C	1e-5	1e-5	0.815787	0.184123	1e-5	1e-5	1e-5	1e-5	1e-5	1e-5	FALSE	NA	NA	NA	NA	NA	NA	NA	NA	NA	NA	NA
CB4856	0.9999	A	0.9999	1e-5	1e-5	1e-5	1e-5	1e-5	1e-5	1e-5	1e-5	1e-5	TRUE	21.33	-157.86	1972-08-01	1972-02-03	1973-01-28	911820-22521	7.18897715063556	21.333	-157.917	24.3907894736842	2.02057560880435
CB4857	0.999899	C	1e-5	1e-5	0.999899	1e-5	1e-5	1.1e-5	1e-5	1e-5	1e-5	1e-5	FALSE	NA	NA	NA	NA	NA	NA	NA	NA	NA	NA	NA
CB4858	0.9999	C	1e-5	1e-5	0.9999	1e-5	1e-5	1e-5	1e-5	1e-5	1e-5	1e-5	FALSE	NA	NA	NA	NA	NA	NA	NA	NA	NA	NA	NA
CB4932	0.604814	B	1.9e-5	0.604814	1e-5	1e-5	1e-5	1e-5	1e-5	1.1e-5	0.395086	1e-5	FALSE	51.02	-3.1	1991-01-01	1990-07-05	1991-06-30	995210-99999	423.152749808854	53.1	2.2	10.0869448356084	4.53965339895648
CX11254	0.656296	C	1e-5	1e-5	0.656296	1e-5	1e-5	1e-5	1e-5	1e-5	1e-5	0.106087	FALSE	34.130138	-118.114835	2003-09-01	2003-03-05	2004-02-28	747043-99999	8.84484564697119	34.08	-118.03	19.4385964912281	4.92794078595345
CX11262	0.9999	C	1e-5	1e-5	0.9999	1e-5	1e-5	1e-5	1e-5	1e-5	1e-5	1e-5	FALSE	34.130138	-118.114835	2003-09-01	2003-03-05	2004-02-28	747043-99999	8.84484564697119	34.08	-118.03	19.4385964912281	4.92794078595345
CX11264	0.9999	C	1e-5	1e-5	0.9999	1e-5	1e-5	1e-5	1e-5	1e-5	1e-5	1e-5	FALSE	34.130138	-118.114835	2003-09-01	2003-03-05	2004-02-28	747043-99999	8.84484564697119	34.08	-118.03	19.4385964912281	4.92794078595345
CX11271	0.441877	J	1e-5	1e-5	0.271679	0.286364	1e-5	1e-5	1e-5	1e-5	1e-5	1e-5	FALSE	34.13712	-118.12532	2003-09-01	2003-03-05	2004-02-28	747043-99999	10.079555397594	34.08	-118.03	19.4385964912281	4.92794078595345
CX11276	0.591298	C	1e-5	0.015529	0.591298	0.185454	1e-5	1e-5	1e-5	1e-5	0.009696	1e-5	FALSE	34.20111	-118.21198	2003-09-01	2003-03-05	2004-02-28	722880-23152	13.4581654093146	34.201	-118.357	12.200809437737	2.04963502436832
CX11285	0.662305	C	1.1e-5	1e-5	0.662305	1e-5	1e-5	1e-5	1e-5	1e-5	1e-5	1e-5	FALSE	34.14331	-118.05496	2003-09-01	2003-03-05	2004-02-28	747043-99999	6.6184339110201	34.08	-118.03	19.4385964912281	4.92794078595345
CX11292	0.727048	C	1e-5	1e-5	0.727048	0.272862	1e-5	1e-5	1e-5	1e-5	1e-5	1e-5	FALSE	34.13531	-118.30582	2004-02-01	2003-08-05	2004-07-30	722880-23152	8.73170799874153	34.201	-118.357	17.40571131407	4.82240580672677
CX11307	0.59957	C	1e-5	1e-5	0.59957	0.183651	1e-5	1e-5	0.038083	1e-5	0.070271	0.050666	FALSE	34.12946	-118.10987	2013-09-03	2013-03-07	2014-03-02	747043-3165	8.76734452318245	34.083	-118.033	21.3232678524922	4.56487864561559
CX11314	0.9999	C	1e-5	1e-5	0.9999	1e-5	1e-5	1e-5	1e-5	1e-5	1e-5	1e-5	FALSE	34.12946	-118.10987	2003-09-01	2003-03-05	2004-02-28	747043-99999	8.4238793955801	34.08	-118.03	19.4385964912281	4.92794078595345
CX11315	0.855784	C	1e-5	1e-5	0.855784	0.144126	1e-5	1e-5	1e-5	1e-5	1e-5	1e-5	FALSE	34.12946	-118.10987	2013-09-03	2013-03-07	2014-03-02	747043-3165	8.76734452318245	34.083	-118.033	21.3232678524922	4.56487864561559
DL200	0.736236	I	1e-5	1e-5	1e-5	0.174635	1e-5	1e-5	1e-5	1e-5	0.736236	0.062074	FALSE	9.03	38.74	2007-12-01	2007-06-04	2008-05-29	634500-99999	8.66972756367877	9.033	38.75	17.2037457877924	2.0998577366195
DL226	0.722598	C	1e-5	0.054011	0.722598	0.137152	1e-5	1e-5	1e-5	2e-5	1e-5	0.015908	FALSE	44.5633	-123.2821	2008-01-01	2007-07-05	2008-06-29	726945-24202	7.03442598524573	44.483	-123.283	10.788994440513	6.42198631886255
DL238	0.999898	A	0.999898	1e-5	1e-5	1e-5	1e-5	1e-5	1e-5	1e-5	1.2e-5	1e-5	TRUE	19.11	-155.81	2008-07-15	2008-01-17	2009-01-11	999999-21514	53.0847735424682	19.535	-155.576	6.50306668590864	2.61363057267061
ECA189	0.842304	E	1e-5	1e-5	0.157606	1e-5	0.842304	1e-5	1e-5	1e-5	1e-5	1e-5	TRUE	19.423889	-155.2225	2014-07-09	2014-01-10	2015-01-05	999999-21515	28.5211669503849	19.645	-155.083	21.4590423091939	1.3439630596557
ECA191	0.9999	H	1e-5	1e-5	1e-5	1e-5	1e-5	1e-5	1e-5	0.9999	1e-5	1e-5	TRUE	19.424167	-155.221944	2014-07-09	2014-01-10	2015-01-05	999999-21515	28.4648172263879	19.645	-155.083	21.4590423091939	1.3439630596557
ECA252	0.9999	B	1e-5	0.9999	1e-5	1e-5	1e-5	1e-5	1e-5	1e-5	1e-5	1e-5	FALSE	34.1	-118.1	1973-06-01	1972-12-03	1973-11-28	722970-23129	32.2271352883243	33.817	-118.15	16.8055500466485	3.99136817834084
ECA347	0.9999	F	1e-5	1e-5	1e-5	1e-5	1e-5	0.9999	1e-5	1e-5	1e-5	1e-5	TRUE	19.438889	-155.303611	2016-02-07	2015-08-11	2016-08-05	999999-21514	30.5110005082429	19.535	-155.576	8.41792685374824	1.6380203845953
ECA348	0.9999	C	1e-5	1e-5	0.9999	1e-5	1e-5	1e-5	1e-5	1e-5	1e-5	1e-5	FALSE	37.775334	-122.253889	2015-12-30	2015-07-03	2016-06-27	724930-23230	6.6910495828873	37.721	-122.22	15.3491245363365	3.61652742838532
ECA349	0.9999	C	1e-5	1e-5	0.9999	1e-5	1e-5	1e-5	1e-5	1e-5	1e-5	1e-5	FALSE	32.765758	-117.236741	2016-02-09	2015-08-13	2016-08-07	722900-23188	6.1456865471213	32.734	-117.183	18.965317633037	3.69272279075763
ECA36	0.999888	F	1.3e-5	1.9e-5	1e-5	1e-5	1e-5	0.999888	1e-5	1e-5	1e-5	1e-5	FALSE	-36.893333	174.745529	2013-07-27	2013-01-28	2014-01-23	931100-99999	12.7933099443429	-37	174.8	15.6432934309458	3.35169397555402
ECA363	0.9999	F	1e-5	1e-5	1e-5	1e-5	1e-5	0.9999	1e-5	1e-5	1e-5	1e-5	TRUE	20.723611	-156.304444	2016-02-19	2015-08-23	2016-08-17	911900-22516	23.4414203142849	20.9	-156.428	24.6966727883329	1.95423532650122
ECA369	0.9999	A	0.9999	1e-5	1e-5	1e-5	1e-5	1e-5	1e-5	1e-5	1e-5	1e-5	TRUE	21.175556	-157.006389	2016-02-20	2015-08-24	2016-08-18	911860-22534	9.58084831548934	21.155	-157.096	24.0672325500395	1.81115453248833
ECA372	0.766152	E	1.8e-5	1e-5	0.232283	1e-5	0.766152	1e-5	1e-5	1e-5	1e-5	1e-5	TRUE	22.121667	-159.664444	2016-02-27	2015-08-31	2016-08-25	911620-22501	15.6878804165303	22.033	-159.783	25.2364478792736	1.7342041437763
ECA396	0.9999	H	1e-5	1e-5	1e-5	1e-5	1e-5	1e-5	1e-5	0.9999	1e-5	1e-5	TRUE	19.449831	-155.235493	2016-05-17	2015-11-19	2016-11-13	999999-21515	26.8862711667593	19.645	-155.083	21.4680723978023	1.24284985876481
ECA701	0.58748	F	0.250814	1e-5	1e-5	1e-5	1e-5	0.58748	1e-5	0.161626	1e-5	1e-5	TRUE	22.123283	-159.656428	2017-08-11	2017-02-12	2018-02-07	911620-22501	16.4494093160561	22.033	-159.783	25.8508674904214	5.90152713928574
ECA703	0.9999	A	0.9999	1e-5	1e-5	1e-5	1e-5	1e-5	1e-5	1e-5	1e-5	1e-5	TRUE	20.038831	-155.438922	2017-08-13	2017-02-14	2018-02-09	911977-21508	33.136171666664	19.76	-155.554	14.4286826521334	2.25675560005142
ECA705	0.9999	E	1e-5	1e-5	1e-5	1e-5	0.9999	1e-5	1e-5	1e-5	1e-5	1e-5	TRUE	20.038831	-155.438922	2017-08-13	2017-02-14	2018-02-09	911977-21508	33.136171666664	19.76	-155.554	14.4286826521334	2.25675560005142
ECA706	0.856741	A	0.856741	1e-5	1e-5	1e-5	0.143163	1e-5	1e-5	1.6e-5	1e-5	1e-5	TRUE	20.038831	-155.438922	2017-08-13	2017-02-14	2018-02-09	911977-21508	33.136171666664	19.76	-155.554	14.4286826521334	2.25675560005142
ECA710	0.928485	E	1e-5	1e-5	0.071425	1e-5	0.928485	1e-5	1e-5	1e-5	1e-5	1e-5	TRUE	20.039656	-155.438103	2017-08-13	2017-02-14	2018-02-09	911977-21508	33.2524584231708	19.76	-155.554	14.4286826521334	2.25675560005142
ECA712	0.9999	E	1e-5	1e-5	1e-5	1e-5	0.9999	1e-5	1e-5	1e-5	1e-5	1e-5	TRUE	19.423864	-155.222478	2017-08-14	2017-02-15	2018-02-10	999999-21515	28.522357483543	19.645	-155.083	21.4022862685093	1.48933532183186
ECA722	0.9999	H	1e-5	1e-5	1e-5	1e-5	1e-5	1e-5	1e-5	0.9999	1e-5	1e-5	TRUE	19.423975	-155.222625	2017-08-14	2017-02-15	2018-02-10	999999-21515	28.5197338610523	19.645	-155.083	21.4022862685093	1.48933532183186
ECA723	0.999884	H	1.3e-5	1.6e-5	1e-5	1e-5	1e-5	1e-5	1e-5	0.999884	1.7e-5	1e-5	TRUE	19.424272	-155.221661	2017-08-14	2017-02-15	2018-02-10	999999-21515	28.4396237153709	19.645	-155.083	21.4022862685093	1.48933532183186
ECA724	0.991476	F	1e-5	1e-5	0.008431	1e-5	1e-5	0.991476	1.3e-5	1e-5	1e-5	1e-5	TRUE	19.439144	-155.303825	2017-08-14	2017-02-15	2018-02-10	999999-21514	30.480086114088	19.535	-155.576	7.44656494413183	2.60911480922506
ECA730	0.9999	H	1e-5	1e-5	1e-5	1e-5	1e-5	1e-5	1e-5	0.9999	1e-5	1e-5	TRUE	19.423869	-155.222483	2017-08-14	2017-02-15	2018-02-10	999999-21515	28.5221516639686	19.645	-155.083	21.4022862685093	1.48933532183186
ECA732	0.9999	A	0.9999	1e-5	1e-5	1e-5	1e-5	1e-5	1e-5	1e-5	1e-5	1e-5	TRUE	19.115403	-155.81845	2017-08-15	2017-02-16	2018-02-11	999999-21514	52.9765616217729	19.535	-155.576	7.43929539965661	2.61054984439227
ECA733	0.9999	A	0.9999	1e-5	1e-5	1e-5	1e-5	1e-5	1e-5	1e-5	1e-5	1e-5	TRUE	19.115886	-155.818386	2017-08-15	2017-02-16	2018-02-11	999999-21514	52.9264370384421	19.535	-155.576	7.43929539965661	2.61054984439227
ECA738	0.720652	E	1e-5	1e-5	0.279258	1e-5	0.720652	1e-5	1e-5	1e-5	1e-5	1e-5	TRUE	21.13927631	-156.9740559	2017-08-12	2017-02-13	2018-02-08	911860-22534	12.7851907753177	21.155	-157.096	24.3739910758264	2.03375936985977
ECA740	0.999895	F	1e-5	1e-5	1e-5	1e-5	1e-5	0.999895	1e-5	1e-5	1.5e-5	1e-5	TRUE	20.670022	-156.339189	2017-08-14	2017-02-15	2018-02-10	911900-22516	27.124642175653	20.9	-156.428	24.6234827995406	1.96942023524896
ECA741	0.999898	F	1e-5	1e-5	1e-5	1e-5	1e-5	0.999898	1e-5	1.2e-5	1e-5	1e-5	TRUE	20.6762	-156.338322	2017-08-14	2017-02-15	2018-02-10	911900-22516	26.515577452759	20.9	-156.428	24.6234827995406	1.96942023524896
ECA742	0.999881	F	1e-5	1.2e-5	1e-5	1e-5	1.3e-5	0.999881	1e-5	1.6e-5	1e-5	1e-5	TRUE	20.80569	-156.2781	2017-08-16	2017-02-17	2018-02-12	911900-22516	18.8588379658789	20.899	-156.43	24.6038286575326	1.99059625215417
ECA743	0.84473	E	1e-5	0.044726	0.025694	0.052205	0.84473	1e-5	1e-5	1e-5	0.032585	1e-5	TRUE	20.741871	-156.32317	2017-08-16	2017-02-17	2018-02-12	911900-22516	20.6847788903935	20.899	-156.43	24.6038286575326	1.99059625215417
ECA744	0.9999	H	1e-5	1e-5	1e-5	1e-5	1e-5	1e-5	1e-5	0.9999	1e-5	1e-5	TRUE	19.719231	-155.949572	2017-08-15	2017-02-16	2018-02-11	911975-21510	10.5866535187862	19.736	-156.048	25.6339012744597	1.47954844269288
ECA745	0.999898	H	1e-5	1e-5	1e-5	1.2e-5	1e-5	1e-5	1e-5	0.999898	1e-5	1e-5	TRUE	19.700464	-155.955839	2017-08-15	2017-02-16	2018-02-11	911975-21510	10.5287719953135	19.736	-156.048	25.6339012744597	1.47954844269288
ECA746	0.9999	H	1e-5	1e-5	1e-5	1e-5	1e-5	1e-5	1e-5	0.9999	1e-5	1e-5	TRUE	19.115292	-155.819336	2017-08-15	2017-02-16	2018-02-11	999999-21514	53.0321697758918	19.535	-155.576	7.43929539965661	2.61054984439227
ECA760	0.9999	E	1e-5	1e-5	1e-5	1e-5	0.9999	1e-5	1e-5	1e-5	1e-5	1e-5	TRUE	20.039869	-155.441619	2017-08-17	2017-02-18	2018-02-13	911977-21508	33.1419032492745	19.76	-155.554	14.3584495960429	2.3066958855046
ECA768	0.999899	E	1e-5	1e-5	1e-5	1.1e-5	0.999899	1e-5	1e-5	1e-5	1e-5	1e-5	TRUE	20.039914	-155.441556	2017-08-17	2017-02-18	2018-02-13	911977-21508	33.1489024259487	19.76	-155.554	14.3584495960429	2.3066958855046
ECA777	0.999896	E	1e-5	1e-5	1e-5	1e-5	0.999896	1e-5	1e-5	1e-5	1.4e-5	1e-5	TRUE	20.039908	-155.441503	2017-08-17	2017-02-18	2018-02-13	911977-21508	33.1502532902558	19.76	-155.554	14.3584495960429	2.3066958855046
ECA778	0.999896	E	1e-5	1e-5	1e-5	1e-5	0.999896	1e-5	1e-5	1e-5	1.4e-5	1e-5	TRUE	20.039908	-155.441503	2017-08-17	2017-02-18	2018-02-13	911977-21508	33.1502532902558	19.76	-155.554	14.3584495960429	2.3066958855046
ECA807	0.9999	E	1e-5	1e-5	1e-5	1e-5	0.9999	1e-5	1e-5	1e-5	1e-5	1e-5	TRUE	20.039869	-155.441531	2017-08-17	2017-02-18	2018-02-13	911977-21508	33.1451762575246	19.76	-155.554	14.3584495960429	2.3066958855046
ECA812	0.999899	E	1e-5	1e-5	1e-5	1e-5	0.999899	1e-5	1e-5	1.1e-5	1e-5	1e-5	TRUE	20.039917	-155.441542	2017-08-17	2017-02-18	2018-02-13	911977-21508	33.1497335774101	19.76	-155.554	14.3584495960429	2.3066958855046
ED3005	0.677598	K	1e-5	1e-5	0.262562	0.05976	1e-5	1e-5	1e-5	1e-5	1e-5	0.677598	FALSE	55.94	-3.36	2004-10-25	2004-04-28	2005-04-23	104040-99999	786.456416558698	51.75	6.283	10.3501822911572	6.55986781142839
ED3011	0.335005	C	1e-5	1e-5	0.335005	0.242701	1e-5	1e-5	1e-5	1e-5	1e-5	0.286286	FALSE	55.92	-3.19	2004-11-11	2004-05-15	2005-05-10	104040-99999	776.301354342611	51.75	6.283	10.3498863600311	6.58098869982636
ED3012	0.72135	B	1e-5	0.72135	1e-5	0.27856	1e-5	1e-5	1e-5	1e-5	1e-5	1e-5	FALSE	55.92	-3.19	2004-11-26	2004-05-30	2005-05-25	104040-99999	776.301354342611	51.75	6.283	10.33135592805	6.58709648848289
ED3017	0.540785	D	1e-5	1e-5	1e-5	0.540785	1e-5	1e-5	1e-5	1e-5	0.459125	1e-5	FALSE	55.92	-3.19	2004-12-03	2004-06-06	2005-06-01	104040-99999	776.301354342611	51.75	6.283	10.3852684138034	6.66952990410484
ED3040	0.721979	J	1e-5	1e-5	1e-5	0.277931	1e-5	1e-5	1e-5	1e-5	1e-5	1e-5	FALSE	-26.166667	28.016667	2006-05-05	2005-11-06	2006-11-01	682672-99999	2.48730295630543	-26.15	28	14.614762117872	4.49662791565334
ED3046	0.494246	J	1e-5	1e-5	1e-5	0.352974	1e-5	1e-5	1e-5	1e-5	0.1527	1e-5	FALSE	-33.366667	19.316667	2006-05-05	2005-11-06	2006-11-01	688210-99999	31.0819358380812	-33.617	19.467	17.3322945521699	5.05119148085574
ED3048	0.679556	D	1.4e-5	1.7e-5	1e-5	0.679556	1e-5	1e-5	1e-5	1e-5	1e-5	1e-5	FALSE	-33.366667	19.316667	2006-04-02	2005-10-04	2006-09-29	688210-99999	31.0819358380812	-33.617	19.467	17.336241920591	5.05476863576019
ED3049	0.502642	J	1e-5	1e-5	1e-5	0.348489	1e-5	1e-5	1e-5	1e-5	0.148789	1e-5	FALSE	-33.366667	19.316667	2006-04-02	2005-10-04	2006-09-29	688210-99999	31.0819358380812	-33.617	19.467	17.336241920591	5.05476863576019
ED3052	0.74927	J	1e-5	1e-5	1e-5	0.25064	1e-5	1e-5	1e-5	1e-5	1e-5	1e-5	FALSE	-33.366667	19.316667	2006-05-05	2005-11-06	2006-11-01	688210-99999	31.0819358380812	-33.617	19.467	17.3322945521699	5.05119148085574
ED3073	0.934359	D	1e-5	1e-5	1e-5	0.934359	1e-5	1e-5	1e-5	1e-5	1e-5	1e-5	FALSE	-1.083333	36.65	2006-05-17	2005-11-18	2006-11-13	637400-99999	40.4518041599832	-1.317	36.917	19.3304363063156	1.59859428922317
ED3077	0.75534	D	1e-5	1e-5	1e-5	0.75534	1e-5	1e-5	0.002367	1e-5	0.034257	1e-5	FALSE	-1.316667	36.8	2006-05-17	2005-11-18	2006-11-13	637400-99999	14.2474868577919	-1.317	36.917	19.3304363063156	1.59859428922317
EG4347	0.675313	D	1e-5	0.261096	0.063511	0.675313	1e-5	1e-5	1e-5	1e-5	1e-5	1e-5	FALSE	44.04789	-123.07108	2006-10-09	2006-04-12	2007-04-07	726930-24221	14.9464188519285	44.133	-123.214	11.0445681780408	6.46927695687192
EG4349	0.569544	K	1e-5	1e-5	1e-5	0.222824	1e-5	1e-5	0.014195	1e-5	0.193368	0.569544	FALSE	40.771467	-111.87316	2006-10-02	2006-04-05	2007-03-31	725720-24127	8.12336749073853	40.787	-111.968	11.8203134642198	11.2732147325458
EG4724	0.64855	J	1e-5	0.020153	1e-5	0.20714	1e-5	1e-5	1e-5	1e-5	0.124086	1e-5	FALSE	41.6288	-8.3476	2007-03-28	2006-09-29	2007-09-24	601010-99999	688.364608564611	35.733	-5.9	18.0386609513897	4.99759820345611
EG4725	0.593241	J	1e-5	1e-5	1e-5	0.124487	1e-5	1e-5	0.282191	1e-5	1e-5	1e-5	FALSE	41.6288	-8.3476	2007-03-28	2006-09-29	2007-09-24	601010-99999	688.364608564611	35.733	-5.9	18.0386609513897	4.99759820345611
EG4946	0.569549	D	1e-5	0.024101	0.406269	0.569549	1e-5	1e-5	1e-5	1.1e-5	1e-5	1e-5	FALSE	40.72596	-111.82184	2007-09-27	2007-03-31	2008-03-25	725720-24127	13.7055715575985	40.787	-111.968	12.0723999245363	11.7290263317808
GXW1	0.909434	D	1e-5	1e-5	1e-5	0.909434	1e-5	1e-5	1e-5	1e-5	1e-5	1e-5	FALSE	30.542889	114.419828	2010-11-05	2010-05-09	2011-05-04	574940-99999	33.5656641785306	30.6	114.05	17.0089733408829	9.54503445688711
JT11398	0.690335	D	1e-5	0.160151	1e-5	0.690335	1e-5	1e-5	1e-5	1e-5	0.110807	1e-5	FALSE	47.763944	-122.275484	2003-12-01	2003-06-04	2004-05-29	727937-99999	15.1381274783418	47.9	-122.283	10.8462473946656	5.41877742863802
JU1088	0.78102	D	1e-5	1e-5	1e-5	0.78102	1e-5	1e-5	1e-5	1e-5	1e-5	1e-5	FALSE	34.7613	138.0149	2007-03-14	2006-09-15	2007-09-10	476550-99999	25.7527459452944	34.6	138.217	16.9495333344376	6.57787338131322
JU1172	0.765549	C	1e-5	1e-5	0.765549	0.234361	1e-5	1e-5	1e-5	1e-5	1e-5	1e-5	FALSE	-36.87	-73.04	2007-04-01	2006-10-03	2007-09-28	856820-99999	10.9583527745891	-36.767	-73.067	12.063180060341	3.7266439296317
JU1200	0.682998	B	1e-5	0.682998	1e-5	0.316912	1e-5	1e-5	1e-5	1e-5	1e-5	1e-5	FALSE	55.577	-4.6	2007-08-01	2007-02-02	2008-01-28	NA	NA	NA	NA	NA	NA
JU1212	0.725328	B	0.08567	0.725328	1e-5	1e-5	1.1e-5	1e-5	1e-5	1e-5	0.188922	1e-5	FALSE	48.71	-3.81	2007-09-24	2007-03-28	2008-03-22	NA	NA	NA	NA	NA	NA
JU1213	0.9999	I	1e-5	1e-5	1e-5	1e-5	1e-5	1e-5	1e-5	1e-5	0.9999	1e-5	FALSE	48.71	-3.81	2007-09-24	2007-03-28	2008-03-22	NA	NA	NA	NA	NA	NA
JU1242	0.9999	I	1e-5	1e-5	1e-5	1e-5	1e-5	1e-5	1e-5	1e-5	0.9999	1e-5	FALSE	49.1269	1.9595	2007-10-14	2007-04-17	2008-04-11	106070-99999	355.150966843407	49.983	6.7	9.16760917946604	6.52039228129181
JU1246	0.749686	I	1e-5	0.250224	1e-5	1e-5	1e-5	1e-5	1e-5	1e-5	0.749686	1e-5	FALSE	49.12618	1.96152	2007-10-14	2007-04-17	2008-04-11	106070-99999	355.033730554196	49.983	6.7	9.16760917946604	6.52039228129181
JU1249	0.9999	B	1e-5	0.9999	1e-5	1e-5	1e-5	1e-5	1e-5	1e-5	1e-5	1e-5	FALSE	49.126	1.951	2007-10-14	2007-04-17	2008-04-11	106070-99999	355.773278813213	49.983	6.7	9.16760917946604	6.52039228129181
JU1395	0.746648	D	1e-5	0.25326	1e-5	0.746648	1e-5	1e-5	1e-5	1.2e-5	1e-5	1e-5	FALSE	47.2199	0.04619	2008-03-01	2007-09-03	2008-08-28	106070-99999	577.68641455356	49.983	6.7	9.20932015964048	6.74719144807442
JU1400	0.38002	J	1e-5	1e-5	1e-5	0.204082	1e-5	1e-5	0.045369	1e-5	0.370459	1e-5	FALSE	37.3845	-5.988	2008-03-29	2007-10-01	2008-09-25	601010-99999	184.041493052178	35.733	-5.9	18.201119443169	4.39297732670265
JU1409	0.644812	D	1e-5	1e-5	1e-5	0.644812	1e-5	1e-5	1e-5	1e-5	0.152121	1e-5	FALSE	37.468	-5.637	2008-03-31	2007-10-03	2008-09-27	601010-99999	194.816411383572	35.733	-5.9	18.2050081652214	4.39623950428144
JU1440	0.687095	D	1e-5	0.006749	1e-5	0.687095	1e-5	1e-5	1e-5	1e-5	0.18064	1e-5	FALSE	41.41307	2.15231	2008-06-09	2007-12-12	2008-12-06	165220-99999	514.657763690094	40.567	8.167	16.6059094104078	5.37913437660626
JU1491	0.635893	J	1e-5	1e-5	1e-5	1e-5	1e-5	1e-5	1e-5	1e-5	0.364017	1e-5	FALSE	46.63	1.06	2008-08-17	2008-02-19	2009-02-13	160590-99999	535.171573558491	45.217	7.65	12.5972167006339	7.6037552594035
JU1530	0.582604	I	1e-5	1e-5	1e-5	0.417306	1e-5	1e-5	1e-5	1e-5	0.582604	1e-5	FALSE	48.7015	2.1725	2008-09-09	2008-03-13	2009-03-08	106070-99999	357.599137125117	49.983	6.7	8.60911931766822	7.5421668937989
JU1543	0.65206	B	1e-5	0.65206	1e-5	0.34785	1e-5	1e-5	1e-5	1e-5	1e-5	1e-5	FALSE	48.7015	2.1725	2008-09-08	2008-03-12	2009-03-07	106070-99999	357.599137125117	49.983	6.7	8.61389895362917	7.54075112388336
JU1568	0.9999	B	1e-5	0.9999	1e-5	1e-5	1e-5	1e-5	1e-5	1e-5	1e-5	1e-5	FALSE	48.8092	2.3862	2008-10-05	2008-04-08	2009-04-03	106070-99999	338.329575954948	49.983	6.7	8.7504147614222	7.46187436719634
JU1580	0.9999	I	1e-5	1e-5	1e-5	1e-5	1e-5	1e-5	1e-5	1e-5	0.9999	1e-5	FALSE	48.7015	2.1725	2008-10-06	2008-04-09	2009-04-04	106070-99999	357.599137125117	49.983	6.7	8.78323307445055	7.44992511827695
JU1581	0.65758	I	0.067559	0.103112	1e-5	0.171678	1e-5	1e-5	1e-5	1e-5	0.65758	1e-5	FALSE	48.7015	2.1725	2008-10-23	2008-04-26	2009-04-21	106070-99999	357.599137125117	49.983	6.7	9.03395427478881	7.4921772621621
JU1586	0.861778	B	1e-5	0.861778	1e-5	0.138132	1e-5	1e-5	1e-5	1e-5	1e-5	1e-5	FALSE	46.63	1.06	2008-11-03	2008-05-07	2009-05-02	160590-99999	535.171573558491	45.217	7.65	12.5211400221458	7.70825937481373
JU1652	0.582993	D	1e-5	0.337599	1e-5	0.582993	1e-5	1e-5	0.079329	1e-5	1e-5	1e-5	FALSE	-34.86	-56.19	2009-01-01	2008-07-05	2009-06-30	865850-99999	1.43771090081113	-34.85	-56.2	18.5080517082179	5.39511943846877
JU1666	0.976914	I	1e-5	0.022996	1e-5	1e-5	1e-5	1e-5	1e-5	1e-5	0.976914	1e-5	FALSE	48.725018	-3.972104	2009-07-14	2009-01-15	2010-01-10	NA	NA	NA	NA	NA	NA
JU1792	0.689435	B	1e-5	0.689435	1e-5	1e-5	1e-5	1e-5	1e-5	1e-5	0.310475	1e-5	FALSE	46.63278	1.064289	2009-09-27	2009-03-31	2010-03-26	160590-99999	534.933597903959	45.217	7.65	12.6075064522338	8.8092334276543
JU1793	0.9999	I	1e-5	1e-5	1e-5	1e-5	1e-5	1e-5	1e-5	1e-5	0.9999	1e-5	FALSE	49.12604	1.95114	2009-10-10	2009-04-13	2010-04-08	106070-99999	355.762203288067	49.983	6.7	9.30557593760531	7.73411486928863
JU1808	0.685022	K	1e-5	0.135212	2e-5	1e-5	1e-5	1e-5	1e-5	1e-5	0.179676	0.685022	FALSE	48.81257	2.395372	2009-10-14	2009-04-17	2010-04-12	106070-99999	337.561594773839	49.983	6.7	9.23733908599878	7.71958972826928
JU1896	0.654548	B	0.031787	0.654548	1e-5	0.313585	1e-5	1e-5	1e-5	1e-5	1e-5	1e-5	FALSE	37.999722	23.749673	2010-01-02	2009-07-06	2010-07-01	167160-99999	13.1300990456781	37.9	23.733	18.9596814404432	6.27689321551353
JU1934	0.897654	I	1e-5	0.102256	1e-5	1e-5	1e-5	1e-5	1e-5	1e-5	0.897654	1e-5	FALSE	49.12604	1.95114	2009-10-25	2009-04-28	2010-04-23	106070-99999	355.762203288067	49.983	6.7	9.16229911722229	7.70603975657576
JU2001	0.524188	I	0.199819	0.025318	1e-5	1e-5	1e-5	1.7e-5	1e-5	1e-5	0.524188	1e-5	FALSE	-21.1	55.5	2010-09-01	2010-03-05	2011-02-28	619800-99999	23.6056188785858	-20.9	55.533	24.368088274549	2.10943282577023
JU2007	0.502314	D	0.018765	1e-5	1e-5	0.502314	1e-5	1e-5	1e-5	1e-5	0.182837	0.081678	FALSE	50.7608	-1.32413	2010-10-16	2010-04-19	2011-04-14	105000-99999	518.891517792203	50.967	6.05	10.4353512531788	7.24036006098239
JU2016	0.686517	C	1e-5	1e-5	0.686517	0.313393	1e-5	1e-5	1e-5	1e-5	1e-5	1e-5	FALSE	37.757593	-122.463177	2010-11-01	2010-05-05	2011-04-30	724940-23234	17.555779561903	37.62	-122.39	13.9290485980178	3.64422740936447
JU2017	0.40346	C	0.130618	0.068426	0.40346	0.272208	1e-5	1e-5	1e-5	1e-5	1e-5	0.039275	FALSE	37.757593	-122.463177	2010-11-01	2010-05-05	2011-04-30	724940-23234	17.555779561903	37.62	-122.39	13.9290485980178	3.64422740936447
JU2106	0.845197	I	0.0127	0.142023	1e-5	1e-5	1e-5	1e-5	1e-5	1e-5	0.845197	1e-5	FALSE	43.606266	0.239824	2011-07-10	2011-01-11	2012-01-06	162592-99999	600.359917039434	44.533	7.617	13.3916958729903	8.03589541266471
JU2131	0.831556	I	1e-5	0.034485	1e-5	1e-5	1e-5	1e-5	1e-5	1e-5	0.831556	1e-5	FALSE	48.0497	-4.705	2011-08-09	2011-02-10	2012-02-05	NA	NA	NA	NA	NA	NA
JU2141	0.780312	I	1e-5	0.219596	1e-5	1e-5	1.1e-5	1.1e-5	1e-5	1e-5	0.780312	1e-5	FALSE	46.6293	1.0512	2011-10-23	2011-04-26	2012-04-20	160590-99999	535.803002447377	45.217	7.65	13.2046221177115	8.43921752040678
JU2234	0.551605	B	1.58e-4	0.551605	1e-5	0.404098	1e-5	1e-5	0.044068	1e-5	1e-5	1e-5	FALSE	47.227	-1.583	2012-11-11	2012-05-15	2013-05-10	106070-99999	682.00182707148	49.983	6.7	8.63762357366486	7.42717262284876
JU2250	0.999892	I	1e-5	1e-5	1e-5	1e-5	1.8e-5	1e-5	1e-5	1e-5	0.999892	1e-5	FALSE	48.285278	-1.891389	2012-11-15	2012-05-19	2013-05-14	105000-99999	645.397534521277	50.967	6.05	10.6944433951843	7.36110133074393
JU2257	0.9999	B	1e-5	0.9999	1e-5	1e-5	1e-5	1e-5	1e-5	1e-5	1e-5	1e-5	FALSE	46.6	1.1	2013-08-15	2013-02-16	2014-02-11	160520-99999	514.013616460851	45.933	7.7	-5.35708594674514	6.20366261412325
JU2316	0.999899	G	1e-5	1e-5	1e-5	1e-5	1e-5	1e-5	0.999899	1e-5	1.1e-5	1e-5	FALSE	38.7175	-9.1486	2013-08-25	2013-02-26	2014-02-21	601010-99999	438.580888257426	35.733	-5.9	18.3770941213912	4.94358766031202
JU2464	0.626128	D	1e-5	1e-5	1e-5	0.626128	1e-5	1e-5	1e-5	1e-5	0.144591	1e-5	FALSE	-13.155	-72.525	2013-01-01	2012-07-05	2013-06-30	846860-99999	76.2023990278308	-13.533	-71.933	13.0475657565391	1.64385717246497
JU2466	0.9999	D	1e-5	1e-5	1e-5	0.9999	1e-5	1e-5	1e-5	1e-5	1e-5	1e-5	FALSE	-13.257	-72.266	2013-01-01	2012-07-05	2013-06-30	846860-99999	46.9803044100261	-13.533	-71.933	13.0475657565391	1.64385717246497
JU2478	0.377106	I	1e-5	1e-5	0.344298	0.278516	1e-5	1e-5	1e-5	1e-5	0.377106	1e-5	FALSE	50.85	4.351	2013-02-01	2012-08-05	2013-07-31	105000-99999	119.581806785905	50.967	6.05	10.5403060244091	7.42874745287096
JU2513	0.865712	D	1e-5	0.072771	1e-5	0.865712	1e-5	1e-5	1e-5	1e-5	0.020539	1e-5	FALSE	38.26016	22.0736	2013-05-07	2012-11-08	2013-11-03	166870-99999	58.000771618245	38.15	21.417	18.7918305709057	6.61980985654985
JU2519	0.713829	G	1e-5	1.7e-5	1e-5	1e-5	1e-5	1e-5	0.713829	1e-5	1e-5	1e-5	FALSE	38.7175	-9.1486	2013-08-25	2013-02-26	2014-02-21	601010-99999	438.580888257426	35.733	-5.9	18.3770941213912	4.94358766031202
JU2522	0.9999	J	1e-5	1e-5	1e-5	1e-5	1e-5	1e-5	1e-5	1e-5	1e-5	1e-5	FALSE	38.7175	-9.1486	2013-08-25	2013-02-26	2014-02-21	601010-99999	438.580888257426	35.733	-5.9	18.3770941213912	4.94358766031202
JU2526	0.999899	G	1.1e-5	1e-5	1e-5	1.1e-5	1e-5	1e-5	0.999899	1e-5	1e-5	1e-5	FALSE	38.7175	-9.1486	2013-08-25	2013-02-26	2014-02-21	601010-99999	438.580888257426	35.733	-5.9	18.3770941213912	4.94358766031202
JU2534	0.553552	D	1e-5	1e-5	1e-5	0.553552	1e-5	1e-5	1e-5	1e-5	0.446358	1e-5	FALSE	49.357921	0.097087	2013-06-09	2012-12-11	2013-12-06	105000-99999	460.547873563415	50.967	6.05	10.7110596307038	7.37465057125989
JU2565	0.9999	B	1e-5	0.9999	1e-5	1e-5	1e-5	1e-5	1e-5	1e-5	1e-5	1e-5	FALSE	44.958394	1.066213	2013-10-05	2013-04-08	2014-04-03	160595-99999	515.260786383126	45.083	7.6	14.8007415919505	7.67089276055613
JU2566	0.770245	B	1e-5	0.770245	1e-5	0.113902	1e-5	1e-5	1e-5	1e-5	0.115773	1e-5	FALSE	48.83886	2.44599	2013-10-02	2013-04-05	2014-03-31	106070-99999	332.977516340812	49.983	6.7	10.2616411701982	6.46868733856259
JU2570	0.999889	I	1.2e-5	1.1e-5	1e-5	1e-5	1e-5	1e-5	1e-5	1e-5	0.999889	1e-5	FALSE	46.2657	-0.2685	2013-11-13	2013-05-17	2014-05-12	160520-99999	617.008121785764	45.933	7.7	-4.77466545814999	5.57125260350209
JU2572	0.709448	B	1e-5	0.709448	1e-5	1e-5	1e-5	1e-5	1e-5	1e-5	0.290462	1e-5	FALSE	48.81257	2.395372	2013-10-01	2013-04-04	2014-03-30	106070-99999	337.561594773839	49.983	6.7	10.2253651899111	6.47111607938628
JU2575	0.83492	B	1e-5	0.83492	1.5e-5	1e-5	1e-5	1e-5	1e-5	1.3e-5	0.164982	1e-5	FALSE	49.0857	3.0707	2013-10-26	2013-04-29	2014-04-24	106070-99999	280.148316517026	49.983	6.7	10.3566002864415	6.39588154760046
JU2576	0.554878	I	0.091793	0.015965	1e-5	0.336444	1e-5	1e-5	1e-5	1e-5	0.554878	8.6e-4	FALSE	49.0861	3.072	2013-10-26	2013-04-29	2014-04-24	106070-99999	280.043607914244	49.983	6.7	10.3566002864415	6.39588154760046
JU2578	0.542414	J	1e-5	1e-5	1e-5	0.457496	1e-5	1e-5	1e-5	1e-5	1e-5	1e-5	FALSE	48.87613	2.4315	2013-10-27	2013-04-30	2014-04-25	106070-99999	332.299823314124	49.983	6.7	10.3790376123468	6.40610930426678
JU258	0.351847	G	0.132455	0.070774	1e-5	1e-5	1e-5	1e-5	0.351847	1e-5	0.097688	1e-5	FALSE	32.73	-16.89	2001-10-01	2001-04-04	2002-03-30	600050-99999	462.485603637417	28.61	-17.75	21.7291133033226	2.44071955600224
JU2581	0.9999	K	1e-5	1e-5	1e-5	1e-5	1e-5	1e-5	1e-5	1e-5	1e-5	0.9999	FALSE	46.6	1.1	2013-11-03	2013-05-07	2014-05-02	160520-99999	514.013616460851	45.933	7.7	-4.77349019989158	5.56586451504868
JU2586	0.655669	J	1e-5	1e-5	1e-5	0.154338	1e-5	1e-5	0.112716	1e-5	0.077208	1e-5	FALSE	48.897	2.159	2013-11-11	2013-05-15	2014-05-10	106070-99999	349.88941096322	49.973	6.693	10.3425231815547	6.3858128674729
JU2587	0.791614	K	1e-5	1e-5	1e-5	0.1127	1e-5	1e-5	1e-5	1e-5	0.095606	0.791614	FALSE	45.026713	3.872016	2013-11-10	2013-05-14	2014-05-09	160595-99999	293.935538672156	45.086	7.603	14.7774320031814	7.63908085281517
JU2592	0.816724	B	1e-5	0.816724	1e-5	1e-5	1e-5	1e-5	0.022935	1e-5	0.091148	1e-5	FALSE	48.628558	-2.403836	2013-11-11	2013-05-15	2014-05-10	105000-99999	660.633022321773	50.961	6.042	12.1876677691621	5.70629599081742
JU2593	0.9999	K	1e-5	1e-5	1e-5	1e-5	1e-5	1e-5	1e-5	1e-5	1e-5	0.9999	FALSE	48.822556	2.222334	2013-01-01	2012-07-05	2013-06-30	106070-99999	348.756893446321	49.983	6.7	8.36359267780633	7.31685342457247
JU2600	0.997591	I	1e-5	1e-5	1e-5	0.002319	1e-5	1e-5	1e-5	1e-5	0.997591	1e-5	FALSE	49.1242	1.9496	2013-11-20	2013-05-24	2014-05-19	106070-99999	355.929978032997	49.973	6.693	10.3742887793002	6.40908886948819
JU2610	0.996153	I	1e-5	1e-5	1e-5	0.003757	1e-5	1e-5	1e-5	1e-5	0.996153	1e-5	FALSE	49.1075	1.7915	2013-11-20	2013-05-24	2014-05-19	106070-99999	367.507326571302	49.973	6.693	10.3742887793002	6.40908886948819
JU2619	0.674056	D	1e-5	1e-5	0.177774	0.674056	1e-5	1e-5	1e-5	1e-5	1e-5	1e-5	FALSE	32.998352	-117.275428	2014-01-01	2013-07-05	2014-06-30	722927-3177	14.3825557414991	33.128	-117.279	17.298070051787	3.44532484017552
JU2800	0.467065	B	1e-5	0.467065	1e-5	0.159944	1e-5	1e-5	1e-5	1e-5	0.372911	1e-5	FALSE	48.79	2.331	2014-09-01	2014-03-05	2015-02-28	106070-99999	342.903504533946	49.973	6.693	9.95078290477333	6.5620091867664
JU2811	0.454041	D	0.192454	1e-5	0.017396	0.454041	1e-5	1e-5	0.164015	1.4e-5	1e-5	1e-5	FALSE	-33.8632	151.219453	2014-09-24	2014-03-28	2015-03-23	947680-99999	2.32041843179816	-33.85	151.2	18.6566774395964	4.08962155370903
JU2825	0.9999	B	1e-5	0.9999	1e-5	1e-5	1e-5	1e-5	1e-5	1e-5	1e-5	1e-5	FALSE	48.8092	2.3862	2014-11-14	2014-05-18	2015-05-13	106070-99999	338.329575954948	49.973	6.693	9.50148087756388	6.86643051688946
JU2829	0.9999	K	1e-5	1e-5	1e-5	1e-5	1e-5	1e-5	1e-5	1e-5	1e-5	0.9999	FALSE	46.632	1.064	2010-10-03	2010-04-06	2011-04-01	160590-99999	534.932671778443	45.217	7.65	12.5397034367802	7.91116515294406
JU2838	0.547199	J	0.072467	1e-5	0.048379	1e-5	1e-5	1e-5	1e-5	1e-5	1e-5	0.331886	FALSE	20.205961	-97.98832	2015-01-01	2014-07-05	2015-06-30	766340-99999	41.8662706292529	20.083	-98.367	15.4702140064237	2.81749235826863
JU2841	0.605505	D	0.091283	1e-5	1e-5	0.605505	1e-5	1e-5	1e-5	1e-5	0.303132	1e-5	FALSE	-40	176	2015-03-01	2014-09-02	2015-08-28	934040-99999	48.9927979481308	-40.317	175.6	13.3943961818962	4.22592305285003
JU2853	0.379173	D	1e-5	0.254208	1e-5	0.379173	1e-5	1e-5	1e-5	1e-5	1e-5	1e-5	FALSE	41.19	-7.545	2015-05-01	2014-11-02	2015-10-28	603200-99999	615.756137399577	35.917	-5.35	19.5295092674751	4.86409409731118
JU2862	0.426445	C	1e-5	0.003358	0.426445	0.334683	1e-5	1e-5	0.030298	1e-5	0.135274	1e-5	FALSE	52.1944	0.1264	2015-06-06	2014-12-08	2015-12-03	100001-99999	419.162210559949	51.602	6.142	11.5756211422234	6.558220342775
JU2866	0.9999	C	1e-5	1e-5	0.9999	1e-5	1e-5	1e-5	1e-5	1e-5	1e-5	1e-5	FALSE	34.0751	-118.4409	2015-06-28	2014-12-30	2015-12-25	722885-93197	6.62156392352685	34.016	-118.451	18.3980912873499	3.62819298019829
JU2878	0.617716	D	1e-5	1e-5	0.18473	0.617716	1e-5	1e-5	1e-5	1e-5	1e-5	1e-5	FALSE	19.29732	-99.098769	2015-07-02	2015-01-03	2015-12-29	766810-99999	9.1165629015151	19.317	-99.183	17.9978137860082	3.17968566173222
JU2879	0.416813	K	1e-5	1e-5	0.298322	0.076059	0.208736	1e-5	1e-5	1e-5	1e-5	0.416813	FALSE	19.29732	-99.098769	2015-07-02	2015-01-03	2015-12-29	766810-99999	9.1165629015151	19.317	-99.183	17.9978137860082	3.17968566173222
JU2906	0.520081	D	1e-5	0.215485	1e-5	0.520081	1e-5	1e-5	1e-5	1e-5	0.264353	1e-5	FALSE	43.8023	11.2806	2015-12-13	2015-06-16	2016-06-10	161700-99999	6.14316062289376	43.81	11.205	15.8181230476786	7.09209833287504
JU2907	0.520035	B	1e-5	0.520035	1e-5	0.479872	1e-5	1e-5	1.3e-5	1e-5	1e-5	1e-5	FALSE	43.8021	11.2906	2015-12-13	2015-06-16	2016-06-10	161700-99999	6.9436778996793604	43.81	11.205	15.8181230476786	7.09209833287504
JU310	0.587041	I	1e-5	1e-5	1e-5	0.412869	1e-5	1e-5	1e-5	1e-5	0.587041	1e-5	FALSE	46.63	1.06	2002-08-25	2002-02-26	2003-02-21	996570-99999	426.464149195698	50.4	0	12.4190779351771	4.62392679970346
JU311	0.782558	B	1e-5	0.782558	1e-5	0.065245	1e-5	1e-5	1e-5	1e-5	0.140303	0.011824	FALSE	44.42	4.4	2002-09-08	2002-03-12	2003-03-07	160590-99999	271.326198756229	45.21	7.64	12.0824908800771	7.51109844951843
JU3125	0.456677	J	1e-5	0.159879	1e-5	0.383364	1e-5	1e-5	1e-5	1e-5	1e-5	1e-5	FALSE	38.1127	13.3722	2016-04-20	2015-10-23	2016-10-17	164050-99999	25.6318138100173	38.176	13.091	19.0647471041368	4.88412763868154
JU3127	0.60954	J	1e-5	0.18184	1e-5	0.208539	1e-5	1e-5	1e-5	1e-5	1e-5	1e-5	FALSE	38.11196	13.37274	2016-04-20	2015-10-23	2016-10-17	164050-99999	25.7000576259404	38.176	13.091	19.0647471041368	4.88412763868154
JU3128	0.758862	D	1e-5	0.002708	1e-5	0.758862	1e-5	1e-5	0.012627	1e-5	0.225733	1e-5	FALSE	37.076	15.2763	2016-04-23	2015-10-26	2016-10-20	164800-99999	45.4459374606772	36.683	15.133	19.104857150217	4.95727538714437
JU3132	0.9999	I	1e-5	1e-5	1e-5	1e-5	1e-5	1e-5	1e-5	1e-5	0.9999	1e-5	FALSE	48.7015	2.1725	2011-10-10	2011-04-13	2012-04-07	106070-99999	357.599137125117	49.983	6.7	9.73372486672664	7.03726032861227
JU3134	0.76489	D	1e-5	0.016018	1e-5	0.76489	1e-5	1e-5	1e-5	1e-5	0.133263	1e-5	FALSE	48.7015	2.1725	2011-11-11	2011-05-15	2012-05-09	106070-99999	357.599137125117	49.983	6.7	9.31358722646515	6.94123901609504
JU3135	0.999892	D	1.6e-5	1.2e-5	1e-5	0.999892	1e-5	1e-5	1e-5	1e-5	1e-5	1e-5	FALSE	48.7015	2.1725	2013-10-29	2013-05-02	2014-04-27	106070-99999	357.599137125117	49.973	6.693	10.3890879886797	6.40509310429691
JU3137	0.41168	J	1e-5	0.162265	1e-5	0.090919	0.044108	1e-5	1e-5	1e-5	0.290968	1e-5	FALSE	48.7015	2.1725	2014-10-20	2014-04-23	2015-04-18	106070-99999	357.599137125117	49.973	6.693	9.48893390877455	6.74231579028755
JU3140	0.999887	I	1.1e-5	1.4e-5	1e-5	1.1e-5	1e-5	1e-5	1e-5	1e-5	0.999887	1e-5	FALSE	48.71	-3.81	2009-08-09	2009-02-10	2010-02-05	105000-99999	750.970243184268	50.967	6.05	11.1668849538135	7.08317820059378
JU3144	0.366712	K	1e-5	1e-5	1e-5	0.322822	1e-5	1e-5	1e-5	1e-5	0.109345	0.366712	FALSE	6.18	10.52	2016-05-01	2015-11-03	2016-10-28	649100-99999	256.287801271654	4.006	9.719	27.4007673021169	1.36393636529977
JU323	0.430619	I	1e-5	1e-5	1e-5	0.372107	1e-5	1e-5	1e-5	1e-5	0.430619	1e-5	FALSE	44.42	4.4	2002-09-08	2002-03-12	2003-03-07	160590-99999	271.326198756229	45.21	7.64	12.0824908800771	7.51109844951843
JU346	0.507458	D	1e-5	1e-5	1e-5	0.507458	1e-5	1e-5	1e-5	1e-5	0.492452	1e-5	FALSE	44.42	4.4	2002-09-08	2002-03-12	2003-03-07	160590-99999	271.326198756229	45.21	7.64	12.0824908800771	7.51109844951843
JU360	0.549732	K	1e-5	1e-5	1e-5	0.386084	1e-5	1e-5	1e-5	1e-5	0.064104	0.549732	FALSE	48.98	2.23	2002-09-16	2002-03-20	2003-03-15	996570-99999	225.447097037414	50.4	0	12.3957201000522	4.63758628174416
JU367	0.945253	B	1e-5	0.945253	1e-5	0.054657	1e-5	1e-5	1e-5	1e-5	1e-5	1e-5	FALSE	48.98	2.23	2002-09-16	2002-03-20	2003-03-15	996570-99999	225.447097037414	50.4	0	12.3957201000522	4.63758628174416
JU393	0.840683	I	1e-5	0.159227	1e-5	1e-5	1e-5	1e-5	1e-5	1e-5	0.840683	1e-5	FALSE	49.28	-0.32	2002-09-01	2002-03-05	2003-02-28	996570-99999	126.681592951608	50.4	0	12.434720176397	4.60721176735005
JU394	0.9999	B	1e-5	0.9999	1e-5	1e-5	1e-5	1e-5	1e-5	1e-5	1e-5	1e-5	FALSE	49.28	-0.32	2002-09-01	2002-03-05	2003-02-28	996570-99999	126.681592951608	50.4	0	12.434720176397	4.60721176735005
JU397	0.7884	I	1e-5	0.211507	1e-5	1e-5	1.4e-5	1e-5	1e-5	1e-5	0.7884	1e-5	FALSE	49.28	-0.32	2002-09-01	2002-03-05	2003-02-28	996570-99999	126.681592951608	50.4	0	12.434720176397	4.60721176735005
JU406	0.9999	B	1e-5	0.9999	1e-5	1e-5	1e-5	1e-5	1e-5	1e-5	1e-5	1e-5	FALSE	49.28	-0.32	2002-12-30	2002-07-03	2003-06-28	996570-99999	126.681592951608	50.4	0	11.6665325627993	3.87939385884874
JU440	0.648635	B	1e-5	0.648635	1e-5	0.205326	1e-5	1e-5	1e-5	1e-5	0.145959	1e-5	FALSE	48.715	1.56	2003-09-12	2003-03-16	2004-03-10	996570-99999	218.758679604599	50.4	0	11.8753115917063	4.02033456449737
JU561	0.785725	D	1e-5	0.194369	1e-5	0.785725	1e-5	1e-5	1e-5	1e-5	0.019826	1e-5	FALSE	48.71	-3.81	2004-10-03	2004-04-06	2005-04-01	NA	NA	NA	NA	NA	NA
JU642	0.505091	D	1e-5	1e-5	1e-5	0.505091	1e-5	1e-5	1e-5	1e-5	0.264312	1e-5	FALSE	48.84	2.5	2004-12-14	2004-06-17	2005-06-12	106070-99999	329.3031783873	49.983	6.7	9.59575644126701	7.51345667643505
JU751	0.99253	K	1e-5	1e-5	1e-5	0.00738	1e-5	1e-5	1e-5	1e-5	1e-5	0.99253	FALSE	48.84	2.5	2005-06-08	2004-12-10	2005-12-05	106070-99999	329.3031783873	49.983	6.7	10.2340643481425	7.81900932700997
JU774	0.653356	J	1e-5	1e-5	1e-5	0.288859	0.057705	1e-5	1e-5	1e-5	1e-5	1e-5	FALSE	38.683	-9.34	2005-07-10	2005-01-11	2006-01-06	601010-99999	447.094507121933	35.733	-5.9	18.1458372604044	5.5541689084719
JU775	0.9999	G	1e-5	1e-5	1e-5	1e-5	1e-5	1e-5	0.9999	1e-5	1e-5	1e-5	FALSE	38.7175	-9.1486	2005-07-10	2005-01-11	2006-01-06	601010-99999	438.580888257426	35.733	-5.9	18.1458372604044	5.5541689084719
JU778	0.912188	J	1e-5	1e-5	1e-5	1e-5	0.055318	1e-5	0.032413	1e-5	1e-5	1e-5	FALSE	38.719	-9.1491	2005-07-10	2005-01-11	2006-01-06	601010-99999	438.733982864614	35.733	-5.9	18.1458372604044	5.5541689084719
JU782	0.66968	G	1e-5	1e-5	1e-5	0.026341	1e-5	1e-5	0.66968	1e-5	1e-5	1e-5	FALSE	38.7191	-9.1503	2005-07-10	2005-01-11	2006-01-06	601010-99999	438.811838670158	35.733	-5.9	18.1458372604044	5.5541689084719
JU792	0.999897	I	1e-5	1e-5	1e-5	1e-5	1.3e-5	1e-5	1e-5	1e-5	0.999897	1e-5	FALSE	43.06	0.24	2005-08-31	2005-03-04	2006-02-27	162592-99999	616.407966442898	44.533	7.617	12.0823279783799	8.64082755556314
JU830	0.506807	K	1e-5	1.7e-5	1e-5	0.42004	1e-5	1.3e-5	1.6e-5	1e-5	1e-5	0.506807	FALSE	48.52	9.05	2005-09-28	2005-04-01	2006-03-27	107380-99999	22.7657046574556	48.683	9.217	9.26137494211211	8.292840176524
JU847	0.566412	I	1e-5	0.165206	1e-5	0.267768	1e-5	1e-5	1e-5	1e-5	0.566412	1e-5	FALSE	48.46	7.461	2005-10-03	2005-04-06	2006-04-01	108050-99999	28.9906985364631	48.367	7.833	10.5366006777417	8.27752404630214
KR314	0.6276	D	1e-5	1e-5	0.066172	0.6276	1e-5	1e-5	1e-5	1e-5	0.02339	0.15611	FALSE	49.28	-123.13	1984-05-01	1983-11-03	1984-10-28	712010-99999	1.00298179941378	49.3	-123.117	10.9913561661484	5.33707956608012
LKC34	0.9999	J	1e-5	1e-5	1e-5	1e-5	1e-5	1e-5	1e-5	1e-5	1e-5	1e-5	FALSE	-18	46	2005-06-17	2004-12-19	2005-12-14	670830-99999	179.455197485806	-18.8	47.483	18.6073923166225	3.0708609670726
LSJ1	0.9999	B	1e-5	0.9999	1e-5	1e-5	1e-5	1e-5	1e-5	1e-5	1e-5	1e-5	FALSE	51.45	-2.59	2051-01-01	2018-06-10	2019-06-05	NA	NA	NA	NA	NA	NA
MY1	0.632621	J	1e-5	1e-5	1e-5	0.33299	1e-5	1e-5	1e-5	1e-5	1e-5	0.03431	FALSE	52.54	7.31	2002-07-01	2002-01-02	2002-12-28	103040-99999	19.702131650041	52.71	7.31	10.7507571530096	6.7985956090581
MY10	0.624069	D	1e-5	1e-5	1e-5	0.624069	1e-5	1e-5	0.302755	1e-5	0.036305	1e-5	FALSE	51.96	7.53	2002-07-01	2002-01-02	2002-12-28	103060-99999	38.1101052733109	52.3	7.37	10.6382812315103	6.37701443716211
MY16	0.879196	K	1e-5	1e-5	1e-5	1e-5	0.120714	1e-5	1e-5	1e-5	1e-5	0.879196	FALSE	51.93	7.57	2002-07-01	2002-01-02	2002-12-28	103060-99999	42.0792818429715	52.3	7.37	10.6382812315103	6.37701443716211
MY18	0.9999	K	1e-5	1e-5	1e-5	1e-5	1e-5	1e-5	1e-5	1e-5	1e-5	0.9999	FALSE	51.96	7.53	2002-07-01	2002-01-02	2002-12-28	103060-99999	38.1101052733109	52.3	7.37	10.6382812315103	6.37701443716211
MY2147	0.490751	B	1e-5	0.490751	1e-5	0.096592	1e-5	1e-5	1e-5	1e-5	0.412577	1e-5	FALSE	54.346355	10.117737	2012-09-17	2012-03-21	2013-03-16	100380-99999	37.9094059789089	54.317	9.533	8.33532427035736	6.90545805083018
MY2212	0.730147	D	1e-5	1e-5	1e-5	0.730147	1e-5	1e-5	1e-5	1e-5	0.122791	0.146982	FALSE	54.346355	10.117737	2012-09-26	2012-03-30	2013-03-25	100380-99999	37.9094059789089	54.317	9.533	8.11582615156166	7.06984500233081
MY23	0.510437	E	1e-5	1e-5	1e-5	1e-5	0.510437	1e-5	1e-5	1e-5	1e-5	0.489473	FALSE	51.96	7.53	2002-07-01	2002-01-02	2002-12-28	103060-99999	38.1101052733109	52.3	7.37	10.6382812315103	6.37701443716211
MY2453	0.509916	B	1e-5	0.509916	1e-5	0.10959	1e-5	1e-5	1e-5	1e-5	0.235805	0.057793	FALSE	51.950777	7.536628	2012-11-07	2012-05-11	2013-05-06	103150-99999	22.8868816028619	52.133	7.7	9.44384789356663	7.41258431323179
MY2530	0.780637	D	1e-5	1e-5	1e-5	0.780637	1e-5	1e-5	1e-5	1e-5	0.179515	1e-5	FALSE	54.346355	10.117737	2012-12-05	2012-06-08	2013-06-03	100380-99999	37.9094059789089	54.317	9.533	7.99015395397532	7.11779032194931
MY2535	0.756458	D	1e-5	1e-5	1e-5	0.756458	1e-5	1e-5	1e-5	1e-5	0.072714	1e-5	FALSE	51.950723000000004	7.599099	2012-12-05	2012-06-08	2013-06-03	103150-99999	21.3344396654372	52.133	7.7	9.20907721126176	7.18570347169289
MY2573	0.659791	I	1e-5	0.340119	1e-5	1e-5	1e-5	1e-5	1e-5	1e-5	0.659791	1e-5	FALSE	51.950723000000004	7.599099	2012-12-10	2012-06-13	2013-06-08	103150-99999	21.3344396654372	52.133	7.7	9.23878070431691	7.21646818691979
MY2585	0.999897	D	1e-5	1e-5	1e-5	0.999897	1e-5	1e-5	1.3e-5	1e-5	1e-5	1e-5	FALSE	54.346355	10.117737	2012-12-10	2012-06-13	2013-06-08	100380-99999	37.9094059789089	54.317	9.533	8.00777796350746	7.13399252735383
MY2693	0.960228	D	1e-5	1e-5	1e-5	0.960228	1e-5	1e-5	1e-5	1e-5	1e-5	0.039682	FALSE	54.3491	10.11505	2013-08-15	2013-02-16	2014-02-11	100380-99999	37.7664386374409	54.317	9.533	9.01356752516997	6.71792397956208
MY2713	0.999899	D	1e-5	1e-5	1e-5	0.999899	1e-5	1e-5	1.1e-5	1e-5	1e-5	1e-5	FALSE	54.3491	10.11505	2013-09-03	2013-03-07	2014-03-02	100380-99999	37.7664386374409	54.317	9.533	9.26013386423646	6.49510514520432
MY2741	0.666187	K	1e-5	1e-5	1e-5	0.333723	1e-5	1e-5	1e-5	1e-5	1e-5	0.666187	FALSE	54.3491	10.11505	2014-09-01	2014-03-05	2015-02-28	100465-99999	3.95226571484106	54.38	10.145	11.3851221617204	6.80996196315274
MY518	0.452711	K	1e-5	1e-5	0.412856	0.069194	1e-5	1e-5	1e-5	1e-5	1e-5	0.452711	FALSE	51.964154	7.611719	2011-07-08	2011-01-09	2012-01-04	103150-99999	19.6632469954755	52.133	7.7	10.9290076639306	6.29826513751944
MY679	0.809122	D	1e-5	1e-5	1e-5	0.809122	1e-5	1e-5	1e-5	1e-5	1e-5	1e-5	FALSE	54.346355	10.117737	2011-09-27	2011-03-31	2012-03-25	100465-99999	4.14322686368797	54.367	10.133	9.93731936800871	6.21884855765571
MY772	0.707546	I	1e-5	0.007009	1e-5	0.285364	1e-5	1e-5	1e-5	1e-5	0.707546	1e-5	FALSE	54.346355	10.117737	2011-09-27	2011-03-31	2012-03-25	100465-99999	4.14322686368797	54.367	10.133	9.93731936800871	6.21884855765571
MY795	0.97746	K	1e-5	0.02245	1e-5	1e-5	1e-5	1e-5	1e-5	1e-5	1e-5	0.97746	FALSE	54.346355	10.117737	2011-10-26	2011-04-29	2012-04-23	100465-99999	4.14322686368797	54.367	10.133	9.58229770422957	6.29070929032271
MY920	0.804639	D	1e-5	1e-5	1e-5	0.804639	1e-5	1e-5	1e-5	1e-5	0.195271	1e-5	FALSE	54.346355	10.117737	2012-01-18	2011-07-22	2012-07-16	100465-99999	4.14322686368797	54.367	10.133	9.27755636597614	6.05694615818584
N2	0.9999	B	1e-5	0.9999	1e-5	1e-5	1e-5	1e-5	1e-5	1e-5	1e-5	1e-5	FALSE	51.45	-2.59	2051-01-01	2018-06-10	2019-06-05	NA	NA	NA	NA	NA	NA
NIC1	0.537592	D	1e-5	1e-5	1e-5	0.537592	1e-5	1e-5	1e-5	1e-5	0.391043	1e-5	FALSE	43.279	5.3543	2008-09-14	2008-03-18	2009-03-13	161150-99999	224.535484101111	44.25	7.8	12.5488978357746	7.94610657074629
NIC1049	0.593461	I	1e-5	0.381514	1e-5	0.024945	1e-5	1e-5	1e-5	1e-5	0.593461	1e-5	FALSE	43.593561	1.45032	2014-10-14	2014-04-17	2015-04-12	162592-99999	505.588654709479	44.547	7.623	13.0354664721118	7.09958941225319
NIC1107	0.794023	B	1e-5	0.794023	1.2e-5	1e-5	1e-5	1e-5	1e-5	1e-5	0.205885	1e-5	FALSE	43.716278	7.266935	2014-11-25	2014-05-29	2015-05-24	161150-99999	73.1150409490653	44.25	7.8	13.6554406975139	7.15550156515025
NIC166	0.375155	I	1e-5	0.042248	1e-5	0.351926	1e-5	1e-5	1e-5	1e-5	0.375155	1e-5	FALSE	46.72722	6.89775	2007-07-27	2007-01-28	2008-01-23	160540-99999	115.88867116207	45.733	7.35	10.2989955702045	8.1420703938284
NIC195	0.314001	J	0.240886	0.129079	1e-5	0.01215	1e-5	1e-5	0.274649	1e-5	0.029185	1e-5	FALSE	38.545874	-28.37322	2011-08-22	2011-02-23	2012-02-18	NA	NA	NA	NA	NA	NA
NIC199	0.467578	G	0.133143	1e-5	1e-5	1e-5	1e-5	1e-5	0.467578	1e-5	0.27033	1e-5	FALSE	37.745428	-25.19929	2011-03-09	2010-09-10	2011-09-05	600050-99999	1225.67378871482	28.617	-17.75	21.6458503045547	2.32653935454589
NIC2	0.574788	D	1e-5	0.425122	1e-5	0.574788	1e-5	1e-5	1e-5	1e-5	1e-5	1e-5	FALSE	43.279	5.3543	2008-09-14	2008-03-18	2009-03-13	161150-99999	224.535484101111	44.25	7.8	12.5488978357746	7.94610657074629
NIC207	0.670979	D	1e-5	0.046455	1e-5	0.670979	1e-5	1.1e-5	1e-5	1e-5	0.201677	1e-5	FALSE	43.720505	7.24045	2011-09-21	2011-03-25	2012-03-19	161150-99999	74.0029875816355	44.25	7.8	14.019505148591	8.29039644169109
NIC231	0.760836	D	1e-5	1e-5	1e-5	0.760836	0.045083	1e-5	1e-5	1e-5	1e-5	1e-5	FALSE	43.720505	7.24045	2011-11-14	2011-05-18	2012-05-12	161150-99999	74.0029875816355	44.25	7.8	13.6953163263767	8.35062065259986
NIC236	0.954727	J	1e-5	1e-5	1e-5	1e-5	1e-5	1e-5	1e-5	1e-5	0.045183	1e-5	FALSE	39.242006	-9.313417	2011-11-26	2011-05-30	2012-05-24	601010-99999	492.280625344724	35.733	-5.9	17.9062442462412	5.62010166556756
NIC242	0.438872	B	1e-5	0.438872	1e-5	0.044505	1e-5	1e-5	1e-5	1e-5	0.205607	1e-5	FALSE	38.691765	-9.31609	2008-08-17	2008-02-19	2009-02-13	601010-99999	446.360403473144	35.733	-5.9	17.7347242863938	4.7970444887321
NIC251	0.699168	G	0.253162	0.04759	1e-5	1e-5	1e-5	1e-5	0.699168	1e-5	1e-5	1e-5	FALSE	38.66621	-28.151364	2012-08-01	2012-02-03	2013-01-28	NA	NA	NA	NA	NA	NA
NIC252	0.931756	J	0.068154	1e-5	1e-5	1e-5	1e-5	1e-5	1e-5	1e-5	1e-5	1e-5	FALSE	38.661313	-28.147949	2012-08-01	2012-02-03	2013-01-28	NA	NA	NA	NA	NA	NA
NIC255	0.679449	D	1e-5	0.207636	1e-5	0.679449	1e-5	1e-5	1e-5	1e-5	0.112835	1e-5	FALSE	43.714834	7.266779	2012-11-18	2012-05-22	2013-05-17	161150-99999	73.2528399506264	44.25	7.8	13.5722198690713	8.16726696419157
NIC256	0.641916	G	1e-5	1e-5	1e-5	1e-5	1e-5	1e-5	0.641916	1e-5	1e-5	1e-5	FALSE	38.71829	-9.14875	2012-12-02	2012-06-05	2013-05-31	601010-99999	438.654944817739	35.733	-5.9	17.8446614997235	4.91703679109771
NIC258	0.999897	G	1e-5	1e-5	1e-5	1e-5	1e-5	1e-5	0.999897	1e-5	1.3e-5	1e-5	FALSE	38.71829	-9.14875	2012-12-02	2012-06-05	2013-05-31	601010-99999	438.654944817739	35.733	-5.9	17.8446614997235	4.91703679109771
NIC259	0.537535	J	1e-5	0.12168	1e-5	1e-5	1e-5	1e-5	0.175711	1e-5	0.165003	1e-5	FALSE	38.71829	-9.14875	2012-12-02	2012-06-05	2013-05-31	601010-99999	438.654944817739	35.733	-5.9	17.8446614997235	4.91703679109771
NIC260	0.701671	G	1e-5	1e-5	1e-5	0.066757	1.5e-5	1e-5	0.701671	1e-5	1e-5	1e-5	FALSE	38.71829	-9.14875	2012-12-02	2012-06-05	2013-05-31	601010-99999	438.654944817739	35.733	-5.9	17.8446614997235	4.91703679109771
NIC261	0.9999	G	1e-5	1e-5	1e-5	1e-5	1e-5	1e-5	0.9999	1e-5	1e-5	1e-5	FALSE	38.71829	-9.14875	2012-12-02	2012-06-05	2013-05-31	601010-99999	438.654944817739	35.733	-5.9	17.8446614997235	4.91703679109771
NIC262	0.871335	G	1e-5	1e-5	1e-5	1e-5	1e-5	1e-5	0.871335	1e-5	1e-5	1e-5	FALSE	38.71829	-9.14875	2012-12-02	2012-06-05	2013-05-31	601010-99999	438.654944817739	35.733	-5.9	17.8446614997235	4.91703679109771
NIC265	0.999899	G	1e-5	1e-5	1e-5	1.1e-5	1e-5	1e-5	0.999899	1e-5	1e-5	1e-5	FALSE	38.71829	-9.14875	2012-12-02	2012-06-05	2013-05-31	601010-99999	438.654944817739	35.733	-5.9	17.8446614997235	4.91703679109771
NIC266	0.671094	J	0.028665	0.252131	1e-5	1e-5	1e-5	1e-5	0.04804	1e-5	1e-5	1e-5	FALSE	38.69237	-9.31592	2012-12-07	2012-06-10	2013-06-05	601010-99999	446.398882541382	35.733	-5.9	17.8453473343119	4.91770759755919
NIC267	0.785544	J	1e-5	1e-5	1e-5	0.214366	1e-5	1e-5	1e-5	1e-5	1e-5	1e-5	FALSE	38.69237	-9.31592	2012-12-07	2012-06-10	2013-06-05	601010-99999	446.398882541382	35.733	-5.9	17.8453473343119	4.91770759755919
NIC268	0.452486	J	0.368281	1e-5	0.049807	1e-5	0.048434	1e-5	1e-5	1e-5	1e-5	0.080932	FALSE	38.69237	-9.31592	2012-12-07	2012-06-10	2013-06-05	601010-99999	446.398882541382	35.733	-5.9	17.8453473343119	4.91770759755919
NIC269	0.836765	J	1e-5	1e-5	1e-5	1e-5	1e-5	1e-5	1e-5	1.1e-5	0.163144	1e-5	FALSE	38.69237	-9.31592	2012-12-07	2012-06-10	2013-06-05	601010-99999	446.398882541382	35.733	-5.9	17.8453473343119	4.91770759755919
NIC271	0.691917	G	1e-5	1e-5	1e-5	1e-5	1e-5	1e-5	0.691917	1e-5	1e-5	1e-5	FALSE	38.69237	-9.31592	2012-12-07	2012-06-10	2013-06-05	601010-99999	446.398882541382	35.733	-5.9	17.8453473343119	4.91770759755919
NIC272	0.968573	J	1e-5	1e-5	1e-5	1e-5	1.1e-5	1e-5	1e-5	1e-5	0.031337	1e-5	FALSE	39.769459	-8.756356	2012-12-09	2012-06-12	2013-06-07	601010-99999	513.668246192672	35.733	-5.9	17.8314947895646	4.91394693466519
NIC274	0.9999	J	1e-5	1e-5	1e-5	1e-5	1e-5	1e-5	1e-5	1e-5	1e-5	1e-5	FALSE	39.769459	-8.756356	2012-12-09	2012-06-12	2013-06-07	601010-99999	513.668246192672	35.733	-5.9	17.8314947895646	4.91394693466519
NIC275	0.830526	J	1e-5	1e-5	1e-5	0.169383	1e-5	1e-5	1.1e-5	1e-5	1e-5	1e-5	FALSE	39.769459	-8.756356	2012-12-09	2012-06-12	2013-06-07	601010-99999	513.668246192672	35.733	-5.9	17.8314947895646	4.91394693466519
NIC276	0.9999	J	1e-5	1e-5	1e-5	1e-5	1e-5	1e-5	1e-5	1e-5	1e-5	1e-5	FALSE	39.769459	-8.756356	2012-12-09	2012-06-12	2013-06-07	601010-99999	513.668246192672	35.733	-5.9	17.8314947895646	4.91394693466519
NIC277	0.604955	I	1e-5	1e-5	1e-5	0.394955	1e-5	1e-5	1e-5	1e-5	0.604955	1e-5	FALSE	43.716441	7.266138	2012-12-15	2012-06-18	2013-06-13	161150-99999	73.1377449490257	44.25	7.8	13.3859236783117	8.04632689718936
NIC3	0.484239	I	1e-5	1e-5	0.021269	0.463088	1e-5	1e-5	1e-5	1e-5	0.484239	0.002347	FALSE	43.3636	5.3215	2008-09-28	2008-04-01	2009-03-27	161150-99999	222.413920373665	44.25	7.8	12.6574815420037	7.92516406450473
NIC501	0.9999	I	1e-5	1e-5	1e-5	1e-5	1e-5	1e-5	1e-5	1e-5	0.9999	1e-5	FALSE	48.77302	2.2675	2013-09-14	2013-03-18	2014-03-13	106070-99999	347.934100024618	49.983	6.7	9.87634400850757	6.75166063201366
NIC511	0.664857	D	1e-5	1e-5	1e-5	0.664857	1e-5	1e-5	1e-5	1e-5	0.335053	1e-5	FALSE	40.8625	14.2623855	2013-11-14	2013-05-18	2014-05-13	162530-99999	26.768265552182	41.061	14.082	16.3063673706948	6.13632316363787
NIC513	0.9999	J	1e-5	1e-5	1e-5	1e-5	1e-5	1e-5	1e-5	1e-5	1e-5	1e-5	FALSE	38.776038	-9.167136	2013-11-30	2013-06-03	2014-05-29	601010-99999	444.508853820744	35.733	-5.9	18.5316726341473	4.87884802606464
NIC514	0.999892	J	1e-5	1e-5	1.8e-5	1e-5	1e-5	1e-5	1e-5	1e-5	1e-5	1e-5	FALSE	38.776038	-9.167136	2013-11-30	2013-06-03	2014-05-29	601010-99999	444.508853820744	35.733	-5.9	18.5316726341473	4.87884802606464
NIC515	0.417336	J	1e-5	1e-5	1e-5	0.334146	1e-5	1e-5	0.051678	1e-5	0.196771	1e-5	FALSE	38.776775	-9.165884	2013-11-30	2013-06-03	2014-05-29	601010-99999	444.498227224358	35.733	-5.9	18.5316726341473	4.87884802606464
NIC522	0.420282	D	1e-5	0.094386	1e-5	0.420282	1e-5	1e-5	0.050353	1e-5	0.198222	1e-5	FALSE	36.535679	-6.304441	2014-04-01	2013-10-03	2014-09-28	603180-99999	137.051033676148	35.583	-5.333	18.9423252873483	4.8683762919599
NIC523	0.463138	D	1e-5	1e-5	1e-5	0.463138	0.143358	1.4e-5	0.020281	1e-5	1e-5	1e-5	FALSE	36.535679	-6.29831	2014-04-01	2013-10-03	2014-09-28	601010-99999	96.0723508298861	35.733	-5.9	18.1089684220541	4.28876828175832
NIC526	0.327151	J	1e-5	1e-5	1e-5	0.268203	1e-5	1e-5	0.079686	1e-5	0.14343	0.18147	FALSE	36.535679	-6.304441	2014-04-01	2013-10-03	2014-09-28	601010-99999	96.2708870732319	35.733	-5.9	18.1089684220541	4.28876828175832
NIC527	0.624523	I	1e-5	0.027725	1e-5	0.154581	1e-5	1e-5	0.036296	1e-5	0.624523	1e-5	FALSE	36.535679	-6.304441	2014-04-01	2013-10-03	2014-09-28	601010-99999	96.2708870732319	35.733	-5.9	18.1089684220541	4.28876828175832
NIC528	0.762944	D	1e-5	1e-5	1e-5	0.762944	1e-5	1e-5	1e-5	1e-5	0.062372	1e-5	FALSE	36.535679	-6.29831	2014-04-01	2013-10-03	2014-09-28	602650-99999	623.341826151264	30.933	-6.9	20.8609575164749	7.7777634076514
NIC529	0.685008	D	1e-5	0.069957	1e-5	0.685008	1e-5	1e-5	1e-5	1e-5	0.070933	1e-5	FALSE	37.870754	-4.784967	2014-05-01	2013-11-02	2014-10-28	603200-99999	222.590337648304	35.917	-5.35	19.4275714285714	4.99103415033394
PB303	0.87241	D	1e-5	1e-5	0.1275	0.87241	1e-5	1e-5	1e-5	1e-5	1e-5	1e-5	FALSE	NA	NA	NA	NA	NA	NA	NA	NA	NA	NA	NA
PB306	0.9999	C	1e-5	1e-5	0.9999	1e-5	1e-5	1e-5	1e-5	1e-5	1e-5	1e-5	FALSE	NA	NA	NA	NA	NA	NA	NA	NA	NA	NA	NA
PS2025	0.9999	C	1e-5	1e-5	0.9999	1e-5	1e-5	1e-5	1e-5	1e-5	1e-5	1e-5	FALSE	NA	NA	NA	NA	NA	NA	NA	NA	NA	NA	NA
PX179	0.730226	D	1e-5	0.269674	1e-5	0.730226	1e-5	1e-5	2e-5	1e-5	1e-5	1e-5	FALSE	44.035	-123.058	2001-10-02	2001-04-05	2002-03-31	726930-24221	16.6503489075717	44.117	-123.217	11.0879812452082	5.58306772486864
QG2075	0.386104	K	0.043366	0.007539	0.097807	0.24636	1e-5	1e-5	0.07614	1e-5	1e-5	0.386104	FALSE	33.951	-83.376	2013-02-20	2012-08-24	2013-08-19	722270-13864	105.559338963385	33.917	-84.517	15.633481946649	7.3430925034512
QG536	0.522272	D	1e-5	1e-5	0.089958	0.522272	1e-5	1e-5	1e-5	1e-5	1e-5	1e-5	FALSE	37.7679	-122.4415	2010-12-30	2010-07-03	2011-06-28	724940-23234	17.7479999255939	37.62	-122.39	13.7938051871745	3.59459769981042
QG556	0.860267	C	1e-5	1e-5	0.860267	1e-5	0.139643	1e-5	1e-5	1e-5	1e-5	1e-5	FALSE	34.421629	-119.702021	2011-06-27	2010-12-29	2011-12-24	723925-23190	12.9683423377336	34.426	-119.84	14.2009431780265	3.14325419318719
QG557	0.9999	C	1e-5	1e-5	0.9999	1e-5	1e-5	1e-5	1e-5	1e-5	1e-5	1e-5	FALSE	34.421629	-119.702021	2011-06-27	2010-12-29	2011-12-24	723927-93110	51.7215972712624	34.201	-119.2	15.5614163432899	2.76644325079176
QW947	0.519928	D	1e-5	1e-5	1e-5	0.519928	1e-5	0.048502	0.172277	1e-5	0.259223	1e-5	FALSE	-33.4213	-70.6106	2013-04-12	2012-10-14	2013-10-09	855770-99999	6.85712970900169	-33.433	-70.683	15.195416172009	5.03467358758371
QX1211	0.9999	F	1e-5	1e-5	1e-5	1e-5	1e-5	0.9999	1e-5	1e-5	1e-5	1e-5	FALSE	37.7502	-122.4331	2007-11-26	2007-05-30	2008-05-24	724940-23234	15.6496951118136	37.62	-122.398	13.3433403279906	3.34662462697185
QX1212	0.806142	C	0.043174	1e-5	0.806142	1e-5	1e-5	1e-5	1e-5	1e-5	1e-5	0.150604	FALSE	37.7502	-122.4331	2007-11-26	2007-05-30	2008-05-24	724940-23234	15.6496951118136	37.62	-122.398	13.3433403279906	3.34662462697185
QX1233	0.855445	C	1e-5	1e-5	0.855445	0.144465	1e-5	1e-5	1e-5	1e-5	1e-5	1e-5	FALSE	37.8804	-122.2838	2007-11-24	2007-05-28	2008-05-22	724930-23230	18.5365765292943	37.755	-122.22	13.4087668931164	3.51880551123517
QX1791	0.559108	A	0.559108	0.107565	0.137053	1e-5	0.061847	1e-5	1e-5	1e-5	1e-5	0.134366	TRUE	20.6344	-156.3935	2011-01-27	2010-07-31	2011-07-26	911900-22516	29.6370877252862	20.902	-156.43	24.0121728663736	1.50175359917377
QX1792	0.617955	E	1e-5	1e-5	1e-5	0.220457	0.617955	1e-5	1e-5	1e-5	1e-5	1e-5	TRUE	20.70554	-156.35475	2011-01-28	2010-08-01	2011-07-27	911900-22516	22.8751435945497	20.902	-156.43	24.0109560084393	1.50073681709187
QX1793	0.875683	E	1e-5	1e-5	1e-5	1e-5	0.875683	1e-5	1e-5	1.2e-5	1e-5	1e-5	TRUE	20.70559	-156.35678	2011-01-28	2010-08-01	2011-07-27	911860-22534	91.5869778387957	21.157	-157.09	23.3415049214713	1.91537947621929
QX1794	0.855294	E	1e-5	1e-5	0.10701	0.037616	0.855294	1e-5	1e-5	1e-5	1e-5	1e-5	TRUE	20.70559	-156.35678	2011-01-28	2010-08-01	2011-07-27	911900-22516	22.7993706749478	20.902	-156.43	24.0109560084393	1.50073681709187
RC301	0.9999	D	1e-5	1e-5	1e-5	0.9999	1e-5	1e-5	1e-5	1e-5	1e-5	1e-5	FALSE	47.99	7.84	1983-01-01	1982-07-05	1983-06-30	108030-99999	1.33915218578616	48	7.85	11.3221654254386	6.97241765467483
WN2001	0.670023	K	0.035989	1e-5	1e-5	1e-5	1e-5	1e-5	0.261792	1e-5	0.032126	0.670023	FALSE	51.954422	6.303406	2008-06-26	2007-12-29	2008-12-23	104040-99999	22.7883387314175	51.733	6.267	10.9283755719234	6.06629319135733
WN2002	0.611919	D	1e-5	0.235821	1e-5	0.611919	1e-5	1e-5	0.148065	1e-5	0.004125	1e-5	FALSE	51.975285	5.694834	2007-11-20	2007-05-24	2008-05-18	104040-99999	47.6442218019057	51.733	6.267	10.7018474138227	6.092819656139
WN2033	0.504377	K	1e-5	1e-5	1e-5	0.495533	1e-5	1e-5	1e-5	1e-5	1e-5	0.504377	FALSE	51.975	5.694	2014-11-05	2014-05-09	2015-05-04	100001-99999	51.748562523629	51.602	6.142	11.6457014193141	6.54829977091689
WN2050	0.60703	I	0.004214	0.388676	1e-5	1e-5	1e-5	1e-5	1e-5	1e-5	0.60703	1e-5	FALSE	51.975	5.717	2014-11-11	2014-05-15	2015-05-10	100001-99999	50.8165014626962	51.602	6.142	11.7058412074946	6.56390807460592
XZ1513	0.843273	E	1e-5	1e-5	0.156637	1e-5	0.843273	1e-5	1e-5	1e-5	1e-5	1e-5	TRUE	22.14787	-159.63105	2014-10-08	2014-04-11	2015-04-06	911620-22501	20.1909918573645	22.033	-159.783	24.4529560808228	2.03519971278027
XZ1514	0.999894	F	1e-5	1.2e-5	1e-5	1e-5	1e-5	0.999894	1e-5	1e-5	1.3e-5	1e-5	TRUE	22.149	-159.668	2014-10-15	2014-04-18	2015-04-13	911620-22501	17.4879698409944	22.033	-159.783	24.4589289163497	2.0313041862353
XZ1515	0.569182	E	1e-5	1e-5	0.334387	1e-5	0.569182	0.096351	1e-5	1e-5	1e-5	1e-5	TRUE	22.149	-159.668	2014-10-15	2014-04-18	2015-04-13	911620-22501	17.4879698409944	22.033	-159.783	24.4589289163497	2.0313041862353
XZ1516	0.624136	F	0.174719	1e-5	1e-5	1e-5	1e-5	0.624136	1e-5	0.201065	1e-5	1e-5	TRUE	22.149	-159.668	2014-10-15	2014-04-18	2015-04-13	911620-22501	17.4879698409944	22.033	-159.783	24.4589289163497	2.0313041862353
