# Supplementary material for: Deep sampling of Hawaiian Caenorhabditis elegans reveals high genetic diversity and admixture with global populations
Source: eLife journal article supplement (doi:10.7554/elife.50465), 2019-12-03
Supplement: supp [file elife-50465-supp-v1.zip › elife_poa_e50465_Figure_5_figure_supplement_4_source_data_1.csv]

isotypes	cluster	frac_cluster	max_frac	K
ECA189	A	1e-5	0.781995	3
ECA701	A	0.785009	0.785009	3
ECA710	A	1e-5	0.839758	3
ECA369	A	0.133627	0.866363	3
ECA738	A	1e-5	0.868992	3
ECA706	A	1e-5	0.900387	3
XZ1516	A	0.902022	0.902022	3
ECA703	A	0.087795	0.912195	3
QX1793	A	1e-5	0.940623	3
ECA724	A	0.941254	0.941254	3
ECA372	A	1e-5	0.946294	3
XZ1515	A	0.021208	0.978782	3
ECA768	A	1.7e-5	0.999973	3
ECA812	A	1.4e-5	0.999976	3
ECA396	A	0.999978	0.999978	3
CB4856	A	1e-5	0.99998	3
DL238	A	1e-5	0.99998	3
ECA191	A	0.99998	0.99998	3
ECA347	A	0.99998	0.99998	3
ECA363	A	0.99998	0.99998	3
ECA705	A	1e-5	0.99998	3
ECA712	A	1e-5	0.99998	3
ECA722	A	0.99998	0.99998	3
ECA723	A	0.99998	0.99998	3
ECA730	A	0.99998	0.99998	3
ECA732	A	1e-5	0.99998	3
ECA733	A	1e-5	0.99998	3
ECA740	A	0.99998	0.99998	3
ECA741	A	0.99998	0.99998	3
ECA742	A	0.99998	0.99998	3
ECA743	A	1e-5	0.99998	3
ECA744	A	0.99998	0.99998	3
ECA745	A	0.99998	0.99998	3
ECA746	A	0.99998	0.99998	3
ECA760	A	1e-5	0.99998	3
ECA777	A	1e-5	0.99998	3
ECA778	A	1e-5	0.99998	3
ECA807	A	1e-5	0.99998	3
QX1791	A	1e-5	0.99998	3
QX1792	A	1e-5	0.99998	3
QX1794	A	1e-5	0.99998	3
XZ1513	A	1e-5	0.99998	3
XZ1514	A	0.99998	0.99998	3
ECA189	B	0.217995	0.781995	3
ECA701	B	1e-5	0.785009	3
ECA710	B	0.160232	0.839758	3
ECA369	B	1e-5	0.866363	3
ECA738	B	0.130998	0.868992	3
ECA706	B	0.099603	0.900387	3
XZ1516	B	1e-5	0.902022	3
ECA703	B	1e-5	0.912195	3
QX1793	B	0.059367	0.940623	3
ECA724	B	1e-5	0.941254	3
ECA372	B	0.053696	0.946294	3
XZ1515	B	1e-5	0.978782	3
ECA768	B	0.999973	0.999973	3
ECA812	B	0.999976	0.999976	3
ECA396	B	1.2e-5	0.999978	3
CB4856	B	1e-5	0.99998	3
DL238	B	1e-5	0.99998	3
ECA191	B	1e-5	0.99998	3
ECA347	B	1e-5	0.99998	3
ECA363	B	1e-5	0.99998	3
ECA705	B	1e-5	0.99998	3
ECA712	B	0.99998	0.99998	3
ECA722	B	1e-5	0.99998	3
ECA723	B	1e-5	0.99998	3
ECA730	B	1e-5	0.99998	3
ECA732	B	1e-5	0.99998	3
ECA733	B	1e-5	0.99998	3
ECA740	B	1e-5	0.99998	3
ECA741	B	1e-5	0.99998	3
ECA742	B	1e-5	0.99998	3
ECA743	B	1e-5	0.99998	3
ECA744	B	1e-5	0.99998	3
ECA745	B	1e-5	0.99998	3
ECA746	B	1e-5	0.99998	3
ECA760	B	0.99998	0.99998	3
ECA777	B	0.99998	0.99998	3
ECA778	B	0.99998	0.99998	3
ECA807	B	0.99998	0.99998	3
QX1791	B	1e-5	0.99998	3
QX1792	B	1e-5	0.99998	3
QX1794	B	1e-5	0.99998	3
XZ1513	B	1e-5	0.99998	3
XZ1514	B	1e-5	0.99998	3
ECA189	C	0.781995	0.781995	3
ECA701	C	0.214981	0.785009	3
ECA710	C	0.839758	0.839758	3
ECA369	C	0.866363	0.866363	3
ECA738	C	0.868992	0.868992	3
ECA706	C	0.900387	0.900387	3
XZ1516	C	0.097968	0.902022	3
ECA703	C	0.912195	0.912195	3
QX1793	C	0.940623	0.940623	3
ECA724	C	0.058736	0.941254	3
ECA372	C	0.946294	0.946294	3
XZ1515	C	0.978782	0.978782	3
ECA768	C	1e-5	0.999973	3
ECA812	C	1e-5	0.999976	3
ECA396	C	1e-5	0.999978	3
CB4856	C	0.99998	0.99998	3
DL238	C	0.99998	0.99998	3
ECA191	C	1e-5	0.99998	3
ECA347	C	1e-5	0.99998	3
ECA363	C	1e-5	0.99998	3
ECA705	C	0.99998	0.99998	3
ECA712	C	1e-5	0.99998	3
ECA722	C	1e-5	0.99998	3
ECA723	C	1e-5	0.99998	3
ECA730	C	1e-5	0.99998	3
ECA732	C	0.99998	0.99998	3
ECA733	C	0.99998	0.99998	3
ECA740	C	1e-5	0.99998	3
ECA741	C	1e-5	0.99998	3
ECA742	C	1e-5	0.99998	3
ECA743	C	0.99998	0.99998	3
ECA744	C	1e-5	0.99998	3
ECA745	C	1e-5	0.99998	3
ECA746	C	1e-5	0.99998	3
ECA760	C	1e-5	0.99998	3
ECA777	C	1e-5	0.99998	3
ECA778	C	1e-5	0.99998	3
ECA807	C	1e-5	0.99998	3
QX1791	C	0.99998	0.99998	3
QX1792	C	0.99998	0.99998	3
QX1794	C	0.99998	0.99998	3
XZ1513	C	0.99998	0.99998	3
XZ1514	C	1e-5	0.99998	3
QX1791	A	1e-5	0.566282	4
ECA701	A	0.137073	0.612131	4
XZ1516	A	0.178162	0.638497	4
XZ1515	A	1e-5	0.915658	4
ECA768	A	1e-5	0.999966	4
ECA741	A	1.3e-5	0.999967	4
CB4856	A	1e-5	0.99997	4
DL238	A	1e-5	0.99997	4
ECA189	A	1e-5	0.99997	4
ECA191	A	0.99997	0.99997	4
ECA347	A	1e-5	0.99997	4
ECA363	A	1e-5	0.99997	4
ECA369	A	1e-5	0.99997	4
ECA372	A	1e-5	0.99997	4
ECA396	A	0.99997	0.99997	4
ECA703	A	1e-5	0.99997	4
ECA705	A	1e-5	0.99997	4
ECA706	A	1e-5	0.99997	4
ECA710	A	1e-5	0.99997	4
ECA712	A	1e-5	0.99997	4
ECA722	A	0.99997	0.99997	4
ECA723	A	0.99997	0.99997	4
ECA724	A	1e-5	0.99997	4
ECA730	A	0.99997	0.99997	4
ECA732	A	1e-5	0.99997	4
ECA733	A	1e-5	0.99997	4
ECA738	A	1e-5	0.99997	4
ECA740	A	1e-5	0.99997	4
ECA742	A	1e-5	0.99997	4
ECA743	A	1e-5	0.99997	4
ECA744	A	0.99997	0.99997	4
ECA745	A	0.99997	0.99997	4
ECA746	A	0.99997	0.99997	4
ECA760	A	1e-5	0.99997	4
ECA777	A	1e-5	0.99997	4
ECA778	A	1e-5	0.99997	4
ECA807	A	1e-5	0.99997	4
ECA812	A	1e-5	0.99997	4
QX1792	A	1e-5	0.99997	4
QX1793	A	1e-5	0.99997	4
QX1794	A	1e-5	0.99997	4
XZ1513	A	1e-5	0.99997	4
XZ1514	A	1e-5	0.99997	4
QX1791	B	0.566282	0.566282	4
ECA701	B	0.250787	0.612131	4
XZ1516	B	0.183331	0.638497	4
XZ1515	B	1e-5	0.915658	4
ECA768	B	1.4e-5	0.999966	4
ECA741	B	1e-5	0.999967	4
CB4856	B	0.99997	0.99997	4
DL238	B	0.99997	0.99997	4
ECA189	B	1e-5	0.99997	4
ECA191	B	1e-5	0.99997	4
ECA347	B	1e-5	0.99997	4
ECA363	B	1e-5	0.99997	4
ECA369	B	0.99997	0.99997	4
ECA372	B	1e-5	0.99997	4
ECA396	B	1e-5	0.99997	4
ECA703	B	0.99997	0.99997	4
ECA705	B	1e-5	0.99997	4
ECA706	B	0.99997	0.99997	4
ECA710	B	1e-5	0.99997	4
ECA712	B	1e-5	0.99997	4
ECA722	B	1e-5	0.99997	4
ECA723	B	1e-5	0.99997	4
ECA724	B	1e-5	0.99997	4
ECA730	B	1e-5	0.99997	4
ECA732	B	0.99997	0.99997	4
ECA733	B	0.99997	0.99997	4
ECA738	B	1e-5	0.99997	4
ECA740	B	1e-5	0.99997	4
ECA742	B	1e-5	0.99997	4
ECA743	B	1e-5	0.99997	4
ECA744	B	1e-5	0.99997	4
ECA745	B	1e-5	0.99997	4
ECA746	B	1e-5	0.99997	4
ECA760	B	1e-5	0.99997	4
ECA777	B	1e-5	0.99997	4
ECA778	B	1e-5	0.99997	4
ECA807	B	1e-5	0.99997	4
ECA812	B	1e-5	0.99997	4
QX1792	B	1e-5	0.99997	4
QX1793	B	1e-5	0.99997	4
QX1794	B	1e-5	0.99997	4
XZ1513	B	1e-5	0.99997	4
XZ1514	B	1e-5	0.99997	4
QX1791	C	1e-5	0.566282	4
ECA701	C	0.612131	0.612131	4
XZ1516	C	0.638497	0.638497	4
XZ1515	C	0.084322	0.915658	4
ECA768	C	1e-5	0.999966	4
ECA741	C	0.999967	0.999967	4
CB4856	C	1e-5	0.99997	4
DL238	C	1e-5	0.99997	4
ECA189	C	1e-5	0.99997	4
ECA191	C	1e-5	0.99997	4
ECA347	C	0.99997	0.99997	4
ECA363	C	0.99997	0.99997	4
ECA369	C	1e-5	0.99997	4
ECA372	C	1e-5	0.99997	4
ECA396	C	1e-5	0.99997	4
ECA703	C	1e-5	0.99997	4
ECA705	C	1e-5	0.99997	4
ECA706	C	1e-5	0.99997	4
ECA710	C	1e-5	0.99997	4
ECA712	C	1e-5	0.99997	4
ECA722	C	1e-5	0.99997	4
ECA723	C	1e-5	0.99997	4
ECA724	C	0.99997	0.99997	4
ECA730	C	1e-5	0.99997	4
ECA732	C	1e-5	0.99997	4
ECA733	C	1e-5	0.99997	4
ECA738	C	1e-5	0.99997	4
ECA740	C	0.99997	0.99997	4
ECA742	C	0.99997	0.99997	4
ECA743	C	1e-5	0.99997	4
ECA744	C	1e-5	0.99997	4
ECA745	C	1e-5	0.99997	4
ECA746	C	1e-5	0.99997	4
ECA760	C	1e-5	0.99997	4
ECA777	C	1e-5	0.99997	4
ECA778	C	1e-5	0.99997	4
ECA807	C	1e-5	0.99997	4
ECA812	C	1e-5	0.99997	4
QX1792	C	1e-5	0.99997	4
QX1793	C	1e-5	0.99997	4
QX1794	C	1e-5	0.99997	4
XZ1513	C	1e-5	0.99997	4
XZ1514	C	0.99997	0.99997	4
QX1791	D	0.433698	0.566282	4
ECA701	D	1e-5	0.612131	4
XZ1516	D	1e-5	0.638497	4
XZ1515	D	0.915658	0.915658	4
ECA768	D	0.999966	0.999966	4
ECA741	D	1e-5	0.999967	4
CB4856	D	1e-5	0.99997	4
DL238	D	1e-5	0.99997	4
ECA189	D	0.99997	0.99997	4
ECA191	D	1e-5	0.99997	4
ECA347	D	1e-5	0.99997	4
ECA363	D	1e-5	0.99997	4
ECA369	D	1e-5	0.99997	4
ECA372	D	0.99997	0.99997	4
ECA396	D	1e-5	0.99997	4
ECA703	D	1e-5	0.99997	4
ECA705	D	0.99997	0.99997	4
ECA706	D	1e-5	0.99997	4
ECA710	D	0.99997	0.99997	4
ECA712	D	0.99997	0.99997	4
ECA722	D	1e-5	0.99997	4
ECA723	D	1e-5	0.99997	4
ECA724	D	1e-5	0.99997	4
ECA730	D	1e-5	0.99997	4
ECA732	D	1e-5	0.99997	4
ECA733	D	1e-5	0.99997	4
ECA738	D	0.99997	0.99997	4
ECA740	D	1e-5	0.99997	4
ECA742	D	1e-5	0.99997	4
ECA743	D	0.99997	0.99997	4
ECA744	D	1e-5	0.99997	4
ECA745	D	1e-5	0.99997	4
ECA746	D	1e-5	0.99997	4
ECA760	D	0.99997	0.99997	4
ECA777	D	0.99997	0.99997	4
ECA778	D	0.99997	0.99997	4
ECA807	D	0.99997	0.99997	4
ECA812	D	0.99997	0.99997	4
QX1792	D	0.99997	0.99997	4
QX1793	D	0.99997	0.99997	4
QX1794	D	0.99997	0.99997	4
XZ1513	D	0.99997	0.99997	4
XZ1514	D	1e-5	0.99997	4
QX1791	A	0.497984	0.501986	5
ECA701	A	0.005749	0.608858	5
XZ1516	A	1e-5	0.637007	5
ECA712	A	0.314718	0.685252	5
ECA189	A	0.88131	0.88131	5
ECA723	A	1e-5	0.999953	5
ECA744	A	1.6e-5	0.999954	5
CB4856	A	1e-5	0.99996	5
DL238	A	1e-5	0.99996	5
ECA191	A	1e-5	0.99996	5
ECA347	A	1e-5	0.99996	5
ECA363	A	1e-5	0.99996	5
ECA369	A	1e-5	0.99996	5
ECA372	A	0.99996	0.99996	5
ECA396	A	1e-5	0.99996	5
ECA703	A	1e-5	0.99996	5
ECA705	A	0.99996	0.99996	5
ECA706	A	1e-5	0.99996	5
ECA710	A	0.99996	0.99996	5
ECA722	A	1e-5	0.99996	5
ECA724	A	1e-5	0.99996	5
ECA730	A	1e-5	0.99996	5
ECA732	A	1e-5	0.99996	5
ECA733	A	1e-5	0.99996	5
ECA738	A	0.99996	0.99996	5
ECA740	A	1e-5	0.99996	5
ECA741	A	1e-5	0.99996	5
ECA742	A	1e-5	0.99996	5
ECA743	A	0.99996	0.99996	5
ECA745	A	1e-5	0.99996	5
ECA746	A	1e-5	0.99996	5
ECA760	A	1e-5	0.99996	5
ECA768	A	1e-5	0.99996	5
ECA777	A	1e-5	0.99996	5
ECA778	A	1e-5	0.99996	5
ECA807	A	1e-5	0.99996	5
ECA812	A	1e-5	0.99996	5
QX1792	A	0.99996	0.99996	5
QX1793	A	0.99996	0.99996	5
QX1794	A	0.99996	0.99996	5
XZ1513	A	0.99996	0.99996	5
XZ1514	A	1e-5	0.99996	5
XZ1515	A	0.99996	0.99996	5
QX1791	B	1e-5	0.501986	5
ECA701	B	0.608858	0.608858	5
XZ1516	B	0.637007	0.637007	5
ECA712	B	1e-5	0.685252	5
ECA189	B	1e-5	0.88131	5
ECA723	B	1.7e-5	0.999953	5
ECA744	B	1e-5	0.999954	5
CB4856	B	1e-5	0.99996	5
DL238	B	1e-5	0.99996	5
ECA191	B	1e-5	0.99996	5
ECA347	B	0.99996	0.99996	5
ECA363	B	0.99996	0.99996	5
ECA369	B	1e-5	0.99996	5
ECA372	B	1e-5	0.99996	5
ECA396	B	1e-5	0.99996	5
ECA703	B	1e-5	0.99996	5
ECA705	B	1e-5	0.99996	5
ECA706	B	1e-5	0.99996	5
ECA710	B	1e-5	0.99996	5
ECA722	B	1e-5	0.99996	5
ECA724	B	0.99996	0.99996	5
ECA730	B	1e-5	0.99996	5
ECA732	B	1e-5	0.99996	5
ECA733	B	1e-5	0.99996	5
ECA738	B	1e-5	0.99996	5
ECA740	B	0.99996	0.99996	5
ECA741	B	0.99996	0.99996	5
ECA742	B	0.99996	0.99996	5
ECA743	B	1e-5	0.99996	5
ECA745	B	1e-5	0.99996	5
ECA746	B	1e-5	0.99996	5
ECA760	B	1e-5	0.99996	5
ECA768	B	1e-5	0.99996	5
ECA777	B	1e-5	0.99996	5
ECA778	B	1e-5	0.99996	5
ECA807	B	1e-5	0.99996	5
ECA812	B	1e-5	0.99996	5
QX1792	B	1e-5	0.99996	5
QX1793	B	1e-5	0.99996	5
QX1794	B	1e-5	0.99996	5
XZ1513	B	1e-5	0.99996	5
XZ1514	B	0.99996	0.99996	5
XZ1515	B	1e-5	0.99996	5
QX1791	C	1e-5	0.501986	5
ECA701	C	1e-5	0.608858	5
XZ1516	C	1e-5	0.637007	5
ECA712	C	0.685252	0.685252	5
ECA189	C	0.11866	0.88131	5
ECA723	C	1e-5	0.999953	5
ECA744	C	1e-5	0.999954	5
CB4856	C	1e-5	0.99996	5
DL238	C	1e-5	0.99996	5
ECA191	C	1e-5	0.99996	5
ECA347	C	1e-5	0.99996	5
ECA363	C	1e-5	0.99996	5
ECA369	C	1e-5	0.99996	5
ECA372	C	1e-5	0.99996	5
ECA396	C	1e-5	0.99996	5
ECA703	C	1e-5	0.99996	5
ECA705	C	1e-5	0.99996	5
ECA706	C	1e-5	0.99996	5
ECA710	C	1e-5	0.99996	5
ECA722	C	1e-5	0.99996	5
ECA724	C	1e-5	0.99996	5
ECA730	C	1e-5	0.99996	5
ECA732	C	1e-5	0.99996	5
ECA733	C	1e-5	0.99996	5
ECA738	C	1e-5	0.99996	5
ECA740	C	1e-5	0.99996	5
ECA741	C	1e-5	0.99996	5
ECA742	C	1e-5	0.99996	5
ECA743	C	1e-5	0.99996	5
ECA745	C	1e-5	0.99996	5
ECA746	C	1e-5	0.99996	5
ECA760	C	0.99996	0.99996	5
ECA768	C	0.99996	0.99996	5
ECA777	C	0.99996	0.99996	5
ECA778	C	0.99996	0.99996	5
ECA807	C	0.99996	0.99996	5
ECA812	C	0.99996	0.99996	5
QX1792	C	1e-5	0.99996	5
QX1793	C	1e-5	0.99996	5
QX1794	C	1e-5	0.99996	5
XZ1513	C	1e-5	0.99996	5
XZ1514	C	1e-5	0.99996	5
XZ1515	C	1e-5	0.99996	5
QX1791	D	0.501986	0.501986	5
ECA701	D	0.245469	0.608858	5
XZ1516	D	0.183052	0.637007	5
ECA712	D	1e-5	0.685252	5
ECA189	D	1e-5	0.88131	5
ECA723	D	1e-5	0.999953	5
ECA744	D	1e-5	0.999954	5
CB4856	D	0.99996	0.99996	5
DL238	D	0.99996	0.99996	5
ECA191	D	1e-5	0.99996	5
ECA347	D	1e-5	0.99996	5
ECA363	D	1e-5	0.99996	5
ECA369	D	0.99996	0.99996	5
ECA372	D	1e-5	0.99996	5
ECA396	D	1e-5	0.99996	5
ECA703	D	0.99996	0.99996	5
ECA705	D	1e-5	0.99996	5
ECA706	D	0.99996	0.99996	5
ECA710	D	1e-5	0.99996	5
ECA722	D	1e-5	0.99996	5
ECA724	D	1e-5	0.99996	5
ECA730	D	1e-5	0.99996	5
ECA732	D	0.99996	0.99996	5
ECA733	D	0.99996	0.99996	5
ECA738	D	1e-5	0.99996	5
ECA740	D	1e-5	0.99996	5
ECA741	D	1e-5	0.99996	5
ECA742	D	1e-5	0.99996	5
ECA743	D	1e-5	0.99996	5
ECA745	D	1e-5	0.99996	5
ECA746	D	1e-5	0.99996	5
ECA760	D	1e-5	0.99996	5
ECA768	D	1e-5	0.99996	5
ECA777	D	1e-5	0.99996	5
ECA778	D	1e-5	0.99996	5
ECA807	D	1e-5	0.99996	5
ECA812	D	1e-5	0.99996	5
QX1792	D	1e-5	0.99996	5
QX1793	D	1e-5	0.99996	5
QX1794	D	1e-5	0.99996	5
XZ1513	D	1e-5	0.99996	5
XZ1514	D	1e-5	0.99996	5
XZ1515	D	1e-5	0.99996	5
QX1791	E	1e-5	0.501986	5
ECA701	E	0.139914	0.608858	5
XZ1516	E	0.179921	0.637007	5
ECA712	E	1e-5	0.685252	5
ECA189	E	1e-5	0.88131	5
ECA723	E	0.999953	0.999953	5
ECA744	E	0.999954	0.999954	5
CB4856	E	1e-5	0.99996	5
DL238	E	1e-5	0.99996	5
ECA191	E	0.99996	0.99996	5
ECA347	E	1e-5	0.99996	5
ECA363	E	1e-5	0.99996	5
ECA369	E	1e-5	0.99996	5
ECA372	E	1e-5	0.99996	5
ECA396	E	0.99996	0.99996	5
ECA703	E	1e-5	0.99996	5
ECA705	E	1e-5	0.99996	5
ECA706	E	1e-5	0.99996	5
ECA710	E	1e-5	0.99996	5
ECA722	E	0.99996	0.99996	5
ECA724	E	1e-5	0.99996	5
ECA730	E	0.99996	0.99996	5
ECA732	E	1e-5	0.99996	5
ECA733	E	1e-5	0.99996	5
ECA738	E	1e-5	0.99996	5
ECA740	E	1e-5	0.99996	5
ECA741	E	1e-5	0.99996	5
ECA742	E	1e-5	0.99996	5
ECA743	E	1e-5	0.99996	5
ECA745	E	0.99996	0.99996	5
ECA746	E	0.99996	0.99996	5
ECA760	E	1e-5	0.99996	5
ECA768	E	1e-5	0.99996	5
ECA777	E	1e-5	0.99996	5
ECA778	E	1e-5	0.99996	5
ECA807	E	1e-5	0.99996	5
ECA812	E	1e-5	0.99996	5
QX1792	E	1e-5	0.99996	5
QX1793	E	1e-5	0.99996	5
QX1794	E	1e-5	0.99996	5
XZ1513	E	1e-5	0.99996	5
XZ1514	E	1e-5	0.99996	5
XZ1515	E	1e-5	0.99996	5
