# Supplementary material for: Deep sampling of Hawaiian Caenorhabditis elegans reveals high genetic diversity and admixture with global populations
Source: eLife journal article supplement (doi:10.7554/elife.50465), 2019-12-03
Supplement: supp [file elife-50465-supp-v1.zip › elife_poa_e50465_Figure_5_figure_supplement_4_source_data_2.csv]

K	CV
2	0.6771
2	0.6771
2	0.67758
2	0.67758
2	0.67769
2	0.67769
2	0.67821
2	0.67821
2	0.67857
2	0.67857
2	0.6787
2	0.6787
2	0.67895
2	0.67895
2	0.67924
2	0.67924
2	0.67982
2	0.67982
2	0.68069
2	0.68069
3	0.62061
3	0.62061
3	0.62183
3	0.62183
3	0.62238
3	0.62238
3	0.6224
3	0.6224
3	0.6655
3	0.6655
3	0.70525
3	0.70525
3	0.70696
3	0.70696
3	0.70867
3	0.70867
3	0.70926
3	0.70926
3	0.70961
3	0.70961
4	0.61451
4	0.61451
4	0.65643
4	0.65643
4	0.65679
4	0.65679
4	0.65764
4	0.65764
4	0.6587
4	0.6587
4	0.65915
4	0.65915
4	0.65989
4	0.65989
4	0.66004
4	0.66004
4	0.6606
4	0.6606
4	0.70425
4	0.70425
5	0.65603
5	0.65603
5	0.65769
5	0.65769
5	0.6577
5	0.6577
5	0.65796
5	0.65796
5	0.6591
5	0.6591
5	0.6591
5	0.6591
5	0.65926
5	0.65926
5	0.6718
5	0.6718
5	0.67561
5	0.67561
5	0.69987
5	0.69987
6	0.67406
6	0.67406
6	0.67736
6	0.67736
6	0.69175
6	0.69175
6	0.69286
6	0.69286
6	0.69296
6	0.69296
6	0.69304
6	0.69304
6	0.69394
6	0.69394
6	0.69545
6	0.69545
6	0.70239
6	0.70239
6	0.72041
6	0.72041
7	0.71095
7	0.71095
7	0.71136
7	0.71136
7	0.71164
7	0.71164
7	0.74075
7	0.74075
7	0.75933
7	0.75933
7	0.76213
7	0.76213
7	0.77896
7	0.77896
7	0.78135
7	0.78135
7	0.79394
7	0.79394
7	0.79577
7	0.79577
8	0.76743
8	0.76743
8	0.77816
8	0.77816
8	0.78361
8	0.78361
8	0.79533
8	0.79533
8	0.79678
8	0.79678
8	0.79688
8	0.79688
8	0.82783
8	0.82783
8	0.85025
8	0.85025
8	0.86148
8	0.86148
8	0.8917
8	0.8917
9	0.80803
9	0.80803
9	0.81371
9	0.81371
9	0.85112
9	0.85112
9	0.85256
9	0.85256
9	0.85259
9	0.85259
9	0.86766
9	0.86766
9	0.87023
9	0.87023
9	0.8764
9	0.8764
9	0.89803
9	0.89803
9	0.90512
9	0.90512
10	0.85661
10	0.85661
10	0.87802
10	0.87802
10	0.89733
10	0.89733
10	0.92638
10	0.92638
10	0.93685
10	0.93685
10	0.93723
10	0.93723
10	0.94617
10	0.94617
10	0.95928
10	0.95928
10	0.97355
10	0.97355
10	1.02839
10	1.02839
