# Supplementary material for: Deep sampling of Hawaiian Caenorhabditis elegans reveals high genetic diversity and admixture with global populations
Source: eLife journal article supplement (doi:10.7554/elife.50465), 2019-12-03
Supplement: supp [file elife-50465-supp-v1.zip › elife_poa_e50465_Figure_5_source_data_3.csv]

pop_assignment	n	total_perc	cluster	cluster_perc
A	8	99.9999875	perc_a	92.69058749999999
A	8	99.9999875	perc_b	1.3454374999999998
A	8	99.9999875	perc_d	0.001
A	8	99.9999875	perc_e	2.563375
A	8	99.9999875	perc_c	1.7140374999999999
A	8	99.9999875	perc_f	0.001
A	8	99.9999875	perc_g	0.001
A	8	99.9999875	perc_h	0.001075
A	8	99.9999875	perc_i	0.001025
A	8	99.9999875	perc_j	0.001
A	8	99.9999875	perc_k	1.68045
B	33	99.99999696969698	perc_a	0.3573454545454545
B	33	99.99999696969698	perc_b	78.3977606060606
B	33	99.99999696969698	perc_d	9.481666666666667
B	33	99.99999696969698	perc_e	0.0010030303030303031
B	33	99.99999696969698	perc_c	0.0010212121212121211
B	33	99.99999696969698	perc_f	0.001
B	33	99.99999696969698	perc_g	0.2039878787878788
B	33	99.99999696969698	perc_h	0.0010121212121212122
B	33	99.99999696969698	perc_i	9.927530303030304
B	33	99.99999696969698	perc_j	1.415769696969697
B	33	99.99999696969698	perc_k	0.21190000000000003
C	28	100	perc_a	0.6216178571428572
C	28	100	perc_b	0.5055857142857142
C	28	100	perc_d	10.558121428571429
C	28	100	perc_e	0.49968928571428567
C	28	100	perc_c	80.21921428571429
C	28	100	perc_f	0.0010035714285714285
C	28	100	perc_g	0.24514642857142854
C	28	100	perc_h	0.0010357142857142856
C	28	100	perc_i	0.7696107142857144
C	28	100	perc_j	4.260953571428572
C	28	100	perc_k	2.3180214285714285
D	61	100	perc_a	0.7301967213114754
D	61	100	perc_b	6.250637704918033
D	61	100	perc_d	69.2603786885246
D	61	100	perc_e	0.30989180327868854
D	61	100	perc_c	1.89037868852459
D	61	100	perc_f	0.0805032786885246
D	61	100	perc_g	1.561644262295082
D	61	100	perc_h	0.0010114754098360657
D	61	100	perc_i	9.344452459016393
D	61	100	perc_j	9.874147540983607
D	61	100	perc_k	0.6967573770491804
E	19	99.9999947368421	perc_a	0.0010421052631578948
E	19	99.9999947368421	perc_b	0.23634736842105264
E	19	99.9999947368421	perc_d	1.6338894736842104
E	19	99.9999947368421	perc_e	86.17545789473684
E	19	99.9999947368421	perc_c	7.181105263157894
E	19	99.9999947368421	perc_f	0.5080578947368422
E	19	99.9999947368421	perc_g	0.001
E	19	99.9999947368421	perc_h	0.0010157894736842106
E	19	99.9999947368421	perc_i	0.17248947368421053
E	19	99.9999947368421	perc_j	1.5124684210526318
E	19	99.9999947368421	perc_k	2.577121052631579
F	11	99.99999090909091	perc_a	3.869327272727273
F	11	99.99999090909091	perc_b	0.0011181818181818183
F	11	99.99999090909091	perc_d	0.001
F	11	99.99999090909091	perc_e	0.0010272727272727274
F	11	99.99999090909091	perc_c	0.07755454545454545
F	11	99.99999090909091	perc_f	92.7477090909091
F	11	99.99999090909091	perc_g	0.0010272727272727274
F	11	99.99999090909091	perc_h	3.298081818181818
F	11	99.99999090909091	perc_i	0.0010727272727272727
F	11	99.99999090909091	perc_j	0.0010727272727272727
F	11	99.99999090909091	perc_k	0.001
G	15	100.00001333333334	perc_a	3.459206666666667
G	15	100.00001333333334	perc_b	0.7900066666666667
G	15	100.00001333333334	perc_d	0.6215333333333333
G	15	100.00001333333334	perc_e	0.0010333333333333334
G	15	100.00001333333334	perc_c	0.001
G	15	100.00001333333334	perc_f	0.001
G	15	100.00001333333334	perc_g	78.72223333333334
G	15	100.00001333333334	perc_h	0.001
G	15	100.00001333333334	perc_i	2.454346666666667
G	15	100.00001333333334	perc_j	13.947653333333331
G	15	100.00001333333334	perc_k	0.001
H	8	100.00000000000001	perc_a	0.0010375000000000002
H	8	100.00000000000001	perc_b	0.001075
H	8	100.00000000000001	perc_d	0.001025
H	8	100.00000000000001	perc_e	0.001
H	8	100.00000000000001	perc_c	0.001
H	8	100.00000000000001	perc_f	0.001
H	8	100.00000000000001	perc_g	0.001
H	8	100.00000000000001	perc_h	99.98977500000001
H	8	100.00000000000001	perc_i	0.0010875
H	8	100.00000000000001	perc_j	0.001
H	8	100.00000000000001	perc_k	0.001
I	37	100.0000054054054	perc_a	1.0173189189189187
I	37	100.0000054054054	perc_b	7.133516216216215
I	37	100.0000054054054	perc_d	11.11478108108108
I	37	100.0000054054054	perc_e	0.0010432432432432434
I	37	100.0000054054054	perc_c	0.9889648648648648
I	37	100.0000054054054	perc_f	0.0010216216216216217
I	37	100.0000054054054	perc_g	0.09907027027027027
I	37	100.0000054054054	perc_h	0.001
I	37	100.0000054054054	perc_i	76.69317567567568
I	37	100.0000054054054	perc_j	2.7727594594594596
I	37	100.0000054054054	perc_k	0.17735405405405405
J	36	100	perc_a	2.1632305555555553
J	36	100	perc_b	2.853658333333333
J	36	100	perc_d	13.797277777777778
J	36	100	perc_e	0.5719055555555556
J	36	100	perc_c	1.0283416666666667
J	36	100	perc_f	0.001
J	36	100	perc_g	3.0631222222222223
J	36	100	perc_h	0.001002777777777778
J	36	100	perc_i	6.395833333333334
J	36	100	perc_j	68.37763333333334
J	36	100	perc_k	1.7469944444444445
K	20	99.999995	perc_a	0.397675
K	20	99.999995	perc_b	0.8268899999999999
K	20	99.999995	perc_d	13.762795
K	20	99.999995	perc_e	1.6481500000000002
K	20	99.999995	perc_c	5.358585000000001
K	20	99.999995	perc_f	0.0010149999999999998
K	20	99.999995	perc_g	1.7615150000000004
K	20	99.999995	perc_h	0.001
K	20	99.999995	perc_i	3.371825
K	20	99.999995	perc_j	2.410395
K	20	99.999995	perc_k	70.46015
