# Supplementary material for: Deep sampling of Hawaiian Caenorhabditis elegans reveals high genetic diversity and admixture with global populations
Source: eLife journal article supplement (doi:10.7554/elife.50465), 2019-12-03
Supplement: supp [file elife-50465-supp-v1.zip › elife_poa_e50465_Figure_6_figure_supplement_1_source_data_1.csv]

strain	isotype	long	lat	state	country	max_pop_frac	pop_assignment	A	B	C	D	E	F	G	H	I	J	K	Hawaiian
ECA339	ECA252	0.4948	44.8358	Nouvelle-Aquitaine	France	0.9999	B	1e-5	0.9999	1e-5	1e-5	1e-5	1e-5	1e-5	1e-5	1e-5	1e-5	1e-5	FALSE
ECA253	N2	-2.59	51.45	England	United Kingdom	0.9999	B	1e-5	0.9999	1e-5	1e-5	1e-5	1e-5	1e-5	1e-5	1e-5	1e-5	1e-5	FALSE
LSJ1	LSJ1	-2.59	51.45	England	United Kingdom	0.9999	B	1e-5	0.9999	1e-5	1e-5	1e-5	1e-5	1e-5	1e-5	1e-5	1e-5	1e-5	FALSE
CB4856	CB4856	-157.86	21.33	Hawaii	United States	0.9999	A	0.9999	1e-5	1e-5	1e-5	1e-5	1e-5	1e-5	1e-5	1e-5	1e-5	1e-5	TRUE
ECA249	CB4857	-117.719	34.096	California	United States	0.999899	C	1e-5	1e-5	0.999899	1e-5	1e-5	1.1e-5	1e-5	1e-5	1e-5	1e-5	1e-5	FALSE
ECA251	CB4858	-118.1	34.1	California	United States	0.9999	C	1e-5	1e-5	0.9999	1e-5	1e-5	1e-5	1e-5	1e-5	1e-5	1e-5	1e-5	FALSE
ECA252	ECA252	-118.1	34.1	California	United States	0.9999	B	1e-5	0.9999	1e-5	1e-5	1e-5	1e-5	1e-5	1e-5	1e-5	1e-5	1e-5	FALSE
CB4854	CB4854	-118.131	34.189	California	United States	0.533478	D	1e-5	1e-5	1e-5	0.533478	1e-5	1e-5	1e-5	1e-5	1e-5	0.466432	1e-5	FALSE
ECA245	CB4853	-118.131	34.171	California	United States	0.692965	C	1e-5	1e-5	0.692965	0.306945	1e-5	1e-5	1e-5	1e-5	1e-5	1e-5	1e-5	FALSE
ECA246	CB4853	-118.131	34.189	California	United States	0.692965	C	1e-5	1e-5	0.692965	0.306945	1e-5	1e-5	1e-5	1e-5	1e-5	1e-5	1e-5	FALSE
ECA248	CB4855	-122.14	37.44	California	United States	0.815787	C	1e-5	1e-5	0.815787	0.184123	1e-5	1e-5	1e-5	1e-5	1e-5	1e-5	1e-5	FALSE
AB2	CB4858	138.59	-34.93	South Australia	Australia	0.9999	C	1e-5	1e-5	0.9999	1e-5	1e-5	1e-5	1e-5	1e-5	1e-5	1e-5	1e-5	FALSE
AB1	AB1	138.59	-34.93	South Australia	Australia	0.542764	D	1e-5	0.457146	1e-5	0.542764	1e-5	1e-5	1e-5	1e-5	1e-5	1e-5	1e-5	FALSE
RC301	RC301	7.84	47.99	Baden-Württemberg	Germany	0.9999	D	1e-5	1e-5	1e-5	0.9999	1e-5	1e-5	1e-5	1e-5	1e-5	1e-5	1e-5	FALSE
KR314	KR314	-123.13	49.28	British Columbia	Canada	0.6276	D	1e-5	1e-5	0.066172	0.6276	1e-5	1e-5	1e-5	1e-5	0.02339	0.126669	0.15611	FALSE
CB4932	CB4932	-3.1	51.02	England	United Kingdom	0.604814	B	1.9e-5	0.604814	1e-5	1e-5	1e-5	1e-5	1e-5	1.1e-5	0.395086	1e-5	1e-5	FALSE
JU258	JU258	-16.89	32.73	Madeira	Portugal	0.351847	G	0.132455	0.070774	1e-5	1e-5	1e-5	1e-5	0.351847	1e-5	0.097688	0.347177	1e-5	FALSE
PX179	PX179	-123.058	44.035	Oregon	United States	0.730226	D	1e-5	0.269674	1e-5	0.730226	1e-5	1e-5	2e-5	1e-5	1e-5	1e-5	1e-5	FALSE
JU263	JU310	1.06	46.63	Centre	France	0.587041	I	1e-5	1e-5	1e-5	0.412869	1e-5	1e-5	1e-5	1e-5	0.587041	1e-5	1e-5	FALSE
MY6	MY18	7.53	51.96	North Rhine-Westphalia	Germany	0.9999	K	1e-5	1e-5	1e-5	1e-5	1e-5	1e-5	1e-5	1e-5	1e-5	1e-5	0.9999	FALSE
MY2	MY23	7.53	51.96	North Rhine-Westphalia	Germany	0.510437	E	1e-5	1e-5	1e-5	1e-5	0.510437	1e-5	1e-5	1e-5	1e-5	1e-5	0.489473	FALSE
MY1	MY1	7.31	52.54	Niedersachsen	Germany	0.632621	J	1e-5	1e-5	1e-5	0.33299	1e-5	1e-5	1e-5	1e-5	1e-5	0.632621	0.03431	FALSE
MY10	MY10	7.53	51.96	Nordrhein-Westfalen	Germany	0.624069	D	1e-5	1e-5	1e-5	0.624069	1e-5	1e-5	0.302755	1e-5	0.036305	0.036801	1e-5	FALSE
MY16	MY16	7.57	51.93	Nordrhein-Westfalen	Germany	0.879196	K	1e-5	1e-5	1e-5	1e-5	0.120714	1e-5	1e-5	1e-5	1e-5	1e-5	0.879196	FALSE
JU400	JU394	-0.32	49.28	Lower Normandy	France	0.9999	B	1e-5	0.9999	1e-5	1e-5	1e-5	1e-5	1e-5	1e-5	1e-5	1e-5	1e-5	FALSE
JU393	JU393	-0.32	49.28	Basse-Normandie	France	0.840683	I	1e-5	0.159227	1e-5	1e-5	1e-5	1e-5	1e-5	1e-5	0.840683	1e-5	1e-5	FALSE
JU397	JU397	-0.32	49.28	Basse-Normandie	France	0.7884	I	1e-5	0.211507	1e-5	1e-5	1.4e-5	1e-5	1e-5	1e-5	0.7884	1e-5	1e-5	FALSE
JU312	JU311	4.4	44.42	Auvergne Rhône-Alpes	France	0.782558	B	1e-5	0.782558	1e-5	0.065245	1e-5	1e-5	1e-5	1e-5	0.140303	1e-5	0.011824	FALSE
JU315	JU311	4.4	44.2	Languedoc-Roussillon	France	0.782558	B	1e-5	0.782558	1e-5	0.065245	1e-5	1e-5	1e-5	1e-5	0.140303	1e-5	0.011824	FALSE
JU322	JU323	4.4	44.42	Rhone-Alpes	France	0.430619	I	1e-5	1e-5	1e-5	0.372107	1e-5	1e-5	1e-5	1e-5	0.430619	0.197194	1e-5	FALSE
JU345	JU346	4.4	44.42	Rhone-Alpes	France	0.507458	D	1e-5	1e-5	1e-5	0.507458	1e-5	1e-5	1e-5	1e-5	0.492452	1e-5	1e-5	FALSE
JU363	JU360	2.23	48.98	Île-de-France	France	0.549732	K	1e-5	1e-5	1e-5	0.386084	1e-5	1e-5	1e-5	1e-5	0.064104	1e-5	0.549732	FALSE
JU361	JU367	2.23	48.98	Île-de-France	France	0.945253	B	1e-5	0.945253	1e-5	0.054657	1e-5	1e-5	1e-5	1e-5	1e-5	1e-5	1e-5	FALSE
JU406	JU406	-0.32	49.28	Basse-Normandie	France	0.9999	B	1e-5	0.9999	1e-5	1e-5	1e-5	1e-5	1e-5	1e-5	1e-5	1e-5	1e-5	FALSE
CX11254	CX11254	-118.114835	34.130138	California	United States	0.656296	C	1e-5	1e-5	0.656296	1e-5	1e-5	1e-5	1e-5	1e-5	1e-5	0.237537	0.106087	FALSE
CX11262	CX11262	-118.114835	34.130138	California	United States	0.9999	C	1e-5	1e-5	0.9999	1e-5	1e-5	1e-5	1e-5	1e-5	1e-5	1e-5	1e-5	FALSE
CX11264	CX11264	-118.114835	34.130138	California	United States	0.9999	C	1e-5	1e-5	0.9999	1e-5	1e-5	1e-5	1e-5	1e-5	1e-5	1e-5	1e-5	FALSE
CX11271	CX11271	-118.12532	34.13712	California	United States	0.441877	J	1e-5	1e-5	0.271679	0.286364	1e-5	1e-5	1e-5	1e-5	1e-5	0.441877	1e-5	FALSE
CX11276	CX11276	-118.21198	34.20111	California	United States	0.591298	C	1e-5	0.015529	0.591298	0.185454	1e-5	1e-5	1e-5	1e-5	0.009696	0.197963	1e-5	FALSE
CX11285	CX11285	-118.05496	34.14331	California	United States	0.662305	C	1.1e-5	1e-5	0.662305	1e-5	1e-5	1e-5	1e-5	1e-5	1e-5	0.337604	1e-5	FALSE
CX11314	CX11314	-118.10987	34.12946	California	United States	0.9999	C	1e-5	1e-5	0.9999	1e-5	1e-5	1e-5	1e-5	1e-5	1e-5	1e-5	1e-5	FALSE
JU440	JU440	1.56	48.715	Centre	France	0.648635	B	1e-5	0.648635	1e-5	0.205326	1e-5	1e-5	1e-5	1e-5	0.145959	1e-5	1e-5	FALSE
JT11398	JT11398	-122.275484	47.763944	Washington	United States	0.690335	D	1e-5	0.160151	1e-5	0.690335	1e-5	1e-5	1e-5	1e-5	0.110807	0.038637	1e-5	FALSE
CX11292	CX11292	-118.30582	34.13531	California	United States	0.727048	C	1e-5	1e-5	0.727048	0.272862	1e-5	1e-5	1e-5	1e-5	1e-5	1e-5	1e-5	FALSE
JU533	JU1213	-3.81	48.71	Brittany	France	0.9999	I	1e-5	1e-5	1e-5	1e-5	1e-5	1e-5	1e-5	1e-5	0.9999	1e-5	1e-5	FALSE
JU561	JU561	-3.81	48.71	Bretagne	France	0.785725	D	1e-5	0.194369	1e-5	0.785725	1e-5	1e-5	1e-5	1e-5	0.019826	1e-5	1e-5	FALSE
ED3005	ED3005	-3.36	55.94	Scotland	United Kingdom	0.677598	K	1e-5	1e-5	0.262562	0.05976	1e-5	1e-5	1e-5	1e-5	1e-5	1e-5	0.677598	FALSE
ED3011	ED3011	-3.19	55.92	Scotland	United Kingdom	0.335005	C	1e-5	1e-5	0.335005	0.242701	1e-5	1e-5	1e-5	1e-5	1e-5	0.135938	0.286286	FALSE
ED3012	ED3012	-3.19	55.92	Scotland	United Kingdom	0.72135	B	1e-5	0.72135	1e-5	0.27856	1e-5	1e-5	1e-5	1e-5	1e-5	1e-5	1e-5	FALSE
ED3021	ED3005	-3.19	55.92	Scotland	United Kingdom	0.677598	K	1e-5	1e-5	0.262562	0.05976	1e-5	1e-5	1e-5	1e-5	1e-5	1e-5	0.677598	FALSE
ED3017	ED3017	-3.19	55.92	Scotland	United Kingdom	0.540785	D	1e-5	1e-5	1e-5	0.540785	1e-5	1e-5	1e-5	1e-5	0.459125	1e-5	1e-5	FALSE
JU642	JU642	2.5	48.84	Île-de-France	France	0.505091	D	1e-5	1e-5	1e-5	0.505091	1e-5	1e-5	1e-5	1e-5	0.264312	0.230516	1e-5	FALSE
JU751	JU751	2.5	48.84	Île-de-France	France	0.99253	K	1e-5	1e-5	1e-5	0.00738	1e-5	1e-5	1e-5	1e-5	1e-5	1e-5	0.99253	FALSE
LKC34	LKC34	46	-18	Antananarivo Province	Madagascar	0.9999	J	1e-5	1e-5	1e-5	1e-5	1e-5	1e-5	1e-5	1e-5	1e-5	0.9999	1e-5	FALSE
JU774	JU774	-9.34	38.683	Lisbon	Portugal	0.653356	J	1e-5	1e-5	1e-5	0.288859	0.057705	1e-5	1e-5	1e-5	1e-5	0.653356	1e-5	FALSE
JU775	JU775	-9.1486	38.7175	Lisbon	Portugal	0.9999	G	1e-5	1e-5	1e-5	1e-5	1e-5	1e-5	0.9999	1e-5	1e-5	1e-5	1e-5	FALSE
JU778	JU778	-9.1491	38.719	Lisbon	Portugal	0.912188	J	1e-5	1e-5	1e-5	1e-5	0.055318	1e-5	0.032413	1e-5	1e-5	0.912188	1e-5	FALSE
JU782	JU782	-9.1503	38.7191	Lisbon	Portugal	0.66968	G	1e-5	1e-5	1e-5	0.026341	1e-5	1e-5	0.66968	1e-5	1e-5	0.303899	1e-5	FALSE
JU792	JU792	0.24	43.06	Midi-Pyrénées	France	0.999897	I	1e-5	1e-5	1e-5	1e-5	1.3e-5	1e-5	1e-5	1e-5	0.999897	1e-5	1e-5	FALSE
JU830	JU830	9.05	48.52	Baden-Württemberg	Germany	0.506807	K	1e-5	1.7e-5	1e-5	0.42004	1e-5	1.3e-5	1.6e-5	1e-5	1e-5	0.073057	0.506807	FALSE
JU847	JU847	7.461	48.46	Alsace-Champagne-Ardenne-Lorraine	France	0.566412	I	1e-5	0.165206	1e-5	0.267768	1e-5	1e-5	1e-5	1e-5	0.566412	5.44e-4	1e-5	FALSE
ED3048	ED3048	19.316667	-33.366667	Western Cape	South Africa	0.679556	D	1.4e-5	1.7e-5	1e-5	0.679556	1e-5	1e-5	1e-5	1e-5	1e-5	0.320344	1e-5	FALSE
ED3049	ED3049	19.316667	-33.366667	Western Cape	South Africa	0.502642	J	1e-5	1e-5	1e-5	0.348489	1e-5	1e-5	1e-5	1e-5	0.148789	0.502642	1e-5	FALSE
ED3040	ED3040	28.016667	-26.166667	Gauteng	South Africa	0.721979	J	1e-5	1e-5	1e-5	0.277931	1e-5	1e-5	1e-5	1e-5	1e-5	0.721979	1e-5	FALSE
ED3046	ED3046	19.316667	-33.366667	Western Cape	South Africa	0.494246	J	1e-5	1e-5	1e-5	0.352974	1e-5	1e-5	1e-5	1e-5	0.1527	0.494246	1e-5	FALSE
ED3052	ED3052	19.316667	-33.366667	Western Cape	South Africa	0.74927	J	1e-5	1e-5	1e-5	0.25064	1e-5	1e-5	1e-5	1e-5	1e-5	0.74927	1e-5	FALSE
ED3057	ED3073	36.65	-1.083333	Kiambu County	Kenya	0.934359	D	1e-5	1e-5	1e-5	0.934359	1e-5	1e-5	1e-5	1e-5	1e-5	0.065551	1e-5	FALSE
ED3077	ED3077	36.8	-1.316667	Nairobi County	Kenya	0.75534	D	1e-5	1e-5	1e-5	0.75534	1e-5	1e-5	0.002367	1e-5	0.034257	0.207966	1e-5	FALSE
EG4348	EG4349	-111.87316	40.77167	Utah	United States	0.569544	K	1e-5	1e-5	1e-5	0.222824	1e-5	1e-5	0.014195	1e-5	0.193368	1e-5	0.569544	FALSE
EG4349	EG4349	-111.87316	40.771467	Utah	United States	0.569544	K	1e-5	1e-5	1e-5	0.222824	1e-5	1e-5	0.014195	1e-5	0.193368	1e-5	0.569544	FALSE
EG4347	EG4347	-123.07108	44.04789	Oregon	United States	0.675313	D	1e-5	0.261096	0.063511	0.675313	1e-5	1e-5	1e-5	1e-5	1e-5	1e-5	1e-5	FALSE
JU1088	JU1088	138.0149	34.7613	Shizuoka-ken	Japan	0.78102	D	1e-5	1e-5	1e-5	0.78102	1e-5	1e-5	1e-5	1e-5	1e-5	0.21889	1e-5	FALSE
EG4724	EG4724	-8.3476	41.6288	Braga	Portugal	0.64855	J	1e-5	0.020153	1e-5	0.20714	1e-5	1e-5	1e-5	1e-5	0.124086	0.64855	1e-5	FALSE
EG4725	EG4725	-8.3476	41.6288	Braga	Portugal	0.593241	J	1e-5	1e-5	1e-5	0.124487	1e-5	1e-5	0.282191	1e-5	1e-5	0.593241	1e-5	FALSE
JU1172	JU1172	-73.04	-36.87	Región del Bío Bío	Chile	0.765549	C	1e-5	1e-5	0.765549	0.234361	1e-5	1e-5	1e-5	1e-5	1e-5	1e-5	1e-5	FALSE
NIC166	NIC166	6.89775	46.72722	Vaud	Switzerland	0.375155	I	1e-5	0.042248	1e-5	0.351926	1e-5	1e-5	1e-5	1e-5	0.375155	0.230601	1e-5	FALSE
JU1200	JU1200	-4.6	55.577	Scotland	United Kingdom	0.682998	B	1e-5	0.682998	1e-5	0.316912	1e-5	1e-5	1e-5	1e-5	1e-5	1e-5	1e-5	FALSE
JU1212	JU1212	-3.81	48.71	Bretagne	France	0.725328	B	0.08567	0.725328	1e-5	1e-5	1.1e-5	1e-5	1e-5	1e-5	0.188922	1e-5	1e-5	FALSE
EG4946	EG4946	-111.82184	40.72596	Utah	United States	0.569549	D	1e-5	0.024101	0.406269	0.569549	1e-5	1e-5	1e-5	1.1e-5	1e-5	1e-5	1e-5	FALSE
JU1242	JU1242	1.9595	49.1269	Île-de-France	France	0.9999	I	1e-5	1e-5	1e-5	1e-5	1e-5	1e-5	1e-5	1e-5	0.9999	1e-5	1e-5	FALSE
JU1246	JU1246	1.96152	49.12618	Île-de-France	France	0.749686	I	1e-5	0.250224	1e-5	1e-5	1e-5	1e-5	1e-5	1e-5	0.749686	1e-5	1e-5	FALSE
JU1249	JU1249	1.951	49.126	Île-de-France	France	0.9999	B	1e-5	0.9999	1e-5	1e-5	1e-5	1e-5	1e-5	1e-5	1e-5	1e-5	1e-5	FALSE
WN2002	WN2002	5.694834	51.975285	Gelderland	Netherlands	0.611919	D	1e-5	0.235821	1e-5	0.611919	1e-5	1e-5	0.148065	1e-5	0.004125	1e-5	1e-5	FALSE
QX1233	QX1233	-122.2838	37.8804	California	United States	0.855445	C	1e-5	1e-5	0.855445	0.144465	1e-5	1e-5	1e-5	1e-5	1e-5	1e-5	1e-5	FALSE
QX1215	QX1211	-122.4331	37.7502	California	United States	0.9999	F	1e-5	1e-5	1e-5	1e-5	1e-5	0.9999	1e-5	1e-5	1e-5	1e-5	1e-5	FALSE
QX1213	QX1212	-122.4331	37.7502	California	United States	0.806142	C	0.043174	1e-5	0.806142	1e-5	1e-5	1e-5	1e-5	1e-5	1e-5	1e-5	0.150604	FALSE
DL200	DL200	38.74	9.03	Oromia	Ethiopia	0.736236	I	1e-5	1e-5	1e-5	0.174635	1e-5	1e-5	1e-5	1e-5	0.736236	0.026985	0.062074	FALSE
DL226	DL226	-123.2821	44.5633	Oregon	United States	0.722598	C	1e-5	0.054011	0.722598	0.137152	1e-5	1e-5	1e-5	2e-5	1e-5	0.070261	0.015908	FALSE
JU1395	JU1395	0.04619	47.2199	Pays de la Loire	France	0.746648	D	1e-5	0.25326	1e-5	0.746648	1e-5	1e-5	1e-5	1.2e-5	1e-5	1e-5	1e-5	FALSE
JU1400	JU1400	-5.988	37.3845	Andalucía	Spain	0.38002	J	1e-5	1e-5	1e-5	0.204082	1e-5	1e-5	0.045369	1e-5	0.370459	0.38002	1e-5	FALSE
JU1401	JU1409	-5.6331	37.4721	Andalusia	Spain	0.644812	D	1e-5	1e-5	1e-5	0.644812	1e-5	1e-5	1e-5	1e-5	0.152121	0.202986	1e-5	FALSE
JU1409	JU1409	-5.637	37.468	Andalucía	Spain	0.644812	D	1e-5	1e-5	1e-5	0.644812	1e-5	1e-5	1e-5	1e-5	0.152121	0.202986	1e-5	FALSE
JU1440	JU1440	2.15231	41.41307	Catalunya	Spain	0.687095	D	1e-5	0.006749	1e-5	0.687095	1e-5	1e-5	1e-5	1e-5	0.18064	0.125447	1e-5	FALSE
WN2010	WN2001	6.303406	51.954422	Gelderland	Netherlands	0.670023	K	0.035989	1e-5	1e-5	1e-5	1e-5	1e-5	0.261792	1e-5	0.032126	1e-5	0.670023	FALSE
DL238	DL238	-155.81	19.11	Hawaii	United States	0.999898	A	0.999898	1e-5	1e-5	1e-5	1e-5	1e-5	1e-5	1e-5	1.2e-5	1e-5	1e-5	TRUE
JU1491	JU1491	1.06	46.63	Centre	France	0.635893	J	1e-5	1e-5	1e-5	1e-5	1e-5	1e-5	1e-5	1e-5	0.364017	0.635893	1e-5	FALSE
NIC242	NIC242	-9.31609	38.691765	Lisbon Metropolitan Area	Portugal	0.438872	B	1e-5	0.438872	1e-5	0.044505	1e-5	1e-5	1e-5	1e-5	0.205607	0.310945	1e-5	FALSE
ECA615	JU1581	2.1725	48.7015	Île-de-France	France	0.65758	I	0.067559	0.103112	1e-5	0.171678	1e-5	1e-5	1e-5	1e-5	0.65758	1e-5	1e-5	FALSE
JU1543	JU1543	2.1725	48.7015	Île-de-France	France	0.65206	B	1e-5	0.65206	1e-5	0.34785	1e-5	1e-5	1e-5	1e-5	1e-5	1e-5	1e-5	FALSE
JU1530	JU1530	2.1725	48.7015	Île-de-France	France	0.582604	I	1e-5	1e-5	1e-5	0.417306	1e-5	1e-5	1e-5	1e-5	0.582604	1e-5	1e-5	FALSE
NIC1	NIC1	5.3543	43.279	Provence-Alpes-Côte d'Azur	France	0.537592	D	1e-5	1e-5	1e-5	0.537592	1e-5	1e-5	1e-5	1e-5	0.391043	0.071285	1e-5	FALSE
NIC2	NIC2	5.3543	43.279	Provence-Alpes-Côte d'Azur	France	0.574788	D	1e-5	0.425122	1e-5	0.574788	1e-5	1e-5	1e-5	1e-5	1e-5	1e-5	1e-5	FALSE
NIC4	NIC3	5.3215	43.3636	Provence-Alpes-Côte d'Azur	France	0.484239	I	1e-5	1e-5	0.021269	0.463088	1e-5	1e-5	1e-5	1e-5	0.484239	0.028997	0.002347	FALSE
JU1568	JU1568	2.3862	48.8092	Île-de-France	France	0.9999	B	1e-5	0.9999	1e-5	1e-5	1e-5	1e-5	1e-5	1e-5	1e-5	1e-5	1e-5	FALSE
JU1580	JU1580	2.1725	48.7015	Île-de-France	France	0.9999	I	1e-5	1e-5	1e-5	1e-5	1e-5	1e-5	1e-5	1e-5	0.9999	1e-5	1e-5	FALSE
JU1807	JU1581	2.2131	48.662134	Île-de-France	France	0.65758	I	0.067559	0.103112	1e-5	0.171678	1e-5	1e-5	1e-5	1e-5	0.65758	1e-5	1e-5	FALSE
JU3131	JU323	2.1725	48.7015	Île-de-France	France	0.430619	I	1e-5	1e-5	1e-5	0.372107	1e-5	1e-5	1e-5	1e-5	0.430619	0.197194	1e-5	FALSE
JU1586	JU1586	1.06	46.63	Centre	France	0.861778	B	1e-5	0.861778	1e-5	0.138132	1e-5	1e-5	1e-5	1e-5	1e-5	1e-5	1e-5	FALSE
JU1960	CB4858	-118.131319	34.18973	California	United States	0.9999	C	1e-5	1e-5	0.9999	1e-5	1e-5	1e-5	1e-5	1e-5	1e-5	1e-5	1e-5	FALSE
JU1652	JU1652	-56.19	-34.86	Departamento de Montevideo	Uruguay	0.582993	D	1e-5	0.337599	1e-5	0.582993	1e-5	1e-5	0.079329	1e-5	1e-5	1e-5	1e-5	FALSE
JU1656	JU1213	-3.972104	48.725018	Brittany	France	0.9999	I	1e-5	1e-5	1e-5	1e-5	1e-5	1e-5	1e-5	1e-5	0.9999	1e-5	1e-5	FALSE
JU1666	JU1666	-3.972104	48.725018	Brittany	France	0.976914	I	1e-5	0.022996	1e-5	1e-5	1e-5	1e-5	1e-5	1e-5	0.976914	1e-5	1e-5	FALSE
JU3139	JU1666	-3.81	48.71	Brittany	France	0.976914	I	1e-5	0.022996	1e-5	1e-5	1e-5	1e-5	1e-5	1e-5	0.976914	1e-5	1e-5	FALSE
JU3142	JU792	-3.81	48.71	Brittany	France	0.999897	I	1e-5	1e-5	1e-5	1e-5	1.3e-5	1e-5	1e-5	1e-5	0.999897	1e-5	1e-5	FALSE
JU3140	JU3140	-3.81	48.71	Brittany	France	0.999887	I	1.1e-5	1.4e-5	1e-5	1.1e-5	1e-5	1e-5	1e-5	1e-5	0.999887	1.7e-5	1e-5	FALSE
JU1762	JU1213	-3.790033	48.695548	Brittany	France	0.9999	I	1e-5	1e-5	1e-5	1e-5	1e-5	1e-5	1e-5	1e-5	0.9999	1e-5	1e-5	FALSE
JU1792	JU1792	1.064289	46.63278	Centre-Val de Loire	France	0.689435	B	1e-5	0.689435	1e-5	1e-5	1e-5	1e-5	1e-5	1e-5	0.310475	1e-5	1e-5	FALSE
JU1793	JU1793	1.95114	49.12604	Île-de-France	France	0.9999	I	1e-5	1e-5	1e-5	1e-5	1e-5	1e-5	1e-5	1e-5	0.9999	1e-5	1e-5	FALSE
JU1808	JU1808	2.395372	48.81257	Île-de-France	France	0.685022	K	1e-5	0.135212	2e-5	1e-5	1e-5	1e-5	1e-5	1e-5	0.179676	1e-5	0.685022	FALSE
JU1924	JU2600	1.95114	49.12604	Île-de-France	France	0.997591	I	1e-5	1e-5	1e-5	0.002319	1e-5	1e-5	1e-5	1e-5	0.997591	1e-5	1e-5	FALSE
JU1934	JU1934	1.95114	49.12604	Île-de-France	France	0.897654	I	1e-5	0.102256	1e-5	1e-5	1e-5	1e-5	1e-5	1e-5	0.897654	1e-5	1e-5	FALSE
JU1896	JU1896	23.749673	37.999722	Attica	Greece	0.654548	B	0.031787	0.654548	1e-5	0.313585	1e-5	1e-5	1e-5	1e-5	1e-5	1e-5	1e-5	FALSE
JU2001	JU2001	55.5	-21.1	Saint-Benoît	Reunion	0.524188	I	0.199819	0.025318	1e-5	1e-5	1e-5	1.7e-5	1e-5	1e-5	0.524188	0.250599	1e-5	FALSE
JU2828	JU2829	1.064	46.632	Centre-Val de Loire	France	0.9999	K	1e-5	1e-5	1e-5	1e-5	1e-5	1e-5	1e-5	1e-5	1e-5	1e-5	0.9999	FALSE
JU2007	JU2007	-1.32413	50.7608	England	United Kingdom	0.502314	D	0.018765	1e-5	1e-5	0.502314	1e-5	1e-5	1e-5	1e-5	0.182837	0.214345	0.081678	FALSE
JU2016	JU2016	-122.463177	37.757593	California	United States	0.686517	C	1e-5	1e-5	0.686517	0.313393	1e-5	1e-5	1e-5	1e-5	1e-5	1e-5	1e-5	FALSE
JU2017	JU2017	-122.463177	37.757593	California	United States	0.40346	C	0.130618	0.068426	0.40346	0.272208	1e-5	1e-5	1e-5	1e-5	1e-5	0.085963	0.039275	FALSE
GXW1	GXW1	114.419828	30.542889	Hubei Sheng	China	0.909434	D	1e-5	1e-5	1e-5	0.909434	1e-5	1e-5	1e-5	1e-5	1e-5	0.090476	1e-5	FALSE
QG537	QG536	-122.4415	37.7679	California	United States	0.522272	D	1e-5	1e-5	0.089958	0.522272	1e-5	1e-5	1e-5	1e-5	1e-5	0.38769	1e-5	FALSE
QX1791	QX1791	-156.3935	20.6344	Hawaii	United States	0.559108	A	0.559108	0.107565	0.137053	1e-5	0.061847	1e-5	1e-5	1e-5	1e-5	1e-5	0.134366	TRUE
QX1792	QX1792	-156.35475	20.70554	Hawaii	United States	0.617955	E	1e-5	1e-5	1e-5	0.220457	0.617955	1e-5	1e-5	1e-5	1e-5	0.161508	1e-5	TRUE
QX1793	QX1793	-156.35678	20.70559	Hawaii	United States	0.875683	E	1e-5	1e-5	1e-5	1e-5	0.875683	1e-5	1e-5	1.2e-5	1e-5	0.124224	1e-5	TRUE
QX1794	QX1794	-156.35678	20.70559	Hawaii	United States	0.855294	E	1e-5	1e-5	0.10701	0.037616	0.855294	1e-5	1e-5	1e-5	1e-5	1e-5	1e-5	TRUE
NIC199	NIC199	-25.19929	37.745428	Azores	Portugal	0.467578	G	0.133143	1e-5	1e-5	1e-5	1e-5	1e-5	0.467578	1e-5	0.27033	0.128879	1e-5	FALSE
NIC200	NIC199	-25.66489	37.74942	Azores	Portugal	0.467578	G	0.133143	1e-5	1e-5	1e-5	1e-5	1e-5	0.467578	1e-5	0.27033	0.128879	1e-5	FALSE
QG558	QG556	-119.702021	34.421629	California	United States	0.860267	C	1e-5	1e-5	0.860267	1e-5	0.139643	1e-5	1e-5	1e-5	1e-5	1e-5	1e-5	FALSE
QG557	QG557	-119.702021	34.421629	California	United States	0.9999	C	1e-5	1e-5	0.9999	1e-5	1e-5	1e-5	1e-5	1e-5	1e-5	1e-5	1e-5	FALSE
MY518	MY518	7.611719	51.964154	North Rhine-Westphalia	Germany	0.452711	K	1e-5	1e-5	0.412856	0.069194	1e-5	1e-5	1e-5	1e-5	1e-5	0.065168	0.452711	FALSE
JU2106	JU2106	0.239824	43.606266	Occitanie	France	0.845197	I	0.0127	0.142023	1e-5	1e-5	1e-5	1e-5	1e-5	1e-5	0.845197	1e-5	1e-5	FALSE
JU2131	JU2131	-4.705	48.0497	Brittany	France	0.831556	I	1e-5	0.034485	1e-5	1e-5	1e-5	1e-5	1e-5	1e-5	0.831556	0.133879	1e-5	FALSE
NIC195	NIC195	-28.37322	38.545874	Azores	Portugal	0.314001	J	0.240886	0.129079	1e-5	0.01215	1e-5	1e-5	0.274649	1e-5	0.029185	0.314001	1e-5	FALSE
NIC196	NIC195	-28.20149	38.4716405	Azores	Portugal	0.314001	J	0.240886	0.129079	1e-5	0.01215	1e-5	1e-5	0.274649	1e-5	0.029185	0.314001	1e-5	FALSE
NIC197	NIC195	-28.25165	38.39682	Azores	Portugal	0.314001	J	0.240886	0.129079	1e-5	0.01215	1e-5	1e-5	0.274649	1e-5	0.029185	0.314001	1e-5	FALSE
MY538	MY795	10.117737	54.346355	Schleswig-Holstein	Germany	0.97746	K	1e-5	0.02245	1e-5	1e-5	1e-5	1e-5	1e-5	1e-5	1e-5	1e-5	0.97746	FALSE
MY589	MY920	10.117737	54.346355	Schleswig-Holstein	Germany	0.804639	D	1e-5	1e-5	1e-5	0.804639	1e-5	1e-5	1e-5	1e-5	0.195271	1e-5	1e-5	FALSE
NIC198	NIC195	-31.23849	39.4364016	Azores	Portugal	0.314001	J	0.240886	0.129079	1e-5	0.01215	1e-5	1e-5	0.274649	1e-5	0.029185	0.314001	1e-5	FALSE
MY561	MY2453	7.536628	51.950777	North Rhine-Westphalia	Germany	0.509916	B	1e-5	0.509916	1e-5	0.10959	1e-5	1e-5	1e-5	1e-5	0.235805	0.086836	0.057793	FALSE
MY559	MY2573	7.599099	51.950723000000004	North Rhine-Westphalia	Germany	0.659791	I	1e-5	0.340119	1e-5	1e-5	1e-5	1e-5	1e-5	1e-5	0.659791	1e-5	1e-5	FALSE
NIC207	NIC207	7.24045	43.720505	Provence-Alpes-Côte d'Azur	France	0.670979	D	1e-5	0.046455	1e-5	0.670979	1e-5	1.1e-5	1e-5	1e-5	0.201677	0.080818	1e-5	FALSE
MY684	RC301	10.117737	54.346355	Schleswig-Holstein	Germany	0.9999	D	1e-5	1e-5	1e-5	0.9999	1e-5	1e-5	1e-5	1e-5	1e-5	1e-5	1e-5	FALSE
MY679	MY679	10.117737	54.346355	Schleswig-Holstein	Germany	0.809122	D	1e-5	1e-5	1e-5	0.809122	1e-5	1e-5	1e-5	1e-5	1e-5	0.190788	1e-5	FALSE
MY772	MY772	10.117737	54.346355	Schleswig-Holstein	Germany	0.707546	I	1e-5	0.007009	1e-5	0.285364	1e-5	1e-5	1e-5	1e-5	0.707546	1e-5	1e-5	FALSE
JU3132	JU3132	2.1725	48.7015	Île-de-France	France	0.9999	I	1e-5	1e-5	1e-5	1e-5	1e-5	1e-5	1e-5	1e-5	0.9999	1e-5	1e-5	FALSE
JU2139	JU1793	1.064289	46.63278	Centre-Val de Loire	France	0.9999	I	1e-5	1e-5	1e-5	1e-5	1e-5	1e-5	1e-5	1e-5	0.9999	1e-5	1e-5	FALSE
JU2141	JU2141	1.0512	46.6293	Centre-Val de Loire	France	0.780312	I	1e-5	0.219596	1e-5	1e-5	1.1e-5	1.1e-5	1e-5	1e-5	0.780312	1e-5	1e-5	FALSE
JU2151	JU2600	1.951	49.121	Île-de-France	France	0.997591	I	1e-5	1e-5	1e-5	0.002319	1e-5	1e-5	1e-5	1e-5	0.997591	1e-5	1e-5	FALSE
MY803	MY2713	10.117737	54.346355	Schleswig-Holstein	Germany	0.999899	D	1e-5	1e-5	1e-5	0.999899	1e-5	1e-5	1.1e-5	1e-5	1e-5	1e-5	1e-5	FALSE
JU3138	JU2600	1.9595	49.1269	Île-de-France	France	0.997591	I	1e-5	1e-5	1e-5	0.002319	1e-5	1e-5	1e-5	1e-5	0.997591	1e-5	1e-5	FALSE
JU3133	JU1440	2.1725	48.7015	Île-de-France	France	0.687095	D	1e-5	0.006749	1e-5	0.687095	1e-5	1e-5	1e-5	1e-5	0.18064	0.125447	1e-5	FALSE
JU3134	JU3134	2.1725	48.7015	Île-de-France	France	0.76489	D	1e-5	0.016018	1e-5	0.76489	1e-5	1e-5	1e-5	1e-5	0.133263	0.085759	1e-5	FALSE
MY864	MY2453	7.599099	51.950723000000004	North Rhine-Westphalia	Germany	0.509916	B	1e-5	0.509916	1e-5	0.10959	1e-5	1e-5	1e-5	1e-5	0.235805	0.086836	0.057793	FALSE
NIC232	NIC231	7.24045	43.720505	Provence-Alpes-Côte d'Azur	France	0.760836	D	1e-5	1e-5	1e-5	0.760836	0.045083	1e-5	1e-5	1e-5	1e-5	0.194002	1e-5	FALSE
NIC237	NIC236	-9.313417	39.242006	Lisboa	Portugal	0.954727	J	1e-5	1e-5	1e-5	1e-5	1e-5	1e-5	1e-5	1e-5	0.045183	0.954727	1e-5	FALSE
MY881	MY2535	7.599099	51.950723000000004	North Rhine-Westphalia	Germany	0.756458	D	1e-5	1e-5	1e-5	0.756458	1e-5	1e-5	1e-5	1e-5	0.072714	0.170748	1e-5	FALSE
BRC20067	BRC20067	121.169736	24.072954	Taiwan	Taiwan	0.999899	D	1e-5	1e-5	1e-5	0.999899	1e-5	1e-5	1e-5	1e-5	1.1e-5	1e-5	1e-5	FALSE
NIC251	NIC251	-28.151364	38.66621	Azores	Portugal	0.699168	G	0.253162	0.04759	1e-5	1e-5	1e-5	1e-5	0.699168	1e-5	1e-5	1e-5	1e-5	FALSE
NIC252	NIC252	-28.147949	38.661313	Azores	Portugal	0.931756	J	0.068154	1e-5	1e-5	1e-5	1e-5	1e-5	1e-5	1e-5	1e-5	0.931756	1e-5	FALSE
MY2109	MY2741	10.117737	54.346355	Schleswig-Holstein	Germany	0.666187	K	1e-5	1e-5	1e-5	0.333723	1e-5	1e-5	1e-5	1e-5	1e-5	1e-5	0.666187	FALSE
MY2143	MY2147	10.117737	54.346355	Schleswig-Holstein	Germany	0.490751	B	1e-5	0.490751	1e-5	0.096592	1e-5	1e-5	1e-5	1e-5	0.412577	1e-5	1e-5	FALSE
MY2208	MY2573	10.117737	54.346355	Schleswig-Holstein	Germany	0.659791	I	1e-5	0.340119	1e-5	1e-5	1e-5	1e-5	1e-5	1e-5	0.659791	1e-5	1e-5	FALSE
MY2212	MY2212	10.117737	54.346355	Schleswig-Holstein	Germany	0.730147	D	1e-5	1e-5	1e-5	0.730147	1e-5	1e-5	1e-5	1e-5	0.122791	1e-5	0.146982	FALSE
JU2234	JU2234	-1.583	47.227	Pays de la Loire	France	0.551605	B	1.58e-4	0.551605	1e-5	0.404098	1e-5	1e-5	0.044068	1e-5	1e-5	1e-5	1e-5	FALSE
JU2250	JU2250	-1.891389	48.285278	Brittany	France	0.999892	I	1e-5	1e-5	1e-5	1e-5	1.8e-5	1e-5	1e-5	1e-5	0.999892	1e-5	1e-5	FALSE
NIC255	NIC255	7.266779	43.714834	Provence-Alpes-Côte d'Azur	France	0.679449	D	1e-5	0.207636	1e-5	0.679449	1e-5	1e-5	1e-5	1e-5	0.112835	1e-5	1e-5	FALSE
MY2481	JU311	10.117737	54.346355	Schleswig-Holstein	Germany	0.782558	B	1e-5	0.782558	1e-5	0.065245	1e-5	1e-5	1e-5	1e-5	0.140303	1e-5	0.011824	FALSE
NIC263	NIC256	-9.14875	38.71829	Lisbon Metropolitan Area	Portugal	0.641916	G	1e-5	1e-5	1e-5	1e-5	1e-5	1e-5	0.641916	1e-5	1e-5	0.357994	1e-5	FALSE
NIC258	NIC258	-9.14875	38.71829	Lisbon Metropolitan Area	Portugal	0.999897	G	1e-5	1e-5	1e-5	1e-5	1e-5	1e-5	0.999897	1e-5	1.3e-5	1e-5	1e-5	FALSE
NIC259	NIC259	-9.14875	38.71829	Lisbon Metropolitan Area	Portugal	0.537535	J	1e-5	0.12168	1e-5	1e-5	1e-5	1e-5	0.175711	1e-5	0.165003	0.537535	1e-5	FALSE
NIC260	NIC260	-9.14875	38.71829	Lisbon Metropolitan Area	Portugal	0.701671	G	1e-5	1e-5	1e-5	0.066757	1.5e-5	1e-5	0.701671	1e-5	1e-5	0.231487	1e-5	FALSE
NIC261	NIC261	-9.14875	38.71829	Lisbon Metropolitan Area	Portugal	0.9999	G	1e-5	1e-5	1e-5	1e-5	1e-5	1e-5	0.9999	1e-5	1e-5	1e-5	1e-5	FALSE
NIC262	NIC262	-9.14875	38.71829	Lisbon Metropolitan Area	Portugal	0.871335	G	1e-5	1e-5	1e-5	1e-5	1e-5	1e-5	0.871335	1e-5	1e-5	0.128575	1e-5	FALSE
NIC265	NIC265	-9.14875	38.71829	Lisbon Metropolitan Area	Portugal	0.999899	G	1e-5	1e-5	1e-5	1.1e-5	1e-5	1e-5	0.999899	1e-5	1e-5	1e-5	1e-5	FALSE
MY2532	MY2535	10.117737	54.346355	Schleswig-Holstein	Germany	0.756458	D	1e-5	1e-5	1e-5	0.756458	1e-5	1e-5	1e-5	1e-5	0.072714	0.170748	1e-5	FALSE
MY2530	MY2530	10.117737	54.346355	Schleswig-Holstein	Germany	0.780637	D	1e-5	1e-5	1e-5	0.780637	1e-5	1e-5	1e-5	1e-5	0.179515	0.039768	1e-5	FALSE
NIC270	NIC267	-9.31592	38.69237	Lisbon Metropolitan Area	Portugal	0.785544	J	1e-5	1e-5	1e-5	0.214366	1e-5	1e-5	1e-5	1e-5	1e-5	0.785544	1e-5	FALSE
NIC266	NIC266	-9.31592	38.69237	Lisbon Metropolitan Area	Portugal	0.671094	J	0.028665	0.252131	1e-5	1e-5	1e-5	1e-5	0.04804	1e-5	1e-5	0.671094	1e-5	FALSE
NIC268	NIC268	-9.31592	38.69237	Lisbon Metropolitan Area	Portugal	0.452486	J	0.368281	1e-5	0.049807	1e-5	0.048434	1e-5	1e-5	1e-5	1e-5	0.452486	0.080932	FALSE
NIC269	NIC269	-9.31592	38.69237	Lisbon Metropolitan Area	Portugal	0.836765	J	1e-5	1e-5	1e-5	1e-5	1e-5	1e-5	1e-5	1.1e-5	0.163144	0.836765	1e-5	FALSE
NIC271	NIC271	-9.31592	38.69237	Lisbon Metropolitan Area	Portugal	0.691917	G	1e-5	1e-5	1e-5	1e-5	1e-5	1e-5	0.691917	1e-5	1e-5	0.307993	1e-5	FALSE
NIC273	NIC272	-8.756356	39.769459	Leiria District	Portugal	0.968573	J	1e-5	1e-5	1e-5	1e-5	1.1e-5	1e-5	1e-5	1e-5	0.031337	0.968573	1e-5	FALSE
NIC274	NIC274	-8.756356	39.769459	Leiria District	Portugal	0.9999	J	1e-5	1e-5	1e-5	1e-5	1e-5	1e-5	1e-5	1e-5	1e-5	0.9999	1e-5	FALSE
NIC275	NIC275	-8.756356	39.769459	Leiria District	Portugal	0.830526	J	1e-5	1e-5	1e-5	0.169383	1e-5	1e-5	1.1e-5	1e-5	1e-5	0.830526	1e-5	FALSE
NIC276	NIC276	-8.756356	39.769459	Leiria District	Portugal	0.9999	J	1e-5	1e-5	1e-5	1e-5	1e-5	1e-5	1e-5	1e-5	1e-5	0.9999	1e-5	FALSE
MY2585	MY2585	10.117737	54.346355	Schleswig-Holstein	Germany	0.999897	D	1e-5	1e-5	1e-5	0.999897	1e-5	1e-5	1.3e-5	1e-5	1e-5	1e-5	1e-5	FALSE
NIC277	NIC277	7.266138	43.716441	Provence-Alpes-Côte d'Azur	France	0.604955	I	1e-5	1e-5	1e-5	0.394955	1e-5	1e-5	1e-5	1e-5	0.604955	1e-5	1e-5	FALSE
JU2460	JU792	-3.9251	48.6934	Bretagne	France	0.999897	I	1e-5	1e-5	1e-5	1e-5	1.3e-5	1e-5	1e-5	1e-5	0.999897	1e-5	1e-5	FALSE
JU2467	JU2464	-72.525	-13.155	Cusco	Peru	0.626128	D	1e-5	1e-5	1e-5	0.626128	1e-5	1e-5	1e-5	1e-5	0.144591	0.2292	1e-5	FALSE
JU2466	JU2466	-72.266	-13.257	Cusco	Peru	0.9999	D	1e-5	1e-5	1e-5	0.9999	1e-5	1e-5	1e-5	1e-5	1e-5	1e-5	1e-5	FALSE
JU2593	JU2593	2.222334	48.822556	Île-de-France	France	0.9999	K	1e-5	1e-5	1e-5	1e-5	1e-5	1e-5	1e-5	1e-5	1e-5	1e-5	0.9999	FALSE
JU2478	JU2478	4.351	50.85	Brussels	Belgium	0.377106	I	1e-5	1e-5	0.344298	0.278516	1e-5	1e-5	1e-5	1e-5	0.377106	1e-5	1e-5	FALSE
QG2075	QG2075	-83.376	33.951	Georgia	United States	0.386104	K	0.043366	0.007539	0.097807	0.24636	1e-5	1e-5	0.07614	1e-5	1e-5	0.142644	0.386104	FALSE
QW947	QW947	-70.6106	-33.4213	Santiago Metropolitan Region	Chile	0.519928	D	1e-5	1e-5	1e-5	0.519928	1e-5	0.048502	0.172277	1e-5	0.259223	1e-5	1e-5	FALSE
JU2513	JU2513	22.0736	38.26016	Peloponnisos Dytiki Ellada ke Ionio	Greece	0.865712	D	1e-5	0.072771	1e-5	0.865712	1e-5	1e-5	1e-5	1e-5	0.020539	0.040909	1e-5	FALSE
JU2534	JU2534	0.097087	49.357921	Normandy	France	0.553552	D	1e-5	1e-5	1e-5	0.553552	1e-5	1e-5	1e-5	1e-5	0.446358	1e-5	1e-5	FALSE
ECA36	ECA36	174.745529	-36.893333	Auckland	New Zealand	0.999888	F	1.3e-5	1.9e-5	1e-5	1e-5	1e-5	0.999888	1e-5	1e-5	1e-5	1e-5	1e-5	FALSE
MY2691	RC301	10.11505	54.3491	Schleswig-Holstein	Germany	0.9999	D	1e-5	1e-5	1e-5	0.9999	1e-5	1e-5	1e-5	1e-5	1e-5	1e-5	1e-5	FALSE
MY2623	MY2585	10.11505	54.3491	Schleswig-Holstein	Germany	0.999897	D	1e-5	1e-5	1e-5	0.999897	1e-5	1e-5	1.3e-5	1e-5	1e-5	1e-5	1e-5	FALSE
JU2287	JU2257	1.1	46.6	Centre-Val de Loire	France	0.9999	B	1e-5	0.9999	1e-5	1e-5	1e-5	1e-5	1e-5	1e-5	1e-5	1e-5	1e-5	FALSE
MY2693	MY2693	10.11505	54.3491	Schleswig-Holstein	Germany	0.960228	D	1e-5	1e-5	1e-5	0.960228	1e-5	1e-5	1e-5	1e-5	1e-5	1e-5	0.039682	FALSE
MY2692	MY2741	10.11505	54.3491	Schleswig-Holstein	Germany	0.666187	K	1e-5	1e-5	1e-5	0.333723	1e-5	1e-5	1e-5	1e-5	1e-5	1e-5	0.666187	FALSE
JU2527	JU792	-3.5999	47.8797	Brittany	France	0.999897	I	1e-5	1e-5	1e-5	1e-5	1.3e-5	1e-5	1e-5	1e-5	0.999897	1e-5	1e-5	FALSE
MY2689	MY2713	10.11505	54.3491	Schleswig-Holstein	Germany	0.999899	D	1e-5	1e-5	1e-5	0.999899	1e-5	1e-5	1.1e-5	1e-5	1e-5	1e-5	1e-5	FALSE
MY2688	MY920	10.11505	54.3491	Schleswig-Holstein	Germany	0.804639	D	1e-5	1e-5	1e-5	0.804639	1e-5	1e-5	1e-5	1e-5	0.195271	1e-5	1e-5	FALSE
JU2316	JU2316	-9.1486	38.7175	Lisbon	Portugal	0.999899	G	1e-5	1e-5	1e-5	1e-5	1e-5	1e-5	0.999899	1e-5	1.1e-5	1e-5	1e-5	FALSE
JU2519	JU2519	-9.1486	38.7175	Lisbon	Portugal	0.713829	G	1e-5	1.7e-5	1e-5	1e-5	1e-5	1e-5	0.713829	1e-5	1e-5	0.286074	1e-5	FALSE
JU2522	JU2522	-9.1486	38.7175	Lisbon	Portugal	0.9999	J	1e-5	1e-5	1e-5	1e-5	1e-5	1e-5	1e-5	1e-5	1e-5	0.9999	1e-5	FALSE
JU2526	JU2526	-9.1486	38.7175	Lisbon	Portugal	0.999899	G	1.1e-5	1e-5	1e-5	1.1e-5	1e-5	1e-5	0.999899	1e-5	1e-5	1e-5	1e-5	FALSE
CX11307	CX11307	-118.10987	34.12946	California	United States	0.59957	C	1e-5	1e-5	0.59957	0.183651	1e-5	1e-5	0.038083	1e-5	0.070271	0.057709	0.050666	FALSE
CX11315	CX11315	-118.10987	34.12946	California	United States	0.855784	C	1e-5	1e-5	0.855784	0.144126	1e-5	1e-5	1e-5	1e-5	1e-5	1e-5	1e-5	FALSE
NIC501	NIC501	2.2675	48.77302	Île-de-France	France	0.9999	I	1e-5	1e-5	1e-5	1e-5	1e-5	1e-5	1e-5	1e-5	0.9999	1e-5	1e-5	FALSE
JU2572	JU2572	2.395372	48.81257	Île-de-France	France	0.709448	B	1e-5	0.709448	1e-5	1e-5	1e-5	1e-5	1e-5	1e-5	0.290462	1e-5	1e-5	FALSE
JU2566	JU2566	2.44599	48.83886	Île-de-France	France	0.770245	B	1e-5	0.770245	1e-5	0.113902	1e-5	1e-5	1e-5	1e-5	0.115773	1e-5	1e-5	FALSE
JU2565	JU2565	1.066213	44.958394	Nouvelle-Aquitaine	France	0.9999	B	1e-5	0.9999	1e-5	1e-5	1e-5	1e-5	1e-5	1e-5	1e-5	1e-5	1e-5	FALSE
JU2575	JU2575	3.0707	49.0857	Île-de-France	France	0.83492	B	1e-5	0.83492	1.5e-5	1e-5	1e-5	1e-5	1e-5	1.3e-5	0.164982	1e-5	1e-5	FALSE
JU2576	JU2576	3.072	49.0861	Île-de-France	France	0.554878	I	0.091793	0.015965	1e-5	0.336444	1e-5	1e-5	1e-5	1e-5	0.554878	1e-5	8.6e-4	FALSE
JU2578	JU2578	2.4315	48.87613	Île-de-France	France	0.542414	J	1e-5	1e-5	1e-5	0.457496	1e-5	1e-5	1e-5	1e-5	1e-5	0.542414	1e-5	FALSE
JU3135	JU3135	2.1725	48.7015	Île-de-France	France	0.999892	D	1.6e-5	1.2e-5	1e-5	0.999892	1e-5	1e-5	1e-5	1e-5	1e-5	1e-5	1e-5	FALSE
JU2581	JU2581	1.1	46.6	Centre-Val de Loire	France	0.9999	K	1e-5	1e-5	1e-5	1e-5	1e-5	1e-5	1e-5	1e-5	1e-5	1e-5	0.9999	FALSE
JU2587	JU2587	3.872016	45.026713	Auvergne-Rhône-Alpes	France	0.791614	K	1e-5	1e-5	1e-5	0.1127	1e-5	1e-5	1e-5	1e-5	0.095606	1e-5	0.791614	FALSE
JU2586	JU2586	2.159	48.897	Île-de-France	France	0.655669	J	1e-5	1e-5	1e-5	0.154338	1e-5	1e-5	0.112716	1e-5	0.077208	0.655669	1e-5	FALSE
JU2592	JU2592	-2.403836	48.628558	Brittany	France	0.816724	B	1e-5	0.816724	1e-5	1e-5	1e-5	1e-5	0.022935	1e-5	0.091148	0.069123	1e-5	FALSE
JU3136	MY2453	2.1725	48.7015	Île-de-France	France	0.509916	B	1e-5	0.509916	1e-5	0.10959	1e-5	1e-5	1e-5	1e-5	0.235805	0.086836	0.057793	FALSE
JU2570	JU2570	-0.2685	46.2657	Nouvelle-Aquitaine	France	0.999889	I	1.2e-5	1.1e-5	1e-5	1e-5	1e-5	1e-5	1e-5	1e-5	0.999889	1.9e-5	1e-5	FALSE
NIC508	MY2535	14.261756	40.86183	Campania	Italy	0.756458	D	1e-5	1e-5	1e-5	0.756458	1e-5	1e-5	1e-5	1e-5	0.072714	0.170748	1e-5	FALSE
NIC512	MY2535	14.2623855	40.8625	Campania	Italy	0.756458	D	1e-5	1e-5	1e-5	0.756458	1e-5	1e-5	1e-5	1e-5	0.072714	0.170748	1e-5	FALSE
NIC511	NIC511	14.2623855	40.8625	Campania	Italy	0.664857	D	1e-5	1e-5	1e-5	0.664857	1e-5	1e-5	1e-5	1e-5	0.335053	1e-5	1e-5	FALSE
JU2604	JU1793	1.86175	49.16477	Île-de-France	France	0.9999	I	1e-5	1e-5	1e-5	1e-5	1e-5	1e-5	1e-5	1e-5	0.9999	1e-5	1e-5	FALSE
JU2605	JU1793	1.86	49.166	Île-de-France	France	0.9999	I	1e-5	1e-5	1e-5	1e-5	1e-5	1e-5	1e-5	1e-5	0.9999	1e-5	1e-5	FALSE
JU2600	JU2600	1.9496	49.1242	Île-de-France	France	0.997591	I	1e-5	1e-5	1e-5	0.002319	1e-5	1e-5	1e-5	1e-5	0.997591	1e-5	1e-5	FALSE
JU2610	JU2610	1.7915	49.1075	Île-de-France	France	0.996153	I	1e-5	1e-5	1e-5	0.003757	1e-5	1e-5	1e-5	1e-5	0.996153	1e-5	1e-5	FALSE
NIC513	NIC513	-9.167136	38.776038	Lisbon	Portugal	0.9999	J	1e-5	1e-5	1e-5	1e-5	1e-5	1e-5	1e-5	1e-5	1e-5	0.9999	1e-5	FALSE
NIC514	NIC514	-9.167136	38.776038	Lisbon	Portugal	0.999892	J	1e-5	1e-5	1.8e-5	1e-5	1e-5	1e-5	1e-5	1e-5	1e-5	0.999892	1e-5	FALSE
NIC515	NIC515	-9.165884	38.776775	Lisbon	Portugal	0.417336	J	1e-5	1e-5	1e-5	0.334146	1e-5	1e-5	0.051678	1e-5	0.196771	0.417336	1e-5	FALSE
JU2619	JU2619	-117.275428	32.998352	California	United States	0.674056	D	1e-5	1e-5	0.177774	0.674056	1e-5	1e-5	1e-5	1e-5	1e-5	0.148089	1e-5	FALSE
NIC521	NIC527	-6.304441	36.535679	Andalusia	Spain	0.624523	I	1e-5	0.027725	1e-5	0.154581	1e-5	1e-5	0.036296	1e-5	0.624523	0.156816	1e-5	FALSE
NIC522	NIC522	-6.304441	36.535679	Andalusia	Spain	0.420282	D	1e-5	0.094386	1e-5	0.420282	1e-5	1e-5	0.050353	1e-5	0.198222	0.236696	1e-5	FALSE
NIC523	NIC523	-6.29831	36.535679	Andalusia	Spain	0.463138	D	1e-5	1e-5	1e-5	0.463138	0.143358	1.4e-5	0.020281	1e-5	1e-5	0.373149	1e-5	FALSE
NIC526	NIC526	-6.304441	36.535679	Andalusia	Spain	0.327151	J	1e-5	1e-5	1e-5	0.268203	1e-5	1e-5	0.079686	1e-5	0.14343	0.327151	0.18147	FALSE
NIC528	NIC528	-6.29831	36.535679	Andalusia	Spain	0.762944	D	1e-5	1e-5	1e-5	0.762944	1e-5	1e-5	1e-5	1e-5	0.062372	0.174604	1e-5	FALSE
NIC529	NIC529	-4.784967	37.870754	Andalusia	Spain	0.685008	D	1e-5	0.069957	1e-5	0.685008	1e-5	1e-5	1e-5	1e-5	0.070933	0.174032	1e-5	FALSE
BRC20113	BRC20067	121.283056	24.124167	Taiwan	Taiwan	0.999899	D	1e-5	1e-5	1e-5	0.999899	1e-5	1e-5	1e-5	1e-5	1.1e-5	1e-5	1e-5	FALSE
BRC20231	MY23	120.908112	23.541517	Taiwan Province	Taiwan	0.510437	E	1e-5	1e-5	1e-5	1e-5	0.510437	1e-5	1e-5	1e-5	1e-5	1e-5	0.489473	FALSE
ECA190	ECA189	-155.2225	19.423889	Hawaii	United States	0.842304	E	1e-5	1e-5	0.157606	1e-5	0.842304	1e-5	1e-5	1e-5	1e-5	1e-5	1e-5	TRUE
ECA192	ECA189	-155.221944	19.424444	Hawaii	United States	0.842304	E	1e-5	1e-5	0.157606	1e-5	0.842304	1e-5	1e-5	1e-5	1e-5	1e-5	1e-5	TRUE
ECA191	ECA191	-155.221944	19.424167	Hawaii	United States	0.9999	H	1e-5	1e-5	1e-5	1e-5	1e-5	1e-5	1e-5	0.9999	1e-5	1e-5	1e-5	TRUE
BRC20263	BRC20263	151.2069889	-33.86748611	New South Wales	Australia	0.493992	D	0.142338	1e-5	0.019301	0.493992	1e-5	1e-5	1e-5	1e-5	1e-5	0.344299	1e-5	FALSE
JU2800	JU2800	2.331	48.79	Île-de-France	France	0.467065	B	1e-5	0.467065	1e-5	0.159944	1e-5	1e-5	1e-5	1e-5	0.372911	1e-5	1e-5	FALSE
JU2802	JU2800	2.14167	48.9067	Île-de-France	France	0.467065	B	1e-5	0.467065	1e-5	0.159944	1e-5	1e-5	1e-5	1e-5	0.372911	1e-5	1e-5	FALSE
JU2811	JU2811	151.219453	-33.8632	New South Wales	Australia	0.454041	D	0.192454	1e-5	0.017396	0.454041	1e-5	1e-5	0.164015	1.4e-5	1e-5	0.17203	1e-5	FALSE
XZ1513	XZ1513	-159.63105	22.14787	Hawaii	United States	0.843273	E	1e-5	1e-5	0.156637	1e-5	0.843273	1e-5	1e-5	1e-5	1e-5	1e-5	1e-5	TRUE
NIC1049	NIC1049	1.45032	43.593561	Occitanie	France	0.593461	I	1e-5	0.381514	1e-5	0.024945	1e-5	1e-5	1e-5	1e-5	0.593461	1e-5	1e-5	FALSE
XZ1514	XZ1514	-159.668	22.149	Hawaii	United States	0.999894	F	1e-5	1.2e-5	1e-5	1e-5	1e-5	0.999894	1e-5	1e-5	1.3e-5	1e-5	1e-5	TRUE
XZ1515	XZ1515	-159.668	22.149	Hawaii	United States	0.569182	E	1e-5	1e-5	0.334387	1e-5	0.569182	0.096351	1e-5	1e-5	1e-5	1e-5	1e-5	TRUE
XZ1516	XZ1516	-159.668	22.149	Hawaii	United States	0.624136	F	0.174719	1e-5	1e-5	1e-5	1e-5	0.624136	1e-5	0.201065	1e-5	1e-5	1e-5	TRUE
JU3137	JU3137	2.1725	48.7015	Île-de-France	France	0.41168	J	1e-5	0.162265	1e-5	0.090919	0.044108	1e-5	1e-5	1e-5	0.290968	0.41168	1e-5	FALSE
WN2035	WN2033	5.694	51.975	Gelderland	Netherlands	0.504377	K	1e-5	1e-5	1e-5	0.495533	1e-5	1e-5	1e-5	1e-5	1e-5	1e-5	0.504377	FALSE
WN2056	WN2050	5.717	51.975	Gelderland	Netherlands	0.60703	I	0.004214	0.388676	1e-5	1e-5	1e-5	1e-5	1e-5	1e-5	0.60703	1e-5	1e-5	FALSE
JU2825	JU2825	2.3862	48.8092	Île-de-France	France	0.9999	B	1e-5	0.9999	1e-5	1e-5	1e-5	1e-5	1e-5	1e-5	1e-5	1e-5	1e-5	FALSE
NIC1107	NIC1107	7.266935	43.716278	Provence-Alpes-Côte d'Azur	France	0.794023	B	1e-5	0.794023	1.2e-5	1e-5	1e-5	1e-5	1e-5	1e-5	0.205885	1e-5	1e-5	FALSE
JU2838	JU2838	-97.98832	20.205961	Puebla	Mexico	0.547199	J	0.072467	1e-5	0.048379	1e-5	1e-5	1e-5	1e-5	1e-5	1e-5	0.547199	0.331886	FALSE
JU2841	JU2841	176	-40		New Zealand	0.605505	D	0.091283	1e-5	1e-5	0.605505	1e-5	1e-5	1e-5	1e-5	0.303132	1e-5	1e-5	FALSE
JU2853	JU2853	-7.545	41.19	Vila Real District	Portugal	0.379173	D	1e-5	0.254208	1e-5	0.379173	1e-5	1e-5	1e-5	1e-5	1e-5	0.366539	1e-5	FALSE
JU2860	JU1200	0.115365	52.19842	England	United Kingdom	0.682998	B	1e-5	0.682998	1e-5	0.316912	1e-5	1e-5	1e-5	1e-5	1e-5	1e-5	1e-5	FALSE
JU2862	JU2862	0.1264	52.1944	England	United Kingdom	0.426445	C	1e-5	0.003358	0.426445	0.334683	1e-5	1e-5	0.030298	1e-5	0.135274	0.069892	1e-5	FALSE
JU2866	JU2866	-118.4409	34.0751	California	United States	0.9999	C	1e-5	1e-5	0.9999	1e-5	1e-5	1e-5	1e-5	1e-5	1e-5	1e-5	1e-5	FALSE
JU2878	JU2878	-99.098769	19.29732	Mexico City	Mexico	0.617716	D	1e-5	1e-5	0.18473	0.617716	1e-5	1e-5	1e-5	1e-5	1e-5	0.197475	1e-5	FALSE
JU2879	JU2879	-99.098769	19.29732	Mexico City	Mexico	0.416813	K	1e-5	1e-5	0.298322	0.076059	0.208736	1e-5	1e-5	1e-5	1e-5	1e-5	0.416813	FALSE
JU2908	JU2907	11.2839	43.8063	Tuscany	Italy	0.520035	B	1e-5	0.520035	1e-5	0.479872	1e-5	1e-5	1.3e-5	1e-5	1e-5	1e-5	1e-5	FALSE
JU2906	JU2906	11.2806	43.8023	Tuscany	Italy	0.520081	D	1e-5	0.215485	1e-5	0.520081	1e-5	1e-5	1e-5	1e-5	0.264353	1e-5	1e-5	FALSE
JU2907	JU2907	11.2906	43.8021	Tuscany	Italy	0.520035	B	1e-5	0.520035	1e-5	0.479872	1e-5	1e-5	1.3e-5	1e-5	1e-5	1e-5	1e-5	FALSE
ECA348	ECA348	-122.253889	37.775334	California	United States	0.9999	C	1e-5	1e-5	0.9999	1e-5	1e-5	1e-5	1e-5	1e-5	1e-5	1e-5	1e-5	FALSE
ECA350	ECA349	-117.235442	32.765353	California	United States	0.9999	C	1e-5	1e-5	0.9999	1e-5	1e-5	1e-5	1e-5	1e-5	1e-5	1e-5	1e-5	FALSE
ECA349	ECA349	-117.236741	32.765758	California	United States	0.9999	C	1e-5	1e-5	0.9999	1e-5	1e-5	1e-5	1e-5	1e-5	1e-5	1e-5	1e-5	FALSE
ECA363	ECA363	-156.304444	20.723611	Hawaii	United States	0.9999	F	1e-5	1e-5	1e-5	1e-5	1e-5	0.9999	1e-5	1e-5	1e-5	1e-5	1e-5	TRUE
ECA369	ECA369	-157.006389	21.175556	Hawaii	United States	0.9999	A	0.9999	1e-5	1e-5	1e-5	1e-5	1e-5	1e-5	1e-5	1e-5	1e-5	1e-5	TRUE
ECA372	ECA372	-159.664444	22.121667	Hawaii	United States	0.766152	E	1.8e-5	1e-5	0.232283	1e-5	0.766152	1e-5	1e-5	1e-5	1e-5	0.001477	1e-5	TRUE
JU3125	JU3125	13.3722	38.1127	Sicily	Italy	0.456677	J	1e-5	0.159879	1e-5	0.383364	1e-5	1e-5	1e-5	1e-5	1e-5	0.456677	1e-5	FALSE
JU3127	JU3127	13.37274	38.11196	Sicily	Italy	0.60954	J	1e-5	0.18184	1e-5	0.208539	1e-5	1e-5	1e-5	1e-5	1e-5	0.60954	1e-5	FALSE
JU3128	JU3128	15.2763	37.076	Sicily	Italy	0.758862	D	1e-5	0.002708	1e-5	0.758862	1e-5	1e-5	0.012627	1e-5	0.225733	1e-5	1e-5	FALSE
JU3144	JU3144	10.52	6.18	Northwest	Cameroon	0.366712	K	1e-5	1e-5	1e-5	0.322822	1e-5	1e-5	1e-5	1e-5	0.109345	0.20105	0.366712	FALSE
ECA393	ECA189	-155.235493	19.449831	Hawaii	Unites States	0.842304	E	1e-5	1e-5	0.157606	1e-5	0.842304	1e-5	1e-5	1e-5	1e-5	1e-5	1e-5	TRUE
ECA397	ECA396	-155.235493	19.449831	Hawaii	Unites States	0.9999	H	1e-5	1e-5	1e-5	1e-5	1e-5	1e-5	1e-5	0.9999	1e-5	1e-5	1e-5	TRUE
ECA243	CB4851	0.48	44.85	Aquitaine	France	0.9999	B	1e-5	0.9999	1e-5	1e-5	1e-5	1e-5	1e-5	1e-5	1e-5	1e-5	1e-5	FALSE
PS2025	PS2025	-118.13	34.19	California	United States	0.9999	C	1e-5	1e-5	0.9999	1e-5	1e-5	1e-5	1e-5	1e-5	1e-5	1e-5	1e-5	FALSE
ECA347	ECA347	-155.303611	19.438889	Hawaii	United States	0.9999	F	1e-5	1e-5	1e-5	1e-5	1e-5	0.9999	1e-5	1e-5	1e-5	1e-5	1e-5	TRUE
ECA702	ECA701	-159.656428	22.123283	Hawaii	United States	0.58748	F	0.250814	1e-5	1e-5	1e-5	1e-5	0.58748	1e-5	0.161626	1e-5	1e-5	1e-5	TRUE
ECA734	ECA738	-156.9740559	21.13927631	Hawaii	United States	0.720652	E	1e-5	1e-5	0.279258	1e-5	0.720652	1e-5	1e-5	1e-5	1e-5	1e-5	1e-5	TRUE
ECA822	ECA705	-155.438922	20.038831	Hawaii	United States	0.9999	E	1e-5	1e-5	1e-5	1e-5	0.9999	1e-5	1e-5	1e-5	1e-5	1e-5	1e-5	TRUE
ECA707	ECA778	-155.441517	20.039783	Hawaii	United States	0.999896	E	1e-5	1e-5	1e-5	1e-5	0.999896	1e-5	1e-5	1e-5	1.4e-5	1e-5	1e-5	TRUE
ECA721	ECA778	-155.441419	20.039858	Hawaii	United States	0.999896	E	1e-5	1e-5	1e-5	1e-5	0.999896	1e-5	1e-5	1e-5	1.4e-5	1e-5	1e-5	TRUE
ECA716	ECA807	-155.441408	20.039844	Hawaii	United States	0.9999	E	1e-5	1e-5	1e-5	1e-5	0.9999	1e-5	1e-5	1e-5	1e-5	1e-5	1e-5	TRUE
ECA720	ECA807	-155.441419	20.039858	Hawaii	United States	0.9999	E	1e-5	1e-5	1e-5	1e-5	0.9999	1e-5	1e-5	1e-5	1e-5	1e-5	1e-5	TRUE
ECA704	ECA812	-155.441517	20.039783	Hawaii	United States	0.999899	E	1e-5	1e-5	1e-5	1e-5	0.999899	1e-5	1e-5	1.1e-5	1e-5	1e-5	1e-5	TRUE
ECA719	ECA812	-155.441419	20.039858	Hawaii	United States	0.999899	E	1e-5	1e-5	1e-5	1e-5	0.999899	1e-5	1e-5	1.1e-5	1e-5	1e-5	1e-5	TRUE
ECA703	ECA703	-155.438922	20.038831	Hawaii	United States	0.9999	A	0.9999	1e-5	1e-5	1e-5	1e-5	1e-5	1e-5	1e-5	1e-5	1e-5	1e-5	TRUE
ECA706	ECA706	-155.438922	20.038831	Hawaii	United States	0.856741	A	0.856741	1e-5	1e-5	1e-5	0.143163	1e-5	1e-5	1.6e-5	1e-5	1e-5	1e-5	TRUE
ECA710	ECA710	-155.438103	20.039656	Hawaii	United States	0.928485	E	1e-5	1e-5	0.071425	1e-5	0.928485	1e-5	1e-5	1e-5	1e-5	1e-5	1e-5	TRUE
ECA711	ECA712	-155.222478	19.423864	Hawaii	United States	0.9999	E	1e-5	1e-5	1e-5	1e-5	0.9999	1e-5	1e-5	1e-5	1e-5	1e-5	1e-5	TRUE
ECA728	ECA723	-155.221661	19.424272	Hawaii	United States	0.999884	H	1.3e-5	1.6e-5	1e-5	1e-5	1e-5	1e-5	1e-5	0.999884	1.7e-5	1e-5	1e-5	TRUE
ECA725	ECA724	-155.303825	19.439144	Hawaii	United States	0.991476	F	1e-5	1e-5	0.008431	1e-5	1e-5	0.991476	1.3e-5	1e-5	1e-5	1e-5	1e-5	TRUE
ECA722	ECA722	-155.222625	19.423975	Hawaii	United States	0.9999	H	1e-5	1e-5	1e-5	1e-5	1e-5	1e-5	1e-5	0.9999	1e-5	1e-5	1e-5	TRUE
ECA730	ECA730	-155.222483	19.423869	Hawaii	United States	0.9999	H	1e-5	1e-5	1e-5	1e-5	1e-5	1e-5	1e-5	0.9999	1e-5	1e-5	1e-5	TRUE
ECA740	ECA740	-156.339189	20.670022	Hawaii	United States	0.999895	F	1e-5	1e-5	1e-5	1e-5	1e-5	0.999895	1e-5	1e-5	1.5e-5	1e-5	1e-5	TRUE
ECA741	ECA741	-156.338322	20.6762	Hawaii	United States	0.999898	F	1e-5	1e-5	1e-5	1e-5	1e-5	0.999898	1e-5	1.2e-5	1e-5	1e-5	1e-5	TRUE
ECA731	ECA733	-155.818386	19.115886	Hawaii	United States	0.9999	A	0.9999	1e-5	1e-5	1e-5	1e-5	1e-5	1e-5	1e-5	1e-5	1e-5	1e-5	TRUE
ECA747	ECA745	-155.955839	19.700464	Hawaii	United States	0.999898	H	1e-5	1e-5	1e-5	1.2e-5	1e-5	1e-5	1e-5	0.999898	1e-5	1e-5	1e-5	TRUE
ECA732	ECA732	-155.81845	19.115403	Hawaii	United States	0.9999	A	0.9999	1e-5	1e-5	1e-5	1e-5	1e-5	1e-5	1e-5	1e-5	1e-5	1e-5	TRUE
ECA744	ECA744	-155.949572	19.719231	Hawaii	United States	0.9999	H	1e-5	1e-5	1e-5	1e-5	1e-5	1e-5	1e-5	0.9999	1e-5	1e-5	1e-5	TRUE
ECA746	ECA746	-155.819336	19.115292	Hawaii	United States	0.9999	H	1e-5	1e-5	1e-5	1e-5	1e-5	1e-5	1e-5	0.9999	1e-5	1e-5	1e-5	TRUE
ECA742	ECA742	-156.2781	20.80569	Hawaii	United States	0.999881	F	1e-5	1.2e-5	1e-5	1e-5	1.3e-5	0.999881	1e-5	1.6e-5	1e-5	1.8e-5	1e-5	TRUE
ECA743	ECA743	-156.32317	20.741871	Hawaii	United States	0.84473	E	1e-5	0.044726	0.025694	0.052205	0.84473	1e-5	1e-5	1e-5	0.032585	1e-5	1e-5	TRUE
ECA739	ECA760	-155.441619	20.039869	Hawaii	United States	0.9999	E	1e-5	1e-5	1e-5	1e-5	0.9999	1e-5	1e-5	1e-5	1e-5	1e-5	1e-5	TRUE
ECA749	ECA760	-155.441608	20.039875	Hawaii	United States	0.9999	E	1e-5	1e-5	1e-5	1e-5	0.9999	1e-5	1e-5	1e-5	1e-5	1e-5	1e-5	TRUE
ECA752	ECA760	-155.441492	20.039847	Hawaii	United States	0.9999	E	1e-5	1e-5	1e-5	1e-5	0.9999	1e-5	1e-5	1e-5	1e-5	1e-5	1e-5	TRUE
ECA754	ECA760	-155.441464	20.039869	Hawaii	United States	0.9999	E	1e-5	1e-5	1e-5	1e-5	0.9999	1e-5	1e-5	1e-5	1e-5	1e-5	1e-5	TRUE
ECA758	ECA760	-155.441531	20.039886	Hawaii	United States	0.9999	E	1e-5	1e-5	1e-5	1e-5	0.9999	1e-5	1e-5	1e-5	1e-5	1e-5	1e-5	TRUE
ECA779	ECA760	-155.441608	20.039858	Hawaii	United States	0.9999	E	1e-5	1e-5	1e-5	1e-5	0.9999	1e-5	1e-5	1e-5	1e-5	1e-5	1e-5	TRUE
ECA784	ECA760	-155.441481	20.039783	Hawaii	United States	0.9999	E	1e-5	1e-5	1e-5	1e-5	0.9999	1e-5	1e-5	1e-5	1e-5	1e-5	1e-5	TRUE
ECA772	ECA768	-155.441503	20.039908	Hawaii	United States	0.999899	E	1e-5	1e-5	1e-5	1.1e-5	0.999899	1e-5	1e-5	1e-5	1e-5	1e-5	1e-5	TRUE
ECA756	ECA778	-155.441533	20.039822	Hawaii	United States	0.999896	E	1e-5	1e-5	1e-5	1e-5	0.999896	1e-5	1e-5	1e-5	1.4e-5	1e-5	1e-5	TRUE
ECA763	ECA778	-155.441608	20.039878	Hawaii	United States	0.999896	E	1e-5	1e-5	1e-5	1e-5	0.999896	1e-5	1e-5	1e-5	1.4e-5	1e-5	1e-5	TRUE
ECA781	ECA778	-155.441608	20.039858	Hawaii	United States	0.999896	E	1e-5	1e-5	1e-5	1e-5	0.999896	1e-5	1e-5	1e-5	1.4e-5	1e-5	1e-5	TRUE
ECA810	ECA778	-155.441531	20.039897	Hawaii	United States	0.999896	E	1e-5	1e-5	1e-5	1e-5	0.999896	1e-5	1e-5	1e-5	1.4e-5	1e-5	1e-5	TRUE
ECA770	ECA807	-155.441531	20.039869	Hawaii	United States	0.9999	E	1e-5	1e-5	1e-5	1e-5	0.9999	1e-5	1e-5	1e-5	1e-5	1e-5	1e-5	TRUE
ECA748	ECA812	-155.441492	20.039847	Hawaii	United States	0.999899	E	1e-5	1e-5	1e-5	1e-5	0.999899	1e-5	1e-5	1.1e-5	1e-5	1e-5	1e-5	TRUE
ECA755	ECA812	-155.441464	20.039869	Hawaii	United States	0.999899	E	1e-5	1e-5	1e-5	1e-5	0.999899	1e-5	1e-5	1.1e-5	1e-5	1e-5	1e-5	TRUE
ECA759	ECA812	-155.441531	20.039886	Hawaii	United States	0.999899	E	1e-5	1e-5	1e-5	1e-5	0.999899	1e-5	1e-5	1.1e-5	1e-5	1e-5	1e-5	TRUE
ECA762	ECA812	-155.441533	20.039822	Hawaii	United States	0.999899	E	1e-5	1e-5	1e-5	1e-5	0.999899	1e-5	1e-5	1.1e-5	1e-5	1e-5	1e-5	TRUE
ECA771	ECA812	-155.441644	20.039864	Hawaii	United States	0.999899	E	1e-5	1e-5	1e-5	1e-5	0.999899	1e-5	1e-5	1.1e-5	1e-5	1e-5	1e-5	TRUE
ECA774	ECA812	-155.441531	20.039869	Hawaii	United States	0.999899	E	1e-5	1e-5	1e-5	1e-5	0.999899	1e-5	1e-5	1.1e-5	1e-5	1e-5	1e-5	TRUE
ECA782	ECA812	-155.441608	20.039875	Hawaii	United States	0.999899	E	1e-5	1e-5	1e-5	1e-5	0.999899	1e-5	1e-5	1.1e-5	1e-5	1e-5	1e-5	TRUE
ECA783	ECA812	-155.441481	20.039783	Hawaii	United States	0.999899	E	1e-5	1e-5	1e-5	1e-5	0.999899	1e-5	1e-5	1.1e-5	1e-5	1e-5	1e-5	TRUE
ECA813	ECA812	-155.441542	20.039917	Hawaii	United States	0.999899	E	1e-5	1e-5	1e-5	1e-5	0.999899	1e-5	1e-5	1.1e-5	1e-5	1e-5	1e-5	TRUE
ECA768	ECA768	-155.441556	20.039914	Hawaii	United States	0.999899	E	1e-5	1e-5	1e-5	1.1e-5	0.999899	1e-5	1e-5	1e-5	1e-5	1e-5	1e-5	TRUE
ECA777	ECA777	-155.441503	20.039908	Hawaii	United States	0.999896	E	1e-5	1e-5	1e-5	1e-5	0.999896	1e-5	1e-5	1e-5	1.4e-5	1e-5	1e-5	TRUE
ECA778	ECA778	-155.441503	20.039908	Hawaii	United States	0.999896	E	1e-5	1e-5	1e-5	1e-5	0.999896	1e-5	1e-5	1e-5	1.4e-5	1e-5	1e-5	TRUE
