# Supplementary material for: Deep sampling of Hawaiian Caenorhabditis elegans reveals high genetic diversity and admixture with global populations
Source: eLife journal article supplement (doi:10.7554/elife.50465), 2019-12-03
Supplement: supp [file elife-50465-supp-v1.zip › elife_poa_e50465_Figure_6_figure_supplement_2_source_data_1.csv]

isotype	pop_assignment	E	C	H
CB4853	C	1e-5	0.692965	1e-5
CB4855	C	1e-5	0.815787	1e-5
CB4857	C	1e-5	0.999899	1e-5
CB4858	C	1e-5	0.9999	1e-5
CX11254	C	1e-5	0.656296	1e-5
CX11262	C	1e-5	0.9999	1e-5
CX11264	C	1e-5	0.9999	1e-5
CX11276	C	1e-5	0.591298	1e-5
CX11285	C	1e-5	0.662305	1e-5
CX11292	C	1e-5	0.727048	1e-5
CX11307	C	1e-5	0.59957	1e-5
CX11314	C	1e-5	0.9999	1e-5
CX11315	C	1e-5	0.855784	1e-5
DL226	C	1e-5	0.722598	2e-5
ECA189	E	0.842304	0.157606	1e-5
ECA191	H	1e-5	1e-5	0.9999
ECA348	C	1e-5	0.9999	1e-5
ECA349	C	1e-5	0.9999	1e-5
ECA372	E	0.766152	0.232283	1e-5
ECA396	H	1e-5	1e-5	0.9999
ECA705	E	0.9999	1e-5	1e-5
ECA710	E	0.928485	0.071425	1e-5
ECA712	E	0.9999	1e-5	1e-5
ECA722	H	1e-5	1e-5	0.9999
ECA723	H	1e-5	1e-5	0.999884
ECA730	H	1e-5	1e-5	0.9999
ECA738	E	0.720652	0.279258	1e-5
ECA743	E	0.84473	0.025694	1e-5
ECA744	H	1e-5	1e-5	0.9999
ECA745	H	1e-5	1e-5	0.999898
ECA746	H	1e-5	1e-5	0.9999
ECA760	E	0.9999	1e-5	1e-5
ECA768	E	0.999899	1e-5	1e-5
ECA777	E	0.999896	1e-5	1e-5
ECA778	E	0.999896	1e-5	1e-5
ECA807	E	0.9999	1e-5	1e-5
ECA812	E	0.999899	1e-5	1.1e-5
ED3011	C	1e-5	0.335005	1e-5
JU1172	C	1e-5	0.765549	1e-5
JU2016	C	1e-5	0.686517	1e-5
JU2017	C	1e-5	0.40346	1e-5
JU2862	C	1e-5	0.426445	1e-5
JU2866	C	1e-5	0.9999	1e-5
MY23	E	0.510437	1e-5	1e-5
PB306	C	1e-5	0.9999	1e-5
PS2025	C	1e-5	0.9999	1e-5
QG556	C	0.139643	0.860267	1e-5
QG557	C	1e-5	0.9999	1e-5
QX1212	C	1e-5	0.806142	1e-5
QX1233	C	1e-5	0.855445	1e-5
QX1792	E	0.617955	1e-5	1e-5
QX1793	E	0.875683	1e-5	1.2e-5
QX1794	E	0.855294	0.10701	1e-5
XZ1513	E	0.843273	0.156637	1e-5
XZ1515	E	0.569182	0.334387	1e-5
