# Supplementary material for: Deep sampling of Hawaiian Caenorhabditis elegans reveals high genetic diversity and admixture with global populations
Source: eLife journal article supplement (doi:10.7554/elife.50465), 2019-12-03
Supplement: supp [file elife-50465-supp-v1.zip › elife_poa_e50465_Figure_6_source_data_1.csv]

isotype	max_pop_frac	pop_assignment	Hawaiian	cluster	frac_cluster	ordered_isotype
QX1791	0.559108	A	TRUE	A	0.559108	QX1791
XZ1515	0.569182	E	TRUE	A	1e-5	XZ1515
ECA701	0.58748	F	TRUE	A	0.250814	ECA701
QX1792	0.617955	E	TRUE	A	1e-5	QX1792
XZ1516	0.624136	F	TRUE	A	0.174719	XZ1516
ECA738	0.720652	E	TRUE	A	1e-5	ECA738
ECA372	0.766152	E	TRUE	A	1.8e-5	ECA372
ECA189	0.842304	E	TRUE	A	1e-5	ECA189
XZ1513	0.843273	E	TRUE	A	1e-5	XZ1513
ECA743	0.84473	E	TRUE	A	1e-5	ECA743
QX1794	0.855294	E	TRUE	A	1e-5	QX1794
ECA706	0.856741	A	TRUE	A	0.856741	ECA706
QX1793	0.875683	E	TRUE	A	1e-5	QX1793
ECA710	0.928485	E	TRUE	A	1e-5	ECA710
ECA724	0.991476	F	TRUE	A	1e-5	ECA724
ECA742	0.999881	F	TRUE	A	1e-5	ECA742
ECA723	0.999884	H	TRUE	A	1.3e-5	ECA723
XZ1514	0.999894	F	TRUE	A	1e-5	XZ1514
ECA740	0.999895	F	TRUE	A	1e-5	ECA740
ECA777	0.999896	E	TRUE	A	1e-5	ECA777
ECA778	0.999896	E	TRUE	A	1e-5	ECA778
DL238	0.999898	A	TRUE	A	0.999898	DL238
ECA741	0.999898	F	TRUE	A	1e-5	ECA741
ECA745	0.999898	H	TRUE	A	1e-5	ECA745
ECA768	0.999899	E	TRUE	A	1e-5	ECA768
ECA812	0.999899	E	TRUE	A	1e-5	ECA812
CB4856	0.9999	A	TRUE	A	0.9999	CB4856
ECA191	0.9999	H	TRUE	A	1e-5	ECA191
ECA347	0.9999	F	TRUE	A	1e-5	ECA347
ECA363	0.9999	F	TRUE	A	1e-5	ECA363
ECA369	0.9999	A	TRUE	A	0.9999	ECA369
ECA396	0.9999	H	TRUE	A	1e-5	ECA396
ECA703	0.9999	A	TRUE	A	0.9999	ECA703
ECA705	0.9999	E	TRUE	A	1e-5	ECA705
ECA712	0.9999	E	TRUE	A	1e-5	ECA712
ECA722	0.9999	H	TRUE	A	1e-5	ECA722
ECA730	0.9999	H	TRUE	A	1e-5	ECA730
ECA732	0.9999	A	TRUE	A	0.9999	ECA732
ECA733	0.9999	A	TRUE	A	0.9999	ECA733
ECA744	0.9999	H	TRUE	A	1e-5	ECA744
ECA746	0.9999	H	TRUE	A	1e-5	ECA746
ECA760	0.9999	E	TRUE	A	1e-5	ECA760
ECA807	0.9999	E	TRUE	A	1e-5	ECA807
QX1791	0.559108	A	TRUE	B	0.107565	QX1791
XZ1515	0.569182	E	TRUE	B	1e-5	XZ1515
ECA701	0.58748	F	TRUE	B	1e-5	ECA701
QX1792	0.617955	E	TRUE	B	1e-5	QX1792
XZ1516	0.624136	F	TRUE	B	1e-5	XZ1516
ECA738	0.720652	E	TRUE	B	1e-5	ECA738
ECA372	0.766152	E	TRUE	B	1e-5	ECA372
ECA189	0.842304	E	TRUE	B	1e-5	ECA189
XZ1513	0.843273	E	TRUE	B	1e-5	XZ1513
ECA743	0.84473	E	TRUE	B	0.044726	ECA743
QX1794	0.855294	E	TRUE	B	1e-5	QX1794
ECA706	0.856741	A	TRUE	B	1e-5	ECA706
QX1793	0.875683	E	TRUE	B	1e-5	QX1793
ECA710	0.928485	E	TRUE	B	1e-5	ECA710
ECA724	0.991476	F	TRUE	B	1e-5	ECA724
ECA742	0.999881	F	TRUE	B	1.2e-5	ECA742
ECA723	0.999884	H	TRUE	B	1.6e-5	ECA723
XZ1514	0.999894	F	TRUE	B	1.2e-5	XZ1514
ECA740	0.999895	F	TRUE	B	1e-5	ECA740
ECA777	0.999896	E	TRUE	B	1e-5	ECA777
ECA778	0.999896	E	TRUE	B	1e-5	ECA778
DL238	0.999898	A	TRUE	B	1e-5	DL238
ECA741	0.999898	F	TRUE	B	1e-5	ECA741
ECA745	0.999898	H	TRUE	B	1e-5	ECA745
ECA768	0.999899	E	TRUE	B	1e-5	ECA768
ECA812	0.999899	E	TRUE	B	1e-5	ECA812
CB4856	0.9999	A	TRUE	B	1e-5	CB4856
ECA191	0.9999	H	TRUE	B	1e-5	ECA191
ECA347	0.9999	F	TRUE	B	1e-5	ECA347
ECA363	0.9999	F	TRUE	B	1e-5	ECA363
ECA369	0.9999	A	TRUE	B	1e-5	ECA369
ECA396	0.9999	H	TRUE	B	1e-5	ECA396
ECA703	0.9999	A	TRUE	B	1e-5	ECA703
ECA705	0.9999	E	TRUE	B	1e-5	ECA705
ECA712	0.9999	E	TRUE	B	1e-5	ECA712
ECA722	0.9999	H	TRUE	B	1e-5	ECA722
ECA730	0.9999	H	TRUE	B	1e-5	ECA730
ECA732	0.9999	A	TRUE	B	1e-5	ECA732
ECA733	0.9999	A	TRUE	B	1e-5	ECA733
ECA744	0.9999	H	TRUE	B	1e-5	ECA744
ECA746	0.9999	H	TRUE	B	1e-5	ECA746
ECA760	0.9999	E	TRUE	B	1e-5	ECA760
ECA807	0.9999	E	TRUE	B	1e-5	ECA807
QX1791	0.559108	A	TRUE	C	0.137053	QX1791
XZ1515	0.569182	E	TRUE	C	0.334387	XZ1515
ECA701	0.58748	F	TRUE	C	1e-5	ECA701
QX1792	0.617955	E	TRUE	C	1e-5	QX1792
XZ1516	0.624136	F	TRUE	C	1e-5	XZ1516
ECA738	0.720652	E	TRUE	C	0.279258	ECA738
ECA372	0.766152	E	TRUE	C	0.232283	ECA372
ECA189	0.842304	E	TRUE	C	0.157606	ECA189
XZ1513	0.843273	E	TRUE	C	0.156637	XZ1513
ECA743	0.84473	E	TRUE	C	0.025694	ECA743
QX1794	0.855294	E	TRUE	C	0.10701	QX1794
ECA706	0.856741	A	TRUE	C	1e-5	ECA706
QX1793	0.875683	E	TRUE	C	1e-5	QX1793
ECA710	0.928485	E	TRUE	C	0.071425	ECA710
ECA724	0.991476	F	TRUE	C	0.008431	ECA724
ECA742	0.999881	F	TRUE	C	1e-5	ECA742
ECA723	0.999884	H	TRUE	C	1e-5	ECA723
XZ1514	0.999894	F	TRUE	C	1e-5	XZ1514
ECA740	0.999895	F	TRUE	C	1e-5	ECA740
ECA777	0.999896	E	TRUE	C	1e-5	ECA777
ECA778	0.999896	E	TRUE	C	1e-5	ECA778
DL238	0.999898	A	TRUE	C	1e-5	DL238
ECA741	0.999898	F	TRUE	C	1e-5	ECA741
ECA745	0.999898	H	TRUE	C	1e-5	ECA745
ECA768	0.999899	E	TRUE	C	1e-5	ECA768
ECA812	0.999899	E	TRUE	C	1e-5	ECA812
CB4856	0.9999	A	TRUE	C	1e-5	CB4856
ECA191	0.9999	H	TRUE	C	1e-5	ECA191
ECA347	0.9999	F	TRUE	C	1e-5	ECA347
ECA363	0.9999	F	TRUE	C	1e-5	ECA363
ECA369	0.9999	A	TRUE	C	1e-5	ECA369
ECA396	0.9999	H	TRUE	C	1e-5	ECA396
ECA703	0.9999	A	TRUE	C	1e-5	ECA703
ECA705	0.9999	E	TRUE	C	1e-5	ECA705
ECA712	0.9999	E	TRUE	C	1e-5	ECA712
ECA722	0.9999	H	TRUE	C	1e-5	ECA722
ECA730	0.9999	H	TRUE	C	1e-5	ECA730
ECA732	0.9999	A	TRUE	C	1e-5	ECA732
ECA733	0.9999	A	TRUE	C	1e-5	ECA733
ECA744	0.9999	H	TRUE	C	1e-5	ECA744
ECA746	0.9999	H	TRUE	C	1e-5	ECA746
ECA760	0.9999	E	TRUE	C	1e-5	ECA760
ECA807	0.9999	E	TRUE	C	1e-5	ECA807
QX1791	0.559108	A	TRUE	D	1e-5	QX1791
XZ1515	0.569182	E	TRUE	D	1e-5	XZ1515
ECA701	0.58748	F	TRUE	D	1e-5	ECA701
QX1792	0.617955	E	TRUE	D	0.220457	QX1792
XZ1516	0.624136	F	TRUE	D	1e-5	XZ1516
ECA738	0.720652	E	TRUE	D	1e-5	ECA738
ECA372	0.766152	E	TRUE	D	1e-5	ECA372
ECA189	0.842304	E	TRUE	D	1e-5	ECA189
XZ1513	0.843273	E	TRUE	D	1e-5	XZ1513
ECA743	0.84473	E	TRUE	D	0.052205	ECA743
QX1794	0.855294	E	TRUE	D	0.037616	QX1794
ECA706	0.856741	A	TRUE	D	1e-5	ECA706
QX1793	0.875683	E	TRUE	D	1e-5	QX1793
ECA710	0.928485	E	TRUE	D	1e-5	ECA710
ECA724	0.991476	F	TRUE	D	1e-5	ECA724
ECA742	0.999881	F	TRUE	D	1e-5	ECA742
ECA723	0.999884	H	TRUE	D	1e-5	ECA723
XZ1514	0.999894	F	TRUE	D	1e-5	XZ1514
ECA740	0.999895	F	TRUE	D	1e-5	ECA740
ECA777	0.999896	E	TRUE	D	1e-5	ECA777
ECA778	0.999896	E	TRUE	D	1e-5	ECA778
DL238	0.999898	A	TRUE	D	1e-5	DL238
ECA741	0.999898	F	TRUE	D	1e-5	ECA741
ECA745	0.999898	H	TRUE	D	1.2e-5	ECA745
ECA768	0.999899	E	TRUE	D	1.1e-5	ECA768
ECA812	0.999899	E	TRUE	D	1e-5	ECA812
CB4856	0.9999	A	TRUE	D	1e-5	CB4856
ECA191	0.9999	H	TRUE	D	1e-5	ECA191
ECA347	0.9999	F	TRUE	D	1e-5	ECA347
ECA363	0.9999	F	TRUE	D	1e-5	ECA363
ECA369	0.9999	A	TRUE	D	1e-5	ECA369
ECA396	0.9999	H	TRUE	D	1e-5	ECA396
ECA703	0.9999	A	TRUE	D	1e-5	ECA703
ECA705	0.9999	E	TRUE	D	1e-5	ECA705
ECA712	0.9999	E	TRUE	D	1e-5	ECA712
ECA722	0.9999	H	TRUE	D	1e-5	ECA722
ECA730	0.9999	H	TRUE	D	1e-5	ECA730
ECA732	0.9999	A	TRUE	D	1e-5	ECA732
ECA733	0.9999	A	TRUE	D	1e-5	ECA733
ECA744	0.9999	H	TRUE	D	1e-5	ECA744
ECA746	0.9999	H	TRUE	D	1e-5	ECA746
ECA760	0.9999	E	TRUE	D	1e-5	ECA760
ECA807	0.9999	E	TRUE	D	1e-5	ECA807
QX1791	0.559108	A	TRUE	E	0.061847	QX1791
XZ1515	0.569182	E	TRUE	E	0.569182	XZ1515
ECA701	0.58748	F	TRUE	E	1e-5	ECA701
QX1792	0.617955	E	TRUE	E	0.617955	QX1792
XZ1516	0.624136	F	TRUE	E	1e-5	XZ1516
ECA738	0.720652	E	TRUE	E	0.720652	ECA738
ECA372	0.766152	E	TRUE	E	0.766152	ECA372
ECA189	0.842304	E	TRUE	E	0.842304	ECA189
XZ1513	0.843273	E	TRUE	E	0.843273	XZ1513
ECA743	0.84473	E	TRUE	E	0.84473	ECA743
QX1794	0.855294	E	TRUE	E	0.855294	QX1794
ECA706	0.856741	A	TRUE	E	0.143163	ECA706
QX1793	0.875683	E	TRUE	E	0.875683	QX1793
ECA710	0.928485	E	TRUE	E	0.928485	ECA710
ECA724	0.991476	F	TRUE	E	1e-5	ECA724
ECA742	0.999881	F	TRUE	E	1.3e-5	ECA742
ECA723	0.999884	H	TRUE	E	1e-5	ECA723
XZ1514	0.999894	F	TRUE	E	1e-5	XZ1514
ECA740	0.999895	F	TRUE	E	1e-5	ECA740
ECA777	0.999896	E	TRUE	E	0.999896	ECA777
ECA778	0.999896	E	TRUE	E	0.999896	ECA778
DL238	0.999898	A	TRUE	E	1e-5	DL238
ECA741	0.999898	F	TRUE	E	1e-5	ECA741
ECA745	0.999898	H	TRUE	E	1e-5	ECA745
ECA768	0.999899	E	TRUE	E	0.999899	ECA768
ECA812	0.999899	E	TRUE	E	0.999899	ECA812
CB4856	0.9999	A	TRUE	E	1e-5	CB4856
ECA191	0.9999	H	TRUE	E	1e-5	ECA191
ECA347	0.9999	F	TRUE	E	1e-5	ECA347
ECA363	0.9999	F	TRUE	E	1e-5	ECA363
ECA369	0.9999	A	TRUE	E	1e-5	ECA369
ECA396	0.9999	H	TRUE	E	1e-5	ECA396
ECA703	0.9999	A	TRUE	E	1e-5	ECA703
ECA705	0.9999	E	TRUE	E	0.9999	ECA705
ECA712	0.9999	E	TRUE	E	0.9999	ECA712
ECA722	0.9999	H	TRUE	E	1e-5	ECA722
ECA730	0.9999	H	TRUE	E	1e-5	ECA730
ECA732	0.9999	A	TRUE	E	1e-5	ECA732
ECA733	0.9999	A	TRUE	E	1e-5	ECA733
ECA744	0.9999	H	TRUE	E	1e-5	ECA744
ECA746	0.9999	H	TRUE	E	1e-5	ECA746
ECA760	0.9999	E	TRUE	E	0.9999	ECA760
ECA807	0.9999	E	TRUE	E	0.9999	ECA807
QX1791	0.559108	A	TRUE	F	1e-5	QX1791
XZ1515	0.569182	E	TRUE	F	0.096351	XZ1515
ECA701	0.58748	F	TRUE	F	0.58748	ECA701
QX1792	0.617955	E	TRUE	F	1e-5	QX1792
XZ1516	0.624136	F	TRUE	F	0.624136	XZ1516
ECA738	0.720652	E	TRUE	F	1e-5	ECA738
ECA372	0.766152	E	TRUE	F	1e-5	ECA372
ECA189	0.842304	E	TRUE	F	1e-5	ECA189
XZ1513	0.843273	E	TRUE	F	1e-5	XZ1513
ECA743	0.84473	E	TRUE	F	1e-5	ECA743
QX1794	0.855294	E	TRUE	F	1e-5	QX1794
ECA706	0.856741	A	TRUE	F	1e-5	ECA706
QX1793	0.875683	E	TRUE	F	1e-5	QX1793
ECA710	0.928485	E	TRUE	F	1e-5	ECA710
ECA724	0.991476	F	TRUE	F	0.991476	ECA724
ECA742	0.999881	F	TRUE	F	0.999881	ECA742
ECA723	0.999884	H	TRUE	F	1e-5	ECA723
XZ1514	0.999894	F	TRUE	F	0.999894	XZ1514
ECA740	0.999895	F	TRUE	F	0.999895	ECA740
ECA777	0.999896	E	TRUE	F	1e-5	ECA777
ECA778	0.999896	E	TRUE	F	1e-5	ECA778
DL238	0.999898	A	TRUE	F	1e-5	DL238
ECA741	0.999898	F	TRUE	F	0.999898	ECA741
ECA745	0.999898	H	TRUE	F	1e-5	ECA745
ECA768	0.999899	E	TRUE	F	1e-5	ECA768
ECA812	0.999899	E	TRUE	F	1e-5	ECA812
CB4856	0.9999	A	TRUE	F	1e-5	CB4856
ECA191	0.9999	H	TRUE	F	1e-5	ECA191
ECA347	0.9999	F	TRUE	F	0.9999	ECA347
ECA363	0.9999	F	TRUE	F	0.9999	ECA363
ECA369	0.9999	A	TRUE	F	1e-5	ECA369
ECA396	0.9999	H	TRUE	F	1e-5	ECA396
ECA703	0.9999	A	TRUE	F	1e-5	ECA703
ECA705	0.9999	E	TRUE	F	1e-5	ECA705
ECA712	0.9999	E	TRUE	F	1e-5	ECA712
ECA722	0.9999	H	TRUE	F	1e-5	ECA722
ECA730	0.9999	H	TRUE	F	1e-5	ECA730
ECA732	0.9999	A	TRUE	F	1e-5	ECA732
ECA733	0.9999	A	TRUE	F	1e-5	ECA733
ECA744	0.9999	H	TRUE	F	1e-5	ECA744
ECA746	0.9999	H	TRUE	F	1e-5	ECA746
ECA760	0.9999	E	TRUE	F	1e-5	ECA760
ECA807	0.9999	E	TRUE	F	1e-5	ECA807
QX1791	0.559108	A	TRUE	G	1e-5	QX1791
XZ1515	0.569182	E	TRUE	G	1e-5	XZ1515
ECA701	0.58748	F	TRUE	G	1e-5	ECA701
QX1792	0.617955	E	TRUE	G	1e-5	QX1792
XZ1516	0.624136	F	TRUE	G	1e-5	XZ1516
ECA738	0.720652	E	TRUE	G	1e-5	ECA738
ECA372	0.766152	E	TRUE	G	1e-5	ECA372
ECA189	0.842304	E	TRUE	G	1e-5	ECA189
XZ1513	0.843273	E	TRUE	G	1e-5	XZ1513
ECA743	0.84473	E	TRUE	G	1e-5	ECA743
QX1794	0.855294	E	TRUE	G	1e-5	QX1794
ECA706	0.856741	A	TRUE	G	1e-5	ECA706
QX1793	0.875683	E	TRUE	G	1e-5	QX1793
ECA710	0.928485	E	TRUE	G	1e-5	ECA710
ECA724	0.991476	F	TRUE	G	1.3e-5	ECA724
ECA742	0.999881	F	TRUE	G	1e-5	ECA742
ECA723	0.999884	H	TRUE	G	1e-5	ECA723
XZ1514	0.999894	F	TRUE	G	1e-5	XZ1514
ECA740	0.999895	F	TRUE	G	1e-5	ECA740
ECA777	0.999896	E	TRUE	G	1e-5	ECA777
ECA778	0.999896	E	TRUE	G	1e-5	ECA778
DL238	0.999898	A	TRUE	G	1e-5	DL238
ECA741	0.999898	F	TRUE	G	1e-5	ECA741
ECA745	0.999898	H	TRUE	G	1e-5	ECA745
ECA768	0.999899	E	TRUE	G	1e-5	ECA768
ECA812	0.999899	E	TRUE	G	1e-5	ECA812
CB4856	0.9999	A	TRUE	G	1e-5	CB4856
ECA191	0.9999	H	TRUE	G	1e-5	ECA191
ECA347	0.9999	F	TRUE	G	1e-5	ECA347
ECA363	0.9999	F	TRUE	G	1e-5	ECA363
ECA369	0.9999	A	TRUE	G	1e-5	ECA369
ECA396	0.9999	H	TRUE	G	1e-5	ECA396
ECA703	0.9999	A	TRUE	G	1e-5	ECA703
ECA705	0.9999	E	TRUE	G	1e-5	ECA705
ECA712	0.9999	E	TRUE	G	1e-5	ECA712
ECA722	0.9999	H	TRUE	G	1e-5	ECA722
ECA730	0.9999	H	TRUE	G	1e-5	ECA730
ECA732	0.9999	A	TRUE	G	1e-5	ECA732
ECA733	0.9999	A	TRUE	G	1e-5	ECA733
ECA744	0.9999	H	TRUE	G	1e-5	ECA744
ECA746	0.9999	H	TRUE	G	1e-5	ECA746
ECA760	0.9999	E	TRUE	G	1e-5	ECA760
ECA807	0.9999	E	TRUE	G	1e-5	ECA807
QX1791	0.559108	A	TRUE	H	1e-5	QX1791
XZ1515	0.569182	E	TRUE	H	1e-5	XZ1515
ECA701	0.58748	F	TRUE	H	0.161626	ECA701
QX1792	0.617955	E	TRUE	H	1e-5	QX1792
XZ1516	0.624136	F	TRUE	H	0.201065	XZ1516
ECA738	0.720652	E	TRUE	H	1e-5	ECA738
ECA372	0.766152	E	TRUE	H	1e-5	ECA372
ECA189	0.842304	E	TRUE	H	1e-5	ECA189
XZ1513	0.843273	E	TRUE	H	1e-5	XZ1513
ECA743	0.84473	E	TRUE	H	1e-5	ECA743
QX1794	0.855294	E	TRUE	H	1e-5	QX1794
ECA706	0.856741	A	TRUE	H	1.6e-5	ECA706
QX1793	0.875683	E	TRUE	H	1.2e-5	QX1793
ECA710	0.928485	E	TRUE	H	1e-5	ECA710
ECA724	0.991476	F	TRUE	H	1e-5	ECA724
ECA742	0.999881	F	TRUE	H	1.6e-5	ECA742
ECA723	0.999884	H	TRUE	H	0.999884	ECA723
XZ1514	0.999894	F	TRUE	H	1e-5	XZ1514
ECA740	0.999895	F	TRUE	H	1e-5	ECA740
ECA777	0.999896	E	TRUE	H	1e-5	ECA777
ECA778	0.999896	E	TRUE	H	1e-5	ECA778
DL238	0.999898	A	TRUE	H	1e-5	DL238
ECA741	0.999898	F	TRUE	H	1.2e-5	ECA741
ECA745	0.999898	H	TRUE	H	0.999898	ECA745
ECA768	0.999899	E	TRUE	H	1e-5	ECA768
ECA812	0.999899	E	TRUE	H	1.1e-5	ECA812
CB4856	0.9999	A	TRUE	H	1e-5	CB4856
ECA191	0.9999	H	TRUE	H	0.9999	ECA191
ECA347	0.9999	F	TRUE	H	1e-5	ECA347
ECA363	0.9999	F	TRUE	H	1e-5	ECA363
ECA369	0.9999	A	TRUE	H	1e-5	ECA369
ECA396	0.9999	H	TRUE	H	0.9999	ECA396
ECA703	0.9999	A	TRUE	H	1e-5	ECA703
ECA705	0.9999	E	TRUE	H	1e-5	ECA705
ECA712	0.9999	E	TRUE	H	1e-5	ECA712
ECA722	0.9999	H	TRUE	H	0.9999	ECA722
ECA730	0.9999	H	TRUE	H	0.9999	ECA730
ECA732	0.9999	A	TRUE	H	1e-5	ECA732
ECA733	0.9999	A	TRUE	H	1e-5	ECA733
ECA744	0.9999	H	TRUE	H	0.9999	ECA744
ECA746	0.9999	H	TRUE	H	0.9999	ECA746
ECA760	0.9999	E	TRUE	H	1e-5	ECA760
ECA807	0.9999	E	TRUE	H	1e-5	ECA807
QX1791	0.559108	A	TRUE	I	1e-5	QX1791
XZ1515	0.569182	E	TRUE	I	1e-5	XZ1515
ECA701	0.58748	F	TRUE	I	1e-5	ECA701
QX1792	0.617955	E	TRUE	I	1e-5	QX1792
XZ1516	0.624136	F	TRUE	I	1e-5	XZ1516
ECA738	0.720652	E	TRUE	I	1e-5	ECA738
ECA372	0.766152	E	TRUE	I	1e-5	ECA372
ECA189	0.842304	E	TRUE	I	1e-5	ECA189
XZ1513	0.843273	E	TRUE	I	1e-5	XZ1513
ECA743	0.84473	E	TRUE	I	0.032585	ECA743
QX1794	0.855294	E	TRUE	I	1e-5	QX1794
ECA706	0.856741	A	TRUE	I	1e-5	ECA706
QX1793	0.875683	E	TRUE	I	1e-5	QX1793
ECA710	0.928485	E	TRUE	I	1e-5	ECA710
ECA724	0.991476	F	TRUE	I	1e-5	ECA724
ECA742	0.999881	F	TRUE	I	1e-5	ECA742
ECA723	0.999884	H	TRUE	I	1.7e-5	ECA723
XZ1514	0.999894	F	TRUE	I	1.3e-5	XZ1514
ECA740	0.999895	F	TRUE	I	1.5e-5	ECA740
ECA777	0.999896	E	TRUE	I	1.4e-5	ECA777
ECA778	0.999896	E	TRUE	I	1.4e-5	ECA778
DL238	0.999898	A	TRUE	I	1.2e-5	DL238
ECA741	0.999898	F	TRUE	I	1e-5	ECA741
ECA745	0.999898	H	TRUE	I	1e-5	ECA745
ECA768	0.999899	E	TRUE	I	1e-5	ECA768
ECA812	0.999899	E	TRUE	I	1e-5	ECA812
CB4856	0.9999	A	TRUE	I	1e-5	CB4856
ECA191	0.9999	H	TRUE	I	1e-5	ECA191
ECA347	0.9999	F	TRUE	I	1e-5	ECA347
ECA363	0.9999	F	TRUE	I	1e-5	ECA363
ECA369	0.9999	A	TRUE	I	1e-5	ECA369
ECA396	0.9999	H	TRUE	I	1e-5	ECA396
ECA703	0.9999	A	TRUE	I	1e-5	ECA703
ECA705	0.9999	E	TRUE	I	1e-5	ECA705
ECA712	0.9999	E	TRUE	I	1e-5	ECA712
ECA722	0.9999	H	TRUE	I	1e-5	ECA722
ECA730	0.9999	H	TRUE	I	1e-5	ECA730
ECA732	0.9999	A	TRUE	I	1e-5	ECA732
ECA733	0.9999	A	TRUE	I	1e-5	ECA733
ECA744	0.9999	H	TRUE	I	1e-5	ECA744
ECA746	0.9999	H	TRUE	I	1e-5	ECA746
ECA760	0.9999	E	TRUE	I	1e-5	ECA760
ECA807	0.9999	E	TRUE	I	1e-5	ECA807
QX1791	0.559108	A	TRUE	J	1e-5	QX1791
XZ1515	0.569182	E	TRUE	J	1e-5	XZ1515
ECA701	0.58748	F	TRUE	J	1e-5	ECA701
QX1792	0.617955	E	TRUE	J	0.161508	QX1792
XZ1516	0.624136	F	TRUE	J	1e-5	XZ1516
ECA738	0.720652	E	TRUE	J	1e-5	ECA738
ECA372	0.766152	E	TRUE	J	0.001477	ECA372
ECA189	0.842304	E	TRUE	J	1e-5	ECA189
XZ1513	0.843273	E	TRUE	J	1e-5	XZ1513
ECA743	0.84473	E	TRUE	J	1e-5	ECA743
QX1794	0.855294	E	TRUE	J	1e-5	QX1794
ECA706	0.856741	A	TRUE	J	1e-5	ECA706
QX1793	0.875683	E	TRUE	J	0.124224	QX1793
ECA710	0.928485	E	TRUE	J	1e-5	ECA710
ECA724	0.991476	F	TRUE	J	1e-5	ECA724
ECA742	0.999881	F	TRUE	J	1.8e-5	ECA742
ECA723	0.999884	H	TRUE	J	1e-5	ECA723
XZ1514	0.999894	F	TRUE	J	1e-5	XZ1514
ECA740	0.999895	F	TRUE	J	1e-5	ECA740
ECA777	0.999896	E	TRUE	J	1e-5	ECA777
ECA778	0.999896	E	TRUE	J	1e-5	ECA778
DL238	0.999898	A	TRUE	J	1e-5	DL238
ECA741	0.999898	F	TRUE	J	1e-5	ECA741
ECA745	0.999898	H	TRUE	J	1e-5	ECA745
ECA768	0.999899	E	TRUE	J	1e-5	ECA768
ECA812	0.999899	E	TRUE	J	1e-5	ECA812
CB4856	0.9999	A	TRUE	J	1e-5	CB4856
ECA191	0.9999	H	TRUE	J	1e-5	ECA191
ECA347	0.9999	F	TRUE	J	1e-5	ECA347
ECA363	0.9999	F	TRUE	J	1e-5	ECA363
ECA369	0.9999	A	TRUE	J	1e-5	ECA369
ECA396	0.9999	H	TRUE	J	1e-5	ECA396
ECA703	0.9999	A	TRUE	J	1e-5	ECA703
ECA705	0.9999	E	TRUE	J	1e-5	ECA705
ECA712	0.9999	E	TRUE	J	1e-5	ECA712
ECA722	0.9999	H	TRUE	J	1e-5	ECA722
ECA730	0.9999	H	TRUE	J	1e-5	ECA730
ECA732	0.9999	A	TRUE	J	1e-5	ECA732
ECA733	0.9999	A	TRUE	J	1e-5	ECA733
ECA744	0.9999	H	TRUE	J	1e-5	ECA744
ECA746	0.9999	H	TRUE	J	1e-5	ECA746
ECA760	0.9999	E	TRUE	J	1e-5	ECA760
ECA807	0.9999	E	TRUE	J	1e-5	ECA807
QX1791	0.559108	A	TRUE	K	0.134366	QX1791
XZ1515	0.569182	E	TRUE	K	1e-5	XZ1515
ECA701	0.58748	F	TRUE	K	1e-5	ECA701
QX1792	0.617955	E	TRUE	K	1e-5	QX1792
XZ1516	0.624136	F	TRUE	K	1e-5	XZ1516
ECA738	0.720652	E	TRUE	K	1e-5	ECA738
ECA372	0.766152	E	TRUE	K	1e-5	ECA372
ECA189	0.842304	E	TRUE	K	1e-5	ECA189
XZ1513	0.843273	E	TRUE	K	1e-5	XZ1513
ECA743	0.84473	E	TRUE	K	1e-5	ECA743
QX1794	0.855294	E	TRUE	K	1e-5	QX1794
ECA706	0.856741	A	TRUE	K	1e-5	ECA706
QX1793	0.875683	E	TRUE	K	1e-5	QX1793
ECA710	0.928485	E	TRUE	K	1e-5	ECA710
ECA724	0.991476	F	TRUE	K	1e-5	ECA724
ECA742	0.999881	F	TRUE	K	1e-5	ECA742
ECA723	0.999884	H	TRUE	K	1e-5	ECA723
XZ1514	0.999894	F	TRUE	K	1e-5	XZ1514
ECA740	0.999895	F	TRUE	K	1e-5	ECA740
ECA777	0.999896	E	TRUE	K	1e-5	ECA777
ECA778	0.999896	E	TRUE	K	1e-5	ECA778
DL238	0.999898	A	TRUE	K	1e-5	DL238
ECA741	0.999898	F	TRUE	K	1e-5	ECA741
ECA745	0.999898	H	TRUE	K	1e-5	ECA745
ECA768	0.999899	E	TRUE	K	1e-5	ECA768
ECA812	0.999899	E	TRUE	K	1e-5	ECA812
CB4856	0.9999	A	TRUE	K	1e-5	CB4856
ECA191	0.9999	H	TRUE	K	1e-5	ECA191
ECA347	0.9999	F	TRUE	K	1e-5	ECA347
ECA363	0.9999	F	TRUE	K	1e-5	ECA363
ECA369	0.9999	A	TRUE	K	1e-5	ECA369
ECA396	0.9999	H	TRUE	K	1e-5	ECA396
ECA703	0.9999	A	TRUE	K	1e-5	ECA703
ECA705	0.9999	E	TRUE	K	1e-5	ECA705
ECA712	0.9999	E	TRUE	K	1e-5	ECA712
ECA722	0.9999	H	TRUE	K	1e-5	ECA722
ECA730	0.9999	H	TRUE	K	1e-5	ECA730
ECA732	0.9999	A	TRUE	K	1e-5	ECA732
ECA733	0.9999	A	TRUE	K	1e-5	ECA733
ECA744	0.9999	H	TRUE	K	1e-5	ECA744
ECA746	0.9999	H	TRUE	K	1e-5	ECA746
ECA760	0.9999	E	TRUE	K	1e-5	ECA760
ECA807	0.9999	E	TRUE	K	1e-5	ECA807
