# Supplementary material for: Deep sampling of Hawaiian Caenorhabditis elegans reveals high genetic diversity and admixture with global populations
Source: eLife journal article supplement (doi:10.7554/elife.50465), 2019-12-03
Supplement: supp [file elife-50465-supp-v1.zip › elife_poa_e50465_Figure_6_source_data_2.csv]

lat	long	c_label	gridsect_number	fixed_substrate	isotype	sub_pop	env_par	value	filter_20m	kalopa	volcano_1	volcano_2	maui	kauai	geo_cluster	mean_value_20m	value_thinned
21.13927631	-156.9740559	C-0736	NA	Flower	ECA738	E	altitude	669	FALSE	FALSE	FALSE	FALSE	FALSE	FALSE	NA	995.6	669
20.670022	-156.339189	C-1142	NA	Fruit/nut/veg	ECA740	F	altitude	1778.986667	FALSE	FALSE	FALSE	FALSE	FALSE	FALSE	NA	1417.6133158571429	1778.986667
22.123283	-159.656428	C-1175	NA	Flower	ECA701	F	altitude	1163.896104	FALSE	FALSE	FALSE	FALSE	FALSE	FALSE	NA	1417.6133158571429	1163.896104
20.6762	-156.338322	C-1329	NA	Fruit/nut/veg	ECA741	F	altitude	1724.617647	FALSE	FALSE	FALSE	FALSE	FALSE	FALSE	NA	1417.6133158571429	1724.617647
20.741871	-156.32317	C-1480	NA	Flower	ECA743	E	altitude	1043	FALSE	FALSE	FALSE	FALSE	FALSE	FALSE	NA	995.6	1043
19.92253451	-155.7052173	C-1489	NA	Leaf litter	ECA742	F	altitude	1170	FALSE	FALSE	FALSE	FALSE	FALSE	FALSE	NA	1417.6133158571429	1170
19.719231	-155.949572	C-2677	NA	Leaf litter	ECA744	H	altitude	992.3670886	FALSE	FALSE	FALSE	FALSE	FALSE	FALSE	NA	890.74065575	992.3670886
19.424272	-155.221661	C-2805	NA	Leaf litter	ECA723	H	altitude	1114.484375	FALSE	FALSE	FALSE	TRUE	FALSE	FALSE	volcano_2	1118.7421875	1114.484375
20.039858	-155.441608	C-2824	3	Fruit/nut/veg	ECA760	E	altitude	670.8930041	TRUE	TRUE	FALSE	FALSE	FALSE	FALSE	kalopa	663.5472094444444	663.5472094444444
19.700464	-155.955839	C-2865	NA	Leaf litter	ECA745	H	altitude	789.2913386	FALSE	FALSE	FALSE	FALSE	FALSE	FALSE	NA	890.74065575	789.2913386
19.439144	-155.303825	C-3007	NA	Leaf litter	ECA724	F	altitude	1206.792793	FALSE	FALSE	FALSE	FALSE	FALSE	FALSE	NA	1417.6133158571429	1206.792793
19.423869	-155.222483	C-3058	1	Leaf litter	ECA730	H	altitude	1121.234234	TRUE	FALSE	TRUE	FALSE	FALSE	FALSE	volcano_1	1120.4043510000001	1120.4043510000001
19.423864	-155.222478	C-3097	1	Leaf litter	ECA712	E	altitude	1119.876923	TRUE	FALSE	TRUE	FALSE	FALSE	FALSE	volcano_1	1122.9384615	1122.9384615
20.038831	-155.438922	C-3133	NA	Leaf litter	ECA703	A	altitude	649.9944751	FALSE	TRUE	FALSE	FALSE	FALSE	FALSE	kalopa	649.9944751	649.9944751
20.038831	-155.438922	C-3133	NA	Leaf litter	ECA705	E	altitude	649.9944751	FALSE	TRUE	FALSE	FALSE	FALSE	FALSE	kalopa	653.1624918	649.9944751
20.039656	-155.438103	C-3178	NA	Leaf litter	ECA710	E	altitude	656.3305085	FALSE	TRUE	FALSE	FALSE	FALSE	FALSE	kalopa	653.1624918	656.3305085
19.115403	-155.81845	C-3264	NA	Leaf litter	ECA732	A	altitude	655.7813765	FALSE	FALSE	FALSE	FALSE	FALSE	FALSE	NA	602.12197455	655.7813765
19.115886	-155.818386	C-3266	NA	Other	ECA733	A	altitude	651.7065217	FALSE	FALSE	FALSE	FALSE	FALSE	FALSE	NA	602.12197455	651.7065217
19.115292	-155.819336	C-3270	NA	Leaf litter	ECA746	H	altitude	640.3041958	FALSE	FALSE	FALSE	FALSE	FALSE	FALSE	NA	890.74065575	640.3041958
21.33	-157.86	1	NA	Fruit/nut/veg	CB4856	A	altitude	NA	FALSE	FALSE	FALSE	FALSE	FALSE	FALSE	NA	602.12197455	NA
20.6344	-156.3935	3	NA	Other	QX1791	A	altitude	610	FALSE	FALSE	FALSE	FALSE	FALSE	FALSE	NA	602.12197455	610
20.70554	-156.35475	4	NA	Fruit/nut/veg	QX1792	E	altitude	882	FALSE	FALSE	FALSE	FALSE	FALSE	FALSE	NA	995.6	882
20.70559	-156.35678	5	NA	Compost	QX1793	E	altitude	865	TRUE	FALSE	FALSE	FALSE	TRUE	FALSE	maui	865	865
19.424167	-155.221944	8	NA	Flower	ECA191	H	altitude	1123	FALSE	FALSE	FALSE	TRUE	FALSE	FALSE	volcano_2	1118.7421875	1123
22.14787	-159.63105	9	NA	Fruit/nut/veg	XZ1513	E	altitude	1263	FALSE	FALSE	FALSE	FALSE	FALSE	FALSE	NA	995.6	1263
22.149	-159.668	10	NA	Fruit/nut/veg	XZ1514	F	altitude	979	TRUE	FALSE	FALSE	FALSE	FALSE	TRUE	kauai	979	979
22.149	-159.668	11	NA	Fruit/nut/veg	XZ1515	E	altitude	979	TRUE	FALSE	FALSE	FALSE	FALSE	TRUE	kauai	979	979
20.723611	-156.304444	13	NA	Leaf litter	ECA363	F	altitude	1653	FALSE	FALSE	FALSE	FALSE	FALSE	FALSE	NA	1417.6133158571429	1653
21.175556	-157.006389	14	NA	Leaf litter	ECA369	A	altitude	491	FALSE	FALSE	FALSE	FALSE	FALSE	FALSE	NA	602.12197455	491
22.121667	-159.664444	15	NA	Leaf litter	ECA372	E	altitude	1121	FALSE	FALSE	FALSE	FALSE	FALSE	FALSE	NA	995.6	1121
19.449831	-155.235493	16	NA	Fruit/nut/veg	ECA396	H	altitude	1141	FALSE	FALSE	FALSE	FALSE	FALSE	FALSE	NA	890.74065575	1141
19.438889	-155.303611	17	NA	Leaf litter	ECA347	F	altitude	1226	FALSE	FALSE	FALSE	FALSE	FALSE	FALSE	NA	1417.6133158571429	1226
21.13927631	-156.9740559	C-0736	NA	Flower	ECA738	E	ambient_temperature	24.7	FALSE	FALSE	FALSE	FALSE	FALSE	FALSE	NA	24.799999999999997	24.7
20.670022	-156.339189	C-1142	NA	Fruit/nut/veg	ECA740	F	ambient_temperature	19.2	FALSE	FALSE	FALSE	FALSE	FALSE	FALSE	NA	21.16	19.2
22.123283	-159.656428	C-1175	NA	Flower	ECA701	F	ambient_temperature	21.9	FALSE	FALSE	FALSE	FALSE	FALSE	FALSE	NA	21.16	21.9
20.6762	-156.338322	C-1329	NA	Fruit/nut/veg	ECA741	F	ambient_temperature	18.5	FALSE	FALSE	FALSE	FALSE	FALSE	FALSE	NA	21.16	18.5
20.741871	-156.32317	C-1480	NA	Flower	ECA743	E	ambient_temperature	24.9	FALSE	FALSE	FALSE	FALSE	FALSE	FALSE	NA	24.799999999999997	24.9
19.92253451	-155.7052173	C-1489	NA	Leaf litter	ECA742	F	ambient_temperature	22.9	FALSE	FALSE	FALSE	FALSE	FALSE	FALSE	NA	21.16	22.9
19.719231	-155.949572	C-2677	NA	Leaf litter	ECA744	H	ambient_temperature	23.333333333333336	FALSE	FALSE	FALSE	FALSE	FALSE	FALSE	NA	22.855555555555558	23.333333333333336
19.424272	-155.221661	C-2805	NA	Leaf litter	ECA723	H	ambient_temperature	20.5	FALSE	FALSE	FALSE	TRUE	FALSE	FALSE	volcano_2	20.5	20.5
20.039858	-155.441608	C-2824	3	Fruit/nut/veg	ECA760	E	ambient_temperature	22.6	TRUE	TRUE	FALSE	FALSE	FALSE	FALSE	kalopa	22.764705882352942	22.764705882352942
19.700464	-155.955839	C-2865	NA	Leaf litter	ECA745	H	ambient_temperature	21.9	FALSE	FALSE	FALSE	FALSE	FALSE	FALSE	NA	22.855555555555558	21.9
19.439144	-155.303825	C-3007	NA	Leaf litter	ECA724	F	ambient_temperature	23.3	FALSE	FALSE	FALSE	FALSE	FALSE	FALSE	NA	21.16	23.3
19.423869	-155.222483	C-3058	1	Leaf litter	ECA730	H	ambient_temperature	18.4	TRUE	FALSE	TRUE	FALSE	FALSE	FALSE	volcano_1	18.45	18.45
19.423864	-155.222478	C-3097	1	Leaf litter	ECA712	E	ambient_temperature	18.5	TRUE	FALSE	TRUE	FALSE	FALSE	FALSE	volcano_1	18.5	18.5
20.038831	-155.438922	C-3133	NA	Leaf litter	ECA703	A	ambient_temperature	23.3	FALSE	TRUE	FALSE	FALSE	FALSE	FALSE	kalopa	23.3	23.3
20.038831	-155.438922	C-3133	NA	Leaf litter	ECA705	E	ambient_temperature	23.3	FALSE	TRUE	FALSE	FALSE	FALSE	FALSE	kalopa	22.6	23.3
20.039656	-155.438103	C-3178	NA	Leaf litter	ECA710	E	ambient_temperature	21.9	FALSE	TRUE	FALSE	FALSE	FALSE	FALSE	kalopa	22.6	21.9
19.115403	-155.81845	C-3264	NA	Leaf litter	ECA732	A	ambient_temperature	26	FALSE	FALSE	FALSE	FALSE	FALSE	FALSE	NA	25.694444444444446	26
19.115886	-155.818386	C-3266	NA	Other	ECA733	A	ambient_temperature	25.388888888888893	FALSE	FALSE	FALSE	FALSE	FALSE	FALSE	NA	25.694444444444446	25.388888888888893
21.33	-157.86	1	NA	Fruit/nut/veg	CB4856	A	ambient_temperature	NA	FALSE	FALSE	FALSE	FALSE	FALSE	FALSE	NA	25.694444444444446	NA
20.70554	-156.35475	4	NA	Fruit/nut/veg	QX1792	E	ambient_temperature	NA	FALSE	FALSE	FALSE	FALSE	FALSE	FALSE	NA	24.799999999999997	NA
20.70559	-156.35678	5	NA	Compost	QX1793	E	ambient_temperature	NA	TRUE	FALSE	FALSE	FALSE	TRUE	FALSE	maui	NaN	NaN
19.424167	-155.221944	8	NA	Flower	ECA191	H	ambient_temperature	NA	FALSE	FALSE	FALSE	TRUE	FALSE	FALSE	volcano_2	20.5	NA
22.149	-159.668	10	NA	Fruit/nut/veg	XZ1514	F	ambient_temperature	NA	TRUE	FALSE	FALSE	FALSE	FALSE	TRUE	kauai	NaN	NaN
22.149	-159.668	11	NA	Fruit/nut/veg	XZ1515	E	ambient_temperature	NA	TRUE	FALSE	FALSE	FALSE	FALSE	TRUE	kauai	NaN	NaN
20.723611	-156.304444	13	NA	Leaf litter	ECA363	F	ambient_temperature	NA	FALSE	FALSE	FALSE	FALSE	FALSE	FALSE	NA	21.16	NA
19.449831	-155.235493	16	NA	Fruit/nut/veg	ECA396	H	ambient_temperature	NA	FALSE	FALSE	FALSE	FALSE	FALSE	FALSE	NA	22.855555555555558	NA
21.13927631	-156.9740559	C-0736	NA	Flower	ECA738	E	substrate_temperature	22.4	FALSE	FALSE	FALSE	FALSE	FALSE	FALSE	NA	21.549999999999997	22.4
20.670022	-156.339189	C-1142	NA	Fruit/nut/veg	ECA740	F	substrate_temperature	16.9	FALSE	FALSE	FALSE	FALSE	FALSE	FALSE	NA	18.099999999999998	16.9
22.123283	-159.656428	C-1175	NA	Flower	ECA701	F	substrate_temperature	19.2	FALSE	FALSE	FALSE	FALSE	FALSE	FALSE	NA	18.099999999999998	19.2
20.6762	-156.338322	C-1329	NA	Fruit/nut/veg	ECA741	F	substrate_temperature	18.2	FALSE	FALSE	FALSE	FALSE	FALSE	FALSE	NA	18.099999999999998	18.2
20.741871	-156.32317	C-1480	NA	Flower	ECA743	E	substrate_temperature	20.7	FALSE	FALSE	FALSE	FALSE	FALSE	FALSE	NA	21.549999999999997	20.7
19.719231	-155.949572	C-2677	NA	Leaf litter	ECA744	H	substrate_temperature	17.5	FALSE	FALSE	FALSE	FALSE	FALSE	FALSE	NA	18.866666666666667	17.5
19.424272	-155.221661	C-2805	NA	Leaf litter	ECA723	H	substrate_temperature	18	FALSE	FALSE	FALSE	TRUE	FALSE	FALSE	volcano_2	18	18
20.039858	-155.441608	C-2824	3	Fruit/nut/veg	ECA760	E	substrate_temperature	20.6	TRUE	TRUE	FALSE	FALSE	FALSE	FALSE	kalopa	20.488888888888887	20.488888888888887
19.700464	-155.955839	C-2865	NA	Leaf litter	ECA745	H	substrate_temperature	20.6	FALSE	FALSE	FALSE	FALSE	FALSE	FALSE	NA	18.866666666666667	20.6
19.439144	-155.303825	C-3007	NA	Leaf litter	ECA724	F	substrate_temperature	18	FALSE	FALSE	FALSE	FALSE	FALSE	FALSE	NA	18.099999999999998	18
19.423869	-155.222483	C-3058	1	Leaf litter	ECA730	H	substrate_temperature	15	TRUE	FALSE	TRUE	FALSE	FALSE	FALSE	volcano_1	14.85	14.85
19.423864	-155.222478	C-3097	1	Leaf litter	ECA712	E	substrate_temperature	15.4	TRUE	FALSE	TRUE	FALSE	FALSE	FALSE	volcano_1	15.4	15.4
20.038831	-155.438922	C-3133	NA	Leaf litter	ECA703	A	substrate_temperature	18.7	FALSE	TRUE	FALSE	FALSE	FALSE	FALSE	kalopa	18.7	18.7
20.038831	-155.438922	C-3133	NA	Leaf litter	ECA705	E	substrate_temperature	18.7	FALSE	TRUE	FALSE	FALSE	FALSE	FALSE	kalopa	19.6	18.7
20.039656	-155.438103	C-3178	NA	Leaf litter	ECA710	E	substrate_temperature	20.5	FALSE	TRUE	FALSE	FALSE	FALSE	FALSE	kalopa	19.6	20.5
19.115403	-155.81845	C-3264	NA	Leaf litter	ECA732	A	substrate_temperature	23.3	FALSE	FALSE	FALSE	FALSE	FALSE	FALSE	NA	21.85	23.3
19.115886	-155.818386	C-3266	NA	Other	ECA733	A	substrate_temperature	20.4	FALSE	FALSE	FALSE	FALSE	FALSE	FALSE	NA	21.85	20.4
19.115292	-155.819336	C-3270	NA	Leaf litter	ECA746	H	substrate_temperature	18.5	FALSE	FALSE	FALSE	FALSE	FALSE	FALSE	NA	18.866666666666667	18.5
21.33	-157.86	1	NA	Fruit/nut/veg	CB4856	A	substrate_temperature	NA	FALSE	FALSE	FALSE	FALSE	FALSE	FALSE	NA	21.85	NA
20.70554	-156.35475	4	NA	Fruit/nut/veg	QX1792	E	substrate_temperature	NA	FALSE	FALSE	FALSE	FALSE	FALSE	FALSE	NA	21.549999999999997	NA
20.70559	-156.35678	5	NA	Compost	QX1793	E	substrate_temperature	NA	TRUE	FALSE	FALSE	FALSE	TRUE	FALSE	maui	NaN	NaN
19.424167	-155.221944	8	NA	Flower	ECA191	H	substrate_temperature	NA	FALSE	FALSE	FALSE	TRUE	FALSE	FALSE	volcano_2	18	NA
22.149	-159.668	10	NA	Fruit/nut/veg	XZ1514	F	substrate_temperature	NA	TRUE	FALSE	FALSE	FALSE	FALSE	TRUE	kauai	NaN	NaN
22.149	-159.668	11	NA	Fruit/nut/veg	XZ1515	E	substrate_temperature	NA	TRUE	FALSE	FALSE	FALSE	FALSE	TRUE	kauai	NaN	NaN
20.723611	-156.304444	13	NA	Leaf litter	ECA363	F	substrate_temperature	NA	FALSE	FALSE	FALSE	FALSE	FALSE	FALSE	NA	18.099999999999998	NA
19.449831	-155.235493	16	NA	Fruit/nut/veg	ECA396	H	substrate_temperature	NA	FALSE	FALSE	FALSE	FALSE	FALSE	FALSE	NA	18.866666666666667	NA
21.13927631	-156.9740559	C-0736	NA	Flower	ECA738	E	ambient_humidity	70.6	FALSE	FALSE	FALSE	FALSE	FALSE	FALSE	NA	67.94999999999999	70.6
20.670022	-156.339189	C-1142	NA	Fruit/nut/veg	ECA740	F	ambient_humidity	80.4	FALSE	FALSE	FALSE	FALSE	FALSE	FALSE	NA	77.14	80.4
22.123283	-159.656428	C-1175	NA	Flower	ECA701	F	ambient_humidity	79.9	FALSE	FALSE	FALSE	FALSE	FALSE	FALSE	NA	77.14	79.9
20.6762	-156.338322	C-1329	NA	Fruit/nut/veg	ECA741	F	ambient_humidity	90.1	FALSE	FALSE	FALSE	FALSE	FALSE	FALSE	NA	77.14	90.1
20.741871	-156.32317	C-1480	NA	Flower	ECA743	E	ambient_humidity	65.3	FALSE	FALSE	FALSE	FALSE	FALSE	FALSE	NA	67.94999999999999	65.3
19.92253451	-155.7052173	C-1489	NA	Leaf litter	ECA742	F	ambient_humidity	67.3	FALSE	FALSE	FALSE	FALSE	FALSE	FALSE	NA	77.14	67.3
19.719231	-155.949572	C-2677	NA	Leaf litter	ECA744	H	ambient_humidity	80	FALSE	FALSE	FALSE	FALSE	FALSE	FALSE	NA	82.73333333333333	80
19.424272	-155.221661	C-2805	NA	Leaf litter	ECA723	H	ambient_humidity	82	FALSE	FALSE	FALSE	TRUE	FALSE	FALSE	volcano_2	82	82
20.039858	-155.441608	C-2824	3	Fruit/nut/veg	ECA760	E	ambient_humidity	83.1	TRUE	TRUE	FALSE	FALSE	FALSE	FALSE	kalopa	81.22941176470589	81.22941176470589
19.700464	-155.955839	C-2865	NA	Leaf litter	ECA745	H	ambient_humidity	82.6	FALSE	FALSE	FALSE	FALSE	FALSE	FALSE	NA	82.73333333333333	82.6
19.439144	-155.303825	C-3007	NA	Leaf litter	ECA724	F	ambient_humidity	68	FALSE	FALSE	FALSE	FALSE	FALSE	FALSE	NA	77.14	68
19.423869	-155.222483	C-3058	1	Leaf litter	ECA730	H	ambient_humidity	94	TRUE	FALSE	TRUE	FALSE	FALSE	FALSE	volcano_1	94	94
19.423864	-155.222478	C-3097	1	Leaf litter	ECA712	E	ambient_humidity	94	TRUE	FALSE	TRUE	FALSE	FALSE	FALSE	volcano_1	94	94
20.038831	-155.438922	C-3133	NA	Leaf litter	ECA703	A	ambient_humidity	75	FALSE	TRUE	FALSE	FALSE	FALSE	FALSE	kalopa	75	75
20.038831	-155.438922	C-3133	NA	Leaf litter	ECA705	E	ambient_humidity	75	FALSE	TRUE	FALSE	FALSE	FALSE	FALSE	kalopa	75.25	75
20.039656	-155.438103	C-3178	NA	Leaf litter	ECA710	E	ambient_humidity	75.5	FALSE	TRUE	FALSE	FALSE	FALSE	FALSE	kalopa	75.25	75.5
19.115403	-155.81845	C-3264	NA	Leaf litter	ECA732	A	ambient_humidity	75.5	FALSE	FALSE	FALSE	FALSE	FALSE	FALSE	NA	75.9	75.5
19.115886	-155.818386	C-3266	NA	Other	ECA733	A	ambient_humidity	76.3	FALSE	FALSE	FALSE	FALSE	FALSE	FALSE	NA	75.9	76.3
19.115292	-155.819336	C-3270	NA	Leaf litter	ECA746	H	ambient_humidity	85.6	FALSE	FALSE	FALSE	FALSE	FALSE	FALSE	NA	82.73333333333333	85.6
21.33	-157.86	1	NA	Fruit/nut/veg	CB4856	A	ambient_humidity	NA	FALSE	FALSE	FALSE	FALSE	FALSE	FALSE	NA	75.9	NA
20.70554	-156.35475	4	NA	Fruit/nut/veg	QX1792	E	ambient_humidity	NA	FALSE	FALSE	FALSE	FALSE	FALSE	FALSE	NA	67.94999999999999	NA
20.70559	-156.35678	5	NA	Compost	QX1793	E	ambient_humidity	NA	TRUE	FALSE	FALSE	FALSE	TRUE	FALSE	maui	NaN	NaN
19.424167	-155.221944	8	NA	Flower	ECA191	H	ambient_humidity	NA	FALSE	FALSE	FALSE	TRUE	FALSE	FALSE	volcano_2	82	NA
22.149	-159.668	10	NA	Fruit/nut/veg	XZ1514	F	ambient_humidity	NA	TRUE	FALSE	FALSE	FALSE	FALSE	TRUE	kauai	NaN	NaN
22.149	-159.668	11	NA	Fruit/nut/veg	XZ1515	E	ambient_humidity	NA	TRUE	FALSE	FALSE	FALSE	FALSE	TRUE	kauai	NaN	NaN
20.723611	-156.304444	13	NA	Leaf litter	ECA363	F	ambient_humidity	NA	FALSE	FALSE	FALSE	FALSE	FALSE	FALSE	NA	77.14	NA
19.449831	-155.235493	16	NA	Fruit/nut/veg	ECA396	H	ambient_humidity	NA	FALSE	FALSE	FALSE	FALSE	FALSE	FALSE	NA	82.73333333333333	NA
21.13927631	-156.9740559	C-0736	NA	Flower	ECA738	E	substrate_moisture	66.5	FALSE	FALSE	FALSE	FALSE	FALSE	FALSE	NA	46	66.5
20.670022	-156.339189	C-1142	NA	Fruit/nut/veg	ECA740	F	substrate_moisture	73.5	FALSE	FALSE	FALSE	FALSE	FALSE	FALSE	NA	59	73.5
22.123283	-159.656428	C-1175	NA	Flower	ECA701	F	substrate_moisture	NA	FALSE	FALSE	FALSE	FALSE	FALSE	FALSE	NA	59	NA
20.6762	-156.338322	C-1329	NA	Fruit/nut/veg	ECA741	F	substrate_moisture	68.5	FALSE	FALSE	FALSE	FALSE	FALSE	FALSE	NA	59	68.5
20.741871	-156.32317	C-1480	NA	Flower	ECA743	E	substrate_moisture	25.5	FALSE	FALSE	FALSE	FALSE	FALSE	FALSE	NA	46	25.5
19.92253451	-155.7052173	C-1489	NA	Leaf litter	ECA742	F	substrate_moisture	30	FALSE	FALSE	FALSE	FALSE	FALSE	FALSE	NA	59	30
19.719231	-155.949572	C-2677	NA	Leaf litter	ECA744	H	substrate_moisture	66.5	FALSE	FALSE	FALSE	FALSE	FALSE	FALSE	NA	51.833333333333336	66.5
19.424272	-155.221661	C-2805	NA	Leaf litter	ECA723	H	substrate_moisture	70.5	FALSE	FALSE	FALSE	TRUE	FALSE	FALSE	volcano_2	70.5	70.5
20.039858	-155.441608	C-2824	3	Fruit/nut/veg	ECA760	E	substrate_moisture	NA	TRUE	TRUE	FALSE	FALSE	FALSE	FALSE	kalopa	68.28571428571429	68.28571428571429
19.700464	-155.955839	C-2865	NA	Leaf litter	ECA745	H	substrate_moisture	36	FALSE	FALSE	FALSE	FALSE	FALSE	FALSE	NA	51.833333333333336	36
19.439144	-155.303825	C-3007	NA	Leaf litter	ECA724	F	substrate_moisture	64	FALSE	FALSE	FALSE	FALSE	FALSE	FALSE	NA	59	64
19.423869	-155.222483	C-3058	1	Leaf litter	ECA730	H	substrate_moisture	NA	TRUE	FALSE	TRUE	FALSE	FALSE	FALSE	volcano_1	70	70
19.423864	-155.222478	C-3097	1	Leaf litter	ECA712	E	substrate_moisture	71.5	TRUE	FALSE	TRUE	FALSE	FALSE	FALSE	volcano_1	71.5	71.5
20.038831	-155.438922	C-3133	NA	Leaf litter	ECA703	A	substrate_moisture	65	FALSE	TRUE	FALSE	FALSE	FALSE	FALSE	kalopa	65	65
20.038831	-155.438922	C-3133	NA	Leaf litter	ECA705	E	substrate_moisture	65	FALSE	TRUE	FALSE	FALSE	FALSE	FALSE	kalopa	64.5	65
20.039656	-155.438103	C-3178	NA	Leaf litter	ECA710	E	substrate_moisture	64	FALSE	TRUE	FALSE	FALSE	FALSE	FALSE	kalopa	64.5	64
19.115403	-155.81845	C-3264	NA	Leaf litter	ECA732	A	substrate_moisture	62	FALSE	FALSE	FALSE	FALSE	FALSE	FALSE	NA	52	62
19.115886	-155.818386	C-3266	NA	Other	ECA733	A	substrate_moisture	42	FALSE	FALSE	FALSE	FALSE	FALSE	FALSE	NA	52	42
19.115292	-155.819336	C-3270	NA	Leaf litter	ECA746	H	substrate_moisture	53	FALSE	FALSE	FALSE	FALSE	FALSE	FALSE	NA	51.833333333333336	53
21.33	-157.86	1	NA	Fruit/nut/veg	CB4856	A	substrate_moisture	NA	FALSE	FALSE	FALSE	FALSE	FALSE	FALSE	NA	52	NA
20.70554	-156.35475	4	NA	Fruit/nut/veg	QX1792	E	substrate_moisture	NA	FALSE	FALSE	FALSE	FALSE	FALSE	FALSE	NA	46	NA
20.70559	-156.35678	5	NA	Compost	QX1793	E	substrate_moisture	NA	TRUE	FALSE	FALSE	FALSE	TRUE	FALSE	maui	NaN	NaN
19.424167	-155.221944	8	NA	Flower	ECA191	H	substrate_moisture	NA	FALSE	FALSE	FALSE	TRUE	FALSE	FALSE	volcano_2	70.5	NA
22.149	-159.668	10	NA	Fruit/nut/veg	XZ1514	F	substrate_moisture	NA	TRUE	FALSE	FALSE	FALSE	FALSE	TRUE	kauai	NaN	NaN
22.149	-159.668	11	NA	Fruit/nut/veg	XZ1515	E	substrate_moisture	NA	TRUE	FALSE	FALSE	FALSE	FALSE	TRUE	kauai	NaN	NaN
19.449831	-155.235493	16	NA	Fruit/nut/veg	ECA396	H	substrate_moisture	NA	FALSE	FALSE	FALSE	FALSE	FALSE	FALSE	NA	51.833333333333336	NA
