# Supplementary material for: Deep sampling of Hawaiian Caenorhabditis elegans reveals high genetic diversity and admixture with global populations
Source: eLife journal article supplement (doi:10.7554/elife.50465), 2019-12-03
Supplement: supp [file elife-50465-supp-v1.zip › elife_poa_e50465_Figure_6_source_data_3.csv]

Comparison	Z	P.unadj	P.adj	env_par
A - E	-2.0748233112024113	0.03800291327053766	0.22801747962322597	altitude
A - F	-4.189773204676462	2.7923340163171018e-5	1.675400409790261e-4	altitude
E - F	-2.7320217667586566	0.006294698213910404	0.03776818928346242	altitude
A - H	-2.2356958698780462	0.025371699766699073	0.15223019860019443	altitude
E - H	-0.39299985469738946	0.6943195887048704	1	altitude
F - H	2.085693163958481	0.037006426069957604	0.22203855641974563	altitude
A - E	1.4416205034356044	0.14940946106258593	0.8964567663755156	ambient_temperature
A - F	2.207579470382789	0.02727360154987058	0.1636416092992235	ambient_temperature
E - F	0.9789909578001963	0.3275844473017935	1	ambient_temperature
A - H	2.197090653857924	0.028013972474036298	0.1680838348442178	ambient_temperature
E - H	1.0204165815979276	0.3075309331052254	1	ambient_temperature
F - H	0.09818963134518678	0.9217817156660042	1	ambient_temperature
A - E	0.33147534578063714	0.7402854605823841	1	substrate_temperature
A - F	1.6060395473111653	0.10826522096701761	0.6495913258021057	substrate_temperature
E - F	1.5371785710594494	0.12424958640506552	0.7454975184303931	substrate_temperature
A - H	1.6603793854268665	0.09683815455861423	0.5810289273516854	substrate_temperature
E - H	1.6154130739783186	0.10622127085584956	0.6373276251350974	substrate_temperature
F - H	-0.020964341617174004	0.9832741006874478	1	substrate_temperature
A - E	-0.23067336709451194	0.817568565542791	1	ambient_humidity
A - F	-0.357357643668254	0.7208240815103621	1	ambient_humidity
E - F	-0.161621075456335	0.8716042597006317	1	ambient_humidity
A - H	-1.8436405707430368	0.06523553927939041	0.39141323567634245	ambient_humidity
E - H	-1.9541457305175027	0.05068398520075296	0.30410391120451774	ambient_humidity
F - H	-1.7162116960771414	0.0861233032737636	0.5167398196425815	ambient_humidity
A - E	-0.9065014514756664	0.36467049697624354	1	susbtrate_moisture
A - F	-0.951840555794784	0.34117785055970995	1	susbtrate_moisture
E - F	-0.1332103470055702	0.8940270280505078	1	susbtrate_moisture
A - H	-0.9248132260654526	0.35506306962296713	1	susbtrate_moisture
E - H	-0.05680108281513401	0.9547036513708356	1	susbtrate_moisture
F - H	0.0769090297025094	0.9386959141622879	1	susbtrate_moisture
