# Supplementary material for: Deep sampling of Hawaiian Caenorhabditis elegans reveals high genetic diversity and admixture with global populations
Source: eLife journal article supplement (doi:10.7554/elife.50465), 2019-12-03
Supplement: supp [file elife-50465-supp-v1.zip › elife_poa_e50465_Figure_7_figure_supplement_2_source_data_1.csv]

chromosome	isotype	fraction_swept_haplotype_on_chromosome	pop_assignment	A	B	C	D	E	F	G	H	I	J	K	Hawaiian	genome_swept_hap_length	genome_max_length	genome_frac_swept
I	CB4853	0.7571455959628027	C	1e-5	1e-5	0.692965	0.306945	1e-5	1e-5	1e-5	1e-5	1e-5	1e-5	1e-5	FALSE	61711850	100089639	0.6165658165676869
I	CB4855	0.6055939585146962	C	1e-5	1e-5	0.815787	0.184123	1e-5	1e-5	1e-5	1e-5	1e-5	1e-5	1e-5	FALSE	51460060	100089639	0.5141397302871679
I	CB4856	0.034602695787317776	A	0.9999	1e-5	1e-5	1e-5	1e-5	1e-5	1e-5	1e-5	1e-5	1e-5	1e-5	TRUE	3347671	100089639	0.03344672868687237
I	CB4857	0.6964777132018142	C	1e-5	1e-5	0.999899	1e-5	1e-5	1.1e-5	1e-5	1e-5	1e-5	1e-5	1e-5	FALSE	55517237	100089639	0.5546751647290885
I	CB4858	0.6090668164052901	C	1e-5	1e-5	0.9999	1e-5	1e-5	1e-5	1e-5	1e-5	1e-5	1e-5	1e-5	FALSE	60689498	100089639	0.6063514526213847
I	CX11254	0.7060203584855962	C	1e-5	1e-5	0.656296	1e-5	1e-5	1e-5	1e-5	1e-5	1e-5	0.237537	0.106087	FALSE	46254220	100089639	0.4621279531240991
I	CX11262	0.3155351139754268	C	1e-5	1e-5	0.9999	1e-5	1e-5	1e-5	1e-5	1e-5	1e-5	1e-5	1e-5	FALSE	38381772	100089639	0.3834739777610747
I	CX11264	0.6431544088450946	C	1e-5	1e-5	0.9999	1e-5	1e-5	1e-5	1e-5	1e-5	1e-5	1e-5	1e-5	FALSE	34258305	100089639	0.3422762370039121
I	CX11276	0.7077573859243256	C	1e-5	0.015529	0.591298	0.185454	1e-5	1e-5	1e-5	1e-5	0.009696	0.197963	1e-5	FALSE	58350744	100089639	0.5829848582029554
I	CX11285	0.68015067936652	C	1.1e-5	1e-5	0.662305	1e-5	1e-5	1e-5	1e-5	1e-5	1e-5	0.337604	1e-5	FALSE	44207713	100089639	0.441681211378932
I	CX11292	0.6090668164052901	C	1e-5	1e-5	0.727048	0.272862	1e-5	1e-5	1e-5	1e-5	1e-5	1e-5	1e-5	FALSE	63494663	100089639	0.6343779799225772
I	CX11307	0.40806692007765255	C	1e-5	1e-5	0.59957	0.183651	1e-5	1e-5	0.038083	1e-5	0.070271	0.057709	0.050666	FALSE	40583755	100089639	0.4054740870830796
I	CX11314	0.6090668164052901	C	1e-5	1e-5	0.9999	1e-5	1e-5	1e-5	1e-5	1e-5	1e-5	1e-5	1e-5	FALSE	48269418	100089639	0.48226188526866404
I	CX11315	0.6785199177616824	C	1e-5	1e-5	0.855784	0.144126	1e-5	1e-5	1e-5	1e-5	1e-5	1e-5	1e-5	FALSE	55969862	100089639	0.5591973610775037
I	DL226	0.3788652950216851	C	1e-5	0.054011	0.722598	0.137152	1e-5	1e-5	1e-5	2e-5	1e-5	0.070261	0.015908	FALSE	52614627	100089639	0.5256750601328475
I	DL238	0.031164816512885996	A	0.999898	1e-5	1e-5	1e-5	1e-5	1e-5	1e-5	1e-5	1.2e-5	1e-5	1e-5	TRUE	2895303	100089639	0.028927100036798013
I	ECA189	0.35164521522123077	E	1e-5	1e-5	0.157606	1e-5	0.842304	1e-5	1e-5	1e-5	1e-5	1e-5	1e-5	TRUE	17389914	100089639	0.17374339815532755
I	ECA191	0.006344562377944746	H	1e-5	1e-5	1e-5	1e-5	1e-5	1e-5	1e-5	0.9999	1e-5	1e-5	1e-5	TRUE	459647	100089639	0.0045923534602817385
I	ECA347	6.526903377025793e-4	F	1e-5	1e-5	1e-5	1e-5	1e-5	0.9999	1e-5	1e-5	1e-5	1e-5	1e-5	TRUE	115824	100089639	0.0011572026950761607
I	ECA348	0.3283913513975054	C	1e-5	1e-5	0.9999	1e-5	1e-5	1e-5	1e-5	1e-5	1e-5	1e-5	1e-5	FALSE	26624958	100089639	0.26601113028292567
I	ECA349	0.5894634965223209	C	1e-5	1e-5	0.9999	1e-5	1e-5	1e-5	1e-5	1e-5	1e-5	1e-5	1e-5	FALSE	47850347	100089639	0.47807492841491817
I	ECA36	0.003449184150377726	F	1.3e-5	1.9e-5	1e-5	1e-5	1e-5	0.999888	1e-5	1e-5	1e-5	1e-5	1e-5	FALSE	302212	100089639	0.0030194134279972777
I	ECA363	6.729726151350079e-5	F	1e-5	1e-5	1e-5	1e-5	1e-5	0.9999	1e-5	1e-5	1e-5	1e-5	1e-5	TRUE	707350	100089639	0.007067165063908363
I	ECA369	0.026798540926211145	A	0.9999	1e-5	1e-5	1e-5	1e-5	1e-5	1e-5	1e-5	1e-5	1e-5	1e-5	TRUE	2317366	100089639	0.02315290596662058
I	ECA372	0.27073641757392175	E	1.8e-5	1e-5	0.232283	1e-5	0.766152	1e-5	1e-5	1e-5	1e-5	0.001477	1e-5	TRUE	14575644	100089639	0.14562590239735004
I	ECA396	0.006344562377944746	H	1e-5	1e-5	1e-5	1e-5	1e-5	1e-5	1e-5	0.9999	1e-5	1e-5	1e-5	TRUE	680265	100089639	0.006796557633702725
I	ECA701	0.003928045395593852	F	0.250814	1e-5	1e-5	1e-5	1e-5	0.58748	1e-5	0.161626	1e-5	1e-5	1e-5	TRUE	181973	100089639	0.0018181002730961993
I	ECA703	0.032390398063966847	A	0.9999	1e-5	1e-5	1e-5	1e-5	1e-5	1e-5	1e-5	1e-5	1e-5	1e-5	TRUE	5438720	100089639	0.05433849151958676
I	ECA705	0.2274225833782813	E	1e-5	1e-5	1e-5	1e-5	0.9999	1e-5	1e-5	1e-5	1e-5	1e-5	1e-5	TRUE	13230104	100089639	0.1321825528814226
I	ECA706	0.03936244755618174	A	0.856741	1e-5	1e-5	1e-5	0.143163	1e-5	1e-5	1.6e-5	1e-5	1e-5	1e-5	TRUE	6287738	100089639	0.06282106782301412
I	ECA710	0.24923966396854744	E	1e-5	1e-5	0.071425	1e-5	0.928485	1e-5	1e-5	1e-5	1e-5	1e-5	1e-5	TRUE	13461028	100089639	0.13448972475562632
I	ECA712	0.28461873873627047	E	1e-5	1e-5	1e-5	1e-5	0.9999	1e-5	1e-5	1e-5	1e-5	1e-5	1e-5	TRUE	11054263	100089639	0.11044362943501075
I	ECA722	0.0063759500335123075	H	1e-5	1e-5	1e-5	1e-5	1e-5	1e-5	1e-5	0.9999	1e-5	1e-5	1e-5	TRUE	871800	100089639	0.008710192270750422
I	ECA723	0.002061144882026637	H	1.3e-5	1.6e-5	1e-5	1e-5	1e-5	1e-5	1e-5	0.999884	1.7e-5	1e-5	1e-5	TRUE	495633	100089639	0.004951891174270296
I	ECA724	6.729726151350079e-5	F	1e-5	1e-5	0.008431	1e-5	1e-5	0.991476	1.3e-5	1e-5	1e-5	1e-5	1e-5	TRUE	1184468	100089639	0.011834072056149588
I	ECA730	0.001837640834648301	H	1e-5	1e-5	1e-5	1e-5	1e-5	1e-5	1e-5	0.9999	1e-5	1e-5	1e-5	TRUE	1300314	100089639	0.012991494554196563
I	ECA732	0.01661198320840226	A	0.9999	1e-5	1e-5	1e-5	1e-5	1e-5	1e-5	1e-5	1e-5	1e-5	1e-5	TRUE	2459989	100089639	0.024577858653281784
I	ECA733	0.016873391839834644	A	0.9999	1e-5	1e-5	1e-5	1e-5	1e-5	1e-5	1e-5	1e-5	1e-5	1e-5	TRUE	2515978	100089639	0.02513724722296181
I	ECA738	0.23538560499606356	E	1e-5	1e-5	0.279258	1e-5	0.720652	1e-5	1e-5	1e-5	1e-5	1e-5	1e-5	TRUE	11415172	100089639	0.11404948718018655
I	ECA740	0.010635693789214204	F	1e-5	1e-5	1e-5	1e-5	1e-5	0.999895	1e-5	1e-5	1.5e-5	1e-5	1e-5	TRUE	245004	100089639	0.002447845775525277
I	ECA741	6.729726151350079e-5	F	1e-5	1e-5	1e-5	1e-5	1e-5	0.999898	1e-5	1.2e-5	1e-5	1e-5	1e-5	TRUE	513117	100089639	0.005126574589803446
I	ECA742	0.010970384616484412	F	1e-5	1.2e-5	1e-5	1e-5	1.3e-5	0.999881	1e-5	1.6e-5	1e-5	1.8e-5	1e-5	TRUE	303556	100089639	0.003032841391305248
I	ECA743	0.2056785189867719	E	1e-5	0.044726	0.025694	0.052205	0.84473	1e-5	1e-5	1e-5	0.032585	1e-5	1e-5	TRUE	16035610	100089639	0.16021248712866273
I	ECA744	0.010303064439322374	H	1e-5	1e-5	1e-5	1e-5	1e-5	1e-5	1e-5	0.9999	1e-5	1e-5	1e-5	TRUE	849596	100089639	0.008488351126933328
I	ECA745	0.006344562377944746	H	1e-5	1e-5	1e-5	1.2e-5	1e-5	1e-5	1e-5	0.999898	1e-5	1e-5	1e-5	TRUE	452478	100089639	0.004520727664928435
I	ECA746	0.006344562377944746	H	1e-5	1e-5	1e-5	1e-5	1e-5	1e-5	1e-5	0.9999	1e-5	1e-5	1e-5	TRUE	1038498	100089639	0.010375679344792122
I	ECA760	0.22174135122128238	E	1e-5	1e-5	1e-5	1e-5	0.9999	1e-5	1e-5	1e-5	1e-5	1e-5	1e-5	TRUE	12683445	100089639	0.12672085868947933
I	ECA768	0.10669768015300685	E	1e-5	1e-5	1e-5	1.1e-5	0.999899	1e-5	1e-5	1e-5	1e-5	1e-5	1e-5	TRUE	6682588	100089639	0.06676603159693682
I	ECA777	0.22174135122128238	E	1e-5	1e-5	1e-5	1e-5	0.999896	1e-5	1e-5	1e-5	1.4e-5	1e-5	1e-5	TRUE	12833522	100089639	0.1282202846190703
I	ECA778	0.23952997251784658	E	1e-5	1e-5	1e-5	1e-5	0.999896	1e-5	1e-5	1e-5	1.4e-5	1e-5	1e-5	TRUE	12568012	100089639	0.12556756249265721
I	ECA807	0.10431161983643973	E	1e-5	1e-5	1e-5	1e-5	0.9999	1e-5	1e-5	1e-5	1e-5	1e-5	1e-5	TRUE	7087034	100089639	0.07080686943031136
I	ECA812	0.10431161983643973	E	1e-5	1e-5	1e-5	1e-5	0.999899	1e-5	1e-5	1.1e-5	1e-5	1e-5	1e-5	TRUE	7581509	100089639	0.0757471909754815
I	ED3011	0.6152310992615323	C	1e-5	1e-5	0.335005	0.242701	1e-5	1e-5	1e-5	1e-5	1e-5	0.135938	0.286286	FALSE	56474072	100089639	0.5642349454372595
I	JU1172	0.6090668164052901	C	1e-5	1e-5	0.765549	0.234361	1e-5	1e-5	1e-5	1e-5	1e-5	1e-5	1e-5	FALSE	61572965	100089639	0.615178210403976
I	JU2016	0.6326457951613668	C	1e-5	1e-5	0.686517	0.313393	1e-5	1e-5	1e-5	1e-5	1e-5	1e-5	1e-5	FALSE	62607866	100089639	0.6255179519630398
I	JU2017	0.4806651709207469	C	0.130618	0.068426	0.40346	0.272208	1e-5	1e-5	1e-5	1e-5	1e-5	0.085963	0.039275	FALSE	45922442	100089639	0.4588131444854147
I	JU2862	0.6229656293866659	C	1e-5	0.003358	0.426445	0.334683	1e-5	1e-5	0.030298	1e-5	0.135274	0.069892	1e-5	FALSE	54144389	100089639	0.5409589797801149
I	JU2866	0.7065559436083528	C	1e-5	1e-5	0.9999	1e-5	1e-5	1e-5	1e-5	1e-5	1e-5	1e-5	1e-5	FALSE	50771086	100089639	0.5072561606501548
I	MY23	0.3375961803883145	E	1e-5	1e-5	1e-5	1e-5	0.510437	1e-5	1e-5	1e-5	1e-5	1e-5	0.489473	FALSE	10794302	100089639	0.10784634761246366
I	PB306	0.42718599227451376	C	1e-5	1e-5	0.9999	1e-5	1e-5	1e-5	1e-5	1e-5	1e-5	1e-5	1e-5	FALSE	33704149	100089639	0.3367396399541415
I	PS2025	0.35987696039017514	C	1e-5	1e-5	0.9999	1e-5	1e-5	1e-5	1e-5	1e-5	1e-5	1e-5	1e-5	FALSE	30506886	100089639	0.30479564423246647
I	QG556	0.2150154155283377	C	1e-5	1e-5	0.860267	1e-5	0.139643	1e-5	1e-5	1e-5	1e-5	1e-5	1e-5	FALSE	29772807	100089639	0.297461428550062
I	QG557	0.5243740107817927	C	1e-5	1e-5	0.9999	1e-5	1e-5	1e-5	1e-5	1e-5	1e-5	1e-5	1e-5	FALSE	46090020	100089639	0.46048742367828904
I	QX1211	6.360655201350148e-4	F	1e-5	1e-5	1e-5	1e-5	1e-5	0.9999	1e-5	1e-5	1e-5	1e-5	1e-5	FALSE	439015	100089639	0.004386218237833788
I	QX1212	0.48209530422717906	C	0.043174	1e-5	0.806142	1e-5	1e-5	1e-5	1e-5	1e-5	1e-5	1e-5	0.150604	FALSE	46430681	100089639	0.463890982761962
I	QX1233	0.4876388828947186	C	1e-5	1e-5	0.855445	0.144465	1e-5	1e-5	1e-5	1e-5	1e-5	1e-5	1e-5	FALSE	48020451	100089639	0.4797744449852597
I	QX1791	0.2835780916558112	A	0.559108	0.107565	0.137053	1e-5	0.061847	1e-5	1e-5	1e-5	1e-5	1e-5	0.134366	TRUE	19071168	100089639	0.19054088105962697
I	QX1792	0.2643476996805176	E	1e-5	1e-5	1e-5	0.220457	0.617955	1e-5	1e-5	1e-5	1e-5	0.161508	1e-5	TRUE	26507474	100089639	0.2648373424545971
I	QX1793	0.23927820628060337	E	1e-5	1e-5	1e-5	1e-5	0.875683	1e-5	1e-5	1.2e-5	1e-5	0.124224	1e-5	TRUE	14026859	100089639	0.14014296724559072
I	QX1794	0.20943439777163605	E	1e-5	1e-5	0.10701	0.037616	0.855294	1e-5	1e-5	1e-5	1e-5	1e-5	1e-5	TRUE	11802225	100089639	0.11791655078304358
I	XZ1513	0.278170902991596	E	1e-5	1e-5	0.156637	1e-5	0.843273	1e-5	1e-5	1e-5	1e-5	1e-5	1e-5	TRUE	15048046	100089639	0.15034569162548383
I	XZ1514	6.729726151350079e-5	F	1e-5	1.2e-5	1e-5	1e-5	1e-5	0.999894	1e-5	1e-5	1.3e-5	1e-5	1e-5	TRUE	1071398	100089639	0.010704384696601814
I	XZ1515	0.1950725503713685	E	1e-5	1e-5	0.334387	1e-5	0.569182	0.096351	1e-5	1e-5	1e-5	1e-5	1e-5	TRUE	17483115	100089639	0.174674573459097
I	XZ1516	6.729726151350079e-5	F	0.174719	1e-5	1e-5	1e-5	1e-5	0.624136	1e-5	0.201065	1e-5	1e-5	1e-5	TRUE	15079	100089639	1.5065495440542054e-4
II	CB4853	0.0695189834665958	C	1e-5	1e-5	0.692965	0.306945	1e-5	1e-5	1e-5	1e-5	1e-5	1e-5	1e-5	FALSE	61711850	100089639	0.6165658165676869
II	CB4855	0.031522210254880334	C	1e-5	1e-5	0.815787	0.184123	1e-5	1e-5	1e-5	1e-5	1e-5	1e-5	1e-5	FALSE	51460060	100089639	0.5141397302871679
II	CB4856	0.010618062892138033	A	0.9999	1e-5	1e-5	1e-5	1e-5	1e-5	1e-5	1e-5	1e-5	1e-5	1e-5	TRUE	3347671	100089639	0.03344672868687237
II	CB4857	0.10128102878420805	C	1e-5	1e-5	0.999899	1e-5	1e-5	1.1e-5	1e-5	1e-5	1e-5	1e-5	1e-5	FALSE	55517237	100089639	0.5546751647290885
II	CB4858	0.03058470896372562	C	1e-5	1e-5	0.9999	1e-5	1e-5	1e-5	1e-5	1e-5	1e-5	1e-5	1e-5	FALSE	60689498	100089639	0.6063514526213847
II	CX11254	0.10029112710609059	C	1e-5	1e-5	0.656296	1e-5	1e-5	1e-5	1e-5	1e-5	1e-5	0.237537	0.106087	FALSE	46254220	100089639	0.4621279531240991
II	CX11262	0.0633473459007256	C	1e-5	1e-5	0.9999	1e-5	1e-5	1e-5	1e-5	1e-5	1e-5	1e-5	1e-5	FALSE	38381772	100089639	0.3834739777610747
II	CX11264	0.01853196413767359	C	1e-5	1e-5	0.9999	1e-5	1e-5	1e-5	1e-5	1e-5	1e-5	1e-5	1e-5	FALSE	34258305	100089639	0.3422762370039121
II	CX11276	0.06463748408887499	C	1e-5	0.015529	0.591298	0.185454	1e-5	1e-5	1e-5	1e-5	0.009696	0.197963	1e-5	FALSE	58350744	100089639	0.5829848582029554
II	CX11285	0.07630807991013104	C	1.1e-5	1e-5	0.662305	1e-5	1e-5	1e-5	1e-5	1e-5	1e-5	0.337604	1e-5	FALSE	44207713	100089639	0.441681211378932
II	CX11292	0.2237017115514128	C	1e-5	1e-5	0.727048	0.272862	1e-5	1e-5	1e-5	1e-5	1e-5	1e-5	1e-5	FALSE	63494663	100089639	0.6343779799225772
II	CX11307	0.10723447349973396	C	1e-5	1e-5	0.59957	0.183651	1e-5	1e-5	0.038083	1e-5	0.070271	0.057709	0.050666	FALSE	40583755	100089639	0.4054740870830796
II	CX11314	0.02309486391606389	C	1e-5	1e-5	0.9999	1e-5	1e-5	1e-5	1e-5	1e-5	1e-5	1e-5	1e-5	FALSE	48269418	100089639	0.48226188526866404
II	CX11315	0.01853196413767359	C	1e-5	1e-5	0.855784	0.144126	1e-5	1e-5	1e-5	1e-5	1e-5	1e-5	1e-5	FALSE	55969862	100089639	0.5591973610775037
II	DL226	0.1325300225033101	C	1e-5	0.054011	0.722598	0.137152	1e-5	1e-5	1e-5	2e-5	1e-5	0.070261	0.015908	FALSE	52614627	100089639	0.5256750601328475
II	DL238	0.0036530087036452503	A	0.999898	1e-5	1e-5	1e-5	1e-5	1e-5	1e-5	1e-5	1.2e-5	1e-5	1e-5	TRUE	2895303	100089639	0.028927100036798013
II	ECA189	0.01840821003229346	E	1e-5	1e-5	0.157606	1e-5	0.842304	1e-5	1e-5	1e-5	1e-5	1e-5	1e-5	TRUE	17389914	100089639	0.17374339815532755
II	ECA191	0.0010661084987066156	H	1e-5	1e-5	1e-5	1e-5	1e-5	1e-5	1e-5	0.9999	1e-5	1e-5	1e-5	TRUE	459647	100089639	0.0045923534602817385
II	ECA347	0.0034415708468643613	F	1e-5	1e-5	1e-5	1e-5	1e-5	0.9999	1e-5	1e-5	1e-5	1e-5	1e-5	TRUE	115824	100089639	0.0011572026950761607
II	ECA348	0.037528448852139684	C	1e-5	1e-5	0.9999	1e-5	1e-5	1e-5	1e-5	1e-5	1e-5	1e-5	1e-5	FALSE	26624958	100089639	0.26601113028292567
II	ECA349	0.028926981077295556	C	1e-5	1e-5	0.9999	1e-5	1e-5	1e-5	1e-5	1e-5	1e-5	1e-5	1e-5	FALSE	47850347	100089639	0.47807492841491817
II	ECA36	0.005755910340642521	F	1.3e-5	1.9e-5	1e-5	1e-5	1e-5	0.999888	1e-5	1e-5	1e-5	1e-5	1e-5	FALSE	302212	100089639	0.0030194134279972777
II	ECA363	0.028211673166653756	F	1e-5	1e-5	1e-5	1e-5	1e-5	0.9999	1e-5	1e-5	1e-5	1e-5	1e-5	TRUE	707350	100089639	0.007067165063908363
II	ECA369	0.0023695599265974856	A	0.9999	1e-5	1e-5	1e-5	1e-5	1e-5	1e-5	1e-5	1e-5	1e-5	1e-5	TRUE	2317366	100089639	0.02315290596662058
II	ECA372	0.03182966083570813	E	1.8e-5	1e-5	0.232283	1e-5	0.766152	1e-5	1e-5	1e-5	1e-5	0.001477	1e-5	TRUE	14575644	100089639	0.14562590239735004
II	ECA396	0.011522772952402413	H	1e-5	1e-5	1e-5	1e-5	1e-5	1e-5	1e-5	0.9999	1e-5	1e-5	1e-5	TRUE	680265	100089639	0.006796557633702725
II	ECA701	9.181544649294179e-7	F	0.250814	1e-5	1e-5	1e-5	1e-5	0.58748	1e-5	0.161626	1e-5	1e-5	1e-5	TRUE	181973	100089639	0.0018181002730961993
II	ECA703	0.034663019932018535	A	0.9999	1e-5	1e-5	1e-5	1e-5	1e-5	1e-5	1e-5	1e-5	1e-5	1e-5	TRUE	5438720	100089639	0.05433849151958676
II	ECA705	0.009780771602584185	E	1e-5	1e-5	1e-5	1e-5	0.9999	1e-5	1e-5	1e-5	1e-5	1e-5	1e-5	TRUE	13230104	100089639	0.1321825528814226
II	ECA706	0.01375303573017775	A	0.856741	1e-5	1e-5	1e-5	0.143163	1e-5	1e-5	1.6e-5	1e-5	1e-5	1e-5	TRUE	6287738	100089639	0.06282106782301412
II	ECA710	0.029777126529358416	E	1e-5	1e-5	0.071425	1e-5	0.928485	1e-5	1e-5	1e-5	1e-5	1e-5	1e-5	TRUE	13461028	100089639	0.13448972475562632
II	ECA712	0.026466982935902522	E	1e-5	1e-5	1e-5	1e-5	0.9999	1e-5	1e-5	1e-5	1e-5	1e-5	1e-5	TRUE	11054263	100089639	0.11044362943501075
II	ECA722	0.019268389601008764	H	1e-5	1e-5	1e-5	1e-5	1e-5	1e-5	1e-5	0.9999	1e-5	1e-5	1e-5	TRUE	871800	100089639	0.008710192270750422
II	ECA723	0.00922653421807572	H	1.3e-5	1.6e-5	1e-5	1e-5	1e-5	1e-5	1e-5	0.999884	1.7e-5	1e-5	1e-5	TRUE	495633	100089639	0.004951891174270296
II	ECA724	0.036239884643073025	F	1e-5	1e-5	0.008431	1e-5	1e-5	0.991476	1.3e-5	1e-5	1e-5	1e-5	1e-5	TRUE	1184468	100089639	0.011834072056149588
II	ECA730	0.01616509309200911	H	1e-5	1e-5	1e-5	1e-5	1e-5	1e-5	1e-5	0.9999	1e-5	1e-5	1e-5	TRUE	1300314	100089639	0.012991494554196563
II	ECA732	0.028324147088607612	A	0.9999	1e-5	1e-5	1e-5	1e-5	1e-5	1e-5	1e-5	1e-5	1e-5	1e-5	TRUE	2459989	100089639	0.024577858653281784
II	ECA733	0.02484335792959841	A	0.9999	1e-5	1e-5	1e-5	1e-5	1e-5	1e-5	1e-5	1e-5	1e-5	1e-5	TRUE	2515978	100089639	0.02513724722296181
II	ECA738	0.013824323866133342	E	1e-5	1e-5	0.279258	1e-5	0.720652	1e-5	1e-5	1e-5	1e-5	1e-5	1e-5	TRUE	11415172	100089639	0.11404948718018655
II	ECA740	0.0011234275703029234	F	1e-5	1e-5	1e-5	1e-5	1e-5	0.999895	1e-5	1e-5	1.5e-5	1e-5	1e-5	TRUE	245004	100089639	0.002447845775525277
II	ECA741	0.016916930433862745	F	1e-5	1e-5	1e-5	1e-5	1e-5	0.999898	1e-5	1.2e-5	1e-5	1e-5	1e-5	TRUE	513117	100089639	0.005126574589803446
II	ECA742	0.0027915174856943336	F	1e-5	1.2e-5	1e-5	1e-5	1.3e-5	0.999881	1e-5	1.6e-5	1e-5	1.8e-5	1e-5	TRUE	303556	100089639	0.003032841391305248
II	ECA743	0.02081305332332895	E	1e-5	0.044726	0.025694	0.052205	0.84473	1e-5	1e-5	1e-5	0.032585	1e-5	1e-5	TRUE	16035610	100089639	0.16021248712866273
II	ECA744	0.004258203660957298	H	1e-5	1e-5	1e-5	1e-5	1e-5	1e-5	1e-5	0.9999	1e-5	1e-5	1e-5	TRUE	849596	100089639	0.008488351126933328
II	ECA745	0.0015295797561106295	H	1e-5	1e-5	1e-5	1.2e-5	1e-5	1e-5	1e-5	0.999898	1e-5	1e-5	1e-5	TRUE	452478	100089639	0.004520727664928435
II	ECA746	0.004516401812987806	H	1e-5	1e-5	1e-5	1e-5	1e-5	1e-5	1e-5	0.9999	1e-5	1e-5	1e-5	TRUE	1038498	100089639	0.010375679344792122
II	ECA760	0.02999000720029848	E	1e-5	1e-5	1e-5	1e-5	0.9999	1e-5	1e-5	1e-5	1e-5	1e-5	1e-5	TRUE	12683445	100089639	0.12672085868947933
II	ECA768	0.03233287506495123	E	1e-5	1e-5	1e-5	1.1e-5	0.999899	1e-5	1e-5	1e-5	1e-5	1e-5	1e-5	TRUE	6682588	100089639	0.06676603159693682
II	ECA777	0.03983242631695649	E	1e-5	1e-5	1e-5	1e-5	0.999896	1e-5	1e-5	1e-5	1.4e-5	1e-5	1e-5	TRUE	12833522	100089639	0.1282202846190703
II	ECA778	0.02999000720029848	E	1e-5	1e-5	1e-5	1e-5	0.999896	1e-5	1e-5	1e-5	1.4e-5	1e-5	1e-5	TRUE	12568012	100089639	0.12556756249265721
II	ECA807	0.02923272651411705	E	1e-5	1e-5	1e-5	1e-5	0.9999	1e-5	1e-5	1e-5	1e-5	1e-5	1e-5	TRUE	7087034	100089639	0.07080686943031136
II	ECA812	0.02923272651411705	E	1e-5	1e-5	1e-5	1e-5	0.999899	1e-5	1e-5	1.1e-5	1e-5	1e-5	1e-5	TRUE	7581509	100089639	0.0757471909754815
II	ED3011	0.026329915590780916	C	1e-5	1e-5	0.335005	0.242701	1e-5	1e-5	1e-5	1e-5	1e-5	0.135938	0.286286	FALSE	56474072	100089639	0.5642349454372595
II	JU1172	0.05658369545236126	C	1e-5	1e-5	0.765549	0.234361	1e-5	1e-5	1e-5	1e-5	1e-5	1e-5	1e-5	FALSE	61572965	100089639	0.615178210403976
II	JU2016	0.13314210361910914	C	1e-5	1e-5	0.686517	0.313393	1e-5	1e-5	1e-5	1e-5	1e-5	1e-5	1e-5	FALSE	62607866	100089639	0.6255179519630398
II	JU2017	0.09407522137851843	C	0.130618	0.068426	0.40346	0.272208	1e-5	1e-5	1e-5	1e-5	1e-5	0.085963	0.039275	FALSE	45922442	100089639	0.4588131444854147
II	JU2862	0.2916182531468597	C	1e-5	0.003358	0.426445	0.334683	1e-5	1e-5	0.030298	1e-5	0.135274	0.069892	1e-5	FALSE	54144389	100089639	0.5409589797801149
II	JU2866	0.01816922754156469	C	1e-5	1e-5	0.9999	1e-5	1e-5	1e-5	1e-5	1e-5	1e-5	1e-5	1e-5	FALSE	50771086	100089639	0.5072561606501548
II	MY23	0.016260056496667525	E	1e-5	1e-5	1e-5	1e-5	0.510437	1e-5	1e-5	1e-5	1e-5	1e-5	0.489473	FALSE	10794302	100089639	0.10784634761246366
II	PB306	0.024917990771104813	C	1e-5	1e-5	0.9999	1e-5	1e-5	1e-5	1e-5	1e-5	1e-5	1e-5	1e-5	FALSE	33704149	100089639	0.3367396399541415
II	PS2025	0.01576038372036058	C	1e-5	1e-5	0.9999	1e-5	1e-5	1e-5	1e-5	1e-5	1e-5	1e-5	1e-5	FALSE	30506886	100089639	0.30479564423246647
II	QG556	0.0268511649970137	C	1e-5	1e-5	0.860267	1e-5	0.139643	1e-5	1e-5	1e-5	1e-5	1e-5	1e-5	FALSE	29772807	100089639	0.297461428550062
II	QG557	0.018852334463472176	C	1e-5	1e-5	0.9999	1e-5	1e-5	1e-5	1e-5	1e-5	1e-5	1e-5	1e-5	FALSE	46090020	100089639	0.46048742367828904
II	QX1211	0.002508070085878266	F	1e-5	1e-5	1e-5	1e-5	1e-5	0.9999	1e-5	1e-5	1e-5	1e-5	1e-5	FALSE	439015	100089639	0.004386218237833788
II	QX1212	0.027077949149851267	C	0.043174	1e-5	0.806142	1e-5	1e-5	1e-5	1e-5	1e-5	1e-5	1e-5	0.150604	FALSE	46430681	100089639	0.463890982761962
II	QX1233	0.024097095096996132	C	1e-5	1e-5	0.855445	0.144465	1e-5	1e-5	1e-5	1e-5	1e-5	1e-5	1e-5	FALSE	48020451	100089639	0.4797744449852597
II	QX1791	0.04377885095460848	A	0.559108	0.107565	0.137053	1e-5	0.061847	1e-5	1e-5	1e-5	1e-5	1e-5	0.134366	TRUE	19071168	100089639	0.19054088105962697
II	QX1792	0.039914929053876586	E	1e-5	1e-5	1e-5	0.220457	0.617955	1e-5	1e-5	1e-5	1e-5	0.161508	1e-5	TRUE	26507474	100089639	0.2648373424545971
II	QX1793	0.04544628504538208	E	1e-5	1e-5	1e-5	1e-5	0.875683	1e-5	1e-5	1.2e-5	1e-5	0.124224	1e-5	TRUE	14026859	100089639	0.14014296724559072
II	QX1794	0.01823736771935481	E	1e-5	1e-5	0.10701	0.037616	0.855294	1e-5	1e-5	1e-5	1e-5	1e-5	1e-5	TRUE	11802225	100089639	0.11791655078304358
II	XZ1513	0.025552960166065286	E	1e-5	1e-5	0.156637	1e-5	0.843273	1e-5	1e-5	1e-5	1e-5	1e-5	1e-5	TRUE	15048046	100089639	0.15034569162548383
II	XZ1514	0.003444522057644492	F	1e-5	1.2e-5	1e-5	1e-5	1e-5	0.999894	1e-5	1e-5	1.3e-5	1e-5	1e-5	TRUE	1071398	100089639	0.010704384696601814
II	XZ1515	0.03154962372390466	E	1e-5	1e-5	0.334387	1e-5	0.569182	0.096351	1e-5	1e-5	1e-5	1e-5	1e-5	TRUE	17483115	100089639	0.174674573459097
II	XZ1516	9.22548489868723e-4	F	0.174719	1e-5	1e-5	1e-5	1e-5	0.624136	1e-5	0.201065	1e-5	1e-5	1e-5	TRUE	15079	100089639	1.5065495440542054e-4
III	CB4853	0.1361980572094311	C	1e-5	1e-5	0.692965	0.306945	1e-5	1e-5	1e-5	1e-5	1e-5	1e-5	1e-5	FALSE	61711850	100089639	0.6165658165676869
III	CB4855	0.11177917977728533	C	1e-5	1e-5	0.815787	0.184123	1e-5	1e-5	1e-5	1e-5	1e-5	1e-5	1e-5	FALSE	51460060	100089639	0.5141397302871679
III	CB4856	0.025757088083826252	A	0.9999	1e-5	1e-5	1e-5	1e-5	1e-5	1e-5	1e-5	1e-5	1e-5	1e-5	TRUE	3347671	100089639	0.03344672868687237
III	CB4857	0.13879555523253725	C	1e-5	1e-5	0.999899	1e-5	1e-5	1.1e-5	1e-5	1e-5	1e-5	1e-5	1e-5	FALSE	55517237	100089639	0.5546751647290885
III	CB4858	0.13879555523253725	C	1e-5	1e-5	0.9999	1e-5	1e-5	1e-5	1e-5	1e-5	1e-5	1e-5	1e-5	FALSE	60689498	100089639	0.6063514526213847
III	CX11254	0.07408180532320463	C	1e-5	1e-5	0.656296	1e-5	1e-5	1e-5	1e-5	1e-5	1e-5	0.237537	0.106087	FALSE	46254220	100089639	0.4621279531240991
III	CX11262	0.06157918150532035	C	1e-5	1e-5	0.9999	1e-5	1e-5	1e-5	1e-5	1e-5	1e-5	1e-5	1e-5	FALSE	38381772	100089639	0.3834739777610747
III	CX11264	0.09728278109666184	C	1e-5	1e-5	0.9999	1e-5	1e-5	1e-5	1e-5	1e-5	1e-5	1e-5	1e-5	FALSE	34258305	100089639	0.3422762370039121
III	CX11276	0.12020088189323518	C	1e-5	0.015529	0.591298	0.185454	1e-5	1e-5	1e-5	1e-5	0.009696	0.197963	1e-5	FALSE	58350744	100089639	0.5829848582029554
III	CX11285	0.1625760761973413	C	1.1e-5	1e-5	0.662305	1e-5	1e-5	1e-5	1e-5	1e-5	1e-5	0.337604	1e-5	FALSE	44207713	100089639	0.441681211378932
III	CX11292	0.13879555523253725	C	1e-5	1e-5	0.727048	0.272862	1e-5	1e-5	1e-5	1e-5	1e-5	1e-5	1e-5	FALSE	63494663	100089639	0.6343779799225772
III	CX11307	0.058671653669253664	C	1e-5	1e-5	0.59957	0.183651	1e-5	1e-5	0.038083	1e-5	0.070271	0.057709	0.050666	FALSE	40583755	100089639	0.4054740870830796
III	CX11314	0.08975348563904877	C	1e-5	1e-5	0.9999	1e-5	1e-5	1e-5	1e-5	1e-5	1e-5	1e-5	1e-5	FALSE	48269418	100089639	0.48226188526866404
III	CX11315	0.1140261335528567	C	1e-5	1e-5	0.855784	0.144126	1e-5	1e-5	1e-5	1e-5	1e-5	1e-5	1e-5	FALSE	55969862	100089639	0.5591973610775037
III	DL226	0.06853219906469742	C	1e-5	0.054011	0.722598	0.137152	1e-5	1e-5	1e-5	2e-5	1e-5	0.070261	0.015908	FALSE	52614627	100089639	0.5256750601328475
III	DL238	0.01632027430159976	A	0.999898	1e-5	1e-5	1e-5	1e-5	1e-5	1e-5	1e-5	1.2e-5	1e-5	1e-5	TRUE	2895303	100089639	0.028927100036798013
III	ECA189	0.0943692995264821	E	1e-5	1e-5	0.157606	1e-5	0.842304	1e-5	1e-5	1e-5	1e-5	1e-5	1e-5	TRUE	17389914	100089639	0.17374339815532755
III	ECA191	0.006916496483049392	H	1e-5	1e-5	1e-5	1e-5	1e-5	1e-5	1e-5	0.9999	1e-5	1e-5	1e-5	TRUE	459647	100089639	0.0045923534602817385
III	ECA347	1.6634152259779718e-4	F	1e-5	1e-5	1e-5	1e-5	1e-5	0.9999	1e-5	1e-5	1e-5	1e-5	1e-5	TRUE	115824	100089639	0.0011572026950761607
III	ECA348	0.08412604519799034	C	1e-5	1e-5	0.9999	1e-5	1e-5	1e-5	1e-5	1e-5	1e-5	1e-5	1e-5	FALSE	26624958	100089639	0.26601113028292567
III	ECA349	0.13879555523253725	C	1e-5	1e-5	0.9999	1e-5	1e-5	1e-5	1e-5	1e-5	1e-5	1e-5	1e-5	FALSE	47850347	100089639	0.47807492841491817
III	ECA36	0.004861732148908118	F	1.3e-5	1.9e-5	1e-5	1e-5	1e-5	0.999888	1e-5	1e-5	1e-5	1e-5	1e-5	FALSE	302212	100089639	0.0030194134279972777
III	ECA363	1.5298192410020017e-4	F	1e-5	1e-5	1e-5	1e-5	1e-5	0.9999	1e-5	1e-5	1e-5	1e-5	1e-5	TRUE	707350	100089639	0.007067165063908363
III	ECA369	0.04730430529761083	A	0.9999	1e-5	1e-5	1e-5	1e-5	1e-5	1e-5	1e-5	1e-5	1e-5	1e-5	TRUE	2317366	100089639	0.02315290596662058
III	ECA372	0.14583076336527995	E	1.8e-5	1e-5	0.232283	1e-5	0.766152	1e-5	1e-5	1e-5	1e-5	0.001477	1e-5	TRUE	14575644	100089639	0.14562590239735004
III	ECA396	0.011818017001396005	H	1e-5	1e-5	1e-5	1e-5	1e-5	1e-5	1e-5	0.9999	1e-5	1e-5	1e-5	TRUE	680265	100089639	0.006796557633702725
III	ECA701	0.002717443983530229	F	0.250814	1e-5	1e-5	1e-5	1e-5	0.58748	1e-5	0.161626	1e-5	1e-5	1e-5	TRUE	181973	100089639	0.0018181002730961993
III	ECA703	0.07530050565354249	A	0.9999	1e-5	1e-5	1e-5	1e-5	1e-5	1e-5	1e-5	1e-5	1e-5	1e-5	TRUE	5438720	100089639	0.05433849151958676
III	ECA705	0.07346835289001878	E	1e-5	1e-5	1e-5	1e-5	0.9999	1e-5	1e-5	1e-5	1e-5	1e-5	1e-5	TRUE	13230104	100089639	0.1321825528814226
III	ECA706	0.09861866833990797	A	0.856741	1e-5	1e-5	1e-5	0.143163	1e-5	1e-5	1.6e-5	1e-5	1e-5	1e-5	TRUE	6287738	100089639	0.06282106782301412
III	ECA710	0.07682364509529568	E	1e-5	1e-5	0.071425	1e-5	0.928485	1e-5	1e-5	1e-5	1e-5	1e-5	1e-5	TRUE	13461028	100089639	0.13448972475562632
III	ECA712	0.07206603068685254	E	1e-5	1e-5	1e-5	1e-5	0.9999	1e-5	1e-5	1e-5	1e-5	1e-5	1e-5	TRUE	11054263	100089639	0.11044362943501075
III	ECA722	0.01086578257587435	H	1e-5	1e-5	1e-5	1e-5	1e-5	1e-5	1e-5	0.9999	1e-5	1e-5	1e-5	TRUE	871800	100089639	0.008710192270750422
III	ECA723	0.0042270060072451135	H	1.3e-5	1.6e-5	1e-5	1e-5	1e-5	1e-5	1e-5	0.999884	1.7e-5	1e-5	1e-5	TRUE	495633	100089639	0.004951891174270296
III	ECA724	0.024974535080526796	F	1e-5	1e-5	0.008431	1e-5	1e-5	0.991476	1.3e-5	1e-5	1e-5	1e-5	1e-5	TRUE	1184468	100089639	0.011834072056149588
III	ECA730	0.0042270060072451135	H	1e-5	1e-5	1e-5	1e-5	1e-5	1e-5	1e-5	0.9999	1e-5	1e-5	1e-5	TRUE	1300314	100089639	0.012991494554196563
III	ECA732	0.03056574487131185	A	0.9999	1e-5	1e-5	1e-5	1e-5	1e-5	1e-5	1e-5	1e-5	1e-5	1e-5	TRUE	2459989	100089639	0.024577858653281784
III	ECA733	0.03056574487131185	A	0.9999	1e-5	1e-5	1e-5	1e-5	1e-5	1e-5	1e-5	1e-5	1e-5	1e-5	TRUE	2515978	100089639	0.02513724722296181
III	ECA738	0.0924420322301766	E	1e-5	1e-5	0.279258	1e-5	0.720652	1e-5	1e-5	1e-5	1e-5	1e-5	1e-5	TRUE	11415172	100089639	0.11404948718018655
III	ECA740	0.0021177867879234166	F	1e-5	1e-5	1e-5	1e-5	1e-5	0.999895	1e-5	1e-5	1.5e-5	1e-5	1e-5	TRUE	245004	100089639	0.002447845775525277
III	ECA741	1.5298192410020017e-4	F	1e-5	1e-5	1e-5	1e-5	1e-5	0.999898	1e-5	1.2e-5	1e-5	1e-5	1e-5	TRUE	513117	100089639	0.005126574589803446
III	ECA742	0.004861732148908118	F	1e-5	1.2e-5	1e-5	1e-5	1.3e-5	0.999881	1e-5	1.6e-5	1e-5	1.8e-5	1e-5	TRUE	303556	100089639	0.003032841391305248
III	ECA743	0.1037168072970127	E	1e-5	0.044726	0.025694	0.052205	0.84473	1e-5	1e-5	1e-5	0.032585	1e-5	1e-5	TRUE	16035610	100089639	0.16021248712866273
III	ECA744	0.020194993504984327	H	1e-5	1e-5	1e-5	1e-5	1e-5	1e-5	1e-5	0.9999	1e-5	1e-5	1e-5	TRUE	849596	100089639	0.008488351126933328
III	ECA745	0.006271750642513191	H	1e-5	1e-5	1e-5	1.2e-5	1e-5	1e-5	1e-5	0.999898	1e-5	1e-5	1e-5	TRUE	452478	100089639	0.004520727664928435
III	ECA746	0.009731523620822939	H	1e-5	1e-5	1e-5	1e-5	1e-5	1e-5	1e-5	0.9999	1e-5	1e-5	1e-5	TRUE	1038498	100089639	0.010375679344792122
III	ECA760	0.010921544378299104	E	1e-5	1e-5	1e-5	1e-5	0.9999	1e-5	1e-5	1e-5	1e-5	1e-5	1e-5	TRUE	12683445	100089639	0.12672085868947933
III	ECA768	0.021536907088857086	E	1e-5	1e-5	1e-5	1.1e-5	0.999899	1e-5	1e-5	1e-5	1e-5	1e-5	1e-5	TRUE	6682588	100089639	0.06676603159693682
III	ECA777	0.010921544378299104	E	1e-5	1e-5	1e-5	1e-5	0.999896	1e-5	1e-5	1e-5	1.4e-5	1e-5	1e-5	TRUE	12833522	100089639	0.1282202846190703
III	ECA778	0.07034598238028693	E	1e-5	1e-5	1e-5	1e-5	0.999896	1e-5	1e-5	1e-5	1.4e-5	1e-5	1e-5	TRUE	12568012	100089639	0.12556756249265721
III	ECA807	0.059780645557581356	E	1e-5	1e-5	1e-5	1e-5	0.9999	1e-5	1e-5	1e-5	1e-5	1e-5	1e-5	TRUE	7087034	100089639	0.07080686943031136
III	ECA812	0.07206603068685254	E	1e-5	1e-5	1e-5	1e-5	0.999899	1e-5	1e-5	1.1e-5	1e-5	1e-5	1e-5	TRUE	7581509	100089639	0.0757471909754815
III	ED3011	0.21039537949573178	C	1e-5	1e-5	0.335005	0.242701	1e-5	1e-5	1e-5	1e-5	1e-5	0.135938	0.286286	FALSE	56474072	100089639	0.5642349454372595
III	JU1172	0.2495285477557363	C	1e-5	1e-5	0.765549	0.234361	1e-5	1e-5	1e-5	1e-5	1e-5	1e-5	1e-5	FALSE	61572965	100089639	0.615178210403976
III	JU2016	0.13879555523253725	C	1e-5	1e-5	0.686517	0.313393	1e-5	1e-5	1e-5	1e-5	1e-5	1e-5	1e-5	FALSE	62607866	100089639	0.6255179519630398
III	JU2017	0.13017955808626366	C	0.130618	0.068426	0.40346	0.272208	1e-5	1e-5	1e-5	1e-5	1e-5	0.085963	0.039275	FALSE	45922442	100089639	0.4588131444854147
III	JU2862	0.13879555523253725	C	1e-5	0.003358	0.426445	0.334683	1e-5	1e-5	0.030298	1e-5	0.135274	0.069892	1e-5	FALSE	54144389	100089639	0.5409589797801149
III	JU2866	0.13879555523253725	C	1e-5	1e-5	0.9999	1e-5	1e-5	1e-5	1e-5	1e-5	1e-5	1e-5	1e-5	FALSE	50771086	100089639	0.5072561606501548
III	MY23	0.05800599715280818	E	1e-5	1e-5	1e-5	1e-5	0.510437	1e-5	1e-5	1e-5	1e-5	1e-5	0.489473	FALSE	10794302	100089639	0.10784634761246366
III	PB306	0.054628922993459096	C	1e-5	1e-5	0.9999	1e-5	1e-5	1e-5	1e-5	1e-5	1e-5	1e-5	1e-5	FALSE	33704149	100089639	0.3367396399541415
III	PS2025	0.08412604519799034	C	1e-5	1e-5	0.9999	1e-5	1e-5	1e-5	1e-5	1e-5	1e-5	1e-5	1e-5	FALSE	30506886	100089639	0.30479564423246647
III	QG556	0.06589752650664142	C	1e-5	1e-5	0.860267	1e-5	0.139643	1e-5	1e-5	1e-5	1e-5	1e-5	1e-5	FALSE	29772807	100089639	0.297461428550062
III	QG557	0.12749348011659734	C	1e-5	1e-5	0.9999	1e-5	1e-5	1e-5	1e-5	1e-5	1e-5	1e-5	1e-5	FALSE	46090020	100089639	0.46048742367828904
III	QX1211	0.004861732148908118	F	1e-5	1e-5	1e-5	1e-5	1e-5	0.9999	1e-5	1e-5	1e-5	1e-5	1e-5	FALSE	439015	100089639	0.004386218237833788
III	QX1212	0.13879555523253725	C	0.043174	1e-5	0.806142	1e-5	1e-5	1e-5	1e-5	1e-5	1e-5	1e-5	0.150604	FALSE	46430681	100089639	0.463890982761962
III	QX1233	0.06860625770854278	C	1e-5	1e-5	0.855445	0.144465	1e-5	1e-5	1e-5	1e-5	1e-5	1e-5	1e-5	FALSE	48020451	100089639	0.4797744449852597
III	QX1791	0.08286632218748323	A	0.559108	0.107565	0.137053	1e-5	0.061847	1e-5	1e-5	1e-5	1e-5	1e-5	0.134366	TRUE	19071168	100089639	0.19054088105962697
III	QX1792	0.11345726151900523	E	1e-5	1e-5	1e-5	0.220457	0.617955	1e-5	1e-5	1e-5	1e-5	0.161508	1e-5	TRUE	26507474	100089639	0.2648373424545971
III	QX1793	0.14589828742290367	E	1e-5	1e-5	1e-5	1e-5	0.875683	1e-5	1e-5	1.2e-5	1e-5	0.124224	1e-5	TRUE	14026859	100089639	0.14014296724559072
III	QX1794	0.052137212660630115	E	1e-5	1e-5	0.10701	0.037616	0.855294	1e-5	1e-5	1e-5	1e-5	1e-5	1e-5	TRUE	11802225	100089639	0.11791655078304358
III	XZ1513	0.09327083558262261	E	1e-5	1e-5	0.156637	1e-5	0.843273	1e-5	1e-5	1e-5	1e-5	1e-5	1e-5	TRUE	15048046	100089639	0.15034569162548383
III	XZ1514	0.007282651131002553	F	1e-5	1.2e-5	1e-5	1e-5	1e-5	0.999894	1e-5	1e-5	1.3e-5	1e-5	1e-5	TRUE	1071398	100089639	0.010704384696601814
III	XZ1515	0.1376257916923482	E	1e-5	1e-5	0.334387	1e-5	0.569182	0.096351	1e-5	1e-5	1e-5	1e-5	1e-5	TRUE	17483115	100089639	0.174674573459097
III	XZ1516	0	F	0.174719	1e-5	1e-5	1e-5	1e-5	0.624136	1e-5	0.201065	1e-5	1e-5	1e-5	TRUE	15079	100089639	1.5065495440542054e-4
IV	CB4853	0.9914166891995561	C	1e-5	1e-5	0.692965	0.306945	1e-5	1e-5	1e-5	1e-5	1e-5	1e-5	1e-5	FALSE	61711850	100089639	0.6165658165676869
IV	CB4855	0.588737786657915	C	1e-5	1e-5	0.815787	0.184123	1e-5	1e-5	1e-5	1e-5	1e-5	1e-5	1e-5	FALSE	51460060	100089639	0.5141397302871679
IV	CB4856	0.0617539348846511	A	0.9999	1e-5	1e-5	1e-5	1e-5	1e-5	1e-5	1e-5	1e-5	1e-5	1e-5	TRUE	3347671	100089639	0.03344672868687237
IV	CB4857	0.9459918175223546	C	1e-5	1e-5	0.999899	1e-5	1e-5	1.1e-5	1e-5	1e-5	1e-5	1e-5	1e-5	FALSE	55517237	100089639	0.5546751647290885
IV	CB4858	0.9459918175223546	C	1e-5	1e-5	0.9999	1e-5	1e-5	1e-5	1e-5	1e-5	1e-5	1e-5	1e-5	FALSE	60689498	100089639	0.6063514526213847
IV	CX11254	0.8721430532305972	C	1e-5	1e-5	0.656296	1e-5	1e-5	1e-5	1e-5	1e-5	1e-5	0.237537	0.106087	FALSE	46254220	100089639	0.4621279531240991
IV	CX11262	0.9321477364021179	C	1e-5	1e-5	0.9999	1e-5	1e-5	1e-5	1e-5	1e-5	1e-5	1e-5	1e-5	FALSE	38381772	100089639	0.3834739777610747
IV	CX11264	0.8571364355560509	C	1e-5	1e-5	0.9999	1e-5	1e-5	1e-5	1e-5	1e-5	1e-5	1e-5	1e-5	FALSE	34258305	100089639	0.3422762370039121
IV	CX11276	0.9459918175223546	C	1e-5	0.015529	0.591298	0.185454	1e-5	1e-5	1e-5	1e-5	0.009696	0.197963	1e-5	FALSE	58350744	100089639	0.5829848582029554
IV	CX11285	0.6411432098714467	C	1.1e-5	1e-5	0.662305	1e-5	1e-5	1e-5	1e-5	1e-5	1e-5	0.337604	1e-5	FALSE	44207713	100089639	0.441681211378932
IV	CX11292	0.9459918175223546	C	1e-5	1e-5	0.727048	0.272862	1e-5	1e-5	1e-5	1e-5	1e-5	1e-5	1e-5	FALSE	63494663	100089639	0.6343779799225772
IV	CX11307	0.9731289273450202	C	1e-5	1e-5	0.59957	0.183651	1e-5	1e-5	0.038083	1e-5	0.070271	0.057709	0.050666	FALSE	40583755	100089639	0.4054740870830796
IV	CX11314	0.9459918175223546	C	1e-5	1e-5	0.9999	1e-5	1e-5	1e-5	1e-5	1e-5	1e-5	1e-5	1e-5	FALSE	48269418	100089639	0.48226188526866404
IV	CX11315	0.8571364355560509	C	1e-5	1e-5	0.855784	0.144126	1e-5	1e-5	1e-5	1e-5	1e-5	1e-5	1e-5	FALSE	55969862	100089639	0.5591973610775037
IV	DL226	0.8685529848567516	C	1e-5	0.054011	0.722598	0.137152	1e-5	1e-5	1e-5	2e-5	1e-5	0.070261	0.015908	FALSE	52614627	100089639	0.5256750601328475
IV	DL238	0.024291028148796422	A	0.999898	1e-5	1e-5	1e-5	1e-5	1e-5	1e-5	1e-5	1.2e-5	1e-5	1e-5	TRUE	2895303	100089639	0.028927100036798013
IV	ECA189	0.08470388343168682	E	1e-5	1e-5	0.157606	1e-5	0.842304	1e-5	1e-5	1e-5	1e-5	1e-5	1e-5	TRUE	17389914	100089639	0.17374339815532755
IV	ECA191	1.2516360712456709e-4	H	1e-5	1e-5	1e-5	1e-5	1e-5	1e-5	1e-5	0.9999	1e-5	1e-5	1e-5	TRUE	459647	100089639	0.0045923534602817385
IV	ECA347	3.3254645960718696e-6	F	1e-5	1e-5	1e-5	1e-5	1e-5	0.9999	1e-5	1e-5	1e-5	1e-5	1e-5	TRUE	115824	100089639	0.0011572026950761607
IV	ECA348	0.7251550526535717	C	1e-5	1e-5	0.9999	1e-5	1e-5	1e-5	1e-5	1e-5	1e-5	1e-5	1e-5	FALSE	26624958	100089639	0.26601113028292567
IV	ECA349	0.8398150078446563	C	1e-5	1e-5	0.9999	1e-5	1e-5	1e-5	1e-5	1e-5	1e-5	1e-5	1e-5	FALSE	47850347	100089639	0.47807492841491817
IV	ECA36	3.3254645960718696e-6	F	1.3e-5	1.9e-5	1e-5	1e-5	1e-5	0.999888	1e-5	1e-5	1e-5	1e-5	1e-5	FALSE	302212	100089639	0.0030194134279972777
IV	ECA363	3.3254645960718696e-6	F	1e-5	1e-5	1e-5	1e-5	1e-5	0.9999	1e-5	1e-5	1e-5	1e-5	1e-5	TRUE	707350	100089639	0.007067165063908363
IV	ECA369	0.05221925453174821	A	0.9999	1e-5	1e-5	1e-5	1e-5	1e-5	1e-5	1e-5	1e-5	1e-5	1e-5	TRUE	2317366	100089639	0.02315290596662058
IV	ECA372	0.08187001423986874	E	1.8e-5	1e-5	0.232283	1e-5	0.766152	1e-5	1e-5	1e-5	1e-5	0.001477	1e-5	TRUE	14575644	100089639	0.14562590239735004
IV	ECA396	0	H	1e-5	1e-5	1e-5	1e-5	1e-5	1e-5	1e-5	0.9999	1e-5	1e-5	1e-5	TRUE	680265	100089639	0.006796557633702725
IV	ECA701	0.004726918580930227	F	0.250814	1e-5	1e-5	1e-5	1e-5	0.58748	1e-5	0.161626	1e-5	1e-5	1e-5	TRUE	181973	100089639	0.0018181002730961993
IV	ECA703	0.03223086154990043	A	0.9999	1e-5	1e-5	1e-5	1e-5	1e-5	1e-5	1e-5	1e-5	1e-5	1e-5	TRUE	5438720	100089639	0.05433849151958676
IV	ECA705	0.09029416142447308	E	1e-5	1e-5	1e-5	1e-5	0.9999	1e-5	1e-5	1e-5	1e-5	1e-5	1e-5	TRUE	13230104	100089639	0.1321825528814226
IV	ECA706	0.07876076217813803	A	0.856741	1e-5	1e-5	1e-5	0.143163	1e-5	1e-5	1.6e-5	1e-5	1e-5	1e-5	TRUE	6287738	100089639	0.06282106782301412
IV	ECA710	0.06554674192766403	E	1e-5	1e-5	0.071425	1e-5	0.928485	1e-5	1e-5	1e-5	1e-5	1e-5	1e-5	TRUE	13461028	100089639	0.13448972475562632
IV	ECA712	0.07092654094575754	E	1e-5	1e-5	1e-5	1e-5	0.9999	1e-5	1e-5	1e-5	1e-5	1e-5	1e-5	TRUE	11054263	100089639	0.11044362943501075
IV	ECA722	0.002343019150318568	H	1e-5	1e-5	1e-5	1e-5	1e-5	1e-5	1e-5	0.9999	1e-5	1e-5	1e-5	TRUE	871800	100089639	0.008710192270750422
IV	ECA723	1.2516360712456709e-4	H	1.3e-5	1.6e-5	1e-5	1e-5	1e-5	1e-5	1e-5	0.999884	1.7e-5	1e-5	1e-5	TRUE	495633	100089639	0.004951891174270296
IV	ECA724	4.4693097459276245e-4	F	1e-5	1e-5	0.008431	1e-5	1e-5	0.991476	1.3e-5	1e-5	1e-5	1e-5	1e-5	TRUE	1184468	100089639	0.011834072056149588
IV	ECA730	1.2516360712456709e-4	H	1e-5	1e-5	1e-5	1e-5	1e-5	1e-5	1e-5	0.9999	1e-5	1e-5	1e-5	TRUE	1300314	100089639	0.012991494554196563
IV	ECA732	0.0036547429266794687	A	0.9999	1e-5	1e-5	1e-5	1e-5	1e-5	1e-5	1e-5	1e-5	1e-5	1e-5	TRUE	2459989	100089639	0.024577858653281784
IV	ECA733	0.00526937065926533	A	0.9999	1e-5	1e-5	1e-5	1e-5	1e-5	1e-5	1e-5	1e-5	1e-5	1e-5	TRUE	2515978	100089639	0.02513724722296181
IV	ECA738	0.06396227271882876	E	1e-5	1e-5	0.279258	1e-5	0.720652	1e-5	1e-5	1e-5	1e-5	1e-5	1e-5	TRUE	11415172	100089639	0.11404948718018655
IV	ECA740	0	F	1e-5	1e-5	1e-5	1e-5	1e-5	0.999895	1e-5	1e-5	1.5e-5	1e-5	1e-5	TRUE	245004	100089639	0.002447845775525277
IV	ECA741	0	F	1e-5	1e-5	1e-5	1e-5	1e-5	0.999898	1e-5	1.2e-5	1e-5	1e-5	1e-5	TRUE	513117	100089639	0.005126574589803446
IV	ECA742	0	F	1e-5	1.2e-5	1e-5	1e-5	1.3e-5	0.999881	1e-5	1.6e-5	1e-5	1.8e-5	1e-5	TRUE	303556	100089639	0.003032841391305248
IV	ECA743	0.09198751093103147	E	1e-5	0.044726	0.025694	0.052205	0.84473	1e-5	1e-5	1e-5	0.032585	1e-5	1e-5	TRUE	16035610	100089639	0.16021248712866273
IV	ECA744	0.005478301572853017	H	1e-5	1e-5	1e-5	1e-5	1e-5	1e-5	1e-5	0.9999	1e-5	1e-5	1e-5	TRUE	849596	100089639	0.008488351126933328
IV	ECA745	0	H	1e-5	1e-5	1e-5	1.2e-5	1e-5	1e-5	1e-5	0.999898	1e-5	1e-5	1e-5	TRUE	452478	100089639	0.004520727664928435
IV	ECA746	0	H	1e-5	1e-5	1e-5	1e-5	1e-5	1e-5	1e-5	0.9999	1e-5	1e-5	1e-5	TRUE	1038498	100089639	0.010375679344792122
IV	ECA760	0.061124562042046256	E	1e-5	1e-5	1e-5	1e-5	0.9999	1e-5	1e-5	1e-5	1e-5	1e-5	1e-5	TRUE	12683445	100089639	0.12672085868947933
IV	ECA768	0.07081811933280631	E	1e-5	1e-5	1e-5	1.1e-5	0.999899	1e-5	1e-5	1e-5	1e-5	1e-5	1e-5	TRUE	6682588	100089639	0.06676603159693682
IV	ECA777	0.061124562042046256	E	1e-5	1e-5	1e-5	1e-5	0.999896	1e-5	1e-5	1e-5	1.4e-5	1e-5	1e-5	TRUE	12833522	100089639	0.1282202846190703
IV	ECA778	0.08256429097769347	E	1e-5	1e-5	1e-5	1e-5	0.999896	1e-5	1e-5	1e-5	1.4e-5	1e-5	1e-5	TRUE	12568012	100089639	0.12556756249265721
IV	ECA807	0.08256429097769347	E	1e-5	1e-5	1e-5	1e-5	0.9999	1e-5	1e-5	1e-5	1e-5	1e-5	1e-5	TRUE	7087034	100089639	0.07080686943031136
IV	ECA812	0.08256429097769347	E	1e-5	1e-5	1e-5	1e-5	0.999899	1e-5	1e-5	1.1e-5	1e-5	1e-5	1e-5	TRUE	7581509	100089639	0.0757471909754815
IV	ED3011	0.7264924627771574	C	1e-5	1e-5	0.335005	0.242701	1e-5	1e-5	1e-5	1e-5	1e-5	0.135938	0.286286	FALSE	56474072	100089639	0.5642349454372595
IV	JU1172	0.9459918175223546	C	1e-5	1e-5	0.765549	0.234361	1e-5	1e-5	1e-5	1e-5	1e-5	1e-5	1e-5	FALSE	61572965	100089639	0.615178210403976
IV	JU2016	0.9459918175223546	C	1e-5	1e-5	0.686517	0.313393	1e-5	1e-5	1e-5	1e-5	1e-5	1e-5	1e-5	FALSE	62607866	100089639	0.6255179519630398
IV	JU2017	0.5140427489620537	C	0.130618	0.068426	0.40346	0.272208	1e-5	1e-5	1e-5	1e-5	1e-5	0.085963	0.039275	FALSE	45922442	100089639	0.4588131444854147
IV	JU2862	0.8574348100001536	C	1e-5	0.003358	0.426445	0.334683	1e-5	1e-5	0.030298	1e-5	0.135274	0.069892	1e-5	FALSE	54144389	100089639	0.5409589797801149
IV	JU2866	0.956803590951342	C	1e-5	1e-5	0.9999	1e-5	1e-5	1e-5	1e-5	1e-5	1e-5	1e-5	1e-5	FALSE	50771086	100089639	0.5072561606501548
IV	MY23	0.08100264133625883	E	1e-5	1e-5	1e-5	1e-5	0.510437	1e-5	1e-5	1e-5	1e-5	1e-5	0.489473	FALSE	10794302	100089639	0.10784634761246366
IV	PB306	0.9459918175223546	C	1e-5	1e-5	0.9999	1e-5	1e-5	1e-5	1e-5	1e-5	1e-5	1e-5	1e-5	FALSE	33704149	100089639	0.3367396399541415
IV	PS2025	0.7558078092458466	C	1e-5	1e-5	0.9999	1e-5	1e-5	1e-5	1e-5	1e-5	1e-5	1e-5	1e-5	FALSE	30506886	100089639	0.30479564423246647
IV	QG556	0.7731153044072956	C	1e-5	1e-5	0.860267	1e-5	0.139643	1e-5	1e-5	1e-5	1e-5	1e-5	1e-5	FALSE	29772807	100089639	0.297461428550062
IV	QG557	0.6144396718293931	C	1e-5	1e-5	0.9999	1e-5	1e-5	1e-5	1e-5	1e-5	1e-5	1e-5	1e-5	FALSE	46090020	100089639	0.46048742367828904
IV	QX1211	3.3254645960718696e-6	F	1e-5	1e-5	1e-5	1e-5	1e-5	0.9999	1e-5	1e-5	1e-5	1e-5	1e-5	FALSE	439015	100089639	0.004386218237833788
IV	QX1212	0.9459918175223546	C	0.043174	1e-5	0.806142	1e-5	1e-5	1e-5	1e-5	1e-5	1e-5	1e-5	0.150604	FALSE	46430681	100089639	0.463890982761962
IV	QX1233	0.5543673326540212	C	1e-5	1e-5	0.855445	0.144465	1e-5	1e-5	1e-5	1e-5	1e-5	1e-5	1e-5	FALSE	48020451	100089639	0.4797744449852597
IV	QX1791	0.047435115025526955	A	0.559108	0.107565	0.137053	1e-5	0.061847	1e-5	1e-5	1e-5	1e-5	1e-5	0.134366	TRUE	19071168	100089639	0.19054088105962697
IV	QX1792	0.06291549673382041	E	1e-5	1e-5	1e-5	0.220457	0.617955	1e-5	1e-5	1e-5	1e-5	0.161508	1e-5	TRUE	26507474	100089639	0.2648373424545971
IV	QX1793	0.06720408467963047	E	1e-5	1e-5	1e-5	1e-5	0.875683	1e-5	1e-5	1.2e-5	1e-5	0.124224	1e-5	TRUE	14026859	100089639	0.14014296724559072
IV	QX1794	0.06279692672029151	E	1e-5	1e-5	0.10701	0.037616	0.855294	1e-5	1e-5	1e-5	1e-5	1e-5	1e-5	TRUE	11802225	100089639	0.11791655078304358
IV	XZ1513	0.06535397965228483	E	1e-5	1e-5	0.156637	1e-5	0.843273	1e-5	1e-5	1e-5	1e-5	1e-5	1e-5	TRUE	15048046	100089639	0.15034569162548383
IV	XZ1514	0	F	1e-5	1.2e-5	1e-5	1e-5	1e-5	0.999894	1e-5	1e-5	1.3e-5	1e-5	1e-5	TRUE	1071398	100089639	0.010704384696601814
IV	XZ1515	0.11252632563912562	E	1e-5	1e-5	0.334387	1e-5	0.569182	0.096351	1e-5	1e-5	1e-5	1e-5	1e-5	TRUE	17483115	100089639	0.174674573459097
IV	XZ1516	0	F	0.174719	1e-5	1e-5	1e-5	1e-5	0.624136	1e-5	0.201065	1e-5	1e-5	1e-5	TRUE	15079	100089639	1.5065495440542054e-4
V	CB4853	0.9240268429028465	C	1e-5	1e-5	0.692965	0.306945	1e-5	1e-5	1e-5	1e-5	1e-5	1e-5	1e-5	FALSE	61711850	100089639	0.6165658165676869
V	CB4855	0.8600448108666352	C	1e-5	1e-5	0.815787	0.184123	1e-5	1e-5	1e-5	1e-5	1e-5	1e-5	1e-5	FALSE	51460060	100089639	0.5141397302871679
V	CB4856	0.02999046257788552	A	0.9999	1e-5	1e-5	1e-5	1e-5	1e-5	1e-5	1e-5	1e-5	1e-5	1e-5	TRUE	3347671	100089639	0.03344672868687237
V	CB4857	0.9240268429028465	C	1e-5	1e-5	0.999899	1e-5	1e-5	1.1e-5	1e-5	1e-5	1e-5	1e-5	1e-5	FALSE	55517237	100089639	0.5546751647290885
V	CB4858	0.9240268429028465	C	1e-5	1e-5	0.9999	1e-5	1e-5	1e-5	1e-5	1e-5	1e-5	1e-5	1e-5	FALSE	60689498	100089639	0.6063514526213847
V	CX11254	0.5276150983006822	C	1e-5	1e-5	0.656296	1e-5	1e-5	1e-5	1e-5	1e-5	1e-5	0.237537	0.106087	FALSE	46254220	100089639	0.4621279531240991
V	CX11262	0.3242937778531512	C	1e-5	1e-5	0.9999	1e-5	1e-5	1e-5	1e-5	1e-5	1e-5	1e-5	1e-5	FALSE	38381772	100089639	0.3834739777610747
V	CX11264	0.3163687549421992	C	1e-5	1e-5	0.9999	1e-5	1e-5	1e-5	1e-5	1e-5	1e-5	1e-5	1e-5	FALSE	34258305	100089639	0.3422762370039121
V	CX11276	0.9138630940407421	C	1e-5	0.015529	0.591298	0.185454	1e-5	1e-5	1e-5	1e-5	0.009696	0.197963	1e-5	FALSE	58350744	100089639	0.5829848582029554
V	CX11285	0.5257315746062956	C	1.1e-5	1e-5	0.662305	1e-5	1e-5	1e-5	1e-5	1e-5	1e-5	0.337604	1e-5	FALSE	44207713	100089639	0.441681211378932
V	CX11292	0.9240268429028465	C	1e-5	1e-5	0.727048	0.272862	1e-5	1e-5	1e-5	1e-5	1e-5	1e-5	1e-5	FALSE	63494663	100089639	0.6343779799225772
V	CX11307	0.46764957305425253	C	1e-5	1e-5	0.59957	0.183651	1e-5	1e-5	0.038083	1e-5	0.070271	0.057709	0.050666	FALSE	40583755	100089639	0.4054740870830796
V	CX11314	0.36779240003952324	C	1e-5	1e-5	0.9999	1e-5	1e-5	1e-5	1e-5	1e-5	1e-5	1e-5	1e-5	FALSE	48269418	100089639	0.48226188526866404
V	CX11315	0.8232394101471247	C	1e-5	1e-5	0.855784	0.144126	1e-5	1e-5	1e-5	1e-5	1e-5	1e-5	1e-5	FALSE	55969862	100089639	0.5591973610775037
V	DL226	0.8520281537125212	C	1e-5	0.054011	0.722598	0.137152	1e-5	1e-5	1e-5	2e-5	1e-5	0.070261	0.015908	FALSE	52614627	100089639	0.5256750601328475
V	DL238	0.05510852775240619	A	0.999898	1e-5	1e-5	1e-5	1e-5	1e-5	1e-5	1e-5	1.2e-5	1e-5	1e-5	TRUE	2895303	100089639	0.028927100036798013
V	ECA189	0.29828165707233184	E	1e-5	1e-5	0.157606	1e-5	0.842304	1e-5	1e-5	1e-5	1e-5	1e-5	1e-5	TRUE	17389914	100089639	0.17374339815532755
V	ECA191	0.01184334332223105	H	1e-5	1e-5	1e-5	1e-5	1e-5	1e-5	1e-5	0.9999	1e-5	1e-5	1e-5	TRUE	459647	100089639	0.0045923534602817385
V	ECA347	0.0024478681982019984	F	1e-5	1e-5	1e-5	1e-5	1e-5	0.9999	1e-5	1e-5	1e-5	1e-5	1e-5	TRUE	115824	100089639	0.0011572026950761607
V	ECA348	0.21345383905870396	C	1e-5	1e-5	0.9999	1e-5	1e-5	1e-5	1e-5	1e-5	1e-5	1e-5	1e-5	FALSE	26624958	100089639	0.26601113028292567
V	ECA349	0.8010896535852567	C	1e-5	1e-5	0.9999	1e-5	1e-5	1e-5	1e-5	1e-5	1e-5	1e-5	1e-5	FALSE	47850347	100089639	0.47807492841491817
V	ECA36	0.004570233964796572	F	1.3e-5	1.9e-5	1e-5	1e-5	1e-5	0.999888	1e-5	1e-5	1e-5	1e-5	1e-5	FALSE	302212	100089639	0.0030194134279972777
V	ECA363	0.01310436633342602	F	1e-5	1e-5	1e-5	1e-5	1e-5	0.9999	1e-5	1e-5	1e-5	1e-5	1e-5	TRUE	707350	100089639	0.007067165063908363
V	ECA369	0.011835834670781982	A	0.9999	1e-5	1e-5	1e-5	1e-5	1e-5	1e-5	1e-5	1e-5	1e-5	1e-5	TRUE	2317366	100089639	0.02315290596662058
V	ECA372	0.12502909004613946	E	1.8e-5	1e-5	0.232283	1e-5	0.766152	1e-5	1e-5	1e-5	1e-5	0.001477	1e-5	TRUE	14575644	100089639	0.14562590239735004
V	ECA396	0.0116448662297875	H	1e-5	1e-5	1e-5	1e-5	1e-5	1e-5	1e-5	0.9999	1e-5	1e-5	1e-5	TRUE	680265	100089639	0.006796557633702725
V	ECA701	0	F	0.250814	1e-5	1e-5	1e-5	1e-5	0.58748	1e-5	0.161626	1e-5	1e-5	1e-5	TRUE	181973	100089639	0.0018181002730961993
V	ECA703	0.07548734256581811	A	0.9999	1e-5	1e-5	1e-5	1e-5	1e-5	1e-5	1e-5	1e-5	1e-5	1e-5	TRUE	5438720	100089639	0.05433849151958676
V	ECA705	0.2798284048362602	E	1e-5	1e-5	1e-5	1e-5	0.9999	1e-5	1e-5	1e-5	1e-5	1e-5	1e-5	TRUE	13230104	100089639	0.1321825528814226
V	ECA706	0.09160176944001816	A	0.856741	1e-5	1e-5	1e-5	0.143163	1e-5	1e-5	1.6e-5	1e-5	1e-5	1e-5	TRUE	6287738	100089639	0.06282106782301412
V	ECA710	0.25456184053594744	E	1e-5	1e-5	0.071425	1e-5	0.928485	1e-5	1e-5	1e-5	1e-5	1e-5	1e-5	TRUE	13461028	100089639	0.13448972475562632
V	ECA712	0.12324944400109923	E	1e-5	1e-5	1e-5	1e-5	0.9999	1e-5	1e-5	1e-5	1e-5	1e-5	1e-5	TRUE	11054263	100089639	0.11044362943501075
V	ECA722	0.013806975240676192	H	1e-5	1e-5	1e-5	1e-5	1e-5	1e-5	1e-5	0.9999	1e-5	1e-5	1e-5	TRUE	871800	100089639	0.008710192270750422
V	ECA723	0.01246560487639564	H	1.3e-5	1.6e-5	1e-5	1e-5	1e-5	1e-5	1e-5	0.999884	1.7e-5	1e-5	1e-5	TRUE	495633	100089639	0.004951891174270296
V	ECA724	0.013348421418423476	F	1e-5	1e-5	0.008431	1e-5	1e-5	0.991476	1.3e-5	1e-5	1e-5	1e-5	1e-5	TRUE	1184468	100089639	0.011834072056149588
V	ECA730	0.04605094194358526	H	1e-5	1e-5	1e-5	1e-5	1e-5	1e-5	1e-5	0.9999	1e-5	1e-5	1e-5	TRUE	1300314	100089639	0.012991494554196563
V	ECA732	0.03614071767594899	A	0.9999	1e-5	1e-5	1e-5	1e-5	1e-5	1e-5	1e-5	1e-5	1e-5	1e-5	TRUE	2459989	100089639	0.024577858653281784
V	ECA733	0.03614071767594899	A	0.9999	1e-5	1e-5	1e-5	1e-5	1e-5	1e-5	1e-5	1e-5	1e-5	1e-5	TRUE	2515978	100089639	0.02513724722296181
V	ECA738	0.18286273219069832	E	1e-5	1e-5	0.279258	1e-5	0.720652	1e-5	1e-5	1e-5	1e-5	1e-5	1e-5	TRUE	11415172	100089639	0.11404948718018655
V	ECA740	0.0018541586498660352	F	1e-5	1e-5	1e-5	1e-5	1e-5	0.999895	1e-5	1e-5	1.5e-5	1e-5	1e-5	TRUE	245004	100089639	0.002447845775525277
V	ECA741	0.012054446427302338	F	1e-5	1e-5	1e-5	1e-5	1e-5	0.999898	1e-5	1.2e-5	1e-5	1e-5	1e-5	TRUE	513117	100089639	0.005126574589803446
V	ECA742	0.001389865730964349	F	1e-5	1.2e-5	1e-5	1e-5	1.3e-5	0.999881	1e-5	1.6e-5	1e-5	1.8e-5	1e-5	TRUE	303556	100089639	0.003032841391305248
V	ECA743	0.42061184126768225	E	1e-5	0.044726	0.025694	0.052205	0.84473	1e-5	1e-5	1e-5	0.032585	1e-5	1e-5	TRUE	16035610	100089639	0.16021248712866273
V	ECA744	0.012106433077780926	H	1e-5	1e-5	1e-5	1e-5	1e-5	1e-5	1e-5	0.9999	1e-5	1e-5	1e-5	TRUE	849596	100089639	0.008488351126933328
V	ECA745	0.011691592041671198	H	1e-5	1e-5	1e-5	1.2e-5	1e-5	1e-5	1e-5	0.999898	1e-5	1e-5	1e-5	TRUE	452478	100089639	0.004520727664928435
V	ECA746	0.03526139241771594	H	1e-5	1e-5	1e-5	1e-5	1e-5	1e-5	1e-5	0.9999	1e-5	1e-5	1e-5	TRUE	1038498	100089639	0.010375679344792122
V	ECA760	0.33111077250440885	E	1e-5	1e-5	1e-5	1e-5	0.9999	1e-5	1e-5	1e-5	1e-5	1e-5	1e-5	TRUE	12683445	100089639	0.12672085868947933
V	ECA768	0.10857572168901232	E	1e-5	1e-5	1e-5	1.1e-5	0.999899	1e-5	1e-5	1e-5	1e-5	1e-5	1e-5	TRUE	6682588	100089639	0.06676603159693682
V	ECA777	0.33111077250440885	E	1e-5	1e-5	1e-5	1e-5	0.999896	1e-5	1e-5	1e-5	1.4e-5	1e-5	1e-5	TRUE	12833522	100089639	0.1282202846190703
V	ECA778	0.2557701595095827	E	1e-5	1e-5	1e-5	1e-5	0.999896	1e-5	1e-5	1e-5	1.4e-5	1e-5	1e-5	TRUE	12568012	100089639	0.12556756249265721
V	ECA807	0.12324944400109923	E	1e-5	1e-5	1e-5	1e-5	0.9999	1e-5	1e-5	1e-5	1e-5	1e-5	1e-5	TRUE	7087034	100089639	0.07080686943031136
V	ECA812	0.12324944400109923	E	1e-5	1e-5	1e-5	1e-5	0.999899	1e-5	1e-5	1.1e-5	1e-5	1e-5	1e-5	TRUE	7581509	100089639	0.0757471909754815
V	ED3011	0.9240268429028465	C	1e-5	1e-5	0.335005	0.242701	1e-5	1e-5	1e-5	1e-5	1e-5	0.135938	0.286286	FALSE	56474072	100089639	0.5642349454372595
V	JU1172	0.8743800221280437	C	1e-5	1e-5	0.765549	0.234361	1e-5	1e-5	1e-5	1e-5	1e-5	1e-5	1e-5	FALSE	61572965	100089639	0.615178210403976
V	JU2016	0.9240268429028465	C	1e-5	1e-5	0.686517	0.313393	1e-5	1e-5	1e-5	1e-5	1e-5	1e-5	1e-5	FALSE	62607866	100089639	0.6255179519630398
V	JU2017	0.7704796076983095	C	0.130618	0.068426	0.40346	0.272208	1e-5	1e-5	1e-5	1e-5	1e-5	0.085963	0.039275	FALSE	45922442	100089639	0.4588131444854147
V	JU2862	0.9321623471833996	C	1e-5	0.003358	0.426445	0.334683	1e-5	1e-5	0.030298	1e-5	0.135274	0.069892	1e-5	FALSE	54144389	100089639	0.5409589797801149
V	JU2866	0.8080885776002866	C	1e-5	1e-5	0.9999	1e-5	1e-5	1e-5	1e-5	1e-5	1e-5	1e-5	1e-5	FALSE	50771086	100089639	0.5072561606501548
V	MY23	0.1283124272390153	E	1e-5	1e-5	1e-5	1e-5	0.510437	1e-5	1e-5	1e-5	1e-5	1e-5	0.489473	FALSE	10794302	100089639	0.10784634761246366
V	PB306	0.3150095455525014	C	1e-5	1e-5	0.9999	1e-5	1e-5	1e-5	1e-5	1e-5	1e-5	1e-5	1e-5	FALSE	33704149	100089639	0.3367396399541415
V	PS2025	0.19170266275910705	C	1e-5	1e-5	0.9999	1e-5	1e-5	1e-5	1e-5	1e-5	1e-5	1e-5	1e-5	FALSE	30506886	100089639	0.30479564423246647
V	QG556	0.4140849101262247	C	1e-5	1e-5	0.860267	1e-5	0.139643	1e-5	1e-5	1e-5	1e-5	1e-5	1e-5	FALSE	29772807	100089639	0.297461428550062
V	QG557	0.9240268429028465	C	1e-5	1e-5	0.9999	1e-5	1e-5	1e-5	1e-5	1e-5	1e-5	1e-5	1e-5	FALSE	46090020	100089639	0.46048742367828904
V	QX1211	0.015504600029441566	F	1e-5	1e-5	1e-5	1e-5	1e-5	0.9999	1e-5	1e-5	1e-5	1e-5	1e-5	FALSE	439015	100089639	0.004386218237833788
V	QX1212	0.33596174394695083	C	0.043174	1e-5	0.806142	1e-5	1e-5	1e-5	1e-5	1e-5	1e-5	1e-5	0.150604	FALSE	46430681	100089639	0.463890982761962
V	QX1233	0.8600448108666352	C	1e-5	1e-5	0.855445	0.144465	1e-5	1e-5	1e-5	1e-5	1e-5	1e-5	1e-5	FALSE	48020451	100089639	0.4797744449852597
V	QX1791	0.4291185216240075	A	0.559108	0.107565	0.137053	1e-5	0.061847	1e-5	1e-5	1e-5	1e-5	1e-5	0.134366	TRUE	19071168	100089639	0.19054088105962697
V	QX1792	0.5312900810140448	E	1e-5	1e-5	1e-5	0.220457	0.617955	1e-5	1e-5	1e-5	1e-5	0.161508	1e-5	TRUE	26507474	100089639	0.2648373424545971
V	QX1793	0.2688031697413399	E	1e-5	1e-5	1e-5	1e-5	0.875683	1e-5	1e-5	1.2e-5	1e-5	0.124224	1e-5	TRUE	14026859	100089639	0.14014296724559072
V	QX1794	0.2897092640593759	E	1e-5	1e-5	0.10701	0.037616	0.855294	1e-5	1e-5	1e-5	1e-5	1e-5	1e-5	TRUE	11802225	100089639	0.11791655078304358
V	XZ1513	0.3165025237199256	E	1e-5	1e-5	0.156637	1e-5	0.843273	1e-5	1e-5	1e-5	1e-5	1e-5	1e-5	TRUE	15048046	100089639	0.15034569162548383
V	XZ1514	0.04388309383604759	F	1e-5	1.2e-5	1e-5	1e-5	1e-5	0.999894	1e-5	1e-5	1.3e-5	1e-5	1e-5	TRUE	1071398	100089639	0.010704384696601814
V	XZ1515	0.44486043329988395	E	1e-5	1e-5	0.334387	1e-5	0.569182	0.096351	1e-5	1e-5	1e-5	1e-5	1e-5	TRUE	17483115	100089639	0.174674573459097
V	XZ1516	0	F	0.174719	1e-5	1e-5	1e-5	1e-5	0.624136	1e-5	0.201065	1e-5	1e-5	1e-5	TRUE	15079	100089639	1.5065495440542054e-4
X	CB4853	0.6095971267113204	C	1e-5	1e-5	0.692965	0.306945	1e-5	1e-5	1e-5	1e-5	1e-5	1e-5	1e-5	FALSE	61711850	100089639	0.6165658165676869
X	CB4855	0.6833447148933359	C	1e-5	1e-5	0.815787	0.184123	1e-5	1e-5	1e-5	1e-5	1e-5	1e-5	1e-5	FALSE	51460060	100089639	0.5141397302871679
X	CB4856	0.03430491170967396	A	0.9999	1e-5	1e-5	1e-5	1e-5	1e-5	1e-5	1e-5	1e-5	1e-5	1e-5	TRUE	3347671	100089639	0.03344672868687237
X	CB4857	0.3262294827915224	C	1e-5	1e-5	0.999899	1e-5	1e-5	1.1e-5	1e-5	1e-5	1e-5	1e-5	1e-5	FALSE	55517237	100089639	0.5546751647290885
X	CB4858	0.7540815533550075	C	1e-5	1e-5	0.9999	1e-5	1e-5	1e-5	1e-5	1e-5	1e-5	1e-5	1e-5	FALSE	60689498	100089639	0.6063514526213847
X	CX11254	0.38711741641114245	C	1e-5	1e-5	0.656296	1e-5	1e-5	1e-5	1e-5	1e-5	1e-5	0.237537	0.106087	FALSE	46254220	100089639	0.4621279531240991
X	CX11262	0.4968321293237815	C	1e-5	1e-5	0.9999	1e-5	1e-5	1e-5	1e-5	1e-5	1e-5	1e-5	1e-5	FALSE	38381772	100089639	0.3834739777610747
X	CX11264	0.07917018416634777	C	1e-5	1e-5	0.9999	1e-5	1e-5	1e-5	1e-5	1e-5	1e-5	1e-5	1e-5	FALSE	34258305	100089639	0.3422762370039121
X	CX11276	0.5350026237729096	C	1e-5	0.015529	0.591298	0.185454	1e-5	1e-5	1e-5	1e-5	0.009696	0.197963	1e-5	FALSE	58350744	100089639	0.5829848582029554
X	CX11285	0.47521821318067226	C	1.1e-5	1e-5	0.662305	1e-5	1e-5	1e-5	1e-5	1e-5	1e-5	0.337604	1e-5	FALSE	44207713	100089639	0.441681211378932
X	CX11292	0.7461927578890499	C	1e-5	1e-5	0.727048	0.272862	1e-5	1e-5	1e-5	1e-5	1e-5	1e-5	1e-5	FALSE	63494663	100089639	0.6343779799225772
X	CX11307	0.2971307156989626	C	1e-5	1e-5	0.59957	0.183651	1e-5	1e-5	0.038083	1e-5	0.070271	0.057709	0.050666	FALSE	40583755	100089639	0.4054740870830796
X	CX11314	0.7540815533550075	C	1e-5	1e-5	0.9999	1e-5	1e-5	1e-5	1e-5	1e-5	1e-5	1e-5	1e-5	FALSE	48269418	100089639	0.48226188526866404
X	CX11315	0.664605128115794	C	1e-5	1e-5	0.855784	0.144126	1e-5	1e-5	1e-5	1e-5	1e-5	1e-5	1e-5	FALSE	55969862	100089639	0.5591973610775037
X	DL226	0.6215169400484575	C	1e-5	0.054011	0.722598	0.137152	1e-5	1e-5	1e-5	2e-5	1e-5	0.070261	0.015908	FALSE	52614627	100089639	0.5256750601328475
X	DL238	0.0322519889827555	A	0.999898	1e-5	1e-5	1e-5	1e-5	1e-5	1e-5	1e-5	1.2e-5	1e-5	1e-5	TRUE	2895303	100089639	0.028927100036798013
X	ECA189	0.15878175492004082	E	1e-5	1e-5	0.157606	1e-5	0.842304	1e-5	1e-5	1e-5	1e-5	1e-5	1e-5	TRUE	17389914	100089639	0.17374339815532755
X	ECA191	1.6430395133752466e-4	H	1e-5	1e-5	1e-5	1e-5	1e-5	1e-5	1e-5	0.9999	1e-5	1e-5	1e-5	TRUE	459647	100089639	0.0045923534602817385
X	ECA347	0	F	1e-5	1e-5	1e-5	1e-5	1e-5	0.9999	1e-5	1e-5	1e-5	1e-5	1e-5	TRUE	115824	100089639	0.0011572026950761607
X	ECA348	0.1609156136037111	C	1e-5	1e-5	0.9999	1e-5	1e-5	1e-5	1e-5	1e-5	1e-5	1e-5	1e-5	FALSE	26624958	100089639	0.26601113028292567
X	ECA349	0.2961392360889981	C	1e-5	1e-5	0.9999	1e-5	1e-5	1e-5	1e-5	1e-5	1e-5	1e-5	1e-5	FALSE	47850347	100089639	0.47807492841491817
X	ECA36	0	F	1.3e-5	1.9e-5	1e-5	1e-5	1e-5	0.999888	1e-5	1e-5	1e-5	1e-5	1e-5	FALSE	302212	100089639	0.0030194134279972777
X	ECA363	0	F	1e-5	1e-5	1e-5	1e-5	1e-5	0.9999	1e-5	1e-5	1e-5	1e-5	1e-5	TRUE	707350	100089639	0.007067165063908363
X	ECA369	0.0038735010021692644	A	0.9999	1e-5	1e-5	1e-5	1e-5	1e-5	1e-5	1e-5	1e-5	1e-5	1e-5	TRUE	2317366	100089639	0.02315290596662058
X	ECA372	0.22444655019957982	E	1.8e-5	1e-5	0.232283	1e-5	0.766152	1e-5	1e-5	1e-5	1e-5	0.001477	1e-5	TRUE	14575644	100089639	0.14562590239735004
X	ECA396	1.6430395133752466e-4	H	1e-5	1e-5	1e-5	1e-5	1e-5	1e-5	1e-5	0.9999	1e-5	1e-5	1e-5	TRUE	680265	100089639	0.006796557633702725
X	ECA701	1.7080823856775368e-4	F	0.250814	1e-5	1e-5	1e-5	1e-5	0.58748	1e-5	0.161626	1e-5	1e-5	1e-5	TRUE	181973	100089639	0.0018181002730961993
X	ECA703	0.07044261844278767	A	0.9999	1e-5	1e-5	1e-5	1e-5	1e-5	1e-5	1e-5	1e-5	1e-5	1e-5	TRUE	5438720	100089639	0.05433849151958676
X	ECA705	0.06919108046165282	E	1e-5	1e-5	1e-5	1e-5	0.9999	1e-5	1e-5	1e-5	1e-5	1e-5	1e-5	TRUE	13230104	100089639	0.1321825528814226
X	ECA706	0.047444307181988714	A	0.856741	1e-5	1e-5	1e-5	0.143163	1e-5	1e-5	1.6e-5	1e-5	1e-5	1e-5	TRUE	6287738	100089639	0.06282106782301412
X	ECA710	0.09812984208834903	E	1e-5	1e-5	0.071425	1e-5	0.928485	1e-5	1e-5	1e-5	1e-5	1e-5	1e-5	TRUE	13461028	100089639	0.13448972475562632
X	ECA712	0.08845943751150269	E	1e-5	1e-5	1e-5	1e-5	0.9999	1e-5	1e-5	1e-5	1e-5	1e-5	1e-5	TRUE	11054263	100089639	0.11044362943501075
X	ECA722	1.6430395133752466e-4	H	1e-5	1e-5	1e-5	1e-5	1e-5	1e-5	1e-5	0.9999	1e-5	1e-5	1e-5	TRUE	871800	100089639	0.008710192270750422
X	ECA723	1.6430395133752466e-4	H	1.3e-5	1.6e-5	1e-5	1e-5	1e-5	1e-5	1e-5	0.999884	1.7e-5	1e-5	1e-5	TRUE	495633	100089639	0.004951891174270296
X	ECA724	0	F	1e-5	1e-5	0.008431	1e-5	1e-5	0.991476	1.3e-5	1e-5	1e-5	1e-5	1e-5	TRUE	1184468	100089639	0.011834072056149588
X	ECA730	1.6430395133752466e-4	H	1e-5	1e-5	1e-5	1e-5	1e-5	1e-5	1e-5	0.9999	1e-5	1e-5	1e-5	TRUE	1300314	100089639	0.012991494554196563
X	ECA732	0.030423153090673272	A	0.9999	1e-5	1e-5	1e-5	1e-5	1e-5	1e-5	1e-5	1e-5	1e-5	1e-5	TRUE	2459989	100089639	0.024577858653281784
X	ECA733	0.03477661393141405	A	0.9999	1e-5	1e-5	1e-5	1e-5	1e-5	1e-5	1e-5	1e-5	1e-5	1e-5	TRUE	2515978	100089639	0.02513724722296181
X	ECA738	0.08214756406524965	E	1e-5	1e-5	0.279258	1e-5	0.720652	1e-5	1e-5	1e-5	1e-5	1e-5	1e-5	TRUE	11415172	100089639	0.11404948718018655
X	ECA740	0	F	1e-5	1e-5	1e-5	1e-5	1e-5	0.999895	1e-5	1e-5	1.5e-5	1e-5	1e-5	TRUE	245004	100089639	0.002447845775525277
X	ECA741	0	F	1e-5	1e-5	1e-5	1e-5	1e-5	0.999898	1e-5	1.2e-5	1e-5	1e-5	1e-5	TRUE	513117	100089639	0.005126574589803446
X	ECA742	0	F	1e-5	1.2e-5	1e-5	1e-5	1.3e-5	0.999881	1e-5	1.6e-5	1e-5	1.8e-5	1e-5	TRUE	303556	100089639	0.003032841391305248
X	ECA743	0.0451226725539327	E	1e-5	0.044726	0.025694	0.052205	0.84473	1e-5	1e-5	1e-5	0.032585	1e-5	1e-5	TRUE	16035610	100089639	0.16021248712866273
X	ECA744	1.6430395133752466e-4	H	1e-5	1e-5	1e-5	1e-5	1e-5	1e-5	1e-5	0.9999	1e-5	1e-5	1e-5	TRUE	849596	100089639	0.008488351126933328
X	ECA745	1.6430395133752466e-4	H	1e-5	1e-5	1e-5	1.2e-5	1e-5	1e-5	1e-5	0.999898	1e-5	1e-5	1e-5	TRUE	452478	100089639	0.004520727664928435
X	ECA746	1.6430395133752466e-4	H	1e-5	1e-5	1e-5	1e-5	1e-5	1e-5	1e-5	0.9999	1e-5	1e-5	1e-5	TRUE	1038498	100089639	0.010375679344792122
X	ECA760	0.04252638732770284	E	1e-5	1e-5	1e-5	1e-5	0.9999	1e-5	1e-5	1e-5	1e-5	1e-5	1e-5	TRUE	12683445	100089639	0.12672085868947933
X	ECA768	0.04428989755238581	E	1e-5	1e-5	1e-5	1.1e-5	0.999899	1e-5	1e-5	1e-5	1e-5	1e-5	1e-5	TRUE	6682588	100089639	0.06676603159693682
X	ECA777	0.04252638732770284	E	1e-5	1e-5	1e-5	1e-5	0.999896	1e-5	1e-5	1e-5	1.4e-5	1e-5	1e-5	TRUE	12833522	100089639	0.1282202846190703
X	ECA778	0.04252638732770284	E	1e-5	1e-5	1e-5	1e-5	0.999896	1e-5	1e-5	1e-5	1.4e-5	1e-5	1e-5	TRUE	12568012	100089639	0.12556756249265721
X	ECA807	0.01313656752134509	E	1e-5	1e-5	1e-5	1e-5	0.9999	1e-5	1e-5	1e-5	1e-5	1e-5	1e-5	TRUE	7087034	100089639	0.07080686943031136
X	ECA812	0.031533519759402454	E	1e-5	1e-5	1e-5	1e-5	0.999899	1e-5	1e-5	1.1e-5	1e-5	1e-5	1e-5	TRUE	7581509	100089639	0.0757471909754815
X	ED3011	0.6748392564389333	C	1e-5	1e-5	0.335005	0.242701	1e-5	1e-5	1e-5	1e-5	1e-5	0.135938	0.286286	FALSE	56474072	100089639	0.5642349454372595
X	JU1172	0.7540815533550075	C	1e-5	1e-5	0.765549	0.234361	1e-5	1e-5	1e-5	1e-5	1e-5	1e-5	1e-5	FALSE	61572965	100089639	0.615178210403976
X	JU2016	0.7540815533550075	C	1e-5	1e-5	0.686517	0.313393	1e-5	1e-5	1e-5	1e-5	1e-5	1e-5	1e-5	FALSE	62607866	100089639	0.6255179519630398
X	JU2017	0.5877206636001875	C	0.130618	0.068426	0.40346	0.272208	1e-5	1e-5	1e-5	1e-5	1e-5	0.085963	0.039275	FALSE	45922442	100089639	0.4588131444854147
X	JU2862	0.2246937131143285	C	1e-5	0.003358	0.426445	0.334683	1e-5	1e-5	0.030298	1e-5	0.135274	0.069892	1e-5	FALSE	54144389	100089639	0.5409589797801149
X	JU2866	0.24734039695155935	C	1e-5	1e-5	0.9999	1e-5	1e-5	1e-5	1e-5	1e-5	1e-5	1e-5	1e-5	FALSE	50771086	100089639	0.5072561606501548
X	MY23	0.03252579119563844	E	1e-5	1e-5	1e-5	1e-5	0.510437	1e-5	1e-5	1e-5	1e-5	1e-5	0.489473	FALSE	10794302	100089639	0.10784634761246366
X	PB306	0.1731879593087266	C	1e-5	1e-5	0.9999	1e-5	1e-5	1e-5	1e-5	1e-5	1e-5	1e-5	1e-5	FALSE	33704149	100089639	0.3367396399541415
X	PS2025	0.36795295827991803	C	1e-5	1e-5	0.9999	1e-5	1e-5	1e-5	1e-5	1e-5	1e-5	1e-5	1e-5	FALSE	30506886	100089639	0.30479564423246647
X	QG556	0.17421343088934646	C	1e-5	1e-5	0.860267	1e-5	0.139643	1e-5	1e-5	1e-5	1e-5	1e-5	1e-5	FALSE	29772807	100089639	0.297461428550062
X	QG557	0.3463660773480788	C	1e-5	1e-5	0.9999	1e-5	1e-5	1e-5	1e-5	1e-5	1e-5	1e-5	1e-5	FALSE	46090020	100089639	0.46048742367828904
X	QX1211	0	F	1e-5	1e-5	1e-5	1e-5	1e-5	0.9999	1e-5	1e-5	1e-5	1e-5	1e-5	FALSE	439015	100089639	0.004386218237833788
X	QX1212	0.7540815533550075	C	0.043174	1e-5	0.806142	1e-5	1e-5	1e-5	1e-5	1e-5	1e-5	1e-5	0.150604	FALSE	46430681	100089639	0.463890982761962
X	QX1233	0.6630663268751605	C	1e-5	1e-5	0.855445	0.144465	1e-5	1e-5	1e-5	1e-5	1e-5	1e-5	1e-5	FALSE	48020451	100089639	0.4797744449852597
X	QX1791	0.18088072121346696	A	0.559108	0.107565	0.137053	1e-5	0.061847	1e-5	1e-5	1e-5	1e-5	1e-5	0.134366	TRUE	19071168	100089639	0.19054088105962697
X	QX1792	0.4612300365043223	E	1e-5	1e-5	1e-5	0.220457	0.617955	1e-5	1e-5	1e-5	1e-5	0.161508	1e-5	TRUE	26507474	100089639	0.2648373424545971
X	QX1793	0.05280734651889982	E	1e-5	1e-5	1e-5	1e-5	0.875683	1e-5	1e-5	1.2e-5	1e-5	0.124224	1e-5	TRUE	14026859	100089639	0.14014296724559072
X	QX1794	0.028494094616226127	E	1e-5	1e-5	0.10701	0.037616	0.855294	1e-5	1e-5	1e-5	1e-5	1e-5	1e-5	TRUE	11802225	100089639	0.11791655078304358
X	XZ1513	0.08105314703998938	E	1e-5	1e-5	0.156637	1e-5	0.843273	1e-5	1e-5	1e-5	1e-5	1e-5	1e-5	TRUE	15048046	100089639	0.15034569162548383
X	XZ1514	0	F	1e-5	1.2e-5	1e-5	1e-5	1e-5	0.999894	1e-5	1e-5	1.3e-5	1e-5	1e-5	TRUE	1071398	100089639	0.010704384696601814
X	XZ1515	0.05140185488697641	E	1e-5	1e-5	0.334387	1e-5	0.569182	0.096351	1e-5	1e-5	1e-5	1e-5	1e-5	TRUE	17483115	100089639	0.174674573459097
X	XZ1516	0	F	0.174719	1e-5	1e-5	1e-5	1e-5	0.624136	1e-5	0.201065	1e-5	1e-5	1e-5	TRUE	15079	100089639	1.5065495440542054e-4
