# Supplementary material for: Deep sampling of Hawaiian Caenorhabditis elegans reveals high genetic diversity and admixture with global populations
Source: eLife journal article supplement (doi:10.7554/elife.50465), 2019-12-03
Supplement: supp [file elife-50465-supp-v1.zip › elife_poa_e50465_Figure_7_source_data_1.csv]

chromosome	start	stop	haplotype	isotype	sat	plotpoint	segment	cvalue	hap_length	color	chrom_haplotype_sum	swept_haplotype	swept_haplotype_name	isotype_has_swept_haplotype	isotypes_w_haplotype	isotype_swept_haplotype_length	max_swept_haplotype_length	max_haplotype_shared	filtered_swept_haplotype_len	filtered_sweep_len	filtered_sweep_ratio	is_swept	max_pop_frac	pop_assignment	A	B	C	D	E	F	G	H	I	J	K	Hawaiian
I	3663	2785019	NIC2	AB1	1	35	1	1	2781356	#CC0000	2453905988	TRUE	NIC2	TRUE	276	13245741	15037759	0.8808321106888334	2781356	12922069	0.8593081588819185	TRUE	0.542764	D	1e-5	0.457146	1e-5	0.542764	1e-5	1e-5	1e-5	1e-5	1e-5	1e-5	1e-5	FALSE
I	2785019	2864069	ED3048	AB1	0.9	35	2	4	79050	#CC0B00	150684368	FALSE	NIC2	TRUE	276	13245741	15037759	0.8808321106888334	0	12922069	0.8593081588819185	TRUE	0.542764	D	1e-5	0.457146	1e-5	0.542764	1e-5	1e-5	1e-5	1e-5	1e-5	1e-5	1e-5	FALSE
I	2864069	2866511	NIC2	AB1	1	35	3	1	2442	#CC0000	2453905988	TRUE	NIC2	TRUE	276	13245741	15037759	0.8808321106888334	0	12922069	0.8593081588819185	TRUE	0.542764	D	1e-5	0.457146	1e-5	0.542764	1e-5	1e-5	1e-5	1e-5	1e-5	1e-5	1e-5	FALSE
I	2866511	2867958	ED3048	AB1	0.9	35	4	4	1447	#CC0B00	150684368	FALSE	NIC2	TRUE	276	13245741	15037759	0.8808321106888334	0	12922069	0.8593081588819185	TRUE	0.542764	D	1e-5	0.457146	1e-5	0.542764	1e-5	1e-5	1e-5	1e-5	1e-5	1e-5	1e-5	FALSE
I	2867958	13008671	NIC2	AB1	1	35	5	1	10140713	#CC0000	2453905988	TRUE	NIC2	TRUE	276	13245741	15037759	0.8808321106888334	10140713	12922069	0.8593081588819185	TRUE	0.542764	D	1e-5	0.457146	1e-5	0.542764	1e-5	1e-5	1e-5	1e-5	1e-5	1e-5	1e-5	FALSE
I	13008671	13161051	AB1	AB1	1	35	6	35	152380	#FFA000	12133383	FALSE	NIC2	TRUE	276	13245741	15037759	0.8808321106888334	0	12922069	0.8593081588819185	TRUE	0.542764	D	1e-5	0.457146	1e-5	0.542764	1e-5	1e-5	1e-5	1e-5	1e-5	1e-5	1e-5	FALSE
I	13161051	13178596	NIC2	AB1	1	35	7	1	17545	#CC0000	2453905988	TRUE	NIC2	TRUE	276	13245741	15037759	0.8808321106888334	0	12922069	0.8593081588819185	TRUE	0.542764	D	1e-5	0.457146	1e-5	0.542764	1e-5	1e-5	1e-5	1e-5	1e-5	1e-5	1e-5	FALSE
I	13178596	13352250	AB1	AB1	1	35	8	35	173654	#FFA000	12133383	FALSE	NIC2	TRUE	276	13245741	15037759	0.8808321106888334	0	12922069	0.8593081588819185	TRUE	0.542764	D	1e-5	0.457146	1e-5	0.542764	1e-5	1e-5	1e-5	1e-5	1e-5	1e-5	1e-5	FALSE
I	13352250	13355584	NIC2	AB1	1	35	9	1	3334	#CC0000	2453905988	TRUE	NIC2	TRUE	276	13245741	15037759	0.8808321106888334	0	12922069	0.8593081588819185	TRUE	0.542764	D	1e-5	0.457146	1e-5	0.542764	1e-5	1e-5	1e-5	1e-5	1e-5	1e-5	1e-5	FALSE
I	13355584	13355703	AB1	AB1	1	35	10	35	119	#FFA000	12133383	FALSE	NIC2	TRUE	276	13245741	15037759	0.8808321106888334	0	12922069	0.8593081588819185	TRUE	0.542764	D	1e-5	0.457146	1e-5	0.542764	1e-5	1e-5	1e-5	1e-5	1e-5	1e-5	1e-5	FALSE
I	13355703	13368358	NIC2	AB1	1	35	11	1	12655	#CC0000	2453905988	TRUE	NIC2	TRUE	276	13245741	15037759	0.8808321106888334	0	12922069	0.8593081588819185	TRUE	0.542764	D	1e-5	0.457146	1e-5	0.542764	1e-5	1e-5	1e-5	1e-5	1e-5	1e-5	1e-5	FALSE
I	13368358	13952112	AB1	AB1	1	35	12	35	583754	#FFA000	12133383	FALSE	NIC2	TRUE	276	13245741	15037759	0.8808321106888334	0	12922069	0.8593081588819185	TRUE	0.542764	D	1e-5	0.457146	1e-5	0.542764	1e-5	1e-5	1e-5	1e-5	1e-5	1e-5	1e-5	FALSE
I	13952112	13952820	NIC2	AB1	1	35	13	1	708	#CC0000	2453905988	TRUE	NIC2	TRUE	276	13245741	15037759	0.8808321106888334	0	12922069	0.8593081588819185	TRUE	0.542764	D	1e-5	0.457146	1e-5	0.542764	1e-5	1e-5	1e-5	1e-5	1e-5	1e-5	1e-5	FALSE
I	13952820	13953879	AB1	AB1	1	35	14	35	1059	#FFA000	12133383	FALSE	NIC2	TRUE	276	13245741	15037759	0.8808321106888334	0	12922069	0.8593081588819185	TRUE	0.542764	D	1e-5	0.457146	1e-5	0.542764	1e-5	1e-5	1e-5	1e-5	1e-5	1e-5	1e-5	FALSE
I	13953879	14146937	NIC2	AB1	1	35	15	1	193058	#CC0000	2453905988	TRUE	NIC2	TRUE	276	13245741	15037759	0.8808321106888334	0	12922069	0.8593081588819185	TRUE	0.542764	D	1e-5	0.457146	1e-5	0.542764	1e-5	1e-5	1e-5	1e-5	1e-5	1e-5	1e-5	FALSE
I	14146937	14402658	PX179	AB1	0.9	35	16	6	255721	#FF7466	26998152	FALSE	NIC2	TRUE	276	13245741	15037759	0.8808321106888334	0	12922069	0.8593081588819185	TRUE	0.542764	D	1e-5	0.457146	1e-5	0.542764	1e-5	1e-5	1e-5	1e-5	1e-5	1e-5	1e-5	FALSE
I	14402658	14496588	NIC2	AB1	1	35	17	1	93930	#CC0000	2453905988	TRUE	NIC2	TRUE	276	13245741	15037759	0.8808321106888334	0	12922069	0.8593081588819185	TRUE	0.542764	D	1e-5	0.457146	1e-5	0.542764	1e-5	1e-5	1e-5	1e-5	1e-5	1e-5	1e-5	FALSE
I	14496588	15041422	PX179	AB1	0.9	35	18	6	544834	#FF7466	26998152	FALSE	NIC2	TRUE	276	13245741	15037759	0.8808321106888334	0	12922069	0.8593081588819185	TRUE	0.542764	D	1e-5	0.457146	1e-5	0.542764	1e-5	1e-5	1e-5	1e-5	1e-5	1e-5	1e-5	FALSE
I	3663	93212	BRC20067	BRC20067	0.9	24	1	24	89549	#FFA766	268647	FALSE	NIC2	TRUE	276	8005689	15037759	0.532372476510629	0	5691085	0.37845299954600947	TRUE	0.999899	D	1e-5	1e-5	1e-5	0.999899	1e-5	1e-5	1e-5	1e-5	1.1e-5	1e-5	1e-5	FALSE
I	93212	448892	QG536	BRC20067	1	24	2	7	355680	#CC1700	59985814	FALSE	NIC2	TRUE	276	8005689	15037759	0.532372476510629	0	5691085	0.37845299954600947	TRUE	0.999899	D	1e-5	1e-5	1e-5	0.999899	1e-5	1e-5	1e-5	1e-5	1.1e-5	1e-5	1e-5	FALSE
I	448892	528414	ED3048	BRC20067	0.9	24	3	4	79522	#CC0B00	150684368	FALSE	NIC2	TRUE	276	8005689	15037759	0.532372476510629	0	5691085	0.37845299954600947	TRUE	0.999899	D	1e-5	1e-5	1e-5	0.999899	1e-5	1e-5	1e-5	1e-5	1.1e-5	1e-5	1e-5	FALSE
I	528414	835064	QG536	BRC20067	1	24	4	7	306650	#CC1700	59985814	FALSE	NIC2	TRUE	276	8005689	15037759	0.532372476510629	0	5691085	0.37845299954600947	TRUE	0.999899	D	1e-5	1e-5	1e-5	0.999899	1e-5	1e-5	1e-5	1e-5	1.1e-5	1e-5	1e-5	FALSE
I	835064	843028	ED3048	BRC20067	0.9	24	5	4	7964	#CC0B00	150684368	FALSE	NIC2	TRUE	276	8005689	15037759	0.532372476510629	0	5691085	0.37845299954600947	TRUE	0.999899	D	1e-5	1e-5	1e-5	0.999899	1e-5	1e-5	1e-5	1e-5	1.1e-5	1e-5	1e-5	FALSE
I	843028	844068	QG536	BRC20067	1	24	6	7	1040	#CC1700	59985814	FALSE	NIC2	TRUE	276	8005689	15037759	0.532372476510629	0	5691085	0.37845299954600947	TRUE	0.999899	D	1e-5	1e-5	1e-5	0.999899	1e-5	1e-5	1e-5	1e-5	1.1e-5	1e-5	1e-5	FALSE
I	844068	864435	NIC2	BRC20067	1	24	7	1	20367	#CC0000	2453905988	TRUE	NIC2	TRUE	276	8005689	15037759	0.532372476510629	0	5691085	0.37845299954600947	TRUE	0.999899	D	1e-5	1e-5	1e-5	0.999899	1e-5	1e-5	1e-5	1e-5	1.1e-5	1e-5	1e-5	FALSE
I	864435	1017980	QG536	BRC20067	1	24	8	7	153545	#CC1700	59985814	FALSE	NIC2	TRUE	276	8005689	15037759	0.532372476510629	0	5691085	0.37845299954600947	TRUE	0.999899	D	1e-5	1e-5	1e-5	0.999899	1e-5	1e-5	1e-5	1e-5	1.1e-5	1e-5	1e-5	FALSE
I	1017980	1049837	NIC2	BRC20067	1	24	9	1	31857	#CC0000	2453905988	TRUE	NIC2	TRUE	276	8005689	15037759	0.532372476510629	0	5691085	0.37845299954600947	TRUE	0.999899	D	1e-5	1e-5	1e-5	0.999899	1e-5	1e-5	1e-5	1e-5	1.1e-5	1e-5	1e-5	FALSE
I	1049837	1091061	QG536	BRC20067	1	24	10	7	41224	#CC1700	59985814	FALSE	NIC2	TRUE	276	8005689	15037759	0.532372476510629	0	5691085	0.37845299954600947	TRUE	0.999899	D	1e-5	1e-5	1e-5	0.999899	1e-5	1e-5	1e-5	1e-5	1.1e-5	1e-5	1e-5	FALSE
I	1091061	1136414	NIC2	BRC20067	1	24	11	1	45353	#CC0000	2453905988	TRUE	NIC2	TRUE	276	8005689	15037759	0.532372476510629	0	5691085	0.37845299954600947	TRUE	0.999899	D	1e-5	1e-5	1e-5	0.999899	1e-5	1e-5	1e-5	1e-5	1.1e-5	1e-5	1e-5	FALSE
I	1136414	1150297	QG536	BRC20067	1	24	12	7	13883	#CC1700	59985814	FALSE	NIC2	TRUE	276	8005689	15037759	0.532372476510629	0	5691085	0.37845299954600947	TRUE	0.999899	D	1e-5	1e-5	1e-5	0.999899	1e-5	1e-5	1e-5	1e-5	1.1e-5	1e-5	1e-5	FALSE
I	1150297	1175482	ED3048	BRC20067	0.9	24	13	4	25185	#CC0B00	150684368	FALSE	NIC2	TRUE	276	8005689	15037759	0.532372476510629	0	5691085	0.37845299954600947	TRUE	0.999899	D	1e-5	1e-5	1e-5	0.999899	1e-5	1e-5	1e-5	1e-5	1.1e-5	1e-5	1e-5	FALSE
I	1175482	1182670	QG536	BRC20067	1	24	14	7	7188	#CC1700	59985814	FALSE	NIC2	TRUE	276	8005689	15037759	0.532372476510629	0	5691085	0.37845299954600947	TRUE	0.999899	D	1e-5	1e-5	1e-5	0.999899	1e-5	1e-5	1e-5	1e-5	1.1e-5	1e-5	1e-5	FALSE
I	1182670	1190482	ED3048	BRC20067	0.9	24	15	4	7812	#CC0B00	150684368	FALSE	NIC2	TRUE	276	8005689	15037759	0.532372476510629	0	5691085	0.37845299954600947	TRUE	0.999899	D	1e-5	1e-5	1e-5	0.999899	1e-5	1e-5	1e-5	1e-5	1.1e-5	1e-5	1e-5	FALSE
I	1190482	1242553	NIC2	BRC20067	1	24	16	1	52071	#CC0000	2453905988	TRUE	NIC2	TRUE	276	8005689	15037759	0.532372476510629	0	5691085	0.37845299954600947	TRUE	0.999899	D	1e-5	1e-5	1e-5	0.999899	1e-5	1e-5	1e-5	1e-5	1.1e-5	1e-5	1e-5	FALSE
I	1242553	1344494	ED3048	BRC20067	0.9	24	17	4	101941	#CC0B00	150684368	FALSE	NIC2	TRUE	276	8005689	15037759	0.532372476510629	0	5691085	0.37845299954600947	TRUE	0.999899	D	1e-5	1e-5	1e-5	0.999899	1e-5	1e-5	1e-5	1e-5	1.1e-5	1e-5	1e-5	FALSE
I	1344494	1420764	NIC2	BRC20067	1	24	18	1	76270	#CC0000	2453905988	TRUE	NIC2	TRUE	276	8005689	15037759	0.532372476510629	0	5691085	0.37845299954600947	TRUE	0.999899	D	1e-5	1e-5	1e-5	0.999899	1e-5	1e-5	1e-5	1e-5	1.1e-5	1e-5	1e-5	FALSE
I	1420764	1443616	ED3048	BRC20067	0.9	24	19	4	22852	#CC0B00	150684368	FALSE	NIC2	TRUE	276	8005689	15037759	0.532372476510629	0	5691085	0.37845299954600947	TRUE	0.999899	D	1e-5	1e-5	1e-5	0.999899	1e-5	1e-5	1e-5	1e-5	1.1e-5	1e-5	1e-5	FALSE
I	1443616	1454609	QG536	BRC20067	1	24	20	7	10993	#CC1700	59985814	FALSE	NIC2	TRUE	276	8005689	15037759	0.532372476510629	0	5691085	0.37845299954600947	TRUE	0.999899	D	1e-5	1e-5	1e-5	0.999899	1e-5	1e-5	1e-5	1e-5	1.1e-5	1e-5	1e-5	FALSE
I	1454609	1463349	NIC2	BRC20067	1	24	21	1	8740	#CC0000	2453905988	TRUE	NIC2	TRUE	276	8005689	15037759	0.532372476510629	0	5691085	0.37845299954600947	TRUE	0.999899	D	1e-5	1e-5	1e-5	0.999899	1e-5	1e-5	1e-5	1e-5	1.1e-5	1e-5	1e-5	FALSE
I	1463349	1486678	QG536	BRC20067	1	24	22	7	23329	#CC1700	59985814	FALSE	NIC2	TRUE	276	8005689	15037759	0.532372476510629	0	5691085	0.37845299954600947	TRUE	0.999899	D	1e-5	1e-5	1e-5	0.999899	1e-5	1e-5	1e-5	1e-5	1.1e-5	1e-5	1e-5	FALSE
I	1486678	1610423	NIC2	BRC20067	1	24	23	1	123745	#CC0000	2453905988	TRUE	NIC2	TRUE	276	8005689	15037759	0.532372476510629	0	5691085	0.37845299954600947	TRUE	0.999899	D	1e-5	1e-5	1e-5	0.999899	1e-5	1e-5	1e-5	1e-5	1.1e-5	1e-5	1e-5	FALSE
I	1610423	1640212	ED3048	BRC20067	0.9	24	24	4	29789	#CC0B00	150684368	FALSE	NIC2	TRUE	276	8005689	15037759	0.532372476510629	0	5691085	0.37845299954600947	TRUE	0.999899	D	1e-5	1e-5	1e-5	0.999899	1e-5	1e-5	1e-5	1e-5	1.1e-5	1e-5	1e-5	FALSE
I	1640212	1660874	NIC2	BRC20067	1	24	25	1	20662	#CC0000	2453905988	TRUE	NIC2	TRUE	276	8005689	15037759	0.532372476510629	0	5691085	0.37845299954600947	TRUE	0.999899	D	1e-5	1e-5	1e-5	0.999899	1e-5	1e-5	1e-5	1e-5	1.1e-5	1e-5	1e-5	FALSE
I	1660874	1750821	ED3048	BRC20067	0.9	24	26	4	89947	#CC0B00	150684368	FALSE	NIC2	TRUE	276	8005689	15037759	0.532372476510629	0	5691085	0.37845299954600947	TRUE	0.999899	D	1e-5	1e-5	1e-5	0.999899	1e-5	1e-5	1e-5	1e-5	1.1e-5	1e-5	1e-5	FALSE
I	1750821	1781567	NIC2	BRC20067	1	24	27	1	30746	#CC0000	2453905988	TRUE	NIC2	TRUE	276	8005689	15037759	0.532372476510629	0	5691085	0.37845299954600947	TRUE	0.999899	D	1e-5	1e-5	1e-5	0.999899	1e-5	1e-5	1e-5	1e-5	1.1e-5	1e-5	1e-5	FALSE
I	1781567	1825779	ED3048	BRC20067	0.9	24	28	4	44212	#CC0B00	150684368	FALSE	NIC2	TRUE	276	8005689	15037759	0.532372476510629	0	5691085	0.37845299954600947	TRUE	0.999899	D	1e-5	1e-5	1e-5	0.999899	1e-5	1e-5	1e-5	1e-5	1.1e-5	1e-5	1e-5	FALSE
I	1825779	1829697	NIC2	BRC20067	1	24	29	1	3918	#CC0000	2453905988	TRUE	NIC2	TRUE	276	8005689	15037759	0.532372476510629	0	5691085	0.37845299954600947	TRUE	0.999899	D	1e-5	1e-5	1e-5	0.999899	1e-5	1e-5	1e-5	1e-5	1.1e-5	1e-5	1e-5	FALSE
I	1829697	1851727	ED3048	BRC20067	0.9	24	30	4	22030	#CC0B00	150684368	FALSE	NIC2	TRUE	276	8005689	15037759	0.532372476510629	0	5691085	0.37845299954600947	TRUE	0.999899	D	1e-5	1e-5	1e-5	0.999899	1e-5	1e-5	1e-5	1e-5	1.1e-5	1e-5	1e-5	FALSE
I	1851727	1874368	NIC2	BRC20067	1	24	31	1	22641	#CC0000	2453905988	TRUE	NIC2	TRUE	276	8005689	15037759	0.532372476510629	0	5691085	0.37845299954600947	TRUE	0.999899	D	1e-5	1e-5	1e-5	0.999899	1e-5	1e-5	1e-5	1e-5	1.1e-5	1e-5	1e-5	FALSE
I	1874368	1881920	ED3048	BRC20067	0.9	24	32	4	7552	#CC0B00	150684368	FALSE	NIC2	TRUE	276	8005689	15037759	0.532372476510629	0	5691085	0.37845299954600947	TRUE	0.999899	D	1e-5	1e-5	1e-5	0.999899	1e-5	1e-5	1e-5	1e-5	1.1e-5	1e-5	1e-5	FALSE
I	1881920	1913957	NIC2	BRC20067	1	24	33	1	32037	#CC0000	2453905988	TRUE	NIC2	TRUE	276	8005689	15037759	0.532372476510629	0	5691085	0.37845299954600947	TRUE	0.999899	D	1e-5	1e-5	1e-5	0.999899	1e-5	1e-5	1e-5	1e-5	1.1e-5	1e-5	1e-5	FALSE
I	1913957	1922747	ED3048	BRC20067	0.9	24	34	4	8790	#CC0B00	150684368	FALSE	NIC2	TRUE	276	8005689	15037759	0.532372476510629	0	5691085	0.37845299954600947	TRUE	0.999899	D	1e-5	1e-5	1e-5	0.999899	1e-5	1e-5	1e-5	1e-5	1.1e-5	1e-5	1e-5	FALSE
I	1922747	1974234	NIC2	BRC20067	1	24	35	1	51487	#CC0000	2453905988	TRUE	NIC2	TRUE	276	8005689	15037759	0.532372476510629	0	5691085	0.37845299954600947	TRUE	0.999899	D	1e-5	1e-5	1e-5	0.999899	1e-5	1e-5	1e-5	1e-5	1.1e-5	1e-5	1e-5	FALSE
I	1974234	1981352	ED3048	BRC20067	0.9	24	36	4	7118	#CC0B00	150684368	FALSE	NIC2	TRUE	276	8005689	15037759	0.532372476510629	0	5691085	0.37845299954600947	TRUE	0.999899	D	1e-5	1e-5	1e-5	0.999899	1e-5	1e-5	1e-5	1e-5	1.1e-5	1e-5	1e-5	FALSE
I	1981352	2040543	NIC2	BRC20067	1	24	37	1	59191	#CC0000	2453905988	TRUE	NIC2	TRUE	276	8005689	15037759	0.532372476510629	0	5691085	0.37845299954600947	TRUE	0.999899	D	1e-5	1e-5	1e-5	0.999899	1e-5	1e-5	1e-5	1e-5	1.1e-5	1e-5	1e-5	FALSE
I	2040543	2161780	ED3048	BRC20067	0.9	24	38	4	121237	#CC0B00	150684368	FALSE	NIC2	TRUE	276	8005689	15037759	0.532372476510629	0	5691085	0.37845299954600947	TRUE	0.999899	D	1e-5	1e-5	1e-5	0.999899	1e-5	1e-5	1e-5	1e-5	1.1e-5	1e-5	1e-5	FALSE
I	2161780	2176348	NIC2	BRC20067	1	24	39	1	14568	#CC0000	2453905988	TRUE	NIC2	TRUE	276	8005689	15037759	0.532372476510629	0	5691085	0.37845299954600947	TRUE	0.999899	D	1e-5	1e-5	1e-5	0.999899	1e-5	1e-5	1e-5	1e-5	1.1e-5	1e-5	1e-5	FALSE
I	2176348	2190339	ED3048	BRC20067	0.9	24	40	4	13991	#CC0B00	150684368	FALSE	NIC2	TRUE	276	8005689	15037759	0.532372476510629	0	5691085	0.37845299954600947	TRUE	0.999899	D	1e-5	1e-5	1e-5	0.999899	1e-5	1e-5	1e-5	1e-5	1.1e-5	1e-5	1e-5	FALSE
I	2190339	2204010	NIC2	BRC20067	1	24	41	1	13671	#CC0000	2453905988	TRUE	NIC2	TRUE	276	8005689	15037759	0.532372476510629	0	5691085	0.37845299954600947	TRUE	0.999899	D	1e-5	1e-5	1e-5	0.999899	1e-5	1e-5	1e-5	1e-5	1.1e-5	1e-5	1e-5	FALSE
I	2204010	2269627	ED3048	BRC20067	0.9	24	42	4	65617	#CC0B00	150684368	FALSE	NIC2	TRUE	276	8005689	15037759	0.532372476510629	0	5691085	0.37845299954600947	TRUE	0.999899	D	1e-5	1e-5	1e-5	0.999899	1e-5	1e-5	1e-5	1e-5	1.1e-5	1e-5	1e-5	FALSE
I	2269627	2465076	QG536	BRC20067	1	24	43	7	195449	#CC1700	59985814	FALSE	NIC2	TRUE	276	8005689	15037759	0.532372476510629	0	5691085	0.37845299954600947	TRUE	0.999899	D	1e-5	1e-5	1e-5	0.999899	1e-5	1e-5	1e-5	1e-5	1.1e-5	1e-5	1e-5	FALSE
I	2465076	2468912	NIC2	BRC20067	1	24	44	1	3836	#CC0000	2453905988	TRUE	NIC2	TRUE	276	8005689	15037759	0.532372476510629	0	5691085	0.37845299954600947	TRUE	0.999899	D	1e-5	1e-5	1e-5	0.999899	1e-5	1e-5	1e-5	1e-5	1.1e-5	1e-5	1e-5	FALSE
I	2468912	2500102	ED3048	BRC20067	0.9	24	45	4	31190	#CC0B00	150684368	FALSE	NIC2	TRUE	276	8005689	15037759	0.532372476510629	0	5691085	0.37845299954600947	TRUE	0.999899	D	1e-5	1e-5	1e-5	0.999899	1e-5	1e-5	1e-5	1e-5	1.1e-5	1e-5	1e-5	FALSE
I	2500102	2513751	NIC2	BRC20067	1	24	46	1	13649	#CC0000	2453905988	TRUE	NIC2	TRUE	276	8005689	15037759	0.532372476510629	0	5691085	0.37845299954600947	TRUE	0.999899	D	1e-5	1e-5	1e-5	0.999899	1e-5	1e-5	1e-5	1e-5	1.1e-5	1e-5	1e-5	FALSE
I	2513751	2576070	ED3048	BRC20067	0.9	24	47	4	62319	#CC0B00	150684368	FALSE	NIC2	TRUE	276	8005689	15037759	0.532372476510629	0	5691085	0.37845299954600947	TRUE	0.999899	D	1e-5	1e-5	1e-5	0.999899	1e-5	1e-5	1e-5	1e-5	1.1e-5	1e-5	1e-5	FALSE
I	2576070	2785019	NIC2	BRC20067	1	24	48	1	208949	#CC0000	2453905988	TRUE	NIC2	TRUE	276	8005689	15037759	0.532372476510629	0	5691085	0.37845299954600947	TRUE	0.999899	D	1e-5	1e-5	1e-5	0.999899	1e-5	1e-5	1e-5	1e-5	1.1e-5	1e-5	1e-5	FALSE
I	2785019	2864069	ED3048	BRC20067	0.9	24	49	4	79050	#CC0B00	150684368	FALSE	NIC2	TRUE	276	8005689	15037759	0.532372476510629	0	5691085	0.37845299954600947	TRUE	0.999899	D	1e-5	1e-5	1e-5	0.999899	1e-5	1e-5	1e-5	1e-5	1.1e-5	1e-5	1e-5	FALSE
I	2864069	2866511	NIC2	BRC20067	1	24	50	1	2442	#CC0000	2453905988	TRUE	NIC2	TRUE	276	8005689	15037759	0.532372476510629	0	5691085	0.37845299954600947	TRUE	0.999899	D	1e-5	1e-5	1e-5	0.999899	1e-5	1e-5	1e-5	1e-5	1.1e-5	1e-5	1e-5	FALSE
I	2866511	2867958	ED3048	BRC20067	0.9	24	51	4	1447	#CC0B00	150684368	FALSE	NIC2	TRUE	276	8005689	15037759	0.532372476510629	0	5691085	0.37845299954600947	TRUE	0.999899	D	1e-5	1e-5	1e-5	0.999899	1e-5	1e-5	1e-5	1e-5	1.1e-5	1e-5	1e-5	FALSE
I	2867958	4977331	NIC2	BRC20067	1	24	52	1	2109373	#CC0000	2453905988	TRUE	NIC2	TRUE	276	8005689	15037759	0.532372476510629	2109373	5691085	0.37845299954600947	TRUE	0.999899	D	1e-5	1e-5	1e-5	0.999899	1e-5	1e-5	1e-5	1e-5	1.1e-5	1e-5	1e-5	FALSE
I	4977331	6027607	MY2535	BRC20067	0.9	24	53	10	1050276	#CC2200	212766310	FALSE	NIC2	TRUE	276	8005689	15037759	0.532372476510629	0	5691085	0.37845299954600947	TRUE	0.999899	D	1e-5	1e-5	1e-5	0.999899	1e-5	1e-5	1e-5	1e-5	1.1e-5	1e-5	1e-5	FALSE
I	6027607	6051212	NIC2	BRC20067	1	24	54	1	23605	#CC0000	2453905988	TRUE	NIC2	TRUE	276	8005689	15037759	0.532372476510629	0	5691085	0.37845299954600947	TRUE	0.999899	D	1e-5	1e-5	1e-5	0.999899	1e-5	1e-5	1e-5	1e-5	1.1e-5	1e-5	1e-5	FALSE
I	6051212	6294577	MY2535	BRC20067	0.9	24	55	10	243365	#CC2200	212766310	FALSE	NIC2	TRUE	276	8005689	15037759	0.532372476510629	0	5691085	0.37845299954600947	TRUE	0.999899	D	1e-5	1e-5	1e-5	0.999899	1e-5	1e-5	1e-5	1e-5	1.1e-5	1e-5	1e-5	FALSE
I	6294577	7659743	NIC2	BRC20067	1	24	56	1	1365166	#CC0000	2453905988	TRUE	NIC2	TRUE	276	8005689	15037759	0.532372476510629	1365166	5691085	0.37845299954600947	TRUE	0.999899	D	1e-5	1e-5	1e-5	0.999899	1e-5	1e-5	1e-5	1e-5	1.1e-5	1e-5	1e-5	FALSE
I	7659743	8014079	MY2535	BRC20067	0.9	24	57	10	354336	#CC2200	212766310	FALSE	NIC2	TRUE	276	8005689	15037759	0.532372476510629	0	5691085	0.37845299954600947	TRUE	0.999899	D	1e-5	1e-5	1e-5	0.999899	1e-5	1e-5	1e-5	1e-5	1.1e-5	1e-5	1e-5	FALSE
I	8014079	8039701	NIC2	BRC20067	1	24	58	1	25622	#CC0000	2453905988	TRUE	NIC2	TRUE	276	8005689	15037759	0.532372476510629	0	5691085	0.37845299954600947	TRUE	0.999899	D	1e-5	1e-5	1e-5	0.999899	1e-5	1e-5	1e-5	1e-5	1.1e-5	1e-5	1e-5	FALSE
I	8039701	8583945	MY2535	BRC20067	0.9	24	59	10	544244	#CC2200	212766310	FALSE	NIC2	TRUE	276	8005689	15037759	0.532372476510629	0	5691085	0.37845299954600947	TRUE	0.999899	D	1e-5	1e-5	1e-5	0.999899	1e-5	1e-5	1e-5	1e-5	1.1e-5	1e-5	1e-5	FALSE
I	8583945	9244655	NIC2	BRC20067	1	24	60	1	660710	#CC0000	2453905988	TRUE	NIC2	TRUE	276	8005689	15037759	0.532372476510629	0	5691085	0.37845299954600947	TRUE	0.999899	D	1e-5	1e-5	1e-5	0.999899	1e-5	1e-5	1e-5	1e-5	1.1e-5	1e-5	1e-5	FALSE
I	9244655	9352778	MY2535	BRC20067	0.9	24	61	10	108123	#CC2200	212766310	FALSE	NIC2	TRUE	276	8005689	15037759	0.532372476510629	0	5691085	0.37845299954600947	TRUE	0.999899	D	1e-5	1e-5	1e-5	0.999899	1e-5	1e-5	1e-5	1e-5	1.1e-5	1e-5	1e-5	FALSE
I	9352778	9750879	NIC2	BRC20067	1	24	62	1	398101	#CC0000	2453905988	TRUE	NIC2	TRUE	276	8005689	15037759	0.532372476510629	0	5691085	0.37845299954600947	TRUE	0.999899	D	1e-5	1e-5	1e-5	0.999899	1e-5	1e-5	1e-5	1e-5	1.1e-5	1e-5	1e-5	FALSE
I	9750879	10041768	MY2535	BRC20067	0.9	24	63	10	290889	#CC2200	212766310	FALSE	NIC2	TRUE	276	8005689	15037759	0.532372476510629	0	5691085	0.37845299954600947	TRUE	0.999899	D	1e-5	1e-5	1e-5	0.999899	1e-5	1e-5	1e-5	1e-5	1.1e-5	1e-5	1e-5	FALSE
I	10041768	10045947	NIC2	BRC20067	1	24	64	1	4179	#CC0000	2453905988	TRUE	NIC2	TRUE	276	8005689	15037759	0.532372476510629	0	5691085	0.37845299954600947	TRUE	0.999899	D	1e-5	1e-5	1e-5	0.999899	1e-5	1e-5	1e-5	1e-5	1.1e-5	1e-5	1e-5	FALSE
I	10045947	10193215	MY2535	BRC20067	0.9	24	65	10	147268	#CC2200	212766310	FALSE	NIC2	TRUE	276	8005689	15037759	0.532372476510629	0	5691085	0.37845299954600947	TRUE	0.999899	D	1e-5	1e-5	1e-5	0.999899	1e-5	1e-5	1e-5	1e-5	1.1e-5	1e-5	1e-5	FALSE
I	10193215	10351020	EG4347	BRC20067	1	24	66	5	157805	#FF1300	122541644	FALSE	NIC2	TRUE	276	8005689	15037759	0.532372476510629	0	5691085	0.37845299954600947	TRUE	0.999899	D	1e-5	1e-5	1e-5	0.999899	1e-5	1e-5	1e-5	1e-5	1.1e-5	1e-5	1e-5	FALSE
I	10351020	10354853	NIC2	BRC20067	1	24	67	1	3833	#CC0000	2453905988	TRUE	NIC2	TRUE	276	8005689	15037759	0.532372476510629	0	5691085	0.37845299954600947	TRUE	0.999899	D	1e-5	1e-5	1e-5	0.999899	1e-5	1e-5	1e-5	1e-5	1.1e-5	1e-5	1e-5	FALSE
I	10354853	10634911	EG4347	BRC20067	1	24	68	5	280058	#FF1300	122541644	FALSE	NIC2	TRUE	276	8005689	15037759	0.532372476510629	0	5691085	0.37845299954600947	TRUE	0.999899	D	1e-5	1e-5	1e-5	0.999899	1e-5	1e-5	1e-5	1e-5	1.1e-5	1e-5	1e-5	FALSE
I	10634911	10639190	NIC2	BRC20067	1	24	69	1	4279	#CC0000	2453905988	TRUE	NIC2	TRUE	276	8005689	15037759	0.532372476510629	0	5691085	0.37845299954600947	TRUE	0.999899	D	1e-5	1e-5	1e-5	0.999899	1e-5	1e-5	1e-5	1e-5	1.1e-5	1e-5	1e-5	FALSE
I	10639190	10733564	EG4347	BRC20067	1	24	70	5	94374	#FF1300	122541644	FALSE	NIC2	TRUE	276	8005689	15037759	0.532372476510629	0	5691085	0.37845299954600947	TRUE	0.999899	D	1e-5	1e-5	1e-5	0.999899	1e-5	1e-5	1e-5	1e-5	1.1e-5	1e-5	1e-5	FALSE
I	10733564	10839040	MY2535	BRC20067	0.9	24	71	10	105476	#CC2200	212766310	FALSE	NIC2	TRUE	276	8005689	15037759	0.532372476510629	0	5691085	0.37845299954600947	TRUE	0.999899	D	1e-5	1e-5	1e-5	0.999899	1e-5	1e-5	1e-5	1e-5	1.1e-5	1e-5	1e-5	FALSE
I	10839040	10840752	NIC2	BRC20067	1	24	72	1	1712	#CC0000	2453905988	TRUE	NIC2	TRUE	276	8005689	15037759	0.532372476510629	0	5691085	0.37845299954600947	TRUE	0.999899	D	1e-5	1e-5	1e-5	0.999899	1e-5	1e-5	1e-5	1e-5	1.1e-5	1e-5	1e-5	FALSE
I	10840752	10846016	MY2535	BRC20067	0.9	24	73	10	5264	#CC2200	212766310	FALSE	NIC2	TRUE	276	8005689	15037759	0.532372476510629	0	5691085	0.37845299954600947	TRUE	0.999899	D	1e-5	1e-5	1e-5	0.999899	1e-5	1e-5	1e-5	1e-5	1.1e-5	1e-5	1e-5	FALSE
I	10846016	10883065	EG4347	BRC20067	1	24	74	5	37049	#FF1300	122541644	FALSE	NIC2	TRUE	276	8005689	15037759	0.532372476510629	0	5691085	0.37845299954600947	TRUE	0.999899	D	1e-5	1e-5	1e-5	0.999899	1e-5	1e-5	1e-5	1e-5	1.1e-5	1e-5	1e-5	FALSE
I	10883065	10908578	NIC2	BRC20067	1	24	75	1	25513	#CC0000	2453905988	TRUE	NIC2	TRUE	276	8005689	15037759	0.532372476510629	0	5691085	0.37845299954600947	TRUE	0.999899	D	1e-5	1e-5	1e-5	0.999899	1e-5	1e-5	1e-5	1e-5	1.1e-5	1e-5	1e-5	FALSE
I	10908578	11031805	EG4347	BRC20067	1	24	76	5	123227	#FF1300	122541644	FALSE	NIC2	TRUE	276	8005689	15037759	0.532372476510629	0	5691085	0.37845299954600947	TRUE	0.999899	D	1e-5	1e-5	1e-5	0.999899	1e-5	1e-5	1e-5	1e-5	1.1e-5	1e-5	1e-5	FALSE
I	11031805	11270976	MY2535	BRC20067	0.9	24	77	10	239171	#CC2200	212766310	FALSE	NIC2	TRUE	276	8005689	15037759	0.532372476510629	0	5691085	0.37845299954600947	TRUE	0.999899	D	1e-5	1e-5	1e-5	0.999899	1e-5	1e-5	1e-5	1e-5	1.1e-5	1e-5	1e-5	FALSE
I	11270976	11271410	NIC2	BRC20067	1	24	78	1	434	#CC0000	2453905988	TRUE	NIC2	TRUE	276	8005689	15037759	0.532372476510629	0	5691085	0.37845299954600947	TRUE	0.999899	D	1e-5	1e-5	1e-5	0.999899	1e-5	1e-5	1e-5	1e-5	1.1e-5	1e-5	1e-5	FALSE
I	11271410	11289130	MY2535	BRC20067	0.9	24	79	10	17720	#CC2200	212766310	FALSE	NIC2	TRUE	276	8005689	15037759	0.532372476510629	0	5691085	0.37845299954600947	TRUE	0.999899	D	1e-5	1e-5	1e-5	0.999899	1e-5	1e-5	1e-5	1e-5	1.1e-5	1e-5	1e-5	FALSE
I	11289130	11333583	NIC2	BRC20067	1	24	80	1	44453	#CC0000	2453905988	TRUE	NIC2	TRUE	276	8005689	15037759	0.532372476510629	0	5691085	0.37845299954600947	TRUE	0.999899	D	1e-5	1e-5	1e-5	0.999899	1e-5	1e-5	1e-5	1e-5	1.1e-5	1e-5	1e-5	FALSE
I	11333583	11370546	MY2535	BRC20067	0.9	24	81	10	36963	#CC2200	212766310	FALSE	NIC2	TRUE	276	8005689	15037759	0.532372476510629	0	5691085	0.37845299954600947	TRUE	0.999899	D	1e-5	1e-5	1e-5	0.999899	1e-5	1e-5	1e-5	1e-5	1.1e-5	1e-5	1e-5	FALSE
I	11370546	11460051	NIC2	BRC20067	1	24	82	1	89505	#CC0000	2453905988	TRUE	NIC2	TRUE	276	8005689	15037759	0.532372476510629	0	5691085	0.37845299954600947	TRUE	0.999899	D	1e-5	1e-5	1e-5	0.999899	1e-5	1e-5	1e-5	1e-5	1.1e-5	1e-5	1e-5	FALSE
I	11460051	11484503	EG4347	BRC20067	1	24	83	5	24452	#FF1300	122541644	FALSE	NIC2	TRUE	276	8005689	15037759	0.532372476510629	0	5691085	0.37845299954600947	TRUE	0.999899	D	1e-5	1e-5	1e-5	0.999899	1e-5	1e-5	1e-5	1e-5	1.1e-5	1e-5	1e-5	FALSE
I	11484503	11511424	MY2535	BRC20067	0.9	24	84	10	26921	#CC2200	212766310	FALSE	NIC2	TRUE	276	8005689	15037759	0.532372476510629	0	5691085	0.37845299954600947	TRUE	0.999899	D	1e-5	1e-5	1e-5	0.999899	1e-5	1e-5	1e-5	1e-5	1.1e-5	1e-5	1e-5	FALSE
I	11511424	11582269	NIC2	BRC20067	1	24	85	1	70845	#CC0000	2453905988	TRUE	NIC2	TRUE	276	8005689	15037759	0.532372476510629	0	5691085	0.37845299954600947	TRUE	0.999899	D	1e-5	1e-5	1e-5	0.999899	1e-5	1e-5	1e-5	1e-5	1.1e-5	1e-5	1e-5	FALSE
I	11582269	11683469	MY2535	BRC20067	0.9	24	86	10	101200	#CC2200	212766310	FALSE	NIC2	TRUE	276	8005689	15037759	0.532372476510629	0	5691085	0.37845299954600947	TRUE	0.999899	D	1e-5	1e-5	1e-5	0.999899	1e-5	1e-5	1e-5	1e-5	1.1e-5	1e-5	1e-5	FALSE
I	11683469	11696737	NIC2	BRC20067	1	24	87	1	13268	#CC0000	2453905988	TRUE	NIC2	TRUE	276	8005689	15037759	0.532372476510629	0	5691085	0.37845299954600947	TRUE	0.999899	D	1e-5	1e-5	1e-5	0.999899	1e-5	1e-5	1e-5	1e-5	1.1e-5	1e-5	1e-5	FALSE
I	11696737	11789824	MY2535	BRC20067	0.9	24	88	10	93087	#CC2200	212766310	FALSE	NIC2	TRUE	276	8005689	15037759	0.532372476510629	0	5691085	0.37845299954600947	TRUE	0.999899	D	1e-5	1e-5	1e-5	0.999899	1e-5	1e-5	1e-5	1e-5	1.1e-5	1e-5	1e-5	FALSE
I	11789824	11798829	NIC2	BRC20067	1	24	89	1	9005	#CC0000	2453905988	TRUE	NIC2	TRUE	276	8005689	15037759	0.532372476510629	0	5691085	0.37845299954600947	TRUE	0.999899	D	1e-5	1e-5	1e-5	0.999899	1e-5	1e-5	1e-5	1e-5	1.1e-5	1e-5	1e-5	FALSE
I	11798829	11862999	MY2535	BRC20067	0.9	24	90	10	64170	#CC2200	212766310	FALSE	NIC2	TRUE	276	8005689	15037759	0.532372476510629	0	5691085	0.37845299954600947	TRUE	0.999899	D	1e-5	1e-5	1e-5	0.999899	1e-5	1e-5	1e-5	1e-5	1.1e-5	1e-5	1e-5	FALSE
I	11862999	11867609	NIC2	BRC20067	1	24	91	1	4610	#CC0000	2453905988	TRUE	NIC2	TRUE	276	8005689	15037759	0.532372476510629	0	5691085	0.37845299954600947	TRUE	0.999899	D	1e-5	1e-5	1e-5	0.999899	1e-5	1e-5	1e-5	1e-5	1.1e-5	1e-5	1e-5	FALSE
I	11867609	12045324	MY2535	BRC20067	0.9	24	92	10	177715	#CC2200	212766310	FALSE	NIC2	TRUE	276	8005689	15037759	0.532372476510629	0	5691085	0.37845299954600947	TRUE	0.999899	D	1e-5	1e-5	1e-5	0.999899	1e-5	1e-5	1e-5	1e-5	1.1e-5	1e-5	1e-5	FALSE
I	12045324	12063574	NIC2	BRC20067	1	24	93	1	18250	#CC0000	2453905988	TRUE	NIC2	TRUE	276	8005689	15037759	0.532372476510629	0	5691085	0.37845299954600947	TRUE	0.999899	D	1e-5	1e-5	1e-5	0.999899	1e-5	1e-5	1e-5	1e-5	1.1e-5	1e-5	1e-5	FALSE
I	12063574	12433277	MY2535	BRC20067	0.9	24	94	10	369703	#CC2200	212766310	FALSE	NIC2	TRUE	276	8005689	15037759	0.532372476510629	0	5691085	0.37845299954600947	TRUE	0.999899	D	1e-5	1e-5	1e-5	0.999899	1e-5	1e-5	1e-5	1e-5	1.1e-5	1e-5	1e-5	FALSE
I	12433277	12435701	NIC2	BRC20067	1	24	95	1	2424	#CC0000	2453905988	TRUE	NIC2	TRUE	276	8005689	15037759	0.532372476510629	0	5691085	0.37845299954600947	TRUE	0.999899	D	1e-5	1e-5	1e-5	0.999899	1e-5	1e-5	1e-5	1e-5	1.1e-5	1e-5	1e-5	FALSE
I	12435701	12440592	EG4347	BRC20067	1	24	96	5	4891	#FF1300	122541644	FALSE	NIC2	TRUE	276	8005689	15037759	0.532372476510629	0	5691085	0.37845299954600947	TRUE	0.999899	D	1e-5	1e-5	1e-5	0.999899	1e-5	1e-5	1e-5	1e-5	1.1e-5	1e-5	1e-5	FALSE
I	12440592	12446310	MY2535	BRC20067	0.9	24	97	10	5718	#CC2200	212766310	FALSE	NIC2	TRUE	276	8005689	15037759	0.532372476510629	0	5691085	0.37845299954600947	TRUE	0.999899	D	1e-5	1e-5	1e-5	0.999899	1e-5	1e-5	1e-5	1e-5	1.1e-5	1e-5	1e-5	FALSE
I	12446310	12450545	NIC2	BRC20067	1	24	98	1	4235	#CC0000	2453905988	TRUE	NIC2	TRUE	276	8005689	15037759	0.532372476510629	0	5691085	0.37845299954600947	TRUE	0.999899	D	1e-5	1e-5	1e-5	0.999899	1e-5	1e-5	1e-5	1e-5	1.1e-5	1e-5	1e-5	FALSE
I	12450545	12476312	MY2535	BRC20067	0.9	24	99	10	25767	#CC2200	212766310	FALSE	NIC2	TRUE	276	8005689	15037759	0.532372476510629	0	5691085	0.37845299954600947	TRUE	0.999899	D	1e-5	1e-5	1e-5	0.999899	1e-5	1e-5	1e-5	1e-5	1.1e-5	1e-5	1e-5	FALSE
I	12476312	12478011	NIC2	BRC20067	1	24	100	1	1699	#CC0000	2453905988	TRUE	NIC2	TRUE	276	8005689	15037759	0.532372476510629	0	5691085	0.37845299954600947	TRUE	0.999899	D	1e-5	1e-5	1e-5	0.999899	1e-5	1e-5	1e-5	1e-5	1.1e-5	1e-5	1e-5	FALSE
I	12478011	12676308	MY2535	BRC20067	0.9	24	101	10	198297	#CC2200	212766310	FALSE	NIC2	TRUE	276	8005689	15037759	0.532372476510629	0	5691085	0.37845299954600947	TRUE	0.999899	D	1e-5	1e-5	1e-5	0.999899	1e-5	1e-5	1e-5	1e-5	1.1e-5	1e-5	1e-5	FALSE
I	12676308	12748430	NIC2	BRC20067	1	24	102	1	72122	#CC0000	2453905988	TRUE	NIC2	TRUE	276	8005689	15037759	0.532372476510629	0	5691085	0.37845299954600947	TRUE	0.999899	D	1e-5	1e-5	1e-5	0.999899	1e-5	1e-5	1e-5	1e-5	1.1e-5	1e-5	1e-5	FALSE
I	12748430	12824876	MY2535	BRC20067	0.9	24	103	10	76446	#CC2200	212766310	FALSE	NIC2	TRUE	276	8005689	15037759	0.532372476510629	0	5691085	0.37845299954600947	TRUE	0.999899	D	1e-5	1e-5	1e-5	0.999899	1e-5	1e-5	1e-5	1e-5	1.1e-5	1e-5	1e-5	FALSE
I	12824876	15041422	NIC2	BRC20067	1	24	104	1	2216546	#CC0000	2453905988	TRUE	NIC2	TRUE	276	8005689	15037759	0.532372476510629	2216546	5691085	0.37845299954600947	TRUE	0.999899	D	1e-5	1e-5	1e-5	0.999899	1e-5	1e-5	1e-5	1e-5	1.1e-5	1e-5	1e-5	FALSE
I	3663	72888	BRC20263	BRC20263	0.9	146	1	146	69225	#00FFAD	138450	FALSE	NIC2	TRUE	276	8864226	15037759	0.5894645605106452	0	6652962	0.44241711813575413	TRUE	0.493992	D	0.142338	1e-5	0.019301	0.493992	1e-5	1e-5	1e-5	1e-5	1e-5	0.344299	1e-5	FALSE
I	72888	448892	QG536	BRC20263	1	146	2	7	376004	#CC1700	59985814	FALSE	NIC2	TRUE	276	8864226	15037759	0.5894645605106452	0	6652962	0.44241711813575413	TRUE	0.493992	D	0.142338	1e-5	0.019301	0.493992	1e-5	1e-5	1e-5	1e-5	1e-5	0.344299	1e-5	FALSE
I	448892	528414	ED3048	BRC20263	0.9	146	3	4	79522	#CC0B00	150684368	FALSE	NIC2	TRUE	276	8864226	15037759	0.5894645605106452	0	6652962	0.44241711813575413	TRUE	0.493992	D	0.142338	1e-5	0.019301	0.493992	1e-5	1e-5	1e-5	1e-5	1e-5	0.344299	1e-5	FALSE
I	528414	835064	QG536	BRC20263	1	146	4	7	306650	#CC1700	59985814	FALSE	NIC2	TRUE	276	8864226	15037759	0.5894645605106452	0	6652962	0.44241711813575413	TRUE	0.493992	D	0.142338	1e-5	0.019301	0.493992	1e-5	1e-5	1e-5	1e-5	1e-5	0.344299	1e-5	FALSE
I	835064	843028	ED3048	BRC20263	0.9	146	5	4	7964	#CC0B00	150684368	FALSE	NIC2	TRUE	276	8864226	15037759	0.5894645605106452	0	6652962	0.44241711813575413	TRUE	0.493992	D	0.142338	1e-5	0.019301	0.493992	1e-5	1e-5	1e-5	1e-5	1e-5	0.344299	1e-5	FALSE
I	843028	844068	QG536	BRC20263	1	146	6	7	1040	#CC1700	59985814	FALSE	NIC2	TRUE	276	8864226	15037759	0.5894645605106452	0	6652962	0.44241711813575413	TRUE	0.493992	D	0.142338	1e-5	0.019301	0.493992	1e-5	1e-5	1e-5	1e-5	1e-5	0.344299	1e-5	FALSE
I	844068	864435	NIC2	BRC20263	1	146	7	1	20367	#CC0000	2453905988	TRUE	NIC2	TRUE	276	8864226	15037759	0.5894645605106452	0	6652962	0.44241711813575413	TRUE	0.493992	D	0.142338	1e-5	0.019301	0.493992	1e-5	1e-5	1e-5	1e-5	1e-5	0.344299	1e-5	FALSE
I	864435	1017980	QG536	BRC20263	1	146	8	7	153545	#CC1700	59985814	FALSE	NIC2	TRUE	276	8864226	15037759	0.5894645605106452	0	6652962	0.44241711813575413	TRUE	0.493992	D	0.142338	1e-5	0.019301	0.493992	1e-5	1e-5	1e-5	1e-5	1e-5	0.344299	1e-5	FALSE
I	1017980	1049837	NIC2	BRC20263	1	146	9	1	31857	#CC0000	2453905988	TRUE	NIC2	TRUE	276	8864226	15037759	0.5894645605106452	0	6652962	0.44241711813575413	TRUE	0.493992	D	0.142338	1e-5	0.019301	0.493992	1e-5	1e-5	1e-5	1e-5	1e-5	0.344299	1e-5	FALSE
I	1049837	1091061	QG536	BRC20263	1	146	10	7	41224	#CC1700	59985814	FALSE	NIC2	TRUE	276	8864226	15037759	0.5894645605106452	0	6652962	0.44241711813575413	TRUE	0.493992	D	0.142338	1e-5	0.019301	0.493992	1e-5	1e-5	1e-5	1e-5	1e-5	0.344299	1e-5	FALSE
I	1091061	1136414	NIC2	BRC20263	1	146	11	1	45353	#CC0000	2453905988	TRUE	NIC2	TRUE	276	8864226	15037759	0.5894645605106452	0	6652962	0.44241711813575413	TRUE	0.493992	D	0.142338	1e-5	0.019301	0.493992	1e-5	1e-5	1e-5	1e-5	1e-5	0.344299	1e-5	FALSE
I	1136414	1150297	QG536	BRC20263	1	146	12	7	13883	#CC1700	59985814	FALSE	NIC2	TRUE	276	8864226	15037759	0.5894645605106452	0	6652962	0.44241711813575413	TRUE	0.493992	D	0.142338	1e-5	0.019301	0.493992	1e-5	1e-5	1e-5	1e-5	1e-5	0.344299	1e-5	FALSE
I	1150297	1175482	ED3048	BRC20263	0.9	146	13	4	25185	#CC0B00	150684368	FALSE	NIC2	TRUE	276	8864226	15037759	0.5894645605106452	0	6652962	0.44241711813575413	TRUE	0.493992	D	0.142338	1e-5	0.019301	0.493992	1e-5	1e-5	1e-5	1e-5	1e-5	0.344299	1e-5	FALSE
I	1175482	1182670	QG536	BRC20263	1	146	14	7	7188	#CC1700	59985814	FALSE	NIC2	TRUE	276	8864226	15037759	0.5894645605106452	0	6652962	0.44241711813575413	TRUE	0.493992	D	0.142338	1e-5	0.019301	0.493992	1e-5	1e-5	1e-5	1e-5	1e-5	0.344299	1e-5	FALSE
I	1182670	1190482	ED3048	BRC20263	0.9	146	15	4	7812	#CC0B00	150684368	FALSE	NIC2	TRUE	276	8864226	15037759	0.5894645605106452	0	6652962	0.44241711813575413	TRUE	0.493992	D	0.142338	1e-5	0.019301	0.493992	1e-5	1e-5	1e-5	1e-5	1e-5	0.344299	1e-5	FALSE
I	1190482	1242553	NIC2	BRC20263	1	146	16	1	52071	#CC0000	2453905988	TRUE	NIC2	TRUE	276	8864226	15037759	0.5894645605106452	0	6652962	0.44241711813575413	TRUE	0.493992	D	0.142338	1e-5	0.019301	0.493992	1e-5	1e-5	1e-5	1e-5	1e-5	0.344299	1e-5	FALSE
I	1242553	1344494	ED3048	BRC20263	0.9	146	17	4	101941	#CC0B00	150684368	FALSE	NIC2	TRUE	276	8864226	15037759	0.5894645605106452	0	6652962	0.44241711813575413	TRUE	0.493992	D	0.142338	1e-5	0.019301	0.493992	1e-5	1e-5	1e-5	1e-5	1e-5	0.344299	1e-5	FALSE
I	1344494	1420764	NIC2	BRC20263	1	146	18	1	76270	#CC0000	2453905988	TRUE	NIC2	TRUE	276	8864226	15037759	0.5894645605106452	0	6652962	0.44241711813575413	TRUE	0.493992	D	0.142338	1e-5	0.019301	0.493992	1e-5	1e-5	1e-5	1e-5	1e-5	0.344299	1e-5	FALSE
I	1420764	1443616	ED3048	BRC20263	0.9	146	19	4	22852	#CC0B00	150684368	FALSE	NIC2	TRUE	276	8864226	15037759	0.5894645605106452	0	6652962	0.44241711813575413	TRUE	0.493992	D	0.142338	1e-5	0.019301	0.493992	1e-5	1e-5	1e-5	1e-5	1e-5	0.344299	1e-5	FALSE
I	1443616	1454609	QG536	BRC20263	1	146	20	7	10993	#CC1700	59985814	FALSE	NIC2	TRUE	276	8864226	15037759	0.5894645605106452	0	6652962	0.44241711813575413	TRUE	0.493992	D	0.142338	1e-5	0.019301	0.493992	1e-5	1e-5	1e-5	1e-5	1e-5	0.344299	1e-5	FALSE
I	1454609	1463349	NIC2	BRC20263	1	146	21	1	8740	#CC0000	2453905988	TRUE	NIC2	TRUE	276	8864226	15037759	0.5894645605106452	0	6652962	0.44241711813575413	TRUE	0.493992	D	0.142338	1e-5	0.019301	0.493992	1e-5	1e-5	1e-5	1e-5	1e-5	0.344299	1e-5	FALSE
I	1463349	1486678	QG536	BRC20263	1	146	22	7	23329	#CC1700	59985814	FALSE	NIC2	TRUE	276	8864226	15037759	0.5894645605106452	0	6652962	0.44241711813575413	TRUE	0.493992	D	0.142338	1e-5	0.019301	0.493992	1e-5	1e-5	1e-5	1e-5	1e-5	0.344299	1e-5	FALSE
I	1486678	1610423	NIC2	BRC20263	1	146	23	1	123745	#CC0000	2453905988	TRUE	NIC2	TRUE	276	8864226	15037759	0.5894645605106452	0	6652962	0.44241711813575413	TRUE	0.493992	D	0.142338	1e-5	0.019301	0.493992	1e-5	1e-5	1e-5	1e-5	1e-5	0.344299	1e-5	FALSE
I	1610423	1640212	ED3048	BRC20263	0.9	146	24	4	29789	#CC0B00	150684368	FALSE	NIC2	TRUE	276	8864226	15037759	0.5894645605106452	0	6652962	0.44241711813575413	TRUE	0.493992	D	0.142338	1e-5	0.019301	0.493992	1e-5	1e-5	1e-5	1e-5	1e-5	0.344299	1e-5	FALSE
I	1640212	1660874	NIC2	BRC20263	1	146	25	1	20662	#CC0000	2453905988	TRUE	NIC2	TRUE	276	8864226	15037759	0.5894645605106452	0	6652962	0.44241711813575413	TRUE	0.493992	D	0.142338	1e-5	0.019301	0.493992	1e-5	1e-5	1e-5	1e-5	1e-5	0.344299	1e-5	FALSE
I	1660874	1750821	ED3048	BRC20263	0.9	146	26	4	89947	#CC0B00	150684368	FALSE	NIC2	TRUE	276	8864226	15037759	0.5894645605106452	0	6652962	0.44241711813575413	TRUE	0.493992	D	0.142338	1e-5	0.019301	0.493992	1e-5	1e-5	1e-5	1e-5	1e-5	0.344299	1e-5	FALSE
I	1750821	1781567	NIC2	BRC20263	1	146	27	1	30746	#CC0000	2453905988	TRUE	NIC2	TRUE	276	8864226	15037759	0.5894645605106452	0	6652962	0.44241711813575413	TRUE	0.493992	D	0.142338	1e-5	0.019301	0.493992	1e-5	1e-5	1e-5	1e-5	1e-5	0.344299	1e-5	FALSE
I	1781567	1825779	ED3048	BRC20263	0.9	146	28	4	44212	#CC0B00	150684368	FALSE	NIC2	TRUE	276	8864226	15037759	0.5894645605106452	0	6652962	0.44241711813575413	TRUE	0.493992	D	0.142338	1e-5	0.019301	0.493992	1e-5	1e-5	1e-5	1e-5	1e-5	0.344299	1e-5	FALSE
I	1825779	1829697	NIC2	BRC20263	1	146	29	1	3918	#CC0000	2453905988	TRUE	NIC2	TRUE	276	8864226	15037759	0.5894645605106452	0	6652962	0.44241711813575413	TRUE	0.493992	D	0.142338	1e-5	0.019301	0.493992	1e-5	1e-5	1e-5	1e-5	1e-5	0.344299	1e-5	FALSE
I	1829697	1851727	ED3048	BRC20263	0.9	146	30	4	22030	#CC0B00	150684368	FALSE	NIC2	TRUE	276	8864226	15037759	0.5894645605106452	0	6652962	0.44241711813575413	TRUE	0.493992	D	0.142338	1e-5	0.019301	0.493992	1e-5	1e-5	1e-5	1e-5	1e-5	0.344299	1e-5	FALSE
I	1851727	1874368	NIC2	BRC20263	1	146	31	1	22641	#CC0000	2453905988	TRUE	NIC2	TRUE	276	8864226	15037759	0.5894645605106452	0	6652962	0.44241711813575413	TRUE	0.493992	D	0.142338	1e-5	0.019301	0.493992	1e-5	1e-5	1e-5	1e-5	1e-5	0.344299	1e-5	FALSE
I	1874368	1881920	ED3048	BRC20263	0.9	146	32	4	7552	#CC0B00	150684368	FALSE	NIC2	TRUE	276	8864226	15037759	0.5894645605106452	0	6652962	0.44241711813575413	TRUE	0.493992	D	0.142338	1e-5	0.019301	0.493992	1e-5	1e-5	1e-5	1e-5	1e-5	0.344299	1e-5	FALSE
I	1881920	1913957	NIC2	BRC20263	1	146	33	1	32037	#CC0000	2453905988	TRUE	NIC2	TRUE	276	8864226	15037759	0.5894645605106452	0	6652962	0.44241711813575413	TRUE	0.493992	D	0.142338	1e-5	0.019301	0.493992	1e-5	1e-5	1e-5	1e-5	1e-5	0.344299	1e-5	FALSE
I	1913957	1922747	ED3048	BRC20263	0.9	146	34	4	8790	#CC0B00	150684368	FALSE	NIC2	TRUE	276	8864226	15037759	0.5894645605106452	0	6652962	0.44241711813575413	TRUE	0.493992	D	0.142338	1e-5	0.019301	0.493992	1e-5	1e-5	1e-5	1e-5	1e-5	0.344299	1e-5	FALSE
I	1922747	1974234	NIC2	BRC20263	1	146	35	1	51487	#CC0000	2453905988	TRUE	NIC2	TRUE	276	8864226	15037759	0.5894645605106452	0	6652962	0.44241711813575413	TRUE	0.493992	D	0.142338	1e-5	0.019301	0.493992	1e-5	1e-5	1e-5	1e-5	1e-5	0.344299	1e-5	FALSE
I	1974234	1981352	ED3048	BRC20263	0.9	146	36	4	7118	#CC0B00	150684368	FALSE	NIC2	TRUE	276	8864226	15037759	0.5894645605106452	0	6652962	0.44241711813575413	TRUE	0.493992	D	0.142338	1e-5	0.019301	0.493992	1e-5	1e-5	1e-5	1e-5	1e-5	0.344299	1e-5	FALSE
I	1981352	2040543	NIC2	BRC20263	1	146	37	1	59191	#CC0000	2453905988	TRUE	NIC2	TRUE	276	8864226	15037759	0.5894645605106452	0	6652962	0.44241711813575413	TRUE	0.493992	D	0.142338	1e-5	0.019301	0.493992	1e-5	1e-5	1e-5	1e-5	1e-5	0.344299	1e-5	FALSE
I	2040543	2161780	ED3048	BRC20263	0.9	146	38	4	121237	#CC0B00	150684368	FALSE	NIC2	TRUE	276	8864226	15037759	0.5894645605106452	0	6652962	0.44241711813575413	TRUE	0.493992	D	0.142338	1e-5	0.019301	0.493992	1e-5	1e-5	1e-5	1e-5	1e-5	0.344299	1e-5	FALSE
I	2161780	2176348	NIC2	BRC20263	1	146	39	1	14568	#CC0000	2453905988	TRUE	NIC2	TRUE	276	8864226	15037759	0.5894645605106452	0	6652962	0.44241711813575413	TRUE	0.493992	D	0.142338	1e-5	0.019301	0.493992	1e-5	1e-5	1e-5	1e-5	1e-5	0.344299	1e-5	FALSE
I	2176348	2190339	ED3048	BRC20263	0.9	146	40	4	13991	#CC0B00	150684368	FALSE	NIC2	TRUE	276	8864226	15037759	0.5894645605106452	0	6652962	0.44241711813575413	TRUE	0.493992	D	0.142338	1e-5	0.019301	0.493992	1e-5	1e-5	1e-5	1e-5	1e-5	0.344299	1e-5	FALSE
I	2190339	2204010	NIC2	BRC20263	1	146	41	1	13671	#CC0000	2453905988	TRUE	NIC2	TRUE	276	8864226	15037759	0.5894645605106452	0	6652962	0.44241711813575413	TRUE	0.493992	D	0.142338	1e-5	0.019301	0.493992	1e-5	1e-5	1e-5	1e-5	1e-5	0.344299	1e-5	FALSE
I	2204010	2465076	ED3048	BRC20263	0.9	146	42	4	261066	#CC0B00	150684368	FALSE	NIC2	TRUE	276	8864226	15037759	0.5894645605106452	0	6652962	0.44241711813575413	TRUE	0.493992	D	0.142338	1e-5	0.019301	0.493992	1e-5	1e-5	1e-5	1e-5	1e-5	0.344299	1e-5	FALSE
I	2465076	2468912	NIC2	BRC20263	1	146	43	1	3836	#CC0000	2453905988	TRUE	NIC2	TRUE	276	8864226	15037759	0.5894645605106452	0	6652962	0.44241711813575413	TRUE	0.493992	D	0.142338	1e-5	0.019301	0.493992	1e-5	1e-5	1e-5	1e-5	1e-5	0.344299	1e-5	FALSE
I	2468912	2500102	ED3048	BRC20263	0.9	146	44	4	31190	#CC0B00	150684368	FALSE	NIC2	TRUE	276	8864226	15037759	0.5894645605106452	0	6652962	0.44241711813575413	TRUE	0.493992	D	0.142338	1e-5	0.019301	0.493992	1e-5	1e-5	1e-5	1e-5	1e-5	0.344299	1e-5	FALSE
I	2500102	2513751	NIC2	BRC20263	1	146	45	1	13649	#CC0000	2453905988	TRUE	NIC2	TRUE	276	8864226	15037759	0.5894645605106452	0	6652962	0.44241711813575413	TRUE	0.493992	D	0.142338	1e-5	0.019301	0.493992	1e-5	1e-5	1e-5	1e-5	1e-5	0.344299	1e-5	FALSE
I	2513751	2576070	ED3048	BRC20263	0.9	146	46	4	62319	#CC0B00	150684368	FALSE	NIC2	TRUE	276	8864226	15037759	0.5894645605106452	0	6652962	0.44241711813575413	TRUE	0.493992	D	0.142338	1e-5	0.019301	0.493992	1e-5	1e-5	1e-5	1e-5	1e-5	0.344299	1e-5	FALSE
I	2576070	2785019	NIC2	BRC20263	1	146	47	1	208949	#CC0000	2453905988	TRUE	NIC2	TRUE	276	8864226	15037759	0.5894645605106452	0	6652962	0.44241711813575413	TRUE	0.493992	D	0.142338	1e-5	0.019301	0.493992	1e-5	1e-5	1e-5	1e-5	1e-5	0.344299	1e-5	FALSE
I	2785019	2864069	ED3048	BRC20263	0.9	146	48	4	79050	#CC0B00	150684368	FALSE	NIC2	TRUE	276	8864226	15037759	0.5894645605106452	0	6652962	0.44241711813575413	TRUE	0.493992	D	0.142338	1e-5	0.019301	0.493992	1e-5	1e-5	1e-5	1e-5	1e-5	0.344299	1e-5	FALSE
I	2864069	2866511	NIC2	BRC20263	1	146	49	1	2442	#CC0000	2453905988	TRUE	NIC2	TRUE	276	8864226	15037759	0.5894645605106452	0	6652962	0.44241711813575413	TRUE	0.493992	D	0.142338	1e-5	0.019301	0.493992	1e-5	1e-5	1e-5	1e-5	1e-5	0.344299	1e-5	FALSE
I	2866511	2867958	ED3048	BRC20263	0.9	146	50	4	1447	#CC0B00	150684368	FALSE	NIC2	TRUE	276	8864226	15037759	0.5894645605106452	0	6652962	0.44241711813575413	TRUE	0.493992	D	0.142338	1e-5	0.019301	0.493992	1e-5	1e-5	1e-5	1e-5	1e-5	0.344299	1e-5	FALSE
I	2867958	4977331	NIC2	BRC20263	1	146	51	1	2109373	#CC0000	2453905988	TRUE	NIC2	TRUE	276	8864226	15037759	0.5894645605106452	2109373	6652962	0.44241711813575413	TRUE	0.493992	D	0.142338	1e-5	0.019301	0.493992	1e-5	1e-5	1e-5	1e-5	1e-5	0.344299	1e-5	FALSE
I	4977331	6027607	MY2535	BRC20263	0.9	146	52	10	1050276	#CC2200	212766310	FALSE	NIC2	TRUE	276	8864226	15037759	0.5894645605106452	0	6652962	0.44241711813575413	TRUE	0.493992	D	0.142338	1e-5	0.019301	0.493992	1e-5	1e-5	1e-5	1e-5	1e-5	0.344299	1e-5	FALSE
I	6027607	6051212	NIC2	BRC20263	1	146	53	1	23605	#CC0000	2453905988	TRUE	NIC2	TRUE	276	8864226	15037759	0.5894645605106452	0	6652962	0.44241711813575413	TRUE	0.493992	D	0.142338	1e-5	0.019301	0.493992	1e-5	1e-5	1e-5	1e-5	1e-5	0.344299	1e-5	FALSE
I	6051212	6294577	MY2535	BRC20263	0.9	146	54	10	243365	#CC2200	212766310	FALSE	NIC2	TRUE	276	8864226	15037759	0.5894645605106452	0	6652962	0.44241711813575413	TRUE	0.493992	D	0.142338	1e-5	0.019301	0.493992	1e-5	1e-5	1e-5	1e-5	1e-5	0.344299	1e-5	FALSE
I	6294577	7659743	NIC2	BRC20263	1	146	55	1	1365166	#CC0000	2453905988	TRUE	NIC2	TRUE	276	8864226	15037759	0.5894645605106452	1365166	6652962	0.44241711813575413	TRUE	0.493992	D	0.142338	1e-5	0.019301	0.493992	1e-5	1e-5	1e-5	1e-5	1e-5	0.344299	1e-5	FALSE
I	7659743	8014079	MY2535	BRC20263	0.9	146	56	10	354336	#CC2200	212766310	FALSE	NIC2	TRUE	276	8864226	15037759	0.5894645605106452	0	6652962	0.44241711813575413	TRUE	0.493992	D	0.142338	1e-5	0.019301	0.493992	1e-5	1e-5	1e-5	1e-5	1e-5	0.344299	1e-5	FALSE
I	8014079	8039701	NIC2	BRC20263	1	146	57	1	25622	#CC0000	2453905988	TRUE	NIC2	TRUE	276	8864226	15037759	0.5894645605106452	0	6652962	0.44241711813575413	TRUE	0.493992	D	0.142338	1e-5	0.019301	0.493992	1e-5	1e-5	1e-5	1e-5	1e-5	0.344299	1e-5	FALSE
I	8039701	8583945	MY2535	BRC20263	0.9	146	58	10	544244	#CC2200	212766310	FALSE	NIC2	TRUE	276	8864226	15037759	0.5894645605106452	0	6652962	0.44241711813575413	TRUE	0.493992	D	0.142338	1e-5	0.019301	0.493992	1e-5	1e-5	1e-5	1e-5	1e-5	0.344299	1e-5	FALSE
I	8583945	9244655	NIC2	BRC20263	1	146	59	1	660710	#CC0000	2453905988	TRUE	NIC2	TRUE	276	8864226	15037759	0.5894645605106452	0	6652962	0.44241711813575413	TRUE	0.493992	D	0.142338	1e-5	0.019301	0.493992	1e-5	1e-5	1e-5	1e-5	1e-5	0.344299	1e-5	FALSE
I	9244655	9352778	MY2535	BRC20263	0.9	146	60	10	108123	#CC2200	212766310	FALSE	NIC2	TRUE	276	8864226	15037759	0.5894645605106452	0	6652962	0.44241711813575413	TRUE	0.493992	D	0.142338	1e-5	0.019301	0.493992	1e-5	1e-5	1e-5	1e-5	1e-5	0.344299	1e-5	FALSE
I	9352778	9750879	NIC2	BRC20263	1	146	61	1	398101	#CC0000	2453905988	TRUE	NIC2	TRUE	276	8864226	15037759	0.5894645605106452	0	6652962	0.44241711813575413	TRUE	0.493992	D	0.142338	1e-5	0.019301	0.493992	1e-5	1e-5	1e-5	1e-5	1e-5	0.344299	1e-5	FALSE
I	9750879	10041768	MY2535	BRC20263	0.9	146	62	10	290889	#CC2200	212766310	FALSE	NIC2	TRUE	276	8864226	15037759	0.5894645605106452	0	6652962	0.44241711813575413	TRUE	0.493992	D	0.142338	1e-5	0.019301	0.493992	1e-5	1e-5	1e-5	1e-5	1e-5	0.344299	1e-5	FALSE
I	10041768	10045947	NIC2	BRC20263	1	146	63	1	4179	#CC0000	2453905988	TRUE	NIC2	TRUE	276	8864226	15037759	0.5894645605106452	0	6652962	0.44241711813575413	TRUE	0.493992	D	0.142338	1e-5	0.019301	0.493992	1e-5	1e-5	1e-5	1e-5	1e-5	0.344299	1e-5	FALSE
I	10045947	10193215	MY2535	BRC20263	0.9	146	64	10	147268	#CC2200	212766310	FALSE	NIC2	TRUE	276	8864226	15037759	0.5894645605106452	0	6652962	0.44241711813575413	TRUE	0.493992	D	0.142338	1e-5	0.019301	0.493992	1e-5	1e-5	1e-5	1e-5	1e-5	0.344299	1e-5	FALSE
I	10193215	10351020	EG4347	BRC20263	1	146	65	5	157805	#FF1300	122541644	FALSE	NIC2	TRUE	276	8864226	15037759	0.5894645605106452	0	6652962	0.44241711813575413	TRUE	0.493992	D	0.142338	1e-5	0.019301	0.493992	1e-5	1e-5	1e-5	1e-5	1e-5	0.344299	1e-5	FALSE
I	10351020	10354853	NIC2	BRC20263	1	146	66	1	3833	#CC0000	2453905988	TRUE	NIC2	TRUE	276	8864226	15037759	0.5894645605106452	0	6652962	0.44241711813575413	TRUE	0.493992	D	0.142338	1e-5	0.019301	0.493992	1e-5	1e-5	1e-5	1e-5	1e-5	0.344299	1e-5	FALSE
I	10354853	10634911	EG4347	BRC20263	1	146	67	5	280058	#FF1300	122541644	FALSE	NIC2	TRUE	276	8864226	15037759	0.5894645605106452	0	6652962	0.44241711813575413	TRUE	0.493992	D	0.142338	1e-5	0.019301	0.493992	1e-5	1e-5	1e-5	1e-5	1e-5	0.344299	1e-5	FALSE
I	10634911	10639190	NIC2	BRC20263	1	146	68	1	4279	#CC0000	2453905988	TRUE	NIC2	TRUE	276	8864226	15037759	0.5894645605106452	0	6652962	0.44241711813575413	TRUE	0.493992	D	0.142338	1e-5	0.019301	0.493992	1e-5	1e-5	1e-5	1e-5	1e-5	0.344299	1e-5	FALSE
I	10639190	10733564	EG4347	BRC20263	1	146	69	5	94374	#FF1300	122541644	FALSE	NIC2	TRUE	276	8864226	15037759	0.5894645605106452	0	6652962	0.44241711813575413	TRUE	0.493992	D	0.142338	1e-5	0.019301	0.493992	1e-5	1e-5	1e-5	1e-5	1e-5	0.344299	1e-5	FALSE
I	10733564	10839040	MY2535	BRC20263	0.9	146	70	10	105476	#CC2200	212766310	FALSE	NIC2	TRUE	276	8864226	15037759	0.5894645605106452	0	6652962	0.44241711813575413	TRUE	0.493992	D	0.142338	1e-5	0.019301	0.493992	1e-5	1e-5	1e-5	1e-5	1e-5	0.344299	1e-5	FALSE
I	10839040	10840752	NIC2	BRC20263	1	146	71	1	1712	#CC0000	2453905988	TRUE	NIC2	TRUE	276	8864226	15037759	0.5894645605106452	0	6652962	0.44241711813575413	TRUE	0.493992	D	0.142338	1e-5	0.019301	0.493992	1e-5	1e-5	1e-5	1e-5	1e-5	0.344299	1e-5	FALSE
I	10840752	10846016	MY2535	BRC20263	0.9	146	72	10	5264	#CC2200	212766310	FALSE	NIC2	TRUE	276	8864226	15037759	0.5894645605106452	0	6652962	0.44241711813575413	TRUE	0.493992	D	0.142338	1e-5	0.019301	0.493992	1e-5	1e-5	1e-5	1e-5	1e-5	0.344299	1e-5	FALSE
I	10846016	10883065	EG4347	BRC20263	1	146	73	5	37049	#FF1300	122541644	FALSE	NIC2	TRUE	276	8864226	15037759	0.5894645605106452	0	6652962	0.44241711813575413	TRUE	0.493992	D	0.142338	1e-5	0.019301	0.493992	1e-5	1e-5	1e-5	1e-5	1e-5	0.344299	1e-5	FALSE
I	10883065	10908578	NIC2	BRC20263	1	146	74	1	25513	#CC0000	2453905988	TRUE	NIC2	TRUE	276	8864226	15037759	0.5894645605106452	0	6652962	0.44241711813575413	TRUE	0.493992	D	0.142338	1e-5	0.019301	0.493992	1e-5	1e-5	1e-5	1e-5	1e-5	0.344299	1e-5	FALSE
I	10908578	11031805	EG4347	BRC20263	1	146	75	5	123227	#FF1300	122541644	FALSE	NIC2	TRUE	276	8864226	15037759	0.5894645605106452	0	6652962	0.44241711813575413	TRUE	0.493992	D	0.142338	1e-5	0.019301	0.493992	1e-5	1e-5	1e-5	1e-5	1e-5	0.344299	1e-5	FALSE
I	11031805	11270976	MY2535	BRC20263	0.9	146	76	10	239171	#CC2200	212766310	FALSE	NIC2	TRUE	276	8864226	15037759	0.5894645605106452	0	6652962	0.44241711813575413	TRUE	0.493992	D	0.142338	1e-5	0.019301	0.493992	1e-5	1e-5	1e-5	1e-5	1e-5	0.344299	1e-5	FALSE
I	11270976	11271410	NIC2	BRC20263	1	146	77	1	434	#CC0000	2453905988	TRUE	NIC2	TRUE	276	8864226	15037759	0.5894645605106452	0	6652962	0.44241711813575413	TRUE	0.493992	D	0.142338	1e-5	0.019301	0.493992	1e-5	1e-5	1e-5	1e-5	1e-5	0.344299	1e-5	FALSE
I	11271410	11289130	MY2535	BRC20263	0.9	146	78	10	17720	#CC2200	212766310	FALSE	NIC2	TRUE	276	8864226	15037759	0.5894645605106452	0	6652962	0.44241711813575413	TRUE	0.493992	D	0.142338	1e-5	0.019301	0.493992	1e-5	1e-5	1e-5	1e-5	1e-5	0.344299	1e-5	FALSE
I	11289130	11333583	NIC2	BRC20263	1	146	79	1	44453	#CC0000	2453905988	TRUE	NIC2	TRUE	276	8864226	15037759	0.5894645605106452	0	6652962	0.44241711813575413	TRUE	0.493992	D	0.142338	1e-5	0.019301	0.493992	1e-5	1e-5	1e-5	1e-5	1e-5	0.344299	1e-5	FALSE
I	11333583	11370546	MY2535	BRC20263	0.9	146	80	10	36963	#CC2200	212766310	FALSE	NIC2	TRUE	276	8864226	15037759	0.5894645605106452	0	6652962	0.44241711813575413	TRUE	0.493992	D	0.142338	1e-5	0.019301	0.493992	1e-5	1e-5	1e-5	1e-5	1e-5	0.344299	1e-5	FALSE
I	11370546	11460051	NIC2	BRC20263	1	146	81	1	89505	#CC0000	2453905988	TRUE	NIC2	TRUE	276	8864226	15037759	0.5894645605106452	0	6652962	0.44241711813575413	TRUE	0.493992	D	0.142338	1e-5	0.019301	0.493992	1e-5	1e-5	1e-5	1e-5	1e-5	0.344299	1e-5	FALSE
I	11460051	11484503	EG4347	BRC20263	1	146	82	5	24452	#FF1300	122541644	FALSE	NIC2	TRUE	276	8864226	15037759	0.5894645605106452	0	6652962	0.44241711813575413	TRUE	0.493992	D	0.142338	1e-5	0.019301	0.493992	1e-5	1e-5	1e-5	1e-5	1e-5	0.344299	1e-5	FALSE
I	11484503	11511424	MY2535	BRC20263	0.9	146	83	10	26921	#CC2200	212766310	FALSE	NIC2	TRUE	276	8864226	15037759	0.5894645605106452	0	6652962	0.44241711813575413	TRUE	0.493992	D	0.142338	1e-5	0.019301	0.493992	1e-5	1e-5	1e-5	1e-5	1e-5	0.344299	1e-5	FALSE
I	11511424	11582269	NIC2	BRC20263	1	146	84	1	70845	#CC0000	2453905988	TRUE	NIC2	TRUE	276	8864226	15037759	0.5894645605106452	0	6652962	0.44241711813575413	TRUE	0.493992	D	0.142338	1e-5	0.019301	0.493992	1e-5	1e-5	1e-5	1e-5	1e-5	0.344299	1e-5	FALSE
I	11582269	11683469	MY2535	BRC20263	0.9	146	85	10	101200	#CC2200	212766310	FALSE	NIC2	TRUE	276	8864226	15037759	0.5894645605106452	0	6652962	0.44241711813575413	TRUE	0.493992	D	0.142338	1e-5	0.019301	0.493992	1e-5	1e-5	1e-5	1e-5	1e-5	0.344299	1e-5	FALSE
I	11683469	11696737	NIC2	BRC20263	1	146	86	1	13268	#CC0000	2453905988	TRUE	NIC2	TRUE	276	8864226	15037759	0.5894645605106452	0	6652962	0.44241711813575413	TRUE	0.493992	D	0.142338	1e-5	0.019301	0.493992	1e-5	1e-5	1e-5	1e-5	1e-5	0.344299	1e-5	FALSE
I	11696737	11789824	MY2535	BRC20263	0.9	146	87	10	93087	#CC2200	212766310	FALSE	NIC2	TRUE	276	8864226	15037759	0.5894645605106452	0	6652962	0.44241711813575413	TRUE	0.493992	D	0.142338	1e-5	0.019301	0.493992	1e-5	1e-5	1e-5	1e-5	1e-5	0.344299	1e-5	FALSE
I	11789824	11798829	NIC2	BRC20263	1	146	88	1	9005	#CC0000	2453905988	TRUE	NIC2	TRUE	276	8864226	15037759	0.5894645605106452	0	6652962	0.44241711813575413	TRUE	0.493992	D	0.142338	1e-5	0.019301	0.493992	1e-5	1e-5	1e-5	1e-5	1e-5	0.344299	1e-5	FALSE
I	11798829	11862999	MY2535	BRC20263	0.9	146	89	10	64170	#CC2200	212766310	FALSE	NIC2	TRUE	276	8864226	15037759	0.5894645605106452	0	6652962	0.44241711813575413	TRUE	0.493992	D	0.142338	1e-5	0.019301	0.493992	1e-5	1e-5	1e-5	1e-5	1e-5	0.344299	1e-5	FALSE
I	11862999	15041422	NIC2	BRC20263	1	146	90	1	3178423	#CC0000	2453905988	TRUE	NIC2	TRUE	276	8864226	15037759	0.5894645605106452	3178423	6652962	0.44241711813575413	TRUE	0.493992	D	0.142338	1e-5	0.019301	0.493992	1e-5	1e-5	1e-5	1e-5	1e-5	0.344299	1e-5	FALSE
I	3663	15041422	NIC2	CB4851	1	164	1	1	15037759	#CC0000	2453905988	TRUE	NIC2	TRUE	276	15037759	15037759	1	15037759	15037759	1	TRUE	0.9999	B	1e-5	0.9999	1e-5	1e-5	1e-5	1e-5	1e-5	1e-5	1e-5	1e-5	1e-5	FALSE
I	3663	2785019	NIC2	CB4852	1	18	1	1	2781356	#CC0000	2453905988	TRUE	NIC2	TRUE	276	14957262	15037759	0.9946470082410551	2781356	14954820	0.9944846170230551	TRUE	0.792139	D	1e-5	0.207768	1e-5	0.792139	1.3e-5	1e-5	1e-5	1e-5	1e-5	1e-5	1e-5	FALSE
I	2785019	2864069	ED3048	CB4852	0.9	18	2	4	79050	#CC0B00	150684368	FALSE	NIC2	TRUE	276	14957262	15037759	0.9946470082410551	0	14954820	0.9944846170230551	TRUE	0.792139	D	1e-5	0.207768	1e-5	0.792139	1.3e-5	1e-5	1e-5	1e-5	1e-5	1e-5	1e-5	FALSE
I	2864069	2866511	NIC2	CB4852	1	18	3	1	2442	#CC0000	2453905988	TRUE	NIC2	TRUE	276	14957262	15037759	0.9946470082410551	0	14954820	0.9944846170230551	TRUE	0.792139	D	1e-5	0.207768	1e-5	0.792139	1.3e-5	1e-5	1e-5	1e-5	1e-5	1e-5	1e-5	FALSE
I	2866511	2867958	ED3048	CB4852	0.9	18	4	4	1447	#CC0B00	150684368	FALSE	NIC2	TRUE	276	14957262	15037759	0.9946470082410551	0	14954820	0.9944846170230551	TRUE	0.792139	D	1e-5	0.207768	1e-5	0.792139	1.3e-5	1e-5	1e-5	1e-5	1e-5	1e-5	1e-5	FALSE
I	2867958	15041422	NIC2	CB4852	1	18	5	1	12173464	#CC0000	2453905988	TRUE	NIC2	TRUE	276	14957262	15037759	0.9946470082410551	12173464	14954820	0.9944846170230551	TRUE	0.792139	D	1e-5	0.207768	1e-5	0.792139	1.3e-5	1e-5	1e-5	1e-5	1e-5	1e-5	1e-5	FALSE
I	3663	448892	QG536	CB4853	1	89	1	7	445229	#CC1700	59985814	FALSE	NIC2	TRUE	276	11385773	15037759	0.7571455959628027	0	10472205	0.696393990620544	TRUE	0.692965	C	1e-5	1e-5	0.692965	0.306945	1e-5	1e-5	1e-5	1e-5	1e-5	1e-5	1e-5	FALSE
I	448892	528414	ED3048	CB4853	0.9	89	2	4	79522	#CC0B00	150684368	FALSE	NIC2	TRUE	276	11385773	15037759	0.7571455959628027	0	10472205	0.696393990620544	TRUE	0.692965	C	1e-5	1e-5	0.692965	0.306945	1e-5	1e-5	1e-5	1e-5	1e-5	1e-5	1e-5	FALSE
I	528414	835064	QG536	CB4853	1	89	3	7	306650	#CC1700	59985814	FALSE	NIC2	TRUE	276	11385773	15037759	0.7571455959628027	0	10472205	0.696393990620544	TRUE	0.692965	C	1e-5	1e-5	0.692965	0.306945	1e-5	1e-5	1e-5	1e-5	1e-5	1e-5	1e-5	FALSE
I	835064	843028	ED3048	CB4853	0.9	89	4	4	7964	#CC0B00	150684368	FALSE	NIC2	TRUE	276	11385773	15037759	0.7571455959628027	0	10472205	0.696393990620544	TRUE	0.692965	C	1e-5	1e-5	0.692965	0.306945	1e-5	1e-5	1e-5	1e-5	1e-5	1e-5	1e-5	FALSE
I	843028	844068	QG536	CB4853	1	89	5	7	1040	#CC1700	59985814	FALSE	NIC2	TRUE	276	11385773	15037759	0.7571455959628027	0	10472205	0.696393990620544	TRUE	0.692965	C	1e-5	1e-5	0.692965	0.306945	1e-5	1e-5	1e-5	1e-5	1e-5	1e-5	1e-5	FALSE
I	844068	864435	NIC2	CB4853	1	89	6	1	20367	#CC0000	2453905988	TRUE	NIC2	TRUE	276	11385773	15037759	0.7571455959628027	0	10472205	0.696393990620544	TRUE	0.692965	C	1e-5	1e-5	0.692965	0.306945	1e-5	1e-5	1e-5	1e-5	1e-5	1e-5	1e-5	FALSE
I	864435	1017980	QG536	CB4853	1	89	7	7	153545	#CC1700	59985814	FALSE	NIC2	TRUE	276	11385773	15037759	0.7571455959628027	0	10472205	0.696393990620544	TRUE	0.692965	C	1e-5	1e-5	0.692965	0.306945	1e-5	1e-5	1e-5	1e-5	1e-5	1e-5	1e-5	FALSE
I	1017980	1049837	NIC2	CB4853	1	89	8	1	31857	#CC0000	2453905988	TRUE	NIC2	TRUE	276	11385773	15037759	0.7571455959628027	0	10472205	0.696393990620544	TRUE	0.692965	C	1e-5	1e-5	0.692965	0.306945	1e-5	1e-5	1e-5	1e-5	1e-5	1e-5	1e-5	FALSE
I	1049837	1091061	QG536	CB4853	1	89	9	7	41224	#CC1700	59985814	FALSE	NIC2	TRUE	276	11385773	15037759	0.7571455959628027	0	10472205	0.696393990620544	TRUE	0.692965	C	1e-5	1e-5	0.692965	0.306945	1e-5	1e-5	1e-5	1e-5	1e-5	1e-5	1e-5	FALSE
I	1091061	1136414	NIC2	CB4853	1	89	10	1	45353	#CC0000	2453905988	TRUE	NIC2	TRUE	276	11385773	15037759	0.7571455959628027	0	10472205	0.696393990620544	TRUE	0.692965	C	1e-5	1e-5	0.692965	0.306945	1e-5	1e-5	1e-5	1e-5	1e-5	1e-5	1e-5	FALSE
I	1136414	1150297	QG536	CB4853	1	89	11	7	13883	#CC1700	59985814	FALSE	NIC2	TRUE	276	11385773	15037759	0.7571455959628027	0	10472205	0.696393990620544	TRUE	0.692965	C	1e-5	1e-5	0.692965	0.306945	1e-5	1e-5	1e-5	1e-5	1e-5	1e-5	1e-5	FALSE
I	1150297	1175482	ED3048	CB4853	0.9	89	12	4	25185	#CC0B00	150684368	FALSE	NIC2	TRUE	276	11385773	15037759	0.7571455959628027	0	10472205	0.696393990620544	TRUE	0.692965	C	1e-5	1e-5	0.692965	0.306945	1e-5	1e-5	1e-5	1e-5	1e-5	1e-5	1e-5	FALSE
I	1175482	1182670	QG536	CB4853	1	89	13	7	7188	#CC1700	59985814	FALSE	NIC2	TRUE	276	11385773	15037759	0.7571455959628027	0	10472205	0.696393990620544	TRUE	0.692965	C	1e-5	1e-5	0.692965	0.306945	1e-5	1e-5	1e-5	1e-5	1e-5	1e-5	1e-5	FALSE
I	1182670	1184463	ED3048	CB4853	0.9	89	14	4	1793	#CC0B00	150684368	FALSE	NIC2	TRUE	276	11385773	15037759	0.7571455959628027	0	10472205	0.696393990620544	TRUE	0.692965	C	1e-5	1e-5	0.692965	0.306945	1e-5	1e-5	1e-5	1e-5	1e-5	1e-5	1e-5	FALSE
I	1184463	1392843	CB4853	CB4853	1	89	15	89	208380	#5FFF00	416760	FALSE	NIC2	TRUE	276	11385773	15037759	0.7571455959628027	0	10472205	0.696393990620544	TRUE	0.692965	C	1e-5	1e-5	0.692965	0.306945	1e-5	1e-5	1e-5	1e-5	1e-5	1e-5	1e-5	FALSE
I	1392843	1420764	NIC2	CB4853	1	89	16	1	27921	#CC0000	2453905988	TRUE	NIC2	TRUE	276	11385773	15037759	0.7571455959628027	0	10472205	0.696393990620544	TRUE	0.692965	C	1e-5	1e-5	0.692965	0.306945	1e-5	1e-5	1e-5	1e-5	1e-5	1e-5	1e-5	FALSE
I	1420764	1443616	ED3048	CB4853	0.9	89	17	4	22852	#CC0B00	150684368	FALSE	NIC2	TRUE	276	11385773	15037759	0.7571455959628027	0	10472205	0.696393990620544	TRUE	0.692965	C	1e-5	1e-5	0.692965	0.306945	1e-5	1e-5	1e-5	1e-5	1e-5	1e-5	1e-5	FALSE
I	1443616	1454609	QG536	CB4853	1	89	18	7	10993	#CC1700	59985814	FALSE	NIC2	TRUE	276	11385773	15037759	0.7571455959628027	0	10472205	0.696393990620544	TRUE	0.692965	C	1e-5	1e-5	0.692965	0.306945	1e-5	1e-5	1e-5	1e-5	1e-5	1e-5	1e-5	FALSE
I	1454609	1463349	NIC2	CB4853	1	89	19	1	8740	#CC0000	2453905988	TRUE	NIC2	TRUE	276	11385773	15037759	0.7571455959628027	0	10472205	0.696393990620544	TRUE	0.692965	C	1e-5	1e-5	0.692965	0.306945	1e-5	1e-5	1e-5	1e-5	1e-5	1e-5	1e-5	FALSE
I	1463349	1486678	QG536	CB4853	1	89	20	7	23329	#CC1700	59985814	FALSE	NIC2	TRUE	276	11385773	15037759	0.7571455959628027	0	10472205	0.696393990620544	TRUE	0.692965	C	1e-5	1e-5	0.692965	0.306945	1e-5	1e-5	1e-5	1e-5	1e-5	1e-5	1e-5	FALSE
I	1486678	1610423	NIC2	CB4853	1	89	21	1	123745	#CC0000	2453905988	TRUE	NIC2	TRUE	276	11385773	15037759	0.7571455959628027	0	10472205	0.696393990620544	TRUE	0.692965	C	1e-5	1e-5	0.692965	0.306945	1e-5	1e-5	1e-5	1e-5	1e-5	1e-5	1e-5	FALSE
I	1610423	1640212	ED3048	CB4853	0.9	89	22	4	29789	#CC0B00	150684368	FALSE	NIC2	TRUE	276	11385773	15037759	0.7571455959628027	0	10472205	0.696393990620544	TRUE	0.692965	C	1e-5	1e-5	0.692965	0.306945	1e-5	1e-5	1e-5	1e-5	1e-5	1e-5	1e-5	FALSE
I	1640212	1660874	NIC2	CB4853	1	89	23	1	20662	#CC0000	2453905988	TRUE	NIC2	TRUE	276	11385773	15037759	0.7571455959628027	0	10472205	0.696393990620544	TRUE	0.692965	C	1e-5	1e-5	0.692965	0.306945	1e-5	1e-5	1e-5	1e-5	1e-5	1e-5	1e-5	FALSE
I	1660874	1750821	ED3048	CB4853	0.9	89	24	4	89947	#CC0B00	150684368	FALSE	NIC2	TRUE	276	11385773	15037759	0.7571455959628027	0	10472205	0.696393990620544	TRUE	0.692965	C	1e-5	1e-5	0.692965	0.306945	1e-5	1e-5	1e-5	1e-5	1e-5	1e-5	1e-5	FALSE
I	1750821	1781567	NIC2	CB4853	1	89	25	1	30746	#CC0000	2453905988	TRUE	NIC2	TRUE	276	11385773	15037759	0.7571455959628027	0	10472205	0.696393990620544	TRUE	0.692965	C	1e-5	1e-5	0.692965	0.306945	1e-5	1e-5	1e-5	1e-5	1e-5	1e-5	1e-5	FALSE
I	1781567	1825779	ED3048	CB4853	0.9	89	26	4	44212	#CC0B00	150684368	FALSE	NIC2	TRUE	276	11385773	15037759	0.7571455959628027	0	10472205	0.696393990620544	TRUE	0.692965	C	1e-5	1e-5	0.692965	0.306945	1e-5	1e-5	1e-5	1e-5	1e-5	1e-5	1e-5	FALSE
I	1825779	1829697	NIC2	CB4853	1	89	27	1	3918	#CC0000	2453905988	TRUE	NIC2	TRUE	276	11385773	15037759	0.7571455959628027	0	10472205	0.696393990620544	TRUE	0.692965	C	1e-5	1e-5	0.692965	0.306945	1e-5	1e-5	1e-5	1e-5	1e-5	1e-5	1e-5	FALSE
I	1829697	1851727	ED3048	CB4853	0.9	89	28	4	22030	#CC0B00	150684368	FALSE	NIC2	TRUE	276	11385773	15037759	0.7571455959628027	0	10472205	0.696393990620544	TRUE	0.692965	C	1e-5	1e-5	0.692965	0.306945	1e-5	1e-5	1e-5	1e-5	1e-5	1e-5	1e-5	FALSE
I	1851727	1874368	NIC2	CB4853	1	89	29	1	22641	#CC0000	2453905988	TRUE	NIC2	TRUE	276	11385773	15037759	0.7571455959628027	0	10472205	0.696393990620544	TRUE	0.692965	C	1e-5	1e-5	0.692965	0.306945	1e-5	1e-5	1e-5	1e-5	1e-5	1e-5	1e-5	FALSE
I	1874368	1881920	ED3048	CB4853	0.9	89	30	4	7552	#CC0B00	150684368	FALSE	NIC2	TRUE	276	11385773	15037759	0.7571455959628027	0	10472205	0.696393990620544	TRUE	0.692965	C	1e-5	1e-5	0.692965	0.306945	1e-5	1e-5	1e-5	1e-5	1e-5	1e-5	1e-5	FALSE
I	1881920	1913957	NIC2	CB4853	1	89	31	1	32037	#CC0000	2453905988	TRUE	NIC2	TRUE	276	11385773	15037759	0.7571455959628027	0	10472205	0.696393990620544	TRUE	0.692965	C	1e-5	1e-5	0.692965	0.306945	1e-5	1e-5	1e-5	1e-5	1e-5	1e-5	1e-5	FALSE
I	1913957	1922747	ED3048	CB4853	0.9	89	32	4	8790	#CC0B00	150684368	FALSE	NIC2	TRUE	276	11385773	15037759	0.7571455959628027	0	10472205	0.696393990620544	TRUE	0.692965	C	1e-5	1e-5	0.692965	0.306945	1e-5	1e-5	1e-5	1e-5	1e-5	1e-5	1e-5	FALSE
I	1922747	1974234	NIC2	CB4853	1	89	33	1	51487	#CC0000	2453905988	TRUE	NIC2	TRUE	276	11385773	15037759	0.7571455959628027	0	10472205	0.696393990620544	TRUE	0.692965	C	1e-5	1e-5	0.692965	0.306945	1e-5	1e-5	1e-5	1e-5	1e-5	1e-5	1e-5	FALSE
I	1974234	1981352	ED3048	CB4853	0.9	89	34	4	7118	#CC0B00	150684368	FALSE	NIC2	TRUE	276	11385773	15037759	0.7571455959628027	0	10472205	0.696393990620544	TRUE	0.692965	C	1e-5	1e-5	0.692965	0.306945	1e-5	1e-5	1e-5	1e-5	1e-5	1e-5	1e-5	FALSE
I	1981352	2040543	NIC2	CB4853	1	89	35	1	59191	#CC0000	2453905988	TRUE	NIC2	TRUE	276	11385773	15037759	0.7571455959628027	0	10472205	0.696393990620544	TRUE	0.692965	C	1e-5	1e-5	0.692965	0.306945	1e-5	1e-5	1e-5	1e-5	1e-5	1e-5	1e-5	FALSE
I	2040543	2161780	ED3048	CB4853	0.9	89	36	4	121237	#CC0B00	150684368	FALSE	NIC2	TRUE	276	11385773	15037759	0.7571455959628027	0	10472205	0.696393990620544	TRUE	0.692965	C	1e-5	1e-5	0.692965	0.306945	1e-5	1e-5	1e-5	1e-5	1e-5	1e-5	1e-5	FALSE
I	2161780	2176348	NIC2	CB4853	1	89	37	1	14568	#CC0000	2453905988	TRUE	NIC2	TRUE	276	11385773	15037759	0.7571455959628027	0	10472205	0.696393990620544	TRUE	0.692965	C	1e-5	1e-5	0.692965	0.306945	1e-5	1e-5	1e-5	1e-5	1e-5	1e-5	1e-5	FALSE
I	2176348	2190339	ED3048	CB4853	0.9	89	38	4	13991	#CC0B00	150684368	FALSE	NIC2	TRUE	276	11385773	15037759	0.7571455959628027	0	10472205	0.696393990620544	TRUE	0.692965	C	1e-5	1e-5	0.692965	0.306945	1e-5	1e-5	1e-5	1e-5	1e-5	1e-5	1e-5	FALSE
I	2190339	2204010	NIC2	CB4853	1	89	39	1	13671	#CC0000	2453905988	TRUE	NIC2	TRUE	276	11385773	15037759	0.7571455959628027	0	10472205	0.696393990620544	TRUE	0.692965	C	1e-5	1e-5	0.692965	0.306945	1e-5	1e-5	1e-5	1e-5	1e-5	1e-5	1e-5	FALSE
I	2204010	2465076	ED3048	CB4853	0.9	89	40	4	261066	#CC0B00	150684368	FALSE	NIC2	TRUE	276	11385773	15037759	0.7571455959628027	0	10472205	0.696393990620544	TRUE	0.692965	C	1e-5	1e-5	0.692965	0.306945	1e-5	1e-5	1e-5	1e-5	1e-5	1e-5	1e-5	FALSE
I	2465076	2468912	NIC2	CB4853	1	89	41	1	3836	#CC0000	2453905988	TRUE	NIC2	TRUE	276	11385773	15037759	0.7571455959628027	0	10472205	0.696393990620544	TRUE	0.692965	C	1e-5	1e-5	0.692965	0.306945	1e-5	1e-5	1e-5	1e-5	1e-5	1e-5	1e-5	FALSE
I	2468912	2500102	ED3048	CB4853	0.9	89	42	4	31190	#CC0B00	150684368	FALSE	NIC2	TRUE	276	11385773	15037759	0.7571455959628027	0	10472205	0.696393990620544	TRUE	0.692965	C	1e-5	1e-5	0.692965	0.306945	1e-5	1e-5	1e-5	1e-5	1e-5	1e-5	1e-5	FALSE
I	2500102	2513751	NIC2	CB4853	1	89	43	1	13649	#CC0000	2453905988	TRUE	NIC2	TRUE	276	11385773	15037759	0.7571455959628027	0	10472205	0.696393990620544	TRUE	0.692965	C	1e-5	1e-5	0.692965	0.306945	1e-5	1e-5	1e-5	1e-5	1e-5	1e-5	1e-5	FALSE
I	2513751	2576070	ED3048	CB4853	0.9	89	44	4	62319	#CC0B00	150684368	FALSE	NIC2	TRUE	276	11385773	15037759	0.7571455959628027	0	10472205	0.696393990620544	TRUE	0.692965	C	1e-5	1e-5	0.692965	0.306945	1e-5	1e-5	1e-5	1e-5	1e-5	1e-5	1e-5	FALSE
I	2576070	2785019	NIC2	CB4853	1	89	45	1	208949	#CC0000	2453905988	TRUE	NIC2	TRUE	276	11385773	15037759	0.7571455959628027	0	10472205	0.696393990620544	TRUE	0.692965	C	1e-5	1e-5	0.692965	0.306945	1e-5	1e-5	1e-5	1e-5	1e-5	1e-5	1e-5	FALSE
I	2785019	2864069	ED3048	CB4853	0.9	89	46	4	79050	#CC0B00	150684368	FALSE	NIC2	TRUE	276	11385773	15037759	0.7571455959628027	0	10472205	0.696393990620544	TRUE	0.692965	C	1e-5	1e-5	0.692965	0.306945	1e-5	1e-5	1e-5	1e-5	1e-5	1e-5	1e-5	FALSE
I	2864069	2866511	NIC2	CB4853	1	89	47	1	2442	#CC0000	2453905988	TRUE	NIC2	TRUE	276	11385773	15037759	0.7571455959628027	0	10472205	0.696393990620544	TRUE	0.692965	C	1e-5	1e-5	0.692965	0.306945	1e-5	1e-5	1e-5	1e-5	1e-5	1e-5	1e-5	FALSE
I	2866511	2867958	ED3048	CB4853	0.9	89	48	4	1447	#CC0B00	150684368	FALSE	NIC2	TRUE	276	11385773	15037759	0.7571455959628027	0	10472205	0.696393990620544	TRUE	0.692965	C	1e-5	1e-5	0.692965	0.306945	1e-5	1e-5	1e-5	1e-5	1e-5	1e-5	1e-5	FALSE
I	2867958	2886099	NIC2	CB4853	1	89	49	1	18141	#CC0000	2453905988	TRUE	NIC2	TRUE	276	11385773	15037759	0.7571455959628027	0	10472205	0.696393990620544	TRUE	0.692965	C	1e-5	1e-5	0.692965	0.306945	1e-5	1e-5	1e-5	1e-5	1e-5	1e-5	1e-5	FALSE
I	2886099	2936666	EG4946	CB4853	1	89	50	19	50567	#CC4400	33166819	FALSE	NIC2	TRUE	276	11385773	15037759	0.7571455959628027	0	10472205	0.696393990620544	TRUE	0.692965	C	1e-5	1e-5	0.692965	0.306945	1e-5	1e-5	1e-5	1e-5	1e-5	1e-5	1e-5	FALSE
I	2936666	3018467	NIC2	CB4853	1	89	51	1	81801	#CC0000	2453905988	TRUE	NIC2	TRUE	276	11385773	15037759	0.7571455959628027	0	10472205	0.696393990620544	TRUE	0.692965	C	1e-5	1e-5	0.692965	0.306945	1e-5	1e-5	1e-5	1e-5	1e-5	1e-5	1e-5	FALSE
I	3018467	3046978	EG4946	CB4853	1	89	52	19	28511	#CC4400	33166819	FALSE	NIC2	TRUE	276	11385773	15037759	0.7571455959628027	0	10472205	0.696393990620544	TRUE	0.692965	C	1e-5	1e-5	0.692965	0.306945	1e-5	1e-5	1e-5	1e-5	1e-5	1e-5	1e-5	FALSE
I	3046978	3047977	NIC2	CB4853	1	89	53	1	999	#CC0000	2453905988	TRUE	NIC2	TRUE	276	11385773	15037759	0.7571455959628027	0	10472205	0.696393990620544	TRUE	0.692965	C	1e-5	1e-5	0.692965	0.306945	1e-5	1e-5	1e-5	1e-5	1e-5	1e-5	1e-5	FALSE
I	3047977	3064995	EG4946	CB4853	1	89	54	19	17018	#CC4400	33166819	FALSE	NIC2	TRUE	276	11385773	15037759	0.7571455959628027	0	10472205	0.696393990620544	TRUE	0.692965	C	1e-5	1e-5	0.692965	0.306945	1e-5	1e-5	1e-5	1e-5	1e-5	1e-5	1e-5	FALSE
I	3064995	3104790	NIC2	CB4853	1	89	55	1	39795	#CC0000	2453905988	TRUE	NIC2	TRUE	276	11385773	15037759	0.7571455959628027	0	10472205	0.696393990620544	TRUE	0.692965	C	1e-5	1e-5	0.692965	0.306945	1e-5	1e-5	1e-5	1e-5	1e-5	1e-5	1e-5	FALSE
I	3104790	3410583	EG4946	CB4853	1	89	56	19	305793	#CC4400	33166819	FALSE	NIC2	TRUE	276	11385773	15037759	0.7571455959628027	0	10472205	0.696393990620544	TRUE	0.692965	C	1e-5	1e-5	0.692965	0.306945	1e-5	1e-5	1e-5	1e-5	1e-5	1e-5	1e-5	FALSE
I	3410583	3421647	NIC2	CB4853	1	89	57	1	11064	#CC0000	2453905988	TRUE	NIC2	TRUE	276	11385773	15037759	0.7571455959628027	0	10472205	0.696393990620544	TRUE	0.692965	C	1e-5	1e-5	0.692965	0.306945	1e-5	1e-5	1e-5	1e-5	1e-5	1e-5	1e-5	FALSE
I	3421647	3559173	EG4946	CB4853	1	89	58	19	137526	#CC4400	33166819	FALSE	NIC2	TRUE	276	11385773	15037759	0.7571455959628027	0	10472205	0.696393990620544	TRUE	0.692965	C	1e-5	1e-5	0.692965	0.306945	1e-5	1e-5	1e-5	1e-5	1e-5	1e-5	1e-5	FALSE
I	3559173	3585161	NIC2	CB4853	1	89	59	1	25988	#CC0000	2453905988	TRUE	NIC2	TRUE	276	11385773	15037759	0.7571455959628027	0	10472205	0.696393990620544	TRUE	0.692965	C	1e-5	1e-5	0.692965	0.306945	1e-5	1e-5	1e-5	1e-5	1e-5	1e-5	1e-5	FALSE
I	3585161	4360210	EG4946	CB4853	1	89	60	19	775049	#CC4400	33166819	FALSE	NIC2	TRUE	276	11385773	15037759	0.7571455959628027	0	10472205	0.696393990620544	TRUE	0.692965	C	1e-5	1e-5	0.692965	0.306945	1e-5	1e-5	1e-5	1e-5	1e-5	1e-5	1e-5	FALSE
I	4360210	14832415	NIC2	CB4853	1	89	61	1	10472205	#CC0000	2453905988	TRUE	NIC2	TRUE	276	11385773	15037759	0.7571455959628027	10472205	10472205	0.696393990620544	TRUE	0.692965	C	1e-5	1e-5	0.692965	0.306945	1e-5	1e-5	1e-5	1e-5	1e-5	1e-5	1e-5	FALSE
I	14832415	15041422	CX11271	CB4853	1	89	62	23	209007	#FF6800	5445413	FALSE	NIC2	TRUE	276	11385773	15037759	0.7571455959628027	0	10472205	0.696393990620544	TRUE	0.692965	C	1e-5	1e-5	0.692965	0.306945	1e-5	1e-5	1e-5	1e-5	1e-5	1e-5	1e-5	FALSE
I	3663	448892	QG536	CB4854	1	96	1	7	445229	#CC1700	59985814	FALSE	NIC2	TRUE	276	10944883	15037759	0.7278267326933487	0	10026706	0.6667686322144144	TRUE	0.533478	D	1e-5	1e-5	1e-5	0.533478	1e-5	1e-5	1e-5	1e-5	1e-5	0.466432	1e-5	FALSE
I	448892	528414	ED3048	CB4854	0.9	96	2	4	79522	#CC0B00	150684368	FALSE	NIC2	TRUE	276	10944883	15037759	0.7278267326933487	0	10026706	0.6667686322144144	TRUE	0.533478	D	1e-5	1e-5	1e-5	0.533478	1e-5	1e-5	1e-5	1e-5	1e-5	0.466432	1e-5	FALSE
I	528414	835064	QG536	CB4854	1	96	3	7	306650	#CC1700	59985814	FALSE	NIC2	TRUE	276	10944883	15037759	0.7278267326933487	0	10026706	0.6667686322144144	TRUE	0.533478	D	1e-5	1e-5	1e-5	0.533478	1e-5	1e-5	1e-5	1e-5	1e-5	0.466432	1e-5	FALSE
I	835064	874281	ED3048	CB4854	0.9	96	4	4	39217	#CC0B00	150684368	FALSE	NIC2	TRUE	276	10944883	15037759	0.7278267326933487	0	10026706	0.6667686322144144	TRUE	0.533478	D	1e-5	1e-5	1e-5	0.533478	1e-5	1e-5	1e-5	1e-5	1e-5	0.466432	1e-5	FALSE
I	874281	1011410	NIC515	CB4854	1	96	5	55	137129	#CCCC00	3080288	FALSE	NIC2	TRUE	276	10944883	15037759	0.7278267326933487	0	10026706	0.6667686322144144	TRUE	0.533478	D	1e-5	1e-5	1e-5	0.533478	1e-5	1e-5	1e-5	1e-5	1e-5	0.466432	1e-5	FALSE
I	1011410	1072715	JU2466	CB4854	1	96	6	9	61305	#FF7D66	20668088	FALSE	NIC2	TRUE	276	10944883	15037759	0.7278267326933487	0	10026706	0.6667686322144144	TRUE	0.533478	D	1e-5	1e-5	1e-5	0.533478	1e-5	1e-5	1e-5	1e-5	1e-5	0.466432	1e-5	FALSE
I	1072715	1182670	NIC275	CB4854	1	96	7	27	109955	#FFB066	13184509	FALSE	NIC2	TRUE	276	10944883	15037759	0.7278267326933487	0	10026706	0.6667686322144144	TRUE	0.533478	D	1e-5	1e-5	1e-5	0.533478	1e-5	1e-5	1e-5	1e-5	1e-5	0.466432	1e-5	FALSE
I	1182670	1190482	ED3048	CB4854	0.9	96	8	4	7812	#CC0B00	150684368	FALSE	NIC2	TRUE	276	10944883	15037759	0.7278267326933487	0	10026706	0.6667686322144144	TRUE	0.533478	D	1e-5	1e-5	1e-5	0.533478	1e-5	1e-5	1e-5	1e-5	1e-5	0.466432	1e-5	FALSE
I	1190482	1242553	NIC2	CB4854	1	96	9	1	52071	#CC0000	2453905988	TRUE	NIC2	TRUE	276	10944883	15037759	0.7278267326933487	0	10026706	0.6667686322144144	TRUE	0.533478	D	1e-5	1e-5	1e-5	0.533478	1e-5	1e-5	1e-5	1e-5	1e-5	0.466432	1e-5	FALSE
I	1242553	1251686	ED3048	CB4854	0.9	96	10	4	9133	#CC0B00	150684368	FALSE	NIC2	TRUE	276	10944883	15037759	0.7278267326933487	0	10026706	0.6667686322144144	TRUE	0.533478	D	1e-5	1e-5	1e-5	0.533478	1e-5	1e-5	1e-5	1e-5	1e-5	0.466432	1e-5	FALSE
I	1253383	1253651	CB4854	CB4854	0.9	96	12	96	268	#8BFF66	806120	FALSE	NIC2	TRUE	276	10944883	15037759	0.7278267326933487	0	10026706	0.6667686322144144	TRUE	0.533478	D	1e-5	1e-5	1e-5	0.533478	1e-5	1e-5	1e-5	1e-5	1e-5	0.466432	1e-5	FALSE
I	1317367	1320705	CB4854	CB4854	0.9	96	14	96	3338	#8BFF66	806120	FALSE	NIC2	TRUE	276	10944883	15037759	0.7278267326933487	0	10026706	0.6667686322144144	TRUE	0.533478	D	1e-5	1e-5	1e-5	0.533478	1e-5	1e-5	1e-5	1e-5	1e-5	0.466432	1e-5	FALSE
I	1333920	1337195	CB4854	CB4854	0.9	96	16	96	3275	#8BFF66	806120	FALSE	NIC2	TRUE	276	10944883	15037759	0.7278267326933487	0	10026706	0.6667686322144144	TRUE	0.533478	D	1e-5	1e-5	1e-5	0.533478	1e-5	1e-5	1e-5	1e-5	1e-5	0.466432	1e-5	FALSE
I	1339859	1339879	CB4854	CB4854	0.9	96	18	96	20	#8BFF66	806120	FALSE	NIC2	TRUE	276	10944883	15037759	0.7278267326933487	0	10026706	0.6667686322144144	TRUE	0.533478	D	1e-5	1e-5	1e-5	0.533478	1e-5	1e-5	1e-5	1e-5	1e-5	0.466432	1e-5	FALSE
I	1449290	1496138	CB4854	CB4854	0.9	96	20	96	46848	#8BFF66	806120	FALSE	NIC2	TRUE	276	10944883	15037759	0.7278267326933487	0	10026706	0.6667686322144144	TRUE	0.533478	D	1e-5	1e-5	1e-5	0.533478	1e-5	1e-5	1e-5	1e-5	1e-5	0.466432	1e-5	FALSE
I	1496138	1712160	NIC2	CB4854	1	96	21	1	216022	#CC0000	2453905988	TRUE	NIC2	TRUE	276	10944883	15037759	0.7278267326933487	0	10026706	0.6667686322144144	TRUE	0.533478	D	1e-5	1e-5	1e-5	0.533478	1e-5	1e-5	1e-5	1e-5	1e-5	0.466432	1e-5	FALSE
I	1712160	1739250	CB4854	CB4854	0.9	96	22	96	27090	#8BFF66	806120	FALSE	NIC2	TRUE	276	10944883	15037759	0.7278267326933487	0	10026706	0.6667686322144144	TRUE	0.533478	D	1e-5	1e-5	1e-5	0.533478	1e-5	1e-5	1e-5	1e-5	1e-5	0.466432	1e-5	FALSE
I	1739250	1750904	MY920	CB4854	0.9	96	23	12	11654	#FF8566	22692122	FALSE	NIC2	TRUE	276	10944883	15037759	0.7278267326933487	0	10026706	0.6667686322144144	TRUE	0.533478	D	1e-5	1e-5	1e-5	0.533478	1e-5	1e-5	1e-5	1e-5	1e-5	0.466432	1e-5	FALSE
I	1750904	1760626	JU3127	CB4854	0.9	96	24	76	9722	#7DCC00	736408	FALSE	NIC2	TRUE	276	10944883	15037759	0.7278267326933487	0	10026706	0.6667686322144144	TRUE	0.533478	D	1e-5	1e-5	1e-5	0.533478	1e-5	1e-5	1e-5	1e-5	1e-5	0.466432	1e-5	FALSE
I	1760626	1799725	ED3073	CB4854	1	96	25	47	39099	#FFD900	13479239	FALSE	NIC2	TRUE	276	10944883	15037759	0.7278267326933487	0	10026706	0.6667686322144144	TRUE	0.533478	D	1e-5	1e-5	1e-5	0.533478	1e-5	1e-5	1e-5	1e-5	1e-5	0.466432	1e-5	FALSE
I	1799725	1801672	MY920	CB4854	0.9	96	26	12	1947	#FF8566	22692122	FALSE	NIC2	TRUE	276	10944883	15037759	0.7278267326933487	0	10026706	0.6667686322144144	TRUE	0.533478	D	1e-5	1e-5	1e-5	0.533478	1e-5	1e-5	1e-5	1e-5	1e-5	0.466432	1e-5	FALSE
I	1801672	1884001	JU3127	CB4854	0.9	96	27	76	82329	#7DCC00	736408	FALSE	NIC2	TRUE	276	10944883	15037759	0.7278267326933487	0	10026706	0.6667686322144144	TRUE	0.533478	D	1e-5	1e-5	1e-5	0.533478	1e-5	1e-5	1e-5	1e-5	1e-5	0.466432	1e-5	FALSE
I	1884001	1953281	NIC2	CB4854	1	96	28	1	69280	#CC0000	2453905988	TRUE	NIC2	TRUE	276	10944883	15037759	0.7278267326933487	0	10026706	0.6667686322144144	TRUE	0.533478	D	1e-5	1e-5	1e-5	0.533478	1e-5	1e-5	1e-5	1e-5	1e-5	0.466432	1e-5	FALSE
I	1973744	2041126	CB4854	CB4854	0.9	96	30	96	67382	#8BFF66	806120	FALSE	NIC2	TRUE	276	10944883	15037759	0.7278267326933487	0	10026706	0.6667686322144144	TRUE	0.533478	D	1e-5	1e-5	1e-5	0.533478	1e-5	1e-5	1e-5	1e-5	1e-5	0.466432	1e-5	FALSE
I	2042440	2079447	CB4854	CB4854	0.9	96	32	96	37007	#8BFF66	806120	FALSE	NIC2	TRUE	276	10944883	15037759	0.7278267326933487	0	10026706	0.6667686322144144	TRUE	0.533478	D	1e-5	1e-5	1e-5	0.533478	1e-5	1e-5	1e-5	1e-5	1e-5	0.466432	1e-5	FALSE
I	2152600	2182974	CB4854	CB4854	0.9	96	34	96	30374	#8BFF66	806120	FALSE	NIC2	TRUE	276	10944883	15037759	0.7278267326933487	0	10026706	0.6667686322144144	TRUE	0.533478	D	1e-5	1e-5	1e-5	0.533478	1e-5	1e-5	1e-5	1e-5	1e-5	0.466432	1e-5	FALSE
I	2317197	2374286	ED3073	CB4854	1	96	36	47	57089	#FFD900	13479239	FALSE	NIC2	TRUE	276	10944883	15037759	0.7278267326933487	0	10026706	0.6667686322144144	TRUE	0.533478	D	1e-5	1e-5	1e-5	0.533478	1e-5	1e-5	1e-5	1e-5	1e-5	0.466432	1e-5	FALSE
I	2374286	2381113	MY920	CB4854	0.9	96	37	12	6827	#FF8566	22692122	FALSE	NIC2	TRUE	276	10944883	15037759	0.7278267326933487	0	10026706	0.6667686322144144	TRUE	0.533478	D	1e-5	1e-5	1e-5	0.533478	1e-5	1e-5	1e-5	1e-5	1e-5	0.466432	1e-5	FALSE
I	2381113	2404696	QG536	CB4854	1	96	38	7	23583	#CC1700	59985814	FALSE	NIC2	TRUE	276	10944883	15037759	0.7278267326933487	0	10026706	0.6667686322144144	TRUE	0.533478	D	1e-5	1e-5	1e-5	0.533478	1e-5	1e-5	1e-5	1e-5	1e-5	0.466432	1e-5	FALSE
I	2404696	2417103	MY920	CB4854	0.9	96	39	12	12407	#FF8566	22692122	FALSE	NIC2	TRUE	276	10944883	15037759	0.7278267326933487	0	10026706	0.6667686322144144	TRUE	0.533478	D	1e-5	1e-5	1e-5	0.533478	1e-5	1e-5	1e-5	1e-5	1e-5	0.466432	1e-5	FALSE
I	2417103	2468912	NIC2	CB4854	1	96	40	1	51809	#CC0000	2453905988	TRUE	NIC2	TRUE	276	10944883	15037759	0.7278267326933487	0	10026706	0.6667686322144144	TRUE	0.533478	D	1e-5	1e-5	1e-5	0.533478	1e-5	1e-5	1e-5	1e-5	1e-5	0.466432	1e-5	FALSE
I	2468912	2500102	ED3048	CB4854	0.9	96	41	4	31190	#CC0B00	150684368	FALSE	NIC2	TRUE	276	10944883	15037759	0.7278267326933487	0	10026706	0.6667686322144144	TRUE	0.533478	D	1e-5	1e-5	1e-5	0.533478	1e-5	1e-5	1e-5	1e-5	1e-5	0.466432	1e-5	FALSE
I	2500102	2513751	NIC2	CB4854	1	96	42	1	13649	#CC0000	2453905988	TRUE	NIC2	TRUE	276	10944883	15037759	0.7278267326933487	0	10026706	0.6667686322144144	TRUE	0.533478	D	1e-5	1e-5	1e-5	0.533478	1e-5	1e-5	1e-5	1e-5	1e-5	0.466432	1e-5	FALSE
I	2513751	2576070	ED3048	CB4854	0.9	96	43	4	62319	#CC0B00	150684368	FALSE	NIC2	TRUE	276	10944883	15037759	0.7278267326933487	0	10026706	0.6667686322144144	TRUE	0.533478	D	1e-5	1e-5	1e-5	0.533478	1e-5	1e-5	1e-5	1e-5	1e-5	0.466432	1e-5	FALSE
I	2576070	2785019	NIC2	CB4854	1	96	44	1	208949	#CC0000	2453905988	TRUE	NIC2	TRUE	276	10944883	15037759	0.7278267326933487	0	10026706	0.6667686322144144	TRUE	0.533478	D	1e-5	1e-5	1e-5	0.533478	1e-5	1e-5	1e-5	1e-5	1e-5	0.466432	1e-5	FALSE
I	2785019	2864069	ED3048	CB4854	0.9	96	45	4	79050	#CC0B00	150684368	FALSE	NIC2	TRUE	276	10944883	15037759	0.7278267326933487	0	10026706	0.6667686322144144	TRUE	0.533478	D	1e-5	1e-5	1e-5	0.533478	1e-5	1e-5	1e-5	1e-5	1e-5	0.466432	1e-5	FALSE
I	2864069	2866511	NIC2	CB4854	1	96	46	1	2442	#CC0000	2453905988	TRUE	NIC2	TRUE	276	10944883	15037759	0.7278267326933487	0	10026706	0.6667686322144144	TRUE	0.533478	D	1e-5	1e-5	1e-5	0.533478	1e-5	1e-5	1e-5	1e-5	1e-5	0.466432	1e-5	FALSE
I	2866511	2867958	ED3048	CB4854	0.9	96	47	4	1447	#CC0B00	150684368	FALSE	NIC2	TRUE	276	10944883	15037759	0.7278267326933487	0	10026706	0.6667686322144144	TRUE	0.533478	D	1e-5	1e-5	1e-5	0.533478	1e-5	1e-5	1e-5	1e-5	1e-5	0.466432	1e-5	FALSE
I	2867958	12894664	NIC2	CB4854	1	96	48	1	10026706	#CC0000	2453905988	TRUE	NIC2	TRUE	276	10944883	15037759	0.7278267326933487	10026706	10026706	0.6667686322144144	TRUE	0.533478	D	1e-5	1e-5	1e-5	0.533478	1e-5	1e-5	1e-5	1e-5	1e-5	0.466432	1e-5	FALSE
I	12894664	12897314	CB4854	CB4854	0.9	96	49	96	2650	#8BFF66	806120	FALSE	NIC2	TRUE	276	10944883	15037759	0.7278267326933487	0	10026706	0.6667686322144144	TRUE	0.533478	D	1e-5	1e-5	1e-5	0.533478	1e-5	1e-5	1e-5	1e-5	1e-5	0.466432	1e-5	FALSE
I	12897314	12900727	NIC2	CB4854	1	96	50	1	3413	#CC0000	2453905988	TRUE	NIC2	TRUE	276	10944883	15037759	0.7278267326933487	0	10026706	0.6667686322144144	TRUE	0.533478	D	1e-5	1e-5	1e-5	0.533478	1e-5	1e-5	1e-5	1e-5	1e-5	0.466432	1e-5	FALSE
I	12900727	12922241	MY2535	CB4854	0.9	96	51	10	21514	#CC2200	212766310	FALSE	NIC2	TRUE	276	10944883	15037759	0.7278267326933487	0	10026706	0.6667686322144144	TRUE	0.533478	D	1e-5	1e-5	1e-5	0.533478	1e-5	1e-5	1e-5	1e-5	1e-5	0.466432	1e-5	FALSE
I	12922241	12955636	NIC2	CB4854	1	96	52	1	33395	#CC0000	2453905988	TRUE	NIC2	TRUE	276	10944883	15037759	0.7278267326933487	0	10026706	0.6667686322144144	TRUE	0.533478	D	1e-5	1e-5	1e-5	0.533478	1e-5	1e-5	1e-5	1e-5	1e-5	0.466432	1e-5	FALSE
I	12955636	12974294	MY2535	CB4854	0.9	96	53	10	18658	#CC2200	212766310	FALSE	NIC2	TRUE	276	10944883	15037759	0.7278267326933487	0	10026706	0.6667686322144144	TRUE	0.533478	D	1e-5	1e-5	1e-5	0.533478	1e-5	1e-5	1e-5	1e-5	1e-5	0.466432	1e-5	FALSE
I	12974294	12978845	NIC2	CB4854	1	96	54	1	4551	#CC0000	2453905988	TRUE	NIC2	TRUE	276	10944883	15037759	0.7278267326933487	0	10026706	0.6667686322144144	TRUE	0.533478	D	1e-5	1e-5	1e-5	0.533478	1e-5	1e-5	1e-5	1e-5	1e-5	0.466432	1e-5	FALSE
I	12978845	12988145	MY2535	CB4854	0.9	96	55	10	9300	#CC2200	212766310	FALSE	NIC2	TRUE	276	10944883	15037759	0.7278267326933487	0	10026706	0.6667686322144144	TRUE	0.533478	D	1e-5	1e-5	1e-5	0.533478	1e-5	1e-5	1e-5	1e-5	1e-5	0.466432	1e-5	FALSE
I	12988145	13021943	NIC2	CB4854	1	96	56	1	33798	#CC0000	2453905988	TRUE	NIC2	TRUE	276	10944883	15037759	0.7278267326933487	0	10026706	0.6667686322144144	TRUE	0.533478	D	1e-5	1e-5	1e-5	0.533478	1e-5	1e-5	1e-5	1e-5	1e-5	0.466432	1e-5	FALSE
I	13021943	13038469	NIC242	CB4854	0.9	96	57	40	16526	#CC9300	23039935	FALSE	NIC2	TRUE	276	10944883	15037759	0.7278267326933487	0	10026706	0.6667686322144144	TRUE	0.533478	D	1e-5	1e-5	1e-5	0.533478	1e-5	1e-5	1e-5	1e-5	1e-5	0.466432	1e-5	FALSE
I	13038469	13042744	NIC2	CB4854	1	96	58	1	4275	#CC0000	2453905988	TRUE	NIC2	TRUE	276	10944883	15037759	0.7278267326933487	0	10026706	0.6667686322144144	TRUE	0.533478	D	1e-5	1e-5	1e-5	0.533478	1e-5	1e-5	1e-5	1e-5	1e-5	0.466432	1e-5	FALSE
I	13042744	13346172	NIC242	CB4854	0.9	96	59	40	303428	#CC9300	23039935	FALSE	NIC2	TRUE	276	10944883	15037759	0.7278267326933487	0	10026706	0.6667686322144144	TRUE	0.533478	D	1e-5	1e-5	1e-5	0.533478	1e-5	1e-5	1e-5	1e-5	1e-5	0.466432	1e-5	FALSE
I	13346172	13347184	NIC2	CB4854	1	96	60	1	1012	#CC0000	2453905988	TRUE	NIC2	TRUE	276	10944883	15037759	0.7278267326933487	0	10026706	0.6667686322144144	TRUE	0.533478	D	1e-5	1e-5	1e-5	0.533478	1e-5	1e-5	1e-5	1e-5	1e-5	0.466432	1e-5	FALSE
I	13347184	13374097	JT11398	CB4854	0.9	96	61	50	26913	#FFE700	5001544	FALSE	NIC2	TRUE	276	10944883	15037759	0.7278267326933487	0	10026706	0.6667686322144144	TRUE	0.533478	D	1e-5	1e-5	1e-5	0.533478	1e-5	1e-5	1e-5	1e-5	1e-5	0.466432	1e-5	FALSE
I	13374097	13482047	NIC2	CB4854	1	96	62	1	107950	#CC0000	2453905988	TRUE	NIC2	TRUE	276	10944883	15037759	0.7278267326933487	0	10026706	0.6667686322144144	TRUE	0.533478	D	1e-5	1e-5	1e-5	0.533478	1e-5	1e-5	1e-5	1e-5	1e-5	0.466432	1e-5	FALSE
I	13482047	13728493	JT11398	CB4854	0.9	96	63	50	246446	#FFE700	5001544	FALSE	NIC2	TRUE	276	10944883	15037759	0.7278267326933487	0	10026706	0.6667686322144144	TRUE	0.533478	D	1e-5	1e-5	1e-5	0.533478	1e-5	1e-5	1e-5	1e-5	1e-5	0.466432	1e-5	FALSE
I	13728493	13814800	NIC242	CB4854	0.9	96	64	40	86307	#CC9300	23039935	FALSE	NIC2	TRUE	276	10944883	15037759	0.7278267326933487	0	10026706	0.6667686322144144	TRUE	0.533478	D	1e-5	1e-5	1e-5	0.533478	1e-5	1e-5	1e-5	1e-5	1e-5	0.466432	1e-5	FALSE
I	13814800	13817676	JT11398	CB4854	0.9	96	65	50	2876	#FFE700	5001544	FALSE	NIC2	TRUE	276	10944883	15037759	0.7278267326933487	0	10026706	0.6667686322144144	TRUE	0.533478	D	1e-5	1e-5	1e-5	0.533478	1e-5	1e-5	1e-5	1e-5	1e-5	0.466432	1e-5	FALSE
I	13817676	13841499	NIC242	CB4854	0.9	96	66	40	23823	#CC9300	23039935	FALSE	NIC2	TRUE	276	10944883	15037759	0.7278267326933487	0	10026706	0.6667686322144144	TRUE	0.533478	D	1e-5	1e-5	1e-5	0.533478	1e-5	1e-5	1e-5	1e-5	1e-5	0.466432	1e-5	FALSE
I	13841499	14429958	JT11398	CB4854	0.9	96	67	50	588459	#FFE700	5001544	FALSE	NIC2	TRUE	276	10944883	15037759	0.7278267326933487	0	10026706	0.6667686322144144	TRUE	0.533478	D	1e-5	1e-5	1e-5	0.533478	1e-5	1e-5	1e-5	1e-5	1e-5	0.466432	1e-5	FALSE
I	14429958	14455198	NIC2	CB4854	1	96	68	1	25240	#CC0000	2453905988	TRUE	NIC2	TRUE	276	10944883	15037759	0.7278267326933487	0	10026706	0.6667686322144144	TRUE	0.533478	D	1e-5	1e-5	1e-5	0.533478	1e-5	1e-5	1e-5	1e-5	1e-5	0.466432	1e-5	FALSE
I	14455198	14504764	CB4854	CB4854	0.9	96	69	96	49566	#8BFF66	806120	FALSE	NIC2	TRUE	276	10944883	15037759	0.7278267326933487	0	10026706	0.6667686322144144	TRUE	0.533478	D	1e-5	1e-5	1e-5	0.533478	1e-5	1e-5	1e-5	1e-5	1e-5	0.466432	1e-5	FALSE
I	14504764	14579706	NIC2	CB4854	1	96	70	1	74942	#CC0000	2453905988	TRUE	NIC2	TRUE	276	10944883	15037759	0.7278267326933487	0	10026706	0.6667686322144144	TRUE	0.533478	D	1e-5	1e-5	1e-5	0.533478	1e-5	1e-5	1e-5	1e-5	1e-5	0.466432	1e-5	FALSE
I	14579706	14591450	NIC514	CB4854	0.9	96	71	20	11744	#FF5A00	7684863	FALSE	NIC2	TRUE	276	10944883	15037759	0.7278267326933487	0	10026706	0.6667686322144144	TRUE	0.533478	D	1e-5	1e-5	1e-5	0.533478	1e-5	1e-5	1e-5	1e-5	1e-5	0.466432	1e-5	FALSE
I	14591450	14606829	NIC2	CB4854	1	96	72	1	15379	#CC0000	2453905988	TRUE	NIC2	TRUE	276	10944883	15037759	0.7278267326933487	0	10026706	0.6667686322144144	TRUE	0.533478	D	1e-5	1e-5	1e-5	0.533478	1e-5	1e-5	1e-5	1e-5	1e-5	0.466432	1e-5	FALSE
I	14606829	15041422	NIC514	CB4854	0.9	96	73	20	434593	#FF5A00	7684863	FALSE	NIC2	TRUE	276	10944883	15037759	0.7278267326933487	0	10026706	0.6667686322144144	TRUE	0.533478	D	1e-5	1e-5	1e-5	0.533478	1e-5	1e-5	1e-5	1e-5	1e-5	0.466432	1e-5	FALSE
I	3663	911546	CB4855	CB4855	1	149	1	149	907883	#00FFBB	2393018	FALSE	NIC2	TRUE	276	9106776	15037759	0.6055939585146962	0	7800462	0.5187250307708748	TRUE	0.815787	C	1e-5	1e-5	0.815787	0.184123	1e-5	1e-5	1e-5	1e-5	1e-5	1e-5	1e-5	FALSE
I	911546	912322	QG536	CB4855	1	149	2	7	776	#CC1700	59985814	FALSE	NIC2	TRUE	276	9106776	15037759	0.6055939585146962	0	7800462	0.5187250307708748	TRUE	0.815787	C	1e-5	1e-5	0.815787	0.184123	1e-5	1e-5	1e-5	1e-5	1e-5	1e-5	1e-5	FALSE
I	912322	1065699	CB4855	CB4855	1	149	3	149	153377	#00FFBB	2393018	FALSE	NIC2	TRUE	276	9106776	15037759	0.6055939585146962	0	7800462	0.5187250307708748	TRUE	0.815787	C	1e-5	1e-5	0.815787	0.184123	1e-5	1e-5	1e-5	1e-5	1e-5	1e-5	1e-5	FALSE
I	1065699	1091061	QG536	CB4855	1	149	4	7	25362	#CC1700	59985814	FALSE	NIC2	TRUE	276	9106776	15037759	0.6055939585146962	0	7800462	0.5187250307708748	TRUE	0.815787	C	1e-5	1e-5	0.815787	0.184123	1e-5	1e-5	1e-5	1e-5	1e-5	1e-5	1e-5	FALSE
I	1091061	1136414	NIC2	CB4855	1	149	5	1	45353	#CC0000	2453905988	TRUE	NIC2	TRUE	276	9106776	15037759	0.6055939585146962	0	7800462	0.5187250307708748	TRUE	0.815787	C	1e-5	1e-5	0.815787	0.184123	1e-5	1e-5	1e-5	1e-5	1e-5	1e-5	1e-5	FALSE
I	1136414	1150297	QG536	CB4855	1	149	6	7	13883	#CC1700	59985814	FALSE	NIC2	TRUE	276	9106776	15037759	0.6055939585146962	0	7800462	0.5187250307708748	TRUE	0.815787	C	1e-5	1e-5	0.815787	0.184123	1e-5	1e-5	1e-5	1e-5	1e-5	1e-5	1e-5	FALSE
I	1150297	1175482	ED3048	CB4855	0.9	149	7	4	25185	#CC0B00	150684368	FALSE	NIC2	TRUE	276	9106776	15037759	0.6055939585146962	0	7800462	0.5187250307708748	TRUE	0.815787	C	1e-5	1e-5	0.815787	0.184123	1e-5	1e-5	1e-5	1e-5	1e-5	1e-5	1e-5	FALSE
I	1175482	1182670	QG536	CB4855	1	149	8	7	7188	#CC1700	59985814	FALSE	NIC2	TRUE	276	9106776	15037759	0.6055939585146962	0	7800462	0.5187250307708748	TRUE	0.815787	C	1e-5	1e-5	0.815787	0.184123	1e-5	1e-5	1e-5	1e-5	1e-5	1e-5	1e-5	FALSE
I	1182670	1190482	ED3048	CB4855	0.9	149	9	4	7812	#CC0B00	150684368	FALSE	NIC2	TRUE	276	9106776	15037759	0.6055939585146962	0	7800462	0.5187250307708748	TRUE	0.815787	C	1e-5	1e-5	0.815787	0.184123	1e-5	1e-5	1e-5	1e-5	1e-5	1e-5	1e-5	FALSE
I	1190482	1242553	NIC2	CB4855	1	149	10	1	52071	#CC0000	2453905988	TRUE	NIC2	TRUE	276	9106776	15037759	0.6055939585146962	0	7800462	0.5187250307708748	TRUE	0.815787	C	1e-5	1e-5	0.815787	0.184123	1e-5	1e-5	1e-5	1e-5	1e-5	1e-5	1e-5	FALSE
I	1242553	1344494	ED3048	CB4855	0.9	149	11	4	101941	#CC0B00	150684368	FALSE	NIC2	TRUE	276	9106776	15037759	0.6055939585146962	0	7800462	0.5187250307708748	TRUE	0.815787	C	1e-5	1e-5	0.815787	0.184123	1e-5	1e-5	1e-5	1e-5	1e-5	1e-5	1e-5	FALSE
I	1344494	1420764	NIC2	CB4855	1	149	12	1	76270	#CC0000	2453905988	TRUE	NIC2	TRUE	276	9106776	15037759	0.6055939585146962	0	7800462	0.5187250307708748	TRUE	0.815787	C	1e-5	1e-5	0.815787	0.184123	1e-5	1e-5	1e-5	1e-5	1e-5	1e-5	1e-5	FALSE
I	1420764	1443616	ED3048	CB4855	0.9	149	13	4	22852	#CC0B00	150684368	FALSE	NIC2	TRUE	276	9106776	15037759	0.6055939585146962	0	7800462	0.5187250307708748	TRUE	0.815787	C	1e-5	1e-5	0.815787	0.184123	1e-5	1e-5	1e-5	1e-5	1e-5	1e-5	1e-5	FALSE
I	1443616	1454609	QG536	CB4855	1	149	14	7	10993	#CC1700	59985814	FALSE	NIC2	TRUE	276	9106776	15037759	0.6055939585146962	0	7800462	0.5187250307708748	TRUE	0.815787	C	1e-5	1e-5	0.815787	0.184123	1e-5	1e-5	1e-5	1e-5	1e-5	1e-5	1e-5	FALSE
I	1454609	1463349	NIC2	CB4855	1	149	15	1	8740	#CC0000	2453905988	TRUE	NIC2	TRUE	276	9106776	15037759	0.6055939585146962	0	7800462	0.5187250307708748	TRUE	0.815787	C	1e-5	1e-5	0.815787	0.184123	1e-5	1e-5	1e-5	1e-5	1e-5	1e-5	1e-5	FALSE
I	1463349	1486678	QG536	CB4855	1	149	16	7	23329	#CC1700	59985814	FALSE	NIC2	TRUE	276	9106776	15037759	0.6055939585146962	0	7800462	0.5187250307708748	TRUE	0.815787	C	1e-5	1e-5	0.815787	0.184123	1e-5	1e-5	1e-5	1e-5	1e-5	1e-5	1e-5	FALSE
I	1486678	1610423	NIC2	CB4855	1	149	17	1	123745	#CC0000	2453905988	TRUE	NIC2	TRUE	276	9106776	15037759	0.6055939585146962	0	7800462	0.5187250307708748	TRUE	0.815787	C	1e-5	1e-5	0.815787	0.184123	1e-5	1e-5	1e-5	1e-5	1e-5	1e-5	1e-5	FALSE
I	1610423	1640212	ED3048	CB4855	0.9	149	18	4	29789	#CC0B00	150684368	FALSE	NIC2	TRUE	276	9106776	15037759	0.6055939585146962	0	7800462	0.5187250307708748	TRUE	0.815787	C	1e-5	1e-5	0.815787	0.184123	1e-5	1e-5	1e-5	1e-5	1e-5	1e-5	1e-5	FALSE
I	1640212	1660874	NIC2	CB4855	1	149	19	1	20662	#CC0000	2453905988	TRUE	NIC2	TRUE	276	9106776	15037759	0.6055939585146962	0	7800462	0.5187250307708748	TRUE	0.815787	C	1e-5	1e-5	0.815787	0.184123	1e-5	1e-5	1e-5	1e-5	1e-5	1e-5	1e-5	FALSE
I	1660874	1750821	ED3048	CB4855	0.9	149	20	4	89947	#CC0B00	150684368	FALSE	NIC2	TRUE	276	9106776	15037759	0.6055939585146962	0	7800462	0.5187250307708748	TRUE	0.815787	C	1e-5	1e-5	0.815787	0.184123	1e-5	1e-5	1e-5	1e-5	1e-5	1e-5	1e-5	FALSE
I	1750821	1781567	NIC2	CB4855	1	149	21	1	30746	#CC0000	2453905988	TRUE	NIC2	TRUE	276	9106776	15037759	0.6055939585146962	0	7800462	0.5187250307708748	TRUE	0.815787	C	1e-5	1e-5	0.815787	0.184123	1e-5	1e-5	1e-5	1e-5	1e-5	1e-5	1e-5	FALSE
I	1781567	1825779	ED3048	CB4855	0.9	149	22	4	44212	#CC0B00	150684368	FALSE	NIC2	TRUE	276	9106776	15037759	0.6055939585146962	0	7800462	0.5187250307708748	TRUE	0.815787	C	1e-5	1e-5	0.815787	0.184123	1e-5	1e-5	1e-5	1e-5	1e-5	1e-5	1e-5	FALSE
I	1825779	1829697	NIC2	CB4855	1	149	23	1	3918	#CC0000	2453905988	TRUE	NIC2	TRUE	276	9106776	15037759	0.6055939585146962	0	7800462	0.5187250307708748	TRUE	0.815787	C	1e-5	1e-5	0.815787	0.184123	1e-5	1e-5	1e-5	1e-5	1e-5	1e-5	1e-5	FALSE
I	1829697	1851727	ED3048	CB4855	0.9	149	24	4	22030	#CC0B00	150684368	FALSE	NIC2	TRUE	276	9106776	15037759	0.6055939585146962	0	7800462	0.5187250307708748	TRUE	0.815787	C	1e-5	1e-5	0.815787	0.184123	1e-5	1e-5	1e-5	1e-5	1e-5	1e-5	1e-5	FALSE
I	1851727	1874368	NIC2	CB4855	1	149	25	1	22641	#CC0000	2453905988	TRUE	NIC2	TRUE	276	9106776	15037759	0.6055939585146962	0	7800462	0.5187250307708748	TRUE	0.815787	C	1e-5	1e-5	0.815787	0.184123	1e-5	1e-5	1e-5	1e-5	1e-5	1e-5	1e-5	FALSE
I	1874368	1881920	ED3048	CB4855	0.9	149	26	4	7552	#CC0B00	150684368	FALSE	NIC2	TRUE	276	9106776	15037759	0.6055939585146962	0	7800462	0.5187250307708748	TRUE	0.815787	C	1e-5	1e-5	0.815787	0.184123	1e-5	1e-5	1e-5	1e-5	1e-5	1e-5	1e-5	FALSE
I	1881920	1913957	NIC2	CB4855	1	149	27	1	32037	#CC0000	2453905988	TRUE	NIC2	TRUE	276	9106776	15037759	0.6055939585146962	0	7800462	0.5187250307708748	TRUE	0.815787	C	1e-5	1e-5	0.815787	0.184123	1e-5	1e-5	1e-5	1e-5	1e-5	1e-5	1e-5	FALSE
I	1913957	1922747	ED3048	CB4855	0.9	149	28	4	8790	#CC0B00	150684368	FALSE	NIC2	TRUE	276	9106776	15037759	0.6055939585146962	0	7800462	0.5187250307708748	TRUE	0.815787	C	1e-5	1e-5	0.815787	0.184123	1e-5	1e-5	1e-5	1e-5	1e-5	1e-5	1e-5	FALSE
I	1922747	1974234	NIC2	CB4855	1	149	29	1	51487	#CC0000	2453905988	TRUE	NIC2	TRUE	276	9106776	15037759	0.6055939585146962	0	7800462	0.5187250307708748	TRUE	0.815787	C	1e-5	1e-5	0.815787	0.184123	1e-5	1e-5	1e-5	1e-5	1e-5	1e-5	1e-5	FALSE
I	1974234	1981352	ED3048	CB4855	0.9	149	30	4	7118	#CC0B00	150684368	FALSE	NIC2	TRUE	276	9106776	15037759	0.6055939585146962	0	7800462	0.5187250307708748	TRUE	0.815787	C	1e-5	1e-5	0.815787	0.184123	1e-5	1e-5	1e-5	1e-5	1e-5	1e-5	1e-5	FALSE
I	1981352	2040543	NIC2	CB4855	1	149	31	1	59191	#CC0000	2453905988	TRUE	NIC2	TRUE	276	9106776	15037759	0.6055939585146962	0	7800462	0.5187250307708748	TRUE	0.815787	C	1e-5	1e-5	0.815787	0.184123	1e-5	1e-5	1e-5	1e-5	1e-5	1e-5	1e-5	FALSE
I	2040543	2161780	ED3048	CB4855	0.9	149	32	4	121237	#CC0B00	150684368	FALSE	NIC2	TRUE	276	9106776	15037759	0.6055939585146962	0	7800462	0.5187250307708748	TRUE	0.815787	C	1e-5	1e-5	0.815787	0.184123	1e-5	1e-5	1e-5	1e-5	1e-5	1e-5	1e-5	FALSE
I	2161780	2176348	NIC2	CB4855	1	149	33	1	14568	#CC0000	2453905988	TRUE	NIC2	TRUE	276	9106776	15037759	0.6055939585146962	0	7800462	0.5187250307708748	TRUE	0.815787	C	1e-5	1e-5	0.815787	0.184123	1e-5	1e-5	1e-5	1e-5	1e-5	1e-5	1e-5	FALSE
I	2176348	2190339	ED3048	CB4855	0.9	149	34	4	13991	#CC0B00	150684368	FALSE	NIC2	TRUE	276	9106776	15037759	0.6055939585146962	0	7800462	0.5187250307708748	TRUE	0.815787	C	1e-5	1e-5	0.815787	0.184123	1e-5	1e-5	1e-5	1e-5	1e-5	1e-5	1e-5	FALSE
I	2190339	2204010	NIC2	CB4855	1	149	35	1	13671	#CC0000	2453905988	TRUE	NIC2	TRUE	276	9106776	15037759	0.6055939585146962	0	7800462	0.5187250307708748	TRUE	0.815787	C	1e-5	1e-5	0.815787	0.184123	1e-5	1e-5	1e-5	1e-5	1e-5	1e-5	1e-5	FALSE
I	2204010	2465076	ED3048	CB4855	0.9	149	36	4	261066	#CC0B00	150684368	FALSE	NIC2	TRUE	276	9106776	15037759	0.6055939585146962	0	7800462	0.5187250307708748	TRUE	0.815787	C	1e-5	1e-5	0.815787	0.184123	1e-5	1e-5	1e-5	1e-5	1e-5	1e-5	1e-5	FALSE
I	2465076	2468912	NIC2	CB4855	1	149	37	1	3836	#CC0000	2453905988	TRUE	NIC2	TRUE	276	9106776	15037759	0.6055939585146962	0	7800462	0.5187250307708748	TRUE	0.815787	C	1e-5	1e-5	0.815787	0.184123	1e-5	1e-5	1e-5	1e-5	1e-5	1e-5	1e-5	FALSE
I	2468912	2500102	ED3048	CB4855	0.9	149	38	4	31190	#CC0B00	150684368	FALSE	NIC2	TRUE	276	9106776	15037759	0.6055939585146962	0	7800462	0.5187250307708748	TRUE	0.815787	C	1e-5	1e-5	0.815787	0.184123	1e-5	1e-5	1e-5	1e-5	1e-5	1e-5	1e-5	FALSE
I	2500102	2513751	NIC2	CB4855	1	149	39	1	13649	#CC0000	2453905988	TRUE	NIC2	TRUE	276	9106776	15037759	0.6055939585146962	0	7800462	0.5187250307708748	TRUE	0.815787	C	1e-5	1e-5	0.815787	0.184123	1e-5	1e-5	1e-5	1e-5	1e-5	1e-5	1e-5	FALSE
I	2513751	2576070	ED3048	CB4855	0.9	149	40	4	62319	#CC0B00	150684368	FALSE	NIC2	TRUE	276	9106776	15037759	0.6055939585146962	0	7800462	0.5187250307708748	TRUE	0.815787	C	1e-5	1e-5	0.815787	0.184123	1e-5	1e-5	1e-5	1e-5	1e-5	1e-5	1e-5	FALSE
I	2576070	2785019	NIC2	CB4855	1	149	41	1	208949	#CC0000	2453905988	TRUE	NIC2	TRUE	276	9106776	15037759	0.6055939585146962	0	7800462	0.5187250307708748	TRUE	0.815787	C	1e-5	1e-5	0.815787	0.184123	1e-5	1e-5	1e-5	1e-5	1e-5	1e-5	1e-5	FALSE
I	2785019	2864069	ED3048	CB4855	0.9	149	42	4	79050	#CC0B00	150684368	FALSE	NIC2	TRUE	276	9106776	15037759	0.6055939585146962	0	7800462	0.5187250307708748	TRUE	0.815787	C	1e-5	1e-5	0.815787	0.184123	1e-5	1e-5	1e-5	1e-5	1e-5	1e-5	1e-5	FALSE
I	2864069	2866511	NIC2	CB4855	1	149	43	1	2442	#CC0000	2453905988	TRUE	NIC2	TRUE	276	9106776	15037759	0.6055939585146962	0	7800462	0.5187250307708748	TRUE	0.815787	C	1e-5	1e-5	0.815787	0.184123	1e-5	1e-5	1e-5	1e-5	1e-5	1e-5	1e-5	FALSE
I	2866511	2867958	ED3048	CB4855	0.9	149	44	4	1447	#CC0B00	150684368	FALSE	NIC2	TRUE	276	9106776	15037759	0.6055939585146962	0	7800462	0.5187250307708748	TRUE	0.815787	C	1e-5	1e-5	0.815787	0.184123	1e-5	1e-5	1e-5	1e-5	1e-5	1e-5	1e-5	FALSE
I	2867958	2886099	NIC2	CB4855	1	149	45	1	18141	#CC0000	2453905988	TRUE	NIC2	TRUE	276	9106776	15037759	0.6055939585146962	0	7800462	0.5187250307708748	TRUE	0.815787	C	1e-5	1e-5	0.815787	0.184123	1e-5	1e-5	1e-5	1e-5	1e-5	1e-5	1e-5	FALSE
I	2886099	2936666	EG4946	CB4855	1	149	46	19	50567	#CC4400	33166819	FALSE	NIC2	TRUE	276	9106776	15037759	0.6055939585146962	0	7800462	0.5187250307708748	TRUE	0.815787	C	1e-5	1e-5	0.815787	0.184123	1e-5	1e-5	1e-5	1e-5	1e-5	1e-5	1e-5	FALSE
I	2936666	3018467	NIC2	CB4855	1	149	47	1	81801	#CC0000	2453905988	TRUE	NIC2	TRUE	276	9106776	15037759	0.6055939585146962	0	7800462	0.5187250307708748	TRUE	0.815787	C	1e-5	1e-5	0.815787	0.184123	1e-5	1e-5	1e-5	1e-5	1e-5	1e-5	1e-5	FALSE
I	3018467	3046978	EG4946	CB4855	1	149	48	19	28511	#CC4400	33166819	FALSE	NIC2	TRUE	276	9106776	15037759	0.6055939585146962	0	7800462	0.5187250307708748	TRUE	0.815787	C	1e-5	1e-5	0.815787	0.184123	1e-5	1e-5	1e-5	1e-5	1e-5	1e-5	1e-5	FALSE
I	3046978	3047977	NIC2	CB4855	1	149	49	1	999	#CC0000	2453905988	TRUE	NIC2	TRUE	276	9106776	15037759	0.6055939585146962	0	7800462	0.5187250307708748	TRUE	0.815787	C	1e-5	1e-5	0.815787	0.184123	1e-5	1e-5	1e-5	1e-5	1e-5	1e-5	1e-5	FALSE
I	3047977	3064995	EG4946	CB4855	1	149	50	19	17018	#CC4400	33166819	FALSE	NIC2	TRUE	276	9106776	15037759	0.6055939585146962	0	7800462	0.5187250307708748	TRUE	0.815787	C	1e-5	1e-5	0.815787	0.184123	1e-5	1e-5	1e-5	1e-5	1e-5	1e-5	1e-5	FALSE
I	3064995	3104790	NIC2	CB4855	1	149	51	1	39795	#CC0000	2453905988	TRUE	NIC2	TRUE	276	9106776	15037759	0.6055939585146962	0	7800462	0.5187250307708748	TRUE	0.815787	C	1e-5	1e-5	0.815787	0.184123	1e-5	1e-5	1e-5	1e-5	1e-5	1e-5	1e-5	FALSE
I	3104790	3410583	EG4946	CB4855	1	149	52	19	305793	#CC4400	33166819	FALSE	NIC2	TRUE	276	9106776	15037759	0.6055939585146962	0	7800462	0.5187250307708748	TRUE	0.815787	C	1e-5	1e-5	0.815787	0.184123	1e-5	1e-5	1e-5	1e-5	1e-5	1e-5	1e-5	FALSE
I	3410583	3421647	NIC2	CB4855	1	149	53	1	11064	#CC0000	2453905988	TRUE	NIC2	TRUE	276	9106776	15037759	0.6055939585146962	0	7800462	0.5187250307708748	TRUE	0.815787	C	1e-5	1e-5	0.815787	0.184123	1e-5	1e-5	1e-5	1e-5	1e-5	1e-5	1e-5	FALSE
I	3421647	3559173	EG4946	CB4855	1	149	54	19	137526	#CC4400	33166819	FALSE	NIC2	TRUE	276	9106776	15037759	0.6055939585146962	0	7800462	0.5187250307708748	TRUE	0.815787	C	1e-5	1e-5	0.815787	0.184123	1e-5	1e-5	1e-5	1e-5	1e-5	1e-5	1e-5	FALSE
I	3559173	3585161	NIC2	CB4855	1	149	55	1	25988	#CC0000	2453905988	TRUE	NIC2	TRUE	276	9106776	15037759	0.6055939585146962	0	7800462	0.5187250307708748	TRUE	0.815787	C	1e-5	1e-5	0.815787	0.184123	1e-5	1e-5	1e-5	1e-5	1e-5	1e-5	1e-5	FALSE
I	3585161	4360210	EG4946	CB4855	1	149	56	19	775049	#CC4400	33166819	FALSE	NIC2	TRUE	276	9106776	15037759	0.6055939585146962	0	7800462	0.5187250307708748	TRUE	0.815787	C	1e-5	1e-5	0.815787	0.184123	1e-5	1e-5	1e-5	1e-5	1e-5	1e-5	1e-5	FALSE
I	4360210	9946989	NIC2	CB4855	1	149	57	1	5586779	#CC0000	2453905988	TRUE	NIC2	TRUE	276	9106776	15037759	0.6055939585146962	5586779	7800462	0.5187250307708748	TRUE	0.815787	C	1e-5	1e-5	0.815787	0.184123	1e-5	1e-5	1e-5	1e-5	1e-5	1e-5	1e-5	FALSE
I	9946989	10351020	EG4347	CB4855	1	149	58	5	404031	#FF1300	122541644	FALSE	NIC2	TRUE	276	9106776	15037759	0.6055939585146962	0	7800462	0.5187250307708748	TRUE	0.815787	C	1e-5	1e-5	0.815787	0.184123	1e-5	1e-5	1e-5	1e-5	1e-5	1e-5	1e-5	FALSE
I	10351020	10354853	NIC2	CB4855	1	149	59	1	3833	#CC0000	2453905988	TRUE	NIC2	TRUE	276	9106776	15037759	0.6055939585146962	0	7800462	0.5187250307708748	TRUE	0.815787	C	1e-5	1e-5	0.815787	0.184123	1e-5	1e-5	1e-5	1e-5	1e-5	1e-5	1e-5	FALSE
I	10354853	10634911	EG4347	CB4855	1	149	60	5	280058	#FF1300	122541644	FALSE	NIC2	TRUE	276	9106776	15037759	0.6055939585146962	0	7800462	0.5187250307708748	TRUE	0.815787	C	1e-5	1e-5	0.815787	0.184123	1e-5	1e-5	1e-5	1e-5	1e-5	1e-5	1e-5	FALSE
I	10634911	10639190	NIC2	CB4855	1	149	61	1	4279	#CC0000	2453905988	TRUE	NIC2	TRUE	276	9106776	15037759	0.6055939585146962	0	7800462	0.5187250307708748	TRUE	0.815787	C	1e-5	1e-5	0.815787	0.184123	1e-5	1e-5	1e-5	1e-5	1e-5	1e-5	1e-5	FALSE
I	10639190	10883065	EG4347	CB4855	1	149	62	5	243875	#FF1300	122541644	FALSE	NIC2	TRUE	276	9106776	15037759	0.6055939585146962	0	7800462	0.5187250307708748	TRUE	0.815787	C	1e-5	1e-5	0.815787	0.184123	1e-5	1e-5	1e-5	1e-5	1e-5	1e-5	1e-5	FALSE
I	10883065	10908578	NIC2	CB4855	1	149	63	1	25513	#CC0000	2453905988	TRUE	NIC2	TRUE	276	9106776	15037759	0.6055939585146962	0	7800462	0.5187250307708748	TRUE	0.815787	C	1e-5	1e-5	0.815787	0.184123	1e-5	1e-5	1e-5	1e-5	1e-5	1e-5	1e-5	FALSE
I	10908578	11396234	EG4347	CB4855	1	149	64	5	487656	#FF1300	122541644	FALSE	NIC2	TRUE	276	9106776	15037759	0.6055939585146962	0	7800462	0.5187250307708748	TRUE	0.815787	C	1e-5	1e-5	0.815787	0.184123	1e-5	1e-5	1e-5	1e-5	1e-5	1e-5	1e-5	FALSE
I	11396234	11460051	NIC2	CB4855	1	149	65	1	63817	#CC0000	2453905988	TRUE	NIC2	TRUE	276	9106776	15037759	0.6055939585146962	0	7800462	0.5187250307708748	TRUE	0.815787	C	1e-5	1e-5	0.815787	0.184123	1e-5	1e-5	1e-5	1e-5	1e-5	1e-5	1e-5	FALSE
I	11460051	11503320	EG4347	CB4855	1	149	66	5	43269	#FF1300	122541644	FALSE	NIC2	TRUE	276	9106776	15037759	0.6055939585146962	0	7800462	0.5187250307708748	TRUE	0.815787	C	1e-5	1e-5	0.815787	0.184123	1e-5	1e-5	1e-5	1e-5	1e-5	1e-5	1e-5	FALSE
I	11503320	11551724	NIC2	CB4855	1	149	67	1	48404	#CC0000	2453905988	TRUE	NIC2	TRUE	276	9106776	15037759	0.6055939585146962	0	7800462	0.5187250307708748	TRUE	0.815787	C	1e-5	1e-5	0.815787	0.184123	1e-5	1e-5	1e-5	1e-5	1e-5	1e-5	1e-5	FALSE
I	11551724	12236997	EG4347	CB4855	1	149	68	5	685273	#FF1300	122541644	FALSE	NIC2	TRUE	276	9106776	15037759	0.6055939585146962	0	7800462	0.5187250307708748	TRUE	0.815787	C	1e-5	1e-5	0.815787	0.184123	1e-5	1e-5	1e-5	1e-5	1e-5	1e-5	1e-5	FALSE
I	12236997	12435701	NIC2	CB4855	1	149	69	1	198704	#CC0000	2453905988	TRUE	NIC2	TRUE	276	9106776	15037759	0.6055939585146962	0	7800462	0.5187250307708748	TRUE	0.815787	C	1e-5	1e-5	0.815787	0.184123	1e-5	1e-5	1e-5	1e-5	1e-5	1e-5	1e-5	FALSE
I	12435701	12618732	EG4347	CB4855	1	149	70	5	183031	#FF1300	122541644	FALSE	NIC2	TRUE	276	9106776	15037759	0.6055939585146962	0	7800462	0.5187250307708748	TRUE	0.815787	C	1e-5	1e-5	0.815787	0.184123	1e-5	1e-5	1e-5	1e-5	1e-5	1e-5	1e-5	FALSE
I	12618732	14832415	NIC2	CB4855	1	149	71	1	2213683	#CC0000	2453905988	TRUE	NIC2	TRUE	276	9106776	15037759	0.6055939585146962	2213683	7800462	0.5187250307708748	TRUE	0.815787	C	1e-5	1e-5	0.815787	0.184123	1e-5	1e-5	1e-5	1e-5	1e-5	1e-5	1e-5	FALSE
I	14832415	15041422	CX11271	CB4855	1	149	72	23	209007	#FF6800	5445413	FALSE	NIC2	TRUE	276	9106776	15037759	0.6055939585146962	0	7800462	0.5187250307708748	TRUE	0.815787	C	1e-5	1e-5	0.815787	0.184123	1e-5	1e-5	1e-5	1e-5	1e-5	1e-5	1e-5	FALSE
I	3663	1049837	ECA777	CB4856	0.9	253	1	242	1046174	#7400FF	6369493	FALSE	NIC2	TRUE	276	520347	15037759	0.034602695787317776	0	0	0	FALSE	0.9999	A	0.9999	1e-5	1e-5	1e-5	1e-5	1e-5	1e-5	1e-5	1e-5	1e-5	1e-5	TRUE
I	1049837	1058906	JU1934	CB4856	1	253	2	121	9069	#00CC2C	1585154	FALSE	NIC2	TRUE	276	520347	15037759	0.034602695787317776	0	0	0	FALSE	0.9999	A	0.9999	1e-5	1e-5	1e-5	1e-5	1e-5	1e-5	1e-5	1e-5	1e-5	1e-5	TRUE
I	1058906	1072715	JU2466	CB4856	1	253	3	9	13809	#FF7D66	20668088	FALSE	NIC2	TRUE	276	520347	15037759	0.034602695787317776	0	0	0	FALSE	0.9999	A	0.9999	1e-5	1e-5	1e-5	1e-5	1e-5	1e-5	1e-5	1e-5	1e-5	1e-5	TRUE
I	1072715	1135565	NIC275	CB4856	1	253	4	27	62850	#FFB066	13184509	FALSE	NIC2	TRUE	276	520347	15037759	0.034602695787317776	0	0	0	FALSE	0.9999	A	0.9999	1e-5	1e-5	1e-5	1e-5	1e-5	1e-5	1e-5	1e-5	1e-5	1e-5	TRUE
I	1135565	1178358	ECA703	CB4856	0.9	253	5	252	42793	#C866FF	8482527	FALSE	NIC2	TRUE	276	520347	15037759	0.034602695787317776	0	0	0	FALSE	0.9999	A	0.9999	1e-5	1e-5	1e-5	1e-5	1e-5	1e-5	1e-5	1e-5	1e-5	1e-5	TRUE
I	1248756	1248940	ECA189	CB4856	1	253	7	233	184	#4900FF	8097961	FALSE	NIC2	TRUE	276	520347	15037759	0.034602695787317776	0	0	0	FALSE	0.9999	A	0.9999	1e-5	1e-5	1e-5	1e-5	1e-5	1e-5	1e-5	1e-5	1e-5	1e-5	TRUE
I	1248940	1256473	ED3052	CB4856	1	253	8	85	7533	#5BCC00	723753	FALSE	NIC2	TRUE	276	520347	15037759	0.034602695787317776	0	0	0	FALSE	0.9999	A	0.9999	1e-5	1e-5	1e-5	1e-5	1e-5	1e-5	1e-5	1e-5	1e-5	1e-5	TRUE
I	1256473	1303949	ECA189	CB4856	1	253	9	233	47476	#4900FF	8097961	FALSE	NIC2	TRUE	276	520347	15037759	0.034602695787317776	0	0	0	FALSE	0.9999	A	0.9999	1e-5	1e-5	1e-5	1e-5	1e-5	1e-5	1e-5	1e-5	1e-5	1e-5	TRUE
I	1368795	1390094	NIC514	CB4856	0.9	253	11	20	21299	#FF5A00	7684863	FALSE	NIC2	TRUE	276	520347	15037759	0.034602695787317776	0	0	0	FALSE	0.9999	A	0.9999	1e-5	1e-5	1e-5	1e-5	1e-5	1e-5	1e-5	1e-5	1e-5	1e-5	TRUE
I	1390094	1421287	JU3125	CB4856	0.9	253	12	64	31193	#ABCC00	4629957	FALSE	NIC2	TRUE	276	520347	15037759	0.034602695787317776	0	0	0	FALSE	0.9999	A	0.9999	1e-5	1e-5	1e-5	1e-5	1e-5	1e-5	1e-5	1e-5	1e-5	1e-5	TRUE
I	1421287	1421558	JU1581	CB4856	0.9	253	13	198	271	#669DFF	5691106	FALSE	NIC2	TRUE	276	520347	15037759	0.034602695787317776	0	0	0	FALSE	0.9999	A	0.9999	1e-5	1e-5	1e-5	1e-5	1e-5	1e-5	1e-5	1e-5	1e-5	1e-5	TRUE
I	1421558	1482546	ECA777	CB4856	0.9	253	14	242	60988	#7400FF	6369493	FALSE	NIC2	TRUE	276	520347	15037759	0.034602695787317776	0	0	0	FALSE	0.9999	A	0.9999	1e-5	1e-5	1e-5	1e-5	1e-5	1e-5	1e-5	1e-5	1e-5	1e-5	TRUE
I	1482546	1496138	QX1793	CB4856	0.9	253	15	236	13592	#5700FF	1046482	FALSE	NIC2	TRUE	276	520347	15037759	0.034602695787317776	0	0	0	FALSE	0.9999	A	0.9999	1e-5	1e-5	1e-5	1e-5	1e-5	1e-5	1e-5	1e-5	1e-5	1e-5	TRUE
I	1496138	1502794	NIC2	CB4856	1	253	16	1	6656	#CC0000	2453905988	FALSE	NIC2	TRUE	276	520347	15037759	0.034602695787317776	0	0	0	FALSE	0.9999	A	0.9999	1e-5	1e-5	1e-5	1e-5	1e-5	1e-5	1e-5	1e-5	1e-5	1e-5	TRUE
I	1502794	1504824	QX1793	CB4856	0.9	253	17	236	2030	#5700FF	1046482	FALSE	NIC2	TRUE	276	520347	15037759	0.034602695787317776	0	0	0	FALSE	0.9999	A	0.9999	1e-5	1e-5	1e-5	1e-5	1e-5	1e-5	1e-5	1e-5	1e-5	1e-5	TRUE
I	1504824	1517501	CB4856	CB4856	1	253	18	253	12677	#8600CC	3528838	FALSE	NIC2	TRUE	276	520347	15037759	0.034602695787317776	0	0	0	FALSE	0.9999	A	0.9999	1e-5	1e-5	1e-5	1e-5	1e-5	1e-5	1e-5	1e-5	1e-5	1e-5	TRUE
I	1557749	1583849	CB4856	CB4856	1	253	20	253	26100	#8600CC	3528838	FALSE	NIC2	TRUE	276	520347	15037759	0.034602695787317776	0	0	0	FALSE	0.9999	A	0.9999	1e-5	1e-5	1e-5	1e-5	1e-5	1e-5	1e-5	1e-5	1e-5	1e-5	TRUE
I	1583849	1610976	ECA703	CB4856	0.9	253	21	252	27127	#C866FF	8482527	FALSE	NIC2	TRUE	276	520347	15037759	0.034602695787317776	0	0	0	FALSE	0.9999	A	0.9999	1e-5	1e-5	1e-5	1e-5	1e-5	1e-5	1e-5	1e-5	1e-5	1e-5	TRUE
I	1610976	1626553	CB4856	CB4856	1	253	22	253	15577	#8600CC	3528838	FALSE	NIC2	TRUE	276	520347	15037759	0.034602695787317776	0	0	0	FALSE	0.9999	A	0.9999	1e-5	1e-5	1e-5	1e-5	1e-5	1e-5	1e-5	1e-5	1e-5	1e-5	TRUE
I	1626553	1640397	NIC527	CB4856	0.9	253	23	118	13844	#00CC21	1031040	FALSE	NIC2	TRUE	276	520347	15037759	0.034602695787317776	0	0	0	FALSE	0.9999	A	0.9999	1e-5	1e-5	1e-5	1e-5	1e-5	1e-5	1e-5	1e-5	1e-5	1e-5	TRUE
I	1640397	1667370	ECA706	CB4856	1	253	24	251	26973	#9E00FF	14662816	FALSE	NIC2	TRUE	276	520347	15037759	0.034602695787317776	0	0	0	FALSE	0.9999	A	0.9999	1e-5	1e-5	1e-5	1e-5	1e-5	1e-5	1e-5	1e-5	1e-5	1e-5	TRUE
I	1669830	1693221	NIC527	CB4856	0.9	253	26	118	23391	#00CC21	1031040	FALSE	NIC2	TRUE	276	520347	15037759	0.034602695787317776	0	0	0	FALSE	0.9999	A	0.9999	1e-5	1e-5	1e-5	1e-5	1e-5	1e-5	1e-5	1e-5	1e-5	1e-5	TRUE
I	1693221	1694645	CB4856	CB4856	1	253	27	253	1424	#8600CC	3528838	FALSE	NIC2	TRUE	276	520347	15037759	0.034602695787317776	0	0	0	FALSE	0.9999	A	0.9999	1e-5	1e-5	1e-5	1e-5	1e-5	1e-5	1e-5	1e-5	1e-5	1e-5	TRUE
I	1731420	1753985	NIC527	CB4856	0.9	253	29	118	22565	#00CC21	1031040	FALSE	NIC2	TRUE	276	520347	15037759	0.034602695787317776	0	0	0	FALSE	0.9999	A	0.9999	1e-5	1e-5	1e-5	1e-5	1e-5	1e-5	1e-5	1e-5	1e-5	1e-5	TRUE
I	1753985	1755383	ECA812	CB4856	0.9	253	30	248	1398	#9000FF	8896406	FALSE	NIC2	TRUE	276	520347	15037759	0.034602695787317776	0	0	0	FALSE	0.9999	A	0.9999	1e-5	1e-5	1e-5	1e-5	1e-5	1e-5	1e-5	1e-5	1e-5	1e-5	TRUE
I	1805433	1829324	NIC527	CB4856	0.9	253	32	118	23891	#00CC21	1031040	FALSE	NIC2	TRUE	276	520347	15037759	0.034602695787317776	0	0	0	FALSE	0.9999	A	0.9999	1e-5	1e-5	1e-5	1e-5	1e-5	1e-5	1e-5	1e-5	1e-5	1e-5	TRUE
I	1880065	1881920	ED3048	CB4856	0.9	253	34	4	1855	#CC0B00	150684368	FALSE	NIC2	TRUE	276	520347	15037759	0.034602695787317776	0	0	0	FALSE	0.9999	A	0.9999	1e-5	1e-5	1e-5	1e-5	1e-5	1e-5	1e-5	1e-5	1e-5	1e-5	TRUE
I	1881920	1988317	NIC2	CB4856	1	253	35	1	106397	#CC0000	2453905988	FALSE	NIC2	TRUE	276	520347	15037759	0.034602695787317776	0	0	0	FALSE	0.9999	A	0.9999	1e-5	1e-5	1e-5	1e-5	1e-5	1e-5	1e-5	1e-5	1e-5	1e-5	TRUE
I	1988317	1988890	NIC277	CB4856	1	253	36	39	573	#FFD166	16231262	FALSE	NIC2	TRUE	276	520347	15037759	0.034602695787317776	0	0	0	FALSE	0.9999	A	0.9999	1e-5	1e-5	1e-5	1e-5	1e-5	1e-5	1e-5	1e-5	1e-5	1e-5	TRUE
I	1988890	2007906	NIC2	CB4856	1	253	37	1	19016	#CC0000	2453905988	FALSE	NIC2	TRUE	276	520347	15037759	0.034602695787317776	0	0	0	FALSE	0.9999	A	0.9999	1e-5	1e-5	1e-5	1e-5	1e-5	1e-5	1e-5	1e-5	1e-5	1e-5	TRUE
I	2007906	2183457	NIC242	CB4856	0.9	253	38	40	175551	#CC9300	23039935	FALSE	NIC2	TRUE	276	520347	15037759	0.034602695787317776	0	0	0	FALSE	0.9999	A	0.9999	1e-5	1e-5	1e-5	1e-5	1e-5	1e-5	1e-5	1e-5	1e-5	1e-5	TRUE
I	2183457	2183628	NIC275	CB4856	1	253	39	27	171	#FFB066	13184509	FALSE	NIC2	TRUE	276	520347	15037759	0.034602695787317776	0	0	0	FALSE	0.9999	A	0.9999	1e-5	1e-5	1e-5	1e-5	1e-5	1e-5	1e-5	1e-5	1e-5	1e-5	TRUE
I	2183628	2189422	MY920	CB4856	0.9	253	40	12	5794	#FF8566	22692122	FALSE	NIC2	TRUE	276	520347	15037759	0.034602695787317776	0	0	0	FALSE	0.9999	A	0.9999	1e-5	1e-5	1e-5	1e-5	1e-5	1e-5	1e-5	1e-5	1e-5	1e-5	TRUE
I	2189422	2190339	ED3048	CB4856	0.9	253	41	4	917	#CC0B00	150684368	FALSE	NIC2	TRUE	276	520347	15037759	0.034602695787317776	0	0	0	FALSE	0.9999	A	0.9999	1e-5	1e-5	1e-5	1e-5	1e-5	1e-5	1e-5	1e-5	1e-5	1e-5	TRUE
I	2190339	2264755	NIC2	CB4856	1	253	42	1	74416	#CC0000	2453905988	FALSE	NIC2	TRUE	276	520347	15037759	0.034602695787317776	0	0	0	FALSE	0.9999	A	0.9999	1e-5	1e-5	1e-5	1e-5	1e-5	1e-5	1e-5	1e-5	1e-5	1e-5	TRUE
I	2315241	2369323	CB4856	CB4856	1	253	44	253	54082	#8600CC	3528838	FALSE	NIC2	TRUE	276	520347	15037759	0.034602695787317776	0	0	0	FALSE	0.9999	A	0.9999	1e-5	1e-5	1e-5	1e-5	1e-5	1e-5	1e-5	1e-5	1e-5	1e-5	TRUE
I	2369323	2391049	ECA703	CB4856	0.9	253	45	252	21726	#C866FF	8482527	FALSE	NIC2	TRUE	276	520347	15037759	0.034602695787317776	0	0	0	FALSE	0.9999	A	0.9999	1e-5	1e-5	1e-5	1e-5	1e-5	1e-5	1e-5	1e-5	1e-5	1e-5	TRUE
I	2391049	2398806	CB4856	CB4856	1	253	46	253	7757	#8600CC	3528838	FALSE	NIC2	TRUE	276	520347	15037759	0.034602695787317776	0	0	0	FALSE	0.9999	A	0.9999	1e-5	1e-5	1e-5	1e-5	1e-5	1e-5	1e-5	1e-5	1e-5	1e-5	TRUE
I	2421680	2442722	CB4856	CB4856	1	253	48	253	21042	#8600CC	3528838	FALSE	NIC2	TRUE	276	520347	15037759	0.034602695787317776	0	0	0	FALSE	0.9999	A	0.9999	1e-5	1e-5	1e-5	1e-5	1e-5	1e-5	1e-5	1e-5	1e-5	1e-5	TRUE
I	2442722	2442922	QG536	CB4856	1	253	49	7	200	#CC1700	59985814	FALSE	NIC2	TRUE	276	520347	15037759	0.034602695787317776	0	0	0	FALSE	0.9999	A	0.9999	1e-5	1e-5	1e-5	1e-5	1e-5	1e-5	1e-5	1e-5	1e-5	1e-5	TRUE
I	2442922	2450702	CB4856	CB4856	1	253	50	253	7780	#8600CC	3528838	FALSE	NIC2	TRUE	276	520347	15037759	0.034602695787317776	0	0	0	FALSE	0.9999	A	0.9999	1e-5	1e-5	1e-5	1e-5	1e-5	1e-5	1e-5	1e-5	1e-5	1e-5	TRUE
I	2464450	2500168	NIC242	CB4856	0.9	253	52	40	35718	#CC9300	23039935	FALSE	NIC2	TRUE	276	520347	15037759	0.034602695787317776	0	0	0	FALSE	0.9999	A	0.9999	1e-5	1e-5	1e-5	1e-5	1e-5	1e-5	1e-5	1e-5	1e-5	1e-5	TRUE
I	2500168	2514125	NIC2	CB4856	1	253	53	1	13957	#CC0000	2453905988	FALSE	NIC2	TRUE	276	520347	15037759	0.034602695787317776	0	0	0	FALSE	0.9999	A	0.9999	1e-5	1e-5	1e-5	1e-5	1e-5	1e-5	1e-5	1e-5	1e-5	1e-5	TRUE
I	2514125	2533232	CB4856	CB4856	1	253	54	253	19107	#8600CC	3528838	FALSE	NIC2	TRUE	276	520347	15037759	0.034602695787317776	0	0	0	FALSE	0.9999	A	0.9999	1e-5	1e-5	1e-5	1e-5	1e-5	1e-5	1e-5	1e-5	1e-5	1e-5	TRUE
I	2533232	2535189	NIC268	CB4856	0.9	253	55	222	1957	#7366FF	28675376	FALSE	NIC2	TRUE	276	520347	15037759	0.034602695787317776	0	0	0	FALSE	0.9999	A	0.9999	1e-5	1e-5	1e-5	1e-5	1e-5	1e-5	1e-5	1e-5	1e-5	1e-5	TRUE
I	2535189	2540911	ECA706	CB4856	1	253	56	251	5722	#9E00FF	14662816	FALSE	NIC2	TRUE	276	520347	15037759	0.034602695787317776	0	0	0	FALSE	0.9999	A	0.9999	1e-5	1e-5	1e-5	1e-5	1e-5	1e-5	1e-5	1e-5	1e-5	1e-5	TRUE
I	2540911	2561135	NIC268	CB4856	0.9	253	57	222	20224	#7366FF	28675376	FALSE	NIC2	TRUE	276	520347	15037759	0.034602695787317776	0	0	0	FALSE	0.9999	A	0.9999	1e-5	1e-5	1e-5	1e-5	1e-5	1e-5	1e-5	1e-5	1e-5	1e-5	TRUE
I	2561135	2586507	ED3073	CB4856	1	253	58	47	25372	#FFD900	13479239	FALSE	NIC2	TRUE	276	520347	15037759	0.034602695787317776	0	0	0	FALSE	0.9999	A	0.9999	1e-5	1e-5	1e-5	1e-5	1e-5	1e-5	1e-5	1e-5	1e-5	1e-5	TRUE
I	2586507	2661983	ECA706	CB4856	1	253	59	251	75476	#9E00FF	14662816	FALSE	NIC2	TRUE	276	520347	15037759	0.034602695787317776	0	0	0	FALSE	0.9999	A	0.9999	1e-5	1e-5	1e-5	1e-5	1e-5	1e-5	1e-5	1e-5	1e-5	1e-5	TRUE
I	2698821	2716697	ECA706	CB4856	1	253	61	251	17876	#9E00FF	14662816	FALSE	NIC2	TRUE	276	520347	15037759	0.034602695787317776	0	0	0	FALSE	0.9999	A	0.9999	1e-5	1e-5	1e-5	1e-5	1e-5	1e-5	1e-5	1e-5	1e-5	1e-5	TRUE
I	2716697	2768753	ED3073	CB4856	1	253	62	47	52056	#FFD900	13479239	FALSE	NIC2	TRUE	276	520347	15037759	0.034602695787317776	0	0	0	FALSE	0.9999	A	0.9999	1e-5	1e-5	1e-5	1e-5	1e-5	1e-5	1e-5	1e-5	1e-5	1e-5	TRUE
I	2768753	2786397	ECA703	CB4856	0.9	253	63	252	17644	#C866FF	8482527	FALSE	NIC2	TRUE	276	520347	15037759	0.034602695787317776	0	0	0	FALSE	0.9999	A	0.9999	1e-5	1e-5	1e-5	1e-5	1e-5	1e-5	1e-5	1e-5	1e-5	1e-5	TRUE
I	2786397	2824902	NIC268	CB4856	0.9	253	64	222	38505	#7366FF	28675376	FALSE	NIC2	TRUE	276	520347	15037759	0.034602695787317776	0	0	0	FALSE	0.9999	A	0.9999	1e-5	1e-5	1e-5	1e-5	1e-5	1e-5	1e-5	1e-5	1e-5	1e-5	TRUE
I	2824902	2828788	ECA703	CB4856	0.9	253	65	252	3886	#C866FF	8482527	FALSE	NIC2	TRUE	276	520347	15037759	0.034602695787317776	0	0	0	FALSE	0.9999	A	0.9999	1e-5	1e-5	1e-5	1e-5	1e-5	1e-5	1e-5	1e-5	1e-5	1e-5	TRUE
I	2828788	2838596	ECA706	CB4856	1	253	66	251	9808	#9E00FF	14662816	FALSE	NIC2	TRUE	276	520347	15037759	0.034602695787317776	0	0	0	FALSE	0.9999	A	0.9999	1e-5	1e-5	1e-5	1e-5	1e-5	1e-5	1e-5	1e-5	1e-5	1e-5	TRUE
I	2838596	2859918	NIC268	CB4856	0.9	253	67	222	21322	#7366FF	28675376	FALSE	NIC2	TRUE	276	520347	15037759	0.034602695787317776	0	0	0	FALSE	0.9999	A	0.9999	1e-5	1e-5	1e-5	1e-5	1e-5	1e-5	1e-5	1e-5	1e-5	1e-5	TRUE
I	2859918	2887630	ECA706	CB4856	1	253	68	251	27712	#9E00FF	14662816	FALSE	NIC2	TRUE	276	520347	15037759	0.034602695787317776	0	0	0	FALSE	0.9999	A	0.9999	1e-5	1e-5	1e-5	1e-5	1e-5	1e-5	1e-5	1e-5	1e-5	1e-5	TRUE
I	2933717	2936666	CB4856	CB4856	1	253	70	253	2949	#8600CC	3528838	FALSE	NIC2	TRUE	276	520347	15037759	0.034602695787317776	0	0	0	FALSE	0.9999	A	0.9999	1e-5	1e-5	1e-5	1e-5	1e-5	1e-5	1e-5	1e-5	1e-5	1e-5	TRUE
I	2936666	2940116	ECA812	CB4856	0.9	253	71	248	3450	#9000FF	8896406	FALSE	NIC2	TRUE	276	520347	15037759	0.034602695787317776	0	0	0	FALSE	0.9999	A	0.9999	1e-5	1e-5	1e-5	1e-5	1e-5	1e-5	1e-5	1e-5	1e-5	1e-5	TRUE
I	2940116	3018032	JU2007	CB4856	0.9	253	72	106	77916	#0CCC00	16302456	FALSE	NIC2	TRUE	276	520347	15037759	0.034602695787317776	0	0	0	FALSE	0.9999	A	0.9999	1e-5	1e-5	1e-5	1e-5	1e-5	1e-5	1e-5	1e-5	1e-5	1e-5	TRUE
I	3042792	3104424	XZ1515	CB4856	1	253	74	231	61632	#8C66FF	13358226	FALSE	NIC2	TRUE	276	520347	15037759	0.034602695787317776	0	0	0	FALSE	0.9999	A	0.9999	1e-5	1e-5	1e-5	1e-5	1e-5	1e-5	1e-5	1e-5	1e-5	1e-5	TRUE
I	3104424	3155245	ECA777	CB4856	0.9	253	75	242	50821	#7400FF	6369493	FALSE	NIC2	TRUE	276	520347	15037759	0.034602695787317776	0	0	0	FALSE	0.9999	A	0.9999	1e-5	1e-5	1e-5	1e-5	1e-5	1e-5	1e-5	1e-5	1e-5	1e-5	TRUE
I	3155245	3155610	ED3011	CB4856	1	253	76	75	365	#C7FF66	1569040	FALSE	NIC2	TRUE	276	520347	15037759	0.034602695787317776	0	0	0	FALSE	0.9999	A	0.9999	1e-5	1e-5	1e-5	1e-5	1e-5	1e-5	1e-5	1e-5	1e-5	1e-5	TRUE
I	3176033	3186087	ECA812	CB4856	0.9	253	78	248	10054	#9000FF	8896406	FALSE	NIC2	TRUE	276	520347	15037759	0.034602695787317776	0	0	0	FALSE	0.9999	A	0.9999	1e-5	1e-5	1e-5	1e-5	1e-5	1e-5	1e-5	1e-5	1e-5	1e-5	TRUE
I	3186087	3186537	NIC268	CB4856	0.9	253	79	222	450	#7366FF	28675376	FALSE	NIC2	TRUE	276	520347	15037759	0.034602695787317776	0	0	0	FALSE	0.9999	A	0.9999	1e-5	1e-5	1e-5	1e-5	1e-5	1e-5	1e-5	1e-5	1e-5	1e-5	TRUE
I	3231987	3238939	NIC2	CB4856	1	253	81	1	6952	#CC0000	2453905988	FALSE	NIC2	TRUE	276	520347	15037759	0.034602695787317776	0	0	0	FALSE	0.9999	A	0.9999	1e-5	1e-5	1e-5	1e-5	1e-5	1e-5	1e-5	1e-5	1e-5	1e-5	TRUE
I	3238939	3244786	PB306	CB4856	1	253	82	219	5847	#6A66FF	2022300	FALSE	NIC2	TRUE	276	520347	15037759	0.034602695787317776	0	0	0	FALSE	0.9999	A	0.9999	1e-5	1e-5	1e-5	1e-5	1e-5	1e-5	1e-5	1e-5	1e-5	1e-5	TRUE
I	3244786	3256474	ED3011	CB4856	1	253	83	75	11688	#C7FF66	1569040	FALSE	NIC2	TRUE	276	520347	15037759	0.034602695787317776	0	0	0	FALSE	0.9999	A	0.9999	1e-5	1e-5	1e-5	1e-5	1e-5	1e-5	1e-5	1e-5	1e-5	1e-5	TRUE
I	3260955	3264801	CB4856	CB4856	1	253	85	253	3846	#8600CC	3528838	FALSE	NIC2	TRUE	276	520347	15037759	0.034602695787317776	0	0	0	FALSE	0.9999	A	0.9999	1e-5	1e-5	1e-5	1e-5	1e-5	1e-5	1e-5	1e-5	1e-5	1e-5	TRUE
I	3264801	3267519	XZ1515	CB4856	1	253	86	231	2718	#8C66FF	13358226	FALSE	NIC2	TRUE	276	520347	15037759	0.034602695787317776	0	0	0	FALSE	0.9999	A	0.9999	1e-5	1e-5	1e-5	1e-5	1e-5	1e-5	1e-5	1e-5	1e-5	1e-5	TRUE
I	3267519	3274085	CB4856	CB4856	1	253	87	253	6566	#8600CC	3528838	FALSE	NIC2	TRUE	276	520347	15037759	0.034602695787317776	0	0	0	FALSE	0.9999	A	0.9999	1e-5	1e-5	1e-5	1e-5	1e-5	1e-5	1e-5	1e-5	1e-5	1e-5	TRUE
I	3276749	3285980	PB306	CB4856	1	253	89	219	9231	#6A66FF	2022300	FALSE	NIC2	TRUE	276	520347	15037759	0.034602695787317776	0	0	0	FALSE	0.9999	A	0.9999	1e-5	1e-5	1e-5	1e-5	1e-5	1e-5	1e-5	1e-5	1e-5	1e-5	TRUE
I	3285980	3286964	ECA706	CB4856	1	253	90	251	984	#9E00FF	14662816	FALSE	NIC2	TRUE	276	520347	15037759	0.034602695787317776	0	0	0	FALSE	0.9999	A	0.9999	1e-5	1e-5	1e-5	1e-5	1e-5	1e-5	1e-5	1e-5	1e-5	1e-5	TRUE
I	3296801	3305568	JU642	CB4856	0.9	253	92	86	8767	#6DFF00	8013148	FALSE	NIC2	TRUE	276	520347	15037759	0.034602695787317776	0	0	0	FALSE	0.9999	A	0.9999	1e-5	1e-5	1e-5	1e-5	1e-5	1e-5	1e-5	1e-5	1e-5	1e-5	TRUE
I	3305568	3312281	ED3073	CB4856	1	253	93	47	6713	#FFD900	13479239	FALSE	NIC2	TRUE	276	520347	15037759	0.034602695787317776	0	0	0	FALSE	0.9999	A	0.9999	1e-5	1e-5	1e-5	1e-5	1e-5	1e-5	1e-5	1e-5	1e-5	1e-5	TRUE
I	3493818	3501342	NIC2	CB4856	1	253	95	1	7524	#CC0000	2453905988	FALSE	NIC2	TRUE	276	520347	15037759	0.034602695787317776	0	0	0	FALSE	0.9999	A	0.9999	1e-5	1e-5	1e-5	1e-5	1e-5	1e-5	1e-5	1e-5	1e-5	1e-5	TRUE
I	3501342	3518178	JU2619	CB4856	1	253	96	135	16836	#66FFAF	5782227	FALSE	NIC2	TRUE	276	520347	15037759	0.034602695787317776	0	0	0	FALSE	0.9999	A	0.9999	1e-5	1e-5	1e-5	1e-5	1e-5	1e-5	1e-5	1e-5	1e-5	1e-5	TRUE
I	3557894	3594690	CB4856	CB4856	1	253	98	253	36796	#8600CC	3528838	FALSE	NIC2	TRUE	276	520347	15037759	0.034602695787317776	0	0	0	FALSE	0.9999	A	0.9999	1e-5	1e-5	1e-5	1e-5	1e-5	1e-5	1e-5	1e-5	1e-5	1e-5	TRUE
I	3644875	3800822	CB4856	CB4856	1	253	100	253	155947	#8600CC	3528838	FALSE	NIC2	TRUE	276	520347	15037759	0.034602695787317776	0	0	0	FALSE	0.9999	A	0.9999	1e-5	1e-5	1e-5	1e-5	1e-5	1e-5	1e-5	1e-5	1e-5	1e-5	TRUE
I	4209865	4234027	WN2002	CB4856	1	253	102	141	24162	#66FFC0	27643796	FALSE	NIC2	TRUE	276	520347	15037759	0.034602695787317776	0	0	0	FALSE	0.9999	A	0.9999	1e-5	1e-5	1e-5	1e-5	1e-5	1e-5	1e-5	1e-5	1e-5	1e-5	TRUE
I	4234027	4474026	JU2007	CB4856	0.9	253	103	106	239999	#0CCC00	16302456	FALSE	NIC2	TRUE	276	520347	15037759	0.034602695787317776	0	0	0	FALSE	0.9999	A	0.9999	1e-5	1e-5	1e-5	1e-5	1e-5	1e-5	1e-5	1e-5	1e-5	1e-5	TRUE
I	4474026	4557323	CB4856	CB4856	1	253	104	253	83297	#8600CC	3528838	FALSE	NIC2	TRUE	276	520347	15037759	0.034602695787317776	0	0	0	FALSE	0.9999	A	0.9999	1e-5	1e-5	1e-5	1e-5	1e-5	1e-5	1e-5	1e-5	1e-5	1e-5	TRUE
I	4588009	4724793	JU2007	CB4856	0.9	253	106	106	136784	#0CCC00	16302456	FALSE	NIC2	TRUE	276	520347	15037759	0.034602695787317776	0	0	0	FALSE	0.9999	A	0.9999	1e-5	1e-5	1e-5	1e-5	1e-5	1e-5	1e-5	1e-5	1e-5	1e-5	TRUE
I	4724793	4750019	JU642	CB4856	0.9	253	107	86	25226	#6DFF00	8013148	FALSE	NIC2	TRUE	276	520347	15037759	0.034602695787317776	0	0	0	FALSE	0.9999	A	0.9999	1e-5	1e-5	1e-5	1e-5	1e-5	1e-5	1e-5	1e-5	1e-5	1e-5	TRUE
I	4750019	4756410	JU2007	CB4856	0.9	253	108	106	6391	#0CCC00	16302456	FALSE	NIC2	TRUE	276	520347	15037759	0.034602695787317776	0	0	0	FALSE	0.9999	A	0.9999	1e-5	1e-5	1e-5	1e-5	1e-5	1e-5	1e-5	1e-5	1e-5	1e-5	TRUE
I	4756410	4759307	NIC2	CB4856	1	253	109	1	2897	#CC0000	2453905988	FALSE	NIC2	TRUE	276	520347	15037759	0.034602695787317776	0	0	0	FALSE	0.9999	A	0.9999	1e-5	1e-5	1e-5	1e-5	1e-5	1e-5	1e-5	1e-5	1e-5	1e-5	TRUE
I	4759307	4810760	JU2007	CB4856	0.9	253	110	106	51453	#0CCC00	16302456	FALSE	NIC2	TRUE	276	520347	15037759	0.034602695787317776	0	0	0	FALSE	0.9999	A	0.9999	1e-5	1e-5	1e-5	1e-5	1e-5	1e-5	1e-5	1e-5	1e-5	1e-5	TRUE
I	4810760	4812547	NIC526	CB4856	1	253	111	115	1787	#00CC16	6030956	FALSE	NIC2	TRUE	276	520347	15037759	0.034602695787317776	0	0	0	FALSE	0.9999	A	0.9999	1e-5	1e-5	1e-5	1e-5	1e-5	1e-5	1e-5	1e-5	1e-5	1e-5	TRUE
I	4812547	4926604	CB4856	CB4856	1	253	112	253	114057	#8600CC	3528838	FALSE	NIC2	TRUE	276	520347	15037759	0.034602695787317776	0	0	0	FALSE	0.9999	A	0.9999	1e-5	1e-5	1e-5	1e-5	1e-5	1e-5	1e-5	1e-5	1e-5	1e-5	TRUE
I	5337038	5392300	ECA706	CB4856	1	253	114	251	55262	#9E00FF	14662816	FALSE	NIC2	TRUE	276	520347	15037759	0.034602695787317776	0	0	0	FALSE	0.9999	A	0.9999	1e-5	1e-5	1e-5	1e-5	1e-5	1e-5	1e-5	1e-5	1e-5	1e-5	TRUE
I	5392300	5480318	CB4856	CB4856	1	253	115	253	88018	#8600CC	3528838	FALSE	NIC2	TRUE	276	520347	15037759	0.034602695787317776	0	0	0	FALSE	0.9999	A	0.9999	1e-5	1e-5	1e-5	1e-5	1e-5	1e-5	1e-5	1e-5	1e-5	1e-5	TRUE
I	5480318	5634389	ECA706	CB4856	1	253	116	251	154071	#9E00FF	14662816	FALSE	NIC2	TRUE	276	520347	15037759	0.034602695787317776	0	0	0	FALSE	0.9999	A	0.9999	1e-5	1e-5	1e-5	1e-5	1e-5	1e-5	1e-5	1e-5	1e-5	1e-5	TRUE
I	6014369	6028508	MY679	CB4856	0.9	253	118	66	14139	#E0FF66	22660741	FALSE	NIC2	TRUE	276	520347	15037759	0.034602695787317776	0	0	0	FALSE	0.9999	A	0.9999	1e-5	1e-5	1e-5	1e-5	1e-5	1e-5	1e-5	1e-5	1e-5	1e-5	TRUE
I	6028508	6389800	CB4856	CB4856	1	253	119	253	361292	#8600CC	3528838	FALSE	NIC2	TRUE	276	520347	15037759	0.034602695787317776	0	0	0	FALSE	0.9999	A	0.9999	1e-5	1e-5	1e-5	1e-5	1e-5	1e-5	1e-5	1e-5	1e-5	1e-5	TRUE
I	6892750	6894218	CB4856	CB4856	1	253	121	253	1468	#8600CC	3528838	FALSE	NIC2	TRUE	276	520347	15037759	0.034602695787317776	0	0	0	FALSE	0.9999	A	0.9999	1e-5	1e-5	1e-5	1e-5	1e-5	1e-5	1e-5	1e-5	1e-5	1e-5	TRUE
I	6894218	7055941	ECA703	CB4856	0.9	253	122	252	161723	#C866FF	8482527	FALSE	NIC2	TRUE	276	520347	15037759	0.034602695787317776	0	0	0	FALSE	0.9999	A	0.9999	1e-5	1e-5	1e-5	1e-5	1e-5	1e-5	1e-5	1e-5	1e-5	1e-5	TRUE
I	7055941	7078638	CB4856	CB4856	1	253	123	253	22697	#8600CC	3528838	FALSE	NIC2	TRUE	276	520347	15037759	0.034602695787317776	0	0	0	FALSE	0.9999	A	0.9999	1e-5	1e-5	1e-5	1e-5	1e-5	1e-5	1e-5	1e-5	1e-5	1e-5	TRUE
I	7078638	8131241	ECA706	CB4856	1	253	124	251	1052603	#9E00FF	14662816	FALSE	NIC2	TRUE	276	520347	15037759	0.034602695787317776	0	0	0	FALSE	0.9999	A	0.9999	1e-5	1e-5	1e-5	1e-5	1e-5	1e-5	1e-5	1e-5	1e-5	1e-5	TRUE
I	8324420	8374208	JU1896	CB4856	0.9	253	126	202	49788	#003ACC	685948	FALSE	NIC2	TRUE	276	520347	15037759	0.034602695787317776	0	0	0	FALSE	0.9999	A	0.9999	1e-5	1e-5	1e-5	1e-5	1e-5	1e-5	1e-5	1e-5	1e-5	1e-5	TRUE
I	8374208	8459419	ED3073	CB4856	1	253	127	47	85211	#FFD900	13479239	FALSE	NIC2	TRUE	276	520347	15037759	0.034602695787317776	0	0	0	FALSE	0.9999	A	0.9999	1e-5	1e-5	1e-5	1e-5	1e-5	1e-5	1e-5	1e-5	1e-5	1e-5	TRUE
I	8459419	8480567	JU1581	CB4856	0.9	253	128	198	21148	#669DFF	5691106	FALSE	NIC2	TRUE	276	520347	15037759	0.034602695787317776	0	0	0	FALSE	0.9999	A	0.9999	1e-5	1e-5	1e-5	1e-5	1e-5	1e-5	1e-5	1e-5	1e-5	1e-5	TRUE
I	8480567	8487246	ED3073	CB4856	1	253	129	47	6679	#FFD900	13479239	FALSE	NIC2	TRUE	276	520347	15037759	0.034602695787317776	0	0	0	FALSE	0.9999	A	0.9999	1e-5	1e-5	1e-5	1e-5	1e-5	1e-5	1e-5	1e-5	1e-5	1e-5	TRUE
I	8487246	8524584	JU1581	CB4856	0.9	253	130	198	37338	#669DFF	5691106	FALSE	NIC2	TRUE	276	520347	15037759	0.034602695787317776	0	0	0	FALSE	0.9999	A	0.9999	1e-5	1e-5	1e-5	1e-5	1e-5	1e-5	1e-5	1e-5	1e-5	1e-5	TRUE
I	8524584	8601777	NIC266	CB4856	1	253	131	191	77193	#007DFF	577723	FALSE	NIC2	TRUE	276	520347	15037759	0.034602695787317776	0	0	0	FALSE	0.9999	A	0.9999	1e-5	1e-5	1e-5	1e-5	1e-5	1e-5	1e-5	1e-5	1e-5	1e-5	TRUE
I	8601777	8917214	WN2002	CB4856	1	253	132	141	315437	#66FFC0	27643796	FALSE	NIC2	TRUE	276	520347	15037759	0.034602695787317776	0	0	0	FALSE	0.9999	A	0.9999	1e-5	1e-5	1e-5	1e-5	1e-5	1e-5	1e-5	1e-5	1e-5	1e-5	TRUE
I	8917214	9021128	JU1581	CB4856	0.9	253	133	198	103914	#669DFF	5691106	FALSE	NIC2	TRUE	276	520347	15037759	0.034602695787317776	0	0	0	FALSE	0.9999	A	0.9999	1e-5	1e-5	1e-5	1e-5	1e-5	1e-5	1e-5	1e-5	1e-5	1e-5	TRUE
I	9021128	9179233	WN2002	CB4856	1	253	134	141	158105	#66FFC0	27643796	FALSE	NIC2	TRUE	276	520347	15037759	0.034602695787317776	0	0	0	FALSE	0.9999	A	0.9999	1e-5	1e-5	1e-5	1e-5	1e-5	1e-5	1e-5	1e-5	1e-5	1e-5	TRUE
I	9709061	9709135	JU1581	CB4856	0.9	253	136	198	74	#669DFF	5691106	FALSE	NIC2	TRUE	276	520347	15037759	0.034602695787317776	0	0	0	FALSE	0.9999	A	0.9999	1e-5	1e-5	1e-5	1e-5	1e-5	1e-5	1e-5	1e-5	1e-5	1e-5	TRUE
I	9709135	9734355	CB4856	CB4856	1	253	137	253	25220	#8600CC	3528838	FALSE	NIC2	TRUE	276	520347	15037759	0.034602695787317776	0	0	0	FALSE	0.9999	A	0.9999	1e-5	1e-5	1e-5	1e-5	1e-5	1e-5	1e-5	1e-5	1e-5	1e-5	TRUE
I	9734355	9787927	JU1581	CB4856	0.9	253	138	198	53572	#669DFF	5691106	FALSE	NIC2	TRUE	276	520347	15037759	0.034602695787317776	0	0	0	FALSE	0.9999	A	0.9999	1e-5	1e-5	1e-5	1e-5	1e-5	1e-5	1e-5	1e-5	1e-5	1e-5	TRUE
I	9787927	9875633	ECA706	CB4856	1	253	139	251	87706	#9E00FF	14662816	FALSE	NIC2	TRUE	276	520347	15037759	0.034602695787317776	0	0	0	FALSE	0.9999	A	0.9999	1e-5	1e-5	1e-5	1e-5	1e-5	1e-5	1e-5	1e-5	1e-5	1e-5	TRUE
I	9875633	9897660	JU3137	CB4856	0.9	253	140	140	22027	#00FF91	5029502	FALSE	NIC2	TRUE	276	520347	15037759	0.034602695787317776	0	0	0	FALSE	0.9999	A	0.9999	1e-5	1e-5	1e-5	1e-5	1e-5	1e-5	1e-5	1e-5	1e-5	1e-5	TRUE
I	9897660	10002737	ECA706	CB4856	1	253	141	251	105077	#9E00FF	14662816	FALSE	NIC2	TRUE	276	520347	15037759	0.034602695787317776	0	0	0	FALSE	0.9999	A	0.9999	1e-5	1e-5	1e-5	1e-5	1e-5	1e-5	1e-5	1e-5	1e-5	1e-5	TRUE
I	10002737	10003627	JU1581	CB4856	0.9	253	142	198	890	#669DFF	5691106	FALSE	NIC2	TRUE	276	520347	15037759	0.034602695787317776	0	0	0	FALSE	0.9999	A	0.9999	1e-5	1e-5	1e-5	1e-5	1e-5	1e-5	1e-5	1e-5	1e-5	1e-5	TRUE
I	10003627	10143880	ECA706	CB4856	1	253	143	251	140253	#9E00FF	14662816	FALSE	NIC2	TRUE	276	520347	15037759	0.034602695787317776	0	0	0	FALSE	0.9999	A	0.9999	1e-5	1e-5	1e-5	1e-5	1e-5	1e-5	1e-5	1e-5	1e-5	1e-5	TRUE
I	10143880	10331967	CB4856	CB4856	1	253	144	253	188087	#8600CC	3528838	FALSE	NIC2	TRUE	276	520347	15037759	0.034602695787317776	0	0	0	FALSE	0.9999	A	0.9999	1e-5	1e-5	1e-5	1e-5	1e-5	1e-5	1e-5	1e-5	1e-5	1e-5	TRUE
I	10912532	10933174	MY2713	CB4856	0.9	253	146	126	20642	#66FF95	33304261	FALSE	NIC2	TRUE	276	520347	15037759	0.034602695787317776	0	0	0	FALSE	0.9999	A	0.9999	1e-5	1e-5	1e-5	1e-5	1e-5	1e-5	1e-5	1e-5	1e-5	1e-5	TRUE
I	10933174	10995040	ECA703	CB4856	0.9	253	147	252	61866	#C866FF	8482527	FALSE	NIC2	TRUE	276	520347	15037759	0.034602695787317776	0	0	0	FALSE	0.9999	A	0.9999	1e-5	1e-5	1e-5	1e-5	1e-5	1e-5	1e-5	1e-5	1e-5	1e-5	TRUE
I	10995040	11019459	JU2878	CB4856	0.9	253	148	82	24419	#67CC00	5006389	FALSE	NIC2	TRUE	276	520347	15037759	0.034602695787317776	0	0	0	FALSE	0.9999	A	0.9999	1e-5	1e-5	1e-5	1e-5	1e-5	1e-5	1e-5	1e-5	1e-5	1e-5	TRUE
I	11019459	11043619	JU2466	CB4856	1	253	149	9	24160	#FF7D66	20668088	FALSE	NIC2	TRUE	276	520347	15037759	0.034602695787317776	0	0	0	FALSE	0.9999	A	0.9999	1e-5	1e-5	1e-5	1e-5	1e-5	1e-5	1e-5	1e-5	1e-5	1e-5	TRUE
I	11043619	11128604	NIC2	CB4856	1	253	150	1	84985	#CC0000	2453905988	FALSE	NIC2	TRUE	276	520347	15037759	0.034602695787317776	0	0	0	FALSE	0.9999	A	0.9999	1e-5	1e-5	1e-5	1e-5	1e-5	1e-5	1e-5	1e-5	1e-5	1e-5	TRUE
I	11128604	11154595	JU2234	CB4856	1	253	151	175	25991	#00A0CC	6040291	FALSE	NIC2	TRUE	276	520347	15037759	0.034602695787317776	0	0	0	FALSE	0.9999	A	0.9999	1e-5	1e-5	1e-5	1e-5	1e-5	1e-5	1e-5	1e-5	1e-5	1e-5	TRUE
I	11154595	11156349	EG4347	CB4856	1	253	152	5	1754	#FF1300	122541644	FALSE	NIC2	TRUE	276	520347	15037759	0.034602695787317776	0	0	0	FALSE	0.9999	A	0.9999	1e-5	1e-5	1e-5	1e-5	1e-5	1e-5	1e-5	1e-5	1e-5	1e-5	TRUE
I	11156349	11509748	NIC268	CB4856	0.9	253	153	222	353399	#7366FF	28675376	FALSE	NIC2	TRUE	276	520347	15037759	0.034602695787317776	0	0	0	FALSE	0.9999	A	0.9999	1e-5	1e-5	1e-5	1e-5	1e-5	1e-5	1e-5	1e-5	1e-5	1e-5	TRUE
I	11509748	11652978	JU1212	CB4856	1	253	154	197	143230	#0060FF	3992699	FALSE	NIC2	TRUE	276	520347	15037759	0.034602695787317776	0	0	0	FALSE	0.9999	A	0.9999	1e-5	1e-5	1e-5	1e-5	1e-5	1e-5	1e-5	1e-5	1e-5	1e-5	TRUE
I	11652978	11667741	KR314	CB4856	1	253	155	81	14763	#B6FF66	29187083	FALSE	NIC2	TRUE	276	520347	15037759	0.034602695787317776	0	0	0	FALSE	0.9999	A	0.9999	1e-5	1e-5	1e-5	1e-5	1e-5	1e-5	1e-5	1e-5	1e-5	1e-5	TRUE
I	11667741	11701757	JU1212	CB4856	1	253	156	197	34016	#0060FF	3992699	FALSE	NIC2	TRUE	276	520347	15037759	0.034602695787317776	0	0	0	FALSE	0.9999	A	0.9999	1e-5	1e-5	1e-5	1e-5	1e-5	1e-5	1e-5	1e-5	1e-5	1e-5	TRUE
I	11701757	11701887	JU2619	CB4856	1	253	157	135	130	#66FFAF	5782227	FALSE	NIC2	TRUE	276	520347	15037759	0.034602695787317776	0	0	0	FALSE	0.9999	A	0.9999	1e-5	1e-5	1e-5	1e-5	1e-5	1e-5	1e-5	1e-5	1e-5	1e-5	TRUE
I	11701887	11708251	CX11276	CB4856	0.9	253	158	68	6364	#C2FF00	9157915	FALSE	NIC2	TRUE	276	520347	15037759	0.034602695787317776	0	0	0	FALSE	0.9999	A	0.9999	1e-5	1e-5	1e-5	1e-5	1e-5	1e-5	1e-5	1e-5	1e-5	1e-5	TRUE
I	11708251	11741728	NIC268	CB4856	0.9	253	159	222	33477	#7366FF	28675376	FALSE	NIC2	TRUE	276	520347	15037759	0.034602695787317776	0	0	0	FALSE	0.9999	A	0.9999	1e-5	1e-5	1e-5	1e-5	1e-5	1e-5	1e-5	1e-5	1e-5	1e-5	TRUE
I	11741728	11751446	JU1212	CB4856	1	253	160	197	9718	#0060FF	3992699	FALSE	NIC2	TRUE	276	520347	15037759	0.034602695787317776	0	0	0	FALSE	0.9999	A	0.9999	1e-5	1e-5	1e-5	1e-5	1e-5	1e-5	1e-5	1e-5	1e-5	1e-5	TRUE
I	11751446	11805571	NIC268	CB4856	0.9	253	161	222	54125	#7366FF	28675376	FALSE	NIC2	TRUE	276	520347	15037759	0.034602695787317776	0	0	0	FALSE	0.9999	A	0.9999	1e-5	1e-5	1e-5	1e-5	1e-5	1e-5	1e-5	1e-5	1e-5	1e-5	TRUE
I	11805571	11809425	CX11276	CB4856	0.9	253	162	68	3854	#C2FF00	9157915	FALSE	NIC2	TRUE	276	520347	15037759	0.034602695787317776	0	0	0	FALSE	0.9999	A	0.9999	1e-5	1e-5	1e-5	1e-5	1e-5	1e-5	1e-5	1e-5	1e-5	1e-5	TRUE
I	11809425	11830356	JU1212	CB4856	1	253	163	197	20931	#0060FF	3992699	FALSE	NIC2	TRUE	276	520347	15037759	0.034602695787317776	0	0	0	FALSE	0.9999	A	0.9999	1e-5	1e-5	1e-5	1e-5	1e-5	1e-5	1e-5	1e-5	1e-5	1e-5	TRUE
I	11830356	11831684	CX11276	CB4856	0.9	253	164	68	1328	#C2FF00	9157915	FALSE	NIC2	TRUE	276	520347	15037759	0.034602695787317776	0	0	0	FALSE	0.9999	A	0.9999	1e-5	1e-5	1e-5	1e-5	1e-5	1e-5	1e-5	1e-5	1e-5	1e-5	TRUE
I	11831684	11854165	NIC268	CB4856	0.9	253	165	222	22481	#7366FF	28675376	FALSE	NIC2	TRUE	276	520347	15037759	0.034602695787317776	0	0	0	FALSE	0.9999	A	0.9999	1e-5	1e-5	1e-5	1e-5	1e-5	1e-5	1e-5	1e-5	1e-5	1e-5	TRUE
I	11854165	11858627	MY2535	CB4856	0.9	253	166	10	4462	#CC2200	212766310	FALSE	NIC2	TRUE	276	520347	15037759	0.034602695787317776	0	0	0	FALSE	0.9999	A	0.9999	1e-5	1e-5	1e-5	1e-5	1e-5	1e-5	1e-5	1e-5	1e-5	1e-5	TRUE
I	11858627	11880687	JU2878	CB4856	0.9	253	167	82	22060	#67CC00	5006389	FALSE	NIC2	TRUE	276	520347	15037759	0.034602695787317776	0	0	0	FALSE	0.9999	A	0.9999	1e-5	1e-5	1e-5	1e-5	1e-5	1e-5	1e-5	1e-5	1e-5	1e-5	TRUE
I	11880687	11927133	JU2879	CB4856	0.9	253	168	210	46446	#667BFF	6815371	FALSE	NIC2	TRUE	276	520347	15037759	0.034602695787317776	0	0	0	FALSE	0.9999	A	0.9999	1e-5	1e-5	1e-5	1e-5	1e-5	1e-5	1e-5	1e-5	1e-5	1e-5	TRUE
I	11927133	11934201	JU1212	CB4856	1	253	169	197	7068	#0060FF	3992699	FALSE	NIC2	TRUE	276	520347	15037759	0.034602695787317776	0	0	0	FALSE	0.9999	A	0.9999	1e-5	1e-5	1e-5	1e-5	1e-5	1e-5	1e-5	1e-5	1e-5	1e-5	TRUE
I	11934201	11956890	ECA703	CB4856	0.9	253	170	252	22689	#C866FF	8482527	FALSE	NIC2	TRUE	276	520347	15037759	0.034602695787317776	0	0	0	FALSE	0.9999	A	0.9999	1e-5	1e-5	1e-5	1e-5	1e-5	1e-5	1e-5	1e-5	1e-5	1e-5	TRUE
I	11956890	11958076	ED3046	CB4856	1	253	171	69	1186	#D8FF66	14658623	FALSE	NIC2	TRUE	276	520347	15037759	0.034602695787317776	0	0	0	FALSE	0.9999	A	0.9999	1e-5	1e-5	1e-5	1e-5	1e-5	1e-5	1e-5	1e-5	1e-5	1e-5	TRUE
I	11958076	11959037	JU2878	CB4856	0.9	253	172	82	961	#67CC00	5006389	FALSE	NIC2	TRUE	276	520347	15037759	0.034602695787317776	0	0	0	FALSE	0.9999	A	0.9999	1e-5	1e-5	1e-5	1e-5	1e-5	1e-5	1e-5	1e-5	1e-5	1e-5	TRUE
I	11959037	11965347	ECA703	CB4856	0.9	253	173	252	6310	#C866FF	8482527	FALSE	NIC2	TRUE	276	520347	15037759	0.034602695787317776	0	0	0	FALSE	0.9999	A	0.9999	1e-5	1e-5	1e-5	1e-5	1e-5	1e-5	1e-5	1e-5	1e-5	1e-5	TRUE
I	11965347	11965551	ECA706	CB4856	1	253	174	251	204	#9E00FF	14662816	FALSE	NIC2	TRUE	276	520347	15037759	0.034602695787317776	0	0	0	FALSE	0.9999	A	0.9999	1e-5	1e-5	1e-5	1e-5	1e-5	1e-5	1e-5	1e-5	1e-5	1e-5	TRUE
I	11965551	11974365	JU2878	CB4856	0.9	253	175	82	8814	#67CC00	5006389	FALSE	NIC2	TRUE	276	520347	15037759	0.034602695787317776	0	0	0	FALSE	0.9999	A	0.9999	1e-5	1e-5	1e-5	1e-5	1e-5	1e-5	1e-5	1e-5	1e-5	1e-5	TRUE
I	11974365	11977272	JU1581	CB4856	0.9	253	176	198	2907	#669DFF	5691106	FALSE	NIC2	TRUE	276	520347	15037759	0.034602695787317776	0	0	0	FALSE	0.9999	A	0.9999	1e-5	1e-5	1e-5	1e-5	1e-5	1e-5	1e-5	1e-5	1e-5	1e-5	TRUE
I	11977272	11977298	JU2879	CB4856	0.9	253	177	210	26	#667BFF	6815371	FALSE	NIC2	TRUE	276	520347	15037759	0.034602695787317776	0	0	0	FALSE	0.9999	A	0.9999	1e-5	1e-5	1e-5	1e-5	1e-5	1e-5	1e-5	1e-5	1e-5	1e-5	TRUE
I	11977298	12113944	ECA703	CB4856	0.9	253	178	252	136646	#C866FF	8482527	FALSE	NIC2	TRUE	276	520347	15037759	0.034602695787317776	0	0	0	FALSE	0.9999	A	0.9999	1e-5	1e-5	1e-5	1e-5	1e-5	1e-5	1e-5	1e-5	1e-5	1e-5	TRUE
I	12113944	12143122	ED3046	CB4856	1	253	179	69	29178	#D8FF66	14658623	FALSE	NIC2	TRUE	276	520347	15037759	0.034602695787317776	0	0	0	FALSE	0.9999	A	0.9999	1e-5	1e-5	1e-5	1e-5	1e-5	1e-5	1e-5	1e-5	1e-5	1e-5	TRUE
I	12143122	12162933	CX11276	CB4856	0.9	253	180	68	19811	#C2FF00	9157915	FALSE	NIC2	TRUE	276	520347	15037759	0.034602695787317776	0	0	0	FALSE	0.9999	A	0.9999	1e-5	1e-5	1e-5	1e-5	1e-5	1e-5	1e-5	1e-5	1e-5	1e-5	TRUE
I	12162933	12660526	ECA703	CB4856	0.9	253	181	252	497593	#C866FF	8482527	FALSE	NIC2	TRUE	276	520347	15037759	0.034602695787317776	0	0	0	FALSE	0.9999	A	0.9999	1e-5	1e-5	1e-5	1e-5	1e-5	1e-5	1e-5	1e-5	1e-5	1e-5	TRUE
I	12660526	12672371	ECA710	CB4856	0.9	253	182	238	11845	#4D00CC	4760964	FALSE	NIC2	TRUE	276	520347	15037759	0.034602695787317776	0	0	0	FALSE	0.9999	A	0.9999	1e-5	1e-5	1e-5	1e-5	1e-5	1e-5	1e-5	1e-5	1e-5	1e-5	TRUE
I	12672371	12729690	ECA703	CB4856	0.9	253	183	252	57319	#C866FF	8482527	FALSE	NIC2	TRUE	276	520347	15037759	0.034602695787317776	0	0	0	FALSE	0.9999	A	0.9999	1e-5	1e-5	1e-5	1e-5	1e-5	1e-5	1e-5	1e-5	1e-5	1e-5	TRUE
I	12729690	12743690	NIC252	CB4856	1	253	184	199	14000	#0046CC	6704004	FALSE	NIC2	TRUE	276	520347	15037759	0.034602695787317776	0	0	0	FALSE	0.9999	A	0.9999	1e-5	1e-5	1e-5	1e-5	1e-5	1e-5	1e-5	1e-5	1e-5	1e-5	TRUE
I	12743690	12750678	ECA703	CB4856	0.9	253	185	252	6988	#C866FF	8482527	FALSE	NIC2	TRUE	276	520347	15037759	0.034602695787317776	0	0	0	FALSE	0.9999	A	0.9999	1e-5	1e-5	1e-5	1e-5	1e-5	1e-5	1e-5	1e-5	1e-5	1e-5	TRUE
I	12750678	12759616	QX1212	CB4856	1	253	186	185	8938	#0099FF	3919061	FALSE	NIC2	TRUE	276	520347	15037759	0.034602695787317776	0	0	0	FALSE	0.9999	A	0.9999	1e-5	1e-5	1e-5	1e-5	1e-5	1e-5	1e-5	1e-5	1e-5	1e-5	TRUE
I	12759616	12763211	MY10	CB4856	0.9	253	187	138	3595	#66FFB7	1535671	FALSE	NIC2	TRUE	276	520347	15037759	0.034602695787317776	0	0	0	FALSE	0.9999	A	0.9999	1e-5	1e-5	1e-5	1e-5	1e-5	1e-5	1e-5	1e-5	1e-5	1e-5	TRUE
I	12763211	12764500	JU2619	CB4856	1	253	188	135	1289	#66FFAF	5782227	FALSE	NIC2	TRUE	276	520347	15037759	0.034602695787317776	0	0	0	FALSE	0.9999	A	0.9999	1e-5	1e-5	1e-5	1e-5	1e-5	1e-5	1e-5	1e-5	1e-5	1e-5	TRUE
I	12764500	12768718	JU2841	CB4856	0.9	253	189	168	4218	#66F2FF	8089902	FALSE	NIC2	TRUE	276	520347	15037759	0.034602695787317776	0	0	0	FALSE	0.9999	A	0.9999	1e-5	1e-5	1e-5	1e-5	1e-5	1e-5	1e-5	1e-5	1e-5	1e-5	TRUE
I	12768718	12826771	ED3046	CB4856	1	253	190	69	58053	#D8FF66	14658623	FALSE	NIC2	TRUE	276	520347	15037759	0.034602695787317776	0	0	0	FALSE	0.9999	A	0.9999	1e-5	1e-5	1e-5	1e-5	1e-5	1e-5	1e-5	1e-5	1e-5	1e-5	TRUE
I	12826771	12829895	JU2234	CB4856	1	253	191	175	3124	#00A0CC	6040291	FALSE	NIC2	TRUE	276	520347	15037759	0.034602695787317776	0	0	0	FALSE	0.9999	A	0.9999	1e-5	1e-5	1e-5	1e-5	1e-5	1e-5	1e-5	1e-5	1e-5	1e-5	TRUE
I	12829895	12835296	ECA703	CB4856	0.9	253	192	252	5401	#C866FF	8482527	FALSE	NIC2	TRUE	276	520347	15037759	0.034602695787317776	0	0	0	FALSE	0.9999	A	0.9999	1e-5	1e-5	1e-5	1e-5	1e-5	1e-5	1e-5	1e-5	1e-5	1e-5	TRUE
I	12835296	12840056	DL226	CB4856	1	253	193	165	4760	#66FAFF	97233978	FALSE	NIC2	TRUE	276	520347	15037759	0.034602695787317776	0	0	0	FALSE	0.9999	A	0.9999	1e-5	1e-5	1e-5	1e-5	1e-5	1e-5	1e-5	1e-5	1e-5	1e-5	TRUE
I	12840056	12863669	ECA703	CB4856	0.9	253	194	252	23613	#C866FF	8482527	FALSE	NIC2	TRUE	276	520347	15037759	0.034602695787317776	0	0	0	FALSE	0.9999	A	0.9999	1e-5	1e-5	1e-5	1e-5	1e-5	1e-5	1e-5	1e-5	1e-5	1e-5	TRUE
I	12863669	12868203	DL226	CB4856	1	253	195	165	4534	#66FAFF	97233978	FALSE	NIC2	TRUE	276	520347	15037759	0.034602695787317776	0	0	0	FALSE	0.9999	A	0.9999	1e-5	1e-5	1e-5	1e-5	1e-5	1e-5	1e-5	1e-5	1e-5	1e-5	TRUE
I	12868203	12901192	ECA703	CB4856	0.9	253	196	252	32989	#C866FF	8482527	FALSE	NIC2	TRUE	276	520347	15037759	0.034602695787317776	0	0	0	FALSE	0.9999	A	0.9999	1e-5	1e-5	1e-5	1e-5	1e-5	1e-5	1e-5	1e-5	1e-5	1e-5	TRUE
I	12901192	12908427	ECA743	CB4856	0.9	253	197	234	7235	#9566FF	6012116	FALSE	NIC2	TRUE	276	520347	15037759	0.034602695787317776	0	0	0	FALSE	0.9999	A	0.9999	1e-5	1e-5	1e-5	1e-5	1e-5	1e-5	1e-5	1e-5	1e-5	1e-5	TRUE
I	12908427	12928630	ECA703	CB4856	0.9	253	198	252	20203	#C866FF	8482527	FALSE	NIC2	TRUE	276	520347	15037759	0.034602695787317776	0	0	0	FALSE	0.9999	A	0.9999	1e-5	1e-5	1e-5	1e-5	1e-5	1e-5	1e-5	1e-5	1e-5	1e-5	TRUE
I	12928630	12932308	XZ1513	CB4856	0.9	253	199	232	3678	#3700CC	2543982	FALSE	NIC2	TRUE	276	520347	15037759	0.034602695787317776	0	0	0	FALSE	0.9999	A	0.9999	1e-5	1e-5	1e-5	1e-5	1e-5	1e-5	1e-5	1e-5	1e-5	1e-5	TRUE
I	12932308	12958025	ECA743	CB4856	0.9	253	200	234	25717	#9566FF	6012116	FALSE	NIC2	TRUE	276	520347	15037759	0.034602695787317776	0	0	0	FALSE	0.9999	A	0.9999	1e-5	1e-5	1e-5	1e-5	1e-5	1e-5	1e-5	1e-5	1e-5	1e-5	TRUE
I	12958025	12974294	MY2535	CB4856	0.9	253	201	10	16269	#CC2200	212766310	FALSE	NIC2	TRUE	276	520347	15037759	0.034602695787317776	0	0	0	FALSE	0.9999	A	0.9999	1e-5	1e-5	1e-5	1e-5	1e-5	1e-5	1e-5	1e-5	1e-5	1e-5	TRUE
I	12974294	12978845	NIC2	CB4856	1	253	202	1	4551	#CC0000	2453905988	FALSE	NIC2	TRUE	276	520347	15037759	0.034602695787317776	0	0	0	FALSE	0.9999	A	0.9999	1e-5	1e-5	1e-5	1e-5	1e-5	1e-5	1e-5	1e-5	1e-5	1e-5	TRUE
I	12978845	12983876	MY2535	CB4856	0.9	253	203	10	5031	#CC2200	212766310	FALSE	NIC2	TRUE	276	520347	15037759	0.034602695787317776	0	0	0	FALSE	0.9999	A	0.9999	1e-5	1e-5	1e-5	1e-5	1e-5	1e-5	1e-5	1e-5	1e-5	1e-5	TRUE
I	12983876	12989295	JU2017	CB4856	0.9	253	204	196	5419	#0051CC	1527688	FALSE	NIC2	TRUE	276	520347	15037759	0.034602695787317776	0	0	0	FALSE	0.9999	A	0.9999	1e-5	1e-5	1e-5	1e-5	1e-5	1e-5	1e-5	1e-5	1e-5	1e-5	TRUE
I	12989295	12994560	ECA703	CB4856	0.9	253	205	252	5265	#C866FF	8482527	FALSE	NIC2	TRUE	276	520347	15037759	0.034602695787317776	0	0	0	FALSE	0.9999	A	0.9999	1e-5	1e-5	1e-5	1e-5	1e-5	1e-5	1e-5	1e-5	1e-5	1e-5	TRUE
I	12994560	13001413	QX1233	CB4856	0.9	253	206	170	6853	#00E0FF	2528076	FALSE	NIC2	TRUE	276	520347	15037759	0.034602695787317776	0	0	0	FALSE	0.9999	A	0.9999	1e-5	1e-5	1e-5	1e-5	1e-5	1e-5	1e-5	1e-5	1e-5	1e-5	TRUE
I	13001413	13001780	NIC2	CB4856	1	253	207	1	367	#CC0000	2453905988	FALSE	NIC2	TRUE	276	520347	15037759	0.034602695787317776	0	0	0	FALSE	0.9999	A	0.9999	1e-5	1e-5	1e-5	1e-5	1e-5	1e-5	1e-5	1e-5	1e-5	1e-5	TRUE
I	13001780	13009869	QX1233	CB4856	0.9	253	208	170	8089	#00E0FF	2528076	FALSE	NIC2	TRUE	276	520347	15037759	0.034602695787317776	0	0	0	FALSE	0.9999	A	0.9999	1e-5	1e-5	1e-5	1e-5	1e-5	1e-5	1e-5	1e-5	1e-5	1e-5	TRUE
I	13009869	13037729	JU2619	CB4856	1	253	209	135	27860	#66FFAF	5782227	FALSE	NIC2	TRUE	276	520347	15037759	0.034602695787317776	0	0	0	FALSE	0.9999	A	0.9999	1e-5	1e-5	1e-5	1e-5	1e-5	1e-5	1e-5	1e-5	1e-5	1e-5	TRUE
I	13037729	13038469	NIC242	CB4856	0.9	253	210	40	740	#CC9300	23039935	FALSE	NIC2	TRUE	276	520347	15037759	0.034602695787317776	0	0	0	FALSE	0.9999	A	0.9999	1e-5	1e-5	1e-5	1e-5	1e-5	1e-5	1e-5	1e-5	1e-5	1e-5	TRUE
I	13038469	13178596	NIC2	CB4856	1	253	211	1	140127	#CC0000	2453905988	FALSE	NIC2	TRUE	276	520347	15037759	0.034602695787317776	0	0	0	FALSE	0.9999	A	0.9999	1e-5	1e-5	1e-5	1e-5	1e-5	1e-5	1e-5	1e-5	1e-5	1e-5	TRUE
I	13178596	13180300	JU2619	CB4856	1	253	212	135	1704	#66FFAF	5782227	FALSE	NIC2	TRUE	276	520347	15037759	0.034602695787317776	0	0	0	FALSE	0.9999	A	0.9999	1e-5	1e-5	1e-5	1e-5	1e-5	1e-5	1e-5	1e-5	1e-5	1e-5	TRUE
I	13180300	13200993	ED3046	CB4856	1	253	213	69	20693	#D8FF66	14658623	FALSE	NIC2	TRUE	276	520347	15037759	0.034602695787317776	0	0	0	FALSE	0.9999	A	0.9999	1e-5	1e-5	1e-5	1e-5	1e-5	1e-5	1e-5	1e-5	1e-5	1e-5	TRUE
I	13200993	13200995	AB1	CB4856	1	253	214	35	2	#FFA000	12133383	FALSE	NIC2	TRUE	276	520347	15037759	0.034602695787317776	0	0	0	FALSE	0.9999	A	0.9999	1e-5	1e-5	1e-5	1e-5	1e-5	1e-5	1e-5	1e-5	1e-5	1e-5	TRUE
I	13200995	13248592	ED3046	CB4856	1	253	215	69	47597	#D8FF66	14658623	FALSE	NIC2	TRUE	276	520347	15037759	0.034602695787317776	0	0	0	FALSE	0.9999	A	0.9999	1e-5	1e-5	1e-5	1e-5	1e-5	1e-5	1e-5	1e-5	1e-5	1e-5	TRUE
I	13248592	13258360	NIC242	CB4856	0.9	253	216	40	9768	#CC9300	23039935	FALSE	NIC2	TRUE	276	520347	15037759	0.034602695787317776	0	0	0	FALSE	0.9999	A	0.9999	1e-5	1e-5	1e-5	1e-5	1e-5	1e-5	1e-5	1e-5	1e-5	1e-5	TRUE
I	13258360	13270064	JU2619	CB4856	1	253	217	135	11704	#66FFAF	5782227	FALSE	NIC2	TRUE	276	520347	15037759	0.034602695787317776	0	0	0	FALSE	0.9999	A	0.9999	1e-5	1e-5	1e-5	1e-5	1e-5	1e-5	1e-5	1e-5	1e-5	1e-5	TRUE
I	13270064	13356496	ECA703	CB4856	0.9	253	218	252	86432	#C866FF	8482527	FALSE	NIC2	TRUE	276	520347	15037759	0.034602695787317776	0	0	0	FALSE	0.9999	A	0.9999	1e-5	1e-5	1e-5	1e-5	1e-5	1e-5	1e-5	1e-5	1e-5	1e-5	TRUE
I	13356496	13361518	KR314	CB4856	1	253	219	81	5022	#B6FF66	29187083	FALSE	NIC2	TRUE	276	520347	15037759	0.034602695787317776	0	0	0	FALSE	0.9999	A	0.9999	1e-5	1e-5	1e-5	1e-5	1e-5	1e-5	1e-5	1e-5	1e-5	1e-5	TRUE
I	13361518	13373942	JU2619	CB4856	1	253	220	135	12424	#66FFAF	5782227	FALSE	NIC2	TRUE	276	520347	15037759	0.034602695787317776	0	0	0	FALSE	0.9999	A	0.9999	1e-5	1e-5	1e-5	1e-5	1e-5	1e-5	1e-5	1e-5	1e-5	1e-5	TRUE
I	13373942	13549205	ECA778	CB4856	1	253	221	239	175263	#6500FF	6478235	FALSE	NIC2	TRUE	276	520347	15037759	0.034602695787317776	0	0	0	FALSE	0.9999	A	0.9999	1e-5	1e-5	1e-5	1e-5	1e-5	1e-5	1e-5	1e-5	1e-5	1e-5	TRUE
I	13549205	13553390	NIC260	CB4856	0.9	253	222	162	4185	#66FFFB	2873870	FALSE	NIC2	TRUE	276	520347	15037759	0.034602695787317776	0	0	0	FALSE	0.9999	A	0.9999	1e-5	1e-5	1e-5	1e-5	1e-5	1e-5	1e-5	1e-5	1e-5	1e-5	TRUE
I	13553390	13675634	JU2841	CB4856	0.9	253	223	168	122244	#66F2FF	8089902	FALSE	NIC2	TRUE	276	520347	15037759	0.034602695787317776	0	0	0	FALSE	0.9999	A	0.9999	1e-5	1e-5	1e-5	1e-5	1e-5	1e-5	1e-5	1e-5	1e-5	1e-5	TRUE
I	13675634	13728493	JT11398	CB4856	0.9	253	224	50	52859	#FFE700	5001544	FALSE	NIC2	TRUE	276	520347	15037759	0.034602695787317776	0	0	0	FALSE	0.9999	A	0.9999	1e-5	1e-5	1e-5	1e-5	1e-5	1e-5	1e-5	1e-5	1e-5	1e-5	TRUE
I	13728493	13814800	NIC242	CB4856	0.9	253	225	40	86307	#CC9300	23039935	FALSE	NIC2	TRUE	276	520347	15037759	0.034602695787317776	0	0	0	FALSE	0.9999	A	0.9999	1e-5	1e-5	1e-5	1e-5	1e-5	1e-5	1e-5	1e-5	1e-5	1e-5	TRUE
I	13814800	13817676	JT11398	CB4856	0.9	253	226	50	2876	#FFE700	5001544	FALSE	NIC2	TRUE	276	520347	15037759	0.034602695787317776	0	0	0	FALSE	0.9999	A	0.9999	1e-5	1e-5	1e-5	1e-5	1e-5	1e-5	1e-5	1e-5	1e-5	1e-5	TRUE
I	13817676	13839472	NIC242	CB4856	0.9	253	227	40	21796	#CC9300	23039935	FALSE	NIC2	TRUE	276	520347	15037759	0.034602695787317776	0	0	0	FALSE	0.9999	A	0.9999	1e-5	1e-5	1e-5	1e-5	1e-5	1e-5	1e-5	1e-5	1e-5	1e-5	TRUE
I	13839472	13883744	ECA778	CB4856	1	253	228	239	44272	#6500FF	6478235	FALSE	NIC2	TRUE	276	520347	15037759	0.034602695787317776	0	0	0	FALSE	0.9999	A	0.9999	1e-5	1e-5	1e-5	1e-5	1e-5	1e-5	1e-5	1e-5	1e-5	1e-5	TRUE
I	13883744	13951542	AB1	CB4856	1	253	229	35	67798	#FFA000	12133383	FALSE	NIC2	TRUE	276	520347	15037759	0.034602695787317776	0	0	0	FALSE	0.9999	A	0.9999	1e-5	1e-5	1e-5	1e-5	1e-5	1e-5	1e-5	1e-5	1e-5	1e-5	TRUE
I	13951542	14109264	ECA778	CB4856	1	253	230	239	157722	#6500FF	6478235	FALSE	NIC2	TRUE	276	520347	15037759	0.034602695787317776	0	0	0	FALSE	0.9999	A	0.9999	1e-5	1e-5	1e-5	1e-5	1e-5	1e-5	1e-5	1e-5	1e-5	1e-5	TRUE
I	14109264	14138704	JU2841	CB4856	0.9	253	231	168	29440	#66F2FF	8089902	FALSE	NIC2	TRUE	276	520347	15037759	0.034602695787317776	0	0	0	FALSE	0.9999	A	0.9999	1e-5	1e-5	1e-5	1e-5	1e-5	1e-5	1e-5	1e-5	1e-5	1e-5	TRUE
I	14138704	14165861	JT11398	CB4856	0.9	253	232	50	27157	#FFE700	5001544	FALSE	NIC2	TRUE	276	520347	15037759	0.034602695787317776	0	0	0	FALSE	0.9999	A	0.9999	1e-5	1e-5	1e-5	1e-5	1e-5	1e-5	1e-5	1e-5	1e-5	1e-5	TRUE
I	14165861	14218363	NIC2	CB4856	1	253	233	1	52502	#CC0000	2453905988	FALSE	NIC2	TRUE	276	520347	15037759	0.034602695787317776	0	0	0	FALSE	0.9999	A	0.9999	1e-5	1e-5	1e-5	1e-5	1e-5	1e-5	1e-5	1e-5	1e-5	1e-5	TRUE
I	14218363	14266223	MY2693	CB4856	1	253	234	57	47860	#FAFF66	3121741	FALSE	NIC2	TRUE	276	520347	15037759	0.034602695787317776	0	0	0	FALSE	0.9999	A	0.9999	1e-5	1e-5	1e-5	1e-5	1e-5	1e-5	1e-5	1e-5	1e-5	1e-5	TRUE
I	14266223	14487859	ECA778	CB4856	1	253	235	239	221636	#6500FF	6478235	FALSE	NIC2	TRUE	276	520347	15037759	0.034602695787317776	0	0	0	FALSE	0.9999	A	0.9999	1e-5	1e-5	1e-5	1e-5	1e-5	1e-5	1e-5	1e-5	1e-5	1e-5	TRUE
I	14487859	14492700	QG557	CB4856	1	253	236	177	4841	#66D8FF	7265425	FALSE	NIC2	TRUE	276	520347	15037759	0.034602695787317776	0	0	0	FALSE	0.9999	A	0.9999	1e-5	1e-5	1e-5	1e-5	1e-5	1e-5	1e-5	1e-5	1e-5	1e-5	TRUE
I	14492700	14703345	ECA778	CB4856	1	253	237	239	210645	#6500FF	6478235	FALSE	NIC2	TRUE	276	520347	15037759	0.034602695787317776	0	0	0	FALSE	0.9999	A	0.9999	1e-5	1e-5	1e-5	1e-5	1e-5	1e-5	1e-5	1e-5	1e-5	1e-5	TRUE
I	14703345	14703880	ECA189	CB4856	1	253	238	233	535	#4900FF	8097961	FALSE	NIC2	TRUE	276	520347	15037759	0.034602695787317776	0	0	0	FALSE	0.9999	A	0.9999	1e-5	1e-5	1e-5	1e-5	1e-5	1e-5	1e-5	1e-5	1e-5	1e-5	TRUE
I	14703880	14716650	ECA778	CB4856	1	253	239	239	12770	#6500FF	6478235	FALSE	NIC2	TRUE	276	520347	15037759	0.034602695787317776	0	0	0	FALSE	0.9999	A	0.9999	1e-5	1e-5	1e-5	1e-5	1e-5	1e-5	1e-5	1e-5	1e-5	1e-5	TRUE
I	14716650	14733768	ECA710	CB4856	0.9	253	240	238	17118	#4D00CC	4760964	FALSE	NIC2	TRUE	276	520347	15037759	0.034602695787317776	0	0	0	FALSE	0.9999	A	0.9999	1e-5	1e-5	1e-5	1e-5	1e-5	1e-5	1e-5	1e-5	1e-5	1e-5	TRUE
I	14733768	15041422	ECA778	CB4856	1	253	241	239	307654	#6500FF	6478235	FALSE	NIC2	TRUE	276	520347	15037759	0.034602695787317776	0	0	0	FALSE	0.9999	A	0.9999	1e-5	1e-5	1e-5	1e-5	1e-5	1e-5	1e-5	1e-5	1e-5	1e-5	TRUE
I	3663	12843	CB4857	CB4857	1	95	1	95	9180	#43FF00	18360	FALSE	NIC2	TRUE	276	10473464	15037759	0.6964777132018142	0	9292714	0.6179586998302075	TRUE	0.999899	C	1e-5	1e-5	0.999899	1e-5	1e-5	1.1e-5	1e-5	1e-5	1e-5	1e-5	1e-5	FALSE
I	12843	448892	QG536	CB4857	1	95	2	7	436049	#CC1700	59985814	FALSE	NIC2	TRUE	276	10473464	15037759	0.6964777132018142	0	9292714	0.6179586998302075	TRUE	0.999899	C	1e-5	1e-5	0.999899	1e-5	1e-5	1.1e-5	1e-5	1e-5	1e-5	1e-5	1e-5	FALSE
I	448892	528414	ED3048	CB4857	0.9	95	3	4	79522	#CC0B00	150684368	FALSE	NIC2	TRUE	276	10473464	15037759	0.6964777132018142	0	9292714	0.6179586998302075	TRUE	0.999899	C	1e-5	1e-5	0.999899	1e-5	1e-5	1.1e-5	1e-5	1e-5	1e-5	1e-5	1e-5	FALSE
I	528414	835064	QG536	CB4857	1	95	4	7	306650	#CC1700	59985814	FALSE	NIC2	TRUE	276	10473464	15037759	0.6964777132018142	0	9292714	0.6179586998302075	TRUE	0.999899	C	1e-5	1e-5	0.999899	1e-5	1e-5	1.1e-5	1e-5	1e-5	1e-5	1e-5	1e-5	FALSE
I	835064	843028	ED3048	CB4857	0.9	95	5	4	7964	#CC0B00	150684368	FALSE	NIC2	TRUE	276	10473464	15037759	0.6964777132018142	0	9292714	0.6179586998302075	TRUE	0.999899	C	1e-5	1e-5	0.999899	1e-5	1e-5	1.1e-5	1e-5	1e-5	1e-5	1e-5	1e-5	FALSE
I	843028	844068	QG536	CB4857	1	95	6	7	1040	#CC1700	59985814	FALSE	NIC2	TRUE	276	10473464	15037759	0.6964777132018142	0	9292714	0.6179586998302075	TRUE	0.999899	C	1e-5	1e-5	0.999899	1e-5	1e-5	1.1e-5	1e-5	1e-5	1e-5	1e-5	1e-5	FALSE
I	844068	864435	NIC2	CB4857	1	95	7	1	20367	#CC0000	2453905988	TRUE	NIC2	TRUE	276	10473464	15037759	0.6964777132018142	0	9292714	0.6179586998302075	TRUE	0.999899	C	1e-5	1e-5	0.999899	1e-5	1e-5	1.1e-5	1e-5	1e-5	1e-5	1e-5	1e-5	FALSE
I	864435	1017980	QG536	CB4857	1	95	8	7	153545	#CC1700	59985814	FALSE	NIC2	TRUE	276	10473464	15037759	0.6964777132018142	0	9292714	0.6179586998302075	TRUE	0.999899	C	1e-5	1e-5	0.999899	1e-5	1e-5	1.1e-5	1e-5	1e-5	1e-5	1e-5	1e-5	FALSE
I	1017980	1049837	NIC2	CB4857	1	95	9	1	31857	#CC0000	2453905988	TRUE	NIC2	TRUE	276	10473464	15037759	0.6964777132018142	0	9292714	0.6179586998302075	TRUE	0.999899	C	1e-5	1e-5	0.999899	1e-5	1e-5	1.1e-5	1e-5	1e-5	1e-5	1e-5	1e-5	FALSE
I	1049837	1091061	QG536	CB4857	1	95	10	7	41224	#CC1700	59985814	FALSE	NIC2	TRUE	276	10473464	15037759	0.6964777132018142	0	9292714	0.6179586998302075	TRUE	0.999899	C	1e-5	1e-5	0.999899	1e-5	1e-5	1.1e-5	1e-5	1e-5	1e-5	1e-5	1e-5	FALSE
I	1091061	1136414	NIC2	CB4857	1	95	11	1	45353	#CC0000	2453905988	TRUE	NIC2	TRUE	276	10473464	15037759	0.6964777132018142	0	9292714	0.6179586998302075	TRUE	0.999899	C	1e-5	1e-5	0.999899	1e-5	1e-5	1.1e-5	1e-5	1e-5	1e-5	1e-5	1e-5	FALSE
I	1136414	1150297	QG536	CB4857	1	95	12	7	13883	#CC1700	59985814	FALSE	NIC2	TRUE	276	10473464	15037759	0.6964777132018142	0	9292714	0.6179586998302075	TRUE	0.999899	C	1e-5	1e-5	0.999899	1e-5	1e-5	1.1e-5	1e-5	1e-5	1e-5	1e-5	1e-5	FALSE
I	1150297	1175482	ED3048	CB4857	0.9	95	13	4	25185	#CC0B00	150684368	FALSE	NIC2	TRUE	276	10473464	15037759	0.6964777132018142	0	9292714	0.6179586998302075	TRUE	0.999899	C	1e-5	1e-5	0.999899	1e-5	1e-5	1.1e-5	1e-5	1e-5	1e-5	1e-5	1e-5	FALSE
I	1175482	1182670	QG536	CB4857	1	95	14	7	7188	#CC1700	59985814	FALSE	NIC2	TRUE	276	10473464	15037759	0.6964777132018142	0	9292714	0.6179586998302075	TRUE	0.999899	C	1e-5	1e-5	0.999899	1e-5	1e-5	1.1e-5	1e-5	1e-5	1e-5	1e-5	1e-5	FALSE
I	1182670	1190482	ED3048	CB4857	0.9	95	15	4	7812	#CC0B00	150684368	FALSE	NIC2	TRUE	276	10473464	15037759	0.6964777132018142	0	9292714	0.6179586998302075	TRUE	0.999899	C	1e-5	1e-5	0.999899	1e-5	1e-5	1.1e-5	1e-5	1e-5	1e-5	1e-5	1e-5	FALSE
I	1190482	1242553	NIC2	CB4857	1	95	16	1	52071	#CC0000	2453905988	TRUE	NIC2	TRUE	276	10473464	15037759	0.6964777132018142	0	9292714	0.6179586998302075	TRUE	0.999899	C	1e-5	1e-5	0.999899	1e-5	1e-5	1.1e-5	1e-5	1e-5	1e-5	1e-5	1e-5	FALSE
I	1242553	1344494	ED3048	CB4857	0.9	95	17	4	101941	#CC0B00	150684368	FALSE	NIC2	TRUE	276	10473464	15037759	0.6964777132018142	0	9292714	0.6179586998302075	TRUE	0.999899	C	1e-5	1e-5	0.999899	1e-5	1e-5	1.1e-5	1e-5	1e-5	1e-5	1e-5	1e-5	FALSE
I	1344494	1420764	NIC2	CB4857	1	95	18	1	76270	#CC0000	2453905988	TRUE	NIC2	TRUE	276	10473464	15037759	0.6964777132018142	0	9292714	0.6179586998302075	TRUE	0.999899	C	1e-5	1e-5	0.999899	1e-5	1e-5	1.1e-5	1e-5	1e-5	1e-5	1e-5	1e-5	FALSE
I	1420764	1443616	ED3048	CB4857	0.9	95	19	4	22852	#CC0B00	150684368	FALSE	NIC2	TRUE	276	10473464	15037759	0.6964777132018142	0	9292714	0.6179586998302075	TRUE	0.999899	C	1e-5	1e-5	0.999899	1e-5	1e-5	1.1e-5	1e-5	1e-5	1e-5	1e-5	1e-5	FALSE
I	1443616	1454609	QG536	CB4857	1	95	20	7	10993	#CC1700	59985814	FALSE	NIC2	TRUE	276	10473464	15037759	0.6964777132018142	0	9292714	0.6179586998302075	TRUE	0.999899	C	1e-5	1e-5	0.999899	1e-5	1e-5	1.1e-5	1e-5	1e-5	1e-5	1e-5	1e-5	FALSE
I	1454609	1463349	NIC2	CB4857	1	95	21	1	8740	#CC0000	2453905988	TRUE	NIC2	TRUE	276	10473464	15037759	0.6964777132018142	0	9292714	0.6179586998302075	TRUE	0.999899	C	1e-5	1e-5	0.999899	1e-5	1e-5	1.1e-5	1e-5	1e-5	1e-5	1e-5	1e-5	FALSE
I	1463349	1486678	QG536	CB4857	1	95	22	7	23329	#CC1700	59985814	FALSE	NIC2	TRUE	276	10473464	15037759	0.6964777132018142	0	9292714	0.6179586998302075	TRUE	0.999899	C	1e-5	1e-5	0.999899	1e-5	1e-5	1.1e-5	1e-5	1e-5	1e-5	1e-5	1e-5	FALSE
I	1486678	1610423	NIC2	CB4857	1	95	23	1	123745	#CC0000	2453905988	TRUE	NIC2	TRUE	276	10473464	15037759	0.6964777132018142	0	9292714	0.6179586998302075	TRUE	0.999899	C	1e-5	1e-5	0.999899	1e-5	1e-5	1.1e-5	1e-5	1e-5	1e-5	1e-5	1e-5	FALSE
I	1610423	1640212	ED3048	CB4857	0.9	95	24	4	29789	#CC0B00	150684368	FALSE	NIC2	TRUE	276	10473464	15037759	0.6964777132018142	0	9292714	0.6179586998302075	TRUE	0.999899	C	1e-5	1e-5	0.999899	1e-5	1e-5	1.1e-5	1e-5	1e-5	1e-5	1e-5	1e-5	FALSE
I	1640212	1660874	NIC2	CB4857	1	95	25	1	20662	#CC0000	2453905988	TRUE	NIC2	TRUE	276	10473464	15037759	0.6964777132018142	0	9292714	0.6179586998302075	TRUE	0.999899	C	1e-5	1e-5	0.999899	1e-5	1e-5	1.1e-5	1e-5	1e-5	1e-5	1e-5	1e-5	FALSE
I	1660874	1750821	ED3048	CB4857	0.9	95	26	4	89947	#CC0B00	150684368	FALSE	NIC2	TRUE	276	10473464	15037759	0.6964777132018142	0	9292714	0.6179586998302075	TRUE	0.999899	C	1e-5	1e-5	0.999899	1e-5	1e-5	1.1e-5	1e-5	1e-5	1e-5	1e-5	1e-5	FALSE
I	1750821	1781567	NIC2	CB4857	1	95	27	1	30746	#CC0000	2453905988	TRUE	NIC2	TRUE	276	10473464	15037759	0.6964777132018142	0	9292714	0.6179586998302075	TRUE	0.999899	C	1e-5	1e-5	0.999899	1e-5	1e-5	1.1e-5	1e-5	1e-5	1e-5	1e-5	1e-5	FALSE
I	1781567	1825779	ED3048	CB4857	0.9	95	28	4	44212	#CC0B00	150684368	FALSE	NIC2	TRUE	276	10473464	15037759	0.6964777132018142	0	9292714	0.6179586998302075	TRUE	0.999899	C	1e-5	1e-5	0.999899	1e-5	1e-5	1.1e-5	1e-5	1e-5	1e-5	1e-5	1e-5	FALSE
I	1825779	1829697	NIC2	CB4857	1	95	29	1	3918	#CC0000	2453905988	TRUE	NIC2	TRUE	276	10473464	15037759	0.6964777132018142	0	9292714	0.6179586998302075	TRUE	0.999899	C	1e-5	1e-5	0.999899	1e-5	1e-5	1.1e-5	1e-5	1e-5	1e-5	1e-5	1e-5	FALSE
I	1829697	1851727	ED3048	CB4857	0.9	95	30	4	22030	#CC0B00	150684368	FALSE	NIC2	TRUE	276	10473464	15037759	0.6964777132018142	0	9292714	0.6179586998302075	TRUE	0.999899	C	1e-5	1e-5	0.999899	1e-5	1e-5	1.1e-5	1e-5	1e-5	1e-5	1e-5	1e-5	FALSE
I	1851727	1874368	NIC2	CB4857	1	95	31	1	22641	#CC0000	2453905988	TRUE	NIC2	TRUE	276	10473464	15037759	0.6964777132018142	0	9292714	0.6179586998302075	TRUE	0.999899	C	1e-5	1e-5	0.999899	1e-5	1e-5	1.1e-5	1e-5	1e-5	1e-5	1e-5	1e-5	FALSE
I	1874368	1881920	ED3048	CB4857	0.9	95	32	4	7552	#CC0B00	150684368	FALSE	NIC2	TRUE	276	10473464	15037759	0.6964777132018142	0	9292714	0.6179586998302075	TRUE	0.999899	C	1e-5	1e-5	0.999899	1e-5	1e-5	1.1e-5	1e-5	1e-5	1e-5	1e-5	1e-5	FALSE
I	1881920	1913957	NIC2	CB4857	1	95	33	1	32037	#CC0000	2453905988	TRUE	NIC2	TRUE	276	10473464	15037759	0.6964777132018142	0	9292714	0.6179586998302075	TRUE	0.999899	C	1e-5	1e-5	0.999899	1e-5	1e-5	1.1e-5	1e-5	1e-5	1e-5	1e-5	1e-5	FALSE
I	1913957	1922747	ED3048	CB4857	0.9	95	34	4	8790	#CC0B00	150684368	FALSE	NIC2	TRUE	276	10473464	15037759	0.6964777132018142	0	9292714	0.6179586998302075	TRUE	0.999899	C	1e-5	1e-5	0.999899	1e-5	1e-5	1.1e-5	1e-5	1e-5	1e-5	1e-5	1e-5	FALSE
I	1922747	1974234	NIC2	CB4857	1	95	35	1	51487	#CC0000	2453905988	TRUE	NIC2	TRUE	276	10473464	15037759	0.6964777132018142	0	9292714	0.6179586998302075	TRUE	0.999899	C	1e-5	1e-5	0.999899	1e-5	1e-5	1.1e-5	1e-5	1e-5	1e-5	1e-5	1e-5	FALSE
I	1974234	1981352	ED3048	CB4857	0.9	95	36	4	7118	#CC0B00	150684368	FALSE	NIC2	TRUE	276	10473464	15037759	0.6964777132018142	0	9292714	0.6179586998302075	TRUE	0.999899	C	1e-5	1e-5	0.999899	1e-5	1e-5	1.1e-5	1e-5	1e-5	1e-5	1e-5	1e-5	FALSE
I	1981352	2040543	NIC2	CB4857	1	95	37	1	59191	#CC0000	2453905988	TRUE	NIC2	TRUE	276	10473464	15037759	0.6964777132018142	0	9292714	0.6179586998302075	TRUE	0.999899	C	1e-5	1e-5	0.999899	1e-5	1e-5	1.1e-5	1e-5	1e-5	1e-5	1e-5	1e-5	FALSE
I	2040543	2161780	ED3048	CB4857	0.9	95	38	4	121237	#CC0B00	150684368	FALSE	NIC2	TRUE	276	10473464	15037759	0.6964777132018142	0	9292714	0.6179586998302075	TRUE	0.999899	C	1e-5	1e-5	0.999899	1e-5	1e-5	1.1e-5	1e-5	1e-5	1e-5	1e-5	1e-5	FALSE
I	2161780	2176348	NIC2	CB4857	1	95	39	1	14568	#CC0000	2453905988	TRUE	NIC2	TRUE	276	10473464	15037759	0.6964777132018142	0	9292714	0.6179586998302075	TRUE	0.999899	C	1e-5	1e-5	0.999899	1e-5	1e-5	1.1e-5	1e-5	1e-5	1e-5	1e-5	1e-5	FALSE
I	2176348	2190339	ED3048	CB4857	0.9	95	40	4	13991	#CC0B00	150684368	FALSE	NIC2	TRUE	276	10473464	15037759	0.6964777132018142	0	9292714	0.6179586998302075	TRUE	0.999899	C	1e-5	1e-5	0.999899	1e-5	1e-5	1.1e-5	1e-5	1e-5	1e-5	1e-5	1e-5	FALSE
I	2190339	2204010	NIC2	CB4857	1	95	41	1	13671	#CC0000	2453905988	TRUE	NIC2	TRUE	276	10473464	15037759	0.6964777132018142	0	9292714	0.6179586998302075	TRUE	0.999899	C	1e-5	1e-5	0.999899	1e-5	1e-5	1.1e-5	1e-5	1e-5	1e-5	1e-5	1e-5	FALSE
I	2204010	2465076	ED3048	CB4857	0.9	95	42	4	261066	#CC0B00	150684368	FALSE	NIC2	TRUE	276	10473464	15037759	0.6964777132018142	0	9292714	0.6179586998302075	TRUE	0.999899	C	1e-5	1e-5	0.999899	1e-5	1e-5	1.1e-5	1e-5	1e-5	1e-5	1e-5	1e-5	FALSE
I	2465076	2468912	NIC2	CB4857	1	95	43	1	3836	#CC0000	2453905988	TRUE	NIC2	TRUE	276	10473464	15037759	0.6964777132018142	0	9292714	0.6179586998302075	TRUE	0.999899	C	1e-5	1e-5	0.999899	1e-5	1e-5	1.1e-5	1e-5	1e-5	1e-5	1e-5	1e-5	FALSE
I	2468912	2500102	ED3048	CB4857	0.9	95	44	4	31190	#CC0B00	150684368	FALSE	NIC2	TRUE	276	10473464	15037759	0.6964777132018142	0	9292714	0.6179586998302075	TRUE	0.999899	C	1e-5	1e-5	0.999899	1e-5	1e-5	1.1e-5	1e-5	1e-5	1e-5	1e-5	1e-5	FALSE
I	2500102	2513751	NIC2	CB4857	1	95	45	1	13649	#CC0000	2453905988	TRUE	NIC2	TRUE	276	10473464	15037759	0.6964777132018142	0	9292714	0.6179586998302075	TRUE	0.999899	C	1e-5	1e-5	0.999899	1e-5	1e-5	1.1e-5	1e-5	1e-5	1e-5	1e-5	1e-5	FALSE
I	2513751	2576070	ED3048	CB4857	0.9	95	46	4	62319	#CC0B00	150684368	FALSE	NIC2	TRUE	276	10473464	15037759	0.6964777132018142	0	9292714	0.6179586998302075	TRUE	0.999899	C	1e-5	1e-5	0.999899	1e-5	1e-5	1.1e-5	1e-5	1e-5	1e-5	1e-5	1e-5	FALSE
I	2576070	2785019	NIC2	CB4857	1	95	47	1	208949	#CC0000	2453905988	TRUE	NIC2	TRUE	276	10473464	15037759	0.6964777132018142	0	9292714	0.6179586998302075	TRUE	0.999899	C	1e-5	1e-5	0.999899	1e-5	1e-5	1.1e-5	1e-5	1e-5	1e-5	1e-5	1e-5	FALSE
I	2785019	2864069	ED3048	CB4857	0.9	95	48	4	79050	#CC0B00	150684368	FALSE	NIC2	TRUE	276	10473464	15037759	0.6964777132018142	0	9292714	0.6179586998302075	TRUE	0.999899	C	1e-5	1e-5	0.999899	1e-5	1e-5	1.1e-5	1e-5	1e-5	1e-5	1e-5	1e-5	FALSE
I	2864069	2866511	NIC2	CB4857	1	95	49	1	2442	#CC0000	2453905988	TRUE	NIC2	TRUE	276	10473464	15037759	0.6964777132018142	0	9292714	0.6179586998302075	TRUE	0.999899	C	1e-5	1e-5	0.999899	1e-5	1e-5	1.1e-5	1e-5	1e-5	1e-5	1e-5	1e-5	FALSE
I	2866511	2867958	ED3048	CB4857	0.9	95	50	4	1447	#CC0B00	150684368	FALSE	NIC2	TRUE	276	10473464	15037759	0.6964777132018142	0	9292714	0.6179586998302075	TRUE	0.999899	C	1e-5	1e-5	0.999899	1e-5	1e-5	1.1e-5	1e-5	1e-5	1e-5	1e-5	1e-5	FALSE
I	2867958	9946989	NIC2	CB4857	1	95	51	1	7079031	#CC0000	2453905988	TRUE	NIC2	TRUE	276	10473464	15037759	0.6964777132018142	7079031	9292714	0.6179586998302075	TRUE	0.999899	C	1e-5	1e-5	0.999899	1e-5	1e-5	1.1e-5	1e-5	1e-5	1e-5	1e-5	1e-5	FALSE
I	9946989	10351020	EG4347	CB4857	1	95	52	5	404031	#FF1300	122541644	FALSE	NIC2	TRUE	276	10473464	15037759	0.6964777132018142	0	9292714	0.6179586998302075	TRUE	0.999899	C	1e-5	1e-5	0.999899	1e-5	1e-5	1.1e-5	1e-5	1e-5	1e-5	1e-5	1e-5	FALSE
I	10351020	10354853	NIC2	CB4857	1	95	53	1	3833	#CC0000	2453905988	TRUE	NIC2	TRUE	276	10473464	15037759	0.6964777132018142	0	9292714	0.6179586998302075	TRUE	0.999899	C	1e-5	1e-5	0.999899	1e-5	1e-5	1.1e-5	1e-5	1e-5	1e-5	1e-5	1e-5	FALSE
I	10354853	10634911	EG4347	CB4857	1	95	54	5	280058	#FF1300	122541644	FALSE	NIC2	TRUE	276	10473464	15037759	0.6964777132018142	0	9292714	0.6179586998302075	TRUE	0.999899	C	1e-5	1e-5	0.999899	1e-5	1e-5	1.1e-5	1e-5	1e-5	1e-5	1e-5	1e-5	FALSE
I	10634911	10639190	NIC2	CB4857	1	95	55	1	4279	#CC0000	2453905988	TRUE	NIC2	TRUE	276	10473464	15037759	0.6964777132018142	0	9292714	0.6179586998302075	TRUE	0.999899	C	1e-5	1e-5	0.999899	1e-5	1e-5	1.1e-5	1e-5	1e-5	1e-5	1e-5	1e-5	FALSE
I	10639190	10883065	EG4347	CB4857	1	95	56	5	243875	#FF1300	122541644	FALSE	NIC2	TRUE	276	10473464	15037759	0.6964777132018142	0	9292714	0.6179586998302075	TRUE	0.999899	C	1e-5	1e-5	0.999899	1e-5	1e-5	1.1e-5	1e-5	1e-5	1e-5	1e-5	1e-5	FALSE
I	10883065	10908578	NIC2	CB4857	1	95	57	1	25513	#CC0000	2453905988	TRUE	NIC2	TRUE	276	10473464	15037759	0.6964777132018142	0	9292714	0.6179586998302075	TRUE	0.999899	C	1e-5	1e-5	0.999899	1e-5	1e-5	1.1e-5	1e-5	1e-5	1e-5	1e-5	1e-5	FALSE
I	10908578	11396234	EG4347	CB4857	1	95	58	5	487656	#FF1300	122541644	FALSE	NIC2	TRUE	276	10473464	15037759	0.6964777132018142	0	9292714	0.6179586998302075	TRUE	0.999899	C	1e-5	1e-5	0.999899	1e-5	1e-5	1.1e-5	1e-5	1e-5	1e-5	1e-5	1e-5	FALSE
I	11396234	11460051	NIC2	CB4857	1	95	59	1	63817	#CC0000	2453905988	TRUE	NIC2	TRUE	276	10473464	15037759	0.6964777132018142	0	9292714	0.6179586998302075	TRUE	0.999899	C	1e-5	1e-5	0.999899	1e-5	1e-5	1.1e-5	1e-5	1e-5	1e-5	1e-5	1e-5	FALSE
I	11460051	11503320	EG4347	CB4857	1	95	60	5	43269	#FF1300	122541644	FALSE	NIC2	TRUE	276	10473464	15037759	0.6964777132018142	0	9292714	0.6179586998302075	TRUE	0.999899	C	1e-5	1e-5	0.999899	1e-5	1e-5	1.1e-5	1e-5	1e-5	1e-5	1e-5	1e-5	FALSE
I	11503320	11551724	NIC2	CB4857	1	95	61	1	48404	#CC0000	2453905988	TRUE	NIC2	TRUE	276	10473464	15037759	0.6964777132018142	0	9292714	0.6179586998302075	TRUE	0.999899	C	1e-5	1e-5	0.999899	1e-5	1e-5	1.1e-5	1e-5	1e-5	1e-5	1e-5	1e-5	FALSE
I	11551724	12236997	EG4347	CB4857	1	95	62	5	685273	#FF1300	122541644	FALSE	NIC2	TRUE	276	10473464	15037759	0.6964777132018142	0	9292714	0.6179586998302075	TRUE	0.999899	C	1e-5	1e-5	0.999899	1e-5	1e-5	1.1e-5	1e-5	1e-5	1e-5	1e-5	1e-5	FALSE
I	12236997	12435701	NIC2	CB4857	1	95	63	1	198704	#CC0000	2453905988	TRUE	NIC2	TRUE	276	10473464	15037759	0.6964777132018142	0	9292714	0.6179586998302075	TRUE	0.999899	C	1e-5	1e-5	0.999899	1e-5	1e-5	1.1e-5	1e-5	1e-5	1e-5	1e-5	1e-5	FALSE
I	12435701	12618732	EG4347	CB4857	1	95	64	5	183031	#FF1300	122541644	FALSE	NIC2	TRUE	276	10473464	15037759	0.6964777132018142	0	9292714	0.6179586998302075	TRUE	0.999899	C	1e-5	1e-5	0.999899	1e-5	1e-5	1.1e-5	1e-5	1e-5	1e-5	1e-5	1e-5	FALSE
I	12618732	14832415	NIC2	CB4857	1	95	65	1	2213683	#CC0000	2453905988	TRUE	NIC2	TRUE	276	10473464	15037759	0.6964777132018142	2213683	9292714	0.6179586998302075	TRUE	0.999899	C	1e-5	1e-5	0.999899	1e-5	1e-5	1.1e-5	1e-5	1e-5	1e-5	1e-5	1e-5	FALSE
I	14832415	15041422	CX11271	CB4857	1	95	66	23	209007	#FF6800	5445413	FALSE	NIC2	TRUE	276	10473464	15037759	0.6964777132018142	0	9292714	0.6179586998302075	TRUE	0.999899	C	1e-5	1e-5	0.999899	1e-5	1e-5	1.1e-5	1e-5	1e-5	1e-5	1e-5	1e-5	FALSE
I	3663	448892	QG536	CB4858	1	46	1	7	445229	#CC1700	59985814	FALSE	NIC2	TRUE	276	9159000	15037759	0.6090668164052901	0	7800462	0.5187250307708748	TRUE	0.9999	C	1e-5	1e-5	0.9999	1e-5	1e-5	1e-5	1e-5	1e-5	1e-5	1e-5	1e-5	FALSE
I	448892	528414	ED3048	CB4858	0.9	46	2	4	79522	#CC0B00	150684368	FALSE	NIC2	TRUE	276	9159000	15037759	0.6090668164052901	0	7800462	0.5187250307708748	TRUE	0.9999	C	1e-5	1e-5	0.9999	1e-5	1e-5	1e-5	1e-5	1e-5	1e-5	1e-5	1e-5	FALSE
I	528414	835064	QG536	CB4858	1	46	3	7	306650	#CC1700	59985814	FALSE	NIC2	TRUE	276	9159000	15037759	0.6090668164052901	0	7800462	0.5187250307708748	TRUE	0.9999	C	1e-5	1e-5	0.9999	1e-5	1e-5	1e-5	1e-5	1e-5	1e-5	1e-5	1e-5	FALSE
I	835064	843028	ED3048	CB4858	0.9	46	4	4	7964	#CC0B00	150684368	FALSE	NIC2	TRUE	276	9159000	15037759	0.6090668164052901	0	7800462	0.5187250307708748	TRUE	0.9999	C	1e-5	1e-5	0.9999	1e-5	1e-5	1e-5	1e-5	1e-5	1e-5	1e-5	1e-5	FALSE
I	843028	844068	QG536	CB4858	1	46	5	7	1040	#CC1700	59985814	FALSE	NIC2	TRUE	276	9159000	15037759	0.6090668164052901	0	7800462	0.5187250307708748	TRUE	0.9999	C	1e-5	1e-5	0.9999	1e-5	1e-5	1e-5	1e-5	1e-5	1e-5	1e-5	1e-5	FALSE
I	844068	864435	NIC2	CB4858	1	46	6	1	20367	#CC0000	2453905988	TRUE	NIC2	TRUE	276	9159000	15037759	0.6090668164052901	0	7800462	0.5187250307708748	TRUE	0.9999	C	1e-5	1e-5	0.9999	1e-5	1e-5	1e-5	1e-5	1e-5	1e-5	1e-5	1e-5	FALSE
I	864435	1017980	QG536	CB4858	1	46	7	7	153545	#CC1700	59985814	FALSE	NIC2	TRUE	276	9159000	15037759	0.6090668164052901	0	7800462	0.5187250307708748	TRUE	0.9999	C	1e-5	1e-5	0.9999	1e-5	1e-5	1e-5	1e-5	1e-5	1e-5	1e-5	1e-5	FALSE
I	1017980	1049837	NIC2	CB4858	1	46	8	1	31857	#CC0000	2453905988	TRUE	NIC2	TRUE	276	9159000	15037759	0.6090668164052901	0	7800462	0.5187250307708748	TRUE	0.9999	C	1e-5	1e-5	0.9999	1e-5	1e-5	1e-5	1e-5	1e-5	1e-5	1e-5	1e-5	FALSE
I	1049837	1091061	QG536	CB4858	1	46	9	7	41224	#CC1700	59985814	FALSE	NIC2	TRUE	276	9159000	15037759	0.6090668164052901	0	7800462	0.5187250307708748	TRUE	0.9999	C	1e-5	1e-5	0.9999	1e-5	1e-5	1e-5	1e-5	1e-5	1e-5	1e-5	1e-5	FALSE
I	1091061	1136414	NIC2	CB4858	1	46	10	1	45353	#CC0000	2453905988	TRUE	NIC2	TRUE	276	9159000	15037759	0.6090668164052901	0	7800462	0.5187250307708748	TRUE	0.9999	C	1e-5	1e-5	0.9999	1e-5	1e-5	1e-5	1e-5	1e-5	1e-5	1e-5	1e-5	FALSE
I	1136414	1150297	QG536	CB4858	1	46	11	7	13883	#CC1700	59985814	FALSE	NIC2	TRUE	276	9159000	15037759	0.6090668164052901	0	7800462	0.5187250307708748	TRUE	0.9999	C	1e-5	1e-5	0.9999	1e-5	1e-5	1e-5	1e-5	1e-5	1e-5	1e-5	1e-5	FALSE
I	1150297	1175482	ED3048	CB4858	0.9	46	12	4	25185	#CC0B00	150684368	FALSE	NIC2	TRUE	276	9159000	15037759	0.6090668164052901	0	7800462	0.5187250307708748	TRUE	0.9999	C	1e-5	1e-5	0.9999	1e-5	1e-5	1e-5	1e-5	1e-5	1e-5	1e-5	1e-5	FALSE
I	1175482	1182670	QG536	CB4858	1	46	13	7	7188	#CC1700	59985814	FALSE	NIC2	TRUE	276	9159000	15037759	0.6090668164052901	0	7800462	0.5187250307708748	TRUE	0.9999	C	1e-5	1e-5	0.9999	1e-5	1e-5	1e-5	1e-5	1e-5	1e-5	1e-5	1e-5	FALSE
I	1182670	1190482	ED3048	CB4858	0.9	46	14	4	7812	#CC0B00	150684368	FALSE	NIC2	TRUE	276	9159000	15037759	0.6090668164052901	0	7800462	0.5187250307708748	TRUE	0.9999	C	1e-5	1e-5	0.9999	1e-5	1e-5	1e-5	1e-5	1e-5	1e-5	1e-5	1e-5	FALSE
I	1190482	1242553	NIC2	CB4858	1	46	15	1	52071	#CC0000	2453905988	TRUE	NIC2	TRUE	276	9159000	15037759	0.6090668164052901	0	7800462	0.5187250307708748	TRUE	0.9999	C	1e-5	1e-5	0.9999	1e-5	1e-5	1e-5	1e-5	1e-5	1e-5	1e-5	1e-5	FALSE
I	1242553	1344494	ED3048	CB4858	0.9	46	16	4	101941	#CC0B00	150684368	FALSE	NIC2	TRUE	276	9159000	15037759	0.6090668164052901	0	7800462	0.5187250307708748	TRUE	0.9999	C	1e-5	1e-5	0.9999	1e-5	1e-5	1e-5	1e-5	1e-5	1e-5	1e-5	1e-5	FALSE
I	1344494	1420764	NIC2	CB4858	1	46	17	1	76270	#CC0000	2453905988	TRUE	NIC2	TRUE	276	9159000	15037759	0.6090668164052901	0	7800462	0.5187250307708748	TRUE	0.9999	C	1e-5	1e-5	0.9999	1e-5	1e-5	1e-5	1e-5	1e-5	1e-5	1e-5	1e-5	FALSE
I	1420764	1443616	ED3048	CB4858	0.9	46	18	4	22852	#CC0B00	150684368	FALSE	NIC2	TRUE	276	9159000	15037759	0.6090668164052901	0	7800462	0.5187250307708748	TRUE	0.9999	C	1e-5	1e-5	0.9999	1e-5	1e-5	1e-5	1e-5	1e-5	1e-5	1e-5	1e-5	FALSE
I	1443616	1454609	QG536	CB4858	1	46	19	7	10993	#CC1700	59985814	FALSE	NIC2	TRUE	276	9159000	15037759	0.6090668164052901	0	7800462	0.5187250307708748	TRUE	0.9999	C	1e-5	1e-5	0.9999	1e-5	1e-5	1e-5	1e-5	1e-5	1e-5	1e-5	1e-5	FALSE
I	1454609	1463349	NIC2	CB4858	1	46	20	1	8740	#CC0000	2453905988	TRUE	NIC2	TRUE	276	9159000	15037759	0.6090668164052901	0	7800462	0.5187250307708748	TRUE	0.9999	C	1e-5	1e-5	0.9999	1e-5	1e-5	1e-5	1e-5	1e-5	1e-5	1e-5	1e-5	FALSE
I	1463349	1486678	QG536	CB4858	1	46	21	7	23329	#CC1700	59985814	FALSE	NIC2	TRUE	276	9159000	15037759	0.6090668164052901	0	7800462	0.5187250307708748	TRUE	0.9999	C	1e-5	1e-5	0.9999	1e-5	1e-5	1e-5	1e-5	1e-5	1e-5	1e-5	1e-5	FALSE
I	1486678	1610423	NIC2	CB4858	1	46	22	1	123745	#CC0000	2453905988	TRUE	NIC2	TRUE	276	9159000	15037759	0.6090668164052901	0	7800462	0.5187250307708748	TRUE	0.9999	C	1e-5	1e-5	0.9999	1e-5	1e-5	1e-5	1e-5	1e-5	1e-5	1e-5	1e-5	FALSE
I	1610423	1640212	ED3048	CB4858	0.9	46	23	4	29789	#CC0B00	150684368	FALSE	NIC2	TRUE	276	9159000	15037759	0.6090668164052901	0	7800462	0.5187250307708748	TRUE	0.9999	C	1e-5	1e-5	0.9999	1e-5	1e-5	1e-5	1e-5	1e-5	1e-5	1e-5	1e-5	FALSE
I	1640212	1660874	NIC2	CB4858	1	46	24	1	20662	#CC0000	2453905988	TRUE	NIC2	TRUE	276	9159000	15037759	0.6090668164052901	0	7800462	0.5187250307708748	TRUE	0.9999	C	1e-5	1e-5	0.9999	1e-5	1e-5	1e-5	1e-5	1e-5	1e-5	1e-5	1e-5	FALSE
I	1660874	1750821	ED3048	CB4858	0.9	46	25	4	89947	#CC0B00	150684368	FALSE	NIC2	TRUE	276	9159000	15037759	0.6090668164052901	0	7800462	0.5187250307708748	TRUE	0.9999	C	1e-5	1e-5	0.9999	1e-5	1e-5	1e-5	1e-5	1e-5	1e-5	1e-5	1e-5	FALSE
I	1750821	1781567	NIC2	CB4858	1	46	26	1	30746	#CC0000	2453905988	TRUE	NIC2	TRUE	276	9159000	15037759	0.6090668164052901	0	7800462	0.5187250307708748	TRUE	0.9999	C	1e-5	1e-5	0.9999	1e-5	1e-5	1e-5	1e-5	1e-5	1e-5	1e-5	1e-5	FALSE
I	1781567	1825779	ED3048	CB4858	0.9	46	27	4	44212	#CC0B00	150684368	FALSE	NIC2	TRUE	276	9159000	15037759	0.6090668164052901	0	7800462	0.5187250307708748	TRUE	0.9999	C	1e-5	1e-5	0.9999	1e-5	1e-5	1e-5	1e-5	1e-5	1e-5	1e-5	1e-5	FALSE
I	1825779	1829697	NIC2	CB4858	1	46	28	1	3918	#CC0000	2453905988	TRUE	NIC2	TRUE	276	9159000	15037759	0.6090668164052901	0	7800462	0.5187250307708748	TRUE	0.9999	C	1e-5	1e-5	0.9999	1e-5	1e-5	1e-5	1e-5	1e-5	1e-5	1e-5	1e-5	FALSE
I	1829697	1851727	ED3048	CB4858	0.9	46	29	4	22030	#CC0B00	150684368	FALSE	NIC2	TRUE	276	9159000	15037759	0.6090668164052901	0	7800462	0.5187250307708748	TRUE	0.9999	C	1e-5	1e-5	0.9999	1e-5	1e-5	1e-5	1e-5	1e-5	1e-5	1e-5	1e-5	FALSE
I	1851727	1874368	NIC2	CB4858	1	46	30	1	22641	#CC0000	2453905988	TRUE	NIC2	TRUE	276	9159000	15037759	0.6090668164052901	0	7800462	0.5187250307708748	TRUE	0.9999	C	1e-5	1e-5	0.9999	1e-5	1e-5	1e-5	1e-5	1e-5	1e-5	1e-5	1e-5	FALSE
I	1874368	1881920	ED3048	CB4858	0.9	46	31	4	7552	#CC0B00	150684368	FALSE	NIC2	TRUE	276	9159000	15037759	0.6090668164052901	0	7800462	0.5187250307708748	TRUE	0.9999	C	1e-5	1e-5	0.9999	1e-5	1e-5	1e-5	1e-5	1e-5	1e-5	1e-5	1e-5	FALSE
I	1881920	1913957	NIC2	CB4858	1	46	32	1	32037	#CC0000	2453905988	TRUE	NIC2	TRUE	276	9159000	15037759	0.6090668164052901	0	7800462	0.5187250307708748	TRUE	0.9999	C	1e-5	1e-5	0.9999	1e-5	1e-5	1e-5	1e-5	1e-5	1e-5	1e-5	1e-5	FALSE
I	1913957	1922747	ED3048	CB4858	0.9	46	33	4	8790	#CC0B00	150684368	FALSE	NIC2	TRUE	276	9159000	15037759	0.6090668164052901	0	7800462	0.5187250307708748	TRUE	0.9999	C	1e-5	1e-5	0.9999	1e-5	1e-5	1e-5	1e-5	1e-5	1e-5	1e-5	1e-5	FALSE
I	1922747	1974234	NIC2	CB4858	1	46	34	1	51487	#CC0000	2453905988	TRUE	NIC2	TRUE	276	9159000	15037759	0.6090668164052901	0	7800462	0.5187250307708748	TRUE	0.9999	C	1e-5	1e-5	0.9999	1e-5	1e-5	1e-5	1e-5	1e-5	1e-5	1e-5	1e-5	FALSE
I	1974234	1981352	ED3048	CB4858	0.9	46	35	4	7118	#CC0B00	150684368	FALSE	NIC2	TRUE	276	9159000	15037759	0.6090668164052901	0	7800462	0.5187250307708748	TRUE	0.9999	C	1e-5	1e-5	0.9999	1e-5	1e-5	1e-5	1e-5	1e-5	1e-5	1e-5	1e-5	FALSE
I	1981352	2040543	NIC2	CB4858	1	46	36	1	59191	#CC0000	2453905988	TRUE	NIC2	TRUE	276	9159000	15037759	0.6090668164052901	0	7800462	0.5187250307708748	TRUE	0.9999	C	1e-5	1e-5	0.9999	1e-5	1e-5	1e-5	1e-5	1e-5	1e-5	1e-5	1e-5	FALSE
I	2040543	2161780	ED3048	CB4858	0.9	46	37	4	121237	#CC0B00	150684368	FALSE	NIC2	TRUE	276	9159000	15037759	0.6090668164052901	0	7800462	0.5187250307708748	TRUE	0.9999	C	1e-5	1e-5	0.9999	1e-5	1e-5	1e-5	1e-5	1e-5	1e-5	1e-5	1e-5	FALSE
I	2161780	2176348	NIC2	CB4858	1	46	38	1	14568	#CC0000	2453905988	TRUE	NIC2	TRUE	276	9159000	15037759	0.6090668164052901	0	7800462	0.5187250307708748	TRUE	0.9999	C	1e-5	1e-5	0.9999	1e-5	1e-5	1e-5	1e-5	1e-5	1e-5	1e-5	1e-5	FALSE
I	2176348	2190339	ED3048	CB4858	0.9	46	39	4	13991	#CC0B00	150684368	FALSE	NIC2	TRUE	276	9159000	15037759	0.6090668164052901	0	7800462	0.5187250307708748	TRUE	0.9999	C	1e-5	1e-5	0.9999	1e-5	1e-5	1e-5	1e-5	1e-5	1e-5	1e-5	1e-5	FALSE
I	2190339	2204010	NIC2	CB4858	1	46	40	1	13671	#CC0000	2453905988	TRUE	NIC2	TRUE	276	9159000	15037759	0.6090668164052901	0	7800462	0.5187250307708748	TRUE	0.9999	C	1e-5	1e-5	0.9999	1e-5	1e-5	1e-5	1e-5	1e-5	1e-5	1e-5	1e-5	FALSE
I	2204010	2465076	ED3048	CB4858	0.9	46	41	4	261066	#CC0B00	150684368	FALSE	NIC2	TRUE	276	9159000	15037759	0.6090668164052901	0	7800462	0.5187250307708748	TRUE	0.9999	C	1e-5	1e-5	0.9999	1e-5	1e-5	1e-5	1e-5	1e-5	1e-5	1e-5	1e-5	FALSE
I	2465076	2468912	NIC2	CB4858	1	46	42	1	3836	#CC0000	2453905988	TRUE	NIC2	TRUE	276	9159000	15037759	0.6090668164052901	0	7800462	0.5187250307708748	TRUE	0.9999	C	1e-5	1e-5	0.9999	1e-5	1e-5	1e-5	1e-5	1e-5	1e-5	1e-5	1e-5	FALSE
I	2468912	2500102	ED3048	CB4858	0.9	46	43	4	31190	#CC0B00	150684368	FALSE	NIC2	TRUE	276	9159000	15037759	0.6090668164052901	0	7800462	0.5187250307708748	TRUE	0.9999	C	1e-5	1e-5	0.9999	1e-5	1e-5	1e-5	1e-5	1e-5	1e-5	1e-5	1e-5	FALSE
I	2500102	2513751	NIC2	CB4858	1	46	44	1	13649	#CC0000	2453905988	TRUE	NIC2	TRUE	276	9159000	15037759	0.6090668164052901	0	7800462	0.5187250307708748	TRUE	0.9999	C	1e-5	1e-5	0.9999	1e-5	1e-5	1e-5	1e-5	1e-5	1e-5	1e-5	1e-5	FALSE
I	2513751	2576070	ED3048	CB4858	0.9	46	45	4	62319	#CC0B00	150684368	FALSE	NIC2	TRUE	276	9159000	15037759	0.6090668164052901	0	7800462	0.5187250307708748	TRUE	0.9999	C	1e-5	1e-5	0.9999	1e-5	1e-5	1e-5	1e-5	1e-5	1e-5	1e-5	1e-5	FALSE
I	2576070	2785019	NIC2	CB4858	1	46	46	1	208949	#CC0000	2453905988	TRUE	NIC2	TRUE	276	9159000	15037759	0.6090668164052901	0	7800462	0.5187250307708748	TRUE	0.9999	C	1e-5	1e-5	0.9999	1e-5	1e-5	1e-5	1e-5	1e-5	1e-5	1e-5	1e-5	FALSE
I	2785019	2864069	ED3048	CB4858	0.9	46	47	4	79050	#CC0B00	150684368	FALSE	NIC2	TRUE	276	9159000	15037759	0.6090668164052901	0	7800462	0.5187250307708748	TRUE	0.9999	C	1e-5	1e-5	0.9999	1e-5	1e-5	1e-5	1e-5	1e-5	1e-5	1e-5	1e-5	FALSE
I	2864069	2866511	NIC2	CB4858	1	46	48	1	2442	#CC0000	2453905988	TRUE	NIC2	TRUE	276	9159000	15037759	0.6090668164052901	0	7800462	0.5187250307708748	TRUE	0.9999	C	1e-5	1e-5	0.9999	1e-5	1e-5	1e-5	1e-5	1e-5	1e-5	1e-5	1e-5	FALSE
I	2866511	2867958	ED3048	CB4858	0.9	46	49	4	1447	#CC0B00	150684368	FALSE	NIC2	TRUE	276	9159000	15037759	0.6090668164052901	0	7800462	0.5187250307708748	TRUE	0.9999	C	1e-5	1e-5	0.9999	1e-5	1e-5	1e-5	1e-5	1e-5	1e-5	1e-5	1e-5	FALSE
I	2867958	2886099	NIC2	CB4858	1	46	50	1	18141	#CC0000	2453905988	TRUE	NIC2	TRUE	276	9159000	15037759	0.6090668164052901	0	7800462	0.5187250307708748	TRUE	0.9999	C	1e-5	1e-5	0.9999	1e-5	1e-5	1e-5	1e-5	1e-5	1e-5	1e-5	1e-5	FALSE
I	2886099	2936666	EG4946	CB4858	1	46	51	19	50567	#CC4400	33166819	FALSE	NIC2	TRUE	276	9159000	15037759	0.6090668164052901	0	7800462	0.5187250307708748	TRUE	0.9999	C	1e-5	1e-5	0.9999	1e-5	1e-5	1e-5	1e-5	1e-5	1e-5	1e-5	1e-5	FALSE
I	2936666	3018467	NIC2	CB4858	1	46	52	1	81801	#CC0000	2453905988	TRUE	NIC2	TRUE	276	9159000	15037759	0.6090668164052901	0	7800462	0.5187250307708748	TRUE	0.9999	C	1e-5	1e-5	0.9999	1e-5	1e-5	1e-5	1e-5	1e-5	1e-5	1e-5	1e-5	FALSE
I	3018467	3046978	EG4946	CB4858	1	46	53	19	28511	#CC4400	33166819	FALSE	NIC2	TRUE	276	9159000	15037759	0.6090668164052901	0	7800462	0.5187250307708748	TRUE	0.9999	C	1e-5	1e-5	0.9999	1e-5	1e-5	1e-5	1e-5	1e-5	1e-5	1e-5	1e-5	FALSE
I	3046978	3047977	NIC2	CB4858	1	46	54	1	999	#CC0000	2453905988	TRUE	NIC2	TRUE	276	9159000	15037759	0.6090668164052901	0	7800462	0.5187250307708748	TRUE	0.9999	C	1e-5	1e-5	0.9999	1e-5	1e-5	1e-5	1e-5	1e-5	1e-5	1e-5	1e-5	FALSE
I	3047977	3064995	EG4946	CB4858	1	46	55	19	17018	#CC4400	33166819	FALSE	NIC2	TRUE	276	9159000	15037759	0.6090668164052901	0	7800462	0.5187250307708748	TRUE	0.9999	C	1e-5	1e-5	0.9999	1e-5	1e-5	1e-5	1e-5	1e-5	1e-5	1e-5	1e-5	FALSE
I	3064995	3104790	NIC2	CB4858	1	46	56	1	39795	#CC0000	2453905988	TRUE	NIC2	TRUE	276	9159000	15037759	0.6090668164052901	0	7800462	0.5187250307708748	TRUE	0.9999	C	1e-5	1e-5	0.9999	1e-5	1e-5	1e-5	1e-5	1e-5	1e-5	1e-5	1e-5	FALSE
I	3104790	3410583	EG4946	CB4858	1	46	57	19	305793	#CC4400	33166819	FALSE	NIC2	TRUE	276	9159000	15037759	0.6090668164052901	0	7800462	0.5187250307708748	TRUE	0.9999	C	1e-5	1e-5	0.9999	1e-5	1e-5	1e-5	1e-5	1e-5	1e-5	1e-5	1e-5	FALSE
I	3410583	3421647	NIC2	CB4858	1	46	58	1	11064	#CC0000	2453905988	TRUE	NIC2	TRUE	276	9159000	15037759	0.6090668164052901	0	7800462	0.5187250307708748	TRUE	0.9999	C	1e-5	1e-5	0.9999	1e-5	1e-5	1e-5	1e-5	1e-5	1e-5	1e-5	1e-5	FALSE
I	3421647	3559173	EG4946	CB4858	1	46	59	19	137526	#CC4400	33166819	FALSE	NIC2	TRUE	276	9159000	15037759	0.6090668164052901	0	7800462	0.5187250307708748	TRUE	0.9999	C	1e-5	1e-5	0.9999	1e-5	1e-5	1e-5	1e-5	1e-5	1e-5	1e-5	1e-5	FALSE
I	3559173	3585161	NIC2	CB4858	1	46	60	1	25988	#CC0000	2453905988	TRUE	NIC2	TRUE	276	9159000	15037759	0.6090668164052901	0	7800462	0.5187250307708748	TRUE	0.9999	C	1e-5	1e-5	0.9999	1e-5	1e-5	1e-5	1e-5	1e-5	1e-5	1e-5	1e-5	FALSE
I	3585161	4360210	EG4946	CB4858	1	46	61	19	775049	#CC4400	33166819	FALSE	NIC2	TRUE	276	9159000	15037759	0.6090668164052901	0	7800462	0.5187250307708748	TRUE	0.9999	C	1e-5	1e-5	0.9999	1e-5	1e-5	1e-5	1e-5	1e-5	1e-5	1e-5	1e-5	FALSE
I	4360210	9946989	NIC2	CB4858	1	46	62	1	5586779	#CC0000	2453905988	TRUE	NIC2	TRUE	276	9159000	15037759	0.6090668164052901	5586779	7800462	0.5187250307708748	TRUE	0.9999	C	1e-5	1e-5	0.9999	1e-5	1e-5	1e-5	1e-5	1e-5	1e-5	1e-5	1e-5	FALSE
I	9946989	10351020	EG4347	CB4858	1	46	63	5	404031	#FF1300	122541644	FALSE	NIC2	TRUE	276	9159000	15037759	0.6090668164052901	0	7800462	0.5187250307708748	TRUE	0.9999	C	1e-5	1e-5	0.9999	1e-5	1e-5	1e-5	1e-5	1e-5	1e-5	1e-5	1e-5	FALSE
I	10351020	10354853	NIC2	CB4858	1	46	64	1	3833	#CC0000	2453905988	TRUE	NIC2	TRUE	276	9159000	15037759	0.6090668164052901	0	7800462	0.5187250307708748	TRUE	0.9999	C	1e-5	1e-5	0.9999	1e-5	1e-5	1e-5	1e-5	1e-5	1e-5	1e-5	1e-5	FALSE
I	10354853	10634911	EG4347	CB4858	1	46	65	5	280058	#FF1300	122541644	FALSE	NIC2	TRUE	276	9159000	15037759	0.6090668164052901	0	7800462	0.5187250307708748	TRUE	0.9999	C	1e-5	1e-5	0.9999	1e-5	1e-5	1e-5	1e-5	1e-5	1e-5	1e-5	1e-5	FALSE
I	10634911	10639190	NIC2	CB4858	1	46	66	1	4279	#CC0000	2453905988	TRUE	NIC2	TRUE	276	9159000	15037759	0.6090668164052901	0	7800462	0.5187250307708748	TRUE	0.9999	C	1e-5	1e-5	0.9999	1e-5	1e-5	1e-5	1e-5	1e-5	1e-5	1e-5	1e-5	FALSE
I	10639190	10883065	EG4347	CB4858	1	46	67	5	243875	#FF1300	122541644	FALSE	NIC2	TRUE	276	9159000	15037759	0.6090668164052901	0	7800462	0.5187250307708748	TRUE	0.9999	C	1e-5	1e-5	0.9999	1e-5	1e-5	1e-5	1e-5	1e-5	1e-5	1e-5	1e-5	FALSE
I	10883065	10908578	NIC2	CB4858	1	46	68	1	25513	#CC0000	2453905988	TRUE	NIC2	TRUE	276	9159000	15037759	0.6090668164052901	0	7800462	0.5187250307708748	TRUE	0.9999	C	1e-5	1e-5	0.9999	1e-5	1e-5	1e-5	1e-5	1e-5	1e-5	1e-5	1e-5	FALSE
I	10908578	11396234	EG4347	CB4858	1	46	69	5	487656	#FF1300	122541644	FALSE	NIC2	TRUE	276	9159000	15037759	0.6090668164052901	0	7800462	0.5187250307708748	TRUE	0.9999	C	1e-5	1e-5	0.9999	1e-5	1e-5	1e-5	1e-5	1e-5	1e-5	1e-5	1e-5	FALSE
I	11396234	11460051	NIC2	CB4858	1	46	70	1	63817	#CC0000	2453905988	TRUE	NIC2	TRUE	276	9159000	15037759	0.6090668164052901	0	7800462	0.5187250307708748	TRUE	0.9999	C	1e-5	1e-5	0.9999	1e-5	1e-5	1e-5	1e-5	1e-5	1e-5	1e-5	1e-5	FALSE
I	11460051	11503320	EG4347	CB4858	1	46	71	5	43269	#FF1300	122541644	FALSE	NIC2	TRUE	276	9159000	15037759	0.6090668164052901	0	7800462	0.5187250307708748	TRUE	0.9999	C	1e-5	1e-5	0.9999	1e-5	1e-5	1e-5	1e-5	1e-5	1e-5	1e-5	1e-5	FALSE
I	11503320	11551724	NIC2	CB4858	1	46	72	1	48404	#CC0000	2453905988	TRUE	NIC2	TRUE	276	9159000	15037759	0.6090668164052901	0	7800462	0.5187250307708748	TRUE	0.9999	C	1e-5	1e-5	0.9999	1e-5	1e-5	1e-5	1e-5	1e-5	1e-5	1e-5	1e-5	FALSE
I	11551724	12236997	EG4347	CB4858	1	46	73	5	685273	#FF1300	122541644	FALSE	NIC2	TRUE	276	9159000	15037759	0.6090668164052901	0	7800462	0.5187250307708748	TRUE	0.9999	C	1e-5	1e-5	0.9999	1e-5	1e-5	1e-5	1e-5	1e-5	1e-5	1e-5	1e-5	FALSE
I	12236997	12435701	NIC2	CB4858	1	46	74	1	198704	#CC0000	2453905988	TRUE	NIC2	TRUE	276	9159000	15037759	0.6090668164052901	0	7800462	0.5187250307708748	TRUE	0.9999	C	1e-5	1e-5	0.9999	1e-5	1e-5	1e-5	1e-5	1e-5	1e-5	1e-5	1e-5	FALSE
I	12435701	12618732	EG4347	CB4858	1	46	75	5	183031	#FF1300	122541644	FALSE	NIC2	TRUE	276	9159000	15037759	0.6090668164052901	0	7800462	0.5187250307708748	TRUE	0.9999	C	1e-5	1e-5	0.9999	1e-5	1e-5	1e-5	1e-5	1e-5	1e-5	1e-5	1e-5	FALSE
I	12618732	14832415	NIC2	CB4858	1	46	76	1	2213683	#CC0000	2453905988	TRUE	NIC2	TRUE	276	9159000	15037759	0.6090668164052901	2213683	7800462	0.5187250307708748	TRUE	0.9999	C	1e-5	1e-5	0.9999	1e-5	1e-5	1e-5	1e-5	1e-5	1e-5	1e-5	1e-5	FALSE
I	14832415	15041422	CX11271	CB4858	1	46	77	23	209007	#FF6800	5445413	FALSE	NIC2	TRUE	276	9159000	15037759	0.6090668164052901	0	7800462	0.5187250307708748	TRUE	0.9999	C	1e-5	1e-5	0.9999	1e-5	1e-5	1e-5	1e-5	1e-5	1e-5	1e-5	1e-5	FALSE
I	3663	13368358	NIC2	CB4932	1	91	1	1	13364695	#CC0000	2453905988	TRUE	NIC2	TRUE	276	13652391	15037759	0.9078740389442337	13364695	13364695	0.8887424648845615	TRUE	0.604814	B	1.9e-5	0.604814	1e-5	1e-5	1e-5	1e-5	1e-5	1.1e-5	0.395086	1e-5	1e-5	FALSE
I	13368358	13952112	AB1	CB4932	1	91	2	35	583754	#FFA000	12133383	FALSE	NIC2	TRUE	276	13652391	15037759	0.9078740389442337	0	13364695	0.8887424648845615	TRUE	0.604814	B	1.9e-5	0.604814	1e-5	1e-5	1e-5	1e-5	1e-5	1.1e-5	0.395086	1e-5	1e-5	FALSE
I	13952112	13952820	NIC2	CB4932	1	91	3	1	708	#CC0000	2453905988	TRUE	NIC2	TRUE	276	13652391	15037759	0.9078740389442337	0	13364695	0.8887424648845615	TRUE	0.604814	B	1.9e-5	0.604814	1e-5	1e-5	1e-5	1e-5	1e-5	1.1e-5	0.395086	1e-5	1e-5	FALSE
I	13952820	13953879	AB1	CB4932	1	91	4	35	1059	#FFA000	12133383	FALSE	NIC2	TRUE	276	13652391	15037759	0.9078740389442337	0	13364695	0.8887424648845615	TRUE	0.604814	B	1.9e-5	0.604814	1e-5	1e-5	1e-5	1e-5	1e-5	1.1e-5	0.395086	1e-5	1e-5	FALSE
I	13953879	14146937	NIC2	CB4932	1	91	5	1	193058	#CC0000	2453905988	TRUE	NIC2	TRUE	276	13652391	15037759	0.9078740389442337	0	13364695	0.8887424648845615	TRUE	0.604814	B	1.9e-5	0.604814	1e-5	1e-5	1e-5	1e-5	1e-5	1.1e-5	0.395086	1e-5	1e-5	FALSE
I	14146937	14402658	PX179	CB4932	0.9	91	6	6	255721	#FF7466	26998152	FALSE	NIC2	TRUE	276	13652391	15037759	0.9078740389442337	0	13364695	0.8887424648845615	TRUE	0.604814	B	1.9e-5	0.604814	1e-5	1e-5	1e-5	1e-5	1e-5	1.1e-5	0.395086	1e-5	1e-5	FALSE
I	14402658	14496588	NIC2	CB4932	1	91	7	1	93930	#CC0000	2453905988	TRUE	NIC2	TRUE	276	13652391	15037759	0.9078740389442337	0	13364695	0.8887424648845615	TRUE	0.604814	B	1.9e-5	0.604814	1e-5	1e-5	1e-5	1e-5	1e-5	1.1e-5	0.395086	1e-5	1e-5	FALSE
I	14496588	15041422	PX179	CB4932	0.9	91	8	6	544834	#FF7466	26998152	FALSE	NIC2	TRUE	276	13652391	15037759	0.9078740389442337	0	13364695	0.8887424648845615	TRUE	0.604814	B	1.9e-5	0.604814	1e-5	1e-5	1e-5	1e-5	1e-5	1.1e-5	0.395086	1e-5	1e-5	FALSE
I	3663	93212	BRC20067	CX11254	0.9	184	1	24	89549	#FFA766	268647	FALSE	NIC2	TRUE	276	10616964	15037759	0.7060203584855962	0	9286666	0.6175565122436129	TRUE	0.656296	C	1e-5	1e-5	0.656296	1e-5	1e-5	1e-5	1e-5	1e-5	1e-5	0.237537	0.106087	FALSE
I	93212	448892	QG536	CX11254	1	184	2	7	355680	#CC1700	59985814	FALSE	NIC2	TRUE	276	10616964	15037759	0.7060203584855962	0	9286666	0.6175565122436129	TRUE	0.656296	C	1e-5	1e-5	0.656296	1e-5	1e-5	1e-5	1e-5	1e-5	1e-5	0.237537	0.106087	FALSE
I	448892	528414	ED3048	CX11254	0.9	184	3	4	79522	#CC0B00	150684368	FALSE	NIC2	TRUE	276	10616964	15037759	0.7060203584855962	0	9286666	0.6175565122436129	TRUE	0.656296	C	1e-5	1e-5	0.656296	1e-5	1e-5	1e-5	1e-5	1e-5	1e-5	0.237537	0.106087	FALSE
I	528414	835064	QG536	CX11254	1	184	4	7	306650	#CC1700	59985814	FALSE	NIC2	TRUE	276	10616964	15037759	0.7060203584855962	0	9286666	0.6175565122436129	TRUE	0.656296	C	1e-5	1e-5	0.656296	1e-5	1e-5	1e-5	1e-5	1e-5	1e-5	0.237537	0.106087	FALSE
I	835064	843028	ED3048	CX11254	0.9	184	5	4	7964	#CC0B00	150684368	FALSE	NIC2	TRUE	276	10616964	15037759	0.7060203584855962	0	9286666	0.6175565122436129	TRUE	0.656296	C	1e-5	1e-5	0.656296	1e-5	1e-5	1e-5	1e-5	1e-5	1e-5	0.237537	0.106087	FALSE
I	843028	844068	QG536	CX11254	1	184	6	7	1040	#CC1700	59985814	FALSE	NIC2	TRUE	276	10616964	15037759	0.7060203584855962	0	9286666	0.6175565122436129	TRUE	0.656296	C	1e-5	1e-5	0.656296	1e-5	1e-5	1e-5	1e-5	1e-5	1e-5	0.237537	0.106087	FALSE
I	844068	864435	NIC2	CX11254	1	184	7	1	20367	#CC0000	2453905988	TRUE	NIC2	TRUE	276	10616964	15037759	0.7060203584855962	0	9286666	0.6175565122436129	TRUE	0.656296	C	1e-5	1e-5	0.656296	1e-5	1e-5	1e-5	1e-5	1e-5	1e-5	0.237537	0.106087	FALSE
I	864435	1017980	QG536	CX11254	1	184	8	7	153545	#CC1700	59985814	FALSE	NIC2	TRUE	276	10616964	15037759	0.7060203584855962	0	9286666	0.6175565122436129	TRUE	0.656296	C	1e-5	1e-5	0.656296	1e-5	1e-5	1e-5	1e-5	1e-5	1e-5	0.237537	0.106087	FALSE
I	1017980	1049837	NIC2	CX11254	1	184	9	1	31857	#CC0000	2453905988	TRUE	NIC2	TRUE	276	10616964	15037759	0.7060203584855962	0	9286666	0.6175565122436129	TRUE	0.656296	C	1e-5	1e-5	0.656296	1e-5	1e-5	1e-5	1e-5	1e-5	1e-5	0.237537	0.106087	FALSE
I	1049837	1091061	QG536	CX11254	1	184	10	7	41224	#CC1700	59985814	FALSE	NIC2	TRUE	276	10616964	15037759	0.7060203584855962	0	9286666	0.6175565122436129	TRUE	0.656296	C	1e-5	1e-5	0.656296	1e-5	1e-5	1e-5	1e-5	1e-5	1e-5	0.237537	0.106087	FALSE
I	1091061	1136414	NIC2	CX11254	1	184	11	1	45353	#CC0000	2453905988	TRUE	NIC2	TRUE	276	10616964	15037759	0.7060203584855962	0	9286666	0.6175565122436129	TRUE	0.656296	C	1e-5	1e-5	0.656296	1e-5	1e-5	1e-5	1e-5	1e-5	1e-5	0.237537	0.106087	FALSE
I	1136414	1150297	QG536	CX11254	1	184	12	7	13883	#CC1700	59985814	FALSE	NIC2	TRUE	276	10616964	15037759	0.7060203584855962	0	9286666	0.6175565122436129	TRUE	0.656296	C	1e-5	1e-5	0.656296	1e-5	1e-5	1e-5	1e-5	1e-5	1e-5	0.237537	0.106087	FALSE
I	1150297	1175482	ED3048	CX11254	0.9	184	13	4	25185	#CC0B00	150684368	FALSE	NIC2	TRUE	276	10616964	15037759	0.7060203584855962	0	9286666	0.6175565122436129	TRUE	0.656296	C	1e-5	1e-5	0.656296	1e-5	1e-5	1e-5	1e-5	1e-5	1e-5	0.237537	0.106087	FALSE
I	1175482	1182670	QG536	CX11254	1	184	14	7	7188	#CC1700	59985814	FALSE	NIC2	TRUE	276	10616964	15037759	0.7060203584855962	0	9286666	0.6175565122436129	TRUE	0.656296	C	1e-5	1e-5	0.656296	1e-5	1e-5	1e-5	1e-5	1e-5	1e-5	0.237537	0.106087	FALSE
I	1182670	1190482	ED3048	CX11254	0.9	184	15	4	7812	#CC0B00	150684368	FALSE	NIC2	TRUE	276	10616964	15037759	0.7060203584855962	0	9286666	0.6175565122436129	TRUE	0.656296	C	1e-5	1e-5	0.656296	1e-5	1e-5	1e-5	1e-5	1e-5	1e-5	0.237537	0.106087	FALSE
I	1190482	1242553	NIC2	CX11254	1	184	16	1	52071	#CC0000	2453905988	TRUE	NIC2	TRUE	276	10616964	15037759	0.7060203584855962	0	9286666	0.6175565122436129	TRUE	0.656296	C	1e-5	1e-5	0.656296	1e-5	1e-5	1e-5	1e-5	1e-5	1e-5	0.237537	0.106087	FALSE
I	1242553	1344494	ED3048	CX11254	0.9	184	17	4	101941	#CC0B00	150684368	FALSE	NIC2	TRUE	276	10616964	15037759	0.7060203584855962	0	9286666	0.6175565122436129	TRUE	0.656296	C	1e-5	1e-5	0.656296	1e-5	1e-5	1e-5	1e-5	1e-5	1e-5	0.237537	0.106087	FALSE
I	1344494	1420764	NIC2	CX11254	1	184	18	1	76270	#CC0000	2453905988	TRUE	NIC2	TRUE	276	10616964	15037759	0.7060203584855962	0	9286666	0.6175565122436129	TRUE	0.656296	C	1e-5	1e-5	0.656296	1e-5	1e-5	1e-5	1e-5	1e-5	1e-5	0.237537	0.106087	FALSE
I	1420764	1486678	ED3048	CX11254	0.9	184	19	4	65914	#CC0B00	150684368	FALSE	NIC2	TRUE	276	10616964	15037759	0.7060203584855962	0	9286666	0.6175565122436129	TRUE	0.656296	C	1e-5	1e-5	0.656296	1e-5	1e-5	1e-5	1e-5	1e-5	1e-5	0.237537	0.106087	FALSE
I	1486678	1492117	NIC2	CX11254	1	184	20	1	5439	#CC0000	2453905988	TRUE	NIC2	TRUE	276	10616964	15037759	0.7060203584855962	0	9286666	0.6175565122436129	TRUE	0.656296	C	1e-5	1e-5	0.656296	1e-5	1e-5	1e-5	1e-5	1e-5	1e-5	0.237537	0.106087	FALSE
I	1492117	1496191	CX11271	CX11254	1	184	21	23	4074	#FF6800	5445413	FALSE	NIC2	TRUE	276	10616964	15037759	0.7060203584855962	0	9286666	0.6175565122436129	TRUE	0.656296	C	1e-5	1e-5	0.656296	1e-5	1e-5	1e-5	1e-5	1e-5	1e-5	0.237537	0.106087	FALSE
I	1496191	1502794	NIC2	CX11254	1	184	22	1	6603	#CC0000	2453905988	TRUE	NIC2	TRUE	276	10616964	15037759	0.7060203584855962	0	9286666	0.6175565122436129	TRUE	0.656296	C	1e-5	1e-5	0.656296	1e-5	1e-5	1e-5	1e-5	1e-5	1e-5	0.237537	0.106087	FALSE
I	1502794	1611652	CX11271	CX11254	1	184	23	23	108858	#FF6800	5445413	FALSE	NIC2	TRUE	276	10616964	15037759	0.7060203584855962	0	9286666	0.6175565122436129	TRUE	0.656296	C	1e-5	1e-5	0.656296	1e-5	1e-5	1e-5	1e-5	1e-5	1e-5	0.237537	0.106087	FALSE
I	1611652	1640212	ED3048	CX11254	0.9	184	24	4	28560	#CC0B00	150684368	FALSE	NIC2	TRUE	276	10616964	15037759	0.7060203584855962	0	9286666	0.6175565122436129	TRUE	0.656296	C	1e-5	1e-5	0.656296	1e-5	1e-5	1e-5	1e-5	1e-5	1e-5	0.237537	0.106087	FALSE
I	1640212	1660874	NIC2	CX11254	1	184	25	1	20662	#CC0000	2453905988	TRUE	NIC2	TRUE	276	10616964	15037759	0.7060203584855962	0	9286666	0.6175565122436129	TRUE	0.656296	C	1e-5	1e-5	0.656296	1e-5	1e-5	1e-5	1e-5	1e-5	1e-5	0.237537	0.106087	FALSE
I	1660874	1664148	ED3048	CX11254	0.9	184	26	4	3274	#CC0B00	150684368	FALSE	NIC2	TRUE	276	10616964	15037759	0.7060203584855962	0	9286666	0.6175565122436129	TRUE	0.656296	C	1e-5	1e-5	0.656296	1e-5	1e-5	1e-5	1e-5	1e-5	1e-5	0.237537	0.106087	FALSE
I	1664148	1704321	MY920	CX11254	0.9	184	27	12	40173	#FF8566	22692122	FALSE	NIC2	TRUE	276	10616964	15037759	0.7060203584855962	0	9286666	0.6175565122436129	TRUE	0.656296	C	1e-5	1e-5	0.656296	1e-5	1e-5	1e-5	1e-5	1e-5	1e-5	0.237537	0.106087	FALSE
I	1704321	1712160	ED3048	CX11254	0.9	184	28	4	7839	#CC0B00	150684368	FALSE	NIC2	TRUE	276	10616964	15037759	0.7060203584855962	0	9286666	0.6175565122436129	TRUE	0.656296	C	1e-5	1e-5	0.656296	1e-5	1e-5	1e-5	1e-5	1e-5	1e-5	0.237537	0.106087	FALSE
I	1712160	1752731	MY920	CX11254	0.9	184	29	12	40571	#FF8566	22692122	FALSE	NIC2	TRUE	276	10616964	15037759	0.7060203584855962	0	9286666	0.6175565122436129	TRUE	0.656296	C	1e-5	1e-5	0.656296	1e-5	1e-5	1e-5	1e-5	1e-5	1e-5	0.237537	0.106087	FALSE
I	1752731	1755383	NIC2	CX11254	1	184	30	1	2652	#CC0000	2453905988	TRUE	NIC2	TRUE	276	10616964	15037759	0.7060203584855962	0	9286666	0.6175565122436129	TRUE	0.656296	C	1e-5	1e-5	0.656296	1e-5	1e-5	1e-5	1e-5	1e-5	1e-5	0.237537	0.106087	FALSE
I	1755383	1791536	MY920	CX11254	0.9	184	31	12	36153	#FF8566	22692122	FALSE	NIC2	TRUE	276	10616964	15037759	0.7060203584855962	0	9286666	0.6175565122436129	TRUE	0.656296	C	1e-5	1e-5	0.656296	1e-5	1e-5	1e-5	1e-5	1e-5	1e-5	0.237537	0.106087	FALSE
I	1791536	1842842	NIC242	CX11254	0.9	184	32	40	51306	#CC9300	23039935	FALSE	NIC2	TRUE	276	10616964	15037759	0.7060203584855962	0	9286666	0.6175565122436129	TRUE	0.656296	C	1e-5	1e-5	0.656296	1e-5	1e-5	1e-5	1e-5	1e-5	1e-5	0.237537	0.106087	FALSE
I	1842842	1845052	NIC275	CX11254	1	184	33	27	2210	#FFB066	13184509	FALSE	NIC2	TRUE	276	10616964	15037759	0.7060203584855962	0	9286666	0.6175565122436129	TRUE	0.656296	C	1e-5	1e-5	0.656296	1e-5	1e-5	1e-5	1e-5	1e-5	1e-5	0.237537	0.106087	FALSE
I	1845052	1851727	NIC242	CX11254	0.9	184	34	40	6675	#CC9300	23039935	FALSE	NIC2	TRUE	276	10616964	15037759	0.7060203584855962	0	9286666	0.6175565122436129	TRUE	0.656296	C	1e-5	1e-5	0.656296	1e-5	1e-5	1e-5	1e-5	1e-5	1e-5	0.237537	0.106087	FALSE
I	1851727	1874368	MY920	CX11254	0.9	184	35	12	22641	#FF8566	22692122	FALSE	NIC2	TRUE	276	10616964	15037759	0.7060203584855962	0	9286666	0.6175565122436129	TRUE	0.656296	C	1e-5	1e-5	0.656296	1e-5	1e-5	1e-5	1e-5	1e-5	1e-5	0.237537	0.106087	FALSE
I	1874368	1882103	NIC277	CX11254	1	184	36	39	7735	#FFD166	16231262	FALSE	NIC2	TRUE	276	10616964	15037759	0.7060203584855962	0	9286666	0.6175565122436129	TRUE	0.656296	C	1e-5	1e-5	0.656296	1e-5	1e-5	1e-5	1e-5	1e-5	1e-5	0.237537	0.106087	FALSE
I	1882103	1988317	NIC2	CX11254	1	184	37	1	106214	#CC0000	2453905988	TRUE	NIC2	TRUE	276	10616964	15037759	0.7060203584855962	0	9286666	0.6175565122436129	TRUE	0.656296	C	1e-5	1e-5	0.656296	1e-5	1e-5	1e-5	1e-5	1e-5	1e-5	0.237537	0.106087	FALSE
I	1988317	1988890	NIC277	CX11254	1	184	38	39	573	#FFD166	16231262	FALSE	NIC2	TRUE	276	10616964	15037759	0.7060203584855962	0	9286666	0.6175565122436129	TRUE	0.656296	C	1e-5	1e-5	0.656296	1e-5	1e-5	1e-5	1e-5	1e-5	1e-5	0.237537	0.106087	FALSE
I	1988890	2007906	NIC2	CX11254	1	184	39	1	19016	#CC0000	2453905988	TRUE	NIC2	TRUE	276	10616964	15037759	0.7060203584855962	0	9286666	0.6175565122436129	TRUE	0.656296	C	1e-5	1e-5	0.656296	1e-5	1e-5	1e-5	1e-5	1e-5	1e-5	0.237537	0.106087	FALSE
I	2007906	2183457	NIC242	CX11254	0.9	184	40	40	175551	#CC9300	23039935	FALSE	NIC2	TRUE	276	10616964	15037759	0.7060203584855962	0	9286666	0.6175565122436129	TRUE	0.656296	C	1e-5	1e-5	0.656296	1e-5	1e-5	1e-5	1e-5	1e-5	1e-5	0.237537	0.106087	FALSE
I	2183457	2183628	NIC275	CX11254	1	184	41	27	171	#FFB066	13184509	FALSE	NIC2	TRUE	276	10616964	15037759	0.7060203584855962	0	9286666	0.6175565122436129	TRUE	0.656296	C	1e-5	1e-5	0.656296	1e-5	1e-5	1e-5	1e-5	1e-5	1e-5	0.237537	0.106087	FALSE
I	2183628	2189422	MY920	CX11254	0.9	184	42	12	5794	#FF8566	22692122	FALSE	NIC2	TRUE	276	10616964	15037759	0.7060203584855962	0	9286666	0.6175565122436129	TRUE	0.656296	C	1e-5	1e-5	0.656296	1e-5	1e-5	1e-5	1e-5	1e-5	1e-5	0.237537	0.106087	FALSE
I	2189422	2190339	ED3048	CX11254	0.9	184	43	4	917	#CC0B00	150684368	FALSE	NIC2	TRUE	276	10616964	15037759	0.7060203584855962	0	9286666	0.6175565122436129	TRUE	0.656296	C	1e-5	1e-5	0.656296	1e-5	1e-5	1e-5	1e-5	1e-5	1e-5	0.237537	0.106087	FALSE
I	2190339	2191480	NIC2	CX11254	1	184	44	1	1141	#CC0000	2453905988	TRUE	NIC2	TRUE	276	10616964	15037759	0.7060203584855962	0	9286666	0.6175565122436129	TRUE	0.656296	C	1e-5	1e-5	0.656296	1e-5	1e-5	1e-5	1e-5	1e-5	1e-5	0.237537	0.106087	FALSE
I	2191480	2199931	NIC242	CX11254	0.9	184	45	40	8451	#CC9300	23039935	FALSE	NIC2	TRUE	276	10616964	15037759	0.7060203584855962	0	9286666	0.6175565122436129	TRUE	0.656296	C	1e-5	1e-5	0.656296	1e-5	1e-5	1e-5	1e-5	1e-5	1e-5	0.237537	0.106087	FALSE
I	2199931	2204010	NIC2	CX11254	1	184	46	1	4079	#CC0000	2453905988	TRUE	NIC2	TRUE	276	10616964	15037759	0.7060203584855962	0	9286666	0.6175565122436129	TRUE	0.656296	C	1e-5	1e-5	0.656296	1e-5	1e-5	1e-5	1e-5	1e-5	1e-5	0.237537	0.106087	FALSE
I	2204010	2264755	ED3048	CX11254	0.9	184	47	4	60745	#CC0B00	150684368	FALSE	NIC2	TRUE	276	10616964	15037759	0.7060203584855962	0	9286666	0.6175565122436129	TRUE	0.656296	C	1e-5	1e-5	0.656296	1e-5	1e-5	1e-5	1e-5	1e-5	1e-5	0.237537	0.106087	FALSE
I	2264755	2276554	NIC242	CX11254	0.9	184	48	40	11799	#CC9300	23039935	FALSE	NIC2	TRUE	276	10616964	15037759	0.7060203584855962	0	9286666	0.6175565122436129	TRUE	0.656296	C	1e-5	1e-5	0.656296	1e-5	1e-5	1e-5	1e-5	1e-5	1e-5	0.237537	0.106087	FALSE
I	2276554	2286306	NIC275	CX11254	1	184	49	27	9752	#FFB066	13184509	FALSE	NIC2	TRUE	276	10616964	15037759	0.7060203584855962	0	9286666	0.6175565122436129	TRUE	0.656296	C	1e-5	1e-5	0.656296	1e-5	1e-5	1e-5	1e-5	1e-5	1e-5	0.237537	0.106087	FALSE
I	2286306	2373196	NIC242	CX11254	0.9	184	50	40	86890	#CC9300	23039935	FALSE	NIC2	TRUE	276	10616964	15037759	0.7060203584855962	0	9286666	0.6175565122436129	TRUE	0.656296	C	1e-5	1e-5	0.656296	1e-5	1e-5	1e-5	1e-5	1e-5	1e-5	0.237537	0.106087	FALSE
I	2373196	2376213	MY920	CX11254	0.9	184	51	12	3017	#FF8566	22692122	FALSE	NIC2	TRUE	276	10616964	15037759	0.7060203584855962	0	9286666	0.6175565122436129	TRUE	0.656296	C	1e-5	1e-5	0.656296	1e-5	1e-5	1e-5	1e-5	1e-5	1e-5	0.237537	0.106087	FALSE
I	2376213	2397107	NIC242	CX11254	0.9	184	52	40	20894	#CC9300	23039935	FALSE	NIC2	TRUE	276	10616964	15037759	0.7060203584855962	0	9286666	0.6175565122436129	TRUE	0.656296	C	1e-5	1e-5	0.656296	1e-5	1e-5	1e-5	1e-5	1e-5	1e-5	0.237537	0.106087	FALSE
I	2397107	2414171	ED3048	CX11254	0.9	184	53	4	17064	#CC0B00	150684368	FALSE	NIC2	TRUE	276	10616964	15037759	0.7060203584855962	0	9286666	0.6175565122436129	TRUE	0.656296	C	1e-5	1e-5	0.656296	1e-5	1e-5	1e-5	1e-5	1e-5	1e-5	0.237537	0.106087	FALSE
I	2414171	2500168	NIC242	CX11254	0.9	184	54	40	85997	#CC9300	23039935	FALSE	NIC2	TRUE	276	10616964	15037759	0.7060203584855962	0	9286666	0.6175565122436129	TRUE	0.656296	C	1e-5	1e-5	0.656296	1e-5	1e-5	1e-5	1e-5	1e-5	1e-5	0.237537	0.106087	FALSE
I	2500168	2523118	NIC2	CX11254	1	184	55	1	22950	#CC0000	2453905988	TRUE	NIC2	TRUE	276	10616964	15037759	0.7060203584855962	0	9286666	0.6175565122436129	TRUE	0.656296	C	1e-5	1e-5	0.656296	1e-5	1e-5	1e-5	1e-5	1e-5	1e-5	0.237537	0.106087	FALSE
I	2523118	2678904	NIC242	CX11254	0.9	184	56	40	155786	#CC9300	23039935	FALSE	NIC2	TRUE	276	10616964	15037759	0.7060203584855962	0	9286666	0.6175565122436129	TRUE	0.656296	C	1e-5	1e-5	0.656296	1e-5	1e-5	1e-5	1e-5	1e-5	1e-5	0.237537	0.106087	FALSE
I	2678904	2699854	NIC2	CX11254	1	184	57	1	20950	#CC0000	2453905988	TRUE	NIC2	TRUE	276	10616964	15037759	0.7060203584855962	0	9286666	0.6175565122436129	TRUE	0.656296	C	1e-5	1e-5	0.656296	1e-5	1e-5	1e-5	1e-5	1e-5	1e-5	0.237537	0.106087	FALSE
I	2699854	2713783	JU1440	CX11254	0.9	184	58	36	13929	#FFC966	16449770	FALSE	NIC2	TRUE	276	10616964	15037759	0.7060203584855962	0	9286666	0.6175565122436129	TRUE	0.656296	C	1e-5	1e-5	0.656296	1e-5	1e-5	1e-5	1e-5	1e-5	1e-5	0.237537	0.106087	FALSE
I	2713783	2785019	NIC2	CX11254	1	184	59	1	71236	#CC0000	2453905988	TRUE	NIC2	TRUE	276	10616964	15037759	0.7060203584855962	0	9286666	0.6175565122436129	TRUE	0.656296	C	1e-5	1e-5	0.656296	1e-5	1e-5	1e-5	1e-5	1e-5	1e-5	0.237537	0.106087	FALSE
I	2785019	2864069	ED3048	CX11254	0.9	184	60	4	79050	#CC0B00	150684368	FALSE	NIC2	TRUE	276	10616964	15037759	0.7060203584855962	0	9286666	0.6175565122436129	TRUE	0.656296	C	1e-5	1e-5	0.656296	1e-5	1e-5	1e-5	1e-5	1e-5	1e-5	0.237537	0.106087	FALSE
I	2864069	2866511	NIC2	CX11254	1	184	61	1	2442	#CC0000	2453905988	TRUE	NIC2	TRUE	276	10616964	15037759	0.7060203584855962	0	9286666	0.6175565122436129	TRUE	0.656296	C	1e-5	1e-5	0.656296	1e-5	1e-5	1e-5	1e-5	1e-5	1e-5	0.237537	0.106087	FALSE
I	2866511	2867958	ED3048	CX11254	0.9	184	62	4	1447	#CC0B00	150684368	FALSE	NIC2	TRUE	276	10616964	15037759	0.7060203584855962	0	9286666	0.6175565122436129	TRUE	0.656296	C	1e-5	1e-5	0.656296	1e-5	1e-5	1e-5	1e-5	1e-5	1e-5	0.237537	0.106087	FALSE
I	2867958	2886099	NIC2	CX11254	1	184	63	1	18141	#CC0000	2453905988	TRUE	NIC2	TRUE	276	10616964	15037759	0.7060203584855962	0	9286666	0.6175565122436129	TRUE	0.656296	C	1e-5	1e-5	0.656296	1e-5	1e-5	1e-5	1e-5	1e-5	1e-5	0.237537	0.106087	FALSE
I	2886099	2936666	EG4946	CX11254	1	184	64	19	50567	#CC4400	33166819	FALSE	NIC2	TRUE	276	10616964	15037759	0.7060203584855962	0	9286666	0.6175565122436129	TRUE	0.656296	C	1e-5	1e-5	0.656296	1e-5	1e-5	1e-5	1e-5	1e-5	1e-5	0.237537	0.106087	FALSE
I	2936666	12223332	NIC2	CX11254	1	184	65	1	9286666	#CC0000	2453905988	TRUE	NIC2	TRUE	276	10616964	15037759	0.7060203584855962	9286666	9286666	0.6175565122436129	TRUE	0.656296	C	1e-5	1e-5	0.656296	1e-5	1e-5	1e-5	1e-5	1e-5	1e-5	0.237537	0.106087	FALSE
I	12223332	12307682	NIC513	CX11254	1	184	66	43	84350	#CC9E00	4340233	FALSE	NIC2	TRUE	276	10616964	15037759	0.7060203584855962	0	9286666	0.6175565122436129	TRUE	0.656296	C	1e-5	1e-5	0.656296	1e-5	1e-5	1e-5	1e-5	1e-5	1e-5	0.237537	0.106087	FALSE
I	12307682	12312796	MY2535	CX11254	0.9	184	67	10	5114	#CC2200	212766310	FALSE	NIC2	TRUE	276	10616964	15037759	0.7060203584855962	0	9286666	0.6175565122436129	TRUE	0.656296	C	1e-5	1e-5	0.656296	1e-5	1e-5	1e-5	1e-5	1e-5	1e-5	0.237537	0.106087	FALSE
I	12312796	12824876	NIC513	CX11254	1	184	68	43	512080	#CC9E00	4340233	FALSE	NIC2	TRUE	276	10616964	15037759	0.7060203584855962	0	9286666	0.6175565122436129	TRUE	0.656296	C	1e-5	1e-5	0.656296	1e-5	1e-5	1e-5	1e-5	1e-5	1e-5	0.237537	0.106087	FALSE
I	12824876	12855952	NIC2	CX11254	1	184	69	1	31076	#CC0000	2453905988	TRUE	NIC2	TRUE	276	10616964	15037759	0.7060203584855962	0	9286666	0.6175565122436129	TRUE	0.656296	C	1e-5	1e-5	0.656296	1e-5	1e-5	1e-5	1e-5	1e-5	1e-5	0.237537	0.106087	FALSE
I	12855952	12863669	NIC513	CX11254	1	184	70	43	7717	#CC9E00	4340233	FALSE	NIC2	TRUE	276	10616964	15037759	0.7060203584855962	0	9286666	0.6175565122436129	TRUE	0.656296	C	1e-5	1e-5	0.656296	1e-5	1e-5	1e-5	1e-5	1e-5	1e-5	0.237537	0.106087	FALSE
I	12863669	13490689	NIC2	CX11254	1	184	71	1	627020	#CC0000	2453905988	TRUE	NIC2	TRUE	276	10616964	15037759	0.7060203584855962	0	9286666	0.6175565122436129	TRUE	0.656296	C	1e-5	1e-5	0.656296	1e-5	1e-5	1e-5	1e-5	1e-5	1e-5	0.237537	0.106087	FALSE
I	13490689	13858291	NIC242	CX11254	0.9	184	72	40	367602	#CC9300	23039935	FALSE	NIC2	TRUE	276	10616964	15037759	0.7060203584855962	0	9286666	0.6175565122436129	TRUE	0.656296	C	1e-5	1e-5	0.656296	1e-5	1e-5	1e-5	1e-5	1e-5	1e-5	0.237537	0.106087	FALSE
I	13858291	13861750	AB1	CX11254	1	184	73	35	3459	#FFA000	12133383	FALSE	NIC2	TRUE	276	10616964	15037759	0.7060203584855962	0	9286666	0.6175565122436129	TRUE	0.656296	C	1e-5	1e-5	0.656296	1e-5	1e-5	1e-5	1e-5	1e-5	1e-5	0.237537	0.106087	FALSE
I	13861750	13870749	NIC242	CX11254	0.9	184	74	40	8999	#CC9300	23039935	FALSE	NIC2	TRUE	276	10616964	15037759	0.7060203584855962	0	9286666	0.6175565122436129	TRUE	0.656296	C	1e-5	1e-5	0.656296	1e-5	1e-5	1e-5	1e-5	1e-5	1e-5	0.237537	0.106087	FALSE
I	13870749	13879936	AB1	CX11254	1	184	75	35	9187	#FFA000	12133383	FALSE	NIC2	TRUE	276	10616964	15037759	0.7060203584855962	0	9286666	0.6175565122436129	TRUE	0.656296	C	1e-5	1e-5	0.656296	1e-5	1e-5	1e-5	1e-5	1e-5	1e-5	0.237537	0.106087	FALSE
I	13879936	14108112	NIC242	CX11254	0.9	184	76	40	228176	#CC9300	23039935	FALSE	NIC2	TRUE	276	10616964	15037759	0.7060203584855962	0	9286666	0.6175565122436129	TRUE	0.656296	C	1e-5	1e-5	0.656296	1e-5	1e-5	1e-5	1e-5	1e-5	1e-5	0.237537	0.106087	FALSE
I	14108112	14109917	NIC2	CX11254	1	184	77	1	1805	#CC0000	2453905988	TRUE	NIC2	TRUE	276	10616964	15037759	0.7060203584855962	0	9286666	0.6175565122436129	TRUE	0.656296	C	1e-5	1e-5	0.656296	1e-5	1e-5	1e-5	1e-5	1e-5	1e-5	0.237537	0.106087	FALSE
I	14109917	14146543	MY2693	CX11254	1	184	78	57	36626	#FAFF66	3121741	FALSE	NIC2	TRUE	276	10616964	15037759	0.7060203584855962	0	9286666	0.6175565122436129	TRUE	0.656296	C	1e-5	1e-5	0.656296	1e-5	1e-5	1e-5	1e-5	1e-5	1e-5	0.237537	0.106087	FALSE
I	14146543	14165861	JT11398	CX11254	0.9	184	79	50	19318	#FFE700	5001544	FALSE	NIC2	TRUE	276	10616964	15037759	0.7060203584855962	0	9286666	0.6175565122436129	TRUE	0.656296	C	1e-5	1e-5	0.656296	1e-5	1e-5	1e-5	1e-5	1e-5	1e-5	0.237537	0.106087	FALSE
I	14165861	14218363	NIC2	CX11254	1	184	80	1	52502	#CC0000	2453905988	TRUE	NIC2	TRUE	276	10616964	15037759	0.7060203584855962	0	9286666	0.6175565122436129	TRUE	0.656296	C	1e-5	1e-5	0.656296	1e-5	1e-5	1e-5	1e-5	1e-5	1e-5	0.237537	0.106087	FALSE
I	14218363	14325195	MY2693	CX11254	1	184	81	57	106832	#FAFF66	3121741	FALSE	NIC2	TRUE	276	10616964	15037759	0.7060203584855962	0	9286666	0.6175565122436129	TRUE	0.656296	C	1e-5	1e-5	0.656296	1e-5	1e-5	1e-5	1e-5	1e-5	1e-5	0.237537	0.106087	FALSE
I	14325195	14383192	PX179	CX11254	0.9	184	82	6	57997	#FF7466	26998152	FALSE	NIC2	TRUE	276	10616964	15037759	0.7060203584855962	0	9286666	0.6175565122436129	TRUE	0.656296	C	1e-5	1e-5	0.656296	1e-5	1e-5	1e-5	1e-5	1e-5	1e-5	0.237537	0.106087	FALSE
I	14383192	14494964	MY2693	CX11254	1	184	83	57	111772	#FAFF66	3121741	FALSE	NIC2	TRUE	276	10616964	15037759	0.7060203584855962	0	9286666	0.6175565122436129	TRUE	0.656296	C	1e-5	1e-5	0.656296	1e-5	1e-5	1e-5	1e-5	1e-5	1e-5	0.237537	0.106087	FALSE
I	14494964	14496588	NIC2	CX11254	1	184	84	1	1624	#CC0000	2453905988	TRUE	NIC2	TRUE	276	10616964	15037759	0.7060203584855962	0	9286666	0.6175565122436129	TRUE	0.656296	C	1e-5	1e-5	0.656296	1e-5	1e-5	1e-5	1e-5	1e-5	1e-5	0.237537	0.106087	FALSE
I	14496588	14506257	NIC514	CX11254	0.9	184	85	20	9669	#FF5A00	7684863	FALSE	NIC2	TRUE	276	10616964	15037759	0.7060203584855962	0	9286666	0.6175565122436129	TRUE	0.656296	C	1e-5	1e-5	0.656296	1e-5	1e-5	1e-5	1e-5	1e-5	1e-5	0.237537	0.106087	FALSE
I	14506257	14579706	NIC2	CX11254	1	184	86	1	73449	#CC0000	2453905988	TRUE	NIC2	TRUE	276	10616964	15037759	0.7060203584855962	0	9286666	0.6175565122436129	TRUE	0.656296	C	1e-5	1e-5	0.656296	1e-5	1e-5	1e-5	1e-5	1e-5	1e-5	0.237537	0.106087	FALSE
I	14579706	14591450	NIC514	CX11254	0.9	184	87	20	11744	#FF5A00	7684863	FALSE	NIC2	TRUE	276	10616964	15037759	0.7060203584855962	0	9286666	0.6175565122436129	TRUE	0.656296	C	1e-5	1e-5	0.656296	1e-5	1e-5	1e-5	1e-5	1e-5	1e-5	0.237537	0.106087	FALSE
I	14591450	14606829	NIC2	CX11254	1	184	88	1	15379	#CC0000	2453905988	TRUE	NIC2	TRUE	276	10616964	15037759	0.7060203584855962	0	9286666	0.6175565122436129	TRUE	0.656296	C	1e-5	1e-5	0.656296	1e-5	1e-5	1e-5	1e-5	1e-5	1e-5	0.237537	0.106087	FALSE
I	14606829	15041422	NIC514	CX11254	0.9	184	89	20	434593	#FF5A00	7684863	FALSE	NIC2	TRUE	276	10616964	15037759	0.7060203584855962	0	9286666	0.6175565122436129	TRUE	0.656296	C	1e-5	1e-5	0.656296	1e-5	1e-5	1e-5	1e-5	1e-5	1e-5	0.237537	0.106087	FALSE
I	3663	125090	CX11315	CX11262	0.9	214	1	142	121427	#00CC7C	1920943	FALSE	NIC2	TRUE	276	4744941	15037759	0.3155351139754268	0	1696265	0.11280038468497866	TRUE	0.9999	C	1e-5	1e-5	0.9999	1e-5	1e-5	1e-5	1e-5	1e-5	1e-5	1e-5	1e-5	FALSE
I	125090	874281	ED3048	CX11262	0.9	214	2	4	749191	#CC0B00	150684368	FALSE	NIC2	TRUE	276	4744941	15037759	0.3155351139754268	0	1696265	0.11280038468497866	TRUE	0.9999	C	1e-5	1e-5	0.9999	1e-5	1e-5	1e-5	1e-5	1e-5	1e-5	1e-5	1e-5	FALSE
I	874281	880171	NIC515	CX11262	1	214	3	55	5890	#CCCC00	3080288	FALSE	NIC2	TRUE	276	4744941	15037759	0.3155351139754268	0	1696265	0.11280038468497866	TRUE	0.9999	C	1e-5	1e-5	0.9999	1e-5	1e-5	1e-5	1e-5	1e-5	1e-5	1e-5	1e-5	FALSE
I	880171	1051922	JU2866	CX11262	1	214	4	137	171751	#00FF83	6107741	FALSE	NIC2	TRUE	276	4744941	15037759	0.3155351139754268	0	1696265	0.11280038468497866	TRUE	0.9999	C	1e-5	1e-5	0.9999	1e-5	1e-5	1e-5	1e-5	1e-5	1e-5	1e-5	1e-5	FALSE
I	1051922	1091061	QG536	CX11262	1	214	5	7	39139	#CC1700	59985814	FALSE	NIC2	TRUE	276	4744941	15037759	0.3155351139754268	0	1696265	0.11280038468497866	TRUE	0.9999	C	1e-5	1e-5	0.9999	1e-5	1e-5	1e-5	1e-5	1e-5	1e-5	1e-5	1e-5	FALSE
I	1091061	1136414	NIC2	CX11262	1	214	6	1	45353	#CC0000	2453905988	TRUE	NIC2	TRUE	276	4744941	15037759	0.3155351139754268	0	1696265	0.11280038468497866	TRUE	0.9999	C	1e-5	1e-5	0.9999	1e-5	1e-5	1e-5	1e-5	1e-5	1e-5	1e-5	1e-5	FALSE
I	1136414	1150297	QG536	CX11262	1	214	7	7	13883	#CC1700	59985814	FALSE	NIC2	TRUE	276	4744941	15037759	0.3155351139754268	0	1696265	0.11280038468497866	TRUE	0.9999	C	1e-5	1e-5	0.9999	1e-5	1e-5	1e-5	1e-5	1e-5	1e-5	1e-5	1e-5	FALSE
I	1150297	1175482	ED3048	CX11262	0.9	214	8	4	25185	#CC0B00	150684368	FALSE	NIC2	TRUE	276	4744941	15037759	0.3155351139754268	0	1696265	0.11280038468497866	TRUE	0.9999	C	1e-5	1e-5	0.9999	1e-5	1e-5	1e-5	1e-5	1e-5	1e-5	1e-5	1e-5	FALSE
I	1175482	1182670	QG536	CX11262	1	214	9	7	7188	#CC1700	59985814	FALSE	NIC2	TRUE	276	4744941	15037759	0.3155351139754268	0	1696265	0.11280038468497866	TRUE	0.9999	C	1e-5	1e-5	0.9999	1e-5	1e-5	1e-5	1e-5	1e-5	1e-5	1e-5	1e-5	FALSE
I	1182670	1190482	ED3048	CX11262	0.9	214	10	4	7812	#CC0B00	150684368	FALSE	NIC2	TRUE	276	4744941	15037759	0.3155351139754268	0	1696265	0.11280038468497866	TRUE	0.9999	C	1e-5	1e-5	0.9999	1e-5	1e-5	1e-5	1e-5	1e-5	1e-5	1e-5	1e-5	FALSE
I	1190482	1242553	NIC2	CX11262	1	214	11	1	52071	#CC0000	2453905988	TRUE	NIC2	TRUE	276	4744941	15037759	0.3155351139754268	0	1696265	0.11280038468497866	TRUE	0.9999	C	1e-5	1e-5	0.9999	1e-5	1e-5	1e-5	1e-5	1e-5	1e-5	1e-5	1e-5	FALSE
I	1242553	1344494	ED3048	CX11262	0.9	214	12	4	101941	#CC0B00	150684368	FALSE	NIC2	TRUE	276	4744941	15037759	0.3155351139754268	0	1696265	0.11280038468497866	TRUE	0.9999	C	1e-5	1e-5	0.9999	1e-5	1e-5	1e-5	1e-5	1e-5	1e-5	1e-5	1e-5	FALSE
I	1344494	1420764	NIC2	CX11262	1	214	13	1	76270	#CC0000	2453905988	TRUE	NIC2	TRUE	276	4744941	15037759	0.3155351139754268	0	1696265	0.11280038468497866	TRUE	0.9999	C	1e-5	1e-5	0.9999	1e-5	1e-5	1e-5	1e-5	1e-5	1e-5	1e-5	1e-5	FALSE
I	1420764	1486678	ED3048	CX11262	0.9	214	14	4	65914	#CC0B00	150684368	FALSE	NIC2	TRUE	276	4744941	15037759	0.3155351139754268	0	1696265	0.11280038468497866	TRUE	0.9999	C	1e-5	1e-5	0.9999	1e-5	1e-5	1e-5	1e-5	1e-5	1e-5	1e-5	1e-5	FALSE
I	1486678	1492117	NIC2	CX11262	1	214	15	1	5439	#CC0000	2453905988	TRUE	NIC2	TRUE	276	4744941	15037759	0.3155351139754268	0	1696265	0.11280038468497866	TRUE	0.9999	C	1e-5	1e-5	0.9999	1e-5	1e-5	1e-5	1e-5	1e-5	1e-5	1e-5	1e-5	FALSE
I	1492117	1496191	CX11271	CX11262	1	214	16	23	4074	#FF6800	5445413	FALSE	NIC2	TRUE	276	4744941	15037759	0.3155351139754268	0	1696265	0.11280038468497866	TRUE	0.9999	C	1e-5	1e-5	0.9999	1e-5	1e-5	1e-5	1e-5	1e-5	1e-5	1e-5	1e-5	FALSE
I	1496191	1502794	NIC2	CX11262	1	214	17	1	6603	#CC0000	2453905988	TRUE	NIC2	TRUE	276	4744941	15037759	0.3155351139754268	0	1696265	0.11280038468497866	TRUE	0.9999	C	1e-5	1e-5	0.9999	1e-5	1e-5	1e-5	1e-5	1e-5	1e-5	1e-5	1e-5	FALSE
I	1502794	1547144	CX11271	CX11262	1	214	18	23	44350	#FF6800	5445413	FALSE	NIC2	TRUE	276	4744941	15037759	0.3155351139754268	0	1696265	0.11280038468497866	TRUE	0.9999	C	1e-5	1e-5	0.9999	1e-5	1e-5	1e-5	1e-5	1e-5	1e-5	1e-5	1e-5	FALSE
I	1547144	1664344	CX11315	CX11262	0.9	214	19	142	117200	#00CC7C	1920943	FALSE	NIC2	TRUE	276	4744941	15037759	0.3155351139754268	0	1696265	0.11280038468497866	TRUE	0.9999	C	1e-5	1e-5	0.9999	1e-5	1e-5	1e-5	1e-5	1e-5	1e-5	1e-5	1e-5	FALSE
I	1664344	1667370	ED3048	CX11262	0.9	214	20	4	3026	#CC0B00	150684368	FALSE	NIC2	TRUE	276	4744941	15037759	0.3155351139754268	0	1696265	0.11280038468497866	TRUE	0.9999	C	1e-5	1e-5	0.9999	1e-5	1e-5	1e-5	1e-5	1e-5	1e-5	1e-5	1e-5	FALSE
I	1667370	1673170	CX11315	CX11262	0.9	214	21	142	5800	#00CC7C	1920943	FALSE	NIC2	TRUE	276	4744941	15037759	0.3155351139754268	0	1696265	0.11280038468497866	TRUE	0.9999	C	1e-5	1e-5	0.9999	1e-5	1e-5	1e-5	1e-5	1e-5	1e-5	1e-5	1e-5	FALSE
I	1673170	1676686	MY920	CX11262	0.9	214	22	12	3516	#FF8566	22692122	FALSE	NIC2	TRUE	276	4744941	15037759	0.3155351139754268	0	1696265	0.11280038468497866	TRUE	0.9999	C	1e-5	1e-5	0.9999	1e-5	1e-5	1e-5	1e-5	1e-5	1e-5	1e-5	1e-5	FALSE
I	1676686	1683094	CX11315	CX11262	0.9	214	23	142	6408	#00CC7C	1920943	FALSE	NIC2	TRUE	276	4744941	15037759	0.3155351139754268	0	1696265	0.11280038468497866	TRUE	0.9999	C	1e-5	1e-5	0.9999	1e-5	1e-5	1e-5	1e-5	1e-5	1e-5	1e-5	1e-5	FALSE
I	1683094	1691687	NIC527	CX11262	0.9	214	24	118	8593	#00CC21	1031040	FALSE	NIC2	TRUE	276	4744941	15037759	0.3155351139754268	0	1696265	0.11280038468497866	TRUE	0.9999	C	1e-5	1e-5	0.9999	1e-5	1e-5	1e-5	1e-5	1e-5	1e-5	1e-5	1e-5	FALSE
I	1691687	1704321	CX11315	CX11262	0.9	214	25	142	12634	#00CC7C	1920943	FALSE	NIC2	TRUE	276	4744941	15037759	0.3155351139754268	0	1696265	0.11280038468497866	TRUE	0.9999	C	1e-5	1e-5	0.9999	1e-5	1e-5	1e-5	1e-5	1e-5	1e-5	1e-5	1e-5	FALSE
I	1704321	1721809	ED3048	CX11262	0.9	214	26	4	17488	#CC0B00	150684368	FALSE	NIC2	TRUE	276	4744941	15037759	0.3155351139754268	0	1696265	0.11280038468497866	TRUE	0.9999	C	1e-5	1e-5	0.9999	1e-5	1e-5	1e-5	1e-5	1e-5	1e-5	1e-5	1e-5	FALSE
I	1721809	1768295	ECA349	CX11262	0.9	214	27	156	46486	#66FFEA	3899108	FALSE	NIC2	TRUE	276	4744941	15037759	0.3155351139754268	0	1696265	0.11280038468497866	TRUE	0.9999	C	1e-5	1e-5	0.9999	1e-5	1e-5	1e-5	1e-5	1e-5	1e-5	1e-5	1e-5	FALSE
I	1768295	1778536	NIC2	CX11262	1	214	28	1	10241	#CC0000	2453905988	TRUE	NIC2	TRUE	276	4744941	15037759	0.3155351139754268	0	1696265	0.11280038468497866	TRUE	0.9999	C	1e-5	1e-5	0.9999	1e-5	1e-5	1e-5	1e-5	1e-5	1e-5	1e-5	1e-5	FALSE
I	1778536	2118348	ECA349	CX11262	0.9	214	29	156	339812	#66FFEA	3899108	FALSE	NIC2	TRUE	276	4744941	15037759	0.3155351139754268	0	1696265	0.11280038468497866	TRUE	0.9999	C	1e-5	1e-5	0.9999	1e-5	1e-5	1e-5	1e-5	1e-5	1e-5	1e-5	1e-5	FALSE
I	2118348	2121442	ED3048	CX11262	0.9	214	30	4	3094	#CC0B00	150684368	FALSE	NIC2	TRUE	276	4744941	15037759	0.3155351139754268	0	1696265	0.11280038468497866	TRUE	0.9999	C	1e-5	1e-5	0.9999	1e-5	1e-5	1e-5	1e-5	1e-5	1e-5	1e-5	1e-5	FALSE
I	2121442	2191447	CX11262	CX11262	0.9	214	31	214	70005	#000DCC	10030292	FALSE	NIC2	TRUE	276	4744941	15037759	0.3155351139754268	0	1696265	0.11280038468497866	TRUE	0.9999	C	1e-5	1e-5	0.9999	1e-5	1e-5	1e-5	1e-5	1e-5	1e-5	1e-5	1e-5	FALSE
I	2191447	2204010	NIC2	CX11262	1	214	32	1	12563	#CC0000	2453905988	TRUE	NIC2	TRUE	276	4744941	15037759	0.3155351139754268	0	1696265	0.11280038468497866	TRUE	0.9999	C	1e-5	1e-5	0.9999	1e-5	1e-5	1e-5	1e-5	1e-5	1e-5	1e-5	1e-5	FALSE
I	2204010	2204012	ED3048	CX11262	0.9	214	33	4	2	#CC0B00	150684368	FALSE	NIC2	TRUE	276	4744941	15037759	0.3155351139754268	0	1696265	0.11280038468497866	TRUE	0.9999	C	1e-5	1e-5	0.9999	1e-5	1e-5	1e-5	1e-5	1e-5	1e-5	1e-5	1e-5	FALSE
I	2204012	2468912	ECA349	CX11262	0.9	214	34	156	264900	#66FFEA	3899108	FALSE	NIC2	TRUE	276	4744941	15037759	0.3155351139754268	0	1696265	0.11280038468497866	TRUE	0.9999	C	1e-5	1e-5	0.9999	1e-5	1e-5	1e-5	1e-5	1e-5	1e-5	1e-5	1e-5	FALSE
I	2468912	2513751	NIC2	CX11262	1	214	35	1	44839	#CC0000	2453905988	TRUE	NIC2	TRUE	276	4744941	15037759	0.3155351139754268	0	1696265	0.11280038468497866	TRUE	0.9999	C	1e-5	1e-5	0.9999	1e-5	1e-5	1e-5	1e-5	1e-5	1e-5	1e-5	1e-5	FALSE
I	2513751	2576070	ED3048	CX11262	0.9	214	36	4	62319	#CC0B00	150684368	FALSE	NIC2	TRUE	276	4744941	15037759	0.3155351139754268	0	1696265	0.11280038468497866	TRUE	0.9999	C	1e-5	1e-5	0.9999	1e-5	1e-5	1e-5	1e-5	1e-5	1e-5	1e-5	1e-5	FALSE
I	2576070	2785019	NIC2	CX11262	1	214	37	1	208949	#CC0000	2453905988	TRUE	NIC2	TRUE	276	4744941	15037759	0.3155351139754268	0	1696265	0.11280038468497866	TRUE	0.9999	C	1e-5	1e-5	0.9999	1e-5	1e-5	1e-5	1e-5	1e-5	1e-5	1e-5	1e-5	FALSE
I	2785019	2864069	ED3048	CX11262	0.9	214	38	4	79050	#CC0B00	150684368	FALSE	NIC2	TRUE	276	4744941	15037759	0.3155351139754268	0	1696265	0.11280038468497866	TRUE	0.9999	C	1e-5	1e-5	0.9999	1e-5	1e-5	1e-5	1e-5	1e-5	1e-5	1e-5	1e-5	FALSE
I	2864069	2866511	NIC2	CX11262	1	214	39	1	2442	#CC0000	2453905988	TRUE	NIC2	TRUE	276	4744941	15037759	0.3155351139754268	0	1696265	0.11280038468497866	TRUE	0.9999	C	1e-5	1e-5	0.9999	1e-5	1e-5	1e-5	1e-5	1e-5	1e-5	1e-5	1e-5	FALSE
I	2866511	2867958	ED3048	CX11262	0.9	214	40	4	1447	#CC0B00	150684368	FALSE	NIC2	TRUE	276	4744941	15037759	0.3155351139754268	0	1696265	0.11280038468497866	TRUE	0.9999	C	1e-5	1e-5	0.9999	1e-5	1e-5	1e-5	1e-5	1e-5	1e-5	1e-5	1e-5	FALSE
I	2867958	3044311	NIC2	CX11262	1	214	41	1	176353	#CC0000	2453905988	TRUE	NIC2	TRUE	276	4744941	15037759	0.3155351139754268	0	1696265	0.11280038468497866	TRUE	0.9999	C	1e-5	1e-5	0.9999	1e-5	1e-5	1e-5	1e-5	1e-5	1e-5	1e-5	1e-5	FALSE
I	3044311	3155245	CX11262	CX11262	0.9	214	42	214	110934	#000DCC	10030292	FALSE	NIC2	TRUE	276	4744941	15037759	0.3155351139754268	0	1696265	0.11280038468497866	TRUE	0.9999	C	1e-5	1e-5	0.9999	1e-5	1e-5	1e-5	1e-5	1e-5	1e-5	1e-5	1e-5	FALSE
I	3155245	4851510	NIC2	CX11262	1	214	43	1	1696265	#CC0000	2453905988	TRUE	NIC2	TRUE	276	4744941	15037759	0.3155351139754268	1696265	1696265	0.11280038468497866	TRUE	0.9999	C	1e-5	1e-5	0.9999	1e-5	1e-5	1e-5	1e-5	1e-5	1e-5	1e-5	1e-5	FALSE
I	4851510	7736030	DL226	CX11262	1	214	44	165	2884520	#66FAFF	97233978	FALSE	NIC2	TRUE	276	4744941	15037759	0.3155351139754268	0	1696265	0.11280038468497866	TRUE	0.9999	C	1e-5	1e-5	0.9999	1e-5	1e-5	1e-5	1e-5	1e-5	1e-5	1e-5	1e-5	FALSE
I	7736030	8471837	NIC2	CX11262	1	214	45	1	735807	#CC0000	2453905988	TRUE	NIC2	TRUE	276	4744941	15037759	0.3155351139754268	0	1696265	0.11280038468497866	TRUE	0.9999	C	1e-5	1e-5	0.9999	1e-5	1e-5	1e-5	1e-5	1e-5	1e-5	1e-5	1e-5	FALSE
I	8471837	9623445	DL226	CX11262	1	214	46	165	1151608	#66FAFF	97233978	FALSE	NIC2	TRUE	276	4744941	15037759	0.3155351139754268	0	1696265	0.11280038468497866	TRUE	0.9999	C	1e-5	1e-5	0.9999	1e-5	1e-5	1e-5	1e-5	1e-5	1e-5	1e-5	1e-5	FALSE
I	9623445	10080990	NIC2	CX11262	1	214	47	1	457545	#CC0000	2453905988	TRUE	NIC2	TRUE	276	4744941	15037759	0.3155351139754268	0	1696265	0.11280038468497866	TRUE	0.9999	C	1e-5	1e-5	0.9999	1e-5	1e-5	1e-5	1e-5	1e-5	1e-5	1e-5	1e-5	FALSE
I	10080990	10730876	CX11262	CX11262	0.9	214	48	214	649886	#000DCC	10030292	FALSE	NIC2	TRUE	276	4744941	15037759	0.3155351139754268	0	1696265	0.11280038468497866	TRUE	0.9999	C	1e-5	1e-5	0.9999	1e-5	1e-5	1e-5	1e-5	1e-5	1e-5	1e-5	1e-5	FALSE
I	10730876	11127034	NIC2	CX11262	1	214	49	1	396158	#CC0000	2453905988	TRUE	NIC2	TRUE	276	4744941	15037759	0.3155351139754268	0	1696265	0.11280038468497866	TRUE	0.9999	C	1e-5	1e-5	0.9999	1e-5	1e-5	1e-5	1e-5	1e-5	1e-5	1e-5	1e-5	FALSE
I	11127034	11401676	CX11262	CX11262	0.9	214	50	214	274642	#000DCC	10030292	FALSE	NIC2	TRUE	276	4744941	15037759	0.3155351139754268	0	1696265	0.11280038468497866	TRUE	0.9999	C	1e-5	1e-5	0.9999	1e-5	1e-5	1e-5	1e-5	1e-5	1e-5	1e-5	1e-5	FALSE
I	11401676	11463797	NIC252	CX11262	1	214	51	199	62121	#0046CC	6704004	FALSE	NIC2	TRUE	276	4744941	15037759	0.3155351139754268	0	1696265	0.11280038468497866	TRUE	0.9999	C	1e-5	1e-5	0.9999	1e-5	1e-5	1e-5	1e-5	1e-5	1e-5	1e-5	1e-5	FALSE
I	11463797	11482863	CX11262	CX11262	0.9	214	52	214	19066	#000DCC	10030292	FALSE	NIC2	TRUE	276	4744941	15037759	0.3155351139754268	0	1696265	0.11280038468497866	TRUE	0.9999	C	1e-5	1e-5	0.9999	1e-5	1e-5	1e-5	1e-5	1e-5	1e-5	1e-5	1e-5	FALSE
I	11482863	11494125	JU1212	CX11262	1	214	53	197	11262	#0060FF	3992699	FALSE	NIC2	TRUE	276	4744941	15037759	0.3155351139754268	0	1696265	0.11280038468497866	TRUE	0.9999	C	1e-5	1e-5	0.9999	1e-5	1e-5	1e-5	1e-5	1e-5	1e-5	1e-5	1e-5	FALSE
I	11494125	11511424	CX11262	CX11262	0.9	214	54	214	17299	#000DCC	10030292	FALSE	NIC2	TRUE	276	4744941	15037759	0.3155351139754268	0	1696265	0.11280038468497866	TRUE	0.9999	C	1e-5	1e-5	0.9999	1e-5	1e-5	1e-5	1e-5	1e-5	1e-5	1e-5	1e-5	FALSE
I	11511424	11552367	RC301	CX11262	1	214	55	111	40943	#66FF6B	11345541	FALSE	NIC2	TRUE	276	4744941	15037759	0.3155351139754268	0	1696265	0.11280038468497866	TRUE	0.9999	C	1e-5	1e-5	0.9999	1e-5	1e-5	1e-5	1e-5	1e-5	1e-5	1e-5	1e-5	FALSE
I	11552367	11614441	JU2879	CX11262	0.9	214	56	210	62074	#667BFF	6815371	FALSE	NIC2	TRUE	276	4744941	15037759	0.3155351139754268	0	1696265	0.11280038468497866	TRUE	0.9999	C	1e-5	1e-5	0.9999	1e-5	1e-5	1e-5	1e-5	1e-5	1e-5	1e-5	1e-5	FALSE
I	11614441	11634083	DL226	CX11262	1	214	57	165	19642	#66FAFF	97233978	FALSE	NIC2	TRUE	276	4744941	15037759	0.3155351139754268	0	1696265	0.11280038468497866	TRUE	0.9999	C	1e-5	1e-5	0.9999	1e-5	1e-5	1e-5	1e-5	1e-5	1e-5	1e-5	1e-5	FALSE
I	11634083	11683469	JU2879	CX11262	0.9	214	58	210	49386	#667BFF	6815371	FALSE	NIC2	TRUE	276	4744941	15037759	0.3155351139754268	0	1696265	0.11280038468497866	TRUE	0.9999	C	1e-5	1e-5	0.9999	1e-5	1e-5	1e-5	1e-5	1e-5	1e-5	1e-5	1e-5	FALSE
I	11683469	11693329	JU2878	CX11262	0.9	214	59	82	9860	#67CC00	5006389	FALSE	NIC2	TRUE	276	4744941	15037759	0.3155351139754268	0	1696265	0.11280038468497866	TRUE	0.9999	C	1e-5	1e-5	0.9999	1e-5	1e-5	1e-5	1e-5	1e-5	1e-5	1e-5	1e-5	FALSE
I	11693329	11862479	JU2879	CX11262	0.9	214	60	210	169150	#667BFF	6815371	FALSE	NIC2	TRUE	276	4744941	15037759	0.3155351139754268	0	1696265	0.11280038468497866	TRUE	0.9999	C	1e-5	1e-5	0.9999	1e-5	1e-5	1e-5	1e-5	1e-5	1e-5	1e-5	1e-5	FALSE
I	11862479	11880687	JU2878	CX11262	0.9	214	61	82	18208	#67CC00	5006389	FALSE	NIC2	TRUE	276	4744941	15037759	0.3155351139754268	0	1696265	0.11280038468497866	TRUE	0.9999	C	1e-5	1e-5	0.9999	1e-5	1e-5	1e-5	1e-5	1e-5	1e-5	1e-5	1e-5	FALSE
I	11880687	11927133	JU2879	CX11262	0.9	214	62	210	46446	#667BFF	6815371	FALSE	NIC2	TRUE	276	4744941	15037759	0.3155351139754268	0	1696265	0.11280038468497866	TRUE	0.9999	C	1e-5	1e-5	0.9999	1e-5	1e-5	1e-5	1e-5	1e-5	1e-5	1e-5	1e-5	FALSE
I	11927133	11946985	JU1212	CX11262	1	214	63	197	19852	#0060FF	3992699	FALSE	NIC2	TRUE	276	4744941	15037759	0.3155351139754268	0	1696265	0.11280038468497866	TRUE	0.9999	C	1e-5	1e-5	0.9999	1e-5	1e-5	1e-5	1e-5	1e-5	1e-5	1e-5	1e-5	FALSE
I	11946985	11973375	JU2879	CX11262	0.9	214	64	210	26390	#667BFF	6815371	FALSE	NIC2	TRUE	276	4744941	15037759	0.3155351139754268	0	1696265	0.11280038468497866	TRUE	0.9999	C	1e-5	1e-5	0.9999	1e-5	1e-5	1e-5	1e-5	1e-5	1e-5	1e-5	1e-5	FALSE
I	11973375	11974365	JU2878	CX11262	0.9	214	65	82	990	#67CC00	5006389	FALSE	NIC2	TRUE	276	4744941	15037759	0.3155351139754268	0	1696265	0.11280038468497866	TRUE	0.9999	C	1e-5	1e-5	0.9999	1e-5	1e-5	1e-5	1e-5	1e-5	1e-5	1e-5	1e-5	FALSE
I	11974365	11977272	JU1581	CX11262	0.9	214	66	198	2907	#669DFF	5691106	FALSE	NIC2	TRUE	276	4744941	15037759	0.3155351139754268	0	1696265	0.11280038468497866	TRUE	0.9999	C	1e-5	1e-5	0.9999	1e-5	1e-5	1e-5	1e-5	1e-5	1e-5	1e-5	1e-5	FALSE
I	11977272	12160083	JU2879	CX11262	0.9	214	67	210	182811	#667BFF	6815371	FALSE	NIC2	TRUE	276	4744941	15037759	0.3155351139754268	0	1696265	0.11280038468497866	TRUE	0.9999	C	1e-5	1e-5	0.9999	1e-5	1e-5	1e-5	1e-5	1e-5	1e-5	1e-5	1e-5	FALSE
I	12160083	12162874	JU2841	CX11262	0.9	214	68	168	2791	#66F2FF	8089902	FALSE	NIC2	TRUE	276	4744941	15037759	0.3155351139754268	0	1696265	0.11280038468497866	TRUE	0.9999	C	1e-5	1e-5	0.9999	1e-5	1e-5	1e-5	1e-5	1e-5	1e-5	1e-5	1e-5	FALSE
I	12162874	12177568	JU2879	CX11262	0.9	214	69	210	14694	#667BFF	6815371	FALSE	NIC2	TRUE	276	4744941	15037759	0.3155351139754268	0	1696265	0.11280038468497866	TRUE	0.9999	C	1e-5	1e-5	0.9999	1e-5	1e-5	1e-5	1e-5	1e-5	1e-5	1e-5	1e-5	FALSE
I	12177568	12178442	MY2713	CX11262	0.9	214	70	126	874	#66FF95	33304261	FALSE	NIC2	TRUE	276	4744941	15037759	0.3155351139754268	0	1696265	0.11280038468497866	TRUE	0.9999	C	1e-5	1e-5	0.9999	1e-5	1e-5	1e-5	1e-5	1e-5	1e-5	1e-5	1e-5	FALSE
I	12178442	12240592	JU2879	CX11262	0.9	214	71	210	62150	#667BFF	6815371	FALSE	NIC2	TRUE	276	4744941	15037759	0.3155351139754268	0	1696265	0.11280038468497866	TRUE	0.9999	C	1e-5	1e-5	0.9999	1e-5	1e-5	1e-5	1e-5	1e-5	1e-5	1e-5	1e-5	FALSE
I	12240592	12855952	NIC2	CX11262	1	214	72	1	615360	#CC0000	2453905988	TRUE	NIC2	TRUE	276	4744941	15037759	0.3155351139754268	0	1696265	0.11280038468497866	TRUE	0.9999	C	1e-5	1e-5	0.9999	1e-5	1e-5	1e-5	1e-5	1e-5	1e-5	1e-5	1e-5	FALSE
I	12855952	12863669	NIC513	CX11262	1	214	73	43	7717	#CC9E00	4340233	FALSE	NIC2	TRUE	276	4744941	15037759	0.3155351139754268	0	1696265	0.11280038468497866	TRUE	0.9999	C	1e-5	1e-5	0.9999	1e-5	1e-5	1e-5	1e-5	1e-5	1e-5	1e-5	1e-5	FALSE
I	12863669	12912527	NIC2	CX11262	1	214	74	1	48858	#CC0000	2453905988	TRUE	NIC2	TRUE	276	4744941	15037759	0.3155351139754268	0	1696265	0.11280038468497866	TRUE	0.9999	C	1e-5	1e-5	0.9999	1e-5	1e-5	1e-5	1e-5	1e-5	1e-5	1e-5	1e-5	FALSE
I	12912527	12931527	QX1233	CX11262	0.9	214	75	170	19000	#00E0FF	2528076	FALSE	NIC2	TRUE	276	4744941	15037759	0.3155351139754268	0	1696265	0.11280038468497866	TRUE	0.9999	C	1e-5	1e-5	0.9999	1e-5	1e-5	1e-5	1e-5	1e-5	1e-5	1e-5	1e-5	FALSE
I	12931527	12933827	NIC2	CX11262	1	214	76	1	2300	#CC0000	2453905988	TRUE	NIC2	TRUE	276	4744941	15037759	0.3155351139754268	0	1696265	0.11280038468497866	TRUE	0.9999	C	1e-5	1e-5	0.9999	1e-5	1e-5	1e-5	1e-5	1e-5	1e-5	1e-5	1e-5	FALSE
I	12933827	13001413	QX1233	CX11262	0.9	214	77	170	67586	#00E0FF	2528076	FALSE	NIC2	TRUE	276	4744941	15037759	0.3155351139754268	0	1696265	0.11280038468497866	TRUE	0.9999	C	1e-5	1e-5	0.9999	1e-5	1e-5	1e-5	1e-5	1e-5	1e-5	1e-5	1e-5	FALSE
I	13001413	13001780	NIC2	CX11262	1	214	78	1	367	#CC0000	2453905988	TRUE	NIC2	TRUE	276	4744941	15037759	0.3155351139754268	0	1696265	0.11280038468497866	TRUE	0.9999	C	1e-5	1e-5	0.9999	1e-5	1e-5	1e-5	1e-5	1e-5	1e-5	1e-5	1e-5	FALSE
I	13001780	13009869	QX1233	CX11262	0.9	214	79	170	8089	#00E0FF	2528076	FALSE	NIC2	TRUE	276	4744941	15037759	0.3155351139754268	0	1696265	0.11280038468497866	TRUE	0.9999	C	1e-5	1e-5	0.9999	1e-5	1e-5	1e-5	1e-5	1e-5	1e-5	1e-5	1e-5	FALSE
I	13009869	13037729	JU2619	CX11262	1	214	80	135	27860	#66FFAF	5782227	FALSE	NIC2	TRUE	276	4744941	15037759	0.3155351139754268	0	1696265	0.11280038468497866	TRUE	0.9999	C	1e-5	1e-5	0.9999	1e-5	1e-5	1e-5	1e-5	1e-5	1e-5	1e-5	1e-5	FALSE
I	13037729	13038469	NIC242	CX11262	0.9	214	81	40	740	#CC9300	23039935	FALSE	NIC2	TRUE	276	4744941	15037759	0.3155351139754268	0	1696265	0.11280038468497866	TRUE	0.9999	C	1e-5	1e-5	0.9999	1e-5	1e-5	1e-5	1e-5	1e-5	1e-5	1e-5	1e-5	FALSE
I	13038469	13178596	NIC2	CX11262	1	214	82	1	140127	#CC0000	2453905988	TRUE	NIC2	TRUE	276	4744941	15037759	0.3155351139754268	0	1696265	0.11280038468497866	TRUE	0.9999	C	1e-5	1e-5	0.9999	1e-5	1e-5	1e-5	1e-5	1e-5	1e-5	1e-5	1e-5	FALSE
I	13178596	13180655	AB1	CX11262	1	214	83	35	2059	#FFA000	12133383	FALSE	NIC2	TRUE	276	4744941	15037759	0.3155351139754268	0	1696265	0.11280038468497866	TRUE	0.9999	C	1e-5	1e-5	0.9999	1e-5	1e-5	1e-5	1e-5	1e-5	1e-5	1e-5	1e-5	FALSE
I	13180655	13286590	DL226	CX11262	1	214	84	165	105935	#66FAFF	97233978	FALSE	NIC2	TRUE	276	4744941	15037759	0.3155351139754268	0	1696265	0.11280038468497866	TRUE	0.9999	C	1e-5	1e-5	0.9999	1e-5	1e-5	1e-5	1e-5	1e-5	1e-5	1e-5	1e-5	FALSE
I	13286590	13348750	JU2619	CX11262	1	214	85	135	62160	#66FFAF	5782227	FALSE	NIC2	TRUE	276	4744941	15037759	0.3155351139754268	0	1696265	0.11280038468497866	TRUE	0.9999	C	1e-5	1e-5	0.9999	1e-5	1e-5	1e-5	1e-5	1e-5	1e-5	1e-5	1e-5	FALSE
I	13348750	13355097	QX1233	CX11262	0.9	214	86	170	6347	#00E0FF	2528076	FALSE	NIC2	TRUE	276	4744941	15037759	0.3155351139754268	0	1696265	0.11280038468497866	TRUE	0.9999	C	1e-5	1e-5	0.9999	1e-5	1e-5	1e-5	1e-5	1e-5	1e-5	1e-5	1e-5	FALSE
I	13355097	13355703	JU1409	CX11262	1	214	87	83	606	#7CFF00	63822	FALSE	NIC2	TRUE	276	4744941	15037759	0.3155351139754268	0	1696265	0.11280038468497866	TRUE	0.9999	C	1e-5	1e-5	0.9999	1e-5	1e-5	1e-5	1e-5	1e-5	1e-5	1e-5	1e-5	FALSE
I	13355703	13359336	QX1233	CX11262	0.9	214	88	170	3633	#00E0FF	2528076	FALSE	NIC2	TRUE	276	4744941	15037759	0.3155351139754268	0	1696265	0.11280038468497866	TRUE	0.9999	C	1e-5	1e-5	0.9999	1e-5	1e-5	1e-5	1e-5	1e-5	1e-5	1e-5	1e-5	FALSE
I	13359336	13480345	KR314	CX11262	1	214	89	81	121009	#B6FF66	29187083	FALSE	NIC2	TRUE	276	4744941	15037759	0.3155351139754268	0	1696265	0.11280038468497866	TRUE	0.9999	C	1e-5	1e-5	0.9999	1e-5	1e-5	1e-5	1e-5	1e-5	1e-5	1e-5	1e-5	FALSE
I	13480345	13503440	QX1233	CX11262	0.9	214	90	170	23095	#00E0FF	2528076	FALSE	NIC2	TRUE	276	4744941	15037759	0.3155351139754268	0	1696265	0.11280038468497866	TRUE	0.9999	C	1e-5	1e-5	0.9999	1e-5	1e-5	1e-5	1e-5	1e-5	1e-5	1e-5	1e-5	FALSE
I	13503440	13717520	KR314	CX11262	1	214	91	81	214080	#B6FF66	29187083	FALSE	NIC2	TRUE	276	4744941	15037759	0.3155351139754268	0	1696265	0.11280038468497866	TRUE	0.9999	C	1e-5	1e-5	0.9999	1e-5	1e-5	1e-5	1e-5	1e-5	1e-5	1e-5	1e-5	FALSE
I	13717520	13718018	JT11398	CX11262	0.9	214	92	50	498	#FFE700	5001544	FALSE	NIC2	TRUE	276	4744941	15037759	0.3155351139754268	0	1696265	0.11280038468497866	TRUE	0.9999	C	1e-5	1e-5	0.9999	1e-5	1e-5	1e-5	1e-5	1e-5	1e-5	1e-5	1e-5	FALSE
I	13718018	13919921	KR314	CX11262	1	214	93	81	201903	#B6FF66	29187083	FALSE	NIC2	TRUE	276	4744941	15037759	0.3155351139754268	0	1696265	0.11280038468497866	TRUE	0.9999	C	1e-5	1e-5	0.9999	1e-5	1e-5	1e-5	1e-5	1e-5	1e-5	1e-5	1e-5	FALSE
I	13919921	13949566	NIC242	CX11262	0.9	214	94	40	29645	#CC9300	23039935	FALSE	NIC2	TRUE	276	4744941	15037759	0.3155351139754268	0	1696265	0.11280038468497866	TRUE	0.9999	C	1e-5	1e-5	0.9999	1e-5	1e-5	1e-5	1e-5	1e-5	1e-5	1e-5	1e-5	FALSE
I	13949566	14108112	KR314	CX11262	1	214	95	81	158546	#B6FF66	29187083	FALSE	NIC2	TRUE	276	4744941	15037759	0.3155351139754268	0	1696265	0.11280038468497866	TRUE	0.9999	C	1e-5	1e-5	0.9999	1e-5	1e-5	1e-5	1e-5	1e-5	1e-5	1e-5	1e-5	FALSE
I	14108112	14109917	NIC2	CX11262	1	214	96	1	1805	#CC0000	2453905988	TRUE	NIC2	TRUE	276	4744941	15037759	0.3155351139754268	0	1696265	0.11280038468497866	TRUE	0.9999	C	1e-5	1e-5	0.9999	1e-5	1e-5	1e-5	1e-5	1e-5	1e-5	1e-5	1e-5	FALSE
I	14109917	14118382	KR314	CX11262	1	214	97	81	8465	#B6FF66	29187083	FALSE	NIC2	TRUE	276	4744941	15037759	0.3155351139754268	0	1696265	0.11280038468497866	TRUE	0.9999	C	1e-5	1e-5	0.9999	1e-5	1e-5	1e-5	1e-5	1e-5	1e-5	1e-5	1e-5	FALSE
I	14118382	14246260	QX1233	CX11262	0.9	214	98	170	127878	#00E0FF	2528076	FALSE	NIC2	TRUE	276	4744941	15037759	0.3155351139754268	0	1696265	0.11280038468497866	TRUE	0.9999	C	1e-5	1e-5	0.9999	1e-5	1e-5	1e-5	1e-5	1e-5	1e-5	1e-5	1e-5	FALSE
I	14246260	14247489	MY2535	CX11262	0.9	214	99	10	1229	#CC2200	212766310	FALSE	NIC2	TRUE	276	4744941	15037759	0.3155351139754268	0	1696265	0.11280038468497866	TRUE	0.9999	C	1e-5	1e-5	0.9999	1e-5	1e-5	1e-5	1e-5	1e-5	1e-5	1e-5	1e-5	FALSE
I	14247489	14253600	KR314	CX11262	1	214	100	81	6111	#B6FF66	29187083	FALSE	NIC2	TRUE	276	4744941	15037759	0.3155351139754268	0	1696265	0.11280038468497866	TRUE	0.9999	C	1e-5	1e-5	0.9999	1e-5	1e-5	1e-5	1e-5	1e-5	1e-5	1e-5	1e-5	FALSE
I	14253600	14273966	QX1233	CX11262	0.9	214	101	170	20366	#00E0FF	2528076	FALSE	NIC2	TRUE	276	4744941	15037759	0.3155351139754268	0	1696265	0.11280038468497866	TRUE	0.9999	C	1e-5	1e-5	0.9999	1e-5	1e-5	1e-5	1e-5	1e-5	1e-5	1e-5	1e-5	FALSE
I	14273966	14278324	MY2535	CX11262	0.9	214	102	10	4358	#CC2200	212766310	FALSE	NIC2	TRUE	276	4744941	15037759	0.3155351139754268	0	1696265	0.11280038468497866	TRUE	0.9999	C	1e-5	1e-5	0.9999	1e-5	1e-5	1e-5	1e-5	1e-5	1e-5	1e-5	1e-5	FALSE
I	14278324	14314633	QX1233	CX11262	0.9	214	103	170	36309	#00E0FF	2528076	FALSE	NIC2	TRUE	276	4744941	15037759	0.3155351139754268	0	1696265	0.11280038468497866	TRUE	0.9999	C	1e-5	1e-5	0.9999	1e-5	1e-5	1e-5	1e-5	1e-5	1e-5	1e-5	1e-5	FALSE
I	14314633	14380474	KR314	CX11262	1	214	104	81	65841	#B6FF66	29187083	FALSE	NIC2	TRUE	276	4744941	15037759	0.3155351139754268	0	1696265	0.11280038468497866	TRUE	0.9999	C	1e-5	1e-5	0.9999	1e-5	1e-5	1e-5	1e-5	1e-5	1e-5	1e-5	1e-5	FALSE
I	14380474	14468960	QX1233	CX11262	0.9	214	105	170	88486	#00E0FF	2528076	FALSE	NIC2	TRUE	276	4744941	15037759	0.3155351139754268	0	1696265	0.11280038468497866	TRUE	0.9999	C	1e-5	1e-5	0.9999	1e-5	1e-5	1e-5	1e-5	1e-5	1e-5	1e-5	1e-5	FALSE
I	14468960	14478186	NIC2	CX11262	1	214	106	1	9226	#CC0000	2453905988	TRUE	NIC2	TRUE	276	4744941	15037759	0.3155351139754268	0	1696265	0.11280038468497866	TRUE	0.9999	C	1e-5	1e-5	0.9999	1e-5	1e-5	1e-5	1e-5	1e-5	1e-5	1e-5	1e-5	FALSE
I	14478186	14586176	QX1233	CX11262	0.9	214	107	170	107990	#00E0FF	2528076	FALSE	NIC2	TRUE	276	4744941	15037759	0.3155351139754268	0	1696265	0.11280038468497866	TRUE	0.9999	C	1e-5	1e-5	0.9999	1e-5	1e-5	1e-5	1e-5	1e-5	1e-5	1e-5	1e-5	FALSE
I	14586176	14644637	NIC277	CX11262	1	214	108	39	58461	#FFD166	16231262	FALSE	NIC2	TRUE	276	4744941	15037759	0.3155351139754268	0	1696265	0.11280038468497866	TRUE	0.9999	C	1e-5	1e-5	0.9999	1e-5	1e-5	1e-5	1e-5	1e-5	1e-5	1e-5	1e-5	FALSE
I	14644637	14659577	QX1233	CX11262	0.9	214	109	170	14940	#00E0FF	2528076	FALSE	NIC2	TRUE	276	4744941	15037759	0.3155351139754268	0	1696265	0.11280038468497866	TRUE	0.9999	C	1e-5	1e-5	0.9999	1e-5	1e-5	1e-5	1e-5	1e-5	1e-5	1e-5	1e-5	FALSE
I	14659577	14745416	DL226	CX11262	1	214	110	165	85839	#66FAFF	97233978	FALSE	NIC2	TRUE	276	4744941	15037759	0.3155351139754268	0	1696265	0.11280038468497866	TRUE	0.9999	C	1e-5	1e-5	0.9999	1e-5	1e-5	1e-5	1e-5	1e-5	1e-5	1e-5	1e-5	FALSE
I	14745416	15041422	KR314	CX11262	1	214	111	81	296006	#B6FF66	29187083	FALSE	NIC2	TRUE	276	4744941	15037759	0.3155351139754268	0	1696265	0.11280038468497866	TRUE	0.9999	C	1e-5	1e-5	0.9999	1e-5	1e-5	1e-5	1e-5	1e-5	1e-5	1e-5	1e-5	FALSE
I	3663	125090	CX11315	CX11264	0.9	215	1	142	121427	#00CC7C	1920943	FALSE	NIC2	TRUE	276	9671601	15037759	0.6431544088450946	0	8750089	0.5818745332998089	TRUE	0.9999	C	1e-5	1e-5	0.9999	1e-5	1e-5	1e-5	1e-5	1e-5	1e-5	1e-5	1e-5	FALSE
I	125090	874281	ED3048	CX11264	0.9	215	2	4	749191	#CC0B00	150684368	FALSE	NIC2	TRUE	276	9671601	15037759	0.6431544088450946	0	8750089	0.5818745332998089	TRUE	0.9999	C	1e-5	1e-5	0.9999	1e-5	1e-5	1e-5	1e-5	1e-5	1e-5	1e-5	1e-5	FALSE
I	874281	880171	NIC515	CX11264	1	215	3	55	5890	#CCCC00	3080288	FALSE	NIC2	TRUE	276	9671601	15037759	0.6431544088450946	0	8750089	0.5818745332998089	TRUE	0.9999	C	1e-5	1e-5	0.9999	1e-5	1e-5	1e-5	1e-5	1e-5	1e-5	1e-5	1e-5	FALSE
I	880171	1051922	JU2866	CX11264	1	215	4	137	171751	#00FF83	6107741	FALSE	NIC2	TRUE	276	9671601	15037759	0.6431544088450946	0	8750089	0.5818745332998089	TRUE	0.9999	C	1e-5	1e-5	0.9999	1e-5	1e-5	1e-5	1e-5	1e-5	1e-5	1e-5	1e-5	FALSE
I	1051922	1091061	QG536	CX11264	1	215	5	7	39139	#CC1700	59985814	FALSE	NIC2	TRUE	276	9671601	15037759	0.6431544088450946	0	8750089	0.5818745332998089	TRUE	0.9999	C	1e-5	1e-5	0.9999	1e-5	1e-5	1e-5	1e-5	1e-5	1e-5	1e-5	1e-5	FALSE
I	1091061	1136414	NIC2	CX11264	1	215	6	1	45353	#CC0000	2453905988	TRUE	NIC2	TRUE	276	9671601	15037759	0.6431544088450946	0	8750089	0.5818745332998089	TRUE	0.9999	C	1e-5	1e-5	0.9999	1e-5	1e-5	1e-5	1e-5	1e-5	1e-5	1e-5	1e-5	FALSE
I	1136414	1150297	QG536	CX11264	1	215	7	7	13883	#CC1700	59985814	FALSE	NIC2	TRUE	276	9671601	15037759	0.6431544088450946	0	8750089	0.5818745332998089	TRUE	0.9999	C	1e-5	1e-5	0.9999	1e-5	1e-5	1e-5	1e-5	1e-5	1e-5	1e-5	1e-5	FALSE
I	1150297	1175482	ED3048	CX11264	0.9	215	8	4	25185	#CC0B00	150684368	FALSE	NIC2	TRUE	276	9671601	15037759	0.6431544088450946	0	8750089	0.5818745332998089	TRUE	0.9999	C	1e-5	1e-5	0.9999	1e-5	1e-5	1e-5	1e-5	1e-5	1e-5	1e-5	1e-5	FALSE
I	1175482	1182670	QG536	CX11264	1	215	9	7	7188	#CC1700	59985814	FALSE	NIC2	TRUE	276	9671601	15037759	0.6431544088450946	0	8750089	0.5818745332998089	TRUE	0.9999	C	1e-5	1e-5	0.9999	1e-5	1e-5	1e-5	1e-5	1e-5	1e-5	1e-5	1e-5	FALSE
I	1182670	1190482	ED3048	CX11264	0.9	215	10	4	7812	#CC0B00	150684368	FALSE	NIC2	TRUE	276	9671601	15037759	0.6431544088450946	0	8750089	0.5818745332998089	TRUE	0.9999	C	1e-5	1e-5	0.9999	1e-5	1e-5	1e-5	1e-5	1e-5	1e-5	1e-5	1e-5	FALSE
I	1190482	1242553	NIC2	CX11264	1	215	11	1	52071	#CC0000	2453905988	TRUE	NIC2	TRUE	276	9671601	15037759	0.6431544088450946	0	8750089	0.5818745332998089	TRUE	0.9999	C	1e-5	1e-5	0.9999	1e-5	1e-5	1e-5	1e-5	1e-5	1e-5	1e-5	1e-5	FALSE
I	1242553	1344494	ED3048	CX11264	0.9	215	12	4	101941	#CC0B00	150684368	FALSE	NIC2	TRUE	276	9671601	15037759	0.6431544088450946	0	8750089	0.5818745332998089	TRUE	0.9999	C	1e-5	1e-5	0.9999	1e-5	1e-5	1e-5	1e-5	1e-5	1e-5	1e-5	1e-5	FALSE
I	1344494	1420764	NIC2	CX11264	1	215	13	1	76270	#CC0000	2453905988	TRUE	NIC2	TRUE	276	9671601	15037759	0.6431544088450946	0	8750089	0.5818745332998089	TRUE	0.9999	C	1e-5	1e-5	0.9999	1e-5	1e-5	1e-5	1e-5	1e-5	1e-5	1e-5	1e-5	FALSE
I	1420764	1486678	ED3048	CX11264	0.9	215	14	4	65914	#CC0B00	150684368	FALSE	NIC2	TRUE	276	9671601	15037759	0.6431544088450946	0	8750089	0.5818745332998089	TRUE	0.9999	C	1e-5	1e-5	0.9999	1e-5	1e-5	1e-5	1e-5	1e-5	1e-5	1e-5	1e-5	FALSE
I	1486678	1492117	NIC2	CX11264	1	215	15	1	5439	#CC0000	2453905988	TRUE	NIC2	TRUE	276	9671601	15037759	0.6431544088450946	0	8750089	0.5818745332998089	TRUE	0.9999	C	1e-5	1e-5	0.9999	1e-5	1e-5	1e-5	1e-5	1e-5	1e-5	1e-5	1e-5	FALSE
I	1492117	1496191	CX11271	CX11264	1	215	16	23	4074	#FF6800	5445413	FALSE	NIC2	TRUE	276	9671601	15037759	0.6431544088450946	0	8750089	0.5818745332998089	TRUE	0.9999	C	1e-5	1e-5	0.9999	1e-5	1e-5	1e-5	1e-5	1e-5	1e-5	1e-5	1e-5	FALSE
I	1496191	1502794	NIC2	CX11264	1	215	17	1	6603	#CC0000	2453905988	TRUE	NIC2	TRUE	276	9671601	15037759	0.6431544088450946	0	8750089	0.5818745332998089	TRUE	0.9999	C	1e-5	1e-5	0.9999	1e-5	1e-5	1e-5	1e-5	1e-5	1e-5	1e-5	1e-5	FALSE
I	1502794	1547144	CX11271	CX11264	1	215	18	23	44350	#FF6800	5445413	FALSE	NIC2	TRUE	276	9671601	15037759	0.6431544088450946	0	8750089	0.5818745332998089	TRUE	0.9999	C	1e-5	1e-5	0.9999	1e-5	1e-5	1e-5	1e-5	1e-5	1e-5	1e-5	1e-5	FALSE
I	1547144	1664344	CX11315	CX11264	0.9	215	19	142	117200	#00CC7C	1920943	FALSE	NIC2	TRUE	276	9671601	15037759	0.6431544088450946	0	8750089	0.5818745332998089	TRUE	0.9999	C	1e-5	1e-5	0.9999	1e-5	1e-5	1e-5	1e-5	1e-5	1e-5	1e-5	1e-5	FALSE
I	1664344	1667370	ED3048	CX11264	0.9	215	20	4	3026	#CC0B00	150684368	FALSE	NIC2	TRUE	276	9671601	15037759	0.6431544088450946	0	8750089	0.5818745332998089	TRUE	0.9999	C	1e-5	1e-5	0.9999	1e-5	1e-5	1e-5	1e-5	1e-5	1e-5	1e-5	1e-5	FALSE
I	1667370	1673170	CX11315	CX11264	0.9	215	21	142	5800	#00CC7C	1920943	FALSE	NIC2	TRUE	276	9671601	15037759	0.6431544088450946	0	8750089	0.5818745332998089	TRUE	0.9999	C	1e-5	1e-5	0.9999	1e-5	1e-5	1e-5	1e-5	1e-5	1e-5	1e-5	1e-5	FALSE
I	1673170	1676686	MY920	CX11264	0.9	215	22	12	3516	#FF8566	22692122	FALSE	NIC2	TRUE	276	9671601	15037759	0.6431544088450946	0	8750089	0.5818745332998089	TRUE	0.9999	C	1e-5	1e-5	0.9999	1e-5	1e-5	1e-5	1e-5	1e-5	1e-5	1e-5	1e-5	FALSE
I	1676686	1683094	CX11315	CX11264	0.9	215	23	142	6408	#00CC7C	1920943	FALSE	NIC2	TRUE	276	9671601	15037759	0.6431544088450946	0	8750089	0.5818745332998089	TRUE	0.9999	C	1e-5	1e-5	0.9999	1e-5	1e-5	1e-5	1e-5	1e-5	1e-5	1e-5	1e-5	FALSE
I	1683094	1691687	NIC527	CX11264	0.9	215	24	118	8593	#00CC21	1031040	FALSE	NIC2	TRUE	276	9671601	15037759	0.6431544088450946	0	8750089	0.5818745332998089	TRUE	0.9999	C	1e-5	1e-5	0.9999	1e-5	1e-5	1e-5	1e-5	1e-5	1e-5	1e-5	1e-5	FALSE
I	1691687	1704321	CX11315	CX11264	0.9	215	25	142	12634	#00CC7C	1920943	FALSE	NIC2	TRUE	276	9671601	15037759	0.6431544088450946	0	8750089	0.5818745332998089	TRUE	0.9999	C	1e-5	1e-5	0.9999	1e-5	1e-5	1e-5	1e-5	1e-5	1e-5	1e-5	1e-5	FALSE
I	1704321	1712160	ED3048	CX11264	0.9	215	26	4	7839	#CC0B00	150684368	FALSE	NIC2	TRUE	276	9671601	15037759	0.6431544088450946	0	8750089	0.5818745332998089	TRUE	0.9999	C	1e-5	1e-5	0.9999	1e-5	1e-5	1e-5	1e-5	1e-5	1e-5	1e-5	1e-5	FALSE
I	1712160	1752731	MY920	CX11264	0.9	215	27	12	40571	#FF8566	22692122	FALSE	NIC2	TRUE	276	9671601	15037759	0.6431544088450946	0	8750089	0.5818745332998089	TRUE	0.9999	C	1e-5	1e-5	0.9999	1e-5	1e-5	1e-5	1e-5	1e-5	1e-5	1e-5	1e-5	FALSE
I	1752731	1755383	NIC2	CX11264	1	215	28	1	2652	#CC0000	2453905988	TRUE	NIC2	TRUE	276	9671601	15037759	0.6431544088450946	0	8750089	0.5818745332998089	TRUE	0.9999	C	1e-5	1e-5	0.9999	1e-5	1e-5	1e-5	1e-5	1e-5	1e-5	1e-5	1e-5	FALSE
I	1755383	1791536	MY920	CX11264	0.9	215	29	12	36153	#FF8566	22692122	FALSE	NIC2	TRUE	276	9671601	15037759	0.6431544088450946	0	8750089	0.5818745332998089	TRUE	0.9999	C	1e-5	1e-5	0.9999	1e-5	1e-5	1e-5	1e-5	1e-5	1e-5	1e-5	1e-5	FALSE
I	1791536	1842842	NIC242	CX11264	0.9	215	30	40	51306	#CC9300	23039935	FALSE	NIC2	TRUE	276	9671601	15037759	0.6431544088450946	0	8750089	0.5818745332998089	TRUE	0.9999	C	1e-5	1e-5	0.9999	1e-5	1e-5	1e-5	1e-5	1e-5	1e-5	1e-5	1e-5	FALSE
I	1842842	1845052	NIC275	CX11264	1	215	31	27	2210	#FFB066	13184509	FALSE	NIC2	TRUE	276	9671601	15037759	0.6431544088450946	0	8750089	0.5818745332998089	TRUE	0.9999	C	1e-5	1e-5	0.9999	1e-5	1e-5	1e-5	1e-5	1e-5	1e-5	1e-5	1e-5	FALSE
I	1845052	1851727	NIC242	CX11264	0.9	215	32	40	6675	#CC9300	23039935	FALSE	NIC2	TRUE	276	9671601	15037759	0.6431544088450946	0	8750089	0.5818745332998089	TRUE	0.9999	C	1e-5	1e-5	0.9999	1e-5	1e-5	1e-5	1e-5	1e-5	1e-5	1e-5	1e-5	FALSE
I	1851727	1874368	MY920	CX11264	0.9	215	33	12	22641	#FF8566	22692122	FALSE	NIC2	TRUE	276	9671601	15037759	0.6431544088450946	0	8750089	0.5818745332998089	TRUE	0.9999	C	1e-5	1e-5	0.9999	1e-5	1e-5	1e-5	1e-5	1e-5	1e-5	1e-5	1e-5	FALSE
I	1874368	1882103	NIC277	CX11264	1	215	34	39	7735	#FFD166	16231262	FALSE	NIC2	TRUE	276	9671601	15037759	0.6431544088450946	0	8750089	0.5818745332998089	TRUE	0.9999	C	1e-5	1e-5	0.9999	1e-5	1e-5	1e-5	1e-5	1e-5	1e-5	1e-5	1e-5	FALSE
I	1882103	1988317	NIC2	CX11264	1	215	35	1	106214	#CC0000	2453905988	TRUE	NIC2	TRUE	276	9671601	15037759	0.6431544088450946	0	8750089	0.5818745332998089	TRUE	0.9999	C	1e-5	1e-5	0.9999	1e-5	1e-5	1e-5	1e-5	1e-5	1e-5	1e-5	1e-5	FALSE
I	1988317	1988890	NIC277	CX11264	1	215	36	39	573	#FFD166	16231262	FALSE	NIC2	TRUE	276	9671601	15037759	0.6431544088450946	0	8750089	0.5818745332998089	TRUE	0.9999	C	1e-5	1e-5	0.9999	1e-5	1e-5	1e-5	1e-5	1e-5	1e-5	1e-5	1e-5	FALSE
I	1988890	2007906	NIC2	CX11264	1	215	37	1	19016	#CC0000	2453905988	TRUE	NIC2	TRUE	276	9671601	15037759	0.6431544088450946	0	8750089	0.5818745332998089	TRUE	0.9999	C	1e-5	1e-5	0.9999	1e-5	1e-5	1e-5	1e-5	1e-5	1e-5	1e-5	1e-5	FALSE
I	2007906	2183457	NIC242	CX11264	0.9	215	38	40	175551	#CC9300	23039935	FALSE	NIC2	TRUE	276	9671601	15037759	0.6431544088450946	0	8750089	0.5818745332998089	TRUE	0.9999	C	1e-5	1e-5	0.9999	1e-5	1e-5	1e-5	1e-5	1e-5	1e-5	1e-5	1e-5	FALSE
I	2183457	2183628	NIC275	CX11264	1	215	39	27	171	#FFB066	13184509	FALSE	NIC2	TRUE	276	9671601	15037759	0.6431544088450946	0	8750089	0.5818745332998089	TRUE	0.9999	C	1e-5	1e-5	0.9999	1e-5	1e-5	1e-5	1e-5	1e-5	1e-5	1e-5	1e-5	FALSE
I	2183628	2189422	MY920	CX11264	0.9	215	40	12	5794	#FF8566	22692122	FALSE	NIC2	TRUE	276	9671601	15037759	0.6431544088450946	0	8750089	0.5818745332998089	TRUE	0.9999	C	1e-5	1e-5	0.9999	1e-5	1e-5	1e-5	1e-5	1e-5	1e-5	1e-5	1e-5	FALSE
I	2189422	2190339	ED3048	CX11264	0.9	215	41	4	917	#CC0B00	150684368	FALSE	NIC2	TRUE	276	9671601	15037759	0.6431544088450946	0	8750089	0.5818745332998089	TRUE	0.9999	C	1e-5	1e-5	0.9999	1e-5	1e-5	1e-5	1e-5	1e-5	1e-5	1e-5	1e-5	FALSE
I	2190339	2191480	NIC2	CX11264	1	215	42	1	1141	#CC0000	2453905988	TRUE	NIC2	TRUE	276	9671601	15037759	0.6431544088450946	0	8750089	0.5818745332998089	TRUE	0.9999	C	1e-5	1e-5	0.9999	1e-5	1e-5	1e-5	1e-5	1e-5	1e-5	1e-5	1e-5	FALSE
I	2191480	2199931	NIC242	CX11264	0.9	215	43	40	8451	#CC9300	23039935	FALSE	NIC2	TRUE	276	9671601	15037759	0.6431544088450946	0	8750089	0.5818745332998089	TRUE	0.9999	C	1e-5	1e-5	0.9999	1e-5	1e-5	1e-5	1e-5	1e-5	1e-5	1e-5	1e-5	FALSE
I	2199931	2204010	NIC2	CX11264	1	215	44	1	4079	#CC0000	2453905988	TRUE	NIC2	TRUE	276	9671601	15037759	0.6431544088450946	0	8750089	0.5818745332998089	TRUE	0.9999	C	1e-5	1e-5	0.9999	1e-5	1e-5	1e-5	1e-5	1e-5	1e-5	1e-5	1e-5	FALSE
I	2204010	2264755	ED3048	CX11264	0.9	215	45	4	60745	#CC0B00	150684368	FALSE	NIC2	TRUE	276	9671601	15037759	0.6431544088450946	0	8750089	0.5818745332998089	TRUE	0.9999	C	1e-5	1e-5	0.9999	1e-5	1e-5	1e-5	1e-5	1e-5	1e-5	1e-5	1e-5	FALSE
I	2264755	2276554	NIC242	CX11264	0.9	215	46	40	11799	#CC9300	23039935	FALSE	NIC2	TRUE	276	9671601	15037759	0.6431544088450946	0	8750089	0.5818745332998089	TRUE	0.9999	C	1e-5	1e-5	0.9999	1e-5	1e-5	1e-5	1e-5	1e-5	1e-5	1e-5	1e-5	FALSE
I	2276554	2286306	NIC275	CX11264	1	215	47	27	9752	#FFB066	13184509	FALSE	NIC2	TRUE	276	9671601	15037759	0.6431544088450946	0	8750089	0.5818745332998089	TRUE	0.9999	C	1e-5	1e-5	0.9999	1e-5	1e-5	1e-5	1e-5	1e-5	1e-5	1e-5	1e-5	FALSE
I	2286306	2373196	NIC242	CX11264	0.9	215	48	40	86890	#CC9300	23039935	FALSE	NIC2	TRUE	276	9671601	15037759	0.6431544088450946	0	8750089	0.5818745332998089	TRUE	0.9999	C	1e-5	1e-5	0.9999	1e-5	1e-5	1e-5	1e-5	1e-5	1e-5	1e-5	1e-5	FALSE
I	2373196	2376213	MY920	CX11264	0.9	215	49	12	3017	#FF8566	22692122	FALSE	NIC2	TRUE	276	9671601	15037759	0.6431544088450946	0	8750089	0.5818745332998089	TRUE	0.9999	C	1e-5	1e-5	0.9999	1e-5	1e-5	1e-5	1e-5	1e-5	1e-5	1e-5	1e-5	FALSE
I	2376213	2397107	NIC242	CX11264	0.9	215	50	40	20894	#CC9300	23039935	FALSE	NIC2	TRUE	276	9671601	15037759	0.6431544088450946	0	8750089	0.5818745332998089	TRUE	0.9999	C	1e-5	1e-5	0.9999	1e-5	1e-5	1e-5	1e-5	1e-5	1e-5	1e-5	1e-5	FALSE
I	2397107	2414171	ED3048	CX11264	0.9	215	51	4	17064	#CC0B00	150684368	FALSE	NIC2	TRUE	276	9671601	15037759	0.6431544088450946	0	8750089	0.5818745332998089	TRUE	0.9999	C	1e-5	1e-5	0.9999	1e-5	1e-5	1e-5	1e-5	1e-5	1e-5	1e-5	1e-5	FALSE
I	2414171	2500168	NIC242	CX11264	0.9	215	52	40	85997	#CC9300	23039935	FALSE	NIC2	TRUE	276	9671601	15037759	0.6431544088450946	0	8750089	0.5818745332998089	TRUE	0.9999	C	1e-5	1e-5	0.9999	1e-5	1e-5	1e-5	1e-5	1e-5	1e-5	1e-5	1e-5	FALSE
I	2500168	2523118	NIC2	CX11264	1	215	53	1	22950	#CC0000	2453905988	TRUE	NIC2	TRUE	276	9671601	15037759	0.6431544088450946	0	8750089	0.5818745332998089	TRUE	0.9999	C	1e-5	1e-5	0.9999	1e-5	1e-5	1e-5	1e-5	1e-5	1e-5	1e-5	1e-5	FALSE
I	2523118	2678904	NIC242	CX11264	0.9	215	54	40	155786	#CC9300	23039935	FALSE	NIC2	TRUE	276	9671601	15037759	0.6431544088450946	0	8750089	0.5818745332998089	TRUE	0.9999	C	1e-5	1e-5	0.9999	1e-5	1e-5	1e-5	1e-5	1e-5	1e-5	1e-5	1e-5	FALSE
I	2678904	2699854	NIC2	CX11264	1	215	55	1	20950	#CC0000	2453905988	TRUE	NIC2	TRUE	276	9671601	15037759	0.6431544088450946	0	8750089	0.5818745332998089	TRUE	0.9999	C	1e-5	1e-5	0.9999	1e-5	1e-5	1e-5	1e-5	1e-5	1e-5	1e-5	1e-5	FALSE
I	2699854	2713783	JU1440	CX11264	0.9	215	56	36	13929	#FFC966	16449770	FALSE	NIC2	TRUE	276	9671601	15037759	0.6431544088450946	0	8750089	0.5818745332998089	TRUE	0.9999	C	1e-5	1e-5	0.9999	1e-5	1e-5	1e-5	1e-5	1e-5	1e-5	1e-5	1e-5	FALSE
I	2713783	2771201	NIC2	CX11264	1	215	57	1	57418	#CC0000	2453905988	TRUE	NIC2	TRUE	276	9671601	15037759	0.6431544088450946	0	8750089	0.5818745332998089	TRUE	0.9999	C	1e-5	1e-5	0.9999	1e-5	1e-5	1e-5	1e-5	1e-5	1e-5	1e-5	1e-5	FALSE
I	2771201	2791129	JU1440	CX11264	0.9	215	58	36	19928	#FFC966	16449770	FALSE	NIC2	TRUE	276	9671601	15037759	0.6431544088450946	0	8750089	0.5818745332998089	TRUE	0.9999	C	1e-5	1e-5	0.9999	1e-5	1e-5	1e-5	1e-5	1e-5	1e-5	1e-5	1e-5	FALSE
I	2791129	2796600	ED3048	CX11264	0.9	215	59	4	5471	#CC0B00	150684368	FALSE	NIC2	TRUE	276	9671601	15037759	0.6431544088450946	0	8750089	0.5818745332998089	TRUE	0.9999	C	1e-5	1e-5	0.9999	1e-5	1e-5	1e-5	1e-5	1e-5	1e-5	1e-5	1e-5	FALSE
I	2796600	2820998	JU1440	CX11264	0.9	215	60	36	24398	#FFC966	16449770	FALSE	NIC2	TRUE	276	9671601	15037759	0.6431544088450946	0	8750089	0.5818745332998089	TRUE	0.9999	C	1e-5	1e-5	0.9999	1e-5	1e-5	1e-5	1e-5	1e-5	1e-5	1e-5	1e-5	FALSE
I	2820998	2825094	NIC2	CX11264	1	215	61	1	4096	#CC0000	2453905988	TRUE	NIC2	TRUE	276	9671601	15037759	0.6431544088450946	0	8750089	0.5818745332998089	TRUE	0.9999	C	1e-5	1e-5	0.9999	1e-5	1e-5	1e-5	1e-5	1e-5	1e-5	1e-5	1e-5	FALSE
I	2825094	2867803	JU1440	CX11264	0.9	215	62	36	42709	#FFC966	16449770	FALSE	NIC2	TRUE	276	9671601	15037759	0.6431544088450946	0	8750089	0.5818745332998089	TRUE	0.9999	C	1e-5	1e-5	0.9999	1e-5	1e-5	1e-5	1e-5	1e-5	1e-5	1e-5	1e-5	FALSE
I	2867803	2879602	JU310	CX11264	0.9	215	63	32	11799	#FF9200	14764190	FALSE	NIC2	TRUE	276	9671601	15037759	0.6431544088450946	0	8750089	0.5818745332998089	TRUE	0.9999	C	1e-5	1e-5	0.9999	1e-5	1e-5	1e-5	1e-5	1e-5	1e-5	1e-5	1e-5	FALSE
I	2879602	2896651	NIC2	CX11264	1	215	64	1	17049	#CC0000	2453905988	TRUE	NIC2	TRUE	276	9671601	15037759	0.6431544088450946	0	8750089	0.5818745332998089	TRUE	0.9999	C	1e-5	1e-5	0.9999	1e-5	1e-5	1e-5	1e-5	1e-5	1e-5	1e-5	1e-5	FALSE
I	2896651	2899495	JU310	CX11264	0.9	215	65	32	2844	#FF9200	14764190	FALSE	NIC2	TRUE	276	9671601	15037759	0.6431544088450946	0	8750089	0.5818745332998089	TRUE	0.9999	C	1e-5	1e-5	0.9999	1e-5	1e-5	1e-5	1e-5	1e-5	1e-5	1e-5	1e-5	FALSE
I	2899495	2920350	NIC2	CX11264	1	215	66	1	20855	#CC0000	2453905988	TRUE	NIC2	TRUE	276	9671601	15037759	0.6431544088450946	0	8750089	0.5818745332998089	TRUE	0.9999	C	1e-5	1e-5	0.9999	1e-5	1e-5	1e-5	1e-5	1e-5	1e-5	1e-5	1e-5	FALSE
I	2920350	2946532	JU1440	CX11264	0.9	215	67	36	26182	#FFC966	16449770	FALSE	NIC2	TRUE	276	9671601	15037759	0.6431544088450946	0	8750089	0.5818745332998089	TRUE	0.9999	C	1e-5	1e-5	0.9999	1e-5	1e-5	1e-5	1e-5	1e-5	1e-5	1e-5	1e-5	FALSE
I	2946532	2946880	JU2907	CX11264	1	215	68	21	348	#FF9F66	1007348	FALSE	NIC2	TRUE	276	9671601	15037759	0.6431544088450946	0	8750089	0.5818745332998089	TRUE	0.9999	C	1e-5	1e-5	0.9999	1e-5	1e-5	1e-5	1e-5	1e-5	1e-5	1e-5	1e-5	FALSE
I	2946880	2972791	JU1440	CX11264	0.9	215	69	36	25911	#FFC966	16449770	FALSE	NIC2	TRUE	276	9671601	15037759	0.6431544088450946	0	8750089	0.5818745332998089	TRUE	0.9999	C	1e-5	1e-5	0.9999	1e-5	1e-5	1e-5	1e-5	1e-5	1e-5	1e-5	1e-5	FALSE
I	2972791	2972966	JU2907	CX11264	1	215	70	21	175	#FF9F66	1007348	FALSE	NIC2	TRUE	276	9671601	15037759	0.6431544088450946	0	8750089	0.5818745332998089	TRUE	0.9999	C	1e-5	1e-5	0.9999	1e-5	1e-5	1e-5	1e-5	1e-5	1e-5	1e-5	1e-5	FALSE
I	2972966	3047977	NIC2	CX11264	1	215	71	1	75011	#CC0000	2453905988	TRUE	NIC2	TRUE	276	9671601	15037759	0.6431544088450946	0	8750089	0.5818745332998089	TRUE	0.9999	C	1e-5	1e-5	0.9999	1e-5	1e-5	1e-5	1e-5	1e-5	1e-5	1e-5	1e-5	FALSE
I	3047977	3064995	EG4946	CX11264	1	215	72	19	17018	#CC4400	33166819	FALSE	NIC2	TRUE	276	9671601	15037759	0.6431544088450946	0	8750089	0.5818745332998089	TRUE	0.9999	C	1e-5	1e-5	0.9999	1e-5	1e-5	1e-5	1e-5	1e-5	1e-5	1e-5	1e-5	FALSE
I	3064995	3104790	NIC2	CX11264	1	215	73	1	39795	#CC0000	2453905988	TRUE	NIC2	TRUE	276	9671601	15037759	0.6431544088450946	0	8750089	0.5818745332998089	TRUE	0.9999	C	1e-5	1e-5	0.9999	1e-5	1e-5	1e-5	1e-5	1e-5	1e-5	1e-5	1e-5	FALSE
I	3104790	3410583	EG4946	CX11264	1	215	74	19	305793	#CC4400	33166819	FALSE	NIC2	TRUE	276	9671601	15037759	0.6431544088450946	0	8750089	0.5818745332998089	TRUE	0.9999	C	1e-5	1e-5	0.9999	1e-5	1e-5	1e-5	1e-5	1e-5	1e-5	1e-5	1e-5	FALSE
I	3410583	9946989	NIC2	CX11264	1	215	75	1	6536406	#CC0000	2453905988	TRUE	NIC2	TRUE	276	9671601	15037759	0.6431544088450946	6536406	8750089	0.5818745332998089	TRUE	0.9999	C	1e-5	1e-5	0.9999	1e-5	1e-5	1e-5	1e-5	1e-5	1e-5	1e-5	1e-5	FALSE
I	9946989	10351020	EG4347	CX11264	1	215	76	5	404031	#FF1300	122541644	FALSE	NIC2	TRUE	276	9671601	15037759	0.6431544088450946	0	8750089	0.5818745332998089	TRUE	0.9999	C	1e-5	1e-5	0.9999	1e-5	1e-5	1e-5	1e-5	1e-5	1e-5	1e-5	1e-5	FALSE
I	10351020	10354853	NIC2	CX11264	1	215	77	1	3833	#CC0000	2453905988	TRUE	NIC2	TRUE	276	9671601	15037759	0.6431544088450946	0	8750089	0.5818745332998089	TRUE	0.9999	C	1e-5	1e-5	0.9999	1e-5	1e-5	1e-5	1e-5	1e-5	1e-5	1e-5	1e-5	FALSE
I	10354853	10634911	EG4347	CX11264	1	215	78	5	280058	#FF1300	122541644	FALSE	NIC2	TRUE	276	9671601	15037759	0.6431544088450946	0	8750089	0.5818745332998089	TRUE	0.9999	C	1e-5	1e-5	0.9999	1e-5	1e-5	1e-5	1e-5	1e-5	1e-5	1e-5	1e-5	FALSE
I	10634911	10639190	NIC2	CX11264	1	215	79	1	4279	#CC0000	2453905988	TRUE	NIC2	TRUE	276	9671601	15037759	0.6431544088450946	0	8750089	0.5818745332998089	TRUE	0.9999	C	1e-5	1e-5	0.9999	1e-5	1e-5	1e-5	1e-5	1e-5	1e-5	1e-5	1e-5	FALSE
I	10639190	10883065	EG4347	CX11264	1	215	80	5	243875	#FF1300	122541644	FALSE	NIC2	TRUE	276	9671601	15037759	0.6431544088450946	0	8750089	0.5818745332998089	TRUE	0.9999	C	1e-5	1e-5	0.9999	1e-5	1e-5	1e-5	1e-5	1e-5	1e-5	1e-5	1e-5	FALSE
I	10883065	10908578	NIC2	CX11264	1	215	81	1	25513	#CC0000	2453905988	TRUE	NIC2	TRUE	276	9671601	15037759	0.6431544088450946	0	8750089	0.5818745332998089	TRUE	0.9999	C	1e-5	1e-5	0.9999	1e-5	1e-5	1e-5	1e-5	1e-5	1e-5	1e-5	1e-5	FALSE
I	10908578	11396234	EG4347	CX11264	1	215	82	5	487656	#FF1300	122541644	FALSE	NIC2	TRUE	276	9671601	15037759	0.6431544088450946	0	8750089	0.5818745332998089	TRUE	0.9999	C	1e-5	1e-5	0.9999	1e-5	1e-5	1e-5	1e-5	1e-5	1e-5	1e-5	1e-5	FALSE
I	11396234	11460051	NIC2	CX11264	1	215	83	1	63817	#CC0000	2453905988	TRUE	NIC2	TRUE	276	9671601	15037759	0.6431544088450946	0	8750089	0.5818745332998089	TRUE	0.9999	C	1e-5	1e-5	0.9999	1e-5	1e-5	1e-5	1e-5	1e-5	1e-5	1e-5	1e-5	FALSE
I	11460051	11503320	EG4347	CX11264	1	215	84	5	43269	#FF1300	122541644	FALSE	NIC2	TRUE	276	9671601	15037759	0.6431544088450946	0	8750089	0.5818745332998089	TRUE	0.9999	C	1e-5	1e-5	0.9999	1e-5	1e-5	1e-5	1e-5	1e-5	1e-5	1e-5	1e-5	FALSE
I	11503320	11551724	NIC2	CX11264	1	215	85	1	48404	#CC0000	2453905988	TRUE	NIC2	TRUE	276	9671601	15037759	0.6431544088450946	0	8750089	0.5818745332998089	TRUE	0.9999	C	1e-5	1e-5	0.9999	1e-5	1e-5	1e-5	1e-5	1e-5	1e-5	1e-5	1e-5	FALSE
I	11551724	12236997	EG4347	CX11264	1	215	86	5	685273	#FF1300	122541644	FALSE	NIC2	TRUE	276	9671601	15037759	0.6431544088450946	0	8750089	0.5818745332998089	TRUE	0.9999	C	1e-5	1e-5	0.9999	1e-5	1e-5	1e-5	1e-5	1e-5	1e-5	1e-5	1e-5	FALSE
I	12236997	12435701	NIC2	CX11264	1	215	87	1	198704	#CC0000	2453905988	TRUE	NIC2	TRUE	276	9671601	15037759	0.6431544088450946	0	8750089	0.5818745332998089	TRUE	0.9999	C	1e-5	1e-5	0.9999	1e-5	1e-5	1e-5	1e-5	1e-5	1e-5	1e-5	1e-5	FALSE
I	12435701	12618732	EG4347	CX11264	1	215	88	5	183031	#FF1300	122541644	FALSE	NIC2	TRUE	276	9671601	15037759	0.6431544088450946	0	8750089	0.5818745332998089	TRUE	0.9999	C	1e-5	1e-5	0.9999	1e-5	1e-5	1e-5	1e-5	1e-5	1e-5	1e-5	1e-5	FALSE
I	12618732	14832415	NIC2	CX11264	1	215	89	1	2213683	#CC0000	2453905988	TRUE	NIC2	TRUE	276	9671601	15037759	0.6431544088450946	2213683	8750089	0.5818745332998089	TRUE	0.9999	C	1e-5	1e-5	0.9999	1e-5	1e-5	1e-5	1e-5	1e-5	1e-5	1e-5	1e-5	FALSE
I	14832415	15041422	CX11271	CX11264	1	215	90	23	209007	#FF6800	5445413	FALSE	NIC2	TRUE	276	9671601	15037759	0.6431544088450946	0	8750089	0.5818745332998089	TRUE	0.9999	C	1e-5	1e-5	0.9999	1e-5	1e-5	1e-5	1e-5	1e-5	1e-5	1e-5	1e-5	FALSE
I	3663	881269	ED3048	CX11271	0.9	23	1	4	877606	#CC0B00	150684368	FALSE	NIC2	TRUE	276	9006725	15037759	0.5989406400248867	0	7800462	0.5187250307708748	TRUE	0.441877	J	1e-5	1e-5	0.271679	0.286364	1e-5	1e-5	1e-5	1e-5	1e-5	0.441877	1e-5	FALSE
I	881269	902069	NIC2	CX11271	1	23	2	1	20800	#CC0000	2453905988	TRUE	NIC2	TRUE	276	9006725	15037759	0.5989406400248867	0	7800462	0.5187250307708748	TRUE	0.441877	J	1e-5	1e-5	0.271679	0.286364	1e-5	1e-5	1e-5	1e-5	1e-5	0.441877	1e-5	FALSE
I	902069	1024873	ED3048	CX11271	0.9	23	3	4	122804	#CC0B00	150684368	FALSE	NIC2	TRUE	276	9006725	15037759	0.5989406400248867	0	7800462	0.5187250307708748	TRUE	0.441877	J	1e-5	1e-5	0.271679	0.286364	1e-5	1e-5	1e-5	1e-5	1e-5	0.441877	1e-5	FALSE
I	1024873	1050613	NIC2	CX11271	1	23	4	1	25740	#CC0000	2453905988	TRUE	NIC2	TRUE	276	9006725	15037759	0.5989406400248867	0	7800462	0.5187250307708748	TRUE	0.441877	J	1e-5	1e-5	0.271679	0.286364	1e-5	1e-5	1e-5	1e-5	1e-5	0.441877	1e-5	FALSE
I	1050613	1091061	ED3048	CX11271	0.9	23	5	4	40448	#CC0B00	150684368	FALSE	NIC2	TRUE	276	9006725	15037759	0.5989406400248867	0	7800462	0.5187250307708748	TRUE	0.441877	J	1e-5	1e-5	0.271679	0.286364	1e-5	1e-5	1e-5	1e-5	1e-5	0.441877	1e-5	FALSE
I	1091061	1112176	NIC2	CX11271	1	23	6	1	21115	#CC0000	2453905988	TRUE	NIC2	TRUE	276	9006725	15037759	0.5989406400248867	0	7800462	0.5187250307708748	TRUE	0.441877	J	1e-5	1e-5	0.271679	0.286364	1e-5	1e-5	1e-5	1e-5	1e-5	0.441877	1e-5	FALSE
I	1112176	1190482	ED3048	CX11271	0.9	23	7	4	78306	#CC0B00	150684368	FALSE	NIC2	TRUE	276	9006725	15037759	0.5989406400248867	0	7800462	0.5187250307708748	TRUE	0.441877	J	1e-5	1e-5	0.271679	0.286364	1e-5	1e-5	1e-5	1e-5	1e-5	0.441877	1e-5	FALSE
I	1190482	1242553	NIC2	CX11271	1	23	8	1	52071	#CC0000	2453905988	TRUE	NIC2	TRUE	276	9006725	15037759	0.5989406400248867	0	7800462	0.5187250307708748	TRUE	0.441877	J	1e-5	1e-5	0.271679	0.286364	1e-5	1e-5	1e-5	1e-5	1e-5	0.441877	1e-5	FALSE
I	1242553	1344494	ED3048	CX11271	0.9	23	9	4	101941	#CC0B00	150684368	FALSE	NIC2	TRUE	276	9006725	15037759	0.5989406400248867	0	7800462	0.5187250307708748	TRUE	0.441877	J	1e-5	1e-5	0.271679	0.286364	1e-5	1e-5	1e-5	1e-5	1e-5	0.441877	1e-5	FALSE
I	1344494	1420764	NIC2	CX11271	1	23	10	1	76270	#CC0000	2453905988	TRUE	NIC2	TRUE	276	9006725	15037759	0.5989406400248867	0	7800462	0.5187250307708748	TRUE	0.441877	J	1e-5	1e-5	0.271679	0.286364	1e-5	1e-5	1e-5	1e-5	1e-5	0.441877	1e-5	FALSE
I	1420764	1486678	ED3048	CX11271	0.9	23	11	4	65914	#CC0B00	150684368	FALSE	NIC2	TRUE	276	9006725	15037759	0.5989406400248867	0	7800462	0.5187250307708748	TRUE	0.441877	J	1e-5	1e-5	0.271679	0.286364	1e-5	1e-5	1e-5	1e-5	1e-5	0.441877	1e-5	FALSE
I	1486678	1492117	NIC2	CX11271	1	23	12	1	5439	#CC0000	2453905988	TRUE	NIC2	TRUE	276	9006725	15037759	0.5989406400248867	0	7800462	0.5187250307708748	TRUE	0.441877	J	1e-5	1e-5	0.271679	0.286364	1e-5	1e-5	1e-5	1e-5	1e-5	0.441877	1e-5	FALSE
I	1492117	1496191	CX11271	CX11271	1	23	13	23	4074	#FF6800	5445413	FALSE	NIC2	TRUE	276	9006725	15037759	0.5989406400248867	0	7800462	0.5187250307708748	TRUE	0.441877	J	1e-5	1e-5	0.271679	0.286364	1e-5	1e-5	1e-5	1e-5	1e-5	0.441877	1e-5	FALSE
I	1496191	1502794	NIC2	CX11271	1	23	14	1	6603	#CC0000	2453905988	TRUE	NIC2	TRUE	276	9006725	15037759	0.5989406400248867	0	7800462	0.5187250307708748	TRUE	0.441877	J	1e-5	1e-5	0.271679	0.286364	1e-5	1e-5	1e-5	1e-5	1e-5	0.441877	1e-5	FALSE
I	1502794	1611652	CX11271	CX11271	1	23	15	23	108858	#FF6800	5445413	FALSE	NIC2	TRUE	276	9006725	15037759	0.5989406400248867	0	7800462	0.5187250307708748	TRUE	0.441877	J	1e-5	1e-5	0.271679	0.286364	1e-5	1e-5	1e-5	1e-5	1e-5	0.441877	1e-5	FALSE
I	1611652	1640212	ED3048	CX11271	0.9	23	16	4	28560	#CC0B00	150684368	FALSE	NIC2	TRUE	276	9006725	15037759	0.5989406400248867	0	7800462	0.5187250307708748	TRUE	0.441877	J	1e-5	1e-5	0.271679	0.286364	1e-5	1e-5	1e-5	1e-5	1e-5	0.441877	1e-5	FALSE
I	1640212	1660874	NIC2	CX11271	1	23	17	1	20662	#CC0000	2453905988	TRUE	NIC2	TRUE	276	9006725	15037759	0.5989406400248867	0	7800462	0.5187250307708748	TRUE	0.441877	J	1e-5	1e-5	0.271679	0.286364	1e-5	1e-5	1e-5	1e-5	1e-5	0.441877	1e-5	FALSE
I	1660874	1664148	ED3048	CX11271	0.9	23	18	4	3274	#CC0B00	150684368	FALSE	NIC2	TRUE	276	9006725	15037759	0.5989406400248867	0	7800462	0.5187250307708748	TRUE	0.441877	J	1e-5	1e-5	0.271679	0.286364	1e-5	1e-5	1e-5	1e-5	1e-5	0.441877	1e-5	FALSE
I	1664148	1704321	MY920	CX11271	0.9	23	19	12	40173	#FF8566	22692122	FALSE	NIC2	TRUE	276	9006725	15037759	0.5989406400248867	0	7800462	0.5187250307708748	TRUE	0.441877	J	1e-5	1e-5	0.271679	0.286364	1e-5	1e-5	1e-5	1e-5	1e-5	0.441877	1e-5	FALSE
I	1704321	1712160	ED3048	CX11271	0.9	23	20	4	7839	#CC0B00	150684368	FALSE	NIC2	TRUE	276	9006725	15037759	0.5989406400248867	0	7800462	0.5187250307708748	TRUE	0.441877	J	1e-5	1e-5	0.271679	0.286364	1e-5	1e-5	1e-5	1e-5	1e-5	0.441877	1e-5	FALSE
I	1712160	1752731	MY920	CX11271	0.9	23	21	12	40571	#FF8566	22692122	FALSE	NIC2	TRUE	276	9006725	15037759	0.5989406400248867	0	7800462	0.5187250307708748	TRUE	0.441877	J	1e-5	1e-5	0.271679	0.286364	1e-5	1e-5	1e-5	1e-5	1e-5	0.441877	1e-5	FALSE
I	1752731	1781567	NIC2	CX11271	1	23	22	1	28836	#CC0000	2453905988	TRUE	NIC2	TRUE	276	9006725	15037759	0.5989406400248867	0	7800462	0.5187250307708748	TRUE	0.441877	J	1e-5	1e-5	0.271679	0.286364	1e-5	1e-5	1e-5	1e-5	1e-5	0.441877	1e-5	FALSE
I	1781567	1825779	ED3048	CX11271	0.9	23	23	4	44212	#CC0B00	150684368	FALSE	NIC2	TRUE	276	9006725	15037759	0.5989406400248867	0	7800462	0.5187250307708748	TRUE	0.441877	J	1e-5	1e-5	0.271679	0.286364	1e-5	1e-5	1e-5	1e-5	1e-5	0.441877	1e-5	FALSE
I	1825779	1829697	NIC2	CX11271	1	23	24	1	3918	#CC0000	2453905988	TRUE	NIC2	TRUE	276	9006725	15037759	0.5989406400248867	0	7800462	0.5187250307708748	TRUE	0.441877	J	1e-5	1e-5	0.271679	0.286364	1e-5	1e-5	1e-5	1e-5	1e-5	0.441877	1e-5	FALSE
I	1829697	1851727	ED3048	CX11271	0.9	23	25	4	22030	#CC0B00	150684368	FALSE	NIC2	TRUE	276	9006725	15037759	0.5989406400248867	0	7800462	0.5187250307708748	TRUE	0.441877	J	1e-5	1e-5	0.271679	0.286364	1e-5	1e-5	1e-5	1e-5	1e-5	0.441877	1e-5	FALSE
I	1851727	1874368	NIC2	CX11271	1	23	26	1	22641	#CC0000	2453905988	TRUE	NIC2	TRUE	276	9006725	15037759	0.5989406400248867	0	7800462	0.5187250307708748	TRUE	0.441877	J	1e-5	1e-5	0.271679	0.286364	1e-5	1e-5	1e-5	1e-5	1e-5	0.441877	1e-5	FALSE
I	1874368	1881920	ED3048	CX11271	0.9	23	27	4	7552	#CC0B00	150684368	FALSE	NIC2	TRUE	276	9006725	15037759	0.5989406400248867	0	7800462	0.5187250307708748	TRUE	0.441877	J	1e-5	1e-5	0.271679	0.286364	1e-5	1e-5	1e-5	1e-5	1e-5	0.441877	1e-5	FALSE
I	1881920	1913957	NIC2	CX11271	1	23	28	1	32037	#CC0000	2453905988	TRUE	NIC2	TRUE	276	9006725	15037759	0.5989406400248867	0	7800462	0.5187250307708748	TRUE	0.441877	J	1e-5	1e-5	0.271679	0.286364	1e-5	1e-5	1e-5	1e-5	1e-5	0.441877	1e-5	FALSE
I	1913957	1922747	ED3048	CX11271	0.9	23	29	4	8790	#CC0B00	150684368	FALSE	NIC2	TRUE	276	9006725	15037759	0.5989406400248867	0	7800462	0.5187250307708748	TRUE	0.441877	J	1e-5	1e-5	0.271679	0.286364	1e-5	1e-5	1e-5	1e-5	1e-5	0.441877	1e-5	FALSE
I	1922747	1974234	NIC2	CX11271	1	23	30	1	51487	#CC0000	2453905988	TRUE	NIC2	TRUE	276	9006725	15037759	0.5989406400248867	0	7800462	0.5187250307708748	TRUE	0.441877	J	1e-5	1e-5	0.271679	0.286364	1e-5	1e-5	1e-5	1e-5	1e-5	0.441877	1e-5	FALSE
I	1974234	1981352	ED3048	CX11271	0.9	23	31	4	7118	#CC0B00	150684368	FALSE	NIC2	TRUE	276	9006725	15037759	0.5989406400248867	0	7800462	0.5187250307708748	TRUE	0.441877	J	1e-5	1e-5	0.271679	0.286364	1e-5	1e-5	1e-5	1e-5	1e-5	0.441877	1e-5	FALSE
I	1981352	2040543	NIC2	CX11271	1	23	32	1	59191	#CC0000	2453905988	TRUE	NIC2	TRUE	276	9006725	15037759	0.5989406400248867	0	7800462	0.5187250307708748	TRUE	0.441877	J	1e-5	1e-5	0.271679	0.286364	1e-5	1e-5	1e-5	1e-5	1e-5	0.441877	1e-5	FALSE
I	2040543	2161780	ED3048	CX11271	0.9	23	33	4	121237	#CC0B00	150684368	FALSE	NIC2	TRUE	276	9006725	15037759	0.5989406400248867	0	7800462	0.5187250307708748	TRUE	0.441877	J	1e-5	1e-5	0.271679	0.286364	1e-5	1e-5	1e-5	1e-5	1e-5	0.441877	1e-5	FALSE
I	2161780	2176348	NIC2	CX11271	1	23	34	1	14568	#CC0000	2453905988	TRUE	NIC2	TRUE	276	9006725	15037759	0.5989406400248867	0	7800462	0.5187250307708748	TRUE	0.441877	J	1e-5	1e-5	0.271679	0.286364	1e-5	1e-5	1e-5	1e-5	1e-5	0.441877	1e-5	FALSE
I	2176348	2190339	ED3048	CX11271	0.9	23	35	4	13991	#CC0B00	150684368	FALSE	NIC2	TRUE	276	9006725	15037759	0.5989406400248867	0	7800462	0.5187250307708748	TRUE	0.441877	J	1e-5	1e-5	0.271679	0.286364	1e-5	1e-5	1e-5	1e-5	1e-5	0.441877	1e-5	FALSE
I	2190339	2204010	NIC2	CX11271	1	23	36	1	13671	#CC0000	2453905988	TRUE	NIC2	TRUE	276	9006725	15037759	0.5989406400248867	0	7800462	0.5187250307708748	TRUE	0.441877	J	1e-5	1e-5	0.271679	0.286364	1e-5	1e-5	1e-5	1e-5	1e-5	0.441877	1e-5	FALSE
I	2204010	2465076	ED3048	CX11271	0.9	23	37	4	261066	#CC0B00	150684368	FALSE	NIC2	TRUE	276	9006725	15037759	0.5989406400248867	0	7800462	0.5187250307708748	TRUE	0.441877	J	1e-5	1e-5	0.271679	0.286364	1e-5	1e-5	1e-5	1e-5	1e-5	0.441877	1e-5	FALSE
I	2465076	2468912	NIC2	CX11271	1	23	38	1	3836	#CC0000	2453905988	TRUE	NIC2	TRUE	276	9006725	15037759	0.5989406400248867	0	7800462	0.5187250307708748	TRUE	0.441877	J	1e-5	1e-5	0.271679	0.286364	1e-5	1e-5	1e-5	1e-5	1e-5	0.441877	1e-5	FALSE
I	2468912	2500102	ED3048	CX11271	0.9	23	39	4	31190	#CC0B00	150684368	FALSE	NIC2	TRUE	276	9006725	15037759	0.5989406400248867	0	7800462	0.5187250307708748	TRUE	0.441877	J	1e-5	1e-5	0.271679	0.286364	1e-5	1e-5	1e-5	1e-5	1e-5	0.441877	1e-5	FALSE
I	2500102	2513751	NIC2	CX11271	1	23	40	1	13649	#CC0000	2453905988	TRUE	NIC2	TRUE	276	9006725	15037759	0.5989406400248867	0	7800462	0.5187250307708748	TRUE	0.441877	J	1e-5	1e-5	0.271679	0.286364	1e-5	1e-5	1e-5	1e-5	1e-5	0.441877	1e-5	FALSE
I	2513751	2576070	ED3048	CX11271	0.9	23	41	4	62319	#CC0B00	150684368	FALSE	NIC2	TRUE	276	9006725	15037759	0.5989406400248867	0	7800462	0.5187250307708748	TRUE	0.441877	J	1e-5	1e-5	0.271679	0.286364	1e-5	1e-5	1e-5	1e-5	1e-5	0.441877	1e-5	FALSE
I	2576070	2785019	NIC2	CX11271	1	23	42	1	208949	#CC0000	2453905988	TRUE	NIC2	TRUE	276	9006725	15037759	0.5989406400248867	0	7800462	0.5187250307708748	TRUE	0.441877	J	1e-5	1e-5	0.271679	0.286364	1e-5	1e-5	1e-5	1e-5	1e-5	0.441877	1e-5	FALSE
I	2785019	2864069	ED3048	CX11271	0.9	23	43	4	79050	#CC0B00	150684368	FALSE	NIC2	TRUE	276	9006725	15037759	0.5989406400248867	0	7800462	0.5187250307708748	TRUE	0.441877	J	1e-5	1e-5	0.271679	0.286364	1e-5	1e-5	1e-5	1e-5	1e-5	0.441877	1e-5	FALSE
I	2864069	2866511	NIC2	CX11271	1	23	44	1	2442	#CC0000	2453905988	TRUE	NIC2	TRUE	276	9006725	15037759	0.5989406400248867	0	7800462	0.5187250307708748	TRUE	0.441877	J	1e-5	1e-5	0.271679	0.286364	1e-5	1e-5	1e-5	1e-5	1e-5	0.441877	1e-5	FALSE
I	2866511	2867958	ED3048	CX11271	0.9	23	45	4	1447	#CC0B00	150684368	FALSE	NIC2	TRUE	276	9006725	15037759	0.5989406400248867	0	7800462	0.5187250307708748	TRUE	0.441877	J	1e-5	1e-5	0.271679	0.286364	1e-5	1e-5	1e-5	1e-5	1e-5	0.441877	1e-5	FALSE
I	2867958	2886099	NIC2	CX11271	1	23	46	1	18141	#CC0000	2453905988	TRUE	NIC2	TRUE	276	9006725	15037759	0.5989406400248867	0	7800462	0.5187250307708748	TRUE	0.441877	J	1e-5	1e-5	0.271679	0.286364	1e-5	1e-5	1e-5	1e-5	1e-5	0.441877	1e-5	FALSE
I	2886099	2936666	EG4946	CX11271	1	23	47	19	50567	#CC4400	33166819	FALSE	NIC2	TRUE	276	9006725	15037759	0.5989406400248867	0	7800462	0.5187250307708748	TRUE	0.441877	J	1e-5	1e-5	0.271679	0.286364	1e-5	1e-5	1e-5	1e-5	1e-5	0.441877	1e-5	FALSE
I	2936666	3018467	NIC2	CX11271	1	23	48	1	81801	#CC0000	2453905988	TRUE	NIC2	TRUE	276	9006725	15037759	0.5989406400248867	0	7800462	0.5187250307708748	TRUE	0.441877	J	1e-5	1e-5	0.271679	0.286364	1e-5	1e-5	1e-5	1e-5	1e-5	0.441877	1e-5	FALSE
I	3018467	3046978	EG4946	CX11271	1	23	49	19	28511	#CC4400	33166819	FALSE	NIC2	TRUE	276	9006725	15037759	0.5989406400248867	0	7800462	0.5187250307708748	TRUE	0.441877	J	1e-5	1e-5	0.271679	0.286364	1e-5	1e-5	1e-5	1e-5	1e-5	0.441877	1e-5	FALSE
I	3046978	3047977	NIC2	CX11271	1	23	50	1	999	#CC0000	2453905988	TRUE	NIC2	TRUE	276	9006725	15037759	0.5989406400248867	0	7800462	0.5187250307708748	TRUE	0.441877	J	1e-5	1e-5	0.271679	0.286364	1e-5	1e-5	1e-5	1e-5	1e-5	0.441877	1e-5	FALSE
I	3047977	3064995	EG4946	CX11271	1	23	51	19	17018	#CC4400	33166819	FALSE	NIC2	TRUE	276	9006725	15037759	0.5989406400248867	0	7800462	0.5187250307708748	TRUE	0.441877	J	1e-5	1e-5	0.271679	0.286364	1e-5	1e-5	1e-5	1e-5	1e-5	0.441877	1e-5	FALSE
I	3064995	3104790	NIC2	CX11271	1	23	52	1	39795	#CC0000	2453905988	TRUE	NIC2	TRUE	276	9006725	15037759	0.5989406400248867	0	7800462	0.5187250307708748	TRUE	0.441877	J	1e-5	1e-5	0.271679	0.286364	1e-5	1e-5	1e-5	1e-5	1e-5	0.441877	1e-5	FALSE
I	3104790	3410583	EG4946	CX11271	1	23	53	19	305793	#CC4400	33166819	FALSE	NIC2	TRUE	276	9006725	15037759	0.5989406400248867	0	7800462	0.5187250307708748	TRUE	0.441877	J	1e-5	1e-5	0.271679	0.286364	1e-5	1e-5	1e-5	1e-5	1e-5	0.441877	1e-5	FALSE
I	3410583	3421647	NIC2	CX11271	1	23	54	1	11064	#CC0000	2453905988	TRUE	NIC2	TRUE	276	9006725	15037759	0.5989406400248867	0	7800462	0.5187250307708748	TRUE	0.441877	J	1e-5	1e-5	0.271679	0.286364	1e-5	1e-5	1e-5	1e-5	1e-5	0.441877	1e-5	FALSE
I	3421647	3559173	EG4946	CX11271	1	23	55	19	137526	#CC4400	33166819	FALSE	NIC2	TRUE	276	9006725	15037759	0.5989406400248867	0	7800462	0.5187250307708748	TRUE	0.441877	J	1e-5	1e-5	0.271679	0.286364	1e-5	1e-5	1e-5	1e-5	1e-5	0.441877	1e-5	FALSE
I	3559173	3585161	NIC2	CX11271	1	23	56	1	25988	#CC0000	2453905988	TRUE	NIC2	TRUE	276	9006725	15037759	0.5989406400248867	0	7800462	0.5187250307708748	TRUE	0.441877	J	1e-5	1e-5	0.271679	0.286364	1e-5	1e-5	1e-5	1e-5	1e-5	0.441877	1e-5	FALSE
I	3585161	4360210	EG4946	CX11271	1	23	57	19	775049	#CC4400	33166819	FALSE	NIC2	TRUE	276	9006725	15037759	0.5989406400248867	0	7800462	0.5187250307708748	TRUE	0.441877	J	1e-5	1e-5	0.271679	0.286364	1e-5	1e-5	1e-5	1e-5	1e-5	0.441877	1e-5	FALSE
I	4360210	9946989	NIC2	CX11271	1	23	58	1	5586779	#CC0000	2453905988	TRUE	NIC2	TRUE	276	9006725	15037759	0.5989406400248867	5586779	7800462	0.5187250307708748	TRUE	0.441877	J	1e-5	1e-5	0.271679	0.286364	1e-5	1e-5	1e-5	1e-5	1e-5	0.441877	1e-5	FALSE
I	9946989	10351020	EG4347	CX11271	1	23	59	5	404031	#FF1300	122541644	FALSE	NIC2	TRUE	276	9006725	15037759	0.5989406400248867	0	7800462	0.5187250307708748	TRUE	0.441877	J	1e-5	1e-5	0.271679	0.286364	1e-5	1e-5	1e-5	1e-5	1e-5	0.441877	1e-5	FALSE
I	10351020	10354853	NIC2	CX11271	1	23	60	1	3833	#CC0000	2453905988	TRUE	NIC2	TRUE	276	9006725	15037759	0.5989406400248867	0	7800462	0.5187250307708748	TRUE	0.441877	J	1e-5	1e-5	0.271679	0.286364	1e-5	1e-5	1e-5	1e-5	1e-5	0.441877	1e-5	FALSE
I	10354853	10634911	EG4347	CX11271	1	23	61	5	280058	#FF1300	122541644	FALSE	NIC2	TRUE	276	9006725	15037759	0.5989406400248867	0	7800462	0.5187250307708748	TRUE	0.441877	J	1e-5	1e-5	0.271679	0.286364	1e-5	1e-5	1e-5	1e-5	1e-5	0.441877	1e-5	FALSE
I	10634911	10639190	NIC2	CX11271	1	23	62	1	4279	#CC0000	2453905988	TRUE	NIC2	TRUE	276	9006725	15037759	0.5989406400248867	0	7800462	0.5187250307708748	TRUE	0.441877	J	1e-5	1e-5	0.271679	0.286364	1e-5	1e-5	1e-5	1e-5	1e-5	0.441877	1e-5	FALSE
I	10639190	10883065	EG4347	CX11271	1	23	63	5	243875	#FF1300	122541644	FALSE	NIC2	TRUE	276	9006725	15037759	0.5989406400248867	0	7800462	0.5187250307708748	TRUE	0.441877	J	1e-5	1e-5	0.271679	0.286364	1e-5	1e-5	1e-5	1e-5	1e-5	0.441877	1e-5	FALSE
I	10883065	10908578	NIC2	CX11271	1	23	64	1	25513	#CC0000	2453905988	TRUE	NIC2	TRUE	276	9006725	15037759	0.5989406400248867	0	7800462	0.5187250307708748	TRUE	0.441877	J	1e-5	1e-5	0.271679	0.286364	1e-5	1e-5	1e-5	1e-5	1e-5	0.441877	1e-5	FALSE
I	10908578	11396234	EG4347	CX11271	1	23	65	5	487656	#FF1300	122541644	FALSE	NIC2	TRUE	276	9006725	15037759	0.5989406400248867	0	7800462	0.5187250307708748	TRUE	0.441877	J	1e-5	1e-5	0.271679	0.286364	1e-5	1e-5	1e-5	1e-5	1e-5	0.441877	1e-5	FALSE
I	11396234	11460051	NIC2	CX11271	1	23	66	1	63817	#CC0000	2453905988	TRUE	NIC2	TRUE	276	9006725	15037759	0.5989406400248867	0	7800462	0.5187250307708748	TRUE	0.441877	J	1e-5	1e-5	0.271679	0.286364	1e-5	1e-5	1e-5	1e-5	1e-5	0.441877	1e-5	FALSE
I	11460051	11503320	EG4347	CX11271	1	23	67	5	43269	#FF1300	122541644	FALSE	NIC2	TRUE	276	9006725	15037759	0.5989406400248867	0	7800462	0.5187250307708748	TRUE	0.441877	J	1e-5	1e-5	0.271679	0.286364	1e-5	1e-5	1e-5	1e-5	1e-5	0.441877	1e-5	FALSE
I	11503320	11551724	NIC2	CX11271	1	23	68	1	48404	#CC0000	2453905988	TRUE	NIC2	TRUE	276	9006725	15037759	0.5989406400248867	0	7800462	0.5187250307708748	TRUE	0.441877	J	1e-5	1e-5	0.271679	0.286364	1e-5	1e-5	1e-5	1e-5	1e-5	0.441877	1e-5	FALSE
I	11551724	12236997	EG4347	CX11271	1	23	69	5	685273	#FF1300	122541644	FALSE	NIC2	TRUE	276	9006725	15037759	0.5989406400248867	0	7800462	0.5187250307708748	TRUE	0.441877	J	1e-5	1e-5	0.271679	0.286364	1e-5	1e-5	1e-5	1e-5	1e-5	0.441877	1e-5	FALSE
I	12236997	12435701	NIC2	CX11271	1	23	70	1	198704	#CC0000	2453905988	TRUE	NIC2	TRUE	276	9006725	15037759	0.5989406400248867	0	7800462	0.5187250307708748	TRUE	0.441877	J	1e-5	1e-5	0.271679	0.286364	1e-5	1e-5	1e-5	1e-5	1e-5	0.441877	1e-5	FALSE
I	12435701	12618732	EG4347	CX11271	1	23	71	5	183031	#FF1300	122541644	FALSE	NIC2	TRUE	276	9006725	15037759	0.5989406400248867	0	7800462	0.5187250307708748	TRUE	0.441877	J	1e-5	1e-5	0.271679	0.286364	1e-5	1e-5	1e-5	1e-5	1e-5	0.441877	1e-5	FALSE
I	12618732	14832415	NIC2	CX11271	1	23	72	1	2213683	#CC0000	2453905988	TRUE	NIC2	TRUE	276	9006725	15037759	0.5989406400248867	2213683	7800462	0.5187250307708748	TRUE	0.441877	J	1e-5	1e-5	0.271679	0.286364	1e-5	1e-5	1e-5	1e-5	1e-5	0.441877	1e-5	FALSE
I	14832415	15041422	CX11271	CX11271	1	23	73	23	209007	#FF6800	5445413	FALSE	NIC2	TRUE	276	9006725	15037759	0.5989406400248867	0	7800462	0.5187250307708748	TRUE	0.441877	J	1e-5	1e-5	0.271679	0.286364	1e-5	1e-5	1e-5	1e-5	1e-5	0.441877	1e-5	FALSE
I	3663	881269	ED3048	CX11276	0.9	68	1	4	877606	#CC0B00	150684368	FALSE	NIC2	TRUE	276	10643085	15037759	0.7077573859243256	0	10137965	0.674167274525413	TRUE	0.591298	C	1e-5	0.015529	0.591298	0.185454	1e-5	1e-5	1e-5	1e-5	0.009696	0.197963	1e-5	FALSE
I	881269	902069	NIC2	CX11276	1	68	2	1	20800	#CC0000	2453905988	TRUE	NIC2	TRUE	276	10643085	15037759	0.7077573859243256	0	10137965	0.674167274525413	TRUE	0.591298	C	1e-5	0.015529	0.591298	0.185454	1e-5	1e-5	1e-5	1e-5	0.009696	0.197963	1e-5	FALSE
I	902069	1024873	ED3048	CX11276	0.9	68	3	4	122804	#CC0B00	150684368	FALSE	NIC2	TRUE	276	10643085	15037759	0.7077573859243256	0	10137965	0.674167274525413	TRUE	0.591298	C	1e-5	0.015529	0.591298	0.185454	1e-5	1e-5	1e-5	1e-5	0.009696	0.197963	1e-5	FALSE
I	1024873	1050613	NIC2	CX11276	1	68	4	1	25740	#CC0000	2453905988	TRUE	NIC2	TRUE	276	10643085	15037759	0.7077573859243256	0	10137965	0.674167274525413	TRUE	0.591298	C	1e-5	0.015529	0.591298	0.185454	1e-5	1e-5	1e-5	1e-5	0.009696	0.197963	1e-5	FALSE
I	1050613	1091061	ED3048	CX11276	0.9	68	5	4	40448	#CC0B00	150684368	FALSE	NIC2	TRUE	276	10643085	15037759	0.7077573859243256	0	10137965	0.674167274525413	TRUE	0.591298	C	1e-5	0.015529	0.591298	0.185454	1e-5	1e-5	1e-5	1e-5	0.009696	0.197963	1e-5	FALSE
I	1091061	1112176	NIC2	CX11276	1	68	6	1	21115	#CC0000	2453905988	TRUE	NIC2	TRUE	276	10643085	15037759	0.7077573859243256	0	10137965	0.674167274525413	TRUE	0.591298	C	1e-5	0.015529	0.591298	0.185454	1e-5	1e-5	1e-5	1e-5	0.009696	0.197963	1e-5	FALSE
I	1112176	1190482	ED3048	CX11276	0.9	68	7	4	78306	#CC0B00	150684368	FALSE	NIC2	TRUE	276	10643085	15037759	0.7077573859243256	0	10137965	0.674167274525413	TRUE	0.591298	C	1e-5	0.015529	0.591298	0.185454	1e-5	1e-5	1e-5	1e-5	0.009696	0.197963	1e-5	FALSE
I	1190482	1242553	NIC2	CX11276	1	68	8	1	52071	#CC0000	2453905988	TRUE	NIC2	TRUE	276	10643085	15037759	0.7077573859243256	0	10137965	0.674167274525413	TRUE	0.591298	C	1e-5	0.015529	0.591298	0.185454	1e-5	1e-5	1e-5	1e-5	0.009696	0.197963	1e-5	FALSE
I	1242553	1344494	ED3048	CX11276	0.9	68	9	4	101941	#CC0B00	150684368	FALSE	NIC2	TRUE	276	10643085	15037759	0.7077573859243256	0	10137965	0.674167274525413	TRUE	0.591298	C	1e-5	0.015529	0.591298	0.185454	1e-5	1e-5	1e-5	1e-5	0.009696	0.197963	1e-5	FALSE
I	1344494	1420764	NIC2	CX11276	1	68	10	1	76270	#CC0000	2453905988	TRUE	NIC2	TRUE	276	10643085	15037759	0.7077573859243256	0	10137965	0.674167274525413	TRUE	0.591298	C	1e-5	0.015529	0.591298	0.185454	1e-5	1e-5	1e-5	1e-5	0.009696	0.197963	1e-5	FALSE
I	1420764	1486678	ED3048	CX11276	0.9	68	11	4	65914	#CC0B00	150684368	FALSE	NIC2	TRUE	276	10643085	15037759	0.7077573859243256	0	10137965	0.674167274525413	TRUE	0.591298	C	1e-5	0.015529	0.591298	0.185454	1e-5	1e-5	1e-5	1e-5	0.009696	0.197963	1e-5	FALSE
I	1486678	1492117	NIC2	CX11276	1	68	12	1	5439	#CC0000	2453905988	TRUE	NIC2	TRUE	276	10643085	15037759	0.7077573859243256	0	10137965	0.674167274525413	TRUE	0.591298	C	1e-5	0.015529	0.591298	0.185454	1e-5	1e-5	1e-5	1e-5	0.009696	0.197963	1e-5	FALSE
I	1492117	1496191	CX11271	CX11276	1	68	13	23	4074	#FF6800	5445413	FALSE	NIC2	TRUE	276	10643085	15037759	0.7077573859243256	0	10137965	0.674167274525413	TRUE	0.591298	C	1e-5	0.015529	0.591298	0.185454	1e-5	1e-5	1e-5	1e-5	0.009696	0.197963	1e-5	FALSE
I	1496191	1502794	NIC2	CX11276	1	68	14	1	6603	#CC0000	2453905988	TRUE	NIC2	TRUE	276	10643085	15037759	0.7077573859243256	0	10137965	0.674167274525413	TRUE	0.591298	C	1e-5	0.015529	0.591298	0.185454	1e-5	1e-5	1e-5	1e-5	0.009696	0.197963	1e-5	FALSE
I	1502794	1611652	CX11271	CX11276	1	68	15	23	108858	#FF6800	5445413	FALSE	NIC2	TRUE	276	10643085	15037759	0.7077573859243256	0	10137965	0.674167274525413	TRUE	0.591298	C	1e-5	0.015529	0.591298	0.185454	1e-5	1e-5	1e-5	1e-5	0.009696	0.197963	1e-5	FALSE
I	1611652	1640212	ED3048	CX11276	0.9	68	16	4	28560	#CC0B00	150684368	FALSE	NIC2	TRUE	276	10643085	15037759	0.7077573859243256	0	10137965	0.674167274525413	TRUE	0.591298	C	1e-5	0.015529	0.591298	0.185454	1e-5	1e-5	1e-5	1e-5	0.009696	0.197963	1e-5	FALSE
I	1640212	1660874	NIC2	CX11276	1	68	17	1	20662	#CC0000	2453905988	TRUE	NIC2	TRUE	276	10643085	15037759	0.7077573859243256	0	10137965	0.674167274525413	TRUE	0.591298	C	1e-5	0.015529	0.591298	0.185454	1e-5	1e-5	1e-5	1e-5	0.009696	0.197963	1e-5	FALSE
I	1660874	1664148	ED3048	CX11276	0.9	68	18	4	3274	#CC0B00	150684368	FALSE	NIC2	TRUE	276	10643085	15037759	0.7077573859243256	0	10137965	0.674167274525413	TRUE	0.591298	C	1e-5	0.015529	0.591298	0.185454	1e-5	1e-5	1e-5	1e-5	0.009696	0.197963	1e-5	FALSE
I	1664148	1704321	MY920	CX11276	0.9	68	19	12	40173	#FF8566	22692122	FALSE	NIC2	TRUE	276	10643085	15037759	0.7077573859243256	0	10137965	0.674167274525413	TRUE	0.591298	C	1e-5	0.015529	0.591298	0.185454	1e-5	1e-5	1e-5	1e-5	0.009696	0.197963	1e-5	FALSE
I	1704321	1712160	ED3048	CX11276	0.9	68	20	4	7839	#CC0B00	150684368	FALSE	NIC2	TRUE	276	10643085	15037759	0.7077573859243256	0	10137965	0.674167274525413	TRUE	0.591298	C	1e-5	0.015529	0.591298	0.185454	1e-5	1e-5	1e-5	1e-5	0.009696	0.197963	1e-5	FALSE
I	1712160	1752731	MY920	CX11276	0.9	68	21	12	40571	#FF8566	22692122	FALSE	NIC2	TRUE	276	10643085	15037759	0.7077573859243256	0	10137965	0.674167274525413	TRUE	0.591298	C	1e-5	0.015529	0.591298	0.185454	1e-5	1e-5	1e-5	1e-5	0.009696	0.197963	1e-5	FALSE
I	1752731	1755383	NIC2	CX11276	1	68	22	1	2652	#CC0000	2453905988	TRUE	NIC2	TRUE	276	10643085	15037759	0.7077573859243256	0	10137965	0.674167274525413	TRUE	0.591298	C	1e-5	0.015529	0.591298	0.185454	1e-5	1e-5	1e-5	1e-5	0.009696	0.197963	1e-5	FALSE
I	1755383	1791536	MY920	CX11276	0.9	68	23	12	36153	#FF8566	22692122	FALSE	NIC2	TRUE	276	10643085	15037759	0.7077573859243256	0	10137965	0.674167274525413	TRUE	0.591298	C	1e-5	0.015529	0.591298	0.185454	1e-5	1e-5	1e-5	1e-5	0.009696	0.197963	1e-5	FALSE
I	1791536	1842842	NIC242	CX11276	0.9	68	24	40	51306	#CC9300	23039935	FALSE	NIC2	TRUE	276	10643085	15037759	0.7077573859243256	0	10137965	0.674167274525413	TRUE	0.591298	C	1e-5	0.015529	0.591298	0.185454	1e-5	1e-5	1e-5	1e-5	0.009696	0.197963	1e-5	FALSE
I	1842842	1845052	NIC275	CX11276	1	68	25	27	2210	#FFB066	13184509	FALSE	NIC2	TRUE	276	10643085	15037759	0.7077573859243256	0	10137965	0.674167274525413	TRUE	0.591298	C	1e-5	0.015529	0.591298	0.185454	1e-5	1e-5	1e-5	1e-5	0.009696	0.197963	1e-5	FALSE
I	1845052	1851727	NIC242	CX11276	0.9	68	26	40	6675	#CC9300	23039935	FALSE	NIC2	TRUE	276	10643085	15037759	0.7077573859243256	0	10137965	0.674167274525413	TRUE	0.591298	C	1e-5	0.015529	0.591298	0.185454	1e-5	1e-5	1e-5	1e-5	0.009696	0.197963	1e-5	FALSE
I	1851727	1874368	MY920	CX11276	0.9	68	27	12	22641	#FF8566	22692122	FALSE	NIC2	TRUE	276	10643085	15037759	0.7077573859243256	0	10137965	0.674167274525413	TRUE	0.591298	C	1e-5	0.015529	0.591298	0.185454	1e-5	1e-5	1e-5	1e-5	0.009696	0.197963	1e-5	FALSE
I	1874368	1882103	NIC277	CX11276	1	68	28	39	7735	#FFD166	16231262	FALSE	NIC2	TRUE	276	10643085	15037759	0.7077573859243256	0	10137965	0.674167274525413	TRUE	0.591298	C	1e-5	0.015529	0.591298	0.185454	1e-5	1e-5	1e-5	1e-5	0.009696	0.197963	1e-5	FALSE
I	1882103	1988317	NIC2	CX11276	1	68	29	1	106214	#CC0000	2453905988	TRUE	NIC2	TRUE	276	10643085	15037759	0.7077573859243256	0	10137965	0.674167274525413	TRUE	0.591298	C	1e-5	0.015529	0.591298	0.185454	1e-5	1e-5	1e-5	1e-5	0.009696	0.197963	1e-5	FALSE
I	1988317	1988890	NIC277	CX11276	1	68	30	39	573	#FFD166	16231262	FALSE	NIC2	TRUE	276	10643085	15037759	0.7077573859243256	0	10137965	0.674167274525413	TRUE	0.591298	C	1e-5	0.015529	0.591298	0.185454	1e-5	1e-5	1e-5	1e-5	0.009696	0.197963	1e-5	FALSE
I	1988890	2007906	NIC2	CX11276	1	68	31	1	19016	#CC0000	2453905988	TRUE	NIC2	TRUE	276	10643085	15037759	0.7077573859243256	0	10137965	0.674167274525413	TRUE	0.591298	C	1e-5	0.015529	0.591298	0.185454	1e-5	1e-5	1e-5	1e-5	0.009696	0.197963	1e-5	FALSE
I	2007906	2183457	NIC242	CX11276	0.9	68	32	40	175551	#CC9300	23039935	FALSE	NIC2	TRUE	276	10643085	15037759	0.7077573859243256	0	10137965	0.674167274525413	TRUE	0.591298	C	1e-5	0.015529	0.591298	0.185454	1e-5	1e-5	1e-5	1e-5	0.009696	0.197963	1e-5	FALSE
I	2183457	2183628	NIC275	CX11276	1	68	33	27	171	#FFB066	13184509	FALSE	NIC2	TRUE	276	10643085	15037759	0.7077573859243256	0	10137965	0.674167274525413	TRUE	0.591298	C	1e-5	0.015529	0.591298	0.185454	1e-5	1e-5	1e-5	1e-5	0.009696	0.197963	1e-5	FALSE
I	2183628	2189422	MY920	CX11276	0.9	68	34	12	5794	#FF8566	22692122	FALSE	NIC2	TRUE	276	10643085	15037759	0.7077573859243256	0	10137965	0.674167274525413	TRUE	0.591298	C	1e-5	0.015529	0.591298	0.185454	1e-5	1e-5	1e-5	1e-5	0.009696	0.197963	1e-5	FALSE
I	2189422	2190339	ED3048	CX11276	0.9	68	35	4	917	#CC0B00	150684368	FALSE	NIC2	TRUE	276	10643085	15037759	0.7077573859243256	0	10137965	0.674167274525413	TRUE	0.591298	C	1e-5	0.015529	0.591298	0.185454	1e-5	1e-5	1e-5	1e-5	0.009696	0.197963	1e-5	FALSE
I	2190339	2191480	NIC2	CX11276	1	68	36	1	1141	#CC0000	2453905988	TRUE	NIC2	TRUE	276	10643085	15037759	0.7077573859243256	0	10137965	0.674167274525413	TRUE	0.591298	C	1e-5	0.015529	0.591298	0.185454	1e-5	1e-5	1e-5	1e-5	0.009696	0.197963	1e-5	FALSE
I	2191480	2199931	NIC242	CX11276	0.9	68	37	40	8451	#CC9300	23039935	FALSE	NIC2	TRUE	276	10643085	15037759	0.7077573859243256	0	10137965	0.674167274525413	TRUE	0.591298	C	1e-5	0.015529	0.591298	0.185454	1e-5	1e-5	1e-5	1e-5	0.009696	0.197963	1e-5	FALSE
I	2199931	2204010	NIC2	CX11276	1	68	38	1	4079	#CC0000	2453905988	TRUE	NIC2	TRUE	276	10643085	15037759	0.7077573859243256	0	10137965	0.674167274525413	TRUE	0.591298	C	1e-5	0.015529	0.591298	0.185454	1e-5	1e-5	1e-5	1e-5	0.009696	0.197963	1e-5	FALSE
I	2204010	2264755	ED3048	CX11276	0.9	68	39	4	60745	#CC0B00	150684368	FALSE	NIC2	TRUE	276	10643085	15037759	0.7077573859243256	0	10137965	0.674167274525413	TRUE	0.591298	C	1e-5	0.015529	0.591298	0.185454	1e-5	1e-5	1e-5	1e-5	0.009696	0.197963	1e-5	FALSE
I	2264755	2276554	NIC242	CX11276	0.9	68	40	40	11799	#CC9300	23039935	FALSE	NIC2	TRUE	276	10643085	15037759	0.7077573859243256	0	10137965	0.674167274525413	TRUE	0.591298	C	1e-5	0.015529	0.591298	0.185454	1e-5	1e-5	1e-5	1e-5	0.009696	0.197963	1e-5	FALSE
I	2276554	2286306	NIC275	CX11276	1	68	41	27	9752	#FFB066	13184509	FALSE	NIC2	TRUE	276	10643085	15037759	0.7077573859243256	0	10137965	0.674167274525413	TRUE	0.591298	C	1e-5	0.015529	0.591298	0.185454	1e-5	1e-5	1e-5	1e-5	0.009696	0.197963	1e-5	FALSE
I	2286306	2373196	NIC242	CX11276	0.9	68	42	40	86890	#CC9300	23039935	FALSE	NIC2	TRUE	276	10643085	15037759	0.7077573859243256	0	10137965	0.674167274525413	TRUE	0.591298	C	1e-5	0.015529	0.591298	0.185454	1e-5	1e-5	1e-5	1e-5	0.009696	0.197963	1e-5	FALSE
I	2373196	2376213	MY920	CX11276	0.9	68	43	12	3017	#FF8566	22692122	FALSE	NIC2	TRUE	276	10643085	15037759	0.7077573859243256	0	10137965	0.674167274525413	TRUE	0.591298	C	1e-5	0.015529	0.591298	0.185454	1e-5	1e-5	1e-5	1e-5	0.009696	0.197963	1e-5	FALSE
I	2376213	2397107	NIC242	CX11276	0.9	68	44	40	20894	#CC9300	23039935	FALSE	NIC2	TRUE	276	10643085	15037759	0.7077573859243256	0	10137965	0.674167274525413	TRUE	0.591298	C	1e-5	0.015529	0.591298	0.185454	1e-5	1e-5	1e-5	1e-5	0.009696	0.197963	1e-5	FALSE
I	2397107	2414171	ED3048	CX11276	0.9	68	45	4	17064	#CC0B00	150684368	FALSE	NIC2	TRUE	276	10643085	15037759	0.7077573859243256	0	10137965	0.674167274525413	TRUE	0.591298	C	1e-5	0.015529	0.591298	0.185454	1e-5	1e-5	1e-5	1e-5	0.009696	0.197963	1e-5	FALSE
I	2414171	2500168	NIC242	CX11276	0.9	68	46	40	85997	#CC9300	23039935	FALSE	NIC2	TRUE	276	10643085	15037759	0.7077573859243256	0	10137965	0.674167274525413	TRUE	0.591298	C	1e-5	0.015529	0.591298	0.185454	1e-5	1e-5	1e-5	1e-5	0.009696	0.197963	1e-5	FALSE
I	2500168	2523118	NIC2	CX11276	1	68	47	1	22950	#CC0000	2453905988	TRUE	NIC2	TRUE	276	10643085	15037759	0.7077573859243256	0	10137965	0.674167274525413	TRUE	0.591298	C	1e-5	0.015529	0.591298	0.185454	1e-5	1e-5	1e-5	1e-5	0.009696	0.197963	1e-5	FALSE
I	2523118	2678904	NIC242	CX11276	0.9	68	48	40	155786	#CC9300	23039935	FALSE	NIC2	TRUE	276	10643085	15037759	0.7077573859243256	0	10137965	0.674167274525413	TRUE	0.591298	C	1e-5	0.015529	0.591298	0.185454	1e-5	1e-5	1e-5	1e-5	0.009696	0.197963	1e-5	FALSE
I	2678904	2699854	NIC2	CX11276	1	68	49	1	20950	#CC0000	2453905988	TRUE	NIC2	TRUE	276	10643085	15037759	0.7077573859243256	0	10137965	0.674167274525413	TRUE	0.591298	C	1e-5	0.015529	0.591298	0.185454	1e-5	1e-5	1e-5	1e-5	0.009696	0.197963	1e-5	FALSE
I	2699854	2713783	JU1440	CX11276	0.9	68	50	36	13929	#FFC966	16449770	FALSE	NIC2	TRUE	276	10643085	15037759	0.7077573859243256	0	10137965	0.674167274525413	TRUE	0.591298	C	1e-5	0.015529	0.591298	0.185454	1e-5	1e-5	1e-5	1e-5	0.009696	0.197963	1e-5	FALSE
I	2713783	2771201	NIC2	CX11276	1	68	51	1	57418	#CC0000	2453905988	TRUE	NIC2	TRUE	276	10643085	15037759	0.7077573859243256	0	10137965	0.674167274525413	TRUE	0.591298	C	1e-5	0.015529	0.591298	0.185454	1e-5	1e-5	1e-5	1e-5	0.009696	0.197963	1e-5	FALSE
I	2771201	2791129	JU1440	CX11276	0.9	68	52	36	19928	#FFC966	16449770	FALSE	NIC2	TRUE	276	10643085	15037759	0.7077573859243256	0	10137965	0.674167274525413	TRUE	0.591298	C	1e-5	0.015529	0.591298	0.185454	1e-5	1e-5	1e-5	1e-5	0.009696	0.197963	1e-5	FALSE
I	2791129	2796600	ED3048	CX11276	0.9	68	53	4	5471	#CC0B00	150684368	FALSE	NIC2	TRUE	276	10643085	15037759	0.7077573859243256	0	10137965	0.674167274525413	TRUE	0.591298	C	1e-5	0.015529	0.591298	0.185454	1e-5	1e-5	1e-5	1e-5	0.009696	0.197963	1e-5	FALSE
I	2796600	2820998	JU1440	CX11276	0.9	68	54	36	24398	#FFC966	16449770	FALSE	NIC2	TRUE	276	10643085	15037759	0.7077573859243256	0	10137965	0.674167274525413	TRUE	0.591298	C	1e-5	0.015529	0.591298	0.185454	1e-5	1e-5	1e-5	1e-5	0.009696	0.197963	1e-5	FALSE
I	2820998	2825094	NIC2	CX11276	1	68	55	1	4096	#CC0000	2453905988	TRUE	NIC2	TRUE	276	10643085	15037759	0.7077573859243256	0	10137965	0.674167274525413	TRUE	0.591298	C	1e-5	0.015529	0.591298	0.185454	1e-5	1e-5	1e-5	1e-5	0.009696	0.197963	1e-5	FALSE
I	2825094	2867803	JU1440	CX11276	0.9	68	56	36	42709	#FFC966	16449770	FALSE	NIC2	TRUE	276	10643085	15037759	0.7077573859243256	0	10137965	0.674167274525413	TRUE	0.591298	C	1e-5	0.015529	0.591298	0.185454	1e-5	1e-5	1e-5	1e-5	0.009696	0.197963	1e-5	FALSE
I	2867803	2879602	JU310	CX11276	0.9	68	57	32	11799	#FF9200	14764190	FALSE	NIC2	TRUE	276	10643085	15037759	0.7077573859243256	0	10137965	0.674167274525413	TRUE	0.591298	C	1e-5	0.015529	0.591298	0.185454	1e-5	1e-5	1e-5	1e-5	0.009696	0.197963	1e-5	FALSE
I	2879602	2896651	NIC2	CX11276	1	68	58	1	17049	#CC0000	2453905988	TRUE	NIC2	TRUE	276	10643085	15037759	0.7077573859243256	0	10137965	0.674167274525413	TRUE	0.591298	C	1e-5	0.015529	0.591298	0.185454	1e-5	1e-5	1e-5	1e-5	0.009696	0.197963	1e-5	FALSE
I	2896651	2899495	JU310	CX11276	0.9	68	59	32	2844	#FF9200	14764190	FALSE	NIC2	TRUE	276	10643085	15037759	0.7077573859243256	0	10137965	0.674167274525413	TRUE	0.591298	C	1e-5	0.015529	0.591298	0.185454	1e-5	1e-5	1e-5	1e-5	0.009696	0.197963	1e-5	FALSE
I	2899495	2920350	NIC2	CX11276	1	68	60	1	20855	#CC0000	2453905988	TRUE	NIC2	TRUE	276	10643085	15037759	0.7077573859243256	0	10137965	0.674167274525413	TRUE	0.591298	C	1e-5	0.015529	0.591298	0.185454	1e-5	1e-5	1e-5	1e-5	0.009696	0.197963	1e-5	FALSE
I	2920350	2946532	JU1440	CX11276	0.9	68	61	36	26182	#FFC966	16449770	FALSE	NIC2	TRUE	276	10643085	15037759	0.7077573859243256	0	10137965	0.674167274525413	TRUE	0.591298	C	1e-5	0.015529	0.591298	0.185454	1e-5	1e-5	1e-5	1e-5	0.009696	0.197963	1e-5	FALSE
I	2946532	2946880	JU2907	CX11276	1	68	62	21	348	#FF9F66	1007348	FALSE	NIC2	TRUE	276	10643085	15037759	0.7077573859243256	0	10137965	0.674167274525413	TRUE	0.591298	C	1e-5	0.015529	0.591298	0.185454	1e-5	1e-5	1e-5	1e-5	0.009696	0.197963	1e-5	FALSE
I	2946880	2972791	JU1440	CX11276	0.9	68	63	36	25911	#FFC966	16449770	FALSE	NIC2	TRUE	276	10643085	15037759	0.7077573859243256	0	10137965	0.674167274525413	TRUE	0.591298	C	1e-5	0.015529	0.591298	0.185454	1e-5	1e-5	1e-5	1e-5	0.009696	0.197963	1e-5	FALSE
I	2972791	2972966	JU2907	CX11276	1	68	64	21	175	#FF9F66	1007348	FALSE	NIC2	TRUE	276	10643085	15037759	0.7077573859243256	0	10137965	0.674167274525413	TRUE	0.591298	C	1e-5	0.015529	0.591298	0.185454	1e-5	1e-5	1e-5	1e-5	0.009696	0.197963	1e-5	FALSE
I	2972966	10423776	NIC2	CX11276	1	68	65	1	7450810	#CC0000	2453905988	TRUE	NIC2	TRUE	276	10643085	15037759	0.7077573859243256	7450810	10137965	0.674167274525413	TRUE	0.591298	C	1e-5	0.015529	0.591298	0.185454	1e-5	1e-5	1e-5	1e-5	0.009696	0.197963	1e-5	FALSE
I	10439544	10725651	CX11276	CX11276	0.9	68	67	68	286107	#C2FF00	9157915	FALSE	NIC2	TRUE	276	10643085	15037759	0.7077573859243256	0	10137965	0.674167274525413	TRUE	0.591298	C	1e-5	0.015529	0.591298	0.185454	1e-5	1e-5	1e-5	1e-5	0.009696	0.197963	1e-5	FALSE
I	10983771	11129435	CX11276	CX11276	0.9	68	69	68	145664	#C2FF00	9157915	FALSE	NIC2	TRUE	276	10643085	15037759	0.7077573859243256	0	10137965	0.674167274525413	TRUE	0.591298	C	1e-5	0.015529	0.591298	0.185454	1e-5	1e-5	1e-5	1e-5	0.009696	0.197963	1e-5	FALSE
I	11167716	11393530	CX11276	CX11276	0.9	68	71	68	225814	#C2FF00	9157915	FALSE	NIC2	TRUE	276	10643085	15037759	0.7077573859243256	0	10137965	0.674167274525413	TRUE	0.591298	C	1e-5	0.015529	0.591298	0.185454	1e-5	1e-5	1e-5	1e-5	0.009696	0.197963	1e-5	FALSE
I	11401676	11428348	CX11276	CX11276	0.9	68	73	68	26672	#C2FF00	9157915	FALSE	NIC2	TRUE	276	10643085	15037759	0.7077573859243256	0	10137965	0.674167274525413	TRUE	0.591298	C	1e-5	0.015529	0.591298	0.185454	1e-5	1e-5	1e-5	1e-5	0.009696	0.197963	1e-5	FALSE
I	11484361	11511424	CX11276	CX11276	0.9	68	75	68	27063	#C2FF00	9157915	FALSE	NIC2	TRUE	276	10643085	15037759	0.7077573859243256	0	10137965	0.674167274525413	TRUE	0.591298	C	1e-5	0.015529	0.591298	0.185454	1e-5	1e-5	1e-5	1e-5	0.009696	0.197963	1e-5	FALSE
I	11562677	11939109	CX11276	CX11276	0.9	68	77	68	376432	#C2FF00	9157915	FALSE	NIC2	TRUE	276	10643085	15037759	0.7077573859243256	0	10137965	0.674167274525413	TRUE	0.591298	C	1e-5	0.015529	0.591298	0.185454	1e-5	1e-5	1e-5	1e-5	0.009696	0.197963	1e-5	FALSE
I	11971316	12020507	CX11276	CX11276	0.9	68	79	68	49191	#C2FF00	9157915	FALSE	NIC2	TRUE	276	10643085	15037759	0.7077573859243256	0	10137965	0.674167274525413	TRUE	0.591298	C	1e-5	0.015529	0.591298	0.185454	1e-5	1e-5	1e-5	1e-5	0.009696	0.197963	1e-5	FALSE
I	12025666	12047871	CX11276	CX11276	0.9	68	81	68	22205	#C2FF00	9157915	FALSE	NIC2	TRUE	276	10643085	15037759	0.7077573859243256	0	10137965	0.674167274525413	TRUE	0.591298	C	1e-5	0.015529	0.591298	0.185454	1e-5	1e-5	1e-5	1e-5	0.009696	0.197963	1e-5	FALSE
I	12143122	12284934	CX11276	CX11276	0.9	68	83	68	141812	#C2FF00	9157915	FALSE	NIC2	TRUE	276	10643085	15037759	0.7077573859243256	0	10137965	0.674167274525413	TRUE	0.591298	C	1e-5	0.015529	0.591298	0.185454	1e-5	1e-5	1e-5	1e-5	0.009696	0.197963	1e-5	FALSE
I	12285568	12354267	CX11276	CX11276	0.9	68	85	68	68699	#C2FF00	9157915	FALSE	NIC2	TRUE	276	10643085	15037759	0.7077573859243256	0	10137965	0.674167274525413	TRUE	0.591298	C	1e-5	0.015529	0.591298	0.185454	1e-5	1e-5	1e-5	1e-5	0.009696	0.197963	1e-5	FALSE
I	12354267	15041422	NIC2	CX11276	1	68	86	1	2687155	#CC0000	2453905988	TRUE	NIC2	TRUE	276	10643085	15037759	0.7077573859243256	2687155	10137965	0.674167274525413	TRUE	0.591298	C	1e-5	0.015529	0.591298	0.185454	1e-5	1e-5	1e-5	1e-5	0.009696	0.197963	1e-5	FALSE
I	72888	881269	ED3048	CX11285	0.9	180	2	4	808381	#CC0B00	150684368	FALSE	NIC2	TRUE	276	10227942	15037759	0.68015067936652	0	9292714	0.6179586998302075	TRUE	0.662305	C	1.1e-5	1e-5	0.662305	1e-5	1e-5	1e-5	1e-5	1e-5	1e-5	0.337604	1e-5	FALSE
I	881269	902069	NIC2	CX11285	1	180	3	1	20800	#CC0000	2453905988	TRUE	NIC2	TRUE	276	10227942	15037759	0.68015067936652	0	9292714	0.6179586998302075	TRUE	0.662305	C	1.1e-5	1e-5	0.662305	1e-5	1e-5	1e-5	1e-5	1e-5	1e-5	0.337604	1e-5	FALSE
I	902069	1024873	ED3048	CX11285	0.9	180	4	4	122804	#CC0B00	150684368	FALSE	NIC2	TRUE	276	10227942	15037759	0.68015067936652	0	9292714	0.6179586998302075	TRUE	0.662305	C	1.1e-5	1e-5	0.662305	1e-5	1e-5	1e-5	1e-5	1e-5	1e-5	0.337604	1e-5	FALSE
I	1024873	1050613	NIC2	CX11285	1	180	5	1	25740	#CC0000	2453905988	TRUE	NIC2	TRUE	276	10227942	15037759	0.68015067936652	0	9292714	0.6179586998302075	TRUE	0.662305	C	1.1e-5	1e-5	0.662305	1e-5	1e-5	1e-5	1e-5	1e-5	1e-5	0.337604	1e-5	FALSE
I	1050613	1091061	ED3048	CX11285	0.9	180	6	4	40448	#CC0B00	150684368	FALSE	NIC2	TRUE	276	10227942	15037759	0.68015067936652	0	9292714	0.6179586998302075	TRUE	0.662305	C	1.1e-5	1e-5	0.662305	1e-5	1e-5	1e-5	1e-5	1e-5	1e-5	0.337604	1e-5	FALSE
I	1091061	1112176	NIC2	CX11285	1	180	7	1	21115	#CC0000	2453905988	TRUE	NIC2	TRUE	276	10227942	15037759	0.68015067936652	0	9292714	0.6179586998302075	TRUE	0.662305	C	1.1e-5	1e-5	0.662305	1e-5	1e-5	1e-5	1e-5	1e-5	1e-5	0.337604	1e-5	FALSE
I	1112176	1190482	ED3048	CX11285	0.9	180	8	4	78306	#CC0B00	150684368	FALSE	NIC2	TRUE	276	10227942	15037759	0.68015067936652	0	9292714	0.6179586998302075	TRUE	0.662305	C	1.1e-5	1e-5	0.662305	1e-5	1e-5	1e-5	1e-5	1e-5	1e-5	0.337604	1e-5	FALSE
I	1190482	1242553	NIC2	CX11285	1	180	9	1	52071	#CC0000	2453905988	TRUE	NIC2	TRUE	276	10227942	15037759	0.68015067936652	0	9292714	0.6179586998302075	TRUE	0.662305	C	1.1e-5	1e-5	0.662305	1e-5	1e-5	1e-5	1e-5	1e-5	1e-5	0.337604	1e-5	FALSE
I	1242553	1344494	ED3048	CX11285	0.9	180	10	4	101941	#CC0B00	150684368	FALSE	NIC2	TRUE	276	10227942	15037759	0.68015067936652	0	9292714	0.6179586998302075	TRUE	0.662305	C	1.1e-5	1e-5	0.662305	1e-5	1e-5	1e-5	1e-5	1e-5	1e-5	0.337604	1e-5	FALSE
I	1344494	1420764	NIC2	CX11285	1	180	11	1	76270	#CC0000	2453905988	TRUE	NIC2	TRUE	276	10227942	15037759	0.68015067936652	0	9292714	0.6179586998302075	TRUE	0.662305	C	1.1e-5	1e-5	0.662305	1e-5	1e-5	1e-5	1e-5	1e-5	1e-5	0.337604	1e-5	FALSE
I	1420764	1486678	ED3048	CX11285	0.9	180	12	4	65914	#CC0B00	150684368	FALSE	NIC2	TRUE	276	10227942	15037759	0.68015067936652	0	9292714	0.6179586998302075	TRUE	0.662305	C	1.1e-5	1e-5	0.662305	1e-5	1e-5	1e-5	1e-5	1e-5	1e-5	0.337604	1e-5	FALSE
I	1486678	1492117	NIC2	CX11285	1	180	13	1	5439	#CC0000	2453905988	TRUE	NIC2	TRUE	276	10227942	15037759	0.68015067936652	0	9292714	0.6179586998302075	TRUE	0.662305	C	1.1e-5	1e-5	0.662305	1e-5	1e-5	1e-5	1e-5	1e-5	1e-5	0.337604	1e-5	FALSE
I	1492117	1496191	CX11271	CX11285	1	180	14	23	4074	#FF6800	5445413	FALSE	NIC2	TRUE	276	10227942	15037759	0.68015067936652	0	9292714	0.6179586998302075	TRUE	0.662305	C	1.1e-5	1e-5	0.662305	1e-5	1e-5	1e-5	1e-5	1e-5	1e-5	0.337604	1e-5	FALSE
I	1496191	1502794	NIC2	CX11285	1	180	15	1	6603	#CC0000	2453905988	TRUE	NIC2	TRUE	276	10227942	15037759	0.68015067936652	0	9292714	0.6179586998302075	TRUE	0.662305	C	1.1e-5	1e-5	0.662305	1e-5	1e-5	1e-5	1e-5	1e-5	1e-5	0.337604	1e-5	FALSE
I	1502794	1611652	CX11271	CX11285	1	180	16	23	108858	#FF6800	5445413	FALSE	NIC2	TRUE	276	10227942	15037759	0.68015067936652	0	9292714	0.6179586998302075	TRUE	0.662305	C	1.1e-5	1e-5	0.662305	1e-5	1e-5	1e-5	1e-5	1e-5	1e-5	0.337604	1e-5	FALSE
I	1611652	1640212	ED3048	CX11285	0.9	180	17	4	28560	#CC0B00	150684368	FALSE	NIC2	TRUE	276	10227942	15037759	0.68015067936652	0	9292714	0.6179586998302075	TRUE	0.662305	C	1.1e-5	1e-5	0.662305	1e-5	1e-5	1e-5	1e-5	1e-5	1e-5	0.337604	1e-5	FALSE
I	1640212	1660874	NIC2	CX11285	1	180	18	1	20662	#CC0000	2453905988	TRUE	NIC2	TRUE	276	10227942	15037759	0.68015067936652	0	9292714	0.6179586998302075	TRUE	0.662305	C	1.1e-5	1e-5	0.662305	1e-5	1e-5	1e-5	1e-5	1e-5	1e-5	0.337604	1e-5	FALSE
I	1660874	1664148	ED3048	CX11285	0.9	180	19	4	3274	#CC0B00	150684368	FALSE	NIC2	TRUE	276	10227942	15037759	0.68015067936652	0	9292714	0.6179586998302075	TRUE	0.662305	C	1.1e-5	1e-5	0.662305	1e-5	1e-5	1e-5	1e-5	1e-5	1e-5	0.337604	1e-5	FALSE
I	1664148	1704321	MY920	CX11285	0.9	180	20	12	40173	#FF8566	22692122	FALSE	NIC2	TRUE	276	10227942	15037759	0.68015067936652	0	9292714	0.6179586998302075	TRUE	0.662305	C	1.1e-5	1e-5	0.662305	1e-5	1e-5	1e-5	1e-5	1e-5	1e-5	0.337604	1e-5	FALSE
I	1704321	1712160	ED3048	CX11285	0.9	180	21	4	7839	#CC0B00	150684368	FALSE	NIC2	TRUE	276	10227942	15037759	0.68015067936652	0	9292714	0.6179586998302075	TRUE	0.662305	C	1.1e-5	1e-5	0.662305	1e-5	1e-5	1e-5	1e-5	1e-5	1e-5	0.337604	1e-5	FALSE
I	1712160	1752731	MY920	CX11285	0.9	180	22	12	40571	#FF8566	22692122	FALSE	NIC2	TRUE	276	10227942	15037759	0.68015067936652	0	9292714	0.6179586998302075	TRUE	0.662305	C	1.1e-5	1e-5	0.662305	1e-5	1e-5	1e-5	1e-5	1e-5	1e-5	0.337604	1e-5	FALSE
I	1752731	1755383	NIC2	CX11285	1	180	23	1	2652	#CC0000	2453905988	TRUE	NIC2	TRUE	276	10227942	15037759	0.68015067936652	0	9292714	0.6179586998302075	TRUE	0.662305	C	1.1e-5	1e-5	0.662305	1e-5	1e-5	1e-5	1e-5	1e-5	1e-5	0.337604	1e-5	FALSE
I	1755383	1791536	MY920	CX11285	0.9	180	24	12	36153	#FF8566	22692122	FALSE	NIC2	TRUE	276	10227942	15037759	0.68015067936652	0	9292714	0.6179586998302075	TRUE	0.662305	C	1.1e-5	1e-5	0.662305	1e-5	1e-5	1e-5	1e-5	1e-5	1e-5	0.337604	1e-5	FALSE
I	1791536	1842842	NIC242	CX11285	0.9	180	25	40	51306	#CC9300	23039935	FALSE	NIC2	TRUE	276	10227942	15037759	0.68015067936652	0	9292714	0.6179586998302075	TRUE	0.662305	C	1.1e-5	1e-5	0.662305	1e-5	1e-5	1e-5	1e-5	1e-5	1e-5	0.337604	1e-5	FALSE
I	1842842	1845052	NIC275	CX11285	1	180	26	27	2210	#FFB066	13184509	FALSE	NIC2	TRUE	276	10227942	15037759	0.68015067936652	0	9292714	0.6179586998302075	TRUE	0.662305	C	1.1e-5	1e-5	0.662305	1e-5	1e-5	1e-5	1e-5	1e-5	1e-5	0.337604	1e-5	FALSE
I	1845052	1851727	NIC242	CX11285	0.9	180	27	40	6675	#CC9300	23039935	FALSE	NIC2	TRUE	276	10227942	15037759	0.68015067936652	0	9292714	0.6179586998302075	TRUE	0.662305	C	1.1e-5	1e-5	0.662305	1e-5	1e-5	1e-5	1e-5	1e-5	1e-5	0.337604	1e-5	FALSE
I	1851727	1874368	MY920	CX11285	0.9	180	28	12	22641	#FF8566	22692122	FALSE	NIC2	TRUE	276	10227942	15037759	0.68015067936652	0	9292714	0.6179586998302075	TRUE	0.662305	C	1.1e-5	1e-5	0.662305	1e-5	1e-5	1e-5	1e-5	1e-5	1e-5	0.337604	1e-5	FALSE
I	1874368	1882103	NIC277	CX11285	1	180	29	39	7735	#FFD166	16231262	FALSE	NIC2	TRUE	276	10227942	15037759	0.68015067936652	0	9292714	0.6179586998302075	TRUE	0.662305	C	1.1e-5	1e-5	0.662305	1e-5	1e-5	1e-5	1e-5	1e-5	1e-5	0.337604	1e-5	FALSE
I	1882103	1988317	NIC2	CX11285	1	180	30	1	106214	#CC0000	2453905988	TRUE	NIC2	TRUE	276	10227942	15037759	0.68015067936652	0	9292714	0.6179586998302075	TRUE	0.662305	C	1.1e-5	1e-5	0.662305	1e-5	1e-5	1e-5	1e-5	1e-5	1e-5	0.337604	1e-5	FALSE
I	1988317	1988890	NIC277	CX11285	1	180	31	39	573	#FFD166	16231262	FALSE	NIC2	TRUE	276	10227942	15037759	0.68015067936652	0	9292714	0.6179586998302075	TRUE	0.662305	C	1.1e-5	1e-5	0.662305	1e-5	1e-5	1e-5	1e-5	1e-5	1e-5	0.337604	1e-5	FALSE
I	1988890	2007906	NIC2	CX11285	1	180	32	1	19016	#CC0000	2453905988	TRUE	NIC2	TRUE	276	10227942	15037759	0.68015067936652	0	9292714	0.6179586998302075	TRUE	0.662305	C	1.1e-5	1e-5	0.662305	1e-5	1e-5	1e-5	1e-5	1e-5	1e-5	0.337604	1e-5	FALSE
I	2007906	2183457	NIC242	CX11285	0.9	180	33	40	175551	#CC9300	23039935	FALSE	NIC2	TRUE	276	10227942	15037759	0.68015067936652	0	9292714	0.6179586998302075	TRUE	0.662305	C	1.1e-5	1e-5	0.662305	1e-5	1e-5	1e-5	1e-5	1e-5	1e-5	0.337604	1e-5	FALSE
I	2183457	2183628	NIC275	CX11285	1	180	34	27	171	#FFB066	13184509	FALSE	NIC2	TRUE	276	10227942	15037759	0.68015067936652	0	9292714	0.6179586998302075	TRUE	0.662305	C	1.1e-5	1e-5	0.662305	1e-5	1e-5	1e-5	1e-5	1e-5	1e-5	0.337604	1e-5	FALSE
I	2183628	2189422	MY920	CX11285	0.9	180	35	12	5794	#FF8566	22692122	FALSE	NIC2	TRUE	276	10227942	15037759	0.68015067936652	0	9292714	0.6179586998302075	TRUE	0.662305	C	1.1e-5	1e-5	0.662305	1e-5	1e-5	1e-5	1e-5	1e-5	1e-5	0.337604	1e-5	FALSE
I	2189422	2190339	ED3048	CX11285	0.9	180	36	4	917	#CC0B00	150684368	FALSE	NIC2	TRUE	276	10227942	15037759	0.68015067936652	0	9292714	0.6179586998302075	TRUE	0.662305	C	1.1e-5	1e-5	0.662305	1e-5	1e-5	1e-5	1e-5	1e-5	1e-5	0.337604	1e-5	FALSE
I	2190339	2191480	NIC2	CX11285	1	180	37	1	1141	#CC0000	2453905988	TRUE	NIC2	TRUE	276	10227942	15037759	0.68015067936652	0	9292714	0.6179586998302075	TRUE	0.662305	C	1.1e-5	1e-5	0.662305	1e-5	1e-5	1e-5	1e-5	1e-5	1e-5	0.337604	1e-5	FALSE
I	2191480	2199931	NIC242	CX11285	0.9	180	38	40	8451	#CC9300	23039935	FALSE	NIC2	TRUE	276	10227942	15037759	0.68015067936652	0	9292714	0.6179586998302075	TRUE	0.662305	C	1.1e-5	1e-5	0.662305	1e-5	1e-5	1e-5	1e-5	1e-5	1e-5	0.337604	1e-5	FALSE
I	2199931	2204010	NIC2	CX11285	1	180	39	1	4079	#CC0000	2453905988	TRUE	NIC2	TRUE	276	10227942	15037759	0.68015067936652	0	9292714	0.6179586998302075	TRUE	0.662305	C	1.1e-5	1e-5	0.662305	1e-5	1e-5	1e-5	1e-5	1e-5	1e-5	0.337604	1e-5	FALSE
I	2204010	2465076	ED3048	CX11285	0.9	180	40	4	261066	#CC0B00	150684368	FALSE	NIC2	TRUE	276	10227942	15037759	0.68015067936652	0	9292714	0.6179586998302075	TRUE	0.662305	C	1.1e-5	1e-5	0.662305	1e-5	1e-5	1e-5	1e-5	1e-5	1e-5	0.337604	1e-5	FALSE
I	2465076	2468912	NIC2	CX11285	1	180	41	1	3836	#CC0000	2453905988	TRUE	NIC2	TRUE	276	10227942	15037759	0.68015067936652	0	9292714	0.6179586998302075	TRUE	0.662305	C	1.1e-5	1e-5	0.662305	1e-5	1e-5	1e-5	1e-5	1e-5	1e-5	0.337604	1e-5	FALSE
I	2468912	2500102	ED3048	CX11285	0.9	180	42	4	31190	#CC0B00	150684368	FALSE	NIC2	TRUE	276	10227942	15037759	0.68015067936652	0	9292714	0.6179586998302075	TRUE	0.662305	C	1.1e-5	1e-5	0.662305	1e-5	1e-5	1e-5	1e-5	1e-5	1e-5	0.337604	1e-5	FALSE
I	2500102	2513751	NIC2	CX11285	1	180	43	1	13649	#CC0000	2453905988	TRUE	NIC2	TRUE	276	10227942	15037759	0.68015067936652	0	9292714	0.6179586998302075	TRUE	0.662305	C	1.1e-5	1e-5	0.662305	1e-5	1e-5	1e-5	1e-5	1e-5	1e-5	0.337604	1e-5	FALSE
I	2513751	2576070	ED3048	CX11285	0.9	180	44	4	62319	#CC0B00	150684368	FALSE	NIC2	TRUE	276	10227942	15037759	0.68015067936652	0	9292714	0.6179586998302075	TRUE	0.662305	C	1.1e-5	1e-5	0.662305	1e-5	1e-5	1e-5	1e-5	1e-5	1e-5	0.337604	1e-5	FALSE
I	2576070	2785019	NIC2	CX11285	1	180	45	1	208949	#CC0000	2453905988	TRUE	NIC2	TRUE	276	10227942	15037759	0.68015067936652	0	9292714	0.6179586998302075	TRUE	0.662305	C	1.1e-5	1e-5	0.662305	1e-5	1e-5	1e-5	1e-5	1e-5	1e-5	0.337604	1e-5	FALSE
I	2785019	2864069	ED3048	CX11285	0.9	180	46	4	79050	#CC0B00	150684368	FALSE	NIC2	TRUE	276	10227942	15037759	0.68015067936652	0	9292714	0.6179586998302075	TRUE	0.662305	C	1.1e-5	1e-5	0.662305	1e-5	1e-5	1e-5	1e-5	1e-5	1e-5	0.337604	1e-5	FALSE
I	2864069	2866511	NIC2	CX11285	1	180	47	1	2442	#CC0000	2453905988	TRUE	NIC2	TRUE	276	10227942	15037759	0.68015067936652	0	9292714	0.6179586998302075	TRUE	0.662305	C	1.1e-5	1e-5	0.662305	1e-5	1e-5	1e-5	1e-5	1e-5	1e-5	0.337604	1e-5	FALSE
I	2866511	2867958	ED3048	CX11285	0.9	180	48	4	1447	#CC0B00	150684368	FALSE	NIC2	TRUE	276	10227942	15037759	0.68015067936652	0	9292714	0.6179586998302075	TRUE	0.662305	C	1.1e-5	1e-5	0.662305	1e-5	1e-5	1e-5	1e-5	1e-5	1e-5	0.337604	1e-5	FALSE
I	2867958	9946989	NIC2	CX11285	1	180	49	1	7079031	#CC0000	2453905988	TRUE	NIC2	TRUE	276	10227942	15037759	0.68015067936652	7079031	9292714	0.6179586998302075	TRUE	0.662305	C	1.1e-5	1e-5	0.662305	1e-5	1e-5	1e-5	1e-5	1e-5	1e-5	0.337604	1e-5	FALSE
I	9946989	10351020	EG4347	CX11285	1	180	50	5	404031	#FF1300	122541644	FALSE	NIC2	TRUE	276	10227942	15037759	0.68015067936652	0	9292714	0.6179586998302075	TRUE	0.662305	C	1.1e-5	1e-5	0.662305	1e-5	1e-5	1e-5	1e-5	1e-5	1e-5	0.337604	1e-5	FALSE
I	10351020	10354853	NIC2	CX11285	1	180	51	1	3833	#CC0000	2453905988	TRUE	NIC2	TRUE	276	10227942	15037759	0.68015067936652	0	9292714	0.6179586998302075	TRUE	0.662305	C	1.1e-5	1e-5	0.662305	1e-5	1e-5	1e-5	1e-5	1e-5	1e-5	0.337604	1e-5	FALSE
I	10354853	10634911	EG4347	CX11285	1	180	52	5	280058	#FF1300	122541644	FALSE	NIC2	TRUE	276	10227942	15037759	0.68015067936652	0	9292714	0.6179586998302075	TRUE	0.662305	C	1.1e-5	1e-5	0.662305	1e-5	1e-5	1e-5	1e-5	1e-5	1e-5	0.337604	1e-5	FALSE
I	10634911	10639190	NIC2	CX11285	1	180	53	1	4279	#CC0000	2453905988	TRUE	NIC2	TRUE	276	10227942	15037759	0.68015067936652	0	9292714	0.6179586998302075	TRUE	0.662305	C	1.1e-5	1e-5	0.662305	1e-5	1e-5	1e-5	1e-5	1e-5	1e-5	0.337604	1e-5	FALSE
I	10639190	10883065	EG4347	CX11285	1	180	54	5	243875	#FF1300	122541644	FALSE	NIC2	TRUE	276	10227942	15037759	0.68015067936652	0	9292714	0.6179586998302075	TRUE	0.662305	C	1.1e-5	1e-5	0.662305	1e-5	1e-5	1e-5	1e-5	1e-5	1e-5	0.337604	1e-5	FALSE
I	10883065	10908578	NIC2	CX11285	1	180	55	1	25513	#CC0000	2453905988	TRUE	NIC2	TRUE	276	10227942	15037759	0.68015067936652	0	9292714	0.6179586998302075	TRUE	0.662305	C	1.1e-5	1e-5	0.662305	1e-5	1e-5	1e-5	1e-5	1e-5	1e-5	0.337604	1e-5	FALSE
I	10908578	11396234	EG4347	CX11285	1	180	56	5	487656	#FF1300	122541644	FALSE	NIC2	TRUE	276	10227942	15037759	0.68015067936652	0	9292714	0.6179586998302075	TRUE	0.662305	C	1.1e-5	1e-5	0.662305	1e-5	1e-5	1e-5	1e-5	1e-5	1e-5	0.337604	1e-5	FALSE
I	11396234	11460051	NIC2	CX11285	1	180	57	1	63817	#CC0000	2453905988	TRUE	NIC2	TRUE	276	10227942	15037759	0.68015067936652	0	9292714	0.6179586998302075	TRUE	0.662305	C	1.1e-5	1e-5	0.662305	1e-5	1e-5	1e-5	1e-5	1e-5	1e-5	0.337604	1e-5	FALSE
I	11460051	11503320	EG4347	CX11285	1	180	58	5	43269	#FF1300	122541644	FALSE	NIC2	TRUE	276	10227942	15037759	0.68015067936652	0	9292714	0.6179586998302075	TRUE	0.662305	C	1.1e-5	1e-5	0.662305	1e-5	1e-5	1e-5	1e-5	1e-5	1e-5	0.337604	1e-5	FALSE
I	11503320	11551724	NIC2	CX11285	1	180	59	1	48404	#CC0000	2453905988	TRUE	NIC2	TRUE	276	10227942	15037759	0.68015067936652	0	9292714	0.6179586998302075	TRUE	0.662305	C	1.1e-5	1e-5	0.662305	1e-5	1e-5	1e-5	1e-5	1e-5	1e-5	0.337604	1e-5	FALSE
I	11551724	12236997	EG4347	CX11285	1	180	60	5	685273	#FF1300	122541644	FALSE	NIC2	TRUE	276	10227942	15037759	0.68015067936652	0	9292714	0.6179586998302075	TRUE	0.662305	C	1.1e-5	1e-5	0.662305	1e-5	1e-5	1e-5	1e-5	1e-5	1e-5	0.337604	1e-5	FALSE
I	12236997	12435701	NIC2	CX11285	1	180	61	1	198704	#CC0000	2453905988	TRUE	NIC2	TRUE	276	10227942	15037759	0.68015067936652	0	9292714	0.6179586998302075	TRUE	0.662305	C	1.1e-5	1e-5	0.662305	1e-5	1e-5	1e-5	1e-5	1e-5	1e-5	0.337604	1e-5	FALSE
I	12435701	12618732	EG4347	CX11285	1	180	62	5	183031	#FF1300	122541644	FALSE	NIC2	TRUE	276	10227942	15037759	0.68015067936652	0	9292714	0.6179586998302075	TRUE	0.662305	C	1.1e-5	1e-5	0.662305	1e-5	1e-5	1e-5	1e-5	1e-5	1e-5	0.337604	1e-5	FALSE
I	12618732	14832415	NIC2	CX11285	1	180	63	1	2213683	#CC0000	2453905988	TRUE	NIC2	TRUE	276	10227942	15037759	0.68015067936652	2213683	9292714	0.6179586998302075	TRUE	0.662305	C	1.1e-5	1e-5	0.662305	1e-5	1e-5	1e-5	1e-5	1e-5	1e-5	0.337604	1e-5	FALSE
I	14832415	15041422	CX11271	CX11285	1	180	64	23	209007	#FF6800	5445413	FALSE	NIC2	TRUE	276	10227942	15037759	0.68015067936652	0	9292714	0.6179586998302075	TRUE	0.662305	C	1.1e-5	1e-5	0.662305	1e-5	1e-5	1e-5	1e-5	1e-5	1e-5	0.337604	1e-5	FALSE
I	3663	448892	QG536	CX11292	1	29	1	7	445229	#CC1700	59985814	FALSE	NIC2	TRUE	276	9159000	15037759	0.6090668164052901	0	7800462	0.5187250307708748	TRUE	0.727048	C	1e-5	1e-5	0.727048	0.272862	1e-5	1e-5	1e-5	1e-5	1e-5	1e-5	1e-5	FALSE
I	448892	528414	ED3048	CX11292	0.9	29	2	4	79522	#CC0B00	150684368	FALSE	NIC2	TRUE	276	9159000	15037759	0.6090668164052901	0	7800462	0.5187250307708748	TRUE	0.727048	C	1e-5	1e-5	0.727048	0.272862	1e-5	1e-5	1e-5	1e-5	1e-5	1e-5	1e-5	FALSE
I	528414	835064	QG536	CX11292	1	29	3	7	306650	#CC1700	59985814	FALSE	NIC2	TRUE	276	9159000	15037759	0.6090668164052901	0	7800462	0.5187250307708748	TRUE	0.727048	C	1e-5	1e-5	0.727048	0.272862	1e-5	1e-5	1e-5	1e-5	1e-5	1e-5	1e-5	FALSE
I	835064	843028	ED3048	CX11292	0.9	29	4	4	7964	#CC0B00	150684368	FALSE	NIC2	TRUE	276	9159000	15037759	0.6090668164052901	0	7800462	0.5187250307708748	TRUE	0.727048	C	1e-5	1e-5	0.727048	0.272862	1e-5	1e-5	1e-5	1e-5	1e-5	1e-5	1e-5	FALSE
I	843028	844068	QG536	CX11292	1	29	5	7	1040	#CC1700	59985814	FALSE	NIC2	TRUE	276	9159000	15037759	0.6090668164052901	0	7800462	0.5187250307708748	TRUE	0.727048	C	1e-5	1e-5	0.727048	0.272862	1e-5	1e-5	1e-5	1e-5	1e-5	1e-5	1e-5	FALSE
I	844068	864435	NIC2	CX11292	1	29	6	1	20367	#CC0000	2453905988	TRUE	NIC2	TRUE	276	9159000	15037759	0.6090668164052901	0	7800462	0.5187250307708748	TRUE	0.727048	C	1e-5	1e-5	0.727048	0.272862	1e-5	1e-5	1e-5	1e-5	1e-5	1e-5	1e-5	FALSE
I	864435	1017980	QG536	CX11292	1	29	7	7	153545	#CC1700	59985814	FALSE	NIC2	TRUE	276	9159000	15037759	0.6090668164052901	0	7800462	0.5187250307708748	TRUE	0.727048	C	1e-5	1e-5	0.727048	0.272862	1e-5	1e-5	1e-5	1e-5	1e-5	1e-5	1e-5	FALSE
I	1017980	1049837	NIC2	CX11292	1	29	8	1	31857	#CC0000	2453905988	TRUE	NIC2	TRUE	276	9159000	15037759	0.6090668164052901	0	7800462	0.5187250307708748	TRUE	0.727048	C	1e-5	1e-5	0.727048	0.272862	1e-5	1e-5	1e-5	1e-5	1e-5	1e-5	1e-5	FALSE
I	1049837	1091061	QG536	CX11292	1	29	9	7	41224	#CC1700	59985814	FALSE	NIC2	TRUE	276	9159000	15037759	0.6090668164052901	0	7800462	0.5187250307708748	TRUE	0.727048	C	1e-5	1e-5	0.727048	0.272862	1e-5	1e-5	1e-5	1e-5	1e-5	1e-5	1e-5	FALSE
I	1091061	1136414	NIC2	CX11292	1	29	10	1	45353	#CC0000	2453905988	TRUE	NIC2	TRUE	276	9159000	15037759	0.6090668164052901	0	7800462	0.5187250307708748	TRUE	0.727048	C	1e-5	1e-5	0.727048	0.272862	1e-5	1e-5	1e-5	1e-5	1e-5	1e-5	1e-5	FALSE
I	1136414	1150297	QG536	CX11292	1	29	11	7	13883	#CC1700	59985814	FALSE	NIC2	TRUE	276	9159000	15037759	0.6090668164052901	0	7800462	0.5187250307708748	TRUE	0.727048	C	1e-5	1e-5	0.727048	0.272862	1e-5	1e-5	1e-5	1e-5	1e-5	1e-5	1e-5	FALSE
I	1150297	1175482	ED3048	CX11292	0.9	29	12	4	25185	#CC0B00	150684368	FALSE	NIC2	TRUE	276	9159000	15037759	0.6090668164052901	0	7800462	0.5187250307708748	TRUE	0.727048	C	1e-5	1e-5	0.727048	0.272862	1e-5	1e-5	1e-5	1e-5	1e-5	1e-5	1e-5	FALSE
I	1175482	1182670	QG536	CX11292	1	29	13	7	7188	#CC1700	59985814	FALSE	NIC2	TRUE	276	9159000	15037759	0.6090668164052901	0	7800462	0.5187250307708748	TRUE	0.727048	C	1e-5	1e-5	0.727048	0.272862	1e-5	1e-5	1e-5	1e-5	1e-5	1e-5	1e-5	FALSE
I	1182670	1190482	ED3048	CX11292	0.9	29	14	4	7812	#CC0B00	150684368	FALSE	NIC2	TRUE	276	9159000	15037759	0.6090668164052901	0	7800462	0.5187250307708748	TRUE	0.727048	C	1e-5	1e-5	0.727048	0.272862	1e-5	1e-5	1e-5	1e-5	1e-5	1e-5	1e-5	FALSE
I	1190482	1242553	NIC2	CX11292	1	29	15	1	52071	#CC0000	2453905988	TRUE	NIC2	TRUE	276	9159000	15037759	0.6090668164052901	0	7800462	0.5187250307708748	TRUE	0.727048	C	1e-5	1e-5	0.727048	0.272862	1e-5	1e-5	1e-5	1e-5	1e-5	1e-5	1e-5	FALSE
I	1242553	1344494	ED3048	CX11292	0.9	29	16	4	101941	#CC0B00	150684368	FALSE	NIC2	TRUE	276	9159000	15037759	0.6090668164052901	0	7800462	0.5187250307708748	TRUE	0.727048	C	1e-5	1e-5	0.727048	0.272862	1e-5	1e-5	1e-5	1e-5	1e-5	1e-5	1e-5	FALSE
I	1344494	1420764	NIC2	CX11292	1	29	17	1	76270	#CC0000	2453905988	TRUE	NIC2	TRUE	276	9159000	15037759	0.6090668164052901	0	7800462	0.5187250307708748	TRUE	0.727048	C	1e-5	1e-5	0.727048	0.272862	1e-5	1e-5	1e-5	1e-5	1e-5	1e-5	1e-5	FALSE
I	1420764	1443616	ED3048	CX11292	0.9	29	18	4	22852	#CC0B00	150684368	FALSE	NIC2	TRUE	276	9159000	15037759	0.6090668164052901	0	7800462	0.5187250307708748	TRUE	0.727048	C	1e-5	1e-5	0.727048	0.272862	1e-5	1e-5	1e-5	1e-5	1e-5	1e-5	1e-5	FALSE
I	1443616	1454609	QG536	CX11292	1	29	19	7	10993	#CC1700	59985814	FALSE	NIC2	TRUE	276	9159000	15037759	0.6090668164052901	0	7800462	0.5187250307708748	TRUE	0.727048	C	1e-5	1e-5	0.727048	0.272862	1e-5	1e-5	1e-5	1e-5	1e-5	1e-5	1e-5	FALSE
I	1454609	1463349	NIC2	CX11292	1	29	20	1	8740	#CC0000	2453905988	TRUE	NIC2	TRUE	276	9159000	15037759	0.6090668164052901	0	7800462	0.5187250307708748	TRUE	0.727048	C	1e-5	1e-5	0.727048	0.272862	1e-5	1e-5	1e-5	1e-5	1e-5	1e-5	1e-5	FALSE
I	1463349	1486678	QG536	CX11292	1	29	21	7	23329	#CC1700	59985814	FALSE	NIC2	TRUE	276	9159000	15037759	0.6090668164052901	0	7800462	0.5187250307708748	TRUE	0.727048	C	1e-5	1e-5	0.727048	0.272862	1e-5	1e-5	1e-5	1e-5	1e-5	1e-5	1e-5	FALSE
I	1486678	1610423	NIC2	CX11292	1	29	22	1	123745	#CC0000	2453905988	TRUE	NIC2	TRUE	276	9159000	15037759	0.6090668164052901	0	7800462	0.5187250307708748	TRUE	0.727048	C	1e-5	1e-5	0.727048	0.272862	1e-5	1e-5	1e-5	1e-5	1e-5	1e-5	1e-5	FALSE
I	1610423	1640212	ED3048	CX11292	0.9	29	23	4	29789	#CC0B00	150684368	FALSE	NIC2	TRUE	276	9159000	15037759	0.6090668164052901	0	7800462	0.5187250307708748	TRUE	0.727048	C	1e-5	1e-5	0.727048	0.272862	1e-5	1e-5	1e-5	1e-5	1e-5	1e-5	1e-5	FALSE
I	1640212	1660874	NIC2	CX11292	1	29	24	1	20662	#CC0000	2453905988	TRUE	NIC2	TRUE	276	9159000	15037759	0.6090668164052901	0	7800462	0.5187250307708748	TRUE	0.727048	C	1e-5	1e-5	0.727048	0.272862	1e-5	1e-5	1e-5	1e-5	1e-5	1e-5	1e-5	FALSE
I	1660874	1750821	ED3048	CX11292	0.9	29	25	4	89947	#CC0B00	150684368	FALSE	NIC2	TRUE	276	9159000	15037759	0.6090668164052901	0	7800462	0.5187250307708748	TRUE	0.727048	C	1e-5	1e-5	0.727048	0.272862	1e-5	1e-5	1e-5	1e-5	1e-5	1e-5	1e-5	FALSE
I	1750821	1781567	NIC2	CX11292	1	29	26	1	30746	#CC0000	2453905988	TRUE	NIC2	TRUE	276	9159000	15037759	0.6090668164052901	0	7800462	0.5187250307708748	TRUE	0.727048	C	1e-5	1e-5	0.727048	0.272862	1e-5	1e-5	1e-5	1e-5	1e-5	1e-5	1e-5	FALSE
I	1781567	1825779	ED3048	CX11292	0.9	29	27	4	44212	#CC0B00	150684368	FALSE	NIC2	TRUE	276	9159000	15037759	0.6090668164052901	0	7800462	0.5187250307708748	TRUE	0.727048	C	1e-5	1e-5	0.727048	0.272862	1e-5	1e-5	1e-5	1e-5	1e-5	1e-5	1e-5	FALSE
I	1825779	1829697	NIC2	CX11292	1	29	28	1	3918	#CC0000	2453905988	TRUE	NIC2	TRUE	276	9159000	15037759	0.6090668164052901	0	7800462	0.5187250307708748	TRUE	0.727048	C	1e-5	1e-5	0.727048	0.272862	1e-5	1e-5	1e-5	1e-5	1e-5	1e-5	1e-5	FALSE
I	1829697	1851727	ED3048	CX11292	0.9	29	29	4	22030	#CC0B00	150684368	FALSE	NIC2	TRUE	276	9159000	15037759	0.6090668164052901	0	7800462	0.5187250307708748	TRUE	0.727048	C	1e-5	1e-5	0.727048	0.272862	1e-5	1e-5	1e-5	1e-5	1e-5	1e-5	1e-5	FALSE
I	1851727	1874368	NIC2	CX11292	1	29	30	1	22641	#CC0000	2453905988	TRUE	NIC2	TRUE	276	9159000	15037759	0.6090668164052901	0	7800462	0.5187250307708748	TRUE	0.727048	C	1e-5	1e-5	0.727048	0.272862	1e-5	1e-5	1e-5	1e-5	1e-5	1e-5	1e-5	FALSE
I	1874368	1881920	ED3048	CX11292	0.9	29	31	4	7552	#CC0B00	150684368	FALSE	NIC2	TRUE	276	9159000	15037759	0.6090668164052901	0	7800462	0.5187250307708748	TRUE	0.727048	C	1e-5	1e-5	0.727048	0.272862	1e-5	1e-5	1e-5	1e-5	1e-5	1e-5	1e-5	FALSE
I	1881920	1913957	NIC2	CX11292	1	29	32	1	32037	#CC0000	2453905988	TRUE	NIC2	TRUE	276	9159000	15037759	0.6090668164052901	0	7800462	0.5187250307708748	TRUE	0.727048	C	1e-5	1e-5	0.727048	0.272862	1e-5	1e-5	1e-5	1e-5	1e-5	1e-5	1e-5	FALSE
I	1913957	1922747	ED3048	CX11292	0.9	29	33	4	8790	#CC0B00	150684368	FALSE	NIC2	TRUE	276	9159000	15037759	0.6090668164052901	0	7800462	0.5187250307708748	TRUE	0.727048	C	1e-5	1e-5	0.727048	0.272862	1e-5	1e-5	1e-5	1e-5	1e-5	1e-5	1e-5	FALSE
I	1922747	1974234	NIC2	CX11292	1	29	34	1	51487	#CC0000	2453905988	TRUE	NIC2	TRUE	276	9159000	15037759	0.6090668164052901	0	7800462	0.5187250307708748	TRUE	0.727048	C	1e-5	1e-5	0.727048	0.272862	1e-5	1e-5	1e-5	1e-5	1e-5	1e-5	1e-5	FALSE
I	1974234	1981352	ED3048	CX11292	0.9	29	35	4	7118	#CC0B00	150684368	FALSE	NIC2	TRUE	276	9159000	15037759	0.6090668164052901	0	7800462	0.5187250307708748	TRUE	0.727048	C	1e-5	1e-5	0.727048	0.272862	1e-5	1e-5	1e-5	1e-5	1e-5	1e-5	1e-5	FALSE
I	1981352	2040543	NIC2	CX11292	1	29	36	1	59191	#CC0000	2453905988	TRUE	NIC2	TRUE	276	9159000	15037759	0.6090668164052901	0	7800462	0.5187250307708748	TRUE	0.727048	C	1e-5	1e-5	0.727048	0.272862	1e-5	1e-5	1e-5	1e-5	1e-5	1e-5	1e-5	FALSE
I	2040543	2161780	ED3048	CX11292	0.9	29	37	4	121237	#CC0B00	150684368	FALSE	NIC2	TRUE	276	9159000	15037759	0.6090668164052901	0	7800462	0.5187250307708748	TRUE	0.727048	C	1e-5	1e-5	0.727048	0.272862	1e-5	1e-5	1e-5	1e-5	1e-5	1e-5	1e-5	FALSE
I	2161780	2176348	NIC2	CX11292	1	29	38	1	14568	#CC0000	2453905988	TRUE	NIC2	TRUE	276	9159000	15037759	0.6090668164052901	0	7800462	0.5187250307708748	TRUE	0.727048	C	1e-5	1e-5	0.727048	0.272862	1e-5	1e-5	1e-5	1e-5	1e-5	1e-5	1e-5	FALSE
I	2176348	2190339	ED3048	CX11292	0.9	29	39	4	13991	#CC0B00	150684368	FALSE	NIC2	TRUE	276	9159000	15037759	0.6090668164052901	0	7800462	0.5187250307708748	TRUE	0.727048	C	1e-5	1e-5	0.727048	0.272862	1e-5	1e-5	1e-5	1e-5	1e-5	1e-5	1e-5	FALSE
I	2190339	2204010	NIC2	CX11292	1	29	40	1	13671	#CC0000	2453905988	TRUE	NIC2	TRUE	276	9159000	15037759	0.6090668164052901	0	7800462	0.5187250307708748	TRUE	0.727048	C	1e-5	1e-5	0.727048	0.272862	1e-5	1e-5	1e-5	1e-5	1e-5	1e-5	1e-5	FALSE
I	2204010	2465076	ED3048	CX11292	0.9	29	41	4	261066	#CC0B00	150684368	FALSE	NIC2	TRUE	276	9159000	15037759	0.6090668164052901	0	7800462	0.5187250307708748	TRUE	0.727048	C	1e-5	1e-5	0.727048	0.272862	1e-5	1e-5	1e-5	1e-5	1e-5	1e-5	1e-5	FALSE
I	2465076	2468912	NIC2	CX11292	1	29	42	1	3836	#CC0000	2453905988	TRUE	NIC2	TRUE	276	9159000	15037759	0.6090668164052901	0	7800462	0.5187250307708748	TRUE	0.727048	C	1e-5	1e-5	0.727048	0.272862	1e-5	1e-5	1e-5	1e-5	1e-5	1e-5	1e-5	FALSE
I	2468912	2500102	ED3048	CX11292	0.9	29	43	4	31190	#CC0B00	150684368	FALSE	NIC2	TRUE	276	9159000	15037759	0.6090668164052901	0	7800462	0.5187250307708748	TRUE	0.727048	C	1e-5	1e-5	0.727048	0.272862	1e-5	1e-5	1e-5	1e-5	1e-5	1e-5	1e-5	FALSE
I	2500102	2513751	NIC2	CX11292	1	29	44	1	13649	#CC0000	2453905988	TRUE	NIC2	TRUE	276	9159000	15037759	0.6090668164052901	0	7800462	0.5187250307708748	TRUE	0.727048	C	1e-5	1e-5	0.727048	0.272862	1e-5	1e-5	1e-5	1e-5	1e-5	1e-5	1e-5	FALSE
I	2513751	2576070	ED3048	CX11292	0.9	29	45	4	62319	#CC0B00	150684368	FALSE	NIC2	TRUE	276	9159000	15037759	0.6090668164052901	0	7800462	0.5187250307708748	TRUE	0.727048	C	1e-5	1e-5	0.727048	0.272862	1e-5	1e-5	1e-5	1e-5	1e-5	1e-5	1e-5	FALSE
I	2576070	2785019	NIC2	CX11292	1	29	46	1	208949	#CC0000	2453905988	TRUE	NIC2	TRUE	276	9159000	15037759	0.6090668164052901	0	7800462	0.5187250307708748	TRUE	0.727048	C	1e-5	1e-5	0.727048	0.272862	1e-5	1e-5	1e-5	1e-5	1e-5	1e-5	1e-5	FALSE
I	2785019	2864069	ED3048	CX11292	0.9	29	47	4	79050	#CC0B00	150684368	FALSE	NIC2	TRUE	276	9159000	15037759	0.6090668164052901	0	7800462	0.5187250307708748	TRUE	0.727048	C	1e-5	1e-5	0.727048	0.272862	1e-5	1e-5	1e-5	1e-5	1e-5	1e-5	1e-5	FALSE
I	2864069	2866511	NIC2	CX11292	1	29	48	1	2442	#CC0000	2453905988	TRUE	NIC2	TRUE	276	9159000	15037759	0.6090668164052901	0	7800462	0.5187250307708748	TRUE	0.727048	C	1e-5	1e-5	0.727048	0.272862	1e-5	1e-5	1e-5	1e-5	1e-5	1e-5	1e-5	FALSE
I	2866511	2867958	ED3048	CX11292	0.9	29	49	4	1447	#CC0B00	150684368	FALSE	NIC2	TRUE	276	9159000	15037759	0.6090668164052901	0	7800462	0.5187250307708748	TRUE	0.727048	C	1e-5	1e-5	0.727048	0.272862	1e-5	1e-5	1e-5	1e-5	1e-5	1e-5	1e-5	FALSE
I	2867958	2886099	NIC2	CX11292	1	29	50	1	18141	#CC0000	2453905988	TRUE	NIC2	TRUE	276	9159000	15037759	0.6090668164052901	0	7800462	0.5187250307708748	TRUE	0.727048	C	1e-5	1e-5	0.727048	0.272862	1e-5	1e-5	1e-5	1e-5	1e-5	1e-5	1e-5	FALSE
I	2886099	2936666	EG4946	CX11292	1	29	51	19	50567	#CC4400	33166819	FALSE	NIC2	TRUE	276	9159000	15037759	0.6090668164052901	0	7800462	0.5187250307708748	TRUE	0.727048	C	1e-5	1e-5	0.727048	0.272862	1e-5	1e-5	1e-5	1e-5	1e-5	1e-5	1e-5	FALSE
I	2936666	3018467	NIC2	CX11292	1	29	52	1	81801	#CC0000	2453905988	TRUE	NIC2	TRUE	276	9159000	15037759	0.6090668164052901	0	7800462	0.5187250307708748	TRUE	0.727048	C	1e-5	1e-5	0.727048	0.272862	1e-5	1e-5	1e-5	1e-5	1e-5	1e-5	1e-5	FALSE
I	3018467	3046978	EG4946	CX11292	1	29	53	19	28511	#CC4400	33166819	FALSE	NIC2	TRUE	276	9159000	15037759	0.6090668164052901	0	7800462	0.5187250307708748	TRUE	0.727048	C	1e-5	1e-5	0.727048	0.272862	1e-5	1e-5	1e-5	1e-5	1e-5	1e-5	1e-5	FALSE
I	3046978	3047977	NIC2	CX11292	1	29	54	1	999	#CC0000	2453905988	TRUE	NIC2	TRUE	276	9159000	15037759	0.6090668164052901	0	7800462	0.5187250307708748	TRUE	0.727048	C	1e-5	1e-5	0.727048	0.272862	1e-5	1e-5	1e-5	1e-5	1e-5	1e-5	1e-5	FALSE
I	3047977	3064995	EG4946	CX11292	1	29	55	19	17018	#CC4400	33166819	FALSE	NIC2	TRUE	276	9159000	15037759	0.6090668164052901	0	7800462	0.5187250307708748	TRUE	0.727048	C	1e-5	1e-5	0.727048	0.272862	1e-5	1e-5	1e-5	1e-5	1e-5	1e-5	1e-5	FALSE
I	3064995	3104790	NIC2	CX11292	1	29	56	1	39795	#CC0000	2453905988	TRUE	NIC2	TRUE	276	9159000	15037759	0.6090668164052901	0	7800462	0.5187250307708748	TRUE	0.727048	C	1e-5	1e-5	0.727048	0.272862	1e-5	1e-5	1e-5	1e-5	1e-5	1e-5	1e-5	FALSE
I	3104790	3410583	EG4946	CX11292	1	29	57	19	305793	#CC4400	33166819	FALSE	NIC2	TRUE	276	9159000	15037759	0.6090668164052901	0	7800462	0.5187250307708748	TRUE	0.727048	C	1e-5	1e-5	0.727048	0.272862	1e-5	1e-5	1e-5	1e-5	1e-5	1e-5	1e-5	FALSE
I	3410583	3421647	NIC2	CX11292	1	29	58	1	11064	#CC0000	2453905988	TRUE	NIC2	TRUE	276	9159000	15037759	0.6090668164052901	0	7800462	0.5187250307708748	TRUE	0.727048	C	1e-5	1e-5	0.727048	0.272862	1e-5	1e-5	1e-5	1e-5	1e-5	1e-5	1e-5	FALSE
I	3421647	3559173	EG4946	CX11292	1	29	59	19	137526	#CC4400	33166819	FALSE	NIC2	TRUE	276	9159000	15037759	0.6090668164052901	0	7800462	0.5187250307708748	TRUE	0.727048	C	1e-5	1e-5	0.727048	0.272862	1e-5	1e-5	1e-5	1e-5	1e-5	1e-5	1e-5	FALSE
I	3559173	3585161	NIC2	CX11292	1	29	60	1	25988	#CC0000	2453905988	TRUE	NIC2	TRUE	276	9159000	15037759	0.6090668164052901	0	7800462	0.5187250307708748	TRUE	0.727048	C	1e-5	1e-5	0.727048	0.272862	1e-5	1e-5	1e-5	1e-5	1e-5	1e-5	1e-5	FALSE
I	3585161	4360210	EG4946	CX11292	1	29	61	19	775049	#CC4400	33166819	FALSE	NIC2	TRUE	276	9159000	15037759	0.6090668164052901	0	7800462	0.5187250307708748	TRUE	0.727048	C	1e-5	1e-5	0.727048	0.272862	1e-5	1e-5	1e-5	1e-5	1e-5	1e-5	1e-5	FALSE
I	4360210	9946989	NIC2	CX11292	1	29	62	1	5586779	#CC0000	2453905988	TRUE	NIC2	TRUE	276	9159000	15037759	0.6090668164052901	5586779	7800462	0.5187250307708748	TRUE	0.727048	C	1e-5	1e-5	0.727048	0.272862	1e-5	1e-5	1e-5	1e-5	1e-5	1e-5	1e-5	FALSE
I	9946989	10351020	EG4347	CX11292	1	29	63	5	404031	#FF1300	122541644	FALSE	NIC2	TRUE	276	9159000	15037759	0.6090668164052901	0	7800462	0.5187250307708748	TRUE	0.727048	C	1e-5	1e-5	0.727048	0.272862	1e-5	1e-5	1e-5	1e-5	1e-5	1e-5	1e-5	FALSE
I	10351020	10354853	NIC2	CX11292	1	29	64	1	3833	#CC0000	2453905988	TRUE	NIC2	TRUE	276	9159000	15037759	0.6090668164052901	0	7800462	0.5187250307708748	TRUE	0.727048	C	1e-5	1e-5	0.727048	0.272862	1e-5	1e-5	1e-5	1e-5	1e-5	1e-5	1e-5	FALSE
I	10354853	10634911	EG4347	CX11292	1	29	65	5	280058	#FF1300	122541644	FALSE	NIC2	TRUE	276	9159000	15037759	0.6090668164052901	0	7800462	0.5187250307708748	TRUE	0.727048	C	1e-5	1e-5	0.727048	0.272862	1e-5	1e-5	1e-5	1e-5	1e-5	1e-5	1e-5	FALSE
I	10634911	10639190	NIC2	CX11292	1	29	66	1	4279	#CC0000	2453905988	TRUE	NIC2	TRUE	276	9159000	15037759	0.6090668164052901	0	7800462	0.5187250307708748	TRUE	0.727048	C	1e-5	1e-5	0.727048	0.272862	1e-5	1e-5	1e-5	1e-5	1e-5	1e-5	1e-5	FALSE
I	10639190	10883065	EG4347	CX11292	1	29	67	5	243875	#FF1300	122541644	FALSE	NIC2	TRUE	276	9159000	15037759	0.6090668164052901	0	7800462	0.5187250307708748	TRUE	0.727048	C	1e-5	1e-5	0.727048	0.272862	1e-5	1e-5	1e-5	1e-5	1e-5	1e-5	1e-5	FALSE
I	10883065	10908578	NIC2	CX11292	1	29	68	1	25513	#CC0000	2453905988	TRUE	NIC2	TRUE	276	9159000	15037759	0.6090668164052901	0	7800462	0.5187250307708748	TRUE	0.727048	C	1e-5	1e-5	0.727048	0.272862	1e-5	1e-5	1e-5	1e-5	1e-5	1e-5	1e-5	FALSE
I	10908578	11396234	EG4347	CX11292	1	29	69	5	487656	#FF1300	122541644	FALSE	NIC2	TRUE	276	9159000	15037759	0.6090668164052901	0	7800462	0.5187250307708748	TRUE	0.727048	C	1e-5	1e-5	0.727048	0.272862	1e-5	1e-5	1e-5	1e-5	1e-5	1e-5	1e-5	FALSE
I	11396234	11460051	NIC2	CX11292	1	29	70	1	63817	#CC0000	2453905988	TRUE	NIC2	TRUE	276	9159000	15037759	0.6090668164052901	0	7800462	0.5187250307708748	TRUE	0.727048	C	1e-5	1e-5	0.727048	0.272862	1e-5	1e-5	1e-5	1e-5	1e-5	1e-5	1e-5	FALSE
I	11460051	11503320	EG4347	CX11292	1	29	71	5	43269	#FF1300	122541644	FALSE	NIC2	TRUE	276	9159000	15037759	0.6090668164052901	0	7800462	0.5187250307708748	TRUE	0.727048	C	1e-5	1e-5	0.727048	0.272862	1e-5	1e-5	1e-5	1e-5	1e-5	1e-5	1e-5	FALSE
I	11503320	11551724	NIC2	CX11292	1	29	72	1	48404	#CC0000	2453905988	TRUE	NIC2	TRUE	276	9159000	15037759	0.6090668164052901	0	7800462	0.5187250307708748	TRUE	0.727048	C	1e-5	1e-5	0.727048	0.272862	1e-5	1e-5	1e-5	1e-5	1e-5	1e-5	1e-5	FALSE
I	11551724	12236997	EG4347	CX11292	1	29	73	5	685273	#FF1300	122541644	FALSE	NIC2	TRUE	276	9159000	15037759	0.6090668164052901	0	7800462	0.5187250307708748	TRUE	0.727048	C	1e-5	1e-5	0.727048	0.272862	1e-5	1e-5	1e-5	1e-5	1e-5	1e-5	1e-5	FALSE
I	12236997	12435701	NIC2	CX11292	1	29	74	1	198704	#CC0000	2453905988	TRUE	NIC2	TRUE	276	9159000	15037759	0.6090668164052901	0	7800462	0.5187250307708748	TRUE	0.727048	C	1e-5	1e-5	0.727048	0.272862	1e-5	1e-5	1e-5	1e-5	1e-5	1e-5	1e-5	FALSE
I	12435701	12618732	EG4347	CX11292	1	29	75	5	183031	#FF1300	122541644	FALSE	NIC2	TRUE	276	9159000	15037759	0.6090668164052901	0	7800462	0.5187250307708748	TRUE	0.727048	C	1e-5	1e-5	0.727048	0.272862	1e-5	1e-5	1e-5	1e-5	1e-5	1e-5	1e-5	FALSE
I	12618732	14832415	NIC2	CX11292	1	29	76	1	2213683	#CC0000	2453905988	TRUE	NIC2	TRUE	276	9159000	15037759	0.6090668164052901	2213683	7800462	0.5187250307708748	TRUE	0.727048	C	1e-5	1e-5	0.727048	0.272862	1e-5	1e-5	1e-5	1e-5	1e-5	1e-5	1e-5	FALSE
I	14832415	15041422	CX11271	CX11292	1	29	77	23	209007	#FF6800	5445413	FALSE	NIC2	TRUE	276	9159000	15037759	0.6090668164052901	0	7800462	0.5187250307708748	TRUE	0.727048	C	1e-5	1e-5	0.727048	0.272862	1e-5	1e-5	1e-5	1e-5	1e-5	1e-5	1e-5	FALSE
I	3663	448892	QG536	CX11307	1	208	1	7	445229	#CC1700	59985814	FALSE	NIC2	TRUE	276	6136412	15037759	0.40806692007765255	0	3679491	0.24468346646598074	TRUE	0.59957	C	1e-5	1e-5	0.59957	0.183651	1e-5	1e-5	0.038083	1e-5	0.070271	0.057709	0.050666	FALSE
I	448892	528414	ED3048	CX11307	0.9	208	2	4	79522	#CC0B00	150684368	FALSE	NIC2	TRUE	276	6136412	15037759	0.40806692007765255	0	3679491	0.24468346646598074	TRUE	0.59957	C	1e-5	1e-5	0.59957	0.183651	1e-5	1e-5	0.038083	1e-5	0.070271	0.057709	0.050666	FALSE
I	528414	835064	QG536	CX11307	1	208	3	7	306650	#CC1700	59985814	FALSE	NIC2	TRUE	276	6136412	15037759	0.40806692007765255	0	3679491	0.24468346646598074	TRUE	0.59957	C	1e-5	1e-5	0.59957	0.183651	1e-5	1e-5	0.038083	1e-5	0.070271	0.057709	0.050666	FALSE
I	835064	843028	ED3048	CX11307	0.9	208	4	4	7964	#CC0B00	150684368	FALSE	NIC2	TRUE	276	6136412	15037759	0.40806692007765255	0	3679491	0.24468346646598074	TRUE	0.59957	C	1e-5	1e-5	0.59957	0.183651	1e-5	1e-5	0.038083	1e-5	0.070271	0.057709	0.050666	FALSE
I	843028	844068	QG536	CX11307	1	208	5	7	1040	#CC1700	59985814	FALSE	NIC2	TRUE	276	6136412	15037759	0.40806692007765255	0	3679491	0.24468346646598074	TRUE	0.59957	C	1e-5	1e-5	0.59957	0.183651	1e-5	1e-5	0.038083	1e-5	0.070271	0.057709	0.050666	FALSE
I	844068	864435	NIC2	CX11307	1	208	6	1	20367	#CC0000	2453905988	TRUE	NIC2	TRUE	276	6136412	15037759	0.40806692007765255	0	3679491	0.24468346646598074	TRUE	0.59957	C	1e-5	1e-5	0.59957	0.183651	1e-5	1e-5	0.038083	1e-5	0.070271	0.057709	0.050666	FALSE
I	864435	1017980	QG536	CX11307	1	208	7	7	153545	#CC1700	59985814	FALSE	NIC2	TRUE	276	6136412	15037759	0.40806692007765255	0	3679491	0.24468346646598074	TRUE	0.59957	C	1e-5	1e-5	0.59957	0.183651	1e-5	1e-5	0.038083	1e-5	0.070271	0.057709	0.050666	FALSE
I	1017980	1049837	NIC2	CX11307	1	208	8	1	31857	#CC0000	2453905988	TRUE	NIC2	TRUE	276	6136412	15037759	0.40806692007765255	0	3679491	0.24468346646598074	TRUE	0.59957	C	1e-5	1e-5	0.59957	0.183651	1e-5	1e-5	0.038083	1e-5	0.070271	0.057709	0.050666	FALSE
I	1049837	1091061	QG536	CX11307	1	208	9	7	41224	#CC1700	59985814	FALSE	NIC2	TRUE	276	6136412	15037759	0.40806692007765255	0	3679491	0.24468346646598074	TRUE	0.59957	C	1e-5	1e-5	0.59957	0.183651	1e-5	1e-5	0.038083	1e-5	0.070271	0.057709	0.050666	FALSE
I	1091061	1136414	NIC2	CX11307	1	208	10	1	45353	#CC0000	2453905988	TRUE	NIC2	TRUE	276	6136412	15037759	0.40806692007765255	0	3679491	0.24468346646598074	TRUE	0.59957	C	1e-5	1e-5	0.59957	0.183651	1e-5	1e-5	0.038083	1e-5	0.070271	0.057709	0.050666	FALSE
I	1136414	1150297	QG536	CX11307	1	208	11	7	13883	#CC1700	59985814	FALSE	NIC2	TRUE	276	6136412	15037759	0.40806692007765255	0	3679491	0.24468346646598074	TRUE	0.59957	C	1e-5	1e-5	0.59957	0.183651	1e-5	1e-5	0.038083	1e-5	0.070271	0.057709	0.050666	FALSE
I	1150297	1175482	ED3048	CX11307	0.9	208	12	4	25185	#CC0B00	150684368	FALSE	NIC2	TRUE	276	6136412	15037759	0.40806692007765255	0	3679491	0.24468346646598074	TRUE	0.59957	C	1e-5	1e-5	0.59957	0.183651	1e-5	1e-5	0.038083	1e-5	0.070271	0.057709	0.050666	FALSE
I	1175482	1182670	QG536	CX11307	1	208	13	7	7188	#CC1700	59985814	FALSE	NIC2	TRUE	276	6136412	15037759	0.40806692007765255	0	3679491	0.24468346646598074	TRUE	0.59957	C	1e-5	1e-5	0.59957	0.183651	1e-5	1e-5	0.038083	1e-5	0.070271	0.057709	0.050666	FALSE
I	1182670	1190482	ED3048	CX11307	0.9	208	14	4	7812	#CC0B00	150684368	FALSE	NIC2	TRUE	276	6136412	15037759	0.40806692007765255	0	3679491	0.24468346646598074	TRUE	0.59957	C	1e-5	1e-5	0.59957	0.183651	1e-5	1e-5	0.038083	1e-5	0.070271	0.057709	0.050666	FALSE
I	1190482	1242553	NIC2	CX11307	1	208	15	1	52071	#CC0000	2453905988	TRUE	NIC2	TRUE	276	6136412	15037759	0.40806692007765255	0	3679491	0.24468346646598074	TRUE	0.59957	C	1e-5	1e-5	0.59957	0.183651	1e-5	1e-5	0.038083	1e-5	0.070271	0.057709	0.050666	FALSE
I	1242553	1344494	ED3048	CX11307	0.9	208	16	4	101941	#CC0B00	150684368	FALSE	NIC2	TRUE	276	6136412	15037759	0.40806692007765255	0	3679491	0.24468346646598074	TRUE	0.59957	C	1e-5	1e-5	0.59957	0.183651	1e-5	1e-5	0.038083	1e-5	0.070271	0.057709	0.050666	FALSE
I	1344494	1420764	NIC2	CX11307	1	208	17	1	76270	#CC0000	2453905988	TRUE	NIC2	TRUE	276	6136412	15037759	0.40806692007765255	0	3679491	0.24468346646598074	TRUE	0.59957	C	1e-5	1e-5	0.59957	0.183651	1e-5	1e-5	0.038083	1e-5	0.070271	0.057709	0.050666	FALSE
I	1420764	1443616	ED3048	CX11307	0.9	208	18	4	22852	#CC0B00	150684368	FALSE	NIC2	TRUE	276	6136412	15037759	0.40806692007765255	0	3679491	0.24468346646598074	TRUE	0.59957	C	1e-5	1e-5	0.59957	0.183651	1e-5	1e-5	0.038083	1e-5	0.070271	0.057709	0.050666	FALSE
I	1443616	1454609	QG536	CX11307	1	208	19	7	10993	#CC1700	59985814	FALSE	NIC2	TRUE	276	6136412	15037759	0.40806692007765255	0	3679491	0.24468346646598074	TRUE	0.59957	C	1e-5	1e-5	0.59957	0.183651	1e-5	1e-5	0.038083	1e-5	0.070271	0.057709	0.050666	FALSE
I	1454609	1463349	NIC2	CX11307	1	208	20	1	8740	#CC0000	2453905988	TRUE	NIC2	TRUE	276	6136412	15037759	0.40806692007765255	0	3679491	0.24468346646598074	TRUE	0.59957	C	1e-5	1e-5	0.59957	0.183651	1e-5	1e-5	0.038083	1e-5	0.070271	0.057709	0.050666	FALSE
I	1463349	1486678	QG536	CX11307	1	208	21	7	23329	#CC1700	59985814	FALSE	NIC2	TRUE	276	6136412	15037759	0.40806692007765255	0	3679491	0.24468346646598074	TRUE	0.59957	C	1e-5	1e-5	0.59957	0.183651	1e-5	1e-5	0.038083	1e-5	0.070271	0.057709	0.050666	FALSE
I	1486678	1610423	NIC2	CX11307	1	208	22	1	123745	#CC0000	2453905988	TRUE	NIC2	TRUE	276	6136412	15037759	0.40806692007765255	0	3679491	0.24468346646598074	TRUE	0.59957	C	1e-5	1e-5	0.59957	0.183651	1e-5	1e-5	0.038083	1e-5	0.070271	0.057709	0.050666	FALSE
I	1610423	1640212	ED3048	CX11307	0.9	208	23	4	29789	#CC0B00	150684368	FALSE	NIC2	TRUE	276	6136412	15037759	0.40806692007765255	0	3679491	0.24468346646598074	TRUE	0.59957	C	1e-5	1e-5	0.59957	0.183651	1e-5	1e-5	0.038083	1e-5	0.070271	0.057709	0.050666	FALSE
I	1640212	1660874	NIC2	CX11307	1	208	24	1	20662	#CC0000	2453905988	TRUE	NIC2	TRUE	276	6136412	15037759	0.40806692007765255	0	3679491	0.24468346646598074	TRUE	0.59957	C	1e-5	1e-5	0.59957	0.183651	1e-5	1e-5	0.038083	1e-5	0.070271	0.057709	0.050666	FALSE
I	1660874	1750821	ED3048	CX11307	0.9	208	25	4	89947	#CC0B00	150684368	FALSE	NIC2	TRUE	276	6136412	15037759	0.40806692007765255	0	3679491	0.24468346646598074	TRUE	0.59957	C	1e-5	1e-5	0.59957	0.183651	1e-5	1e-5	0.038083	1e-5	0.070271	0.057709	0.050666	FALSE
I	1750821	1781567	NIC2	CX11307	1	208	26	1	30746	#CC0000	2453905988	TRUE	NIC2	TRUE	276	6136412	15037759	0.40806692007765255	0	3679491	0.24468346646598074	TRUE	0.59957	C	1e-5	1e-5	0.59957	0.183651	1e-5	1e-5	0.038083	1e-5	0.070271	0.057709	0.050666	FALSE
I	1781567	1825779	ED3048	CX11307	0.9	208	27	4	44212	#CC0B00	150684368	FALSE	NIC2	TRUE	276	6136412	15037759	0.40806692007765255	0	3679491	0.24468346646598074	TRUE	0.59957	C	1e-5	1e-5	0.59957	0.183651	1e-5	1e-5	0.038083	1e-5	0.070271	0.057709	0.050666	FALSE
I	1825779	1829697	NIC2	CX11307	1	208	28	1	3918	#CC0000	2453905988	TRUE	NIC2	TRUE	276	6136412	15037759	0.40806692007765255	0	3679491	0.24468346646598074	TRUE	0.59957	C	1e-5	1e-5	0.59957	0.183651	1e-5	1e-5	0.038083	1e-5	0.070271	0.057709	0.050666	FALSE
I	1829697	1851727	ED3048	CX11307	0.9	208	29	4	22030	#CC0B00	150684368	FALSE	NIC2	TRUE	276	6136412	15037759	0.40806692007765255	0	3679491	0.24468346646598074	TRUE	0.59957	C	1e-5	1e-5	0.59957	0.183651	1e-5	1e-5	0.038083	1e-5	0.070271	0.057709	0.050666	FALSE
I	1851727	1874368	NIC2	CX11307	1	208	30	1	22641	#CC0000	2453905988	TRUE	NIC2	TRUE	276	6136412	15037759	0.40806692007765255	0	3679491	0.24468346646598074	TRUE	0.59957	C	1e-5	1e-5	0.59957	0.183651	1e-5	1e-5	0.038083	1e-5	0.070271	0.057709	0.050666	FALSE
I	1874368	1881920	ED3048	CX11307	0.9	208	31	4	7552	#CC0B00	150684368	FALSE	NIC2	TRUE	276	6136412	15037759	0.40806692007765255	0	3679491	0.24468346646598074	TRUE	0.59957	C	1e-5	1e-5	0.59957	0.183651	1e-5	1e-5	0.038083	1e-5	0.070271	0.057709	0.050666	FALSE
I	1881920	1913957	NIC2	CX11307	1	208	32	1	32037	#CC0000	2453905988	TRUE	NIC2	TRUE	276	6136412	15037759	0.40806692007765255	0	3679491	0.24468346646598074	TRUE	0.59957	C	1e-5	1e-5	0.59957	0.183651	1e-5	1e-5	0.038083	1e-5	0.070271	0.057709	0.050666	FALSE
I	1913957	1922747	ED3048	CX11307	0.9	208	33	4	8790	#CC0B00	150684368	FALSE	NIC2	TRUE	276	6136412	15037759	0.40806692007765255	0	3679491	0.24468346646598074	TRUE	0.59957	C	1e-5	1e-5	0.59957	0.183651	1e-5	1e-5	0.038083	1e-5	0.070271	0.057709	0.050666	FALSE
I	1922747	1974234	NIC2	CX11307	1	208	34	1	51487	#CC0000	2453905988	TRUE	NIC2	TRUE	276	6136412	15037759	0.40806692007765255	0	3679491	0.24468346646598074	TRUE	0.59957	C	1e-5	1e-5	0.59957	0.183651	1e-5	1e-5	0.038083	1e-5	0.070271	0.057709	0.050666	FALSE
I	1974234	1981352	ED3048	CX11307	0.9	208	35	4	7118	#CC0B00	150684368	FALSE	NIC2	TRUE	276	6136412	15037759	0.40806692007765255	0	3679491	0.24468346646598074	TRUE	0.59957	C	1e-5	1e-5	0.59957	0.183651	1e-5	1e-5	0.038083	1e-5	0.070271	0.057709	0.050666	FALSE
I	1981352	2040543	NIC2	CX11307	1	208	36	1	59191	#CC0000	2453905988	TRUE	NIC2	TRUE	276	6136412	15037759	0.40806692007765255	0	3679491	0.24468346646598074	TRUE	0.59957	C	1e-5	1e-5	0.59957	0.183651	1e-5	1e-5	0.038083	1e-5	0.070271	0.057709	0.050666	FALSE
I	2040543	2161780	ED3048	CX11307	0.9	208	37	4	121237	#CC0B00	150684368	FALSE	NIC2	TRUE	276	6136412	15037759	0.40806692007765255	0	3679491	0.24468346646598074	TRUE	0.59957	C	1e-5	1e-5	0.59957	0.183651	1e-5	1e-5	0.038083	1e-5	0.070271	0.057709	0.050666	FALSE
I	2161780	2176348	NIC2	CX11307	1	208	38	1	14568	#CC0000	2453905988	TRUE	NIC2	TRUE	276	6136412	15037759	0.40806692007765255	0	3679491	0.24468346646598074	TRUE	0.59957	C	1e-5	1e-5	0.59957	0.183651	1e-5	1e-5	0.038083	1e-5	0.070271	0.057709	0.050666	FALSE
I	2176348	2190339	ED3048	CX11307	0.9	208	39	4	13991	#CC0B00	150684368	FALSE	NIC2	TRUE	276	6136412	15037759	0.40806692007765255	0	3679491	0.24468346646598074	TRUE	0.59957	C	1e-5	1e-5	0.59957	0.183651	1e-5	1e-5	0.038083	1e-5	0.070271	0.057709	0.050666	FALSE
I	2190339	2204010	NIC2	CX11307	1	208	40	1	13671	#CC0000	2453905988	TRUE	NIC2	TRUE	276	6136412	15037759	0.40806692007765255	0	3679491	0.24468346646598074	TRUE	0.59957	C	1e-5	1e-5	0.59957	0.183651	1e-5	1e-5	0.038083	1e-5	0.070271	0.057709	0.050666	FALSE
I	2204010	2465076	ED3048	CX11307	0.9	208	41	4	261066	#CC0B00	150684368	FALSE	NIC2	TRUE	276	6136412	15037759	0.40806692007765255	0	3679491	0.24468346646598074	TRUE	0.59957	C	1e-5	1e-5	0.59957	0.183651	1e-5	1e-5	0.038083	1e-5	0.070271	0.057709	0.050666	FALSE
I	2465076	2468912	NIC2	CX11307	1	208	42	1	3836	#CC0000	2453905988	TRUE	NIC2	TRUE	276	6136412	15037759	0.40806692007765255	0	3679491	0.24468346646598074	TRUE	0.59957	C	1e-5	1e-5	0.59957	0.183651	1e-5	1e-5	0.038083	1e-5	0.070271	0.057709	0.050666	FALSE
I	2468912	2500102	ED3048	CX11307	0.9	208	43	4	31190	#CC0B00	150684368	FALSE	NIC2	TRUE	276	6136412	15037759	0.40806692007765255	0	3679491	0.24468346646598074	TRUE	0.59957	C	1e-5	1e-5	0.59957	0.183651	1e-5	1e-5	0.038083	1e-5	0.070271	0.057709	0.050666	FALSE
I	2500102	2513751	NIC2	CX11307	1	208	44	1	13649	#CC0000	2453905988	TRUE	NIC2	TRUE	276	6136412	15037759	0.40806692007765255	0	3679491	0.24468346646598074	TRUE	0.59957	C	1e-5	1e-5	0.59957	0.183651	1e-5	1e-5	0.038083	1e-5	0.070271	0.057709	0.050666	FALSE
I	2513751	2576070	ED3048	CX11307	0.9	208	45	4	62319	#CC0B00	150684368	FALSE	NIC2	TRUE	276	6136412	15037759	0.40806692007765255	0	3679491	0.24468346646598074	TRUE	0.59957	C	1e-5	1e-5	0.59957	0.183651	1e-5	1e-5	0.038083	1e-5	0.070271	0.057709	0.050666	FALSE
I	2576070	2785019	NIC2	CX11307	1	208	46	1	208949	#CC0000	2453905988	TRUE	NIC2	TRUE	276	6136412	15037759	0.40806692007765255	0	3679491	0.24468346646598074	TRUE	0.59957	C	1e-5	1e-5	0.59957	0.183651	1e-5	1e-5	0.038083	1e-5	0.070271	0.057709	0.050666	FALSE
I	2785019	2864069	ED3048	CX11307	0.9	208	47	4	79050	#CC0B00	150684368	FALSE	NIC2	TRUE	276	6136412	15037759	0.40806692007765255	0	3679491	0.24468346646598074	TRUE	0.59957	C	1e-5	1e-5	0.59957	0.183651	1e-5	1e-5	0.038083	1e-5	0.070271	0.057709	0.050666	FALSE
I	2864069	2866511	NIC2	CX11307	1	208	48	1	2442	#CC0000	2453905988	TRUE	NIC2	TRUE	276	6136412	15037759	0.40806692007765255	0	3679491	0.24468346646598074	TRUE	0.59957	C	1e-5	1e-5	0.59957	0.183651	1e-5	1e-5	0.038083	1e-5	0.070271	0.057709	0.050666	FALSE
I	2866511	2867958	ED3048	CX11307	0.9	208	49	4	1447	#CC0B00	150684368	FALSE	NIC2	TRUE	276	6136412	15037759	0.40806692007765255	0	3679491	0.24468346646598074	TRUE	0.59957	C	1e-5	1e-5	0.59957	0.183651	1e-5	1e-5	0.038083	1e-5	0.070271	0.057709	0.050666	FALSE
I	2867958	2886099	NIC2	CX11307	1	208	50	1	18141	#CC0000	2453905988	TRUE	NIC2	TRUE	276	6136412	15037759	0.40806692007765255	0	3679491	0.24468346646598074	TRUE	0.59957	C	1e-5	1e-5	0.59957	0.183651	1e-5	1e-5	0.038083	1e-5	0.070271	0.057709	0.050666	FALSE
I	2886099	2936666	EG4946	CX11307	1	208	51	19	50567	#CC4400	33166819	FALSE	NIC2	TRUE	276	6136412	15037759	0.40806692007765255	0	3679491	0.24468346646598074	TRUE	0.59957	C	1e-5	1e-5	0.59957	0.183651	1e-5	1e-5	0.038083	1e-5	0.070271	0.057709	0.050666	FALSE
I	2936666	3018467	NIC2	CX11307	1	208	52	1	81801	#CC0000	2453905988	TRUE	NIC2	TRUE	276	6136412	15037759	0.40806692007765255	0	3679491	0.24468346646598074	TRUE	0.59957	C	1e-5	1e-5	0.59957	0.183651	1e-5	1e-5	0.038083	1e-5	0.070271	0.057709	0.050666	FALSE
I	3018467	3046978	EG4946	CX11307	1	208	53	19	28511	#CC4400	33166819	FALSE	NIC2	TRUE	276	6136412	15037759	0.40806692007765255	0	3679491	0.24468346646598074	TRUE	0.59957	C	1e-5	1e-5	0.59957	0.183651	1e-5	1e-5	0.038083	1e-5	0.070271	0.057709	0.050666	FALSE
I	3046978	3047977	NIC2	CX11307	1	208	54	1	999	#CC0000	2453905988	TRUE	NIC2	TRUE	276	6136412	15037759	0.40806692007765255	0	3679491	0.24468346646598074	TRUE	0.59957	C	1e-5	1e-5	0.59957	0.183651	1e-5	1e-5	0.038083	1e-5	0.070271	0.057709	0.050666	FALSE
I	3047977	3064995	EG4946	CX11307	1	208	55	19	17018	#CC4400	33166819	FALSE	NIC2	TRUE	276	6136412	15037759	0.40806692007765255	0	3679491	0.24468346646598074	TRUE	0.59957	C	1e-5	1e-5	0.59957	0.183651	1e-5	1e-5	0.038083	1e-5	0.070271	0.057709	0.050666	FALSE
I	3064995	3104790	NIC2	CX11307	1	208	56	1	39795	#CC0000	2453905988	TRUE	NIC2	TRUE	276	6136412	15037759	0.40806692007765255	0	3679491	0.24468346646598074	TRUE	0.59957	C	1e-5	1e-5	0.59957	0.183651	1e-5	1e-5	0.038083	1e-5	0.070271	0.057709	0.050666	FALSE
I	3104790	3410583	EG4946	CX11307	1	208	57	19	305793	#CC4400	33166819	FALSE	NIC2	TRUE	276	6136412	15037759	0.40806692007765255	0	3679491	0.24468346646598074	TRUE	0.59957	C	1e-5	1e-5	0.59957	0.183651	1e-5	1e-5	0.038083	1e-5	0.070271	0.057709	0.050666	FALSE
I	3410583	3421647	NIC2	CX11307	1	208	58	1	11064	#CC0000	2453905988	TRUE	NIC2	TRUE	276	6136412	15037759	0.40806692007765255	0	3679491	0.24468346646598074	TRUE	0.59957	C	1e-5	1e-5	0.59957	0.183651	1e-5	1e-5	0.038083	1e-5	0.070271	0.057709	0.050666	FALSE
I	3421647	3559173	EG4946	CX11307	1	208	59	19	137526	#CC4400	33166819	FALSE	NIC2	TRUE	276	6136412	15037759	0.40806692007765255	0	3679491	0.24468346646598074	TRUE	0.59957	C	1e-5	1e-5	0.59957	0.183651	1e-5	1e-5	0.038083	1e-5	0.070271	0.057709	0.050666	FALSE
I	3559173	3585161	NIC2	CX11307	1	208	60	1	25988	#CC0000	2453905988	TRUE	NIC2	TRUE	276	6136412	15037759	0.40806692007765255	0	3679491	0.24468346646598074	TRUE	0.59957	C	1e-5	1e-5	0.59957	0.183651	1e-5	1e-5	0.038083	1e-5	0.070271	0.057709	0.050666	FALSE
I	3585161	4360210	EG4946	CX11307	1	208	61	19	775049	#CC4400	33166819	FALSE	NIC2	TRUE	276	6136412	15037759	0.40806692007765255	0	3679491	0.24468346646598074	TRUE	0.59957	C	1e-5	1e-5	0.59957	0.183651	1e-5	1e-5	0.038083	1e-5	0.070271	0.057709	0.050666	FALSE
I	4360210	8039701	NIC2	CX11307	1	208	62	1	3679491	#CC0000	2453905988	TRUE	NIC2	TRUE	276	6136412	15037759	0.40806692007765255	3679491	3679491	0.24468346646598074	TRUE	0.59957	C	1e-5	1e-5	0.59957	0.183651	1e-5	1e-5	0.038083	1e-5	0.070271	0.057709	0.050666	FALSE
I	8039701	9871756	RC301	CX11307	1	208	63	111	1832055	#66FF6B	11345541	FALSE	NIC2	TRUE	276	6136412	15037759	0.40806692007765255	0	3679491	0.24468346646598074	TRUE	0.59957	C	1e-5	1e-5	0.59957	0.183651	1e-5	1e-5	0.038083	1e-5	0.070271	0.057709	0.050666	FALSE
I	9871756	9965702	NIC2	CX11307	1	208	64	1	93946	#CC0000	2453905988	TRUE	NIC2	TRUE	276	6136412	15037759	0.40806692007765255	0	3679491	0.24468346646598074	TRUE	0.59957	C	1e-5	1e-5	0.59957	0.183651	1e-5	1e-5	0.038083	1e-5	0.070271	0.057709	0.050666	FALSE
I	9965702	10143880	KR314	CX11307	1	208	65	81	178178	#B6FF66	29187083	FALSE	NIC2	TRUE	276	6136412	15037759	0.40806692007765255	0	3679491	0.24468346646598074	TRUE	0.59957	C	1e-5	1e-5	0.59957	0.183651	1e-5	1e-5	0.038083	1e-5	0.070271	0.057709	0.050666	FALSE
I	10143880	10179056	NIC2	CX11307	1	208	66	1	35176	#CC0000	2453905988	TRUE	NIC2	TRUE	276	6136412	15037759	0.40806692007765255	0	3679491	0.24468346646598074	TRUE	0.59957	C	1e-5	1e-5	0.59957	0.183651	1e-5	1e-5	0.038083	1e-5	0.070271	0.057709	0.050666	FALSE
I	10179056	10678259	KR314	CX11307	1	208	67	81	499203	#B6FF66	29187083	FALSE	NIC2	TRUE	276	6136412	15037759	0.40806692007765255	0	3679491	0.24468346646598074	TRUE	0.59957	C	1e-5	1e-5	0.59957	0.183651	1e-5	1e-5	0.038083	1e-5	0.070271	0.057709	0.050666	FALSE
I	10678259	10730876	NIC2	CX11307	1	208	68	1	52617	#CC0000	2453905988	TRUE	NIC2	TRUE	276	6136412	15037759	0.40806692007765255	0	3679491	0.24468346646598074	TRUE	0.59957	C	1e-5	1e-5	0.59957	0.183651	1e-5	1e-5	0.038083	1e-5	0.070271	0.057709	0.050666	FALSE
I	10730876	11214598	KR314	CX11307	1	208	69	81	483722	#B6FF66	29187083	FALSE	NIC2	TRUE	276	6136412	15037759	0.40806692007765255	0	3679491	0.24468346646598074	TRUE	0.59957	C	1e-5	1e-5	0.59957	0.183651	1e-5	1e-5	0.038083	1e-5	0.070271	0.057709	0.050666	FALSE
I	11214598	11233239	MY2535	CX11307	0.9	208	70	10	18641	#CC2200	212766310	FALSE	NIC2	TRUE	276	6136412	15037759	0.40806692007765255	0	3679491	0.24468346646598074	TRUE	0.59957	C	1e-5	1e-5	0.59957	0.183651	1e-5	1e-5	0.038083	1e-5	0.070271	0.057709	0.050666	FALSE
I	11233239	11250365	KR314	CX11307	1	208	71	81	17126	#B6FF66	29187083	FALSE	NIC2	TRUE	276	6136412	15037759	0.40806692007765255	0	3679491	0.24468346646598074	TRUE	0.59957	C	1e-5	1e-5	0.59957	0.183651	1e-5	1e-5	0.038083	1e-5	0.070271	0.057709	0.050666	FALSE
I	11250365	11392028	RC301	CX11307	1	208	72	111	141663	#66FF6B	11345541	FALSE	NIC2	TRUE	276	6136412	15037759	0.40806692007765255	0	3679491	0.24468346646598074	TRUE	0.59957	C	1e-5	1e-5	0.59957	0.183651	1e-5	1e-5	0.038083	1e-5	0.070271	0.057709	0.050666	FALSE
I	11392028	11396234	EG4347	CX11307	1	208	73	5	4206	#FF1300	122541644	FALSE	NIC2	TRUE	276	6136412	15037759	0.40806692007765255	0	3679491	0.24468346646598074	TRUE	0.59957	C	1e-5	1e-5	0.59957	0.183651	1e-5	1e-5	0.038083	1e-5	0.070271	0.057709	0.050666	FALSE
I	11396234	11428144	NIC2	CX11307	1	208	74	1	31910	#CC0000	2453905988	TRUE	NIC2	TRUE	276	6136412	15037759	0.40806692007765255	0	3679491	0.24468346646598074	TRUE	0.59957	C	1e-5	1e-5	0.59957	0.183651	1e-5	1e-5	0.038083	1e-5	0.070271	0.057709	0.050666	FALSE
I	11428144	11609469	RC301	CX11307	1	208	75	111	181325	#66FF6B	11345541	FALSE	NIC2	TRUE	276	6136412	15037759	0.40806692007765255	0	3679491	0.24468346646598074	TRUE	0.59957	C	1e-5	1e-5	0.59957	0.183651	1e-5	1e-5	0.038083	1e-5	0.070271	0.057709	0.050666	FALSE
I	11609469	11646851	NIC2	CX11307	1	208	76	1	37382	#CC0000	2453905988	TRUE	NIC2	TRUE	276	6136412	15037759	0.40806692007765255	0	3679491	0.24468346646598074	TRUE	0.59957	C	1e-5	1e-5	0.59957	0.183651	1e-5	1e-5	0.038083	1e-5	0.070271	0.057709	0.050666	FALSE
I	11979068	11988537	MY10	CX11307	0.9	208	78	138	9469	#66FFB7	1535671	FALSE	NIC2	TRUE	276	6136412	15037759	0.40806692007765255	0	3679491	0.24468346646598074	TRUE	0.59957	C	1e-5	1e-5	0.59957	0.183651	1e-5	1e-5	0.038083	1e-5	0.070271	0.057709	0.050666	FALSE
I	11988537	11997945	JU2619	CX11307	1	208	79	135	9408	#66FFAF	5782227	FALSE	NIC2	TRUE	276	6136412	15037759	0.40806692007765255	0	3679491	0.24468346646598074	TRUE	0.59957	C	1e-5	1e-5	0.59957	0.183651	1e-5	1e-5	0.038083	1e-5	0.070271	0.057709	0.050666	FALSE
I	11997945	12014686	CX11307	CX11307	0.9	208	80	208	16741	#0024CC	33482	FALSE	NIC2	TRUE	276	6136412	15037759	0.40806692007765255	0	3679491	0.24468346646598074	TRUE	0.59957	C	1e-5	1e-5	0.59957	0.183651	1e-5	1e-5	0.038083	1e-5	0.070271	0.057709	0.050666	FALSE
I	12014686	12166608	JU2878	CX11307	0.9	208	81	82	151922	#67CC00	5006389	FALSE	NIC2	TRUE	276	6136412	15037759	0.40806692007765255	0	3679491	0.24468346646598074	TRUE	0.59957	C	1e-5	1e-5	0.59957	0.183651	1e-5	1e-5	0.038083	1e-5	0.070271	0.057709	0.050666	FALSE
I	12166608	12348845	DL226	CX11307	1	208	82	165	182237	#66FAFF	97233978	FALSE	NIC2	TRUE	276	6136412	15037759	0.40806692007765255	0	3679491	0.24468346646598074	TRUE	0.59957	C	1e-5	1e-5	0.59957	0.183651	1e-5	1e-5	0.038083	1e-5	0.070271	0.057709	0.050666	FALSE
I	12348845	12523704	JU2878	CX11307	0.9	208	83	82	174859	#67CC00	5006389	FALSE	NIC2	TRUE	276	6136412	15037759	0.40806692007765255	0	3679491	0.24468346646598074	TRUE	0.59957	C	1e-5	1e-5	0.59957	0.183651	1e-5	1e-5	0.038083	1e-5	0.070271	0.057709	0.050666	FALSE
I	12523704	12748338	DL226	CX11307	1	208	84	165	224634	#66FAFF	97233978	FALSE	NIC2	TRUE	276	6136412	15037759	0.40806692007765255	0	3679491	0.24468346646598074	TRUE	0.59957	C	1e-5	1e-5	0.59957	0.183651	1e-5	1e-5	0.038083	1e-5	0.070271	0.057709	0.050666	FALSE
I	12748338	12759929	JU2838	CX11307	1	208	85	201	11591	#6695FF	3165822	FALSE	NIC2	TRUE	276	6136412	15037759	0.40806692007765255	0	3679491	0.24468346646598074	TRUE	0.59957	C	1e-5	1e-5	0.59957	0.183651	1e-5	1e-5	0.038083	1e-5	0.070271	0.057709	0.050666	FALSE
I	12759929	12764679	NIC513	CX11307	1	208	86	43	4750	#CC9E00	4340233	FALSE	NIC2	TRUE	276	6136412	15037759	0.40806692007765255	0	3679491	0.24468346646598074	TRUE	0.59957	C	1e-5	1e-5	0.59957	0.183651	1e-5	1e-5	0.038083	1e-5	0.070271	0.057709	0.050666	FALSE
I	12764679	12764958	ED3046	CX11307	1	208	87	69	279	#D8FF66	14658623	FALSE	NIC2	TRUE	276	6136412	15037759	0.40806692007765255	0	3679491	0.24468346646598074	TRUE	0.59957	C	1e-5	1e-5	0.59957	0.183651	1e-5	1e-5	0.038083	1e-5	0.070271	0.057709	0.050666	FALSE
I	12825869	12956871	NIC2	CX11307	1	208	89	1	131002	#CC0000	2453905988	TRUE	NIC2	TRUE	276	6136412	15037759	0.40806692007765255	0	3679491	0.24468346646598074	TRUE	0.59957	C	1e-5	1e-5	0.59957	0.183651	1e-5	1e-5	0.038083	1e-5	0.070271	0.057709	0.050666	FALSE
I	13009141	13490689	NIC2	CX11307	1	208	91	1	481548	#CC0000	2453905988	TRUE	NIC2	TRUE	276	6136412	15037759	0.40806692007765255	0	3679491	0.24468346646598074	TRUE	0.59957	C	1e-5	1e-5	0.59957	0.183651	1e-5	1e-5	0.038083	1e-5	0.070271	0.057709	0.050666	FALSE
I	13490689	13858291	NIC242	CX11307	0.9	208	92	40	367602	#CC9300	23039935	FALSE	NIC2	TRUE	276	6136412	15037759	0.40806692007765255	0	3679491	0.24468346646598074	TRUE	0.59957	C	1e-5	1e-5	0.59957	0.183651	1e-5	1e-5	0.038083	1e-5	0.070271	0.057709	0.050666	FALSE
I	13858291	13861750	AB1	CX11307	1	208	93	35	3459	#FFA000	12133383	FALSE	NIC2	TRUE	276	6136412	15037759	0.40806692007765255	0	3679491	0.24468346646598074	TRUE	0.59957	C	1e-5	1e-5	0.59957	0.183651	1e-5	1e-5	0.038083	1e-5	0.070271	0.057709	0.050666	FALSE
I	13861750	13870749	NIC242	CX11307	0.9	208	94	40	8999	#CC9300	23039935	FALSE	NIC2	TRUE	276	6136412	15037759	0.40806692007765255	0	3679491	0.24468346646598074	TRUE	0.59957	C	1e-5	1e-5	0.59957	0.183651	1e-5	1e-5	0.038083	1e-5	0.070271	0.057709	0.050666	FALSE
I	13870749	13879936	AB1	CX11307	1	208	95	35	9187	#FFA000	12133383	FALSE	NIC2	TRUE	276	6136412	15037759	0.40806692007765255	0	3679491	0.24468346646598074	TRUE	0.59957	C	1e-5	1e-5	0.59957	0.183651	1e-5	1e-5	0.038083	1e-5	0.070271	0.057709	0.050666	FALSE
I	13879936	14108112	NIC242	CX11307	0.9	208	96	40	228176	#CC9300	23039935	FALSE	NIC2	TRUE	276	6136412	15037759	0.40806692007765255	0	3679491	0.24468346646598074	TRUE	0.59957	C	1e-5	1e-5	0.59957	0.183651	1e-5	1e-5	0.038083	1e-5	0.070271	0.057709	0.050666	FALSE
I	14108112	14109917	NIC2	CX11307	1	208	97	1	1805	#CC0000	2453905988	TRUE	NIC2	TRUE	276	6136412	15037759	0.40806692007765255	0	3679491	0.24468346646598074	TRUE	0.59957	C	1e-5	1e-5	0.59957	0.183651	1e-5	1e-5	0.038083	1e-5	0.070271	0.057709	0.050666	FALSE
I	14109917	14146543	MY2693	CX11307	1	208	98	57	36626	#FAFF66	3121741	FALSE	NIC2	TRUE	276	6136412	15037759	0.40806692007765255	0	3679491	0.24468346646598074	TRUE	0.59957	C	1e-5	1e-5	0.59957	0.183651	1e-5	1e-5	0.038083	1e-5	0.070271	0.057709	0.050666	FALSE
I	14146543	14165861	JT11398	CX11307	0.9	208	99	50	19318	#FFE700	5001544	FALSE	NIC2	TRUE	276	6136412	15037759	0.40806692007765255	0	3679491	0.24468346646598074	TRUE	0.59957	C	1e-5	1e-5	0.59957	0.183651	1e-5	1e-5	0.038083	1e-5	0.070271	0.057709	0.050666	FALSE
I	14165861	14218363	NIC2	CX11307	1	208	100	1	52502	#CC0000	2453905988	TRUE	NIC2	TRUE	276	6136412	15037759	0.40806692007765255	0	3679491	0.24468346646598074	TRUE	0.59957	C	1e-5	1e-5	0.59957	0.183651	1e-5	1e-5	0.038083	1e-5	0.070271	0.057709	0.050666	FALSE
I	14218363	14325195	MY2693	CX11307	1	208	101	57	106832	#FAFF66	3121741	FALSE	NIC2	TRUE	276	6136412	15037759	0.40806692007765255	0	3679491	0.24468346646598074	TRUE	0.59957	C	1e-5	1e-5	0.59957	0.183651	1e-5	1e-5	0.038083	1e-5	0.070271	0.057709	0.050666	FALSE
I	14325195	14383192	PX179	CX11307	0.9	208	102	6	57997	#FF7466	26998152	FALSE	NIC2	TRUE	276	6136412	15037759	0.40806692007765255	0	3679491	0.24468346646598074	TRUE	0.59957	C	1e-5	1e-5	0.59957	0.183651	1e-5	1e-5	0.038083	1e-5	0.070271	0.057709	0.050666	FALSE
I	14383192	14494964	MY2693	CX11307	1	208	103	57	111772	#FAFF66	3121741	FALSE	NIC2	TRUE	276	6136412	15037759	0.40806692007765255	0	3679491	0.24468346646598074	TRUE	0.59957	C	1e-5	1e-5	0.59957	0.183651	1e-5	1e-5	0.038083	1e-5	0.070271	0.057709	0.050666	FALSE
I	14494964	14496588	NIC2	CX11307	1	208	104	1	1624	#CC0000	2453905988	TRUE	NIC2	TRUE	276	6136412	15037759	0.40806692007765255	0	3679491	0.24468346646598074	TRUE	0.59957	C	1e-5	1e-5	0.59957	0.183651	1e-5	1e-5	0.038083	1e-5	0.070271	0.057709	0.050666	FALSE
I	14496588	14506257	NIC514	CX11307	0.9	208	105	20	9669	#FF5A00	7684863	FALSE	NIC2	TRUE	276	6136412	15037759	0.40806692007765255	0	3679491	0.24468346646598074	TRUE	0.59957	C	1e-5	1e-5	0.59957	0.183651	1e-5	1e-5	0.038083	1e-5	0.070271	0.057709	0.050666	FALSE
I	14506257	14579706	NIC2	CX11307	1	208	106	1	73449	#CC0000	2453905988	TRUE	NIC2	TRUE	276	6136412	15037759	0.40806692007765255	0	3679491	0.24468346646598074	TRUE	0.59957	C	1e-5	1e-5	0.59957	0.183651	1e-5	1e-5	0.038083	1e-5	0.070271	0.057709	0.050666	FALSE
I	14579706	14591450	NIC514	CX11307	0.9	208	107	20	11744	#FF5A00	7684863	FALSE	NIC2	TRUE	276	6136412	15037759	0.40806692007765255	0	3679491	0.24468346646598074	TRUE	0.59957	C	1e-5	1e-5	0.59957	0.183651	1e-5	1e-5	0.038083	1e-5	0.070271	0.057709	0.050666	FALSE
I	14591450	15041422	NIC2	CX11307	1	208	108	1	449972	#CC0000	2453905988	TRUE	NIC2	TRUE	276	6136412	15037759	0.40806692007765255	0	3679491	0.24468346646598074	TRUE	0.59957	C	1e-5	1e-5	0.59957	0.183651	1e-5	1e-5	0.038083	1e-5	0.070271	0.057709	0.050666	FALSE
I	3663	448892	QG536	CX11314	1	178	1	7	445229	#CC1700	59985814	FALSE	NIC2	TRUE	276	9159000	15037759	0.6090668164052901	0	7800462	0.5187250307708748	TRUE	0.9999	C	1e-5	1e-5	0.9999	1e-5	1e-5	1e-5	1e-5	1e-5	1e-5	1e-5	1e-5	FALSE
I	448892	528414	ED3048	CX11314	0.9	178	2	4	79522	#CC0B00	150684368	FALSE	NIC2	TRUE	276	9159000	15037759	0.6090668164052901	0	7800462	0.5187250307708748	TRUE	0.9999	C	1e-5	1e-5	0.9999	1e-5	1e-5	1e-5	1e-5	1e-5	1e-5	1e-5	1e-5	FALSE
I	528414	835064	QG536	CX11314	1	178	3	7	306650	#CC1700	59985814	FALSE	NIC2	TRUE	276	9159000	15037759	0.6090668164052901	0	7800462	0.5187250307708748	TRUE	0.9999	C	1e-5	1e-5	0.9999	1e-5	1e-5	1e-5	1e-5	1e-5	1e-5	1e-5	1e-5	FALSE
I	835064	843028	ED3048	CX11314	0.9	178	4	4	7964	#CC0B00	150684368	FALSE	NIC2	TRUE	276	9159000	15037759	0.6090668164052901	0	7800462	0.5187250307708748	TRUE	0.9999	C	1e-5	1e-5	0.9999	1e-5	1e-5	1e-5	1e-5	1e-5	1e-5	1e-5	1e-5	FALSE
I	843028	844068	QG536	CX11314	1	178	5	7	1040	#CC1700	59985814	FALSE	NIC2	TRUE	276	9159000	15037759	0.6090668164052901	0	7800462	0.5187250307708748	TRUE	0.9999	C	1e-5	1e-5	0.9999	1e-5	1e-5	1e-5	1e-5	1e-5	1e-5	1e-5	1e-5	FALSE
I	844068	864435	NIC2	CX11314	1	178	6	1	20367	#CC0000	2453905988	TRUE	NIC2	TRUE	276	9159000	15037759	0.6090668164052901	0	7800462	0.5187250307708748	TRUE	0.9999	C	1e-5	1e-5	0.9999	1e-5	1e-5	1e-5	1e-5	1e-5	1e-5	1e-5	1e-5	FALSE
I	864435	1017980	QG536	CX11314	1	178	7	7	153545	#CC1700	59985814	FALSE	NIC2	TRUE	276	9159000	15037759	0.6090668164052901	0	7800462	0.5187250307708748	TRUE	0.9999	C	1e-5	1e-5	0.9999	1e-5	1e-5	1e-5	1e-5	1e-5	1e-5	1e-5	1e-5	FALSE
I	1017980	1049837	NIC2	CX11314	1	178	8	1	31857	#CC0000	2453905988	TRUE	NIC2	TRUE	276	9159000	15037759	0.6090668164052901	0	7800462	0.5187250307708748	TRUE	0.9999	C	1e-5	1e-5	0.9999	1e-5	1e-5	1e-5	1e-5	1e-5	1e-5	1e-5	1e-5	FALSE
I	1049837	1091061	QG536	CX11314	1	178	9	7	41224	#CC1700	59985814	FALSE	NIC2	TRUE	276	9159000	15037759	0.6090668164052901	0	7800462	0.5187250307708748	TRUE	0.9999	C	1e-5	1e-5	0.9999	1e-5	1e-5	1e-5	1e-5	1e-5	1e-5	1e-5	1e-5	FALSE
I	1091061	1136414	NIC2	CX11314	1	178	10	1	45353	#CC0000	2453905988	TRUE	NIC2	TRUE	276	9159000	15037759	0.6090668164052901	0	7800462	0.5187250307708748	TRUE	0.9999	C	1e-5	1e-5	0.9999	1e-5	1e-5	1e-5	1e-5	1e-5	1e-5	1e-5	1e-5	FALSE
I	1136414	1150297	QG536	CX11314	1	178	11	7	13883	#CC1700	59985814	FALSE	NIC2	TRUE	276	9159000	15037759	0.6090668164052901	0	7800462	0.5187250307708748	TRUE	0.9999	C	1e-5	1e-5	0.9999	1e-5	1e-5	1e-5	1e-5	1e-5	1e-5	1e-5	1e-5	FALSE
I	1150297	1175482	ED3048	CX11314	0.9	178	12	4	25185	#CC0B00	150684368	FALSE	NIC2	TRUE	276	9159000	15037759	0.6090668164052901	0	7800462	0.5187250307708748	TRUE	0.9999	C	1e-5	1e-5	0.9999	1e-5	1e-5	1e-5	1e-5	1e-5	1e-5	1e-5	1e-5	FALSE
I	1175482	1182670	QG536	CX11314	1	178	13	7	7188	#CC1700	59985814	FALSE	NIC2	TRUE	276	9159000	15037759	0.6090668164052901	0	7800462	0.5187250307708748	TRUE	0.9999	C	1e-5	1e-5	0.9999	1e-5	1e-5	1e-5	1e-5	1e-5	1e-5	1e-5	1e-5	FALSE
I	1182670	1190482	ED3048	CX11314	0.9	178	14	4	7812	#CC0B00	150684368	FALSE	NIC2	TRUE	276	9159000	15037759	0.6090668164052901	0	7800462	0.5187250307708748	TRUE	0.9999	C	1e-5	1e-5	0.9999	1e-5	1e-5	1e-5	1e-5	1e-5	1e-5	1e-5	1e-5	FALSE
I	1190482	1242553	NIC2	CX11314	1	178	15	1	52071	#CC0000	2453905988	TRUE	NIC2	TRUE	276	9159000	15037759	0.6090668164052901	0	7800462	0.5187250307708748	TRUE	0.9999	C	1e-5	1e-5	0.9999	1e-5	1e-5	1e-5	1e-5	1e-5	1e-5	1e-5	1e-5	FALSE
I	1242553	1344494	ED3048	CX11314	0.9	178	16	4	101941	#CC0B00	150684368	FALSE	NIC2	TRUE	276	9159000	15037759	0.6090668164052901	0	7800462	0.5187250307708748	TRUE	0.9999	C	1e-5	1e-5	0.9999	1e-5	1e-5	1e-5	1e-5	1e-5	1e-5	1e-5	1e-5	FALSE
I	1344494	1420764	NIC2	CX11314	1	178	17	1	76270	#CC0000	2453905988	TRUE	NIC2	TRUE	276	9159000	15037759	0.6090668164052901	0	7800462	0.5187250307708748	TRUE	0.9999	C	1e-5	1e-5	0.9999	1e-5	1e-5	1e-5	1e-5	1e-5	1e-5	1e-5	1e-5	FALSE
I	1420764	1443616	ED3048	CX11314	0.9	178	18	4	22852	#CC0B00	150684368	FALSE	NIC2	TRUE	276	9159000	15037759	0.6090668164052901	0	7800462	0.5187250307708748	TRUE	0.9999	C	1e-5	1e-5	0.9999	1e-5	1e-5	1e-5	1e-5	1e-5	1e-5	1e-5	1e-5	FALSE
I	1443616	1454609	QG536	CX11314	1	178	19	7	10993	#CC1700	59985814	FALSE	NIC2	TRUE	276	9159000	15037759	0.6090668164052901	0	7800462	0.5187250307708748	TRUE	0.9999	C	1e-5	1e-5	0.9999	1e-5	1e-5	1e-5	1e-5	1e-5	1e-5	1e-5	1e-5	FALSE
I	1454609	1463349	NIC2	CX11314	1	178	20	1	8740	#CC0000	2453905988	TRUE	NIC2	TRUE	276	9159000	15037759	0.6090668164052901	0	7800462	0.5187250307708748	TRUE	0.9999	C	1e-5	1e-5	0.9999	1e-5	1e-5	1e-5	1e-5	1e-5	1e-5	1e-5	1e-5	FALSE
I	1463349	1486678	QG536	CX11314	1	178	21	7	23329	#CC1700	59985814	FALSE	NIC2	TRUE	276	9159000	15037759	0.6090668164052901	0	7800462	0.5187250307708748	TRUE	0.9999	C	1e-5	1e-5	0.9999	1e-5	1e-5	1e-5	1e-5	1e-5	1e-5	1e-5	1e-5	FALSE
I	1486678	1610423	NIC2	CX11314	1	178	22	1	123745	#CC0000	2453905988	TRUE	NIC2	TRUE	276	9159000	15037759	0.6090668164052901	0	7800462	0.5187250307708748	TRUE	0.9999	C	1e-5	1e-5	0.9999	1e-5	1e-5	1e-5	1e-5	1e-5	1e-5	1e-5	1e-5	FALSE
I	1610423	1640212	ED3048	CX11314	0.9	178	23	4	29789	#CC0B00	150684368	FALSE	NIC2	TRUE	276	9159000	15037759	0.6090668164052901	0	7800462	0.5187250307708748	TRUE	0.9999	C	1e-5	1e-5	0.9999	1e-5	1e-5	1e-5	1e-5	1e-5	1e-5	1e-5	1e-5	FALSE
I	1640212	1660874	NIC2	CX11314	1	178	24	1	20662	#CC0000	2453905988	TRUE	NIC2	TRUE	276	9159000	15037759	0.6090668164052901	0	7800462	0.5187250307708748	TRUE	0.9999	C	1e-5	1e-5	0.9999	1e-5	1e-5	1e-5	1e-5	1e-5	1e-5	1e-5	1e-5	FALSE
I	1660874	1750821	ED3048	CX11314	0.9	178	25	4	89947	#CC0B00	150684368	FALSE	NIC2	TRUE	276	9159000	15037759	0.6090668164052901	0	7800462	0.5187250307708748	TRUE	0.9999	C	1e-5	1e-5	0.9999	1e-5	1e-5	1e-5	1e-5	1e-5	1e-5	1e-5	1e-5	FALSE
I	1750821	1781567	NIC2	CX11314	1	178	26	1	30746	#CC0000	2453905988	TRUE	NIC2	TRUE	276	9159000	15037759	0.6090668164052901	0	7800462	0.5187250307708748	TRUE	0.9999	C	1e-5	1e-5	0.9999	1e-5	1e-5	1e-5	1e-5	1e-5	1e-5	1e-5	1e-5	FALSE
I	1781567	1825779	ED3048	CX11314	0.9	178	27	4	44212	#CC0B00	150684368	FALSE	NIC2	TRUE	276	9159000	15037759	0.6090668164052901	0	7800462	0.5187250307708748	TRUE	0.9999	C	1e-5	1e-5	0.9999	1e-5	1e-5	1e-5	1e-5	1e-5	1e-5	1e-5	1e-5	FALSE
I	1825779	1829697	NIC2	CX11314	1	178	28	1	3918	#CC0000	2453905988	TRUE	NIC2	TRUE	276	9159000	15037759	0.6090668164052901	0	7800462	0.5187250307708748	TRUE	0.9999	C	1e-5	1e-5	0.9999	1e-5	1e-5	1e-5	1e-5	1e-5	1e-5	1e-5	1e-5	FALSE
I	1829697	1851727	ED3048	CX11314	0.9	178	29	4	22030	#CC0B00	150684368	FALSE	NIC2	TRUE	276	9159000	15037759	0.6090668164052901	0	7800462	0.5187250307708748	TRUE	0.9999	C	1e-5	1e-5	0.9999	1e-5	1e-5	1e-5	1e-5	1e-5	1e-5	1e-5	1e-5	FALSE
I	1851727	1874368	NIC2	CX11314	1	178	30	1	22641	#CC0000	2453905988	TRUE	NIC2	TRUE	276	9159000	15037759	0.6090668164052901	0	7800462	0.5187250307708748	TRUE	0.9999	C	1e-5	1e-5	0.9999	1e-5	1e-5	1e-5	1e-5	1e-5	1e-5	1e-5	1e-5	FALSE
I	1874368	1881920	ED3048	CX11314	0.9	178	31	4	7552	#CC0B00	150684368	FALSE	NIC2	TRUE	276	9159000	15037759	0.6090668164052901	0	7800462	0.5187250307708748	TRUE	0.9999	C	1e-5	1e-5	0.9999	1e-5	1e-5	1e-5	1e-5	1e-5	1e-5	1e-5	1e-5	FALSE
I	1881920	1913957	NIC2	CX11314	1	178	32	1	32037	#CC0000	2453905988	TRUE	NIC2	TRUE	276	9159000	15037759	0.6090668164052901	0	7800462	0.5187250307708748	TRUE	0.9999	C	1e-5	1e-5	0.9999	1e-5	1e-5	1e-5	1e-5	1e-5	1e-5	1e-5	1e-5	FALSE
I	1913957	1922747	ED3048	CX11314	0.9	178	33	4	8790	#CC0B00	150684368	FALSE	NIC2	TRUE	276	9159000	15037759	0.6090668164052901	0	7800462	0.5187250307708748	TRUE	0.9999	C	1e-5	1e-5	0.9999	1e-5	1e-5	1e-5	1e-5	1e-5	1e-5	1e-5	1e-5	FALSE
I	1922747	1974234	NIC2	CX11314	1	178	34	1	51487	#CC0000	2453905988	TRUE	NIC2	TRUE	276	9159000	15037759	0.6090668164052901	0	7800462	0.5187250307708748	TRUE	0.9999	C	1e-5	1e-5	0.9999	1e-5	1e-5	1e-5	1e-5	1e-5	1e-5	1e-5	1e-5	FALSE
I	1974234	1981352	ED3048	CX11314	0.9	178	35	4	7118	#CC0B00	150684368	FALSE	NIC2	TRUE	276	9159000	15037759	0.6090668164052901	0	7800462	0.5187250307708748	TRUE	0.9999	C	1e-5	1e-5	0.9999	1e-5	1e-5	1e-5	1e-5	1e-5	1e-5	1e-5	1e-5	FALSE
I	1981352	2040543	NIC2	CX11314	1	178	36	1	59191	#CC0000	2453905988	TRUE	NIC2	TRUE	276	9159000	15037759	0.6090668164052901	0	7800462	0.5187250307708748	TRUE	0.9999	C	1e-5	1e-5	0.9999	1e-5	1e-5	1e-5	1e-5	1e-5	1e-5	1e-5	1e-5	FALSE
I	2040543	2161780	ED3048	CX11314	0.9	178	37	4	121237	#CC0B00	150684368	FALSE	NIC2	TRUE	276	9159000	15037759	0.6090668164052901	0	7800462	0.5187250307708748	TRUE	0.9999	C	1e-5	1e-5	0.9999	1e-5	1e-5	1e-5	1e-5	1e-5	1e-5	1e-5	1e-5	FALSE
I	2161780	2176348	NIC2	CX11314	1	178	38	1	14568	#CC0000	2453905988	TRUE	NIC2	TRUE	276	9159000	15037759	0.6090668164052901	0	7800462	0.5187250307708748	TRUE	0.9999	C	1e-5	1e-5	0.9999	1e-5	1e-5	1e-5	1e-5	1e-5	1e-5	1e-5	1e-5	FALSE
I	2176348	2190339	ED3048	CX11314	0.9	178	39	4	13991	#CC0B00	150684368	FALSE	NIC2	TRUE	276	9159000	15037759	0.6090668164052901	0	7800462	0.5187250307708748	TRUE	0.9999	C	1e-5	1e-5	0.9999	1e-5	1e-5	1e-5	1e-5	1e-5	1e-5	1e-5	1e-5	FALSE
I	2190339	2204010	NIC2	CX11314	1	178	40	1	13671	#CC0000	2453905988	TRUE	NIC2	TRUE	276	9159000	15037759	0.6090668164052901	0	7800462	0.5187250307708748	TRUE	0.9999	C	1e-5	1e-5	0.9999	1e-5	1e-5	1e-5	1e-5	1e-5	1e-5	1e-5	1e-5	FALSE
I	2204010	2465076	ED3048	CX11314	0.9	178	41	4	261066	#CC0B00	150684368	FALSE	NIC2	TRUE	276	9159000	15037759	0.6090668164052901	0	7800462	0.5187250307708748	TRUE	0.9999	C	1e-5	1e-5	0.9999	1e-5	1e-5	1e-5	1e-5	1e-5	1e-5	1e-5	1e-5	FALSE
I	2465076	2468912	NIC2	CX11314	1	178	42	1	3836	#CC0000	2453905988	TRUE	NIC2	TRUE	276	9159000	15037759	0.6090668164052901	0	7800462	0.5187250307708748	TRUE	0.9999	C	1e-5	1e-5	0.9999	1e-5	1e-5	1e-5	1e-5	1e-5	1e-5	1e-5	1e-5	FALSE
I	2468912	2500102	ED3048	CX11314	0.9	178	43	4	31190	#CC0B00	150684368	FALSE	NIC2	TRUE	276	9159000	15037759	0.6090668164052901	0	7800462	0.5187250307708748	TRUE	0.9999	C	1e-5	1e-5	0.9999	1e-5	1e-5	1e-5	1e-5	1e-5	1e-5	1e-5	1e-5	FALSE
I	2500102	2513751	NIC2	CX11314	1	178	44	1	13649	#CC0000	2453905988	TRUE	NIC2	TRUE	276	9159000	15037759	0.6090668164052901	0	7800462	0.5187250307708748	TRUE	0.9999	C	1e-5	1e-5	0.9999	1e-5	1e-5	1e-5	1e-5	1e-5	1e-5	1e-5	1e-5	FALSE
I	2513751	2576070	ED3048	CX11314	0.9	178	45	4	62319	#CC0B00	150684368	FALSE	NIC2	TRUE	276	9159000	15037759	0.6090668164052901	0	7800462	0.5187250307708748	TRUE	0.9999	C	1e-5	1e-5	0.9999	1e-5	1e-5	1e-5	1e-5	1e-5	1e-5	1e-5	1e-5	FALSE
I	2576070	2785019	NIC2	CX11314	1	178	46	1	208949	#CC0000	2453905988	TRUE	NIC2	TRUE	276	9159000	15037759	0.6090668164052901	0	7800462	0.5187250307708748	TRUE	0.9999	C	1e-5	1e-5	0.9999	1e-5	1e-5	1e-5	1e-5	1e-5	1e-5	1e-5	1e-5	FALSE
I	2785019	2864069	ED3048	CX11314	0.9	178	47	4	79050	#CC0B00	150684368	FALSE	NIC2	TRUE	276	9159000	15037759	0.6090668164052901	0	7800462	0.5187250307708748	TRUE	0.9999	C	1e-5	1e-5	0.9999	1e-5	1e-5	1e-5	1e-5	1e-5	1e-5	1e-5	1e-5	FALSE
I	2864069	2866511	NIC2	CX11314	1	178	48	1	2442	#CC0000	2453905988	TRUE	NIC2	TRUE	276	9159000	15037759	0.6090668164052901	0	7800462	0.5187250307708748	TRUE	0.9999	C	1e-5	1e-5	0.9999	1e-5	1e-5	1e-5	1e-5	1e-5	1e-5	1e-5	1e-5	FALSE
I	2866511	2867958	ED3048	CX11314	0.9	178	49	4	1447	#CC0B00	150684368	FALSE	NIC2	TRUE	276	9159000	15037759	0.6090668164052901	0	7800462	0.5187250307708748	TRUE	0.9999	C	1e-5	1e-5	0.9999	1e-5	1e-5	1e-5	1e-5	1e-5	1e-5	1e-5	1e-5	FALSE
I	2867958	2886099	NIC2	CX11314	1	178	50	1	18141	#CC0000	2453905988	TRUE	NIC2	TRUE	276	9159000	15037759	0.6090668164052901	0	7800462	0.5187250307708748	TRUE	0.9999	C	1e-5	1e-5	0.9999	1e-5	1e-5	1e-5	1e-5	1e-5	1e-5	1e-5	1e-5	FALSE
I	2886099	2936666	EG4946	CX11314	1	178	51	19	50567	#CC4400	33166819	FALSE	NIC2	TRUE	276	9159000	15037759	0.6090668164052901	0	7800462	0.5187250307708748	TRUE	0.9999	C	1e-5	1e-5	0.9999	1e-5	1e-5	1e-5	1e-5	1e-5	1e-5	1e-5	1e-5	FALSE
I	2936666	3018467	NIC2	CX11314	1	178	52	1	81801	#CC0000	2453905988	TRUE	NIC2	TRUE	276	9159000	15037759	0.6090668164052901	0	7800462	0.5187250307708748	TRUE	0.9999	C	1e-5	1e-5	0.9999	1e-5	1e-5	1e-5	1e-5	1e-5	1e-5	1e-5	1e-5	FALSE
I	3018467	3046978	EG4946	CX11314	1	178	53	19	28511	#CC4400	33166819	FALSE	NIC2	TRUE	276	9159000	15037759	0.6090668164052901	0	7800462	0.5187250307708748	TRUE	0.9999	C	1e-5	1e-5	0.9999	1e-5	1e-5	1e-5	1e-5	1e-5	1e-5	1e-5	1e-5	FALSE
I	3046978	3047977	NIC2	CX11314	1	178	54	1	999	#CC0000	2453905988	TRUE	NIC2	TRUE	276	9159000	15037759	0.6090668164052901	0	7800462	0.5187250307708748	TRUE	0.9999	C	1e-5	1e-5	0.9999	1e-5	1e-5	1e-5	1e-5	1e-5	1e-5	1e-5	1e-5	FALSE
I	3047977	3064995	EG4946	CX11314	1	178	55	19	17018	#CC4400	33166819	FALSE	NIC2	TRUE	276	9159000	15037759	0.6090668164052901	0	7800462	0.5187250307708748	TRUE	0.9999	C	1e-5	1e-5	0.9999	1e-5	1e-5	1e-5	1e-5	1e-5	1e-5	1e-5	1e-5	FALSE
I	3064995	3104790	NIC2	CX11314	1	178	56	1	39795	#CC0000	2453905988	TRUE	NIC2	TRUE	276	9159000	15037759	0.6090668164052901	0	7800462	0.5187250307708748	TRUE	0.9999	C	1e-5	1e-5	0.9999	1e-5	1e-5	1e-5	1e-5	1e-5	1e-5	1e-5	1e-5	FALSE
I	3104790	3410583	EG4946	CX11314	1	178	57	19	305793	#CC4400	33166819	FALSE	NIC2	TRUE	276	9159000	15037759	0.6090668164052901	0	7800462	0.5187250307708748	TRUE	0.9999	C	1e-5	1e-5	0.9999	1e-5	1e-5	1e-5	1e-5	1e-5	1e-5	1e-5	1e-5	FALSE
I	3410583	3421647	NIC2	CX11314	1	178	58	1	11064	#CC0000	2453905988	TRUE	NIC2	TRUE	276	9159000	15037759	0.6090668164052901	0	7800462	0.5187250307708748	TRUE	0.9999	C	1e-5	1e-5	0.9999	1e-5	1e-5	1e-5	1e-5	1e-5	1e-5	1e-5	1e-5	FALSE
I	3421647	3559173	EG4946	CX11314	1	178	59	19	137526	#CC4400	33166819	FALSE	NIC2	TRUE	276	9159000	15037759	0.6090668164052901	0	7800462	0.5187250307708748	TRUE	0.9999	C	1e-5	1e-5	0.9999	1e-5	1e-5	1e-5	1e-5	1e-5	1e-5	1e-5	1e-5	FALSE
I	3559173	3585161	NIC2	CX11314	1	178	60	1	25988	#CC0000	2453905988	TRUE	NIC2	TRUE	276	9159000	15037759	0.6090668164052901	0	7800462	0.5187250307708748	TRUE	0.9999	C	1e-5	1e-5	0.9999	1e-5	1e-5	1e-5	1e-5	1e-5	1e-5	1e-5	1e-5	FALSE
I	3585161	4360210	EG4946	CX11314	1	178	61	19	775049	#CC4400	33166819	FALSE	NIC2	TRUE	276	9159000	15037759	0.6090668164052901	0	7800462	0.5187250307708748	TRUE	0.9999	C	1e-5	1e-5	0.9999	1e-5	1e-5	1e-5	1e-5	1e-5	1e-5	1e-5	1e-5	FALSE
I	4360210	9946989	NIC2	CX11314	1	178	62	1	5586779	#CC0000	2453905988	TRUE	NIC2	TRUE	276	9159000	15037759	0.6090668164052901	5586779	7800462	0.5187250307708748	TRUE	0.9999	C	1e-5	1e-5	0.9999	1e-5	1e-5	1e-5	1e-5	1e-5	1e-5	1e-5	1e-5	FALSE
I	9946989	10351020	EG4347	CX11314	1	178	63	5	404031	#FF1300	122541644	FALSE	NIC2	TRUE	276	9159000	15037759	0.6090668164052901	0	7800462	0.5187250307708748	TRUE	0.9999	C	1e-5	1e-5	0.9999	1e-5	1e-5	1e-5	1e-5	1e-5	1e-5	1e-5	1e-5	FALSE
I	10351020	10354853	NIC2	CX11314	1	178	64	1	3833	#CC0000	2453905988	TRUE	NIC2	TRUE	276	9159000	15037759	0.6090668164052901	0	7800462	0.5187250307708748	TRUE	0.9999	C	1e-5	1e-5	0.9999	1e-5	1e-5	1e-5	1e-5	1e-5	1e-5	1e-5	1e-5	FALSE
I	10354853	10634911	EG4347	CX11314	1	178	65	5	280058	#FF1300	122541644	FALSE	NIC2	TRUE	276	9159000	15037759	0.6090668164052901	0	7800462	0.5187250307708748	TRUE	0.9999	C	1e-5	1e-5	0.9999	1e-5	1e-5	1e-5	1e-5	1e-5	1e-5	1e-5	1e-5	FALSE
I	10634911	10639190	NIC2	CX11314	1	178	66	1	4279	#CC0000	2453905988	TRUE	NIC2	TRUE	276	9159000	15037759	0.6090668164052901	0	7800462	0.5187250307708748	TRUE	0.9999	C	1e-5	1e-5	0.9999	1e-5	1e-5	1e-5	1e-5	1e-5	1e-5	1e-5	1e-5	FALSE
I	10639190	10883065	EG4347	CX11314	1	178	67	5	243875	#FF1300	122541644	FALSE	NIC2	TRUE	276	9159000	15037759	0.6090668164052901	0	7800462	0.5187250307708748	TRUE	0.9999	C	1e-5	1e-5	0.9999	1e-5	1e-5	1e-5	1e-5	1e-5	1e-5	1e-5	1e-5	FALSE
I	10883065	10908578	NIC2	CX11314	1	178	68	1	25513	#CC0000	2453905988	TRUE	NIC2	TRUE	276	9159000	15037759	0.6090668164052901	0	7800462	0.5187250307708748	TRUE	0.9999	C	1e-5	1e-5	0.9999	1e-5	1e-5	1e-5	1e-5	1e-5	1e-5	1e-5	1e-5	FALSE
I	10908578	11396234	EG4347	CX11314	1	178	69	5	487656	#FF1300	122541644	FALSE	NIC2	TRUE	276	9159000	15037759	0.6090668164052901	0	7800462	0.5187250307708748	TRUE	0.9999	C	1e-5	1e-5	0.9999	1e-5	1e-5	1e-5	1e-5	1e-5	1e-5	1e-5	1e-5	FALSE
I	11396234	11460051	NIC2	CX11314	1	178	70	1	63817	#CC0000	2453905988	TRUE	NIC2	TRUE	276	9159000	15037759	0.6090668164052901	0	7800462	0.5187250307708748	TRUE	0.9999	C	1e-5	1e-5	0.9999	1e-5	1e-5	1e-5	1e-5	1e-5	1e-5	1e-5	1e-5	FALSE
I	11460051	11503320	EG4347	CX11314	1	178	71	5	43269	#FF1300	122541644	FALSE	NIC2	TRUE	276	9159000	15037759	0.6090668164052901	0	7800462	0.5187250307708748	TRUE	0.9999	C	1e-5	1e-5	0.9999	1e-5	1e-5	1e-5	1e-5	1e-5	1e-5	1e-5	1e-5	FALSE
I	11503320	11551724	NIC2	CX11314	1	178	72	1	48404	#CC0000	2453905988	TRUE	NIC2	TRUE	276	9159000	15037759	0.6090668164052901	0	7800462	0.5187250307708748	TRUE	0.9999	C	1e-5	1e-5	0.9999	1e-5	1e-5	1e-5	1e-5	1e-5	1e-5	1e-5	1e-5	FALSE
I	11551724	12236997	EG4347	CX11314	1	178	73	5	685273	#FF1300	122541644	FALSE	NIC2	TRUE	276	9159000	15037759	0.6090668164052901	0	7800462	0.5187250307708748	TRUE	0.9999	C	1e-5	1e-5	0.9999	1e-5	1e-5	1e-5	1e-5	1e-5	1e-5	1e-5	1e-5	FALSE
I	12236997	12435701	NIC2	CX11314	1	178	74	1	198704	#CC0000	2453905988	TRUE	NIC2	TRUE	276	9159000	15037759	0.6090668164052901	0	7800462	0.5187250307708748	TRUE	0.9999	C	1e-5	1e-5	0.9999	1e-5	1e-5	1e-5	1e-5	1e-5	1e-5	1e-5	1e-5	FALSE
I	12435701	12618732	EG4347	CX11314	1	178	75	5	183031	#FF1300	122541644	FALSE	NIC2	TRUE	276	9159000	15037759	0.6090668164052901	0	7800462	0.5187250307708748	TRUE	0.9999	C	1e-5	1e-5	0.9999	1e-5	1e-5	1e-5	1e-5	1e-5	1e-5	1e-5	1e-5	FALSE
I	12618732	14832415	NIC2	CX11314	1	178	76	1	2213683	#CC0000	2453905988	TRUE	NIC2	TRUE	276	9159000	15037759	0.6090668164052901	2213683	7800462	0.5187250307708748	TRUE	0.9999	C	1e-5	1e-5	0.9999	1e-5	1e-5	1e-5	1e-5	1e-5	1e-5	1e-5	1e-5	FALSE
I	14832415	15041422	CX11271	CX11314	1	178	77	23	209007	#FF6800	5445413	FALSE	NIC2	TRUE	276	9159000	15037759	0.6090668164052901	0	7800462	0.5187250307708748	TRUE	0.9999	C	1e-5	1e-5	0.9999	1e-5	1e-5	1e-5	1e-5	1e-5	1e-5	1e-5	1e-5	FALSE
I	3663	125090	CX11315	CX11315	0.9	142	1	142	121427	#00CC7C	1920943	FALSE	NIC2	TRUE	276	10203419	15037759	0.6785199177616824	0	9396713	0.624874557439044	TRUE	0.855784	C	1e-5	1e-5	0.855784	0.144126	1e-5	1e-5	1e-5	1e-5	1e-5	1e-5	1e-5	FALSE
I	125090	874281	ED3048	CX11315	0.9	142	2	4	749191	#CC0B00	150684368	FALSE	NIC2	TRUE	276	10203419	15037759	0.6785199177616824	0	9396713	0.624874557439044	TRUE	0.855784	C	1e-5	1e-5	0.855784	0.144126	1e-5	1e-5	1e-5	1e-5	1e-5	1e-5	1e-5	FALSE
I	874281	880171	NIC515	CX11315	1	142	3	55	5890	#CCCC00	3080288	FALSE	NIC2	TRUE	276	10203419	15037759	0.6785199177616824	0	9396713	0.624874557439044	TRUE	0.855784	C	1e-5	1e-5	0.855784	0.144126	1e-5	1e-5	1e-5	1e-5	1e-5	1e-5	1e-5	FALSE
I	880171	1051922	JU2866	CX11315	1	142	4	137	171751	#00FF83	6107741	FALSE	NIC2	TRUE	276	10203419	15037759	0.6785199177616824	0	9396713	0.624874557439044	TRUE	0.855784	C	1e-5	1e-5	0.855784	0.144126	1e-5	1e-5	1e-5	1e-5	1e-5	1e-5	1e-5	FALSE
I	1051922	1091061	QG536	CX11315	1	142	5	7	39139	#CC1700	59985814	FALSE	NIC2	TRUE	276	10203419	15037759	0.6785199177616824	0	9396713	0.624874557439044	TRUE	0.855784	C	1e-5	1e-5	0.855784	0.144126	1e-5	1e-5	1e-5	1e-5	1e-5	1e-5	1e-5	FALSE
I	1091061	1136414	NIC2	CX11315	1	142	6	1	45353	#CC0000	2453905988	TRUE	NIC2	TRUE	276	10203419	15037759	0.6785199177616824	0	9396713	0.624874557439044	TRUE	0.855784	C	1e-5	1e-5	0.855784	0.144126	1e-5	1e-5	1e-5	1e-5	1e-5	1e-5	1e-5	FALSE
I	1136414	1150297	QG536	CX11315	1	142	7	7	13883	#CC1700	59985814	FALSE	NIC2	TRUE	276	10203419	15037759	0.6785199177616824	0	9396713	0.624874557439044	TRUE	0.855784	C	1e-5	1e-5	0.855784	0.144126	1e-5	1e-5	1e-5	1e-5	1e-5	1e-5	1e-5	FALSE
I	1150297	1175482	ED3048	CX11315	0.9	142	8	4	25185	#CC0B00	150684368	FALSE	NIC2	TRUE	276	10203419	15037759	0.6785199177616824	0	9396713	0.624874557439044	TRUE	0.855784	C	1e-5	1e-5	0.855784	0.144126	1e-5	1e-5	1e-5	1e-5	1e-5	1e-5	1e-5	FALSE
I	1175482	1182670	QG536	CX11315	1	142	9	7	7188	#CC1700	59985814	FALSE	NIC2	TRUE	276	10203419	15037759	0.6785199177616824	0	9396713	0.624874557439044	TRUE	0.855784	C	1e-5	1e-5	0.855784	0.144126	1e-5	1e-5	1e-5	1e-5	1e-5	1e-5	1e-5	FALSE
I	1182670	1190482	ED3048	CX11315	0.9	142	10	4	7812	#CC0B00	150684368	FALSE	NIC2	TRUE	276	10203419	15037759	0.6785199177616824	0	9396713	0.624874557439044	TRUE	0.855784	C	1e-5	1e-5	0.855784	0.144126	1e-5	1e-5	1e-5	1e-5	1e-5	1e-5	1e-5	FALSE
I	1190482	1242553	NIC2	CX11315	1	142	11	1	52071	#CC0000	2453905988	TRUE	NIC2	TRUE	276	10203419	15037759	0.6785199177616824	0	9396713	0.624874557439044	TRUE	0.855784	C	1e-5	1e-5	0.855784	0.144126	1e-5	1e-5	1e-5	1e-5	1e-5	1e-5	1e-5	FALSE
I	1242553	1344494	ED3048	CX11315	0.9	142	12	4	101941	#CC0B00	150684368	FALSE	NIC2	TRUE	276	10203419	15037759	0.6785199177616824	0	9396713	0.624874557439044	TRUE	0.855784	C	1e-5	1e-5	0.855784	0.144126	1e-5	1e-5	1e-5	1e-5	1e-5	1e-5	1e-5	FALSE
I	1344494	1420764	NIC2	CX11315	1	142	13	1	76270	#CC0000	2453905988	TRUE	NIC2	TRUE	276	10203419	15037759	0.6785199177616824	0	9396713	0.624874557439044	TRUE	0.855784	C	1e-5	1e-5	0.855784	0.144126	1e-5	1e-5	1e-5	1e-5	1e-5	1e-5	1e-5	FALSE
I	1420764	1486678	ED3048	CX11315	0.9	142	14	4	65914	#CC0B00	150684368	FALSE	NIC2	TRUE	276	10203419	15037759	0.6785199177616824	0	9396713	0.624874557439044	TRUE	0.855784	C	1e-5	1e-5	0.855784	0.144126	1e-5	1e-5	1e-5	1e-5	1e-5	1e-5	1e-5	FALSE
I	1486678	1492117	NIC2	CX11315	1	142	15	1	5439	#CC0000	2453905988	TRUE	NIC2	TRUE	276	10203419	15037759	0.6785199177616824	0	9396713	0.624874557439044	TRUE	0.855784	C	1e-5	1e-5	0.855784	0.144126	1e-5	1e-5	1e-5	1e-5	1e-5	1e-5	1e-5	FALSE
I	1492117	1496191	CX11271	CX11315	1	142	16	23	4074	#FF6800	5445413	FALSE	NIC2	TRUE	276	10203419	15037759	0.6785199177616824	0	9396713	0.624874557439044	TRUE	0.855784	C	1e-5	1e-5	0.855784	0.144126	1e-5	1e-5	1e-5	1e-5	1e-5	1e-5	1e-5	FALSE
I	1496191	1502794	NIC2	CX11315	1	142	17	1	6603	#CC0000	2453905988	TRUE	NIC2	TRUE	276	10203419	15037759	0.6785199177616824	0	9396713	0.624874557439044	TRUE	0.855784	C	1e-5	1e-5	0.855784	0.144126	1e-5	1e-5	1e-5	1e-5	1e-5	1e-5	1e-5	FALSE
I	1502794	1547144	CX11271	CX11315	1	142	18	23	44350	#FF6800	5445413	FALSE	NIC2	TRUE	276	10203419	15037759	0.6785199177616824	0	9396713	0.624874557439044	TRUE	0.855784	C	1e-5	1e-5	0.855784	0.144126	1e-5	1e-5	1e-5	1e-5	1e-5	1e-5	1e-5	FALSE
I	1547144	1664344	CX11315	CX11315	0.9	142	19	142	117200	#00CC7C	1920943	FALSE	NIC2	TRUE	276	10203419	15037759	0.6785199177616824	0	9396713	0.624874557439044	TRUE	0.855784	C	1e-5	1e-5	0.855784	0.144126	1e-5	1e-5	1e-5	1e-5	1e-5	1e-5	1e-5	FALSE
I	1664344	1667370	ED3048	CX11315	0.9	142	20	4	3026	#CC0B00	150684368	FALSE	NIC2	TRUE	276	10203419	15037759	0.6785199177616824	0	9396713	0.624874557439044	TRUE	0.855784	C	1e-5	1e-5	0.855784	0.144126	1e-5	1e-5	1e-5	1e-5	1e-5	1e-5	1e-5	FALSE
I	1667370	1673170	CX11315	CX11315	0.9	142	21	142	5800	#00CC7C	1920943	FALSE	NIC2	TRUE	276	10203419	15037759	0.6785199177616824	0	9396713	0.624874557439044	TRUE	0.855784	C	1e-5	1e-5	0.855784	0.144126	1e-5	1e-5	1e-5	1e-5	1e-5	1e-5	1e-5	FALSE
I	1673170	1676686	MY920	CX11315	0.9	142	22	12	3516	#FF8566	22692122	FALSE	NIC2	TRUE	276	10203419	15037759	0.6785199177616824	0	9396713	0.624874557439044	TRUE	0.855784	C	1e-5	1e-5	0.855784	0.144126	1e-5	1e-5	1e-5	1e-5	1e-5	1e-5	1e-5	FALSE
I	1676686	1683094	CX11315	CX11315	0.9	142	23	142	6408	#00CC7C	1920943	FALSE	NIC2	TRUE	276	10203419	15037759	0.6785199177616824	0	9396713	0.624874557439044	TRUE	0.855784	C	1e-5	1e-5	0.855784	0.144126	1e-5	1e-5	1e-5	1e-5	1e-5	1e-5	1e-5	FALSE
I	1683094	1691687	NIC527	CX11315	0.9	142	24	118	8593	#00CC21	1031040	FALSE	NIC2	TRUE	276	10203419	15037759	0.6785199177616824	0	9396713	0.624874557439044	TRUE	0.855784	C	1e-5	1e-5	0.855784	0.144126	1e-5	1e-5	1e-5	1e-5	1e-5	1e-5	1e-5	FALSE
I	1691687	1704321	CX11315	CX11315	0.9	142	25	142	12634	#00CC7C	1920943	FALSE	NIC2	TRUE	276	10203419	15037759	0.6785199177616824	0	9396713	0.624874557439044	TRUE	0.855784	C	1e-5	1e-5	0.855784	0.144126	1e-5	1e-5	1e-5	1e-5	1e-5	1e-5	1e-5	FALSE
I	1704321	1712160	ED3048	CX11315	0.9	142	26	4	7839	#CC0B00	150684368	FALSE	NIC2	TRUE	276	10203419	15037759	0.6785199177616824	0	9396713	0.624874557439044	TRUE	0.855784	C	1e-5	1e-5	0.855784	0.144126	1e-5	1e-5	1e-5	1e-5	1e-5	1e-5	1e-5	FALSE
I	1712160	1752731	MY920	CX11315	0.9	142	27	12	40571	#FF8566	22692122	FALSE	NIC2	TRUE	276	10203419	15037759	0.6785199177616824	0	9396713	0.624874557439044	TRUE	0.855784	C	1e-5	1e-5	0.855784	0.144126	1e-5	1e-5	1e-5	1e-5	1e-5	1e-5	1e-5	FALSE
I	1752731	1755383	NIC2	CX11315	1	142	28	1	2652	#CC0000	2453905988	TRUE	NIC2	TRUE	276	10203419	15037759	0.6785199177616824	0	9396713	0.624874557439044	TRUE	0.855784	C	1e-5	1e-5	0.855784	0.144126	1e-5	1e-5	1e-5	1e-5	1e-5	1e-5	1e-5	FALSE
I	1755383	1791536	MY920	CX11315	0.9	142	29	12	36153	#FF8566	22692122	FALSE	NIC2	TRUE	276	10203419	15037759	0.6785199177616824	0	9396713	0.624874557439044	TRUE	0.855784	C	1e-5	1e-5	0.855784	0.144126	1e-5	1e-5	1e-5	1e-5	1e-5	1e-5	1e-5	FALSE
I	1791536	1842842	NIC242	CX11315	0.9	142	30	40	51306	#CC9300	23039935	FALSE	NIC2	TRUE	276	10203419	15037759	0.6785199177616824	0	9396713	0.624874557439044	TRUE	0.855784	C	1e-5	1e-5	0.855784	0.144126	1e-5	1e-5	1e-5	1e-5	1e-5	1e-5	1e-5	FALSE
I	1842842	1845052	NIC275	CX11315	1	142	31	27	2210	#FFB066	13184509	FALSE	NIC2	TRUE	276	10203419	15037759	0.6785199177616824	0	9396713	0.624874557439044	TRUE	0.855784	C	1e-5	1e-5	0.855784	0.144126	1e-5	1e-5	1e-5	1e-5	1e-5	1e-5	1e-5	FALSE
I	1845052	1851727	NIC242	CX11315	0.9	142	32	40	6675	#CC9300	23039935	FALSE	NIC2	TRUE	276	10203419	15037759	0.6785199177616824	0	9396713	0.624874557439044	TRUE	0.855784	C	1e-5	1e-5	0.855784	0.144126	1e-5	1e-5	1e-5	1e-5	1e-5	1e-5	1e-5	FALSE
I	1851727	1874368	MY920	CX11315	0.9	142	33	12	22641	#FF8566	22692122	FALSE	NIC2	TRUE	276	10203419	15037759	0.6785199177616824	0	9396713	0.624874557439044	TRUE	0.855784	C	1e-5	1e-5	0.855784	0.144126	1e-5	1e-5	1e-5	1e-5	1e-5	1e-5	1e-5	FALSE
I	1874368	1882103	NIC277	CX11315	1	142	34	39	7735	#FFD166	16231262	FALSE	NIC2	TRUE	276	10203419	15037759	0.6785199177616824	0	9396713	0.624874557439044	TRUE	0.855784	C	1e-5	1e-5	0.855784	0.144126	1e-5	1e-5	1e-5	1e-5	1e-5	1e-5	1e-5	FALSE
I	1882103	1988317	NIC2	CX11315	1	142	35	1	106214	#CC0000	2453905988	TRUE	NIC2	TRUE	276	10203419	15037759	0.6785199177616824	0	9396713	0.624874557439044	TRUE	0.855784	C	1e-5	1e-5	0.855784	0.144126	1e-5	1e-5	1e-5	1e-5	1e-5	1e-5	1e-5	FALSE
I	1988317	1988890	NIC277	CX11315	1	142	36	39	573	#FFD166	16231262	FALSE	NIC2	TRUE	276	10203419	15037759	0.6785199177616824	0	9396713	0.624874557439044	TRUE	0.855784	C	1e-5	1e-5	0.855784	0.144126	1e-5	1e-5	1e-5	1e-5	1e-5	1e-5	1e-5	FALSE
I	1988890	2007906	NIC2	CX11315	1	142	37	1	19016	#CC0000	2453905988	TRUE	NIC2	TRUE	276	10203419	15037759	0.6785199177616824	0	9396713	0.624874557439044	TRUE	0.855784	C	1e-5	1e-5	0.855784	0.144126	1e-5	1e-5	1e-5	1e-5	1e-5	1e-5	1e-5	FALSE
I	2007906	2183457	NIC242	CX11315	0.9	142	38	40	175551	#CC9300	23039935	FALSE	NIC2	TRUE	276	10203419	15037759	0.6785199177616824	0	9396713	0.624874557439044	TRUE	0.855784	C	1e-5	1e-5	0.855784	0.144126	1e-5	1e-5	1e-5	1e-5	1e-5	1e-5	1e-5	FALSE
I	2183457	2183628	NIC275	CX11315	1	142	39	27	171	#FFB066	13184509	FALSE	NIC2	TRUE	276	10203419	15037759	0.6785199177616824	0	9396713	0.624874557439044	TRUE	0.855784	C	1e-5	1e-5	0.855784	0.144126	1e-5	1e-5	1e-5	1e-5	1e-5	1e-5	1e-5	FALSE
I	2183628	2189422	MY920	CX11315	0.9	142	40	12	5794	#FF8566	22692122	FALSE	NIC2	TRUE	276	10203419	15037759	0.6785199177616824	0	9396713	0.624874557439044	TRUE	0.855784	C	1e-5	1e-5	0.855784	0.144126	1e-5	1e-5	1e-5	1e-5	1e-5	1e-5	1e-5	FALSE
I	2189422	2190339	ED3048	CX11315	0.9	142	41	4	917	#CC0B00	150684368	FALSE	NIC2	TRUE	276	10203419	15037759	0.6785199177616824	0	9396713	0.624874557439044	TRUE	0.855784	C	1e-5	1e-5	0.855784	0.144126	1e-5	1e-5	1e-5	1e-5	1e-5	1e-5	1e-5	FALSE
I	2190339	2191480	NIC2	CX11315	1	142	42	1	1141	#CC0000	2453905988	TRUE	NIC2	TRUE	276	10203419	15037759	0.6785199177616824	0	9396713	0.624874557439044	TRUE	0.855784	C	1e-5	1e-5	0.855784	0.144126	1e-5	1e-5	1e-5	1e-5	1e-5	1e-5	1e-5	FALSE
I	2191480	2199931	NIC242	CX11315	0.9	142	43	40	8451	#CC9300	23039935	FALSE	NIC2	TRUE	276	10203419	15037759	0.6785199177616824	0	9396713	0.624874557439044	TRUE	0.855784	C	1e-5	1e-5	0.855784	0.144126	1e-5	1e-5	1e-5	1e-5	1e-5	1e-5	1e-5	FALSE
I	2199931	2204010	NIC2	CX11315	1	142	44	1	4079	#CC0000	2453905988	TRUE	NIC2	TRUE	276	10203419	15037759	0.6785199177616824	0	9396713	0.624874557439044	TRUE	0.855784	C	1e-5	1e-5	0.855784	0.144126	1e-5	1e-5	1e-5	1e-5	1e-5	1e-5	1e-5	FALSE
I	2204010	2264755	ED3048	CX11315	0.9	142	45	4	60745	#CC0B00	150684368	FALSE	NIC2	TRUE	276	10203419	15037759	0.6785199177616824	0	9396713	0.624874557439044	TRUE	0.855784	C	1e-5	1e-5	0.855784	0.144126	1e-5	1e-5	1e-5	1e-5	1e-5	1e-5	1e-5	FALSE
I	2264755	2276554	NIC242	CX11315	0.9	142	46	40	11799	#CC9300	23039935	FALSE	NIC2	TRUE	276	10203419	15037759	0.6785199177616824	0	9396713	0.624874557439044	TRUE	0.855784	C	1e-5	1e-5	0.855784	0.144126	1e-5	1e-5	1e-5	1e-5	1e-5	1e-5	1e-5	FALSE
I	2276554	2286306	NIC275	CX11315	1	142	47	27	9752	#FFB066	13184509	FALSE	NIC2	TRUE	276	10203419	15037759	0.6785199177616824	0	9396713	0.624874557439044	TRUE	0.855784	C	1e-5	1e-5	0.855784	0.144126	1e-5	1e-5	1e-5	1e-5	1e-5	1e-5	1e-5	FALSE
I	2286306	2373196	NIC242	CX11315	0.9	142	48	40	86890	#CC9300	23039935	FALSE	NIC2	TRUE	276	10203419	15037759	0.6785199177616824	0	9396713	0.624874557439044	TRUE	0.855784	C	1e-5	1e-5	0.855784	0.144126	1e-5	1e-5	1e-5	1e-5	1e-5	1e-5	1e-5	FALSE
I	2373196	2376213	MY920	CX11315	0.9	142	49	12	3017	#FF8566	22692122	FALSE	NIC2	TRUE	276	10203419	15037759	0.6785199177616824	0	9396713	0.624874557439044	TRUE	0.855784	C	1e-5	1e-5	0.855784	0.144126	1e-5	1e-5	1e-5	1e-5	1e-5	1e-5	1e-5	FALSE
I	2376213	2397107	NIC242	CX11315	0.9	142	50	40	20894	#CC9300	23039935	FALSE	NIC2	TRUE	276	10203419	15037759	0.6785199177616824	0	9396713	0.624874557439044	TRUE	0.855784	C	1e-5	1e-5	0.855784	0.144126	1e-5	1e-5	1e-5	1e-5	1e-5	1e-5	1e-5	FALSE
I	2397107	2414171	ED3048	CX11315	0.9	142	51	4	17064	#CC0B00	150684368	FALSE	NIC2	TRUE	276	10203419	15037759	0.6785199177616824	0	9396713	0.624874557439044	TRUE	0.855784	C	1e-5	1e-5	0.855784	0.144126	1e-5	1e-5	1e-5	1e-5	1e-5	1e-5	1e-5	FALSE
I	2414171	2500168	NIC242	CX11315	0.9	142	52	40	85997	#CC9300	23039935	FALSE	NIC2	TRUE	276	10203419	15037759	0.6785199177616824	0	9396713	0.624874557439044	TRUE	0.855784	C	1e-5	1e-5	0.855784	0.144126	1e-5	1e-5	1e-5	1e-5	1e-5	1e-5	1e-5	FALSE
I	2500168	2523118	NIC2	CX11315	1	142	53	1	22950	#CC0000	2453905988	TRUE	NIC2	TRUE	276	10203419	15037759	0.6785199177616824	0	9396713	0.624874557439044	TRUE	0.855784	C	1e-5	1e-5	0.855784	0.144126	1e-5	1e-5	1e-5	1e-5	1e-5	1e-5	1e-5	FALSE
I	2523118	2678904	NIC242	CX11315	0.9	142	54	40	155786	#CC9300	23039935	FALSE	NIC2	TRUE	276	10203419	15037759	0.6785199177616824	0	9396713	0.624874557439044	TRUE	0.855784	C	1e-5	1e-5	0.855784	0.144126	1e-5	1e-5	1e-5	1e-5	1e-5	1e-5	1e-5	FALSE
I	2678904	2699854	NIC2	CX11315	1	142	55	1	20950	#CC0000	2453905988	TRUE	NIC2	TRUE	276	10203419	15037759	0.6785199177616824	0	9396713	0.624874557439044	TRUE	0.855784	C	1e-5	1e-5	0.855784	0.144126	1e-5	1e-5	1e-5	1e-5	1e-5	1e-5	1e-5	FALSE
I	2699854	2713783	JU1440	CX11315	0.9	142	56	36	13929	#FFC966	16449770	FALSE	NIC2	TRUE	276	10203419	15037759	0.6785199177616824	0	9396713	0.624874557439044	TRUE	0.855784	C	1e-5	1e-5	0.855784	0.144126	1e-5	1e-5	1e-5	1e-5	1e-5	1e-5	1e-5	FALSE
I	2713783	2771201	NIC2	CX11315	1	142	57	1	57418	#CC0000	2453905988	TRUE	NIC2	TRUE	276	10203419	15037759	0.6785199177616824	0	9396713	0.624874557439044	TRUE	0.855784	C	1e-5	1e-5	0.855784	0.144126	1e-5	1e-5	1e-5	1e-5	1e-5	1e-5	1e-5	FALSE
I	2771201	2791129	JU1440	CX11315	0.9	142	58	36	19928	#FFC966	16449770	FALSE	NIC2	TRUE	276	10203419	15037759	0.6785199177616824	0	9396713	0.624874557439044	TRUE	0.855784	C	1e-5	1e-5	0.855784	0.144126	1e-5	1e-5	1e-5	1e-5	1e-5	1e-5	1e-5	FALSE
I	2791129	2796600	ED3048	CX11315	0.9	142	59	4	5471	#CC0B00	150684368	FALSE	NIC2	TRUE	276	10203419	15037759	0.6785199177616824	0	9396713	0.624874557439044	TRUE	0.855784	C	1e-5	1e-5	0.855784	0.144126	1e-5	1e-5	1e-5	1e-5	1e-5	1e-5	1e-5	FALSE
I	2796600	2820998	JU1440	CX11315	0.9	142	60	36	24398	#FFC966	16449770	FALSE	NIC2	TRUE	276	10203419	15037759	0.6785199177616824	0	9396713	0.624874557439044	TRUE	0.855784	C	1e-5	1e-5	0.855784	0.144126	1e-5	1e-5	1e-5	1e-5	1e-5	1e-5	1e-5	FALSE
I	2820998	2825094	NIC2	CX11315	1	142	61	1	4096	#CC0000	2453905988	TRUE	NIC2	TRUE	276	10203419	15037759	0.6785199177616824	0	9396713	0.624874557439044	TRUE	0.855784	C	1e-5	1e-5	0.855784	0.144126	1e-5	1e-5	1e-5	1e-5	1e-5	1e-5	1e-5	FALSE
I	2825094	2867803	JU1440	CX11315	0.9	142	62	36	42709	#FFC966	16449770	FALSE	NIC2	TRUE	276	10203419	15037759	0.6785199177616824	0	9396713	0.624874557439044	TRUE	0.855784	C	1e-5	1e-5	0.855784	0.144126	1e-5	1e-5	1e-5	1e-5	1e-5	1e-5	1e-5	FALSE
I	2867803	2879602	JU310	CX11315	0.9	142	63	32	11799	#FF9200	14764190	FALSE	NIC2	TRUE	276	10203419	15037759	0.6785199177616824	0	9396713	0.624874557439044	TRUE	0.855784	C	1e-5	1e-5	0.855784	0.144126	1e-5	1e-5	1e-5	1e-5	1e-5	1e-5	1e-5	FALSE
I	2879602	2896651	NIC2	CX11315	1	142	64	1	17049	#CC0000	2453905988	TRUE	NIC2	TRUE	276	10203419	15037759	0.6785199177616824	0	9396713	0.624874557439044	TRUE	0.855784	C	1e-5	1e-5	0.855784	0.144126	1e-5	1e-5	1e-5	1e-5	1e-5	1e-5	1e-5	FALSE
I	2896651	2899495	JU310	CX11315	0.9	142	65	32	2844	#FF9200	14764190	FALSE	NIC2	TRUE	276	10203419	15037759	0.6785199177616824	0	9396713	0.624874557439044	TRUE	0.855784	C	1e-5	1e-5	0.855784	0.144126	1e-5	1e-5	1e-5	1e-5	1e-5	1e-5	1e-5	FALSE
I	2899495	2920350	NIC2	CX11315	1	142	66	1	20855	#CC0000	2453905988	TRUE	NIC2	TRUE	276	10203419	15037759	0.6785199177616824	0	9396713	0.624874557439044	TRUE	0.855784	C	1e-5	1e-5	0.855784	0.144126	1e-5	1e-5	1e-5	1e-5	1e-5	1e-5	1e-5	FALSE
I	2920350	2946532	JU1440	CX11315	0.9	142	67	36	26182	#FFC966	16449770	FALSE	NIC2	TRUE	276	10203419	15037759	0.6785199177616824	0	9396713	0.624874557439044	TRUE	0.855784	C	1e-5	1e-5	0.855784	0.144126	1e-5	1e-5	1e-5	1e-5	1e-5	1e-5	1e-5	FALSE
I	2946532	2946880	JU2907	CX11315	1	142	68	21	348	#FF9F66	1007348	FALSE	NIC2	TRUE	276	10203419	15037759	0.6785199177616824	0	9396713	0.624874557439044	TRUE	0.855784	C	1e-5	1e-5	0.855784	0.144126	1e-5	1e-5	1e-5	1e-5	1e-5	1e-5	1e-5	FALSE
I	2946880	2972791	JU1440	CX11315	0.9	142	69	36	25911	#FFC966	16449770	FALSE	NIC2	TRUE	276	10203419	15037759	0.6785199177616824	0	9396713	0.624874557439044	TRUE	0.855784	C	1e-5	1e-5	0.855784	0.144126	1e-5	1e-5	1e-5	1e-5	1e-5	1e-5	1e-5	FALSE
I	2972791	2972966	JU2907	CX11315	1	142	70	21	175	#FF9F66	1007348	FALSE	NIC2	TRUE	276	10203419	15037759	0.6785199177616824	0	9396713	0.624874557439044	TRUE	0.855784	C	1e-5	1e-5	0.855784	0.144126	1e-5	1e-5	1e-5	1e-5	1e-5	1e-5	1e-5	FALSE
I	2972966	9946989	NIC2	CX11315	1	142	71	1	6974023	#CC0000	2453905988	TRUE	NIC2	TRUE	276	10203419	15037759	0.6785199177616824	6974023	9396713	0.624874557439044	TRUE	0.855784	C	1e-5	1e-5	0.855784	0.144126	1e-5	1e-5	1e-5	1e-5	1e-5	1e-5	1e-5	FALSE
I	9946989	10351020	EG4347	CX11315	1	142	72	5	404031	#FF1300	122541644	FALSE	NIC2	TRUE	276	10203419	15037759	0.6785199177616824	0	9396713	0.624874557439044	TRUE	0.855784	C	1e-5	1e-5	0.855784	0.144126	1e-5	1e-5	1e-5	1e-5	1e-5	1e-5	1e-5	FALSE
I	10351020	10354853	NIC2	CX11315	1	142	73	1	3833	#CC0000	2453905988	TRUE	NIC2	TRUE	276	10203419	15037759	0.6785199177616824	0	9396713	0.624874557439044	TRUE	0.855784	C	1e-5	1e-5	0.855784	0.144126	1e-5	1e-5	1e-5	1e-5	1e-5	1e-5	1e-5	FALSE
I	10354853	10634911	EG4347	CX11315	1	142	74	5	280058	#FF1300	122541644	FALSE	NIC2	TRUE	276	10203419	15037759	0.6785199177616824	0	9396713	0.624874557439044	TRUE	0.855784	C	1e-5	1e-5	0.855784	0.144126	1e-5	1e-5	1e-5	1e-5	1e-5	1e-5	1e-5	FALSE
I	10634911	10639190	NIC2	CX11315	1	142	75	1	4279	#CC0000	2453905988	TRUE	NIC2	TRUE	276	10203419	15037759	0.6785199177616824	0	9396713	0.624874557439044	TRUE	0.855784	C	1e-5	1e-5	0.855784	0.144126	1e-5	1e-5	1e-5	1e-5	1e-5	1e-5	1e-5	FALSE
I	10639190	10883065	EG4347	CX11315	1	142	76	5	243875	#FF1300	122541644	FALSE	NIC2	TRUE	276	10203419	15037759	0.6785199177616824	0	9396713	0.624874557439044	TRUE	0.855784	C	1e-5	1e-5	0.855784	0.144126	1e-5	1e-5	1e-5	1e-5	1e-5	1e-5	1e-5	FALSE
I	10883065	10908578	NIC2	CX11315	1	142	77	1	25513	#CC0000	2453905988	TRUE	NIC2	TRUE	276	10203419	15037759	0.6785199177616824	0	9396713	0.624874557439044	TRUE	0.855784	C	1e-5	1e-5	0.855784	0.144126	1e-5	1e-5	1e-5	1e-5	1e-5	1e-5	1e-5	FALSE
I	10908578	11396234	EG4347	CX11315	1	142	78	5	487656	#FF1300	122541644	FALSE	NIC2	TRUE	276	10203419	15037759	0.6785199177616824	0	9396713	0.624874557439044	TRUE	0.855784	C	1e-5	1e-5	0.855784	0.144126	1e-5	1e-5	1e-5	1e-5	1e-5	1e-5	1e-5	FALSE
I	11396234	11460051	NIC2	CX11315	1	142	79	1	63817	#CC0000	2453905988	TRUE	NIC2	TRUE	276	10203419	15037759	0.6785199177616824	0	9396713	0.624874557439044	TRUE	0.855784	C	1e-5	1e-5	0.855784	0.144126	1e-5	1e-5	1e-5	1e-5	1e-5	1e-5	1e-5	FALSE
I	11460051	11503320	EG4347	CX11315	1	142	80	5	43269	#FF1300	122541644	FALSE	NIC2	TRUE	276	10203419	15037759	0.6785199177616824	0	9396713	0.624874557439044	TRUE	0.855784	C	1e-5	1e-5	0.855784	0.144126	1e-5	1e-5	1e-5	1e-5	1e-5	1e-5	1e-5	FALSE
I	11503320	11551724	NIC2	CX11315	1	142	81	1	48404	#CC0000	2453905988	TRUE	NIC2	TRUE	276	10203419	15037759	0.6785199177616824	0	9396713	0.624874557439044	TRUE	0.855784	C	1e-5	1e-5	0.855784	0.144126	1e-5	1e-5	1e-5	1e-5	1e-5	1e-5	1e-5	FALSE
I	11551724	12236997	EG4347	CX11315	1	142	82	5	685273	#FF1300	122541644	FALSE	NIC2	TRUE	276	10203419	15037759	0.6785199177616824	0	9396713	0.624874557439044	TRUE	0.855784	C	1e-5	1e-5	0.855784	0.144126	1e-5	1e-5	1e-5	1e-5	1e-5	1e-5	1e-5	FALSE
I	12236997	12435701	NIC2	CX11315	1	142	83	1	198704	#CC0000	2453905988	TRUE	NIC2	TRUE	276	10203419	15037759	0.6785199177616824	0	9396713	0.624874557439044	TRUE	0.855784	C	1e-5	1e-5	0.855784	0.144126	1e-5	1e-5	1e-5	1e-5	1e-5	1e-5	1e-5	FALSE
I	12435701	12618732	EG4347	CX11315	1	142	84	5	183031	#FF1300	122541644	FALSE	NIC2	TRUE	276	10203419	15037759	0.6785199177616824	0	9396713	0.624874557439044	TRUE	0.855784	C	1e-5	1e-5	0.855784	0.144126	1e-5	1e-5	1e-5	1e-5	1e-5	1e-5	1e-5	FALSE
I	12618732	15041422	NIC2	CX11315	1	142	85	1	2422690	#CC0000	2453905988	TRUE	NIC2	TRUE	276	10203419	15037759	0.6785199177616824	2422690	9396713	0.624874557439044	TRUE	0.855784	C	1e-5	1e-5	0.855784	0.144126	1e-5	1e-5	1e-5	1e-5	1e-5	1e-5	1e-5	FALSE
I	3663	881269	ED3048	DL200	0.9	120	1	4	877606	#CC0B00	150684368	FALSE	NIC2	TRUE	276	11792258	15037759	0.7841765518386083	0	10971178	0.7295753310051052	TRUE	0.736236	I	1e-5	1e-5	1e-5	0.174635	1e-5	1e-5	1e-5	1e-5	0.736236	0.026985	0.062074	FALSE
I	881269	902069	NIC2	DL200	1	120	2	1	20800	#CC0000	2453905988	TRUE	NIC2	TRUE	276	11792258	15037759	0.7841765518386083	0	10971178	0.7295753310051052	TRUE	0.736236	I	1e-5	1e-5	1e-5	0.174635	1e-5	1e-5	1e-5	1e-5	0.736236	0.026985	0.062074	FALSE
I	902069	1024873	ED3048	DL200	0.9	120	3	4	122804	#CC0B00	150684368	FALSE	NIC2	TRUE	276	11792258	15037759	0.7841765518386083	0	10971178	0.7295753310051052	TRUE	0.736236	I	1e-5	1e-5	1e-5	0.174635	1e-5	1e-5	1e-5	1e-5	0.736236	0.026985	0.062074	FALSE
I	1024873	1050613	NIC2	DL200	1	120	4	1	25740	#CC0000	2453905988	TRUE	NIC2	TRUE	276	11792258	15037759	0.7841765518386083	0	10971178	0.7295753310051052	TRUE	0.736236	I	1e-5	1e-5	1e-5	0.174635	1e-5	1e-5	1e-5	1e-5	0.736236	0.026985	0.062074	FALSE
I	1050613	1091061	ED3048	DL200	0.9	120	5	4	40448	#CC0B00	150684368	FALSE	NIC2	TRUE	276	11792258	15037759	0.7841765518386083	0	10971178	0.7295753310051052	TRUE	0.736236	I	1e-5	1e-5	1e-5	0.174635	1e-5	1e-5	1e-5	1e-5	0.736236	0.026985	0.062074	FALSE
I	1091061	1112176	NIC2	DL200	1	120	6	1	21115	#CC0000	2453905988	TRUE	NIC2	TRUE	276	11792258	15037759	0.7841765518386083	0	10971178	0.7295753310051052	TRUE	0.736236	I	1e-5	1e-5	1e-5	0.174635	1e-5	1e-5	1e-5	1e-5	0.736236	0.026985	0.062074	FALSE
I	1112176	1190482	ED3048	DL200	0.9	120	7	4	78306	#CC0B00	150684368	FALSE	NIC2	TRUE	276	11792258	15037759	0.7841765518386083	0	10971178	0.7295753310051052	TRUE	0.736236	I	1e-5	1e-5	1e-5	0.174635	1e-5	1e-5	1e-5	1e-5	0.736236	0.026985	0.062074	FALSE
I	1190482	1242553	NIC2	DL200	1	120	8	1	52071	#CC0000	2453905988	TRUE	NIC2	TRUE	276	11792258	15037759	0.7841765518386083	0	10971178	0.7295753310051052	TRUE	0.736236	I	1e-5	1e-5	1e-5	0.174635	1e-5	1e-5	1e-5	1e-5	0.736236	0.026985	0.062074	FALSE
I	1242553	1344494	ED3048	DL200	0.9	120	9	4	101941	#CC0B00	150684368	FALSE	NIC2	TRUE	276	11792258	15037759	0.7841765518386083	0	10971178	0.7295753310051052	TRUE	0.736236	I	1e-5	1e-5	1e-5	0.174635	1e-5	1e-5	1e-5	1e-5	0.736236	0.026985	0.062074	FALSE
I	1344494	1420764	NIC2	DL200	1	120	10	1	76270	#CC0000	2453905988	TRUE	NIC2	TRUE	276	11792258	15037759	0.7841765518386083	0	10971178	0.7295753310051052	TRUE	0.736236	I	1e-5	1e-5	1e-5	0.174635	1e-5	1e-5	1e-5	1e-5	0.736236	0.026985	0.062074	FALSE
I	1420764	1443616	ED3048	DL200	0.9	120	11	4	22852	#CC0B00	150684368	FALSE	NIC2	TRUE	276	11792258	15037759	0.7841765518386083	0	10971178	0.7295753310051052	TRUE	0.736236	I	1e-5	1e-5	1e-5	0.174635	1e-5	1e-5	1e-5	1e-5	0.736236	0.026985	0.062074	FALSE
I	1443616	1454609	QG536	DL200	1	120	12	7	10993	#CC1700	59985814	FALSE	NIC2	TRUE	276	11792258	15037759	0.7841765518386083	0	10971178	0.7295753310051052	TRUE	0.736236	I	1e-5	1e-5	1e-5	0.174635	1e-5	1e-5	1e-5	1e-5	0.736236	0.026985	0.062074	FALSE
I	1454609	1463349	NIC2	DL200	1	120	13	1	8740	#CC0000	2453905988	TRUE	NIC2	TRUE	276	11792258	15037759	0.7841765518386083	0	10971178	0.7295753310051052	TRUE	0.736236	I	1e-5	1e-5	1e-5	0.174635	1e-5	1e-5	1e-5	1e-5	0.736236	0.026985	0.062074	FALSE
I	1463349	1486678	QG536	DL200	1	120	14	7	23329	#CC1700	59985814	FALSE	NIC2	TRUE	276	11792258	15037759	0.7841765518386083	0	10971178	0.7295753310051052	TRUE	0.736236	I	1e-5	1e-5	1e-5	0.174635	1e-5	1e-5	1e-5	1e-5	0.736236	0.026985	0.062074	FALSE
I	1486678	1610423	NIC2	DL200	1	120	15	1	123745	#CC0000	2453905988	TRUE	NIC2	TRUE	276	11792258	15037759	0.7841765518386083	0	10971178	0.7295753310051052	TRUE	0.736236	I	1e-5	1e-5	1e-5	0.174635	1e-5	1e-5	1e-5	1e-5	0.736236	0.026985	0.062074	FALSE
I	1610423	1640212	ED3048	DL200	0.9	120	16	4	29789	#CC0B00	150684368	FALSE	NIC2	TRUE	276	11792258	15037759	0.7841765518386083	0	10971178	0.7295753310051052	TRUE	0.736236	I	1e-5	1e-5	1e-5	0.174635	1e-5	1e-5	1e-5	1e-5	0.736236	0.026985	0.062074	FALSE
I	1640212	1660874	NIC2	DL200	1	120	17	1	20662	#CC0000	2453905988	TRUE	NIC2	TRUE	276	11792258	15037759	0.7841765518386083	0	10971178	0.7295753310051052	TRUE	0.736236	I	1e-5	1e-5	1e-5	0.174635	1e-5	1e-5	1e-5	1e-5	0.736236	0.026985	0.062074	FALSE
I	1660874	1664148	ED3048	DL200	0.9	120	18	4	3274	#CC0B00	150684368	FALSE	NIC2	TRUE	276	11792258	15037759	0.7841765518386083	0	10971178	0.7295753310051052	TRUE	0.736236	I	1e-5	1e-5	1e-5	0.174635	1e-5	1e-5	1e-5	1e-5	0.736236	0.026985	0.062074	FALSE
I	1664148	1704321	MY920	DL200	0.9	120	19	12	40173	#FF8566	22692122	FALSE	NIC2	TRUE	276	11792258	15037759	0.7841765518386083	0	10971178	0.7295753310051052	TRUE	0.736236	I	1e-5	1e-5	1e-5	0.174635	1e-5	1e-5	1e-5	1e-5	0.736236	0.026985	0.062074	FALSE
I	1704321	1712160	ED3048	DL200	0.9	120	20	4	7839	#CC0B00	150684368	FALSE	NIC2	TRUE	276	11792258	15037759	0.7841765518386083	0	10971178	0.7295753310051052	TRUE	0.736236	I	1e-5	1e-5	1e-5	0.174635	1e-5	1e-5	1e-5	1e-5	0.736236	0.026985	0.062074	FALSE
I	1712160	1752731	MY920	DL200	0.9	120	21	12	40571	#FF8566	22692122	FALSE	NIC2	TRUE	276	11792258	15037759	0.7841765518386083	0	10971178	0.7295753310051052	TRUE	0.736236	I	1e-5	1e-5	1e-5	0.174635	1e-5	1e-5	1e-5	1e-5	0.736236	0.026985	0.062074	FALSE
I	1752731	1755383	NIC2	DL200	1	120	22	1	2652	#CC0000	2453905988	TRUE	NIC2	TRUE	276	11792258	15037759	0.7841765518386083	0	10971178	0.7295753310051052	TRUE	0.736236	I	1e-5	1e-5	1e-5	0.174635	1e-5	1e-5	1e-5	1e-5	0.736236	0.026985	0.062074	FALSE
I	1755383	1791536	MY920	DL200	0.9	120	23	12	36153	#FF8566	22692122	FALSE	NIC2	TRUE	276	11792258	15037759	0.7841765518386083	0	10971178	0.7295753310051052	TRUE	0.736236	I	1e-5	1e-5	1e-5	0.174635	1e-5	1e-5	1e-5	1e-5	0.736236	0.026985	0.062074	FALSE
I	1791536	1842842	NIC242	DL200	0.9	120	24	40	51306	#CC9300	23039935	FALSE	NIC2	TRUE	276	11792258	15037759	0.7841765518386083	0	10971178	0.7295753310051052	TRUE	0.736236	I	1e-5	1e-5	1e-5	0.174635	1e-5	1e-5	1e-5	1e-5	0.736236	0.026985	0.062074	FALSE
I	1842842	1845052	NIC275	DL200	1	120	25	27	2210	#FFB066	13184509	FALSE	NIC2	TRUE	276	11792258	15037759	0.7841765518386083	0	10971178	0.7295753310051052	TRUE	0.736236	I	1e-5	1e-5	1e-5	0.174635	1e-5	1e-5	1e-5	1e-5	0.736236	0.026985	0.062074	FALSE
I	1845052	1851727	NIC242	DL200	0.9	120	26	40	6675	#CC9300	23039935	FALSE	NIC2	TRUE	276	11792258	15037759	0.7841765518386083	0	10971178	0.7295753310051052	TRUE	0.736236	I	1e-5	1e-5	1e-5	0.174635	1e-5	1e-5	1e-5	1e-5	0.736236	0.026985	0.062074	FALSE
I	1851727	1874368	MY920	DL200	0.9	120	27	12	22641	#FF8566	22692122	FALSE	NIC2	TRUE	276	11792258	15037759	0.7841765518386083	0	10971178	0.7295753310051052	TRUE	0.736236	I	1e-5	1e-5	1e-5	0.174635	1e-5	1e-5	1e-5	1e-5	0.736236	0.026985	0.062074	FALSE
I	1874368	1882103	NIC277	DL200	1	120	28	39	7735	#FFD166	16231262	FALSE	NIC2	TRUE	276	11792258	15037759	0.7841765518386083	0	10971178	0.7295753310051052	TRUE	0.736236	I	1e-5	1e-5	1e-5	0.174635	1e-5	1e-5	1e-5	1e-5	0.736236	0.026985	0.062074	FALSE
I	1882103	1988317	NIC2	DL200	1	120	29	1	106214	#CC0000	2453905988	TRUE	NIC2	TRUE	276	11792258	15037759	0.7841765518386083	0	10971178	0.7295753310051052	TRUE	0.736236	I	1e-5	1e-5	1e-5	0.174635	1e-5	1e-5	1e-5	1e-5	0.736236	0.026985	0.062074	FALSE
I	1988317	1988890	NIC277	DL200	1	120	30	39	573	#FFD166	16231262	FALSE	NIC2	TRUE	276	11792258	15037759	0.7841765518386083	0	10971178	0.7295753310051052	TRUE	0.736236	I	1e-5	1e-5	1e-5	0.174635	1e-5	1e-5	1e-5	1e-5	0.736236	0.026985	0.062074	FALSE
I	1988890	2007906	NIC2	DL200	1	120	31	1	19016	#CC0000	2453905988	TRUE	NIC2	TRUE	276	11792258	15037759	0.7841765518386083	0	10971178	0.7295753310051052	TRUE	0.736236	I	1e-5	1e-5	1e-5	0.174635	1e-5	1e-5	1e-5	1e-5	0.736236	0.026985	0.062074	FALSE
I	2007906	2183457	NIC242	DL200	0.9	120	32	40	175551	#CC9300	23039935	FALSE	NIC2	TRUE	276	11792258	15037759	0.7841765518386083	0	10971178	0.7295753310051052	TRUE	0.736236	I	1e-5	1e-5	1e-5	0.174635	1e-5	1e-5	1e-5	1e-5	0.736236	0.026985	0.062074	FALSE
I	2183457	2183628	NIC275	DL200	1	120	33	27	171	#FFB066	13184509	FALSE	NIC2	TRUE	276	11792258	15037759	0.7841765518386083	0	10971178	0.7295753310051052	TRUE	0.736236	I	1e-5	1e-5	1e-5	0.174635	1e-5	1e-5	1e-5	1e-5	0.736236	0.026985	0.062074	FALSE
I	2183628	2189422	MY920	DL200	0.9	120	34	12	5794	#FF8566	22692122	FALSE	NIC2	TRUE	276	11792258	15037759	0.7841765518386083	0	10971178	0.7295753310051052	TRUE	0.736236	I	1e-5	1e-5	1e-5	0.174635	1e-5	1e-5	1e-5	1e-5	0.736236	0.026985	0.062074	FALSE
I	2189422	2190339	ED3048	DL200	0.9	120	35	4	917	#CC0B00	150684368	FALSE	NIC2	TRUE	276	11792258	15037759	0.7841765518386083	0	10971178	0.7295753310051052	TRUE	0.736236	I	1e-5	1e-5	1e-5	0.174635	1e-5	1e-5	1e-5	1e-5	0.736236	0.026985	0.062074	FALSE
I	2190339	2266437	NIC2	DL200	1	120	36	1	76098	#CC0000	2453905988	TRUE	NIC2	TRUE	276	11792258	15037759	0.7841765518386083	0	10971178	0.7295753310051052	TRUE	0.736236	I	1e-5	1e-5	1e-5	0.174635	1e-5	1e-5	1e-5	1e-5	0.736236	0.026985	0.062074	FALSE
I	2266437	2376213	MY920	DL200	0.9	120	37	12	109776	#FF8566	22692122	FALSE	NIC2	TRUE	276	11792258	15037759	0.7841765518386083	0	10971178	0.7295753310051052	TRUE	0.736236	I	1e-5	1e-5	1e-5	0.174635	1e-5	1e-5	1e-5	1e-5	0.736236	0.026985	0.062074	FALSE
I	2376213	2397107	NIC242	DL200	0.9	120	38	40	20894	#CC9300	23039935	FALSE	NIC2	TRUE	276	11792258	15037759	0.7841765518386083	0	10971178	0.7295753310051052	TRUE	0.736236	I	1e-5	1e-5	1e-5	0.174635	1e-5	1e-5	1e-5	1e-5	0.736236	0.026985	0.062074	FALSE
I	2397107	2414171	ED3048	DL200	0.9	120	39	4	17064	#CC0B00	150684368	FALSE	NIC2	TRUE	276	11792258	15037759	0.7841765518386083	0	10971178	0.7295753310051052	TRUE	0.736236	I	1e-5	1e-5	1e-5	0.174635	1e-5	1e-5	1e-5	1e-5	0.736236	0.026985	0.062074	FALSE
I	2414171	2500168	NIC242	DL200	0.9	120	40	40	85997	#CC9300	23039935	FALSE	NIC2	TRUE	276	11792258	15037759	0.7841765518386083	0	10971178	0.7295753310051052	TRUE	0.736236	I	1e-5	1e-5	1e-5	0.174635	1e-5	1e-5	1e-5	1e-5	0.736236	0.026985	0.062074	FALSE
I	2500168	2523118	NIC2	DL200	1	120	41	1	22950	#CC0000	2453905988	TRUE	NIC2	TRUE	276	11792258	15037759	0.7841765518386083	0	10971178	0.7295753310051052	TRUE	0.736236	I	1e-5	1e-5	1e-5	0.174635	1e-5	1e-5	1e-5	1e-5	0.736236	0.026985	0.062074	FALSE
I	2523118	2678904	NIC242	DL200	0.9	120	42	40	155786	#CC9300	23039935	FALSE	NIC2	TRUE	276	11792258	15037759	0.7841765518386083	0	10971178	0.7295753310051052	TRUE	0.736236	I	1e-5	1e-5	1e-5	0.174635	1e-5	1e-5	1e-5	1e-5	0.736236	0.026985	0.062074	FALSE
I	2678904	2699854	NIC2	DL200	1	120	43	1	20950	#CC0000	2453905988	TRUE	NIC2	TRUE	276	11792258	15037759	0.7841765518386083	0	10971178	0.7295753310051052	TRUE	0.736236	I	1e-5	1e-5	1e-5	0.174635	1e-5	1e-5	1e-5	1e-5	0.736236	0.026985	0.062074	FALSE
I	2699854	2713783	JU1440	DL200	0.9	120	44	36	13929	#FFC966	16449770	FALSE	NIC2	TRUE	276	11792258	15037759	0.7841765518386083	0	10971178	0.7295753310051052	TRUE	0.736236	I	1e-5	1e-5	1e-5	0.174635	1e-5	1e-5	1e-5	1e-5	0.736236	0.026985	0.062074	FALSE
I	2713783	2771201	NIC2	DL200	1	120	45	1	57418	#CC0000	2453905988	TRUE	NIC2	TRUE	276	11792258	15037759	0.7841765518386083	0	10971178	0.7295753310051052	TRUE	0.736236	I	1e-5	1e-5	1e-5	0.174635	1e-5	1e-5	1e-5	1e-5	0.736236	0.026985	0.062074	FALSE
I	2771201	2791129	JU1440	DL200	0.9	120	46	36	19928	#FFC966	16449770	FALSE	NIC2	TRUE	276	11792258	15037759	0.7841765518386083	0	10971178	0.7295753310051052	TRUE	0.736236	I	1e-5	1e-5	1e-5	0.174635	1e-5	1e-5	1e-5	1e-5	0.736236	0.026985	0.062074	FALSE
I	2791129	2796600	ED3048	DL200	0.9	120	47	4	5471	#CC0B00	150684368	FALSE	NIC2	TRUE	276	11792258	15037759	0.7841765518386083	0	10971178	0.7295753310051052	TRUE	0.736236	I	1e-5	1e-5	1e-5	0.174635	1e-5	1e-5	1e-5	1e-5	0.736236	0.026985	0.062074	FALSE
I	2796600	2820998	JU1440	DL200	0.9	120	48	36	24398	#FFC966	16449770	FALSE	NIC2	TRUE	276	11792258	15037759	0.7841765518386083	0	10971178	0.7295753310051052	TRUE	0.736236	I	1e-5	1e-5	1e-5	0.174635	1e-5	1e-5	1e-5	1e-5	0.736236	0.026985	0.062074	FALSE
I	2820998	2825094	NIC2	DL200	1	120	49	1	4096	#CC0000	2453905988	TRUE	NIC2	TRUE	276	11792258	15037759	0.7841765518386083	0	10971178	0.7295753310051052	TRUE	0.736236	I	1e-5	1e-5	1e-5	0.174635	1e-5	1e-5	1e-5	1e-5	0.736236	0.026985	0.062074	FALSE
I	2825094	2867803	JU1440	DL200	0.9	120	50	36	42709	#FFC966	16449770	FALSE	NIC2	TRUE	276	11792258	15037759	0.7841765518386083	0	10971178	0.7295753310051052	TRUE	0.736236	I	1e-5	1e-5	1e-5	0.174635	1e-5	1e-5	1e-5	1e-5	0.736236	0.026985	0.062074	FALSE
I	2867803	2879602	JU310	DL200	0.9	120	51	32	11799	#FF9200	14764190	FALSE	NIC2	TRUE	276	11792258	15037759	0.7841765518386083	0	10971178	0.7295753310051052	TRUE	0.736236	I	1e-5	1e-5	1e-5	0.174635	1e-5	1e-5	1e-5	1e-5	0.736236	0.026985	0.062074	FALSE
I	2879602	2896651	NIC2	DL200	1	120	52	1	17049	#CC0000	2453905988	TRUE	NIC2	TRUE	276	11792258	15037759	0.7841765518386083	0	10971178	0.7295753310051052	TRUE	0.736236	I	1e-5	1e-5	1e-5	0.174635	1e-5	1e-5	1e-5	1e-5	0.736236	0.026985	0.062074	FALSE
I	2896651	2899495	JU310	DL200	0.9	120	53	32	2844	#FF9200	14764190	FALSE	NIC2	TRUE	276	11792258	15037759	0.7841765518386083	0	10971178	0.7295753310051052	TRUE	0.736236	I	1e-5	1e-5	1e-5	0.174635	1e-5	1e-5	1e-5	1e-5	0.736236	0.026985	0.062074	FALSE
I	2899495	2920350	NIC2	DL200	1	120	54	1	20855	#CC0000	2453905988	TRUE	NIC2	TRUE	276	11792258	15037759	0.7841765518386083	0	10971178	0.7295753310051052	TRUE	0.736236	I	1e-5	1e-5	1e-5	0.174635	1e-5	1e-5	1e-5	1e-5	0.736236	0.026985	0.062074	FALSE
I	2920350	2946532	JU1440	DL200	0.9	120	55	36	26182	#FFC966	16449770	FALSE	NIC2	TRUE	276	11792258	15037759	0.7841765518386083	0	10971178	0.7295753310051052	TRUE	0.736236	I	1e-5	1e-5	1e-5	0.174635	1e-5	1e-5	1e-5	1e-5	0.736236	0.026985	0.062074	FALSE
I	2946532	2946880	JU2907	DL200	1	120	56	21	348	#FF9F66	1007348	FALSE	NIC2	TRUE	276	11792258	15037759	0.7841765518386083	0	10971178	0.7295753310051052	TRUE	0.736236	I	1e-5	1e-5	1e-5	0.174635	1e-5	1e-5	1e-5	1e-5	0.736236	0.026985	0.062074	FALSE
[truncated: 147,005 more rows]
