# Supplementary material for: Deep sampling of Hawaiian Caenorhabditis elegans reveals high genetic diversity and admixture with global populations
Source: eLife journal article supplement (doi:10.7554/elife.50465), 2019-12-03
Supplement: supp [file elife-50465-supp-v1.zip › elife_poa_e50465_Figure_7_source_data_2.csv]

isotype	is_swept	pop_assignment	A	B	C	D	E	F	G	H	I	J	K	Hawaiian	genome_swept_hap_length	genome_max_length	genome_frac_swept
CB4853	TRUE	C	1e-5	1e-5	0.692965	0.306945	1e-5	1e-5	1e-5	1e-5	1e-5	1e-5	1e-5	FALSE	61711850	100089639	0.6165658165676869
CB4855	TRUE	C	1e-5	1e-5	0.815787	0.184123	1e-5	1e-5	1e-5	1e-5	1e-5	1e-5	1e-5	FALSE	51460060	100089639	0.5141397302871679
CB4856	FALSE	A	0.9999	1e-5	1e-5	1e-5	1e-5	1e-5	1e-5	1e-5	1e-5	1e-5	1e-5	TRUE	3347671	100089639	0.03344672868687237
CB4857	TRUE	C	1e-5	1e-5	0.999899	1e-5	1e-5	1.1e-5	1e-5	1e-5	1e-5	1e-5	1e-5	FALSE	55517237	100089639	0.5546751647290885
CB4858	TRUE	C	1e-5	1e-5	0.9999	1e-5	1e-5	1e-5	1e-5	1e-5	1e-5	1e-5	1e-5	FALSE	60689498	100089639	0.6063514526213847
CX11254	TRUE	C	1e-5	1e-5	0.656296	1e-5	1e-5	1e-5	1e-5	1e-5	1e-5	0.237537	0.106087	FALSE	46254220	100089639	0.4621279531240991
CX11262	TRUE	C	1e-5	1e-5	0.9999	1e-5	1e-5	1e-5	1e-5	1e-5	1e-5	1e-5	1e-5	FALSE	38381772	100089639	0.3834739777610747
CX11264	TRUE	C	1e-5	1e-5	0.9999	1e-5	1e-5	1e-5	1e-5	1e-5	1e-5	1e-5	1e-5	FALSE	34258305	100089639	0.3422762370039121
CX11276	TRUE	C	1e-5	0.015529	0.591298	0.185454	1e-5	1e-5	1e-5	1e-5	0.009696	0.197963	1e-5	FALSE	58350744	100089639	0.5829848582029554
CX11285	TRUE	C	1.1e-5	1e-5	0.662305	1e-5	1e-5	1e-5	1e-5	1e-5	1e-5	0.337604	1e-5	FALSE	44207713	100089639	0.441681211378932
CX11292	TRUE	C	1e-5	1e-5	0.727048	0.272862	1e-5	1e-5	1e-5	1e-5	1e-5	1e-5	1e-5	FALSE	63494663	100089639	0.6343779799225772
CX11307	TRUE	C	1e-5	1e-5	0.59957	0.183651	1e-5	1e-5	0.038083	1e-5	0.070271	0.057709	0.050666	FALSE	40583755	100089639	0.4054740870830796
CX11314	TRUE	C	1e-5	1e-5	0.9999	1e-5	1e-5	1e-5	1e-5	1e-5	1e-5	1e-5	1e-5	FALSE	48269418	100089639	0.48226188526866404
CX11315	TRUE	C	1e-5	1e-5	0.855784	0.144126	1e-5	1e-5	1e-5	1e-5	1e-5	1e-5	1e-5	FALSE	55969862	100089639	0.5591973610775037
DL226	TRUE	C	1e-5	0.054011	0.722598	0.137152	1e-5	1e-5	1e-5	2e-5	1e-5	0.070261	0.015908	FALSE	52614627	100089639	0.5256750601328475
DL238	FALSE	A	0.999898	1e-5	1e-5	1e-5	1e-5	1e-5	1e-5	1e-5	1.2e-5	1e-5	1e-5	TRUE	2895303	100089639	0.028927100036798013
ECA189	TRUE	E	1e-5	1e-5	0.157606	1e-5	0.842304	1e-5	1e-5	1e-5	1e-5	1e-5	1e-5	TRUE	17389914	100089639	0.17374339815532755
ECA191	FALSE	H	1e-5	1e-5	1e-5	1e-5	1e-5	1e-5	1e-5	0.9999	1e-5	1e-5	1e-5	TRUE	459647	100089639	0.0045923534602817385
ECA347	FALSE	F	1e-5	1e-5	1e-5	1e-5	1e-5	0.9999	1e-5	1e-5	1e-5	1e-5	1e-5	TRUE	115824	100089639	0.0011572026950761607
ECA348	TRUE	C	1e-5	1e-5	0.9999	1e-5	1e-5	1e-5	1e-5	1e-5	1e-5	1e-5	1e-5	FALSE	26624958	100089639	0.26601113028292567
ECA349	TRUE	C	1e-5	1e-5	0.9999	1e-5	1e-5	1e-5	1e-5	1e-5	1e-5	1e-5	1e-5	FALSE	47850347	100089639	0.47807492841491817
ECA36	FALSE	F	1.3e-5	1.9e-5	1e-5	1e-5	1e-5	0.999888	1e-5	1e-5	1e-5	1e-5	1e-5	FALSE	302212	100089639	0.0030194134279972777
ECA363	FALSE	F	1e-5	1e-5	1e-5	1e-5	1e-5	0.9999	1e-5	1e-5	1e-5	1e-5	1e-5	TRUE	707350	100089639	0.007067165063908363
ECA369	FALSE	A	0.9999	1e-5	1e-5	1e-5	1e-5	1e-5	1e-5	1e-5	1e-5	1e-5	1e-5	TRUE	2317366	100089639	0.02315290596662058
ECA372	TRUE	E	1.8e-5	1e-5	0.232283	1e-5	0.766152	1e-5	1e-5	1e-5	1e-5	0.001477	1e-5	TRUE	14575644	100089639	0.14562590239735004
ECA396	FALSE	H	1e-5	1e-5	1e-5	1e-5	1e-5	1e-5	1e-5	0.9999	1e-5	1e-5	1e-5	TRUE	680265	100089639	0.006796557633702725
ECA701	FALSE	F	0.250814	1e-5	1e-5	1e-5	1e-5	0.58748	1e-5	0.161626	1e-5	1e-5	1e-5	TRUE	181973	100089639	0.0018181002730961993
ECA703	FALSE	A	0.9999	1e-5	1e-5	1e-5	1e-5	1e-5	1e-5	1e-5	1e-5	1e-5	1e-5	TRUE	5438720	100089639	0.05433849151958676
ECA705	TRUE	E	1e-5	1e-5	1e-5	1e-5	0.9999	1e-5	1e-5	1e-5	1e-5	1e-5	1e-5	TRUE	13230104	100089639	0.1321825528814226
ECA706	FALSE	A	0.856741	1e-5	1e-5	1e-5	0.143163	1e-5	1e-5	1.6e-5	1e-5	1e-5	1e-5	TRUE	6287738	100089639	0.06282106782301412
ECA710	TRUE	E	1e-5	1e-5	0.071425	1e-5	0.928485	1e-5	1e-5	1e-5	1e-5	1e-5	1e-5	TRUE	13461028	100089639	0.13448972475562632
ECA712	TRUE	E	1e-5	1e-5	1e-5	1e-5	0.9999	1e-5	1e-5	1e-5	1e-5	1e-5	1e-5	TRUE	11054263	100089639	0.11044362943501075
ECA722	FALSE	H	1e-5	1e-5	1e-5	1e-5	1e-5	1e-5	1e-5	0.9999	1e-5	1e-5	1e-5	TRUE	871800	100089639	0.008710192270750422
ECA723	FALSE	H	1.3e-5	1.6e-5	1e-5	1e-5	1e-5	1e-5	1e-5	0.999884	1.7e-5	1e-5	1e-5	TRUE	495633	100089639	0.004951891174270296
ECA724	FALSE	F	1e-5	1e-5	0.008431	1e-5	1e-5	0.991476	1.3e-5	1e-5	1e-5	1e-5	1e-5	TRUE	1184468	100089639	0.011834072056149588
ECA730	FALSE	H	1e-5	1e-5	1e-5	1e-5	1e-5	1e-5	1e-5	0.9999	1e-5	1e-5	1e-5	TRUE	1300314	100089639	0.012991494554196563
ECA732	FALSE	A	0.9999	1e-5	1e-5	1e-5	1e-5	1e-5	1e-5	1e-5	1e-5	1e-5	1e-5	TRUE	2459989	100089639	0.024577858653281784
ECA733	FALSE	A	0.9999	1e-5	1e-5	1e-5	1e-5	1e-5	1e-5	1e-5	1e-5	1e-5	1e-5	TRUE	2515978	100089639	0.02513724722296181
ECA738	TRUE	E	1e-5	1e-5	0.279258	1e-5	0.720652	1e-5	1e-5	1e-5	1e-5	1e-5	1e-5	TRUE	11415172	100089639	0.11404948718018655
ECA740	FALSE	F	1e-5	1e-5	1e-5	1e-5	1e-5	0.999895	1e-5	1e-5	1.5e-5	1e-5	1e-5	TRUE	245004	100089639	0.002447845775525277
ECA741	FALSE	F	1e-5	1e-5	1e-5	1e-5	1e-5	0.999898	1e-5	1.2e-5	1e-5	1e-5	1e-5	TRUE	513117	100089639	0.005126574589803446
ECA742	FALSE	F	1e-5	1.2e-5	1e-5	1e-5	1.3e-5	0.999881	1e-5	1.6e-5	1e-5	1.8e-5	1e-5	TRUE	303556	100089639	0.003032841391305248
ECA743	TRUE	E	1e-5	0.044726	0.025694	0.052205	0.84473	1e-5	1e-5	1e-5	0.032585	1e-5	1e-5	TRUE	16035610	100089639	0.16021248712866273
ECA744	FALSE	H	1e-5	1e-5	1e-5	1e-5	1e-5	1e-5	1e-5	0.9999	1e-5	1e-5	1e-5	TRUE	849596	100089639	0.008488351126933328
ECA745	FALSE	H	1e-5	1e-5	1e-5	1.2e-5	1e-5	1e-5	1e-5	0.999898	1e-5	1e-5	1e-5	TRUE	452478	100089639	0.004520727664928435
ECA746	FALSE	H	1e-5	1e-5	1e-5	1e-5	1e-5	1e-5	1e-5	0.9999	1e-5	1e-5	1e-5	TRUE	1038498	100089639	0.010375679344792122
ECA760	TRUE	E	1e-5	1e-5	1e-5	1e-5	0.9999	1e-5	1e-5	1e-5	1e-5	1e-5	1e-5	TRUE	12683445	100089639	0.12672085868947933
ECA768	FALSE	E	1e-5	1e-5	1e-5	1.1e-5	0.999899	1e-5	1e-5	1e-5	1e-5	1e-5	1e-5	TRUE	6682588	100089639	0.06676603159693682
ECA777	TRUE	E	1e-5	1e-5	1e-5	1e-5	0.999896	1e-5	1e-5	1e-5	1.4e-5	1e-5	1e-5	TRUE	12833522	100089639	0.1282202846190703
ECA778	TRUE	E	1e-5	1e-5	1e-5	1e-5	0.999896	1e-5	1e-5	1e-5	1.4e-5	1e-5	1e-5	TRUE	12568012	100089639	0.12556756249265721
ECA807	FALSE	E	1e-5	1e-5	1e-5	1e-5	0.9999	1e-5	1e-5	1e-5	1e-5	1e-5	1e-5	TRUE	7087034	100089639	0.07080686943031136
ECA812	FALSE	E	1e-5	1e-5	1e-5	1e-5	0.999899	1e-5	1e-5	1.1e-5	1e-5	1e-5	1e-5	TRUE	7581509	100089639	0.0757471909754815
ED3011	TRUE	C	1e-5	1e-5	0.335005	0.242701	1e-5	1e-5	1e-5	1e-5	1e-5	0.135938	0.286286	FALSE	56474072	100089639	0.5642349454372595
JU1172	TRUE	C	1e-5	1e-5	0.765549	0.234361	1e-5	1e-5	1e-5	1e-5	1e-5	1e-5	1e-5	FALSE	61572965	100089639	0.615178210403976
JU2016	TRUE	C	1e-5	1e-5	0.686517	0.313393	1e-5	1e-5	1e-5	1e-5	1e-5	1e-5	1e-5	FALSE	62607866	100089639	0.6255179519630398
JU2017	TRUE	C	0.130618	0.068426	0.40346	0.272208	1e-5	1e-5	1e-5	1e-5	1e-5	0.085963	0.039275	FALSE	45922442	100089639	0.4588131444854147
JU2862	TRUE	C	1e-5	0.003358	0.426445	0.334683	1e-5	1e-5	0.030298	1e-5	0.135274	0.069892	1e-5	FALSE	54144389	100089639	0.5409589797801149
JU2866	TRUE	C	1e-5	1e-5	0.9999	1e-5	1e-5	1e-5	1e-5	1e-5	1e-5	1e-5	1e-5	FALSE	50771086	100089639	0.5072561606501548
MY23	TRUE	E	1e-5	1e-5	1e-5	1e-5	0.510437	1e-5	1e-5	1e-5	1e-5	1e-5	0.489473	FALSE	10794302	100089639	0.10784634761246366
PB306	TRUE	C	1e-5	1e-5	0.9999	1e-5	1e-5	1e-5	1e-5	1e-5	1e-5	1e-5	1e-5	FALSE	33704149	100089639	0.3367396399541415
PS2025	TRUE	C	1e-5	1e-5	0.9999	1e-5	1e-5	1e-5	1e-5	1e-5	1e-5	1e-5	1e-5	FALSE	30506886	100089639	0.30479564423246647
QG556	TRUE	C	1e-5	1e-5	0.860267	1e-5	0.139643	1e-5	1e-5	1e-5	1e-5	1e-5	1e-5	FALSE	29772807	100089639	0.297461428550062
QG557	TRUE	C	1e-5	1e-5	0.9999	1e-5	1e-5	1e-5	1e-5	1e-5	1e-5	1e-5	1e-5	FALSE	46090020	100089639	0.46048742367828904
QX1211	FALSE	F	1e-5	1e-5	1e-5	1e-5	1e-5	0.9999	1e-5	1e-5	1e-5	1e-5	1e-5	FALSE	439015	100089639	0.004386218237833788
QX1212	TRUE	C	0.043174	1e-5	0.806142	1e-5	1e-5	1e-5	1e-5	1e-5	1e-5	1e-5	0.150604	FALSE	46430681	100089639	0.463890982761962
QX1233	TRUE	C	1e-5	1e-5	0.855445	0.144465	1e-5	1e-5	1e-5	1e-5	1e-5	1e-5	1e-5	FALSE	48020451	100089639	0.4797744449852597
QX1791	TRUE	A	0.559108	0.107565	0.137053	1e-5	0.061847	1e-5	1e-5	1e-5	1e-5	1e-5	0.134366	TRUE	19071168	100089639	0.19054088105962697
QX1792	TRUE	E	1e-5	1e-5	1e-5	0.220457	0.617955	1e-5	1e-5	1e-5	1e-5	0.161508	1e-5	TRUE	26507474	100089639	0.2648373424545971
QX1793	TRUE	E	1e-5	1e-5	1e-5	1e-5	0.875683	1e-5	1e-5	1.2e-5	1e-5	0.124224	1e-5	TRUE	14026859	100089639	0.14014296724559072
QX1794	FALSE	E	1e-5	1e-5	0.10701	0.037616	0.855294	1e-5	1e-5	1e-5	1e-5	1e-5	1e-5	TRUE	11802225	100089639	0.11791655078304358
XZ1513	TRUE	E	1e-5	1e-5	0.156637	1e-5	0.843273	1e-5	1e-5	1e-5	1e-5	1e-5	1e-5	TRUE	15048046	100089639	0.15034569162548383
XZ1514	FALSE	F	1e-5	1.2e-5	1e-5	1e-5	1e-5	0.999894	1e-5	1e-5	1.3e-5	1e-5	1e-5	TRUE	1071398	100089639	0.010704384696601814
XZ1515	TRUE	E	1e-5	1e-5	0.334387	1e-5	0.569182	0.096351	1e-5	1e-5	1e-5	1e-5	1e-5	TRUE	17483115	100089639	0.174674573459097
XZ1516	FALSE	F	0.174719	1e-5	1e-5	1e-5	1e-5	0.624136	1e-5	0.201065	1e-5	1e-5	1e-5	TRUE	15079	100089639	1.5065495440542054e-4
