# Supplementary material for: Deep sampling of Hawaiian Caenorhabditis elegans reveals high genetic diversity and admixture with global populations
Source: eLife journal article supplement (doi:10.7554/elife.50465), 2019-12-03
Supplement: supp [file elife-50465-supp-v1.zip › elife_poa_e50465_Supplementary_data_1.csv]

isotype	strain	c_label	s_label	worms_on_sample	approximate_number_of_worms	latitude	longitude	island	landscape	sky_view	gridsect	gridsect_number	gridsect_direction	gridsect_radius	substrate_temperature	substrate_moisture	ambient_humidity	ambient_temperature	altitude	date	time	pcr_positive	species_id	photo_url_thumb	fixed_substrate
NA	NA	C-0001	S-05010	Yes	Some (11-25)	21.304203	-157.724406	Oahu	Wild forest	Partially Obstructed	no	NA	NA	NA	27.8	21	60.5	30.8	100.6421053	2017-08-02	09:32:00	0	Unknown	https://storage.googleapis.com/elegansvariation.org/photos/hawaii2017/C-0001.thumb.jpg	Fruit
NA	NA	C-0001	S-05020	Yes	Some (11-25)	21.304203	-157.724406	Oahu	Wild forest	Partially Obstructed	no	NA	NA	NA	27.8	21	60.5	30.8	100.6421053	2017-08-02	09:32:00	0	Unknown	https://storage.googleapis.com/elegansvariation.org/photos/hawaii2017/C-0001.thumb.jpg	Fruit
NA	NA	C-0002	S-05025	Yes	Very Few (1-3)	21.305489	-157.724256	Oahu	Wild forest	Partially Obstructed	no	NA	NA	NA	24.7	NA	67.7	28.4	91.00446429	2017-08-02	09:44:00	0	Unknown	https://storage.googleapis.com/elegansvariation.org/photos/hawaii2017/C-0002.thumb.jpg	Leaf litter
NA	NA	C-0003	NA	No	NA	21.306158	-157.724325	Oahu	Wild forest	Partially Obstructed	no	NA	NA	NA	25.1	NA	69.6	28.1	81.52747253	2017-08-02	09:49:00	NA	NA	https://storage.googleapis.com/elegansvariation.org/photos/hawaii2017/C-0003.thumb.jpg	Invertebrate
NA	NA	C-0004	S-05039	Yes	Some (11-25)	21.306319	-157.724203	Oahu	Wild forest	Partially Obstructed	no	NA	NA	NA	24.5	55.5	71.9	27.4	94.88109756	2017-08-02	09:58:00	0	Unknown	https://storage.googleapis.com/elegansvariation.org/photos/hawaii2017/C-0004.thumb.jpg	Fruit
NA	NA	C-0004	S-05042	Yes	Some (11-25)	21.306319	-157.724203	Oahu	Wild forest	Partially Obstructed	no	NA	NA	NA	24.5	55.5	71.9	27.4	94.88109756	2017-08-02	09:58:00	0	Unknown	https://storage.googleapis.com/elegansvariation.org/photos/hawaii2017/C-0004.thumb.jpg	Fruit
NA	NA	C-0004	S-05048	Yes	Some (11-25)	21.306319	-157.724203	Oahu	Wild forest	Partially Obstructed	no	NA	NA	NA	24.5	55.5	71.9	27.4	94.88109756	2017-08-02	09:58:00	0	Unknown	https://storage.googleapis.com/elegansvariation.org/photos/hawaii2017/C-0004.thumb.jpg	Fruit
NA	NA	C-0005	NA	No	NA	21.307294	-157.724275	Oahu	Wild forest	Partially Obstructed	no	NA	NA	NA	27.1	35.5	66.5	29.5	120.5344828	2017-08-02	10:08:00	NA	NA	https://storage.googleapis.com/elegansvariation.org/photos/hawaii2017/C-0005.thumb.jpg	Leaf litter
NA	NA	C-0006	S-05001	Yes	Some (11-25)	21.306356	-157.723378	Oahu	Wild forest	Partially Obstructed	no	NA	NA	NA	25	37	65.1	29.5	144.2327869	2017-08-02	10:21:00	0	Unknown	https://storage.googleapis.com/elegansvariation.org/photos/hawaii2017/C-0006.thumb.jpg	Leaf litter
NA	NA	C-0006	S-05006	Yes	Some (11-25)	21.306356	-157.723378	Oahu	Wild forest	Partially Obstructed	no	NA	NA	NA	25	37	65.1	29.5	144.2327869	2017-08-02	10:21:00	NA	NA	https://storage.googleapis.com/elegansvariation.org/photos/hawaii2017/C-0006.thumb.jpg	Leaf litter
NA	NA	C-0007	S-05029	Yes	Very Few (1-3)	21.307472	-157.722292	Oahu	Wild forest	Partially Obstructed	no	NA	NA	NA	24.4	40	72.2	27.4	218.5114155	2017-08-02	10:52:00	0	Unknown	https://storage.googleapis.com/elegansvariation.org/photos/hawaii2017/C-0007.thumb.jpg	Leaf litter
NA	NA	C-0007	S-05031	Yes	Very Few (1-3)	21.307472	-157.722292	Oahu	Wild forest	Partially Obstructed	no	NA	NA	NA	24.4	40	72.2	27.4	218.5114155	2017-08-02	10:52:00	NA	NA	https://storage.googleapis.com/elegansvariation.org/photos/hawaii2017/C-0007.thumb.jpg	Leaf litter
NA	NA	C-0008	NA	Tracks	NA	21.307517	-157.722289	Oahu	Wild forest	Partially Obstructed	no	NA	NA	NA	24.1	NA	72.6	26.7	213.4736842	2017-08-02	10:57:00	NA	NA	https://storage.googleapis.com/elegansvariation.org/photos/hawaii2017/C-0008.thumb.jpg	Fungus
NA	NA	C-0009	S-05022	Yes	Few (4-10)	21.308419	-157.722431	Oahu	Wild forest	Partially Obstructed	no	NA	NA	NA	25.6	44	73.8	27.4	250.5477387	2017-08-02	11:08:00	NA	NA	https://storage.googleapis.com/elegansvariation.org/photos/hawaii2017/C-0009.thumb.jpg	Leaf litter
NA	NA	C-0009	S-05023	Yes	Few (4-10)	21.308419	-157.722431	Oahu	Wild forest	Partially Obstructed	no	NA	NA	NA	25.6	44	73.8	27.4	250.5477387	2017-08-02	11:08:00	0	Unknown	https://storage.googleapis.com/elegansvariation.org/photos/hawaii2017/C-0009.thumb.jpg	Leaf litter
NA	NA	C-0009	S-05030	Yes	Few (4-10)	21.308419	-157.722431	Oahu	Wild forest	Partially Obstructed	no	NA	NA	NA	25.6	44	73.8	27.4	250.5477387	2017-08-02	11:08:00	NA	NA	https://storage.googleapis.com/elegansvariation.org/photos/hawaii2017/C-0009.thumb.jpg	Leaf litter
NA	NA	C-0010	NA	No	NA	21.308633	-157.722608	Oahu	Wild forest	Partially Obstructed	no	NA	NA	NA	24.5	39	79.1	27.4	262.4184397	2017-08-02	11:03:00	NA	NA	https://storage.googleapis.com/elegansvariation.org/photos/hawaii2017/C-0010.thumb.jpg	Leaf litter
NA	NA	C-0011	NA	No	NA	21.307575	-157.722578	Oahu	Wild forest	Partially Obstructed	no	NA	NA	NA	25.8	NA	71.7	28.1	222.2000657	2017-08-02	10:49:00	NA	NA	https://storage.googleapis.com/elegansvariation.org/photos/hawaii2017/C-0011.thumb.jpg	Vegetation
NA	NA	C-0012	S-05041	Yes	Very Few (1-3)	21.307931	-157.722147	Oahu	Wild forest	Partially Obstructed	no	NA	NA	NA	24.1	33.5	73.5	28.1	309.9892473	2017-08-02	11:24:00	0	Unknown	https://storage.googleapis.com/elegansvariation.org/photos/hawaii2017/C-0012.thumb.jpg	Leaf litter
NA	NA	C-0013	NA	No	NA	21.309486	-157.721008	Oahu	Wild forest	Partially Obstructed	no	NA	NA	NA	25.6	NA	73.5	28.1	326.0833664	2017-08-02	11:27:00	NA	NA	https://storage.googleapis.com/elegansvariation.org/photos/hawaii2017/C-0013.thumb.jpg	Vegetation
NA	NA	C-0014	NA	Tracks	NA	21.311314	-157.721019	Oahu	Wild forest	Partially Obstructed	no	NA	NA	NA	24.3	45	71.3	28.2	358.6326531	2017-08-02	11:42:00	NA	NA	https://storage.googleapis.com/elegansvariation.org/photos/hawaii2017/C-0014.thumb.jpg	Leaf litter
NA	NA	C-0015	S-05036	Yes	Very Few (1-3)	21.313192	-157.721969	Oahu	Wild forest	Partially Obstructed	no	NA	NA	NA	22.9	49.5	78.9	24.7	395.3019391	2017-08-02	11:53:00	0	Unknown	https://storage.googleapis.com/elegansvariation.org/photos/hawaii2017/C-0015.thumb.jpg	Leaf litter
NA	NA	C-0016	S-05021	Yes	Very Few (1-3)	21.314133000000002	-157.722458	Oahu	Wild forest	Partially Obstructed	no	NA	NA	NA	20.9	55.5	81.3	25.3	424.9304348	2017-08-02	12:01:00	NA	NA	https://storage.googleapis.com/elegansvariation.org/photos/hawaii2017/C-0016.thumb.jpg	Fruit
NA	NA	C-0017	NA	No	NA	21.314208	-157.722581	Oahu	Wild forest	Partially Obstructed	no	NA	NA	NA	21.6	49.5	86.8	24.7	436.3756098	2017-08-02	12:11:00	NA	NA	https://storage.googleapis.com/elegansvariation.org/photos/hawaii2017/C-0017.thumb.jpg	Leaf litter
NA	NA	C-0018	NA	No	NA	21.318233	-157.723625	Oahu	Wild forest	Partially Obstructed	no	NA	NA	NA	27.2	32	81.5	27.3	545.13	2017-08-02	12:36:00	NA	NA	https://storage.googleapis.com/elegansvariation.org/photos/hawaii2017/C-0018.thumb.jpg	Leaf litter
NA	NA	C-0019	NA	No	NA	21.320464	-157.723114	Oahu	Wild forest	Full	no	NA	NA	NA	26.7	60	87.7	24	631.4885496	2017-08-02	13:16:00	NA	NA	https://storage.googleapis.com/elegansvariation.org/photos/hawaii2017/C-0019.thumb.jpg	Fruit
NA	NA	C-0020	NA	No	NA	21.315164	-157.723381	Oahu	Wild forest	Partially Obstructed	no	NA	NA	NA	21.9	54.5	89.2	24	464.1857143	2017-08-02	13:40:00	NA	NA	https://storage.googleapis.com/elegansvariation.org/photos/hawaii2017/C-0020.thumb.jpg	Leaf litter
NA	NA	C-0021	S-05024	Yes	Very Few (1-3)	21.314639	-157.723014	Oahu	Wild forest	Partially Obstructed	no	NA	NA	NA	21.7	58	90.6	24	445.5323741	2017-08-02	13:45:00	0	Unknown	https://storage.googleapis.com/elegansvariation.org/photos/hawaii2017/C-0021.thumb.jpg	Leaf litter
NA	NA	C-0021	S-05028	Yes	Very Few (1-3)	21.314639	-157.723014	Oahu	Wild forest	Partially Obstructed	no	NA	NA	NA	21.7	58	90.6	24	445.5323741	2017-08-02	13:45:00	NA	NA	https://storage.googleapis.com/elegansvariation.org/photos/hawaii2017/C-0021.thumb.jpg	Leaf litter
NA	NA	C-0022	S-05033	Yes	Few (4-10)	21.313558	-157.722117	Oahu	Wild forest	Partially Obstructed	no	NA	NA	NA	22.2	52.5	87.7	24.7	413.4662921	2017-08-02	13:50:00	NA	NA	https://storage.googleapis.com/elegansvariation.org/photos/hawaii2017/C-0022.thumb.jpg	Leaf litter
NA	NA	C-0023	NA	No	NA	21.311078	-157.721069	Oahu	Wild forest	Partially Obstructed	no	NA	NA	NA	22.9	53.5	85.7	24.7	343.2487047	2017-08-02	13:58:00	NA	NA	https://storage.googleapis.com/elegansvariation.org/photos/hawaii2017/C-0023.thumb.jpg	Leaf litter
NA	NA	C-0024	NA	No	NA	21.364092	-157.781353	Oahu	Wild forest	Partially Obstructed	no	NA	NA	NA	27	39	70.3	28.77777777777778	234.638009	2017-08-03	11:37:00	NA	NA	https://storage.googleapis.com/elegansvariation.org/photos/hawaii2017/C-0024.thumb.jpg	Leaf litter
NA	NA	C-0025	S-05063	Yes	Very Few (1-3)	21.315175	-157.857217	Oahu	Rural garden	Partially Obstructed	no	NA	NA	NA	32.3	55	54.9	34.3	8.643432716	2017-08-03	14:55:00	0	Unknown	https://storage.googleapis.com/elegansvariation.org/photos/hawaii2017/C-0025.thumb.jpg	Fruit
NA	NA	C-0025	S-05067	Yes	Very Few (1-3)	21.315175	-157.857217	Oahu	Rural garden	Partially Obstructed	no	NA	NA	NA	32.3	55	54.9	34.3	8.643432716	2017-08-03	14:55:00	0	Unknown	https://storage.googleapis.com/elegansvariation.org/photos/hawaii2017/C-0025.thumb.jpg	Fruit
NA	NA	C-0026	S-05070	Yes	Very Few (1-3)	21.315108	-157.857536	Oahu	Rural garden	Partially Obstructed	no	NA	NA	NA	26.8	54.5	55	31.5	9.704651163	2017-08-03	15:00:00	0	Unknown	https://storage.googleapis.com/elegansvariation.org/photos/hawaii2017/C-0026.thumb.jpg	Leaf litter
NA	NA	C-0027	NA	Tracks	NA	21.333292	-157.801125	Oahu	Wild forest	Partially Obstructed	no	NA	NA	NA	23	44	98.6	22.9	137.3561644	2017-08-04	07:16:00	NA	NA	https://storage.googleapis.com/elegansvariation.org/photos/hawaii2017/C-0027.thumb.jpg	Flower
NA	NA	C-0028	S-05017	Yes	Very Few (1-3)	21.309397	-157.721036	Oahu	Wild forest	Partially Obstructed	no	NA	NA	NA	23.5	53	73.5	28.1	316.4871795	2017-08-02	11:37:00	NA	NA	https://storage.googleapis.com/elegansvariation.org/photos/hawaii2017/C-0028.thumb.jpg	Leaf litter
NA	NA	C-0028	S-05026	Yes	Very Few (1-3)	21.309397	-157.721036	Oahu	Wild forest	Partially Obstructed	no	NA	NA	NA	23.5	53	73.5	28.1	316.4871795	2017-08-02	11:37:00	0	Unknown	https://storage.googleapis.com/elegansvariation.org/photos/hawaii2017/C-0028.thumb.jpg	Leaf litter
NA	NA	C-0029	S-05113	Yes	Proliferating (25+)	21.380456	-157.799711	Oahu	Rural garden	Partially Obstructed	no	NA	NA	NA	26.9	59	79.9	27	98.8828125	2017-08-04	09:51:00	1	C. oiwi	https://storage.googleapis.com/elegansvariation.org/photos/hawaii2017/C-0029.thumb.jpg	Fruit
NA	NA	C-0030	S-05027	Yes	Very Few (1-3)	21.305025	-157.724289	Oahu	Wild forest	Partially Obstructed	no	NA	NA	NA	29.2	NA	34	29.5	93.72883436	2017-08-02	09:38:00	1	Oscheius sp.	https://storage.googleapis.com/elegansvariation.org/photos/hawaii2017/C-0030.thumb.jpg	Leaf litter
NA	NA	C-0031	NA	No	NA	21.385858	-157.80604400000001	Oahu	Rural garden	Partially Obstructed	no	NA	NA	NA	26.6	39.5	73.1	27	69.20264317	2017-08-04	10:45:00	NA	NA	https://storage.googleapis.com/elegansvariation.org/photos/hawaii2017/C-0031.thumb.jpg	Fruit
NA	NA	C-0032	S-05091	Yes	Proliferating (25+)	21.385961000000002	-157.806158	Oahu	Rural garden	Partially Obstructed	no	NA	NA	NA	26.9	37	81	27	68.61188811	2017-08-04	10:47:00	0	Unknown	https://storage.googleapis.com/elegansvariation.org/photos/hawaii2017/C-0032.thumb.jpg	Leaf litter
NA	NA	C-0032	S-05093	Yes	Proliferating (25+)	21.385961000000002	-157.806158	Oahu	Rural garden	Partially Obstructed	no	NA	NA	NA	26.9	37	81	27	68.61188811	2017-08-04	10:47:00	0	Unknown	https://storage.googleapis.com/elegansvariation.org/photos/hawaii2017/C-0032.thumb.jpg	Leaf litter
NA	NA	C-0033	NA	No	NA	21.385447	-157.806431	Oahu	Rural garden	Partially Obstructed	no	NA	NA	NA	26	NA	73.1	27	69.7699115	2017-08-04	10:41:00	NA	NA	https://storage.googleapis.com/elegansvariation.org/photos/hawaii2017/C-0033.thumb.jpg	Flower
NA	NA	C-0034	S-05115	Yes	Very Few (1-3)	21.386039	-157.806203	Oahu	Rural garden	Partially Obstructed	no	NA	NA	NA	24.1	30	75.4	27	67.60194175	2017-08-04	10:49:00	NA	NA	https://storage.googleapis.com/elegansvariation.org/photos/hawaii2017/C-0034.thumb.jpg	Leaf litter
NA	NA	C-0035	NA	No	NA	21.386431	-157.803261	Oahu	Rural garden	Partially Obstructed	no	NA	NA	NA	24.9	32	78.1	26.3	67.73280423	2017-08-04	10:22:00	NA	NA	https://storage.googleapis.com/elegansvariation.org/photos/hawaii2017/C-0035.thumb.jpg	Leaf litter
NA	NA	C-0036	NA	Tracks	NA	21.381903	-157.803325	Oahu	Rural garden	Partially Obstructed	no	NA	NA	NA	25.2	NA	81	26.3	78.93977273	2017-08-04	10:06:00	NA	NA	https://storage.googleapis.com/elegansvariation.org/photos/hawaii2017/C-0036.thumb.jpg	Fruit
NA	NA	C-0037	S-05094	Yes	Proliferating (25+)	21.380194	-157.803497	Oahu	Rural garden	Obstructed	no	NA	NA	NA	25.1	56	75	27.7	87.86738351	2017-08-04	09:59:00	NA	NA	https://storage.googleapis.com/elegansvariation.org/photos/hawaii2017/C-0037.thumb.jpg	Flower
NA	NA	C-0037	S-05095	Yes	Proliferating (25+)	21.380194	-157.803497	Oahu	Rural garden	Obstructed	no	NA	NA	NA	25.1	56	75	27.7	87.86738351	2017-08-04	09:59:00	1	C. oiwi	https://storage.googleapis.com/elegansvariation.org/photos/hawaii2017/C-0037.thumb.jpg	Flower
NA	NA	C-0037	S-05104	Yes	Proliferating (25+)	21.380194	-157.803497	Oahu	Rural garden	Obstructed	no	NA	NA	NA	25.1	56	75	27.7	87.86738351	2017-08-04	09:59:00	NA	NA	https://storage.googleapis.com/elegansvariation.org/photos/hawaii2017/C-0037.thumb.jpg	Flower
NA	NA	C-0038	S-05003	Yes	Very Few (1-3)	21.312139	-157.721692	Oahu	Wild forest	Partially Obstructed	no	NA	NA	NA	22.8	53.5	71.1	26.7	389.2580645	2017-08-02	11:49:00	NA	NA	https://storage.googleapis.com/elegansvariation.org/photos/hawaii2017/C-0038.thumb.jpg	Leaf litter
NA	NA	C-0038	S-05019	Yes	Very Few (1-3)	21.312139	-157.721692	Oahu	Wild forest	Partially Obstructed	no	NA	NA	NA	22.8	53.5	71.1	26.7	389.2580645	2017-08-02	11:49:00	0	Unknown	https://storage.googleapis.com/elegansvariation.org/photos/hawaii2017/C-0038.thumb.jpg	Leaf litter
NA	NA	C-0039	S-05012	Yes	Very Few (1-3)	21.314181	-157.722486	Oahu	Wild forest	Partially Obstructed	no	NA	NA	NA	21.6	57.5	85.6	24.7	431.312	2017-08-02	11:59:00	1	Oscheius sp.	https://storage.googleapis.com/elegansvariation.org/photos/hawaii2017/C-0039.thumb.jpg	Leaf litter
NA	NA	C-0040	S-05098	Yes	Few (4-10)	21.380525	-157.799769	Oahu	Rural garden	Partially Obstructed	no	NA	NA	NA	26.5	50	77.1	27	98.62823062	2017-08-04	09:53:00	NA	NA	https://storage.googleapis.com/elegansvariation.org/photos/hawaii2017/C-0040.thumb.jpg	Fruit
NA	NA	C-0040	S-05101	Yes	Few (4-10)	21.380525	-157.799769	Oahu	Rural garden	Partially Obstructed	no	NA	NA	NA	26.5	50	77.1	27	98.62823062	2017-08-04	09:53:00	NA	NA	https://storage.googleapis.com/elegansvariation.org/photos/hawaii2017/C-0040.thumb.jpg	Fruit
NA	NA	C-0041	S-05011	Yes	Very Few (1-3)	21.306561	-157.723156	Oahu	Wild forest	Partially Obstructed	no	NA	NA	NA	24.8	44.5	73.7	27.4	152.0687204	2017-08-02	10:42:00	NA	NA	https://storage.googleapis.com/elegansvariation.org/photos/hawaii2017/C-0041.thumb.jpg	Leaf litter
NA	NA	C-0042	NA	No	NA	21.315672	-157.856792	Oahu	Rural garden	Partially Obstructed	no	NA	NA	NA	30.2	NA	51.1	31.5	28.54913295	2017-08-03	14:50:00	NA	NA	https://storage.googleapis.com/elegansvariation.org/photos/hawaii2017/C-0042.thumb.jpg	Flower
NA	NA	C-0043	S-05032	Yes	Some (11-25)	21.315943999999998	-157.857283	Oahu	Rural garden	Partially Obstructed	no	NA	NA	NA	30	NA	58.2	30.8	23.12322946	2017-08-03	15:17:00	NA	NA	https://storage.googleapis.com/elegansvariation.org/photos/hawaii2017/C-0043.thumb.jpg	Flower
NA	NA	C-0043	S-05038	Yes	Some (11-25)	21.315943999999998	-157.857283	Oahu	Rural garden	Partially Obstructed	no	NA	NA	NA	30	NA	58.2	30.8	23.12322946	2017-08-03	15:17:00	NA	NA	https://storage.googleapis.com/elegansvariation.org/photos/hawaii2017/C-0043.thumb.jpg	Flower
NA	NA	C-0043	S-05040	Yes	Some (11-25)	21.315943999999998	-157.857283	Oahu	Rural garden	Partially Obstructed	no	NA	NA	NA	30	NA	58.2	30.8	23.12322946	2017-08-03	15:17:00	NA	NA	https://storage.googleapis.com/elegansvariation.org/photos/hawaii2017/C-0043.thumb.jpg	Flower
NA	NA	C-0044	NA	No	NA	21.333839	-157.80075	Oahu	Wild forest	Partially Obstructed	no	NA	NA	NA	23.3	51.5	93.2	23.6	140.604878	2017-08-04	07:20:00	NA	NA	https://storage.googleapis.com/elegansvariation.org/photos/hawaii2017/C-0044.thumb.jpg	Flower
NA	NA	C-0045	S-05080	Yes	Few (4-10)	21.320142	-157.855097	Oahu	Urban garden	Partially Obstructed	no	NA	NA	NA	25.4	40	71.7	26.3	16.9713877	2017-08-04	08:40:00	NA	NA	https://storage.googleapis.com/elegansvariation.org/photos/hawaii2017/C-0045.thumb.jpg	Fruit
NA	NA	C-0045	S-05081	Yes	Few (4-10)	21.320142	-157.855097	Oahu	Urban garden	Partially Obstructed	no	NA	NA	NA	25.4	40	71.7	26.3	16.9713877	2017-08-04	08:40:00	NA	NA	https://storage.googleapis.com/elegansvariation.org/photos/hawaii2017/C-0045.thumb.jpg	Fruit
NA	NA	C-0046	S-05002	Yes	Few (4-10)	21.306325	-157.724197	Oahu	Wild forest	Partially Obstructed	no	NA	NA	NA	24.3	58.5	72.4	28.1	100.684466	2017-08-02	09:55:00	NA	NA	https://storage.googleapis.com/elegansvariation.org/photos/hawaii2017/C-0046.thumb.jpg	Fruit
NA	NA	C-0046	S-05004	Yes	Few (4-10)	21.306325	-157.724197	Oahu	Wild forest	Partially Obstructed	no	NA	NA	NA	24.3	58.5	72.4	28.1	100.684466	2017-08-02	09:55:00	NA	NA	https://storage.googleapis.com/elegansvariation.org/photos/hawaii2017/C-0046.thumb.jpg	Fruit
NA	NA	C-0046	S-05008	Yes	Few (4-10)	21.306325	-157.724197	Oahu	Wild forest	Partially Obstructed	no	NA	NA	NA	24.3	58.5	72.4	28.1	100.684466	2017-08-02	09:55:00	NA	NA	https://storage.googleapis.com/elegansvariation.org/photos/hawaii2017/C-0046.thumb.jpg	Fruit
NA	NA	C-0047	S-05103	Yes	Very Few (1-3)	21.380372	-157.799964	Oahu	Rural garden	Partially Obstructed	no	NA	NA	NA	27.3	NA	77.1	26.3	99.87410072	2017-08-04	09:35:00	1	C. oiwi	https://storage.googleapis.com/elegansvariation.org/photos/hawaii2017/C-0047.thumb.jpg	Fruit
NA	NA	C-0048	S-05090	Yes	Very Few (1-3)	21.379644	-157.799853	Oahu	Rural garden	Partially Obstructed	no	NA	NA	NA	26.6	NA	79.3	27	98.71020408	2017-08-04	09:41:00	NA	NA	https://storage.googleapis.com/elegansvariation.org/photos/hawaii2017/C-0048.thumb.jpg	Fruit
NA	NA	C-0048	S-05092	Yes	Very Few (1-3)	21.379644	-157.799853	Oahu	Rural garden	Partially Obstructed	no	NA	NA	NA	26.6	NA	79.3	27	98.71020408	2017-08-04	09:41:00	NA	NA	https://storage.googleapis.com/elegansvariation.org/photos/hawaii2017/C-0048.thumb.jpg	Fruit
NA	NA	C-0048	S-05099	Yes	Very Few (1-3)	21.379644	-157.799853	Oahu	Rural garden	Partially Obstructed	no	NA	NA	NA	26.6	NA	79.3	27	98.71020408	2017-08-04	09:41:00	NA	NA	https://storage.googleapis.com/elegansvariation.org/photos/hawaii2017/C-0048.thumb.jpg	Fruit
NA	NA	C-0049	S-05014	Yes	Some (11-25)	21.306561	-157.723156	Oahu	Wild forest	Partially Obstructed	no	NA	NA	NA	26.6	53	66.2	29.5	152.1705202	2017-08-02	10:25:00	0	Unknown	https://storage.googleapis.com/elegansvariation.org/photos/hawaii2017/C-0049.thumb.jpg	Leaf litter
NA	NA	C-0049	S-05015	Yes	Some (11-25)	21.306561	-157.723156	Oahu	Wild forest	Partially Obstructed	no	NA	NA	NA	26.6	53	66.2	29.5	152.1705202	2017-08-02	10:25:00	0	Unknown	https://storage.googleapis.com/elegansvariation.org/photos/hawaii2017/C-0049.thumb.jpg	Leaf litter
NA	NA	C-0049	S-05016	Yes	Some (11-25)	21.306561	-157.723156	Oahu	Wild forest	Partially Obstructed	no	NA	NA	NA	26.6	53	66.2	29.5	152.1705202	2017-08-02	10:25:00	0	Unknown	https://storage.googleapis.com/elegansvariation.org/photos/hawaii2017/C-0049.thumb.jpg	Leaf litter
NA	NA	C-0050	S-05109	Yes	Proliferating (25+)	21.379406	-157.799903	Oahu	Rural garden	Partially Obstructed	no	NA	NA	NA	26.4	NA	75.5	27.7	99.32903226	2017-08-04	09:44:00	NA	NA	https://storage.googleapis.com/elegansvariation.org/photos/hawaii2017/C-0050.thumb.jpg	Fruit
NA	NA	C-0050	S-05111	Yes	Proliferating (25+)	21.379406	-157.799903	Oahu	Rural garden	Partially Obstructed	no	NA	NA	NA	26.4	NA	75.5	27.7	99.32903226	2017-08-04	09:44:00	NA	NA	https://storage.googleapis.com/elegansvariation.org/photos/hawaii2017/C-0050.thumb.jpg	Fruit
NA	NA	C-0050	S-05112	Yes	Proliferating (25+)	21.379406	-157.799903	Oahu	Rural garden	Partially Obstructed	no	NA	NA	NA	26.4	NA	75.5	27.7	99.32903226	2017-08-04	09:44:00	NA	NA	https://storage.googleapis.com/elegansvariation.org/photos/hawaii2017/C-0050.thumb.jpg	Fruit
NA	NA	C-0050	S-05120	Yes	Proliferating (25+)	21.379406	-157.799903	Oahu	Rural garden	Partially Obstructed	no	NA	NA	NA	26.4	NA	75.5	27.7	99.32903226	2017-08-04	09:44:00	NA	NA	https://storage.googleapis.com/elegansvariation.org/photos/hawaii2017/C-0050.thumb.jpg	Fruit
NA	NA	C-0051	S-05064	Yes	Very Few (1-3)	21.359433	-157.805756	Oahu	Wild forest	Full	no	NA	NA	NA	24.4	53	72.9	26	324.9030303	2017-08-03	08:29:00	NA	NA	https://storage.googleapis.com/elegansvariation.org/photos/hawaii2017/C-0051.thumb.jpg	Leaf litter
NA	NA	C-0051	S-05073	Yes	Very Few (1-3)	21.359433	-157.805756	Oahu	Wild forest	Full	no	NA	NA	NA	24.4	53	72.9	26	324.9030303	2017-08-03	08:29:00	0	Unknown	https://storage.googleapis.com/elegansvariation.org/photos/hawaii2017/C-0051.thumb.jpg	Leaf litter
NA	NA	C-0052	S-05055	Yes	Proliferating (25+)	21.353661	-157.810692	Oahu	Wild forest	Partially Obstructed	no	NA	NA	NA	22.1	52.5	81.3	24.7	308.0181406	2017-08-03	08:46:00	0	Unknown	https://storage.googleapis.com/elegansvariation.org/photos/hawaii2017/C-0052.thumb.jpg	Leaf litter
NA	NA	C-0053	S-05061	Yes	Very Few (1-3)	21.351381	-157.806161	Oahu	Wild forest	Obstructed	no	NA	NA	NA	22.5	43.5	78.9	24.7	313.2915767	2017-08-03	09:08:00	1	C. oiwi	https://storage.googleapis.com/elegansvariation.org/photos/hawaii2017/C-0053.thumb.jpg	Flower
NA	NA	C-0054	NA	No	NA	21.353181	-157.808464	Oahu	Wild forest	Full	no	NA	NA	NA	27	33	70.6	26	312.2580071	2017-08-03	08:56:00	NA	NA	https://storage.googleapis.com/elegansvariation.org/photos/hawaii2017/C-0054.thumb.jpg	Leaf litter
NA	NA	C-0055	S-05075	Yes	Proliferating (25+)	21.354133	-157.810183	Oahu	Wild forest	Partially Obstructed	no	NA	NA	NA	22.6	57	78.9	24.7	311.9666269	2017-08-03	08:50:00	1	C. oiwi	https://storage.googleapis.com/elegansvariation.org/photos/hawaii2017/C-0055.thumb.jpg	Flower
NA	NA	C-0055	S-05077	Yes	Proliferating (25+)	21.354133	-157.810183	Oahu	Wild forest	Partially Obstructed	no	NA	NA	NA	22.6	57	78.9	24.7	311.9666269	2017-08-03	08:50:00	1	C. oiwi	https://storage.googleapis.com/elegansvariation.org/photos/hawaii2017/C-0055.thumb.jpg	Flower
NA	NA	C-0056	NA	Tracks	NA	21.308586	-157.721964	Oahu	Wild forest	Partially Obstructed	no	NA	NA	NA	25	27	72.3	29.5	278.7562189	2017-08-02	11:17:00	NA	NA	https://storage.googleapis.com/elegansvariation.org/photos/hawaii2017/C-0056.thumb.jpg	Leaf litter
NA	NA	C-0057	S-05005	Yes	Few (4-10)	21.314214	-157.7226	Oahu	Wild forest	Partially Obstructed	no	NA	NA	NA	22	35.5	81.5	25.3	436.2609819	2017-08-02	12:04:00	NA	NA	https://storage.googleapis.com/elegansvariation.org/photos/hawaii2017/C-0057.thumb.jpg	Fruit
NA	NA	C-0057	S-05007	Yes	Few (4-10)	21.314214	-157.7226	Oahu	Wild forest	Partially Obstructed	no	NA	NA	NA	22	35.5	81.5	25.3	436.2609819	2017-08-02	12:04:00	NA	NA	https://storage.googleapis.com/elegansvariation.org/photos/hawaii2017/C-0057.thumb.jpg	Fruit
NA	NA	C-0057	S-05013	Yes	Few (4-10)	21.314214	-157.7226	Oahu	Wild forest	Partially Obstructed	no	NA	NA	NA	22	35.5	81.5	25.3	436.2609819	2017-08-02	12:04:00	0	Unknown	https://storage.googleapis.com/elegansvariation.org/photos/hawaii2017/C-0057.thumb.jpg	Fruit
NA	NA	C-0058	S-05108	Yes	Very Few (1-3)	21.380481	-157.799983	Oahu	Rural garden	Partially Obstructed	no	NA	NA	NA	26.2	53	76.4	27.7	101.5946844	2017-08-04	09:33:00	1	Oscheius sp.	https://storage.googleapis.com/elegansvariation.org/photos/hawaii2017/C-0058.thumb.jpg	Leaf litter
NA	NA	C-0059	NA	Tracks	NA	21.336539	-157.799636	Oahu	Wild forest	Full	no	NA	NA	NA	23.8	56	97.1	22.9	175.9595376	2017-08-04	07:39:00	NA	NA	https://storage.googleapis.com/elegansvariation.org/photos/hawaii2017/C-0059.thumb.jpg	Flower
NA	NA	C-0060	NA	No	NA	21.341519	-157.799472	Oahu	Wild forest	Partially Obstructed	no	NA	NA	NA	22.3	60	96.1	22.2	264.3141994	2017-08-04	07:53:00	NA	NA	https://storage.googleapis.com/elegansvariation.org/photos/hawaii2017/C-0060.thumb.jpg	Flower
NA	NA	C-0061	S-05106	Yes	Few (4-10)	21.380164	-157.800606	Oahu	Rural garden	Partially Obstructed	no	NA	NA	NA	26.4	50	77.1	27.2	98.68586387	2017-08-04	09:47:00	NA	NA	https://storage.googleapis.com/elegansvariation.org/photos/hawaii2017/C-0061.thumb.jpg	Leaf litter
NA	NA	C-0061	S-05107	Yes	Few (4-10)	21.380164	-157.800606	Oahu	Rural garden	Partially Obstructed	no	NA	NA	NA	26.4	50	77.1	27.2	98.68586387	2017-08-04	09:47:00	0	Unknown	https://storage.googleapis.com/elegansvariation.org/photos/hawaii2017/C-0061.thumb.jpg	Leaf litter
NA	NA	C-0061	S-05116	Yes	Few (4-10)	21.380164	-157.800606	Oahu	Rural garden	Partially Obstructed	no	NA	NA	NA	26.4	50	77.1	27.2	98.68586387	2017-08-04	09:47:00	0	Unknown	https://storage.googleapis.com/elegansvariation.org/photos/hawaii2017/C-0061.thumb.jpg	Leaf litter
NA	NA	C-0062	S-05105	Yes	Few (4-10)	21.338567	-157.799989	Oahu	Wild forest	Partially Obstructed	no	NA	NA	NA	22.1	60.5	98.5	22.9	205.5173502	2017-08-04	07:45:00	0	Unknown	https://storage.googleapis.com/elegansvariation.org/photos/hawaii2017/C-0062.thumb.jpg	Leaf litter
NA	NA	C-0062	S-05110	Yes	Few (4-10)	21.338567	-157.799989	Oahu	Wild forest	Partially Obstructed	no	NA	NA	NA	22.1	60.5	98.5	22.9	205.5173502	2017-08-04	07:45:00	0	Unknown	https://storage.googleapis.com/elegansvariation.org/photos/hawaii2017/C-0062.thumb.jpg	Leaf litter
NA	NA	C-0063	S-05062	Yes	Very Few (1-3)	21.351458	-157.806072	Oahu	Wild forest	Obstructed	no	NA	NA	NA	22.3	56	80.5	24	311.9304348	2017-08-03	09:05:00	1	Oscheius sp.	https://storage.googleapis.com/elegansvariation.org/photos/hawaii2017/C-0063.thumb.jpg	Leaf litter
NA	NA	C-0064	NA	No	NA	21.350156	-157.806275	Oahu	Wild forest	Obstructed	no	NA	NA	NA	21.7	57.5	84.8	23.3	314.7095436	2017-08-03	09:12:00	NA	NA	https://storage.googleapis.com/elegansvariation.org/photos/hawaii2017/C-0064.thumb.jpg	Leaf litter
NA	NA	C-0065	S-05082	Yes	Proliferating (25+)	21.349858	-157.805975	Oahu	Wild forest	Obstructed	no	NA	NA	NA	21.8	46	77.8	24	322.8517588	2017-08-03	09:15:00	1	C. oiwi	https://storage.googleapis.com/elegansvariation.org/photos/hawaii2017/C-0065.thumb.jpg	Flower
NA	NA	C-0065	S-05096	Yes	Proliferating (25+)	21.349858	-157.805975	Oahu	Wild forest	Obstructed	no	NA	NA	NA	21.8	46	77.8	24	322.8517588	2017-08-03	09:15:00	1	C. briggsae	https://storage.googleapis.com/elegansvariation.org/photos/hawaii2017/C-0065.thumb.jpg	Flower
NA	NA	C-0066	S-05054	Yes	Proliferating (25+)	21.349003	-157.805303	Oahu	Wild forest	Obstructed	no	NA	NA	NA	22.1	58.5	72.1	24.66666666666667	360.4518519	2017-08-03	09:22:00	0	Unknown	https://storage.googleapis.com/elegansvariation.org/photos/hawaii2017/C-0066.thumb.jpg	Fruit
NA	NA	C-0066	S-05059	Yes	Proliferating (25+)	21.349003	-157.805303	Oahu	Wild forest	Obstructed	no	NA	NA	NA	22.1	58.5	72.1	24.66666666666667	360.4518519	2017-08-03	09:22:00	NA	NA	https://storage.googleapis.com/elegansvariation.org/photos/hawaii2017/C-0066.thumb.jpg	Fruit
NA	NA	C-0066	S-05060	Yes	Proliferating (25+)	21.349003	-157.805303	Oahu	Wild forest	Obstructed	no	NA	NA	NA	22.1	58.5	72.1	24.66666666666667	360.4518519	2017-08-03	09:22:00	1	Oscheius sp.	https://storage.googleapis.com/elegansvariation.org/photos/hawaii2017/C-0066.thumb.jpg	Fruit
NA	NA	C-0067	NA	No	NA	21.3487	-157.805486	Oahu	Wild forest	Partially Obstructed	no	NA	NA	NA	22.9	55.5	79.3	25.388888888888893	372.6434783	2017-08-03	09:27:00	NA	NA	https://storage.googleapis.com/elegansvariation.org/photos/hawaii2017/C-0067.thumb.jpg	Leaf litter
NA	NA	C-0068	S-05009	Yes	Some (11-25)	21.3071	-157.72425	Oahu	Wild forest	Partially Obstructed	no	NA	NA	NA	27.3	NA	66.7	29.5	131.3264605	2017-08-02	10:14:00	0	Unknown	https://storage.googleapis.com/elegansvariation.org/photos/hawaii2017/C-0068.thumb.jpg	Leaf litter
NA	NA	C-0068	S-05018	Yes	Some (11-25)	21.3071	-157.72425	Oahu	Wild forest	Partially Obstructed	no	NA	NA	NA	27.3	NA	66.7	29.5	131.3264605	2017-08-02	10:14:00	0	Unknown	https://storage.googleapis.com/elegansvariation.org/photos/hawaii2017/C-0068.thumb.jpg	Leaf litter
NA	NA	C-0069	NA	No	NA	21.350806	-157.806331	Oahu	Wild forest	Obstructed	no	NA	NA	NA	22.4	42.5	84.4	24.000000000000004	312.1071429	2017-08-03	09:37:00	NA	NA	https://storage.googleapis.com/elegansvariation.org/photos/hawaii2017/C-0069.thumb.jpg	Flower
NA	NA	C-0070	NA	Tracks	NA	21.362181	-157.779636	Oahu	Wild forest	Obstructed	no	NA	NA	NA	24	56	77.5	26.72222222222222	234.6962025	2017-08-03	11:26:00	NA	NA	https://storage.googleapis.com/elegansvariation.org/photos/hawaii2017/C-0070.thumb.jpg	Leaf litter
NA	NA	C-0071	NA	Tracks	NA	21.351047	-157.806342	Oahu	Wild forest	Partially Obstructed	no	NA	NA	NA	22.5	58	81.1	24.000000000000004	313.501548	2017-08-03	09:40:00	NA	NA	https://storage.googleapis.com/elegansvariation.org/photos/hawaii2017/C-0071.thumb.jpg	Fruit
NA	NA	C-0072	S-05045	Yes	Proliferating (25+)	21.351633	-157.806033	Oahu	Wild forest	Partially Obstructed	no	NA	NA	NA	23.2	54.5	72.9	24.66666666666667	317.37751	2017-08-03	09:44:00	0	Unknown	https://storage.googleapis.com/elegansvariation.org/photos/hawaii2017/C-0072.thumb.jpg	Fruit
NA	NA	C-0072	S-05046	Yes	Proliferating (25+)	21.351633	-157.806033	Oahu	Wild forest	Partially Obstructed	no	NA	NA	NA	23.2	54.5	72.9	24.66666666666667	317.37751	2017-08-03	09:44:00	1	C. oiwi	https://storage.googleapis.com/elegansvariation.org/photos/hawaii2017/C-0072.thumb.jpg	Fruit
NA	NA	C-0073	S-05071	Yes	Few (4-10)	21.351833	-157.805953	Oahu	Wild forest	Obstructed	no	NA	NA	NA	22.6	56.5	73.4	24.66666666666667	313.0282132	2017-08-03	09:47:00	NA	NA	https://storage.googleapis.com/elegansvariation.org/photos/hawaii2017/C-0073.thumb.jpg	Leaf litter
NA	NA	C-0073	S-05083	Yes	Few (4-10)	21.351833	-157.805953	Oahu	Wild forest	Obstructed	no	NA	NA	NA	22.6	56.5	73.4	24.66666666666667	313.0282132	2017-08-03	09:47:00	NA	NA	https://storage.googleapis.com/elegansvariation.org/photos/hawaii2017/C-0073.thumb.jpg	Leaf litter
NA	NA	C-0073	S-05084	Yes	Few (4-10)	21.351833	-157.805953	Oahu	Wild forest	Obstructed	no	NA	NA	NA	22.6	56.5	73.4	24.66666666666667	313.0282132	2017-08-03	09:47:00	NA	NA	https://storage.googleapis.com/elegansvariation.org/photos/hawaii2017/C-0073.thumb.jpg	Leaf litter
NA	NA	C-0074	NA	No	NA	21.354156	-157.8101	Oahu	Wild forest	Partially Obstructed	no	NA	NA	NA	23.9	56	66.8	27.44444444444445	311.4350282	2017-08-03	09:59:00	NA	NA	https://storage.googleapis.com/elegansvariation.org/photos/hawaii2017/C-0074.thumb.jpg	Flower
NA	NA	C-0075	NA	Tracks	NA	21.364875	-157.779928	Oahu	Wild forest	Partially Obstructed	no	NA	NA	NA	25.3	55.5	72.4	27.44444444444445	199.4984026	2017-08-03	10:42:00	NA	NA	https://storage.googleapis.com/elegansvariation.org/photos/hawaii2017/C-0075.thumb.jpg	Flower
NA	NA	C-0076	S-05056	Yes	Proliferating (25+)	21.364619	-157.78015	Oahu	Wild forest	Partially Obstructed	no	NA	NA	NA	33.6	23	76.9	27.44444444444445	198.6194332	2017-08-03	10:45:00	0	Unknown	https://storage.googleapis.com/elegansvariation.org/photos/hawaii2017/C-0076.thumb.jpg	Fungus
NA	NA	C-0076	S-05057	Yes	Proliferating (25+)	21.364619	-157.78015	Oahu	Wild forest	Partially Obstructed	no	NA	NA	NA	33.6	23	76.9	27.44444444444445	198.6194332	2017-08-03	10:45:00	0	Unknown	https://storage.googleapis.com/elegansvariation.org/photos/hawaii2017/C-0076.thumb.jpg	Fungus
NA	NA	C-0076	S-05058	Yes	Proliferating (25+)	21.364619	-157.78015	Oahu	Wild forest	Partially Obstructed	no	NA	NA	NA	33.6	23	76.9	27.44444444444445	198.6194332	2017-08-03	10:45:00	NA	NA	https://storage.googleapis.com/elegansvariation.org/photos/hawaii2017/C-0076.thumb.jpg	Fungus
NA	NA	C-0077	S-05087	Yes	Very Few (1-3)	21.364069	-157.780194	Oahu	Wild forest	Partially Obstructed	no	NA	NA	NA	24.1	32	77.4	28.11111111111111	210.8734177	2017-08-03	10:50:00	0	Unknown	https://storage.googleapis.com/elegansvariation.org/photos/hawaii2017/C-0077.thumb.jpg	Leaf litter
NA	NA	C-0078	S-05066	Yes	Very Few (1-3)	21.364117	-157.781025	Oahu	Wild forest	Partially Obstructed	no	NA	NA	NA	23.3	57	72.1	26.72222222222222	225.5465116	2017-08-03	10:57:00	0	Unknown	https://storage.googleapis.com/elegansvariation.org/photos/hawaii2017/C-0078.thumb.jpg	Leaf litter
NA	NA	C-0079	NA	No	NA	21.362875	-157.780628	Oahu	Wild forest	Partially Obstructed	no	NA	NA	NA	22.8	49	73.3	26.05555555555556	237.3697479	2017-08-03	11:03:00	NA	NA	https://storage.googleapis.com/elegansvariation.org/photos/hawaii2017/C-0079.thumb.jpg	Leaf litter
NA	NA	C-0080	S-05074	Yes	Very Few (1-3)	21.362625	-157.779914	Oahu	Wild forest	Partially Obstructed	no	NA	NA	NA	24.4	38	76	26.72222222222222	238.1053391	2017-08-03	11:07:00	1	C. tropicalis	https://storage.googleapis.com/elegansvariation.org/photos/hawaii2017/C-0080.thumb.jpg	Fruit
NA	NA	C-0081	S-05043	Yes	Proliferating (25+)	21.360564	-157.778675	Oahu	Wild forest	Partially Obstructed	no	NA	NA	NA	25.4	53	69.9	28.11111111111111	239.2319277	2017-08-03	11:19:00	1	Oscheius sp.	https://storage.googleapis.com/elegansvariation.org/photos/hawaii2017/C-0081.thumb.jpg	Leaf litter
NA	NA	C-0081	S-05044	Yes	Proliferating (25+)	21.360564	-157.778675	Oahu	Wild forest	Partially Obstructed	no	NA	NA	NA	25.4	53	69.9	28.11111111111111	239.2319277	2017-08-03	11:19:00	0	Unknown	https://storage.googleapis.com/elegansvariation.org/photos/hawaii2017/C-0081.thumb.jpg	Leaf litter
NA	NA	C-0082	NA	No	NA	21.502681	-158.017478	Oahu	Rural garden	Partially Obstructed	no	NA	NA	NA	26.6	10	56.3	28.77777777777778	302.2286432	2017-08-03	12:47:00	NA	NA	https://storage.googleapis.com/elegansvariation.org/photos/hawaii2017/C-0082.thumb.jpg	Flower
NA	NA	C-0083	NA	No	NA	21.503153	-158.016658	Oahu	Rural garden	Partially Obstructed	no	NA	NA	NA	26.7	40	57.1	28.77777777777778	306.78125	2017-08-03	12:55:00	NA	NA	https://storage.googleapis.com/elegansvariation.org/photos/hawaii2017/C-0083.thumb.jpg	Fruit
NA	NA	C-0084	S-05114	Yes	Proliferating (25+)	21.336106	-157.799864	Oahu	Wild forest	Partially Obstructed	no	NA	NA	NA	22.8	50.5	95.1	22.9	168.5283019	2017-08-04	07:34:00	1	C. oiwi	https://storage.googleapis.com/elegansvariation.org/photos/hawaii2017/C-0084.thumb.jpg	Flower
NA	NA	C-0084	S-05119	Yes	Proliferating (25+)	21.336106	-157.799864	Oahu	Wild forest	Partially Obstructed	no	NA	NA	NA	22.8	50.5	95.1	22.9	168.5283019	2017-08-04	07:34:00	1	C. oiwi	https://storage.googleapis.com/elegansvariation.org/photos/hawaii2017/C-0084.thumb.jpg	Flower
NA	NA	C-0085	S-05097	Yes	Very Few (1-3)	21.336056	-157.799786	Oahu	Wild forest	Partially Obstructed	no	NA	NA	NA	22.9	60.5	93.7	22.9	169.8389831	2017-08-04	07:36:00	1	C. tropicalis	https://storage.googleapis.com/elegansvariation.org/photos/hawaii2017/C-0085.thumb.jpg	Flower
NA	NA	C-0086	NA	No	NA	21.503111	-158.017994	Oahu	Rural garden	Partially Obstructed	no	NA	NA	NA	26.9	NA	50.1	31.555555555555557	299.8040541	2017-08-03	13:16:00	NA	NA	https://storage.googleapis.com/elegansvariation.org/photos/hawaii2017/C-0086.thumb.jpg	Fruit
NA	NA	C-0087	S-05072	Yes	Very Few (1-3)	21.503733	-158.016819	Oahu	Rural garden	Partially Obstructed	no	NA	NA	NA	24.1	56	62.3	28.11111111111111	261.4870466	2017-08-03	13:00:00	0	Unknown	https://storage.googleapis.com/elegansvariation.org/photos/hawaii2017/C-0087.thumb.jpg	Leaf litter
NA	NA	C-0088	NA	Tracks	NA	21.503544	-158.017142	Oahu	Rural garden	Partially Obstructed	no	NA	NA	NA	25.8	25.5	58.7	29.499999999999996	289.2606061	2017-08-03	13:06:00	NA	NA	https://storage.googleapis.com/elegansvariation.org/photos/hawaii2017/C-0088.thumb.jpg	Flower
NA	NA	C-0089	S-05100	Yes	Few (4-10)	21.335367	-157.800017	Oahu	Wild forest	Partially Obstructed	no	NA	NA	NA	22.7	60.5	97.1	22.9	161.3880126	2017-08-04	07:30:00	NA	NA	https://storage.googleapis.com/elegansvariation.org/photos/hawaii2017/C-0089.thumb.jpg	Leaf litter
NA	NA	C-0089	S-05102	Yes	Few (4-10)	21.335367	-157.800017	Oahu	Wild forest	Partially Obstructed	no	NA	NA	NA	22.7	60.5	97.1	22.9	161.3880126	2017-08-04	07:30:00	NA	NA	https://storage.googleapis.com/elegansvariation.org/photos/hawaii2017/C-0089.thumb.jpg	Leaf litter
NA	NA	C-0090	S-05088	Yes	Very Few (1-3)	21.334344	-157.800728	Oahu	Wild forest	Full	no	NA	NA	NA	22.9	56	93.7	22.9	162.0821643	2017-08-04	07:25:00	0	Unknown	https://storage.googleapis.com/elegansvariation.org/photos/hawaii2017/C-0090.thumb.jpg	Invertebrate
NA	NA	C-0090	S-05089	Yes	Very Few (1-3)	21.334344	-157.800728	Oahu	Wild forest	Full	no	NA	NA	NA	22.9	56	93.7	22.9	162.0821643	2017-08-04	07:25:00	NA	NA	https://storage.googleapis.com/elegansvariation.org/photos/hawaii2017/C-0090.thumb.jpg	Invertebrate
NA	NA	C-0091	NA	No	NA	21.503139	-158.017917	Oahu	Rural garden	Partially Obstructed	no	NA	NA	NA	31.3	NA	50.1	31.555555555555557	290.3038348	2017-08-03	13:18:00	NA	NA	https://storage.googleapis.com/elegansvariation.org/photos/hawaii2017/C-0091.thumb.jpg	Fruit
NA	NA	C-0092	S-05085	Yes	Very Few (1-3)	21.334156	-157.800733	Oahu	Wild forest	Full	NA	NA	NA	NA	22.8	56.5	94.1	22.9	159.0974843	2017-08-04	07:22:00	NA	NA	https://storage.googleapis.com/elegansvariation.org/photos/hawaii2017/C-0092.thumb.jpg	Leaf litter
NA	NA	C-0092	S-05086	Yes	Very Few (1-3)	21.334156	-157.800733	Oahu	Wild forest	Full	NA	NA	NA	NA	22.8	56.5	94.1	22.9	159.0974843	2017-08-04	07:22:00	NA	NA	https://storage.googleapis.com/elegansvariation.org/photos/hawaii2017/C-0092.thumb.jpg	Leaf litter
NA	NA	C-0093	S-05069	Yes	Very Few (1-3)	21.361767	-157.779367	Oahu	Wild forest	Partially Obstructed	no	NA	NA	NA	23.9	55.5	78.7	27.44444444444445	243.1341463	2017-08-03	11:12:00	0	Unknown	https://storage.googleapis.com/elegansvariation.org/photos/hawaii2017/C-0093.thumb.jpg	Leaf litter
NA	NA	C-0093	S-05076	Yes	Very Few (1-3)	21.361767	-157.779367	Oahu	Wild forest	Partially Obstructed	no	NA	NA	NA	23.9	55.5	78.7	27.44444444444445	243.1341463	2017-08-03	11:12:00	0	Unknown	https://storage.googleapis.com/elegansvariation.org/photos/hawaii2017/C-0093.thumb.jpg	Leaf litter
NA	NA	C-0094	S-05047	Yes	Proliferating (25+)	21.316697	-157.857833	Oahu	Rural garden	Partially Obstructed	no	NA	NA	NA	32.9	55.5	53.6	32.9	26.74621653	2017-08-03	14:28:00	1	C. briggsae	https://storage.googleapis.com/elegansvariation.org/photos/hawaii2017/C-0094.thumb.jpg	Fruit
NA	NA	C-0094	S-05051	Yes	Proliferating (25+)	21.316697	-157.857833	Oahu	Rural garden	Partially Obstructed	no	NA	NA	NA	32.9	55.5	53.6	32.9	26.74621653	2017-08-03	14:28:00	1	C. briggsae	https://storage.googleapis.com/elegansvariation.org/photos/hawaii2017/C-0094.thumb.jpg	Fruit
NA	NA	C-0094	S-05052	Yes	Proliferating (25+)	21.316697	-157.857833	Oahu	Rural garden	Partially Obstructed	no	NA	NA	NA	32.9	55.5	53.6	32.9	26.74621653	2017-08-03	14:28:00	1	C. briggsae	https://storage.googleapis.com/elegansvariation.org/photos/hawaii2017/C-0094.thumb.jpg	Fruit
NA	NA	C-0095	S-05065	Yes	Very Few (1-3)	21.3167	-157.857878	Oahu	Rural garden	Partially Obstructed	no	NA	NA	NA	32.2	52.5	54	32.9	15.0436409	2017-08-03	14:30:00	NA	NA	https://storage.googleapis.com/elegansvariation.org/photos/hawaii2017/C-0095.thumb.jpg	Fruit
NA	NA	C-0095	S-05068	Yes	Very Few (1-3)	21.3167	-157.857878	Oahu	Rural garden	Partially Obstructed	no	NA	NA	NA	32.2	52.5	54	32.9	15.0436409	2017-08-03	14:30:00	NA	NA	https://storage.googleapis.com/elegansvariation.org/photos/hawaii2017/C-0095.thumb.jpg	Fruit
NA	NA	C-0096	S-05049	Yes	Proliferating (25+)	21.316628	-157.857789	Oahu	Rural garden	Partially Obstructed	no	NA	NA	NA	27.9	44.5	53.1	33.6	31.55212355	2017-08-03	14:34:00	1	C. briggsae	https://storage.googleapis.com/elegansvariation.org/photos/hawaii2017/C-0096.thumb.jpg	Fruit
NA	NA	C-0096	S-05050	Yes	Proliferating (25+)	21.316628	-157.857789	Oahu	Rural garden	Partially Obstructed	no	NA	NA	NA	27.9	44.5	53.1	33.6	31.55212355	2017-08-03	14:34:00	0	Unknown	https://storage.googleapis.com/elegansvariation.org/photos/hawaii2017/C-0096.thumb.jpg	Fruit
NA	NA	C-0096	S-05053	Yes	Proliferating (25+)	21.316628	-157.857789	Oahu	Rural garden	Partially Obstructed	no	NA	NA	NA	27.9	44.5	53.1	33.6	31.55212355	2017-08-03	14:34:00	1	C. briggsae	https://storage.googleapis.com/elegansvariation.org/photos/hawaii2017/C-0096.thumb.jpg	Fruit
NA	NA	C-0097	S-05035	Yes	Very Few (1-3)	21.316647	-157.857717	Oahu	Rural garden	Partially Obstructed	no	NA	NA	NA	28	24.5	55.5	30.8	20.31085044	2017-08-03	14:37:00	1	C. briggsae	https://storage.googleapis.com/elegansvariation.org/photos/hawaii2017/C-0097.thumb.jpg	Flower
NA	NA	C-0098	S-05034	Yes	Some (11-25)	21.316744	-157.857819	Oahu	Rural garden	Partially Obstructed	no	NA	NA	NA	31.2	49.5	50.2	33.6	24.2753304	2017-08-03	14:32:00	0	Unknown	https://storage.googleapis.com/elegansvariation.org/photos/hawaii2017/C-0098.thumb.jpg	Fruit
NA	NA	C-0098	S-05037	Yes	Some (11-25)	21.316744	-157.857819	Oahu	Rural garden	Partially Obstructed	no	NA	NA	NA	31.2	49.5	50.2	33.6	24.2753304	2017-08-03	14:32:00	0	Unknown	https://storage.googleapis.com/elegansvariation.org/photos/hawaii2017/C-0098.thumb.jpg	Fruit
NA	NA	C-0099	NA	No	NA	21.315656	-157.857072	Oahu	Rural garden	Partially Obstructed	no	NA	NA	NA	31.3	56.5	58.2	30.8	19.30566406	2017-08-03	15:14:00	NA	NA	https://storage.googleapis.com/elegansvariation.org/photos/hawaii2017/C-0099.thumb.jpg	Fruit
NA	NA	C-0100	NA	No	NA	21.503017	-158.017933	Oahu	Rural garden	Partially Obstructed	no	NA	NA	NA	31.1	NA	48.4	33.611111111111114	302.1266968	2017-08-03	13:20:00	NA	NA	https://storage.googleapis.com/elegansvariation.org/photos/hawaii2017/C-0100.thumb.jpg	Flower
NA	NA	C-0101	NA	No	NA	22.152778	-159.617039	Kauai	Wild forest	Partially Obstructed	no	NA	NA	NA	22.1	48	63.8	22.6	1235.899083	2017-08-07	10:31:00	NA	NA	https://storage.googleapis.com/elegansvariation.org/photos/hawaii2017/C-0101.thumb.jpg	Fruit
NA	NA	C-0102	NA	No	NA	22.154833	-159.617561	Kauai	Wild forest	Obstructed	no	NA	NA	NA	20.2	51	60.3	22.6	1305.000232	2017-08-07	10:23:00	NA	NA	https://storage.googleapis.com/elegansvariation.org/photos/hawaii2017/C-0102.thumb.jpg	Flower
NA	NA	C-0103	NA	No	NA	22.154844	-159.617533	Kauai	Wild forest	Partially Obstructed	no	NA	NA	NA	19.3	51	63.5	25.3	1293.423358	2017-08-07	10:14:00	NA	NA	https://storage.googleapis.com/elegansvariation.org/photos/hawaii2017/C-0103.thumb.jpg	Leaf litter
NA	NA	C-0104	NA	No	NA	22.195653	-159.593858	Kauai	Wild forest	Partially Obstructed	no	NA	NA	NA	24.3	NA	66.6	26.3	118.8629738	2017-08-06	10:42:00	NA	NA	https://storage.googleapis.com/elegansvariation.org/photos/hawaii2017/C-0104.thumb.jpg	Flower
NA	NA	C-0105	NA	No	NA	22.188428	-159.594075	Kauai	Wild forest	Partially Obstructed	no	NA	NA	NA	22.6	35	69.7	28.1	188.5479744	2017-08-06	11:11:00	NA	NA	https://storage.googleapis.com/elegansvariation.org/photos/hawaii2017/C-0105.thumb.jpg	Fruit
NA	NA	C-0106	S-05078	Yes	Few (4-10)	21.387036	-157.805522	Oahu	Rural garden	Partially Obstructed	no	NA	NA	NA	27.3	NA	75.4	27	59.81775701	2017-08-04	10:54:00	NA	NA	https://storage.googleapis.com/elegansvariation.org/photos/hawaii2017/C-0106.thumb.jpg	Fruit
NA	NA	C-0106	S-05079	Yes	Few (4-10)	21.387036	-157.805522	Oahu	Rural garden	Partially Obstructed	no	NA	NA	NA	27.3	NA	75.4	27	59.81775701	2017-08-04	10:54:00	NA	NA	https://storage.googleapis.com/elegansvariation.org/photos/hawaii2017/C-0106.thumb.jpg	Fruit
NA	NA	C-0107	S-05121	Yes	Some (11-25)	22.191986	-159.594322	Kauai	Wild forest	Partially Obstructed	no	NA	NA	NA	24.7	40.5	64.6	27	149.69	2017-08-06	11:02:00	NA	NA	https://storage.googleapis.com/elegansvariation.org/photos/hawaii2017/C-0107.thumb.jpg	Fruit
NA	NA	C-0107	S-05122	Yes	Some (11-25)	22.191986	-159.594322	Kauai	Wild forest	Partially Obstructed	no	NA	NA	NA	24.7	40.5	64.6	27	149.69	2017-08-06	11:02:00	NA	NA	https://storage.googleapis.com/elegansvariation.org/photos/hawaii2017/C-0107.thumb.jpg	Fruit
NA	NA	C-0107	S-05123	Yes	Some (11-25)	22.191986	-159.594322	Kauai	Wild forest	Partially Obstructed	no	NA	NA	NA	24.7	40.5	64.6	27	149.69	2017-08-06	11:02:00	NA	NA	https://storage.googleapis.com/elegansvariation.org/photos/hawaii2017/C-0107.thumb.jpg	Fruit
NA	NA	C-0107	S-05124	Yes	Some (11-25)	22.191986	-159.594322	Kauai	Wild forest	Partially Obstructed	no	NA	NA	NA	24.7	40.5	64.6	27	149.69	2017-08-06	11:02:00	NA	NA	https://storage.googleapis.com/elegansvariation.org/photos/hawaii2017/C-0107.thumb.jpg	Fruit
NA	NA	C-0107	S-05125	Yes	Some (11-25)	22.191986	-159.594322	Kauai	Wild forest	Partially Obstructed	no	NA	NA	NA	24.7	40.5	64.6	27	149.69	2017-08-06	11:02:00	NA	NA	https://storage.googleapis.com/elegansvariation.org/photos/hawaii2017/C-0107.thumb.jpg	Fruit
NA	NA	C-0108	NA	No	NA	22.191953	-159.594275	Kauai	Wild forest	Partially Obstructed	no	NA	NA	NA	25.4	33	68.4	27	151.1386139	2017-08-06	10:46:00	NA	NA	https://storage.googleapis.com/elegansvariation.org/photos/hawaii2017/C-0108.thumb.jpg	Flower
NA	NA	C-0109	S-05270	Yes	Few (4-10)	22.198275	-159.594825	Kauai	Wild forest	Partially Obstructed	no	NA	NA	NA	23.9	35	69.1	26.3	92.03663004	2017-08-06	10:31:00	0	Unknown	https://storage.googleapis.com/elegansvariation.org/photos/hawaii2017/C-0109.thumb.jpg	Leaf litter
NA	NA	C-0109	S-05282	Yes	Few (4-10)	22.198275	-159.594825	Kauai	Wild forest	Partially Obstructed	no	NA	NA	NA	23.9	35	69.1	26.3	92.03663004	2017-08-06	10:31:00	NA	NA	https://storage.googleapis.com/elegansvariation.org/photos/hawaii2017/C-0109.thumb.jpg	Leaf litter
NA	NA	C-0110	S-05131	Yes	Some (11-25)	22.198258	-159.594856	Kauai	Wild forest	Partially Obstructed	no	NA	NA	NA	24.3	54.5	74.1	27	99.68298368	2017-08-06	10:20:00	NA	NA	https://storage.googleapis.com/elegansvariation.org/photos/hawaii2017/C-0110.thumb.jpg	Leaf litter
NA	NA	C-0110	S-05132	Yes	Some (11-25)	22.198258	-159.594856	Kauai	Wild forest	Partially Obstructed	no	NA	NA	NA	24.3	54.5	74.1	27	99.68298368	2017-08-06	10:20:00	NA	NA	https://storage.googleapis.com/elegansvariation.org/photos/hawaii2017/C-0110.thumb.jpg	Leaf litter
NA	NA	C-0110	S-05133	Yes	Some (11-25)	22.198258	-159.594856	Kauai	Wild forest	Partially Obstructed	no	NA	NA	NA	24.3	54.5	74.1	27	99.68298368	2017-08-06	10:20:00	NA	NA	https://storage.googleapis.com/elegansvariation.org/photos/hawaii2017/C-0110.thumb.jpg	Leaf litter
NA	NA	C-0111	NA	No	NA	22.198514	-159.594789	Kauai	Wild forest	Partially Obstructed	no	NA	NA	NA	26.4	NA	75.1	27	102.5972851	2017-08-06	10:18:00	NA	NA	https://storage.googleapis.com/elegansvariation.org/photos/hawaii2017/C-0111.thumb.jpg	Fruit
NA	NA	C-0112	NA	Tracks	NA	22.203839	-159.596392	Kauai	Wild forest	Partially Obstructed	no	NA	NA	NA	25.3	58	80.7	27	68.06237425	2017-08-06	10:06:00	NA	NA	https://storage.googleapis.com/elegansvariation.org/photos/hawaii2017/C-0112.thumb.jpg	Leaf litter
NA	NA	C-0113	S-05137	Yes	Few (4-10)	22.205197	-159.596983	Kauai	Wild forest	Partially Obstructed	no	NA	NA	NA	25.4	47.5	72.9	27	44.3803132	2017-08-06	09:56:00	NA	NA	https://storage.googleapis.com/elegansvariation.org/photos/hawaii2017/C-0113.thumb.jpg	Leaf litter
NA	NA	C-0113	S-05146	Yes	Few (4-10)	22.205197	-159.596983	Kauai	Wild forest	Partially Obstructed	no	NA	NA	NA	25.4	47.5	72.9	27	44.3803132	2017-08-06	09:56:00	0	Unknown	https://storage.googleapis.com/elegansvariation.org/photos/hawaii2017/C-0113.thumb.jpg	Leaf litter
NA	NA	C-0113	S-05154	Yes	Few (4-10)	22.205197	-159.596983	Kauai	Wild forest	Partially Obstructed	no	NA	NA	NA	25.4	47.5	72.9	27	44.3803132	2017-08-06	09:56:00	0	Unknown	https://storage.googleapis.com/elegansvariation.org/photos/hawaii2017/C-0113.thumb.jpg	Leaf litter
NA	NA	C-0114	NA	Tracks	NA	22.206706	-159.597381	Kauai	Wild forest	Partially Obstructed	no	NA	NA	NA	25.1	40	70.7	27	63.18609865	2017-08-06	09:50:00	NA	NA	https://storage.googleapis.com/elegansvariation.org/photos/hawaii2017/C-0114.thumb.jpg	Fruit
NA	NA	C-0115	NA	No	NA	22.207175	-159.597183	Kauai	Wild forest	Partially Obstructed	no	NA	NA	NA	25.9	NA	71.7	27	47.74194336	2017-08-06	09:43:00	NA	NA	https://storage.googleapis.com/elegansvariation.org/photos/hawaii2017/C-0115.thumb.jpg	Flower
NA	NA	C-0116	NA	No	NA	22.207206	-159.597225	Kauai	Wild forest	Obstructed	no	NA	NA	NA	26.5	60	71.1	27	48.61340206	2017-08-06	09:40:00	NA	NA	https://storage.googleapis.com/elegansvariation.org/photos/hawaii2017/C-0116.thumb.jpg	Fruit
NA	NA	C-0117	S-05117	Yes	Few (4-10)	22.211117	-159.595983	Kauai	Wild forest	Partially Obstructed	no	NA	NA	NA	24.6	56.5	70.7	27	79.45764192	2017-08-06	09:35:00	0	Unknown	https://storage.googleapis.com/elegansvariation.org/photos/hawaii2017/C-0117.thumb.jpg	Leaf litter
NA	NA	C-0117	S-05118	Yes	Few (4-10)	22.211117	-159.595983	Kauai	Wild forest	Partially Obstructed	no	NA	NA	NA	24.6	56.5	70.7	27	79.45764192	2017-08-06	09:35:00	0	Unknown	https://storage.googleapis.com/elegansvariation.org/photos/hawaii2017/C-0117.thumb.jpg	Leaf litter
NA	NA	C-0117	S-05169	Yes	Few (4-10)	22.211117	-159.595983	Kauai	Wild forest	Partially Obstructed	no	NA	NA	NA	24.6	56.5	70.7	27	79.45764192	2017-08-06	09:35:00	NA	NA	https://storage.googleapis.com/elegansvariation.org/photos/hawaii2017/C-0117.thumb.jpg	Leaf litter
NA	NA	C-0117	S-05173	Yes	Few (4-10)	22.211117	-159.595983	Kauai	Wild forest	Partially Obstructed	no	NA	NA	NA	24.6	56.5	70.7	27	79.45764192	2017-08-06	09:35:00	NA	NA	https://storage.googleapis.com/elegansvariation.org/photos/hawaii2017/C-0117.thumb.jpg	Leaf litter
NA	NA	C-0117	S-05177	Yes	Few (4-10)	22.211117	-159.595983	Kauai	Wild forest	Partially Obstructed	no	NA	NA	NA	24.6	56.5	70.7	27	79.45764192	2017-08-06	09:35:00	NA	NA	https://storage.googleapis.com/elegansvariation.org/photos/hawaii2017/C-0117.thumb.jpg	Leaf litter
NA	NA	C-0118	NA	No	NA	22.211186	-159.595936	Kauai	Wild forest	Partially Obstructed	no	NA	NA	NA	26.3	NA	68.7	26.3	83.69683258	2017-08-06	09:20:00	NA	NA	https://storage.googleapis.com/elegansvariation.org/photos/hawaii2017/C-0118.thumb.jpg	Fruit
NA	NA	C-0119	S-05136	Yes	Few (4-10)	22.213742	-159.590536	Kauai	Wild forest	Partially Obstructed	no	NA	NA	NA	24.3	47	77.5	25.6	174.2420635	2017-08-06	09:15:00	NA	NA	https://storage.googleapis.com/elegansvariation.org/photos/hawaii2017/C-0119.thumb.jpg	Leaf litter
NA	NA	C-0119	S-05138	Yes	Few (4-10)	22.213742	-159.590536	Kauai	Wild forest	Partially Obstructed	no	NA	NA	NA	24.3	47	77.5	25.6	174.2420635	2017-08-06	09:15:00	NA	NA	https://storage.googleapis.com/elegansvariation.org/photos/hawaii2017/C-0119.thumb.jpg	Leaf litter
NA	NA	C-0119	S-05167	Yes	Few (4-10)	22.213742	-159.590536	Kauai	Wild forest	Partially Obstructed	no	NA	NA	NA	24.3	47	77.5	25.6	174.2420635	2017-08-06	09:15:00	NA	NA	https://storage.googleapis.com/elegansvariation.org/photos/hawaii2017/C-0119.thumb.jpg	Leaf litter
NA	NA	C-0119	S-05171	Yes	Few (4-10)	22.213742	-159.590536	Kauai	Wild forest	Partially Obstructed	no	NA	NA	NA	24.3	47	77.5	25.6	174.2420635	2017-08-06	09:15:00	1	C. briggsae	https://storage.googleapis.com/elegansvariation.org/photos/hawaii2017/C-0119.thumb.jpg	Leaf litter
NA	NA	C-0120	NA	No	NA	22.215311	-159.587769	Kauai	Wild forest	Partially Obstructed	no	NA	NA	NA	24.5	58	75.7	24.3	131.7139875	2017-08-06	08:50:00	NA	NA	https://storage.googleapis.com/elegansvariation.org/photos/hawaii2017/C-0120.thumb.jpg	Fruit
NA	NA	C-0121	NA	No	NA	22.217619	-159.587106	Kauai	Wild forest	Partially Obstructed	no	NA	NA	NA	22.7	22.5	75.6	24.9	153.3314286	2017-08-06	08:39:00	NA	NA	https://storage.googleapis.com/elegansvariation.org/photos/hawaii2017/C-0121.thumb.jpg	Fruit
NA	NA	C-0122	NA	Tracks	NA	22.217614	-159.587122	Kauai	Wild forest	Partially Obstructed	no	NA	NA	NA	25	12.5	73.9	25.6	154.8923358	2017-08-06	08:30:00	NA	NA	https://storage.googleapis.com/elegansvariation.org/photos/hawaii2017/C-0122.thumb.jpg	Fruit
NA	NA	C-0123	S-05179	Yes	Very Few (1-3)	22.219186	-159.584722	Kauai	Wild forest	Partially Obstructed	no	NA	NA	NA	23.5	25.5	76.3	24.9	65.87647059	2017-08-06	08:24:00	NA	NA	https://storage.googleapis.com/elegansvariation.org/photos/hawaii2017/C-0123.thumb.jpg	Leaf litter
NA	NA	C-0123	S-05269	Yes	Very Few (1-3)	22.219186	-159.584722	Kauai	Wild forest	Partially Obstructed	no	NA	NA	NA	23.5	25.5	76.3	24.9	65.87647059	2017-08-06	08:24:00	0	Unknown	https://storage.googleapis.com/elegansvariation.org/photos/hawaii2017/C-0123.thumb.jpg	Leaf litter
NA	NA	C-0124	NA	Tracks	NA	22.151731	-159.621222	Kauai	Wild forest	Partially Obstructed	no	NA	NA	NA	18.2	59.5	70.1	20	1253.463235	2017-08-07	09:42:00	NA	NA	https://storage.googleapis.com/elegansvariation.org/photos/hawaii2017/C-0124.thumb.jpg	Leaf litter
NA	NA	C-0125	S-05126	Yes	Some (11-25)	22.220578	-159.582336	Kauai	Wild forest	Obstructed	no	NA	NA	NA	25.3	38	70.7	26.3	7.566284779	2017-08-06	08:00:00	NA	NA	https://storage.googleapis.com/elegansvariation.org/photos/hawaii2017/C-0125.thumb.jpg	Leaf litter
NA	NA	C-0125	S-05127	Yes	Some (11-25)	22.220578	-159.582336	Kauai	Wild forest	Obstructed	no	NA	NA	NA	25.3	38	70.7	26.3	7.566284779	2017-08-06	08:00:00	1	Oscheius sp.	https://storage.googleapis.com/elegansvariation.org/photos/hawaii2017/C-0125.thumb.jpg	Leaf litter
NA	NA	C-0125	S-05128	Yes	Some (11-25)	22.220578	-159.582336	Kauai	Wild forest	Obstructed	no	NA	NA	NA	25.3	38	70.7	26.3	7.566284779	2017-08-06	08:00:00	NA	NA	https://storage.googleapis.com/elegansvariation.org/photos/hawaii2017/C-0125.thumb.jpg	Leaf litter
NA	NA	C-0125	S-05129	Yes	Some (11-25)	22.220578	-159.582336	Kauai	Wild forest	Obstructed	no	NA	NA	NA	25.3	38	70.7	26.3	7.566284779	2017-08-06	08:00:00	NA	NA	https://storage.googleapis.com/elegansvariation.org/photos/hawaii2017/C-0125.thumb.jpg	Leaf litter
NA	NA	C-0126	NA	No	NA	22.121964	-159.664444	Kauai	Wild forest	Partially Obstructed	yes	4	B	3	15.7	36	71.7	19.5	1117.888889	2017-08-07	08:17:00	NA	NA	https://storage.googleapis.com/elegansvariation.org/photos/hawaii2017/C-0126.thumb.jpg	Leaf litter
NA	NA	C-0127	NA	No	NA	22.121817	-159.664386	Kauai	Wild forest	Partially Obstructed	yes	4	C	2	16.3	41.5	74.5	18.8	1088.623529	2017-08-07	08:20:00	NA	NA	https://storage.googleapis.com/elegansvariation.org/photos/hawaii2017/C-0127.thumb.jpg	Leaf litter
NA	NA	C-0128	NA	No	NA	22.121947	-159.664467	Kauai	Wild forest	Partially Obstructed	yes	4	A	2	15	34	71.2	19.2	1112.384236	2017-08-07	08:13:00	NA	NA	https://storage.googleapis.com/elegansvariation.org/photos/hawaii2017/C-0128.thumb.jpg	Leaf litter
NA	NA	C-0129	NA	Tracks	NA	22.151492	-159.621469	Kauai	Wild forest	Obstructed	no	NA	NA	NA	18.4	40	61.3	22.6	1249.759494	2017-08-07	09:38:00	NA	NA	https://storage.googleapis.com/elegansvariation.org/photos/hawaii2017/C-0129.thumb.jpg	Leaf litter
NA	NA	C-0130	NA	No	NA	22.151486	-159.615089	Kauai	Wild forest	Partially Obstructed	no	NA	NA	NA	19.3	44	65.2	23.3	1230.72973	2017-08-07	10:43:00	NA	NA	https://storage.googleapis.com/elegansvariation.org/photos/hawaii2017/C-0130.thumb.jpg	Leaf litter
NA	NA	C-0131	NA	No	NA	22.149989	-159.622742	Kauai	Wild forest	Partially Obstructed	no	NA	NA	NA	16.7	40	74.4	19.7	1229.134615	2017-08-07	09:25:00	NA	NA	https://storage.googleapis.com/elegansvariation.org/photos/hawaii2017/C-0131.thumb.jpg	Leaf litter
NA	NA	C-0132	NA	No	NA	22.150097	-159.6372	Kauai	Wild forest	Obstructed	no	NA	NA	NA	20.5	50	61.8	23.3	1245.789116	2017-08-07	16:17:00	NA	NA	https://storage.googleapis.com/elegansvariation.org/photos/hawaii2017/C-0132.thumb.jpg	Flower
NA	NA	C-0133	NA	No	NA	22.153286	-159.619542	Kauai	Wild forest	Obstructed	no	NA	NA	NA	19.3	39	72.3	21.6	1265.784615	2017-08-07	09:51:00	NA	NA	https://storage.googleapis.com/elegansvariation.org/photos/hawaii2017/C-0133.thumb.jpg	Leaf litter
NA	NA	C-0134	NA	No	NA	22.151994	-159.615233	Kauai	Wild forest	Obstructed	no	NA	NA	NA	19	60	52.8	23.3	1232.306667	2017-08-07	10:39:00	NA	NA	https://storage.googleapis.com/elegansvariation.org/photos/hawaii2017/C-0134.thumb.jpg	Leaf litter
NA	NA	C-0135	NA	No	NA	22.150256	-159.622492	Kauai	Wild forest	Partially Obstructed	no	NA	NA	NA	18.2	35	69.7	21.9	1231.704545	2017-08-07	09:28:00	NA	NA	https://storage.googleapis.com/elegansvariation.org/photos/hawaii2017/C-0135.thumb.jpg	Leaf litter
NA	NA	C-0136	NA	No	NA	22.147131	-159.616522	Kauai	Wild forest	Partially Obstructed	no	NA	NA	NA	20.1	18	64.8	22.2	1216.013889	2017-08-07	11:17:00	NA	NA	https://storage.googleapis.com/elegansvariation.org/photos/hawaii2017/C-0136.thumb.jpg	Leaf litter
NA	NA	C-0137	NA	No	NA	22.148314	-159.616339	Kauai	Wild forest	Obstructed	no	NA	NA	NA	19.7	49	66.4	21.9	1221.960784	2017-08-07	11:00:00	NA	NA	https://storage.googleapis.com/elegansvariation.org/photos/hawaii2017/C-0137.thumb.jpg	Invertebrate
NA	NA	C-0139	S-05317	Yes	Very Few (1-3)	22.147472	-159.617275	Kauai	Wild forest	Obstructed	no	NA	NA	NA	23.6	68	62.4	24	1223.701149	2017-08-07	11:06:00	NA	NA	https://storage.googleapis.com/elegansvariation.org/photos/hawaii2017/C-0139.thumb.jpg	Invertebrate
NA	NA	C-0140	NA	No	NA	22.146942	-159.613314	Kauai	Wild forest	Obstructed	no	NA	NA	NA	23.9	13	57.1	26	1149.187135	2017-08-07	11:31:00	NA	NA	https://storage.googleapis.com/elegansvariation.org/photos/hawaii2017/C-0140.thumb.jpg	Leaf litter
NA	NA	C-0141	NA	No	NA	22.147194	-159.609069	Kauai	Wild forest	Obstructed	no	NA	NA	NA	20.6	47.5	58.2	26.3	1204.527273	2017-08-07	11:55:00	NA	NA	https://storage.googleapis.com/elegansvariation.org/photos/hawaii2017/C-0141.thumb.jpg	Leaf litter
NA	NA	C-0142	NA	No	NA	22.147297	-159.608128	Kauai	Wild forest	Partially Obstructed	no	NA	NA	NA	21.4	65	60.6	24.9	1250.538462	2017-08-07	12:00:00	NA	NA	https://storage.googleapis.com/elegansvariation.org/photos/hawaii2017/C-0142.thumb.jpg	Leaf litter
NA	NA	C-0143	NA	Tracks	NA	22.148044	-159.604683	Kauai	Wild forest	Obstructed	no	NA	NA	NA	19.7	48.5	60.3	24.8	1243.90991	2017-08-07	12:09:00	NA	NA	https://storage.googleapis.com/elegansvariation.org/photos/hawaii2017/C-0143.thumb.jpg	Leaf litter
NA	NA	C-0144	NA	No	NA	22.149286	-159.615575	Kauai	Wild forest	Obstructed	no	NA	NA	NA	17.7	42.5	75.6	21.5	1226.613636	2017-08-07	10:48:00	NA	NA	https://storage.googleapis.com/elegansvariation.org/photos/hawaii2017/C-0144.thumb.jpg	Invertebrate
NA	NA	C-0145	S-05254	Yes	Very Few (1-3)	22.153006	-159.617131	Kauai	Wild forest	Obstructed	no	NA	NA	NA	17.5	37	64.7	21.2	1261.609375	2017-08-07	10:28:00	NA	NA	https://storage.googleapis.com/elegansvariation.org/photos/hawaii2017/C-0145.thumb.jpg	Leaf litter
NA	NA	C-0146	NA	No	NA	22.151181	-159.621833	Kauai	Wild forest	Obstructed	no	NA	NA	NA	16.4	39	65.4	22.6	1244.088889	2017-08-07	09:32:00	NA	NA	https://storage.googleapis.com/elegansvariation.org/photos/hawaii2017/C-0146.thumb.jpg	Leaf litter
NA	NA	C-0147	S-05242	Yes	Very Few (1-3)	22.148542	-159.625719	Kauai	Wild forest	Partially Obstructed	no	NA	NA	NA	19.2	31	69.5	21.2	1219.882514	2017-08-07	09:13:00	NA	NA	https://storage.googleapis.com/elegansvariation.org/photos/hawaii2017/C-0147.thumb.jpg	Leaf litter
NA	NA	C-0147	S-05261	Yes	Very Few (1-3)	22.148542	-159.625719	Kauai	Wild forest	Partially Obstructed	no	NA	NA	NA	19.2	31	69.5	21.2	1219.882514	2017-08-07	09:13:00	0	Unknown	https://storage.googleapis.com/elegansvariation.org/photos/hawaii2017/C-0147.thumb.jpg	Leaf litter
NA	NA	C-0148	NA	No	NA	22.148386	-159.627419	Kauai	Wild forest	Partially Obstructed	no	NA	NA	NA	17.8	38	66	21.2	1236.231076	2017-08-07	09:08:00	NA	NA	https://storage.googleapis.com/elegansvariation.org/photos/hawaii2017/C-0148.thumb.jpg	Leaf litter
NA	NA	C-0149	NA	Tracks	NA	22.148258	-159.628208	Kauai	Wild forest	Partially Obstructed	no	NA	NA	NA	18.4	46.5	69.1	21	1243.17	2017-08-07	09:04:00	NA	NA	https://storage.googleapis.com/elegansvariation.org/photos/hawaii2017/C-0149.thumb.jpg	Leaf litter
NA	NA	C-0150	NA	No	NA	22.121875	-159.664386	Kauai	Wild forest	Partially Obstructed	yes	4	C	3	16.7	35.5	72.8	18.8	1125.473684	2017-08-07	08:19:00	NA	NA	https://storage.googleapis.com/elegansvariation.org/photos/hawaii2017/C-0150.thumb.jpg	Leaf litter
NA	NA	C-0151	S-05327	Yes	Very Few (1-3)	22.153236	-159.617225	Kauai	Wild forest	Partially Obstructed	no	NA	NA	NA	20	59	65	24	1247.275362	2017-08-07	10:48:00	NA	NA	https://storage.googleapis.com/elegansvariation.org/photos/hawaii2017/C-0151.thumb.jpg	Leaf litter
NA	NA	C-0151	S-05328	Yes	Very Few (1-3)	22.153236	-159.617225	Kauai	Wild forest	Partially Obstructed	no	NA	NA	NA	20	59	65	24	1247.275362	2017-08-07	10:48:00	NA	NA	https://storage.googleapis.com/elegansvariation.org/photos/hawaii2017/C-0151.thumb.jpg	Leaf litter
NA	NA	C-0152	NA	Tracks	NA	22.147536	-159.617267	Kauai	Wild forest	Partially Obstructed	no	NA	NA	NA	23.7	68.5	64.1	24	1214.61194	2017-08-07	11:15:00	NA	NA	https://storage.googleapis.com/elegansvariation.org/photos/hawaii2017/C-0152.thumb.jpg	Leaf litter
NA	NA	C-0153	NA	No	NA	22.152175	-159.600086	Kauai	Wild forest	Full	no	NA	NA	NA	29.1	NA	69.6	23.3	1235.161616	2017-08-07	12:33:00	NA	NA	https://storage.googleapis.com/elegansvariation.org/photos/hawaii2017/C-0153.thumb.jpg	Flower
NA	NA	C-0154	NA	Tracks	NA	22.131372	-159.660394	Kauai	Wild forest	Partially Obstructed	yes	6	A	3	17.7	40.5	77.8	19.5	1155.797101	2017-08-08	08:53:00	NA	NA	https://storage.googleapis.com/elegansvariation.org/photos/hawaii2017/C-0154.thumb.jpg	Leaf litter
NA	NA	C-0155	NA	No	NA	22.145592	-159.646003	Kauai	Wild forest	Full	no	NA	NA	NA	19.2	43	57.4	24.3	1247.178218	2017-08-07	16:21:00	NA	NA	https://storage.googleapis.com/elegansvariation.org/photos/hawaii2017/C-0155.thumb.jpg	Flower
NA	NA	C-0156	S-05165	Yes	Very Few (1-3)	22.106808	-159.672317	Kauai	Wild forest	Obstructed	no	NA	NA	NA	20.8	43	75	23.3	1075.912088	2017-08-07	17:06:00	0	Unknown	https://storage.googleapis.com/elegansvariation.org/photos/hawaii2017/C-0156.thumb.jpg	Leaf litter
NA	NA	C-0156	S-05277	Yes	Very Few (1-3)	22.106808	-159.672317	Kauai	Wild forest	Obstructed	no	NA	NA	NA	20.8	43	75	23.3	1075.912088	2017-08-07	17:06:00	NA	NA	https://storage.googleapis.com/elegansvariation.org/photos/hawaii2017/C-0156.thumb.jpg	Leaf litter
NA	NA	C-0156	S-05289	Yes	Very Few (1-3)	22.106808	-159.672317	Kauai	Wild forest	Obstructed	no	NA	NA	NA	20.8	43	75	23.3	1075.912088	2017-08-07	17:06:00	NA	NA	https://storage.googleapis.com/elegansvariation.org/photos/hawaii2017/C-0156.thumb.jpg	Leaf litter
NA	NA	C-0157	S-05314	Yes	Very Few (1-3)	22.132931	-159.654611	Kauai	Wild forest	Partially Obstructed	no	NA	NA	NA	19.5	53	55	24	1206.432099	2017-08-07	16:33:00	0	Unknown	https://storage.googleapis.com/elegansvariation.org/photos/hawaii2017/C-0157.thumb.jpg	Leaf litter
NA	NA	C-0158	S-05343	Yes	Few (4-10)	22.129519	-159.659722	Kauai	Wild forest	Partially Obstructed	no	NA	NA	NA	17	31	73.6	20.1	1117.980392	2017-08-08	08:35:00	0	Unknown	https://storage.googleapis.com/elegansvariation.org/photos/hawaii2017/C-0158.thumb.jpg	Leaf litter
NA	NA	C-0158	S-05344	Yes	Few (4-10)	22.129519	-159.659722	Kauai	Wild forest	Partially Obstructed	no	NA	NA	NA	17	31	73.6	20.1	1117.980392	2017-08-08	08:35:00	0	Unknown	https://storage.googleapis.com/elegansvariation.org/photos/hawaii2017/C-0158.thumb.jpg	Leaf litter
NA	NA	C-0158	S-05346	Yes	Few (4-10)	22.129519	-159.659722	Kauai	Wild forest	Partially Obstructed	no	NA	NA	NA	17	31	73.6	20.1	1117.980392	2017-08-08	08:35:00	0	Unknown	https://storage.googleapis.com/elegansvariation.org/photos/hawaii2017/C-0158.thumb.jpg	Leaf litter
NA	NA	C-0159	NA	No	NA	22.02581977	-159.6728785	Kauai	Wild forest	Partially Obstructed	no	NA	NA	NA	22.9	NA	62.4	24.9	619	2017-08-08	07:59:00	NA	NA	https://storage.googleapis.com/elegansvariation.org/photos/hawaii2017/C-0159.thumb.jpg	Fruit
NA	NA	C-0160	NA	No	NA	22.150972	-159.601736	Kauai	Wild forest	Partially Obstructed	no	NA	NA	NA	22.7	68.5	67.2	23.3	1235.590164	2017-08-07	12:28:00	NA	NA	https://storage.googleapis.com/elegansvariation.org/photos/hawaii2017/C-0160.thumb.jpg	Leaf litter
NA	NA	C-0161	NA	No	NA	22.148664	-159.604289	Kauai	Wild forest	Partially Obstructed	no	NA	NA	NA	25.9	NA	63.7	26	1227.579365	2017-08-07	12:22:00	NA	NA	https://storage.googleapis.com/elegansvariation.org/photos/hawaii2017/C-0161.thumb.jpg	Fruit
NA	NA	C-0162	NA	Tracks	NA	22.141331	-159.649164	Kauai	Wild forest	Partially Obstructed	no	NA	NA	NA	18.7	61	64.1	22.2	1235.019608	2017-08-08	10:19:00	NA	NA	https://storage.googleapis.com/elegansvariation.org/photos/hawaii2017/C-0162.thumb.jpg	Leaf litter
NA	NA	C-0163	S-05267	Yes	Few (4-10)	22.1068	-159.672317	Kauai	Wild forest	Obstructed	no	NA	NA	NA	19.8	57	67.2	25.3	1075.479452	2017-08-07	17:04:00	0	Unknown	https://storage.googleapis.com/elegansvariation.org/photos/hawaii2017/C-0163.thumb.jpg	Leaf litter
NA	NA	C-0163	S-05271	Yes	Few (4-10)	22.1068	-159.672317	Kauai	Wild forest	Obstructed	no	NA	NA	NA	19.8	57	67.2	25.3	1075.479452	2017-08-07	17:04:00	0	Unknown	https://storage.googleapis.com/elegansvariation.org/photos/hawaii2017/C-0163.thumb.jpg	Leaf litter
NA	NA	C-0163	S-05276	Yes	Few (4-10)	22.1068	-159.672317	Kauai	Wild forest	Obstructed	no	NA	NA	NA	19.8	57	67.2	25.3	1075.479452	2017-08-07	17:04:00	0	Unknown	https://storage.googleapis.com/elegansvariation.org/photos/hawaii2017/C-0163.thumb.jpg	Leaf litter
NA	NA	C-0163	S-05306	Yes	Few (4-10)	22.1068	-159.672317	Kauai	Wild forest	Obstructed	no	NA	NA	NA	19.8	57	67.2	25.3	1075.479452	2017-08-07	17:04:00	0	Unknown	https://storage.googleapis.com/elegansvariation.org/photos/hawaii2017/C-0163.thumb.jpg	Leaf litter
NA	NA	C-0164	NA	Tracks	NA	22.156056	-159.597819	Kauai	Wild forest	Partially Obstructed	no	NA	NA	NA	22	69	65.2	27.4	1236.765625	2017-08-07	12:48:00	NA	NA	https://storage.googleapis.com/elegansvariation.org/photos/hawaii2017/C-0164.thumb.jpg	Leaf litter
NA	NA	C-0165	NA	Tracks	NA	22.148608	-159.604289	Kauai	Wild forest	Partially Obstructed	no	NA	NA	NA	27	69	61.8	24.7	1227.158537	2017-08-07	12:15:00	NA	NA	https://storage.googleapis.com/elegansvariation.org/photos/hawaii2017/C-0165.thumb.jpg	Leaf litter
NA	NA	C-0166	NA	No	NA	22.148064	-159.604775	Kauai	Wild forest	Partially Obstructed	no	NA	NA	NA	21.9	69	60	25.3	1227.614815	2017-08-07	12:09:00	NA	NA	https://storage.googleapis.com/elegansvariation.org/photos/hawaii2017/C-0166.thumb.jpg	Leaf litter
NA	NA	C-0167	NA	No	NA	22.147378	-159.608361	Kauai	Wild forest	Partially Obstructed	no	NA	NA	NA	21.6	70	58.7	25.3	1233.272446	2017-08-07	12:05:00	NA	NA	https://storage.googleapis.com/elegansvariation.org/photos/hawaii2017/C-0167.thumb.jpg	Leaf litter
NA	NA	C-0168	NA	No	NA	22.1471	-159.609392	Kauai	Wild forest	Obstructed	no	NA	NA	NA	18.8	65.5	65.3	25.5	1203.366812	2017-08-07	11:59:00	NA	NA	https://storage.googleapis.com/elegansvariation.org/photos/hawaii2017/C-0168.thumb.jpg	Leaf litter
NA	NA	C-0169	S-05361	Yes	Very Few (1-3)	22.147131	-159.609375	Kauai	Wild forest	Partially Obstructed	no	NA	NA	NA	21.7	NA	63.8	23.3	1199.680556	2017-08-07	11:54:00	0	Unknown	https://storage.googleapis.com/elegansvariation.org/photos/hawaii2017/C-0169.thumb.jpg	Fruit
NA	NA	C-0170	NA	Tracks	NA	22.146197	-159.611217	Kauai	Wild forest	Partially Obstructed	no	NA	NA	NA	21.3	64	65.2	23.3	1187.519737	2017-08-07	11:51:00	NA	NA	https://storage.googleapis.com/elegansvariation.org/photos/hawaii2017/C-0170.thumb.jpg	Leaf litter
NA	NA	C-0171	S-05310	Yes	Some (11-25)	22.146142	-159.611914	Kauai	Wild forest	Partially Obstructed	no	NA	NA	NA	19.7	59	64.9	22.6	1162.78125	2017-08-07	11:45:00	0	Unknown	https://storage.googleapis.com/elegansvariation.org/photos/hawaii2017/C-0171.thumb.jpg	Leaf litter
NA	NA	C-0171	S-05311	Yes	Some (11-25)	22.146142	-159.611914	Kauai	Wild forest	Partially Obstructed	no	NA	NA	NA	19.7	59	64.9	22.6	1162.78125	2017-08-07	11:45:00	0	Unknown	https://storage.googleapis.com/elegansvariation.org/photos/hawaii2017/C-0171.thumb.jpg	Leaf litter
NA	NA	C-0171	S-05312	Yes	Some (11-25)	22.146142	-159.611914	Kauai	Wild forest	Partially Obstructed	no	NA	NA	NA	19.7	59	64.9	22.6	1162.78125	2017-08-07	11:45:00	0	Unknown	https://storage.googleapis.com/elegansvariation.org/photos/hawaii2017/C-0171.thumb.jpg	Leaf litter
NA	NA	C-0171	S-05313	Yes	Some (11-25)	22.146142	-159.611914	Kauai	Wild forest	Partially Obstructed	no	NA	NA	NA	19.7	59	64.9	22.6	1162.78125	2017-08-07	11:45:00	0	Unknown	https://storage.googleapis.com/elegansvariation.org/photos/hawaii2017/C-0171.thumb.jpg	Leaf litter
NA	NA	C-0172	S-05324	Yes	Very Few (1-3)	22.146892	-159.613294	Kauai	Wild forest	Partially Obstructed	no	NA	NA	NA	18.3	69	52.7	27.4	1130.28169	2017-08-07	11:39:00	NA	NA	https://storage.googleapis.com/elegansvariation.org/photos/hawaii2017/C-0172.thumb.jpg	Leaf litter
NA	NA	C-0173	S-05176	Yes	Few (4-10)	22.146903	-159.617336	Kauai	Wild forest	Partially Obstructed	no	NA	NA	NA	20.9	66	62.3	23.6	1206.03871	2017-08-07	11:23:00	NA	NA	https://storage.googleapis.com/elegansvariation.org/photos/hawaii2017/C-0173.thumb.jpg	Leaf litter
NA	NA	C-0173	S-05180	Yes	Few (4-10)	22.146903	-159.617336	Kauai	Wild forest	Partially Obstructed	no	NA	NA	NA	20.9	66	62.3	23.6	1206.03871	2017-08-07	11:23:00	0	Unknown	https://storage.googleapis.com/elegansvariation.org/photos/hawaii2017/C-0173.thumb.jpg	Leaf litter
NA	NA	C-0173	S-05258	Yes	Few (4-10)	22.146903	-159.617336	Kauai	Wild forest	Partially Obstructed	no	NA	NA	NA	20.9	66	62.3	23.6	1206.03871	2017-08-07	11:23:00	NA	NA	https://storage.googleapis.com/elegansvariation.org/photos/hawaii2017/C-0173.thumb.jpg	Leaf litter
NA	NA	C-0174	NA	No	NA	22.149047	-159.615767	Kauai	Wild forest	Partially Obstructed	no	NA	NA	NA	25.3	NA	66.7	23.3	1212.832258	2017-08-07	11:05:00	NA	NA	https://storage.googleapis.com/elegansvariation.org/photos/hawaii2017/C-0174.thumb.jpg	Flower
NA	NA	C-0175	NA	No	NA	22.14965518	-159.6152487	Kauai	Wild forest	Partially Obstructed	no	NA	NA	NA	21.4	NA	65.2	22.6	1213	2017-08-07	10:55:00	NA	NA	https://storage.googleapis.com/elegansvariation.org/photos/hawaii2017/C-0175.thumb.jpg	Fruit
NA	NA	C-0176	NA	No	NA	22.195997	-159.593711	Kauai	Wild forest	Obstructed	no	NA	NA	NA	24.3	10	68.6	27.4	137.2111801	2017-08-06	10:29:00	NA	NA	https://storage.googleapis.com/elegansvariation.org/photos/hawaii2017/C-0176.thumb.jpg	Fruit
NA	NA	C-0177	NA	No	NA	22.188419	-159.594025	Kauai	Wild forest	Partially Obstructed	no	NA	NA	NA	27	39.5	62.3	27.4	188.6079295	2017-08-06	10:48:00	NA	NA	https://storage.googleapis.com/elegansvariation.org/photos/hawaii2017/C-0177.thumb.jpg	Fruit
NA	NA	C-0178	S-05262	Yes	Few (4-10)	22.076153	-159.323025	Kauai	Wild grassland	Partially Obstructed	no	NA	NA	NA	31.2	29.5	55	31	22.74331551	2017-08-06	14:36:00	NA	NA	https://storage.googleapis.com/elegansvariation.org/photos/hawaii2017/C-0178.thumb.jpg	Leaf litter
NA	NA	C-0179	NA	No	NA	22.148514	-159.628947	Kauai	Wild forest	Full	no	NA	NA	NA	19	31	78.4	18.1	1243.208791	2017-08-07	09:01:00	NA	NA	https://storage.googleapis.com/elegansvariation.org/photos/hawaii2017/C-0179.thumb.jpg	Leaf litter
NA	NA	C-0180	S-05273	Yes	Very Few (1-3)	22.200453	-159.595022	Kauai	Wild forest	Obstructed	no	NA	NA	NA	24.7	37	73	27.4	95.31838565	2017-08-06	10:17:00	NA	NA	https://storage.googleapis.com/elegansvariation.org/photos/hawaii2017/C-0180.thumb.jpg	Fruit
NA	NA	C-0181	NA	Tracks	NA	22.117747	-159.300636	Kauai	Wild grassland	Partially Obstructed	no	NA	NA	NA	29.3	27	54.1	31	48.2375	2017-08-06	14:24:00	NA	NA	https://storage.googleapis.com/elegansvariation.org/photos/hawaii2017/C-0181.thumb.jpg	Leaf litter
NA	NA	C-0182	S-05152	Yes	Proliferating (25+)	22.207692	-159.597203	Kauai	Wild forest	Full	no	NA	NA	NA	25.9	59.5	77.3	27.4	25.68332683	2017-08-06	09:37:00	NA	NA	https://storage.googleapis.com/elegansvariation.org/photos/hawaii2017/C-0182.thumb.jpg	Fruit
NA	NA	C-0182	S-05156	Yes	Proliferating (25+)	22.207692	-159.597203	Kauai	Wild forest	Full	no	NA	NA	NA	25.9	59.5	77.3	27.4	25.68332683	2017-08-06	09:37:00	NA	NA	https://storage.googleapis.com/elegansvariation.org/photos/hawaii2017/C-0182.thumb.jpg	Fruit
NA	NA	C-0182	S-05178	Yes	Proliferating (25+)	22.207692	-159.597203	Kauai	Wild forest	Full	no	NA	NA	NA	25.9	59.5	77.3	27.4	25.68332683	2017-08-06	09:37:00	NA	NA	https://storage.googleapis.com/elegansvariation.org/photos/hawaii2017/C-0182.thumb.jpg	Fruit
NA	NA	C-0183	NA	No	NA	22.216108	-159.588044	Kauai	Wild forest	Partially Obstructed	no	NA	NA	NA	22.5	22	74	27.4	149.0107527	2017-08-06	08:40:00	NA	NA	https://storage.googleapis.com/elegansvariation.org/photos/hawaii2017/C-0183.thumb.jpg	Fruit
NA	NA	C-0184	NA	No	NA	22.214086000000002	-159.589864	Kauai	Wild forest	Partially Obstructed	no	NA	NA	NA	22.3	60	76.8	25.3	202.6699507	2017-08-06	08:53:00	NA	NA	https://storage.googleapis.com/elegansvariation.org/photos/hawaii2017/C-0184.thumb.jpg	Fruit
NA	NA	C-0185	S-05142	Yes	Very Few (1-3)	22.217458	-159.585581	Kauai	Wild forest	Partially Obstructed	no	NA	NA	NA	23.2	49.2	60.5	30.2	181.6127168	2017-08-06	08:26:00	NA	NA	https://storage.googleapis.com/elegansvariation.org/photos/hawaii2017/C-0185.thumb.jpg	Vegetation
NA	NA	C-0186	S-05149	Yes	Proliferating (25+)	22.202353	-159.498467	Kauai	Wild forest	Full	no	NA	NA	NA	27.6	39	61.8	28.8	14.81182796	2017-08-06	13:46:00	NA	NA	https://storage.googleapis.com/elegansvariation.org/photos/hawaii2017/C-0186.thumb.jpg	Leaf litter
NA	NA	C-0186	S-05150	Yes	Proliferating (25+)	22.202353	-159.498467	Kauai	Wild forest	Full	no	NA	NA	NA	27.6	39	61.8	28.8	14.81182796	2017-08-06	13:46:00	1	C. kamaaina	https://storage.googleapis.com/elegansvariation.org/photos/hawaii2017/C-0186.thumb.jpg	Leaf litter
NA	NA	C-0186	S-05157	Yes	Proliferating (25+)	22.202353	-159.498467	Kauai	Wild forest	Full	no	NA	NA	NA	27.6	39	61.8	28.8	14.81182796	2017-08-06	13:46:00	NA	NA	https://storage.googleapis.com/elegansvariation.org/photos/hawaii2017/C-0186.thumb.jpg	Leaf litter
NA	NA	C-0186	S-05166	Yes	Proliferating (25+)	22.202353	-159.498467	Kauai	Wild forest	Full	no	NA	NA	NA	27.6	39	61.8	28.8	14.81182796	2017-08-06	13:46:00	1	C. kamaaina	https://storage.googleapis.com/elegansvariation.org/photos/hawaii2017/C-0186.thumb.jpg	Leaf litter
NA	NA	C-0186	S-05170	Yes	Proliferating (25+)	22.202353	-159.498467	Kauai	Wild forest	Full	no	NA	NA	NA	27.6	39	61.8	28.8	14.81182796	2017-08-06	13:46:00	NA	NA	https://storage.googleapis.com/elegansvariation.org/photos/hawaii2017/C-0186.thumb.jpg	Leaf litter
NA	NA	C-0186	S-05174	Yes	Proliferating (25+)	22.202353	-159.498467	Kauai	Wild forest	Full	no	NA	NA	NA	27.6	39	61.8	28.8	14.81182796	2017-08-06	13:46:00	NA	NA	https://storage.googleapis.com/elegansvariation.org/photos/hawaii2017/C-0186.thumb.jpg	Leaf litter
NA	NA	C-0187	NA	No	NA	22.211747	-159.592897	Kauai	Wild forest	Partially Obstructed	no	NA	NA	NA	24	NA	76.6	26	151.2128028	2017-08-06	09:06:00	NA	NA	https://storage.googleapis.com/elegansvariation.org/photos/hawaii2017/C-0187.thumb.jpg	Flower
NA	NA	C-0188	S-05134	Yes	Proliferating (25+)	22.21465	-159.535122	Kauai	Wild forest	Full	no	NA	NA	NA	27.3	35	62.8	29.5	29.81069519	2017-08-06	13:34:00	NA	NA	https://storage.googleapis.com/elegansvariation.org/photos/hawaii2017/C-0188.thumb.jpg	Leaf litter
NA	NA	C-0188	S-05135	Yes	Proliferating (25+)	22.21465	-159.535122	Kauai	Wild forest	Full	no	NA	NA	NA	27.3	35	62.8	29.5	29.81069519	2017-08-06	13:34:00	NA	NA	https://storage.googleapis.com/elegansvariation.org/photos/hawaii2017/C-0188.thumb.jpg	Leaf litter
NA	NA	C-0188	S-05160	Yes	Proliferating (25+)	22.21465	-159.535122	Kauai	Wild forest	Full	no	NA	NA	NA	27.3	35	62.8	29.5	29.81069519	2017-08-06	13:34:00	0	Unknown	https://storage.googleapis.com/elegansvariation.org/photos/hawaii2017/C-0188.thumb.jpg	Leaf litter
NA	NA	C-0188	S-05163	Yes	Proliferating (25+)	22.21465	-159.535122	Kauai	Wild forest	Full	no	NA	NA	NA	27.3	35	62.8	29.5	29.81069519	2017-08-06	13:34:00	0	Unknown	https://storage.googleapis.com/elegansvariation.org/photos/hawaii2017/C-0188.thumb.jpg	Leaf litter
NA	NA	C-0188	S-05164	Yes	Proliferating (25+)	22.21465	-159.535122	Kauai	Wild forest	Full	no	NA	NA	NA	27.3	35	62.8	29.5	29.81069519	2017-08-06	13:34:00	0	Unknown	https://storage.googleapis.com/elegansvariation.org/photos/hawaii2017/C-0188.thumb.jpg	Leaf litter
NA	NA	C-0188	S-05168	Yes	Proliferating (25+)	22.21465	-159.535122	Kauai	Wild forest	Full	no	NA	NA	NA	27.3	35	62.8	29.5	29.81069519	2017-08-06	13:34:00	0	Unknown	https://storage.googleapis.com/elegansvariation.org/photos/hawaii2017/C-0188.thumb.jpg	Leaf litter
NA	NA	C-0189	S-05181	Yes	Few (4-10)	22.211489	-159.469825	Kauai	Wild forest	Obstructed	no	NA	NA	NA	24.5	37	61.7	30.2	106.9686411	2017-08-06	13:59:00	NA	NA	https://storage.googleapis.com/elegansvariation.org/photos/hawaii2017/C-0189.thumb.jpg	Leaf litter
NA	NA	C-0189	S-05182	Yes	Few (4-10)	22.211489	-159.469825	Kauai	Wild forest	Obstructed	no	NA	NA	NA	24.5	37	61.7	30.2	106.9686411	2017-08-06	13:59:00	0	Unknown	https://storage.googleapis.com/elegansvariation.org/photos/hawaii2017/C-0189.thumb.jpg	Leaf litter
NA	NA	C-0189	S-05183	Yes	Few (4-10)	22.211489	-159.469825	Kauai	Wild forest	Obstructed	no	NA	NA	NA	24.5	37	61.7	30.2	106.9686411	2017-08-06	13:59:00	NA	NA	https://storage.googleapis.com/elegansvariation.org/photos/hawaii2017/C-0189.thumb.jpg	Leaf litter
NA	NA	C-0189	S-05184	Yes	Few (4-10)	22.211489	-159.469825	Kauai	Wild forest	Obstructed	no	NA	NA	NA	24.5	37	61.7	30.2	106.9686411	2017-08-06	13:59:00	0	Unknown	https://storage.googleapis.com/elegansvariation.org/photos/hawaii2017/C-0189.thumb.jpg	Leaf litter
NA	NA	C-0190	S-05139	Yes	Very Few (1-3)	22.171433	-159.326181	Kauai	Wild forest	Partially Obstructed	no	NA	NA	NA	25.1	38	57.9	30.2	62.32258065	2017-08-06	14:14:00	0	Unknown	https://storage.googleapis.com/elegansvariation.org/photos/hawaii2017/C-0190.thumb.jpg	Leaf litter
NA	NA	C-0190	S-05143	Yes	Very Few (1-3)	22.171433	-159.326181	Kauai	Wild forest	Partially Obstructed	no	NA	NA	NA	25.1	38	57.9	30.2	62.32258065	2017-08-06	14:14:00	NA	NA	https://storage.googleapis.com/elegansvariation.org/photos/hawaii2017/C-0190.thumb.jpg	Leaf litter
NA	NA	C-0191	NA	Tracks	NA	22.201536	-159.402975	Kauai	Wild grassland	Partially Obstructed	no	NA	NA	NA	26.9	14.5	59.6	28.8	110.0071429	2017-08-06	14:02:00	NA	NA	https://storage.googleapis.com/elegansvariation.org/photos/hawaii2017/C-0191.thumb.jpg	Leaf litter
NA	NA	C-0192	S-05140	Yes	Very Few (1-3)	22.211278	-159.475858	Kauai	Wild forest	Partially Obstructed	no	NA	NA	NA	29	34	62.8	29.5	26.45977597	2017-08-06	13:54:00	0	Unknown	https://storage.googleapis.com/elegansvariation.org/photos/hawaii2017/C-0192.thumb.jpg	Leaf litter
NA	NA	C-0192	S-05147	Yes	Very Few (1-3)	22.211278	-159.475858	Kauai	Wild forest	Partially Obstructed	no	NA	NA	NA	29	34	62.8	29.5	26.45977597	2017-08-06	13:54:00	0	Unknown	https://storage.googleapis.com/elegansvariation.org/photos/hawaii2017/C-0192.thumb.jpg	Leaf litter
NA	NA	C-0192	S-05151	Yes	Very Few (1-3)	22.211278	-159.475858	Kauai	Wild forest	Partially Obstructed	no	NA	NA	NA	29	34	62.8	29.5	26.45977597	2017-08-06	13:54:00	0	Unknown	https://storage.googleapis.com/elegansvariation.org/photos/hawaii2017/C-0192.thumb.jpg	Leaf litter
NA	NA	C-0193	NA	No	NA	22.147853	-159.63105	Kauai	Wild forest	Partially Obstructed	no	NA	NA	NA	18.2	NA	77	18.1	1269.45122	2017-08-07	08:54:00	NA	NA	https://storage.googleapis.com/elegansvariation.org/photos/hawaii2017/C-0193.thumb.jpg	Flower
NA	NA	C-0194	NA	No	NA	22.1959	-159.593669	Kauai	Wild forest	Obstructed	no	NA	NA	NA	24.5	38.5	68.9	27.4	138.6915423	2017-08-06	10:43:00	NA	NA	https://storage.googleapis.com/elegansvariation.org/photos/hawaii2017/C-0194.thumb.jpg	Fruit
NA	NA	C-0195	S-05144	Yes	Few (4-10)	22.003719	-159.346928	Kauai	Wild grassland	Partially Obstructed	no	NA	NA	NA	NA	NA	46.8	33.6	27.22163588	2017-08-06	14:49:00	0	Unknown	https://storage.googleapis.com/elegansvariation.org/photos/hawaii2017/C-0195.thumb.jpg	Flower
NA	NA	C-0195	S-05148	Yes	Few (4-10)	22.003719	-159.346928	Kauai	Wild grassland	Partially Obstructed	no	NA	NA	NA	NA	NA	46.8	33.6	27.22163588	2017-08-06	14:49:00	0	Unknown	https://storage.googleapis.com/elegansvariation.org/photos/hawaii2017/C-0195.thumb.jpg	Flower
NA	NA	C-0196	NA	No	NA	22.200444	-159.594958	Kauai	Wild forest	Obstructed	no	NA	NA	NA	25	49.5	73.5	28.1	93.55530973	2017-08-06	10:09:00	NA	NA	https://storage.googleapis.com/elegansvariation.org/photos/hawaii2017/C-0196.thumb.jpg	Fruit
NA	NA	C-0197	NA	No	NA	22.203128	-159.595942	Kauai	Wild forest	Obstructed	NA	NA	NA	NA	23.8	55.5	71.5	27.4	66.14485981	2017-08-06	09:58:00	NA	NA	https://storage.googleapis.com/elegansvariation.org/photos/hawaii2017/C-0197.thumb.jpg	Fruit
NA	NA	C-0198	S-05161	Yes	Very Few (1-3)	22.207494	-159.597147	Kauai	Wild forest	Obstructed	no	NA	NA	NA	26.4	58	68.6	28.1	30.1610338	2017-08-06	09:46:00	NA	NA	https://storage.googleapis.com/elegansvariation.org/photos/hawaii2017/C-0198.thumb.jpg	Fruit
NA	NA	C-0199	NA	Tracks	NA	22.214272	-159.589703	Kauai	Wild forest	Obstructed	no	NA	NA	NA	22.3	58.5	79	26	182.8086957	2017-08-06	08:49:00	NA	NA	https://storage.googleapis.com/elegansvariation.org/photos/hawaii2017/C-0199.thumb.jpg	Fruit
NA	NA	C-0200	NA	No	NA	22.219217	-159.584811	Kauai	Wild forest	Full	no	NA	NA	NA	27.6	68.1	27.4	27.4	52.7700831	2017-08-06	08:14:00	NA	NA	https://storage.googleapis.com/elegansvariation.org/photos/hawaii2017/C-0200.thumb.jpg	Fruit
NA	NA	C-0201	NA	No	NA	22.219175	-159.584769	Kauai	Wild forest	Partially Obstructed	no	NA	NA	NA	26.5	22.5	70.7	26.3	72.42944785	2017-08-06	08:15:00	NA	NA	https://storage.googleapis.com/elegansvariation.org/photos/hawaii2017/C-0201.thumb.jpg	Fruit
NA	NA	C-0202	S-05172	Yes	Very Few (1-3)	22.217519	-159.585814	Kauai	Wild forest	Partially Obstructed	no	NA	NA	NA	23.6	22.5	76.3	25.6	105.8840304	2017-08-06	08:26:00	0	Unknown	https://storage.googleapis.com/elegansvariation.org/photos/hawaii2017/C-0202.thumb.jpg	Leaf litter
NA	NA	C-0203	NA	No	NA	22.215442	-159.587789	Kauai	Wild forest	Partially Obstructed	no	NA	NA	NA	22.7	30	76.6	26.2	147.251462	2017-08-06	08:38:00	NA	NA	https://storage.googleapis.com/elegansvariation.org/photos/hawaii2017/C-0203.thumb.jpg	Flower
NA	NA	C-0204	S-05141	Yes	Few (4-10)	22.214653	-159.589208	Kauai	Wild forest	Partially Obstructed	no	NA	NA	NA	22.5	40	81.3	24.3	188.7604396	2017-08-06	08:46:00	0	Unknown	https://storage.googleapis.com/elegansvariation.org/photos/hawaii2017/C-0204.thumb.jpg	Leaf litter
NA	NA	C-0204	S-05145	Yes	Few (4-10)	22.214653	-159.589208	Kauai	Wild forest	Partially Obstructed	no	NA	NA	NA	22.5	40	81.3	24.3	188.7604396	2017-08-06	08:46:00	1	Oscheius sp.	https://storage.googleapis.com/elegansvariation.org/photos/hawaii2017/C-0204.thumb.jpg	Leaf litter
NA	NA	C-0204	S-05153	Yes	Few (4-10)	22.214653	-159.589208	Kauai	Wild forest	Partially Obstructed	no	NA	NA	NA	22.5	40	81.3	24.3	188.7604396	2017-08-06	08:46:00	NA	NA	https://storage.googleapis.com/elegansvariation.org/photos/hawaii2017/C-0204.thumb.jpg	Leaf litter
NA	NA	C-0204	S-05162	Yes	Few (4-10)	22.214653	-159.589208	Kauai	Wild forest	Partially Obstructed	no	NA	NA	NA	22.5	40	81.3	24.3	188.7604396	2017-08-06	08:46:00	NA	NA	https://storage.googleapis.com/elegansvariation.org/photos/hawaii2017/C-0204.thumb.jpg	Leaf litter
NA	NA	C-0205	NA	No	NA	22.211811	-159.592808	Kauai	Wild forest	Partially Obstructed	no	NA	NA	NA	23.5	58.5	78.6	24.9	137.2845528	2017-08-06	09:05:00	NA	NA	https://storage.googleapis.com/elegansvariation.org/photos/hawaii2017/C-0205.thumb.jpg	Flower
NA	NA	C-0206	NA	No	NA	22.210017	-159.596422	Kauai	Wild forest	Partially Obstructed	no	NA	NA	NA	25.7	39	74.7	25.7	53.4009434	2017-08-06	09:24:00	NA	NA	https://storage.googleapis.com/elegansvariation.org/photos/hawaii2017/C-0206.thumb.jpg	Fruit
NA	NA	C-0207	NA	Tracks	NA	22.207375	-159.597194	Kauai	Wild forest	Partially Obstructed	no	NA	NA	NA	31.3	56	64	29.5	44.65539452	2017-08-06	09:41:00	NA	NA	https://storage.googleapis.com/elegansvariation.org/photos/hawaii2017/C-0207.thumb.jpg	Fruit
NA	NA	C-0208	NA	No	NA	22.207722	-159.597425	Kauai	Wild forest	Partially Obstructed	no	NA	NA	NA	25.9	60	71.7	27	43.03271538	2017-08-06	09:37:00	NA	NA	https://storage.googleapis.com/elegansvariation.org/photos/hawaii2017/C-0208.thumb.jpg	Fruit
NA	NA	C-0209	NA	No	NA	22.206228	-159.597442	Kauai	Wild forest	Partially Obstructed	no	NA	NA	NA	27.1	59	71.7	27	1.56573499	2017-08-06	09:47:00	NA	NA	https://storage.googleapis.com/elegansvariation.org/photos/hawaii2017/C-0209.thumb.jpg	Fruit
NA	NA	C-0210	NA	No	NA	22.20465	-159.596519	Kauai	Wild forest	Partially Obstructed	no	NA	NA	NA	25.1	59.6	72.9	27	64.48388672	2017-08-06	09:53:00	NA	NA	https://storage.googleapis.com/elegansvariation.org/photos/hawaii2017/C-0210.thumb.jpg	Fruit
NA	NA	C-0211	S-05245	Yes	Few (4-10)	22.203142	-159.595944	Kauai	Wild forest	Partially Obstructed	no	NA	NA	NA	25.3	55.5	72.9	27	64.49236641	2017-08-06	09:59:00	NA	NA	https://storage.googleapis.com/elegansvariation.org/photos/hawaii2017/C-0211.thumb.jpg	Leaf litter
NA	NA	C-0211	S-05249	Yes	Few (4-10)	22.203142	-159.595944	Kauai	Wild forest	Partially Obstructed	no	NA	NA	NA	25.3	55.5	72.9	27	64.49236641	2017-08-06	09:59:00	NA	NA	https://storage.googleapis.com/elegansvariation.org/photos/hawaii2017/C-0211.thumb.jpg	Leaf litter
NA	NA	C-0211	S-05281	Yes	Few (4-10)	22.203142	-159.595944	Kauai	Wild forest	Partially Obstructed	no	NA	NA	NA	25.3	55.5	72.9	27	64.49236641	2017-08-06	09:59:00	0	Unknown	https://storage.googleapis.com/elegansvariation.org/photos/hawaii2017/C-0211.thumb.jpg	Leaf litter
NA	NA	C-0211	S-05285	Yes	Few (4-10)	22.203142	-159.595944	Kauai	Wild forest	Partially Obstructed	no	NA	NA	NA	25.3	55.5	72.9	27	64.49236641	2017-08-06	09:59:00	NA	NA	https://storage.googleapis.com/elegansvariation.org/photos/hawaii2017/C-0211.thumb.jpg	Leaf litter
NA	NA	C-0212	NA	No	NA	22.153225	-159.619678	Kauai	Wild forest	Partially Obstructed	no	NA	NA	NA	18.6	58	72.3	21.9	1256.099448	2017-08-07	09:57:00	NA	NA	https://storage.googleapis.com/elegansvariation.org/photos/hawaii2017/C-0212.thumb.jpg	Leaf litter
NA	NA	C-0213	NA	No	NA	22.1479449	-159.6306944	Kauai	Wild forest	Full	no	NA	NA	NA	19.3	59	76.1	18.8	1235	2017-08-07	09:05:00	NA	NA	https://storage.googleapis.com/elegansvariation.org/photos/hawaii2017/C-0213.thumb.jpg	Leaf litter
NA	NA	C-0214	NA	No	NA	22.151697	-159.621175	Kauai	Wild forest	Partially Obstructed	no	NA	NA	NA	17.4	45	72.3	21.2	1245.914634	2017-08-07	09:48:00	NA	NA	https://storage.googleapis.com/elegansvariation.org/photos/hawaii2017/C-0214.thumb.jpg	Leaf litter
NA	NA	C-0215	NA	No	NA	22.190778	-159.593939	Kauai	Wild forest	Partially Obstructed	no	NA	NA	NA	24.7	39.5	62.5	28.8	134.3811659	2017-08-06	10:51:00	NA	NA	https://storage.googleapis.com/elegansvariation.org/photos/hawaii2017/C-0215.thumb.jpg	Fruit
NA	NA	C-0216	S-05352	Yes	Very Few (1-3)	22.15325	-159.617156	Kauai	Wild forest	Partially Obstructed	no	NA	NA	NA	18.7	60	67.4	21.9	1251.40099	2017-08-07	10:25:00	NA	NA	https://storage.googleapis.com/elegansvariation.org/photos/hawaii2017/C-0216.thumb.jpg	Leaf litter
NA	NA	C-0217	S-05130	Yes	Few (4-10)	22.199528	-159.594633	Kauai	Wild forest	Partially Obstructed	no	NA	NA	NA	25.8	NA	71.7	27.7	81.01867572	2017-08-06	10:14:00	NA	NA	https://storage.googleapis.com/elegansvariation.org/photos/hawaii2017/C-0217.thumb.jpg	Flower
NA	NA	C-0217	S-05158	Yes	Few (4-10)	22.199528	-159.594633	Kauai	Wild forest	Partially Obstructed	no	NA	NA	NA	25.8	NA	71.7	27.7	81.01867572	2017-08-06	10:14:00	NA	NA	https://storage.googleapis.com/elegansvariation.org/photos/hawaii2017/C-0217.thumb.jpg	Flower
NA	NA	C-0218	S-05155	Yes	Some (11-25)	22.200481	-159.595008	Kauai	Wild forest	Partially Obstructed	no	NA	NA	NA	25.3	60	76.4	27	87.59851301	2017-08-06	10:09:00	NA	NA	https://storage.googleapis.com/elegansvariation.org/photos/hawaii2017/C-0218.thumb.jpg	Fruit
NA	NA	C-0218	S-05159	Yes	Some (11-25)	22.200481	-159.595008	Kauai	Wild forest	Partially Obstructed	no	NA	NA	NA	25.3	60	76.4	27	87.59851301	2017-08-06	10:09:00	NA	NA	https://storage.googleapis.com/elegansvariation.org/photos/hawaii2017/C-0218.thumb.jpg	Fruit
NA	NA	C-0219	NA	No	NA	22.151119	-159.6217	Kauai	Wild forest	Partially Obstructed	no	NA	NA	NA	18.9	59	72.7	20.1	1249.674699	2017-08-07	09:37:00	NA	NA	https://storage.googleapis.com/elegansvariation.org/photos/hawaii2017/C-0219.thumb.jpg	Leaf litter
NA	NA	C-0220	NA	No	NA	22.198578	-159.594708	Kauai	Wild forest	Partially Obstructed	no	NA	NA	NA	26.8	39.5	76.5	28.1	117.2506739	2017-08-06	10:19:00	NA	NA	https://storage.googleapis.com/elegansvariation.org/photos/hawaii2017/C-0220.thumb.jpg	Fruit
NA	NA	C-0221	S-05175	Yes	Few (4-10)	22.201019	-159.595147	Kauai	Wild forest	Partially Obstructed	no	NA	NA	NA	23.8	26	71.1	27.4	103.1527094	2017-08-06	10:05:00	0	Unknown	https://storage.googleapis.com/elegansvariation.org/photos/hawaii2017/C-0221.thumb.jpg	Flower
NA	NA	C-0222	NA	No	NA	22.193964	-159.593681	Kauai	Wild forest	Partially Obstructed	no	NA	NA	NA	24.7	31	67	27.4	117.6340909	2017-08-06	10:37:00	NA	NA	https://storage.googleapis.com/elegansvariation.org/photos/hawaii2017/C-0222.thumb.jpg	Flower
NA	NA	C-0223	S-05274	Yes	Very Few (1-3)	22.219269	-159.583939	Kauai	Wild forest	Partially Obstructed	no	NA	NA	NA	23.4	58.5	64.6	26.3	64.78546713	2017-08-06	08:10:00	1	C. briggsae	https://storage.googleapis.com/elegansvariation.org/photos/hawaii2017/C-0223.thumb.jpg	Leaf litter
NA	NA	C-0223	S-05278	Yes	Very Few (1-3)	22.219269	-159.583939	Kauai	Wild forest	Partially Obstructed	no	NA	NA	NA	23.4	58.5	64.6	26.3	64.78546713	2017-08-06	08:10:00	0	Unknown	https://storage.googleapis.com/elegansvariation.org/photos/hawaii2017/C-0223.thumb.jpg	Leaf litter
NA	NA	C-0224	S-05331	Yes	Very Few (1-3)	22.121633	-159.664956	Kauai	Wild forest	Partially Obstructed	no	NA	NA	NA	17.9	53.5	80.4	18.1	1116.630631	2017-08-07	08:33:00	0	Unknown	https://storage.googleapis.com/elegansvariation.org/photos/hawaii2017/C-0224.thumb.jpg	Leaf litter
NA	NA	C-0224	S-05332	Yes	Very Few (1-3)	22.121633	-159.664956	Kauai	Wild forest	Partially Obstructed	no	NA	NA	NA	17.9	53.5	80.4	18.1	1116.630631	2017-08-07	08:33:00	0	Unknown	https://storage.googleapis.com/elegansvariation.org/photos/hawaii2017/C-0224.thumb.jpg	Leaf litter
NA	NA	C-0225	S-05253	Yes	Some (11-25)	22.195656	-159.594178	Kauai	Wild forest	Partially Obstructed	no	NA	NA	NA	23.9	38	72.4	27	110.4703557	2017-08-06	10:30:00	1	Oscheius sp.	https://storage.googleapis.com/elegansvariation.org/photos/hawaii2017/C-0225.thumb.jpg	Fruit
NA	NA	C-0225	S-05257	Yes	Some (11-25)	22.195656	-159.594178	Kauai	Wild forest	Partially Obstructed	no	NA	NA	NA	23.9	38	72.4	27	110.4703557	2017-08-06	10:30:00	1	Oscheius sp.	https://storage.googleapis.com/elegansvariation.org/photos/hawaii2017/C-0225.thumb.jpg	Fruit
NA	NA	C-0226	NA	No	NA	22.15699653	-159.6239042	Kauai	Wild forest	Partially Obstructed	no	NA	NA	NA	NA	20	43.3	29.5	813	2017-08-08	12:03:00	NA	NA	https://storage.googleapis.com/elegansvariation.org/photos/hawaii2017/C-0226.thumb.jpg	Flower
NA	NA	C-0227	NA	No	NA	22.15699653	-159.6239042	Kauai	Wild forest	Partially Obstructed	no	NA	NA	NA	22.4	NA	40.7	34.3	813	2017-08-08	12:32:00	NA	NA	https://storage.googleapis.com/elegansvariation.org/photos/hawaii2017/C-0227.thumb.jpg	Invertebrate
NA	NA	C-0228	NA	No	NA	22.133923	-159.641155	Kauai	Wild forest	Partially Obstructed	no	NA	NA	NA	21	18.8	56.4	23.3	1157	2017-08-08	13:34:00	NA	NA	https://storage.googleapis.com/elegansvariation.org/photos/hawaii2017/C-0228.thumb.jpg	Fungus
NA	NA	C-0229	NA	Tracks	NA	22.1499193	-159.6421812	Kauai	Wild forest	Partially Obstructed	no	NA	NA	NA	17.5	38	79.5	19.2	1253	2017-08-08	09:42:00	NA	NA	https://storage.googleapis.com/elegansvariation.org/photos/hawaii2017/C-0229.thumb.jpg	Leaf litter
NA	NA	C-0230	S-05463	Yes	Very Few (1-3)	22.15028957	-159.6423375	Kauai	Wild forest	Partially Obstructed	no	NA	NA	NA	18	33	71.4	21.2	1253	2017-08-08	09:51:00	NA	NA	https://storage.googleapis.com/elegansvariation.org/photos/hawaii2017/C-0230.thumb.jpg	Leaf litter
NA	NA	C-0231	S-05469	Yes	Proliferating (25+)	22.15107135	-159.6460699	Kauai	Wild forest	Partially Obstructed	no	NA	NA	NA	16.6	38	70.7	21.27777777777778	1255	2017-08-08	09:10:00	NA	NA	https://storage.googleapis.com/elegansvariation.org/photos/hawaii2017/C-0231.thumb.jpg	Leaf litter
NA	NA	C-0231	S-05470	Yes	Proliferating (25+)	22.15107135	-159.6460699	Kauai	Wild forest	Partially Obstructed	no	NA	NA	NA	16.6	38	70.7	21.27777777777778	1255	2017-08-08	09:10:00	NA	NA	https://storage.googleapis.com/elegansvariation.org/photos/hawaii2017/C-0231.thumb.jpg	Leaf litter
NA	NA	C-0231	S-05476	Yes	Proliferating (25+)	22.15107135	-159.6460699	Kauai	Wild forest	Partially Obstructed	no	NA	NA	NA	16.6	38	70.7	21.27777777777778	1255	2017-08-08	09:10:00	0	Unknown	https://storage.googleapis.com/elegansvariation.org/photos/hawaii2017/C-0231.thumb.jpg	Leaf litter
NA	NA	C-0232	S-05522	Yes	Few (4-10)	22.14512	-159.640055	Kauai	Wild forest	Partially Obstructed	no	NA	NA	NA	18.1	36	61.4	23.3	1266	2017-08-08	10:50:00	0	Unknown	https://storage.googleapis.com/elegansvariation.org/photos/hawaii2017/C-0232.thumb.jpg	Leaf litter
NA	NA	C-0232	S-05523	Yes	Few (4-10)	22.14512	-159.640055	Kauai	Wild forest	Partially Obstructed	no	NA	NA	NA	18.1	36	61.4	23.3	1266	2017-08-08	10:50:00	NA	NA	https://storage.googleapis.com/elegansvariation.org/photos/hawaii2017/C-0232.thumb.jpg	Leaf litter
NA	NA	C-0233	S-05348	Yes	Very Few (1-3)	22.136639	-159.641075	Kauai	Wild forest	Partially Obstructed	no	NA	NA	NA	17.7	48	61.4	23.3	1156.144231	2017-08-08	13:50:00	NA	NA	https://storage.googleapis.com/elegansvariation.org/photos/hawaii2017/C-0233.thumb.jpg	Leaf litter
NA	NA	C-0233	S-05349	Yes	Very Few (1-3)	22.136639	-159.641075	Kauai	Wild forest	Partially Obstructed	no	NA	NA	NA	17.7	48	61.4	23.3	1156.144231	2017-08-08	13:50:00	NA	NA	https://storage.googleapis.com/elegansvariation.org/photos/hawaii2017/C-0233.thumb.jpg	Leaf litter
NA	NA	C-0233	S-05350	Yes	Very Few (1-3)	22.136639	-159.641075	Kauai	Wild forest	Partially Obstructed	no	NA	NA	NA	17.7	48	61.4	23.3	1156.144231	2017-08-08	13:50:00	NA	NA	https://storage.googleapis.com/elegansvariation.org/photos/hawaii2017/C-0233.thumb.jpg	Leaf litter
NA	NA	C-0234	NA	No	NA	22.13326248	-159.6399866	Kauai	Wild forest	Partially Obstructed	no	NA	NA	NA	22.7	23.5	56	24	1159	2017-08-08	13:20:00	NA	NA	https://storage.googleapis.com/elegansvariation.org/photos/hawaii2017/C-0234.thumb.jpg	Fruit
NA	NA	C-0235	NA	Tracks	NA	22.133458	-159.640969	Kauai	Wild forest	Partially Obstructed	no	NA	NA	NA	18.5	30.5	59.9	24	1158	2017-08-08	13:25:00	NA	NA	https://storage.googleapis.com/elegansvariation.org/photos/hawaii2017/C-0235.thumb.jpg	Leaf litter
NA	NA	C-0236	S-05514	Yes	Very Few (1-3)	22.134103	-159.641314	Kauai	Wild forest	Partially Obstructed	no	NA	NA	NA	21.4	17.5	59.9	24	1149.118644	2017-08-08	13:38:00	NA	NA	https://storage.googleapis.com/elegansvariation.org/photos/hawaii2017/C-0236.thumb.jpg	Fungus
NA	NA	C-0237	NA	No	NA	21.987369	-159.628303	Kauai	Wild forest	Partially Obstructed	no	NA	NA	NA	18	40.5	64.9	22.611111111111114	84.09435311	2017-08-08	08:38:00	NA	NA	https://storage.googleapis.com/elegansvariation.org/photos/hawaii2017/C-0237.thumb.jpg	Fruit
NA	NA	C-0238	S-05319	Yes	Very Few (1-3)	22.094539	-159.674439	Kauai	Wild forest	Partially Obstructed	no	NA	NA	NA	24.9	NA	71.7	23.6	1083.675676	2017-08-07	17:23:00	NA	NA	https://storage.googleapis.com/elegansvariation.org/photos/hawaii2017/C-0238.thumb.jpg	Vegetation
NA	NA	C-0238	S-05320	Yes	Very Few (1-3)	22.094539	-159.674439	Kauai	Wild forest	Partially Obstructed	no	NA	NA	NA	24.9	NA	71.7	23.6	1083.675676	2017-08-07	17:23:00	NA	NA	https://storage.googleapis.com/elegansvariation.org/photos/hawaii2017/C-0238.thumb.jpg	Vegetation
NA	NA	C-0239	S-05304	Yes	Very Few (1-3)	22.094358	-159.674272	Kauai	Wild forest	Partially Obstructed	no	NA	NA	NA	22.8	29.5	70.7	22.9	1067.58042	2017-08-07	17:19:00	0	Unknown	https://storage.googleapis.com/elegansvariation.org/photos/hawaii2017/C-0239.thumb.jpg	Leaf litter
NA	NA	C-0240	S-05480	Yes	Very Few (1-3)	22.12600815	-159.5737687	Kauai	Wild forest	Partially Obstructed	no	NA	NA	NA	17.3	37	66.5	21.9	1268	2017-08-08	11:03:00	NA	NA	https://storage.googleapis.com/elegansvariation.org/photos/hawaii2017/C-0240.thumb.jpg	Leaf litter
NA	NA	C-0241	NA	No	NA	22.13017836	-159.657766	Kauai	Wild forest	Partially Obstructed	NA	NA	NA	NA	27	NA	74.1	24.3	1118	2017-08-07	17:12:00	NA	NA	https://storage.googleapis.com/elegansvariation.org/photos/hawaii2017/C-0241.thumb.jpg	Fruit
NA	NA	C-0242	S-05243	Yes	Very Few (1-3)	22.108408	-159.671308	Kauai	Wild forest	Partially Obstructed	no	NA	NA	NA	23.1	19	73.2	23.6	1086.463768	2017-08-07	17:07:00	NA	NA	https://storage.googleapis.com/elegansvariation.org/photos/hawaii2017/C-0242.thumb.jpg	Leaf litter
NA	NA	C-0242	S-05244	Yes	Very Few (1-3)	22.108408	-159.671308	Kauai	Wild forest	Partially Obstructed	no	NA	NA	NA	23.1	19	73.2	23.6	1086.463768	2017-08-07	17:07:00	0	Unknown	https://storage.googleapis.com/elegansvariation.org/photos/hawaii2017/C-0242.thumb.jpg	Leaf litter
NA	NA	C-0243	NA	No	NA	22.113939	-159.670761	Kauai	Wild forest	Partially Obstructed	no	NA	NA	NA	20.1	33.5	71.7	23.6	1108.734694	2017-08-07	17:03:00	NA	NA	https://storage.googleapis.com/elegansvariation.org/photos/hawaii2017/C-0243.thumb.jpg	Leaf litter
NA	NA	C-0244	NA	No	NA	22.120075	-159.665781	Kauai	Wild forest	Partially Obstructed	no	NA	NA	NA	28.4	18	52.9	26.1	1121.905405	2017-08-07	16:53:00	NA	NA	https://storage.googleapis.com/elegansvariation.org/photos/hawaii2017/C-0244.thumb.jpg	Leaf litter
NA	NA	C-0245	S-05286	Yes	Few (4-10)	22.113936	-159.670781	Kauai	Wild forest	Partially Obstructed	no	NA	NA	NA	23.5	3	72.7	23.6	1112.463768	2017-08-07	16:58:00	NA	NA	https://storage.googleapis.com/elegansvariation.org/photos/hawaii2017/C-0245.thumb.jpg	Vegetation
NA	NA	C-0245	S-05290	Yes	Few (4-10)	22.113936	-159.670781	Kauai	Wild forest	Partially Obstructed	no	NA	NA	NA	23.5	3	72.7	23.6	1112.463768	2017-08-07	16:58:00	0	Unknown	https://storage.googleapis.com/elegansvariation.org/photos/hawaii2017/C-0245.thumb.jpg	Vegetation
NA	NA	C-0245	S-05294	Yes	Few (4-10)	22.113936	-159.670781	Kauai	Wild forest	Partially Obstructed	no	NA	NA	NA	23.5	3	72.7	23.6	1112.463768	2017-08-07	16:58:00	0	Unknown	https://storage.googleapis.com/elegansvariation.org/photos/hawaii2017/C-0245.thumb.jpg	Vegetation
NA	NA	C-0245	S-05298	Yes	Few (4-10)	22.113936	-159.670781	Kauai	Wild forest	Partially Obstructed	no	NA	NA	NA	23.5	3	72.7	23.6	1112.463768	2017-08-07	16:58:00	0	Unknown	https://storage.googleapis.com/elegansvariation.org/photos/hawaii2017/C-0245.thumb.jpg	Vegetation
NA	NA	C-0246	NA	No	NA	22.12957813	-159.6582361	Kauai	Urban garden	Partially Obstructed	NA	NA	NA	NA	19.9	14	62.4	23.6	1130	2017-08-07	16:43:00	NA	NA	https://storage.googleapis.com/elegansvariation.org/photos/hawaii2017/C-0246.thumb.jpg	Flower
NA	NA	C-0247	S-05315	Yes	Very Few (1-3)	22.144611	-159.647394	Kauai	Wild grassland	Partially Obstructed	no	NA	NA	NA	17.8	31	57.8	24.277777777777782	1246.514286	2017-08-07	16:28:00	NA	NA	https://storage.googleapis.com/elegansvariation.org/photos/hawaii2017/C-0247.thumb.jpg	Leaf litter
NA	NA	C-0248	NA	No	NA	22.150661	-159.644767	Kauai	Wild grassland	Partially Obstructed	no	NA	NA	NA	17.8	32.5	54.4	25.6	1260.116883	2017-08-07	16:25:00	NA	NA	https://storage.googleapis.com/elegansvariation.org/photos/hawaii2017/C-0248.thumb.jpg	Fruit
NA	NA	C-0249	NA	No	NA	22.140033	-159.651317	Kauai	Wild forest	Partially Obstructed	no	NA	NA	NA	17.8	30	61.9	23.1	1247.383178	2017-08-07	16:32:00	NA	NA	https://storage.googleapis.com/elegansvariation.org/photos/hawaii2017/C-0249.thumb.jpg	Leaf litter
NA	NA	C-0250	NA	No	NA	22.150686	-159.64475	Kauai	Wild grassland	Full	no	NA	NA	NA	19.8	18	44.3	31.1	1259.497436	2017-08-07	16:20:00	NA	NA	https://storage.googleapis.com/elegansvariation.org/photos/hawaii2017/C-0250.thumb.jpg	Flower
NA	NA	C-0251	S-07479	Yes	Some (11-25)	22.074733	-159.42095	Kauai	Wild forest	Partially Obstructed	no	NA	NA	NA	22	NA	91	24	229.9074074	2017-08-09	07:59:00	NA	NA	https://storage.googleapis.com/elegansvariation.org/photos/hawaii2017/C-0251.thumb.jpg	Flower
NA	NA	C-0251	S-07492	Yes	Some (11-25)	22.074733	-159.42095	Kauai	Wild forest	Partially Obstructed	no	NA	NA	NA	22	NA	91	24	229.9074074	2017-08-09	07:59:00	NA	NA	https://storage.googleapis.com/elegansvariation.org/photos/hawaii2017/C-0251.thumb.jpg	Flower
NA	NA	C-0252	NA	No	NA	22.076797	-159.422264	Kauai	Wild forest	Partially Obstructed	no	NA	NA	NA	22.5	NA	95.3	24	248.9148352	2017-08-09	08:16:00	NA	NA	https://storage.googleapis.com/elegansvariation.org/photos/hawaii2017/C-0252.thumb.jpg	Flower
NA	NA	C-0253	S-05580	Yes	Some (11-25)	22.075553	-159.421542	Kauai	Wild forest	Partially Obstructed	no	NA	NA	NA	23.2	NA	89.7	24.9	241.0691824	2017-08-09	08:10:00	1	C. briggsae	https://storage.googleapis.com/elegansvariation.org/photos/hawaii2017/C-0253.thumb.jpg	Flower
NA	NA	C-0253	S-05591	Yes	Some (11-25)	22.075553	-159.421542	Kauai	Wild forest	Partially Obstructed	no	NA	NA	NA	23.2	NA	89.7	24.9	241.0691824	2017-08-09	08:10:00	1	C. briggsae	https://storage.googleapis.com/elegansvariation.org/photos/hawaii2017/C-0253.thumb.jpg	Flower
NA	NA	C-0254	NA	No	NA	22.075475	-159.421553	Kauai	Wild forest	Partially Obstructed	no	NA	NA	NA	22.6	NA	89.2	24.7	238.6143791	2017-08-09	08:05:00	NA	NA	https://storage.googleapis.com/elegansvariation.org/photos/hawaii2017/C-0254.thumb.jpg	Fruit
NA	NA	C-0255	S-05511	Yes	Few (4-10)	22.071869	-159.418867	Kauai	Wild forest	Partially Obstructed	no	NA	NA	NA	21.9	58.5	94	23.3	173.4551724	2017-08-09	07:57:00	0	Unknown	https://storage.googleapis.com/elegansvariation.org/photos/hawaii2017/C-0255.thumb.jpg	Leaf litter
NA	NA	C-0255	S-05537	Yes	Few (4-10)	22.071869	-159.418867	Kauai	Wild forest	Partially Obstructed	no	NA	NA	NA	21.9	58.5	94	23.3	173.4551724	2017-08-09	07:57:00	0	Unknown	https://storage.googleapis.com/elegansvariation.org/photos/hawaii2017/C-0255.thumb.jpg	Leaf litter
NA	NA	C-0255	S-05538	Yes	Few (4-10)	22.071869	-159.418867	Kauai	Wild forest	Partially Obstructed	no	NA	NA	NA	21.9	58.5	94	23.3	173.4551724	2017-08-09	07:57:00	NA	NA	https://storage.googleapis.com/elegansvariation.org/photos/hawaii2017/C-0255.thumb.jpg	Leaf litter
NA	NA	C-0256	S-05681	Yes	Proliferating (25+)	22.075008	-159.421022	Kauai	Wild forest	Partially Obstructed	no	NA	NA	NA	21.8	NA	88.7	24.3	229.9924242	2017-08-09	08:01:00	1	C. kamaaina	https://storage.googleapis.com/elegansvariation.org/photos/hawaii2017/C-0256.thumb.jpg	Flower
NA	NA	C-0256	S-05682	Yes	Proliferating (25+)	22.075008	-159.421022	Kauai	Wild forest	Partially Obstructed	no	NA	NA	NA	21.8	NA	88.7	24.3	229.9924242	2017-08-09	08:01:00	NA	NA	https://storage.googleapis.com/elegansvariation.org/photos/hawaii2017/C-0256.thumb.jpg	Flower
NA	NA	C-0256	S-05683	Yes	Proliferating (25+)	22.075008	-159.421022	Kauai	Wild forest	Partially Obstructed	no	NA	NA	NA	21.8	NA	88.7	24.3	229.9924242	2017-08-09	08:01:00	1	C. kamaaina	https://storage.googleapis.com/elegansvariation.org/photos/hawaii2017/C-0256.thumb.jpg	Flower
NA	NA	C-0257	S-05613	Yes	Proliferating (25+)	22.071756	-159.418808	Kauai	Wild forest	Partially Obstructed	no	NA	NA	NA	22.4	NA	82.9	24.7	168.2667068	2017-08-09	07:48:00	NA	NA	https://storage.googleapis.com/elegansvariation.org/photos/hawaii2017/C-0257.thumb.jpg	Flower
NA	NA	C-0257	S-05637	Yes	Proliferating (25+)	22.071756	-159.418808	Kauai	Wild forest	Partially Obstructed	no	NA	NA	NA	22.4	NA	82.9	24.7	168.2667068	2017-08-09	07:48:00	1	C. oiwi	https://storage.googleapis.com/elegansvariation.org/photos/hawaii2017/C-0257.thumb.jpg	Flower
NA	NA	C-0257	S-05641	Yes	Proliferating (25+)	22.071756	-159.418808	Kauai	Wild forest	Partially Obstructed	no	NA	NA	NA	22.4	NA	82.9	24.7	168.2667068	2017-08-09	07:48:00	NA	NA	https://storage.googleapis.com/elegansvariation.org/photos/hawaii2017/C-0257.thumb.jpg	Flower
NA	NA	C-0258	NA	No	NA	22.078806	-159.422911	Kauai	Wild forest	Partially Obstructed	no	NA	NA	NA	22.4	57	97.9	24.7	273.0538117	2017-08-09	08:20:00	NA	NA	https://storage.googleapis.com/elegansvariation.org/photos/hawaii2017/C-0258.thumb.jpg	Flower
NA	NA	C-0259	NA	Tracks	NA	22.078728	-159.423044	Kauai	Wild forest	Partially Obstructed	no	NA	NA	NA	22.9	61	97	24	255.4871795	2017-08-09	08:25:00	NA	NA	https://storage.googleapis.com/elegansvariation.org/photos/hawaii2017/C-0259.thumb.jpg	Fruit
NA	NA	C-0260	S-07478	Yes	Very Few (1-3)	22.079544	-159.423314	Kauai	Wild forest	Partially Obstructed	no	NA	NA	NA	23.5	60.5	97	25.3	270.8769231	2017-08-09	08:29:00	0	Unknown	https://storage.googleapis.com/elegansvariation.org/photos/hawaii2017/C-0260.thumb.jpg	Leaf litter
NA	NA	C-0260	S-07502	Yes	Very Few (1-3)	22.079544	-159.423314	Kauai	Wild forest	Partially Obstructed	no	NA	NA	NA	23.5	60.5	97	25.3	270.8769231	2017-08-09	08:29:00	NA	NA	https://storage.googleapis.com/elegansvariation.org/photos/hawaii2017/C-0260.thumb.jpg	Leaf litter
NA	NA	C-0261	S-07497	Yes	Some (11-25)	22.081542	-159.426017	Kauai	Wild forest	Obstructed	yes	9	E	3	23.1	NA	79.5	24.9	280.1080139	2017-08-09	11:39:00	NA	NA	https://storage.googleapis.com/elegansvariation.org/photos/hawaii2017/C-0261.thumb.jpg	Flower
NA	NA	C-0261	S-07511	Yes	Some (11-25)	22.081542	-159.426017	Kauai	Wild forest	Obstructed	yes	9	E	3	23.1	NA	79.5	24.9	280.1080139	2017-08-09	11:39:00	NA	NA	https://storage.googleapis.com/elegansvariation.org/photos/hawaii2017/C-0261.thumb.jpg	Flower
NA	NA	C-0262	S-05599	Yes	Few (4-10)	22.081506	-159.426217	Kauai	Wild forest	Obstructed	yes	9	F	3	22	64.5	77.1	24.9	282.74375	2017-08-09	11:40:00	NA	NA	https://storage.googleapis.com/elegansvariation.org/photos/hawaii2017/C-0262.thumb.jpg	Leaf litter
NA	NA	C-0262	S-05605	Yes	Few (4-10)	22.081506	-159.426217	Kauai	Wild forest	Obstructed	yes	9	F	3	22	64.5	77.1	24.9	282.74375	2017-08-09	11:40:00	0	Unknown	https://storage.googleapis.com/elegansvariation.org/photos/hawaii2017/C-0262.thumb.jpg	Leaf litter
NA	NA	C-0262	S-05606	Yes	Few (4-10)	22.081506	-159.426217	Kauai	Wild forest	Obstructed	yes	9	F	3	22	64.5	77.1	24.9	282.74375	2017-08-09	11:40:00	NA	NA	https://storage.googleapis.com/elegansvariation.org/photos/hawaii2017/C-0262.thumb.jpg	Leaf litter
NA	NA	C-0263	S-07506	Yes	Proliferating (25+)	22.081378	-159.426053	Kauai	Wild forest	Obstructed	yes	9	B	1	22.1	NA	76.1	25.6	281.6298701	2017-08-09	11:44:00	0	Unknown	https://storage.googleapis.com/elegansvariation.org/photos/hawaii2017/C-0263.thumb.jpg	Flower
NA	NA	C-0263	S-07512	Yes	Proliferating (25+)	22.081378	-159.426053	Kauai	Wild forest	Obstructed	yes	9	B	1	22.1	NA	76.1	25.6	281.6298701	2017-08-09	11:44:00	0	Unknown	https://storage.googleapis.com/elegansvariation.org/photos/hawaii2017/C-0263.thumb.jpg	Flower
NA	NA	C-0264	S-05581	Yes	Few (4-10)	22.08145	-159.426125	Kauai	Wild forest	Obstructed	yes	9	F	2	21.9	66.5	80.4	25.6	281.4824121	2017-08-09	11:42:00	1	C. briggsae	https://storage.googleapis.com/elegansvariation.org/photos/hawaii2017/C-0264.thumb.jpg	Leaf litter
NA	NA	C-0265	S-05185	Yes	Proliferating (25+)	22.081536	-159.426114	Kauai	Wild forest	Obstructed	yes	9	A	1	22.1	65.5	76.1	26.3	285.0911111	2017-08-09	11:43:00	0	Unknown	https://storage.googleapis.com/elegansvariation.org/photos/hawaii2017/C-0265.thumb.jpg	Leaf litter
NA	NA	C-0265	S-07517	Yes	Proliferating (25+)	22.081536	-159.426114	Kauai	Wild forest	Obstructed	yes	9	A	1	22.1	65.5	76.1	26.3	285.0911111	2017-08-09	11:43:00	0	Unknown	https://storage.googleapis.com/elegansvariation.org/photos/hawaii2017/C-0265.thumb.jpg	Leaf litter
NA	NA	C-0266	S-07467	Yes	Few (4-10)	22.081364	-159.426144	Kauai	Wild forest	Obstructed	yes	9	D	3	22.7	NA	79.4	24.9	281.4052288	2017-08-09	11:47:00	1	C. briggsae	https://storage.googleapis.com/elegansvariation.org/photos/hawaii2017/C-0266.thumb.jpg	Leaf litter
NA	NA	C-0266	S-07472	Yes	Few (4-10)	22.081364	-159.426144	Kauai	Wild forest	Obstructed	yes	9	D	3	22.7	NA	79.4	24.9	281.4052288	2017-08-09	11:47:00	1	C. briggsae	https://storage.googleapis.com/elegansvariation.org/photos/hawaii2017/C-0266.thumb.jpg	Leaf litter
NA	NA	C-0267	NA	No	NA	22.100683	-159.375597	Kauai	Wild forest	Partially Obstructed	no	NA	NA	NA	26.9	NA	70.2	28.4	127.08125	2017-08-09	13:10:00	NA	NA	https://storage.googleapis.com/elegansvariation.org/photos/hawaii2017/C-0267.thumb.jpg	Flower
NA	NA	C-0268	NA	Tracks	NA	22.100686	-159.375603	Kauai	Wild forest	Partially Obstructed	no	NA	NA	NA	25	63	70.3	28.4	137.9019074	2017-08-09	13:10:00	NA	NA	https://storage.googleapis.com/elegansvariation.org/photos/hawaii2017/C-0268.thumb.jpg	Leaf litter
NA	NA	C-0269	NA	Tracks	NA	22.102539	-159.386672	Kauai	Wild forest	Partially Obstructed	no	NA	NA	NA	25.2	66	63.5	29.8	174.6430155	2017-08-09	13:29:00	NA	NA	https://storage.googleapis.com/elegansvariation.org/photos/hawaii2017/C-0269.thumb.jpg	Leaf litter
NA	NA	C-0270	S-05544	Yes	Very Few (1-3)	22.102608	-159.387061	Kauai	Wild forest	Partially Obstructed	no	NA	NA	NA	24.5	63	66.1	29.1	178.6509091	2017-08-09	13:31:00	NA	NA	https://storage.googleapis.com/elegansvariation.org/photos/hawaii2017/C-0270.thumb.jpg	Leaf litter
NA	NA	C-0271	S-07475	Yes	Few (4-10)	22.081467	-159.426286	Kauai	Wild forest	Obstructed	yes	9	D	2	23	59	77.5	24.9	281.0586957	2017-08-09	11:48:00	1	Oscheius sp.	https://storage.googleapis.com/elegansvariation.org/photos/hawaii2017/C-0271.thumb.jpg	Leaf litter
NA	NA	C-0271	S-07476	Yes	Few (4-10)	22.081467	-159.426286	Kauai	Wild forest	Obstructed	yes	9	D	2	23	59	77.5	24.9	281.0586957	2017-08-09	11:48:00	NA	NA	https://storage.googleapis.com/elegansvariation.org/photos/hawaii2017/C-0271.thumb.jpg	Leaf litter
NA	NA	C-0271	S-07483	Yes	Few (4-10)	22.081467	-159.426286	Kauai	Wild forest	Obstructed	yes	9	D	2	23	59	77.5	24.9	281.0586957	2017-08-09	11:48:00	1	C. briggsae	https://storage.googleapis.com/elegansvariation.org/photos/hawaii2017/C-0271.thumb.jpg	Leaf litter
NA	NA	C-0271	S-07499	Yes	Few (4-10)	22.081467	-159.426286	Kauai	Wild forest	Obstructed	yes	9	D	2	23	59	77.5	24.9	281.0586957	2017-08-09	11:48:00	1	C. briggsae	https://storage.googleapis.com/elegansvariation.org/photos/hawaii2017/C-0271.thumb.jpg	Leaf litter
NA	NA	C-0272	S-05663	Yes	Very Few (1-3)	22.069731	-159.413903	Kauai	Wild forest	Obstructed	no	NA	NA	NA	23.9	58	69.6	28.4	211.4065934	2017-08-09	12:43:00	0	Unknown	https://storage.googleapis.com/elegansvariation.org/photos/hawaii2017/C-0272.thumb.jpg	Leaf litter
NA	NA	C-0272	S-05664	Yes	Very Few (1-3)	22.069731	-159.413903	Kauai	Wild forest	Obstructed	no	NA	NA	NA	23.9	58	69.6	28.4	211.4065934	2017-08-09	12:43:00	0	Unknown	https://storage.googleapis.com/elegansvariation.org/photos/hawaii2017/C-0272.thumb.jpg	Leaf litter
NA	NA	C-0273	S-05504	Yes	Few (4-10)	22.082389	-159.350322	Kauai	Wild forest	Partially Obstructed	no	NA	NA	NA	28.2	36	67.2	29.1	70.03666667	2017-08-09	12:59:00	NA	NA	https://storage.googleapis.com/elegansvariation.org/photos/hawaii2017/C-0273.thumb.jpg	Leaf litter
NA	NA	C-0273	S-05517	Yes	Few (4-10)	22.082389	-159.350322	Kauai	Wild forest	Partially Obstructed	no	NA	NA	NA	28.2	36	67.2	29.1	70.03666667	2017-08-09	12:59:00	NA	NA	https://storage.googleapis.com/elegansvariation.org/photos/hawaii2017/C-0273.thumb.jpg	Leaf litter
NA	NA	C-0274	NA	Tracks	NA	22.103158	-159.387669	Kauai	Wild forest	Partially Obstructed	no	NA	NA	NA	24.2	66	67.7	29.1	181.9020101	2017-08-09	13:35:00	NA	NA	https://storage.googleapis.com/elegansvariation.org/photos/hawaii2017/C-0274.thumb.jpg	Leaf litter
NA	NA	C-0275	S-05603	Yes	Few (4-10)	22.081447	-159.426214	Kauai	Wild forest	Obstructed	yes	9	C	3	22.2	68.5	79.8	24.9	281.8470255	2017-08-09	11:45:00	NA	NA	https://storage.googleapis.com/elegansvariation.org/photos/hawaii2017/C-0275.thumb.jpg	Leaf litter
NA	NA	C-0275	S-05604	Yes	Few (4-10)	22.081447	-159.426214	Kauai	Wild forest	Obstructed	yes	9	C	3	22.2	68.5	79.8	24.9	281.8470255	2017-08-09	11:45:00	0	Unknown	https://storage.googleapis.com/elegansvariation.org/photos/hawaii2017/C-0275.thumb.jpg	Leaf litter
NA	NA	C-0276	S-05593	Yes	Few (4-10)	22.103956	-159.388547	Kauai	Wild forest	Partially Obstructed	no	NA	NA	NA	23.6	68	77.5	28.4	188.888868	2017-08-09	13:49:00	1	Oscheius sp.	https://storage.googleapis.com/elegansvariation.org/photos/hawaii2017/C-0276.thumb.jpg	Leaf litter
NA	NA	C-0276	S-05594	Yes	Few (4-10)	22.103956	-159.388547	Kauai	Wild forest	Partially Obstructed	no	NA	NA	NA	23.6	68	77.5	28.4	188.888868	2017-08-09	13:49:00	NA	NA	https://storage.googleapis.com/elegansvariation.org/photos/hawaii2017/C-0276.thumb.jpg	Leaf litter
NA	NA	C-0278	NA	No	NA	22.102517	-159.386714	Kauai	Wild forest	Partially Obstructed	no	NA	NA	NA	25.5	NA	72.6	27.4	163.307554	2017-08-09	13:34:00	NA	NA	https://storage.googleapis.com/elegansvariation.org/photos/hawaii2017/C-0278.thumb.jpg	Flower
NA	NA	C-0279	NA	No	NA	22.102336	-159.386303	Kauai	Wild forest	Partially Obstructed	no	NA	NA	NA	24.3	NA	71.1	27.6	161.5737931	2017-08-09	13:31:00	NA	NA	https://storage.googleapis.com/elegansvariation.org/photos/hawaii2017/C-0279.thumb.jpg	Invertebrate
NA	NA	C-0280	S-05567	Yes	Few (4-10)	22.102325	-159.386303	Kauai	Wild forest	Partially Obstructed	no	NA	NA	NA	24.2	68	67.7	27.4	161.2611684	2017-08-09	13:29:00	0	Unknown	https://storage.googleapis.com/elegansvariation.org/photos/hawaii2017/C-0280.thumb.jpg	Leaf litter
NA	NA	C-0280	S-05575	Yes	Few (4-10)	22.102325	-159.386303	Kauai	Wild forest	Partially Obstructed	no	NA	NA	NA	24.2	68	67.7	27.4	161.2611684	2017-08-09	13:29:00	1	C. briggsae	https://storage.googleapis.com/elegansvariation.org/photos/hawaii2017/C-0280.thumb.jpg	Leaf litter
NA	NA	C-0281	S-05586	Yes	Very Few (1-3)	22.081308	-159.426189	Kauai	Wild forest	Obstructed	yes	9	A	0	21.8	69	78	24.9	283.2833333	2017-08-09	11:49:00	0	Unknown	https://storage.googleapis.com/elegansvariation.org/photos/hawaii2017/C-0281.thumb.jpg	Leaf litter
NA	NA	C-0282	S-05607	Yes	Proliferating (25+)	22.081308	-159.426189	Kauai	Wild forest	Obstructed	yes	9	D	1	22	69	79.5	24.9	283.666792	2017-08-09	11:48:00	0	Unknown	https://storage.googleapis.com/elegansvariation.org/photos/hawaii2017/C-0282.thumb.jpg	Leaf litter
NA	NA	C-0282	S-05608	Yes	Proliferating (25+)	22.081308	-159.426189	Kauai	Wild forest	Obstructed	yes	9	D	1	22	69	79.5	24.9	283.666792	2017-08-09	11:48:00	0	Unknown	https://storage.googleapis.com/elegansvariation.org/photos/hawaii2017/C-0282.thumb.jpg	Leaf litter
NA	NA	C-0283	S-05219	Yes	Few (4-10)	22.081319	-159.426267	Kauai	Wild forest	Obstructed	yes	9	C	2	22	70	80.5	25.6	284.374359	2017-08-09	11:47:00	0	Unknown	https://storage.googleapis.com/elegansvariation.org/photos/hawaii2017/C-0283.thumb.jpg	Leaf litter
NA	NA	C-0283	S-05224	Yes	Few (4-10)	22.081319	-159.426267	Kauai	Wild forest	Obstructed	yes	9	C	2	22	70	80.5	25.6	284.374359	2017-08-09	11:47:00	0	Unknown	https://storage.googleapis.com/elegansvariation.org/photos/hawaii2017/C-0283.thumb.jpg	Leaf litter
NA	NA	C-0284	S-05195	Yes	Some (11-25)	22.081356	-159.426164	Kauai	Wild forest	Obstructed	yes	9	C	1	21.7	70	79.8	24.9	283.8963415	2017-08-09	11:46:00	0	Unknown	https://storage.googleapis.com/elegansvariation.org/photos/hawaii2017/C-0284.thumb.jpg	Leaf litter
NA	NA	C-0284	S-05196	Yes	Some (11-25)	22.081356	-159.426164	Kauai	Wild forest	Obstructed	yes	9	C	1	21.7	70	79.8	24.9	283.8963415	2017-08-09	11:46:00	0	Unknown	https://storage.googleapis.com/elegansvariation.org/photos/hawaii2017/C-0284.thumb.jpg	Leaf litter
NA	NA	C-0285	S-05595	Yes	Some (11-25)	22.081478	-159.426103	Kauai	Wild forest	Obstructed	yes	9	B	3	22.1	69	76.1	25.6	286.7062147	2017-08-09	11:44:00	0	Unknown	https://storage.googleapis.com/elegansvariation.org/photos/hawaii2017/C-0285.thumb.jpg	Leaf litter
NA	NA	C-0285	S-05598	Yes	Some (11-25)	22.081478	-159.426103	Kauai	Wild forest	Obstructed	yes	9	B	3	22.1	69	76.1	25.6	286.7062147	2017-08-09	11:44:00	0	Unknown	https://storage.googleapis.com/elegansvariation.org/photos/hawaii2017/C-0285.thumb.jpg	Leaf litter
NA	NA	C-0286	S-05220	Yes	Some (11-25)	22.081408	-159.42615	Kauai	Wild forest	Obstructed	yes	9	B	2	22.1	66	76.9	25.6	289.3157163	2017-08-09	11:45:00	0	Unknown	https://storage.googleapis.com/elegansvariation.org/photos/hawaii2017/C-0286.thumb.jpg	Leaf litter
NA	NA	C-0286	S-05221	Yes	Some (11-25)	22.081408	-159.42615	Kauai	Wild forest	Obstructed	yes	9	B	2	22.1	66	76.9	25.6	289.3157163	2017-08-09	11:45:00	0	Unknown	https://storage.googleapis.com/elegansvariation.org/photos/hawaii2017/C-0286.thumb.jpg	Leaf litter
NA	NA	C-0287	S-07493	Yes	Few (4-10)	22.081397	-159.426083	Kauai	Wild forest	Obstructed	yes	9	A	2	22.1	67	76.1	26.3	287.0356234	2017-08-09	11:43:00	0	Unknown	https://storage.googleapis.com/elegansvariation.org/photos/hawaii2017/C-0287.thumb.jpg	Leaf litter
NA	NA	C-0287	S-07494	Yes	Few (4-10)	22.081397	-159.426083	Kauai	Wild forest	Obstructed	yes	9	A	2	22.1	67	76.1	26.3	287.0356234	2017-08-09	11:43:00	NA	NA	https://storage.googleapis.com/elegansvariation.org/photos/hawaii2017/C-0287.thumb.jpg	Leaf litter
NA	NA	C-0287	S-07495	Yes	Few (4-10)	22.081397	-159.426083	Kauai	Wild forest	Obstructed	yes	9	A	2	22.1	67	76.1	26.3	287.0356234	2017-08-09	11:43:00	0	Unknown	https://storage.googleapis.com/elegansvariation.org/photos/hawaii2017/C-0287.thumb.jpg	Leaf litter
NA	NA	C-0287	S-07500	Yes	Few (4-10)	22.081397	-159.426083	Kauai	Wild forest	Obstructed	yes	9	A	2	22.1	67	76.1	26.3	287.0356234	2017-08-09	11:43:00	0	Unknown	https://storage.googleapis.com/elegansvariation.org/photos/hawaii2017/C-0287.thumb.jpg	Leaf litter
NA	NA	C-0288	S-07481	Yes	Few (4-10)	22.081539	-159.426136	Kauai	Wild forest	Obstructed	yes	9	A	3	22.1	69.5	80.4	25.6	287.6963907	2017-08-09	11:42:00	1	C. briggsae	https://storage.googleapis.com/elegansvariation.org/photos/hawaii2017/C-0288.thumb.jpg	Leaf litter
NA	NA	C-0288	S-07489	Yes	Few (4-10)	22.081539	-159.426136	Kauai	Wild forest	Obstructed	yes	9	A	3	22.1	69.5	80.4	25.6	287.6963907	2017-08-09	11:42:00	NA	NA	https://storage.googleapis.com/elegansvariation.org/photos/hawaii2017/C-0288.thumb.jpg	Leaf litter
NA	NA	C-0288	S-07496	Yes	Few (4-10)	22.081539	-159.426136	Kauai	Wild forest	Obstructed	yes	9	A	3	22.1	69.5	80.4	25.6	287.6963907	2017-08-09	11:42:00	1	C. briggsae	https://storage.googleapis.com/elegansvariation.org/photos/hawaii2017/C-0288.thumb.jpg	Leaf litter
NA	NA	C-0289	S-05671	Yes	Very Few (1-3)	22.081461	-159.426097	Kauai	Wild forest	Obstructed	yes	9	F	1	21.8	64	77.1	24.9	277.7304965	2017-08-09	11:41:00	0	Unknown	https://storage.googleapis.com/elegansvariation.org/photos/hawaii2017/C-0289.thumb.jpg	Leaf litter
NA	NA	C-0290	S-05560	Yes	Few (4-10)	22.081394	-159.426297	Kauai	Wild forest	Obstructed	yes	9	E	2	22.1	67.5	77.4	24.9	280.7883212	2017-08-09	11:40:00	0	Unknown	https://storage.googleapis.com/elegansvariation.org/photos/hawaii2017/C-0290.thumb.jpg	Leaf litter
NA	NA	C-0290	S-05564	Yes	Few (4-10)	22.081394	-159.426297	Kauai	Wild forest	Obstructed	yes	9	E	2	22.1	67.5	77.4	24.9	280.7883212	2017-08-09	11:40:00	0	Unknown	https://storage.googleapis.com/elegansvariation.org/photos/hawaii2017/C-0290.thumb.jpg	Leaf litter
NA	NA	C-0291	S-07514	Yes	Very Few (1-3)	22.081581	-159.425928	Kauai	Wild forest	Obstructed	yes	9	E	1	22.9	67	79.5	24.9	283.2188552	2017-08-09	11:39:00	NA	NA	https://storage.googleapis.com/elegansvariation.org/photos/hawaii2017/C-0291.thumb.jpg	Leaf litter
NA	NA	C-0292	S-05227	Yes	Some (11-25)	22.081628	-159.426011	Kauai	Wild forest	Partially Obstructed	yes	8	E	1	22.5	64	77.5	24.9	275.1689189	2017-08-09	11:29:00	0	Unknown	https://storage.googleapis.com/elegansvariation.org/photos/hawaii2017/C-0292.thumb.jpg	Leaf litter
NA	NA	C-0292	S-05228	Yes	Some (11-25)	22.081628	-159.426011	Kauai	Wild forest	Partially Obstructed	yes	8	E	1	22.5	64	77.5	24.9	275.1689189	2017-08-09	11:29:00	0	Unknown	https://storage.googleapis.com/elegansvariation.org/photos/hawaii2017/C-0292.thumb.jpg	Leaf litter
NA	NA	C-0293	S-07461	Yes	Few (4-10)	22.081589	-159.426014	Kauai	Wild forest	Partially Obstructed	yes	8	F	2	22.8	62	78.2	24.9	276.9055118	2017-08-09	11:28:00	NA	NA	https://storage.googleapis.com/elegansvariation.org/photos/hawaii2017/C-0293.thumb.jpg	Leaf litter
NA	NA	C-0293	S-07462	Yes	Few (4-10)	22.081589	-159.426014	Kauai	Wild forest	Partially Obstructed	yes	8	F	2	22.8	62	78.2	24.9	276.9055118	2017-08-09	11:28:00	NA	NA	https://storage.googleapis.com/elegansvariation.org/photos/hawaii2017/C-0293.thumb.jpg	Leaf litter
NA	NA	C-0293	S-07463	Yes	Few (4-10)	22.081589	-159.426014	Kauai	Wild forest	Partially Obstructed	yes	8	F	2	22.8	62	78.2	24.9	276.9055118	2017-08-09	11:28:00	NA	NA	https://storage.googleapis.com/elegansvariation.org/photos/hawaii2017/C-0293.thumb.jpg	Leaf litter
NA	NA	C-0293	S-07464	Yes	Few (4-10)	22.081589	-159.426014	Kauai	Wild forest	Partially Obstructed	yes	8	F	2	22.8	62	78.2	24.9	276.9055118	2017-08-09	11:28:00	0	Unknown	https://storage.googleapis.com/elegansvariation.org/photos/hawaii2017/C-0293.thumb.jpg	Leaf litter
NA	NA	C-0294	NA	No	NA	22.081625	-159.426028	Kauai	Wild forest	Partially Obstructed	yes	8	C	2	22.7	66.5	76.1	25.6	276.1538462	2017-08-09	11:33:00	NA	NA	https://storage.googleapis.com/elegansvariation.org/photos/hawaii2017/C-0294.thumb.jpg	Leaf litter
NA	NA	C-0295	S-05529	Yes	Very Few (1-3)	22.081661	-159.425992	Kauai	Wild forest	Partially Obstructed	yes	8	C	1	22.7	66.5	74.1	25.6	276.4111111	2017-08-09	11:32:00	NA	NA	https://storage.googleapis.com/elegansvariation.org/photos/hawaii2017/C-0295.thumb.jpg	Leaf litter
NA	NA	C-0295	S-05536	Yes	Very Few (1-3)	22.081661	-159.425992	Kauai	Wild forest	Partially Obstructed	yes	8	C	1	22.7	66.5	74.1	25.6	276.4111111	2017-08-09	11:32:00	NA	NA	https://storage.googleapis.com/elegansvariation.org/photos/hawaii2017/C-0295.thumb.jpg	Leaf litter
NA	NA	C-0296	NA	Tracks	NA	22.081606	-159.426014	Kauai	Wild forest	Partially Obstructed	yes	8	A	0	22.8	64	75.1	25.6	283.4252874	2017-08-09	11:35:00	NA	NA	https://storage.googleapis.com/elegansvariation.org/photos/hawaii2017/C-0296.thumb.jpg	Leaf litter
NA	NA	C-0297	S-05602	Yes	Very Few (1-3)	22.081622	-159.425942	Kauai	Wild forest	Partially Obstructed	yes	8	A	3	22.5	67.5	80.1	24.9	271.4771574	2017-08-09	11:25:00	0	Unknown	https://storage.googleapis.com/elegansvariation.org/photos/hawaii2017/C-0297.thumb.jpg	Leaf litter
NA	NA	C-0298	S-05542	Yes	Few (4-10)	22.081633	-159.425944	Kauai	Wild forest	Partially Obstructed	yes	8	F	3	22.4	60	81.4	24.9	275.2277228	2017-08-09	11:27:00	NA	NA	https://storage.googleapis.com/elegansvariation.org/photos/hawaii2017/C-0298.thumb.jpg	Leaf litter
NA	NA	C-0298	S-05549	Yes	Few (4-10)	22.081633	-159.425944	Kauai	Wild forest	Partially Obstructed	yes	8	F	3	22.4	60	81.4	24.9	275.2277228	2017-08-09	11:27:00	0	Unknown	https://storage.googleapis.com/elegansvariation.org/photos/hawaii2017/C-0298.thumb.jpg	Leaf litter
NA	NA	C-0299	NA	No	NA	22.08165	-159.425992	Kauai	Wild forest	Partially Obstructed	yes	8	D	2	22.6	64	77.7	24.9	278.7483444	2017-08-09	11:31:00	NA	NA	https://storage.googleapis.com/elegansvariation.org/photos/hawaii2017/C-0299.thumb.jpg	Leaf litter
NA	NA	C-0300	S-05233	Yes	Some (11-25)	22.081642	-159.426031	Kauai	Wild forest	Partially Obstructed	yes	8	B	1	22.9	68.5	78	25.2	279.5676101	2017-08-09	11:34:00	0	Unknown	https://storage.googleapis.com/elegansvariation.org/photos/hawaii2017/C-0300.thumb.jpg	Leaf litter
NA	NA	C-0300	S-05562	Yes	Some (11-25)	22.081642	-159.426031	Kauai	Wild forest	Partially Obstructed	yes	8	B	1	22.9	68.5	78	25.2	279.5676101	2017-08-09	11:34:00	0	Unknown	https://storage.googleapis.com/elegansvariation.org/photos/hawaii2017/C-0300.thumb.jpg	Leaf litter
NA	NA	C-0301	S-05654	Yes	Proliferating (25+)	22.201183	-159.472681	Kauai	Wild forest	Partially Obstructed	no	NA	NA	NA	24.7	68.5	85.6	25.666666666666668	21.51186441	2017-08-10	08:32:00	NA	NA	https://storage.googleapis.com/elegansvariation.org/photos/hawaii2017/C-0301.thumb.jpg	Leaf litter
NA	NA	C-0301	S-05658	Yes	Proliferating (25+)	22.201183	-159.472681	Kauai	Wild forest	Partially Obstructed	no	NA	NA	NA	24.7	68.5	85.6	25.666666666666668	21.51186441	2017-08-10	08:32:00	NA	NA	https://storage.googleapis.com/elegansvariation.org/photos/hawaii2017/C-0301.thumb.jpg	Leaf litter
NA	NA	C-0302	S-05854	Yes	Proliferating (25+)	22.199367	-159.474942	Kauai	Wild forest	Partially Obstructed	no	NA	NA	NA	24.6	54	74.9	26.777777777777782	84.33892617	2017-08-10	09:02:00	0	Unknown	https://storage.googleapis.com/elegansvariation.org/photos/hawaii2017/C-0302.thumb.jpg	Leaf litter
NA	NA	C-0302	S-05859	Yes	Proliferating (25+)	22.199367	-159.474942	Kauai	Wild forest	Partially Obstructed	no	NA	NA	NA	24.6	54	74.9	26.777777777777782	84.33892617	2017-08-10	09:02:00	0	Unknown	https://storage.googleapis.com/elegansvariation.org/photos/hawaii2017/C-0302.thumb.jpg	Leaf litter
NA	NA	C-0303	NA	No	NA	20.950294	-156.534836	Maui	Wild forest	Partially Obstructed	no	NA	NA	NA	25.3	53	82.7	24.9	423	2017-08-13	15:24:00	NA	NA	https://storage.googleapis.com/elegansvariation.org/photos/hawaii2017/C-0303.thumb.jpg	Leaf litter
NA	NA	C-0304	S-06543	Yes	Some (11-25)	20.948894	-156.535525	Maui	Wild forest	Partially Obstructed	no	NA	NA	NA	22.9	62	81.8	24.7	428.7289157	2017-08-13	16:33:00	NA	NA	https://storage.googleapis.com/elegansvariation.org/photos/hawaii2017/C-0304.thumb.jpg	Leaf litter
NA	NA	C-0304	S-06548	Yes	Some (11-25)	20.948894	-156.535525	Maui	Wild forest	Partially Obstructed	no	NA	NA	NA	22.9	62	81.8	24.7	428.7289157	2017-08-13	16:33:00	NA	NA	https://storage.googleapis.com/elegansvariation.org/photos/hawaii2017/C-0304.thumb.jpg	Leaf litter
NA	NA	C-0305	NA	No	NA	22.201819	-159.472944	Kauai	Wild forest	Full	no	NA	NA	NA	24.7	NA	85.5	26.33333333333334	19.71489818	2017-08-10	08:33:00	NA	NA	https://storage.googleapis.com/elegansvariation.org/photos/hawaii2017/C-0305.thumb.jpg	Fruit
NA	NA	C-0306	NA	No	NA	22.199281	-159.475231	Kauai	Wild forest	Partially Obstructed	no	NA	NA	NA	23.9	NA	80	25.666666666666668	95.47926267	2017-08-10	09:04:00	NA	NA	https://storage.googleapis.com/elegansvariation.org/photos/hawaii2017/C-0306.thumb.jpg	Fruit
NA	NA	C-0307	NA	Tracks	NA	20.950026	-156.535021	Maui	Wild forest	Partially Obstructed	no	NA	NA	NA	23.8	65.5	86.8	24.9	423	2017-08-13	15:27:00	NA	NA	https://storage.googleapis.com/elegansvariation.org/photos/hawaii2017/C-0307.thumb.jpg	Leaf litter
NA	NA	C-0308	S-06535	Yes	Few (4-10)	20.9486	-156.5363	Maui	Wild forest	Partially Obstructed	no	NA	NA	NA	22.8	56	81.3	25.3	439.7929293	2017-08-13	16:28:00	NA	NA	https://storage.googleapis.com/elegansvariation.org/photos/hawaii2017/C-0308.thumb.jpg	Leaf litter
NA	NA	C-0308	S-06536	Yes	Few (4-10)	20.9486	-156.5363	Maui	Wild forest	Partially Obstructed	no	NA	NA	NA	22.8	56	81.3	25.3	439.7929293	2017-08-13	16:28:00	0	Unknown	https://storage.googleapis.com/elegansvariation.org/photos/hawaii2017/C-0308.thumb.jpg	Leaf litter
NA	NA	C-0309	S-05653	Yes	Very Few (1-3)	22.201656	-159.4728	Kauai	Wild forest	Obstructed	no	NA	NA	NA	24.5	59	93.7	24.277777777777782	405.6337209	2017-08-10	08:36:00	NA	NA	https://storage.googleapis.com/elegansvariation.org/photos/hawaii2017/C-0309.thumb.jpg	Leaf litter
NA	NA	C-0309	S-05657	Yes	Very Few (1-3)	22.201656	-159.4728	Kauai	Wild forest	Obstructed	no	NA	NA	NA	24.5	59	93.7	24.277777777777782	405.6337209	2017-08-10	08:36:00	NA	NA	https://storage.googleapis.com/elegansvariation.org/photos/hawaii2017/C-0309.thumb.jpg	Leaf litter
NA	NA	C-0310	NA	No	NA	22.19905	-159.475622	Kauai	Wild forest	Partially Obstructed	no	NA	NA	NA	23.7	30.5	82.4	18.5	103.2308313	2017-08-10	09:05:00	NA	NA	https://storage.googleapis.com/elegansvariation.org/photos/hawaii2017/C-0310.thumb.jpg	Vegetation
NA	NA	C-0311	NA	No	NA	20.949369	-156.535222	Maui	Wild forest	Partially Obstructed	yes	13	A	0	22.6	54	86.8	24.9	429.5547445	2017-08-13	15:30:00	NA	NA	https://storage.googleapis.com/elegansvariation.org/photos/hawaii2017/C-0311.thumb.jpg	Leaf litter
NA	NA	C-0312	S-06557	Yes	Very Few (1-3)	20.948582	-156.536245	Maui	Wild forest	Partially Obstructed	no	NA	NA	NA	23	67.5	81.3	25.3	444	2017-08-13	16:28:00	0	Unknown	https://storage.googleapis.com/elegansvariation.org/photos/hawaii2017/C-0312.thumb.jpg	Leaf litter
NA	NA	C-0313	NA	No	NA	22.201731	-159.473428	Kauai	Wild forest	Partially Obstructed	no	NA	NA	NA	25	69.5	94.6	24.277777777777782	22.10164835	2017-08-10	08:38:00	NA	NA	https://storage.googleapis.com/elegansvariation.org/photos/hawaii2017/C-0313.thumb.jpg	Leaf litter
NA	NA	C-0314	S-05944	Yes	Proliferating (25+)	22.198956	-159.476047	Kauai	Wild forest	Partially Obstructed	no	NA	NA	NA	29.2	64.5	82.2	26.33333333333334	108.8898551	2017-08-10	09:08:00	1	C. briggsae	https://storage.googleapis.com/elegansvariation.org/photos/hawaii2017/C-0314.thumb.jpg	Leaf litter
NA	NA	C-0314	S-05945	Yes	Proliferating (25+)	22.198956	-159.476047	Kauai	Wild forest	Partially Obstructed	no	NA	NA	NA	29.2	64.5	82.2	26.33333333333334	108.8898551	2017-08-10	09:08:00	1	Oscheius sp.	https://storage.googleapis.com/elegansvariation.org/photos/hawaii2017/C-0314.thumb.jpg	Leaf litter
NA	NA	C-0315	NA	No	NA	20.949458	-156.53525	Maui	Wild forest	Partially Obstructed	yes	13	A	3	21.7	66	86	24.9	415.4926471	2017-08-13	15:32:00	NA	NA	https://storage.googleapis.com/elegansvariation.org/photos/hawaii2017/C-0315.thumb.jpg	Fungus
NA	NA	C-0316	S-06595	Yes	Proliferating (25+)	20.948744	-156.535883	Maui	Wild forest	Partially Obstructed	no	NA	NA	NA	22.9	62.5	81.3	25.3	429.6099291	2017-08-13	15:51:00	0	Unknown	https://storage.googleapis.com/elegansvariation.org/photos/hawaii2017/C-0316.thumb.jpg	Leaf litter
NA	NA	C-0316	S-06598	Yes	Proliferating (25+)	20.948744	-156.535883	Maui	Wild forest	Partially Obstructed	no	NA	NA	NA	22.9	62.5	81.3	25.3	429.6099291	2017-08-13	15:51:00	0	Unknown	https://storage.googleapis.com/elegansvariation.org/photos/hawaii2017/C-0316.thumb.jpg	Leaf litter
NA	NA	C-0316	S-06599	Yes	Proliferating (25+)	20.948744	-156.535883	Maui	Wild forest	Partially Obstructed	no	NA	NA	NA	22.9	62.5	81.3	25.3	429.6099291	2017-08-13	15:51:00	0	Unknown	https://storage.googleapis.com/elegansvariation.org/photos/hawaii2017/C-0316.thumb.jpg	Leaf litter
NA	NA	C-0316	S-06600	Yes	Proliferating (25+)	20.948744	-156.535883	Maui	Wild forest	Partially Obstructed	no	NA	NA	NA	22.9	62.5	81.3	25.3	429.6099291	2017-08-13	15:51:00	0	Unknown	https://storage.googleapis.com/elegansvariation.org/photos/hawaii2017/C-0316.thumb.jpg	Leaf litter
NA	NA	C-0317	S-05933	Yes	Proliferating (25+)	22.201783	-159.473664	Kauai	Wild forest	Partially Obstructed	no	NA	NA	NA	25.6	NA	94.6	24.94444444444445	23.86257928	2017-08-10	08:40:00	NA	NA	https://storage.googleapis.com/elegansvariation.org/photos/hawaii2017/C-0317.thumb.jpg	Flower
NA	NA	C-0317	S-05937	Yes	Proliferating (25+)	22.201783	-159.473664	Kauai	Wild forest	Partially Obstructed	no	NA	NA	NA	25.6	NA	94.6	24.94444444444445	23.86257928	2017-08-10	08:40:00	1	C. briggsae	https://storage.googleapis.com/elegansvariation.org/photos/hawaii2017/C-0317.thumb.jpg	Flower
NA	NA	C-0318	NA	No	NA	22.198506	-159.476633	Kauai	Wild forest	Partially Obstructed	no	NA	NA	NA	24.2	52.5	89	25.666666666666668	133.5856698	2017-08-10	09:08:00	NA	NA	https://storage.googleapis.com/elegansvariation.org/photos/hawaii2017/C-0318.thumb.jpg	Leaf litter
NA	NA	C-0319	NA	No	NA	20.949322	-156.535258	Maui	Wild forest	Partially Obstructed	yes	13	B	3	21.2	58	86.8	23.6	415.5856574	2017-08-13	15:35:00	NA	NA	https://storage.googleapis.com/elegansvariation.org/photos/hawaii2017/C-0319.thumb.jpg	Leaf litter
NA	NA	C-0320	S-06611	Yes	Very Few (1-3)	20.949722	-156.536608	Maui	Wild forest	Partially Obstructed	no	NA	NA	NA	23.3	58	80.4	25.3	462.3139535	2017-08-13	16:20:00	NA	NA	https://storage.googleapis.com/elegansvariation.org/photos/hawaii2017/C-0320.thumb.jpg	Fruit
NA	NA	C-0321	NA	No	NA	22.201853	-159.473281	Kauai	Wild forest	Partially Obstructed	no	NA	NA	NA	24.5	NA	92.2	24.94444444444445	29.64397906	2017-08-10	08:41:00	NA	NA	https://storage.googleapis.com/elegansvariation.org/photos/hawaii2017/C-0321.thumb.jpg	Fruit
NA	NA	C-0322	NA	No	NA	22.198364	-159.476922	Kauai	Wild forest	Partially Obstructed	no	NA	NA	NA	24.2	60.5	84.4	24.94444444444445	146.9056399	2017-08-10	09:10:00	NA	NA	https://storage.googleapis.com/elegansvariation.org/photos/hawaii2017/C-0322.thumb.jpg	Leaf litter
NA	NA	C-0323	NA	No	NA	20.949264	-156.535181	Maui	Wild forest	Partially Obstructed	yes	13	C	3	20.4	69	87.7	23.6	424.9629156	2017-08-13	15:37:00	NA	NA	https://storage.googleapis.com/elegansvariation.org/photos/hawaii2017/C-0323.thumb.jpg	Leaf litter
NA	NA	C-0324	S-06551	Yes	Few (4-10)	20.672186	-156.335369	Maui	Wild forest	Partially Obstructed	no	NA	NA	NA	14.6	24.5	82.3	17.1	1947.740741	2017-08-14	09:48:00	NA	NA	https://storage.googleapis.com/elegansvariation.org/photos/hawaii2017/C-0324.thumb.jpg	Leaf litter
NA	NA	C-0324	S-06552	Yes	Few (4-10)	20.672186	-156.335369	Maui	Wild forest	Partially Obstructed	no	NA	NA	NA	14.6	24.5	82.3	17.1	1947.740741	2017-08-14	09:48:00	NA	NA	https://storage.googleapis.com/elegansvariation.org/photos/hawaii2017/C-0324.thumb.jpg	Leaf litter
NA	NA	C-0325	NA	No	NA	22.201458	-159.474025	Kauai	Wild forest	Partially Obstructed	no	NA	NA	NA	24.7	66	88.2	24.94444444444445	34.41289199	2017-08-10	08:44:00	NA	NA	https://storage.googleapis.com/elegansvariation.org/photos/hawaii2017/C-0325.thumb.jpg	Leaf litter
NA	NA	C-0326	NA	No	NA	22.1977058	-159.4769475	Kauai	Wild forest	Partially Obstructed	no	NA	NA	NA	24.5	NA	84.3	24.94444444444445	148	2017-08-10	09:15:00	NA	NA	https://storage.googleapis.com/elegansvariation.org/photos/hawaii2017/C-0326.thumb.jpg	Flower
NA	NA	C-0327	NA	Tracks	NA	20.949403	-156.535331	Maui	Wild forest	Partially Obstructed	yes	13	D	3	21.2	68.5	87.8	23.6	418.1606648	2017-08-13	15:39:00	NA	NA	https://storage.googleapis.com/elegansvariation.org/photos/hawaii2017/C-0327.thumb.jpg	Leaf litter
NA	NA	C-0328	NA	No	NA	20.672561	-156.334481	Maui	Wild forest	Partially Obstructed	no	NA	NA	NA	17.2	57.5	82.3	16.4	1929.485294	2017-08-14	09:46:00	NA	NA	https://storage.googleapis.com/elegansvariation.org/photos/hawaii2017/C-0328.thumb.jpg	Fruit
NA	NA	C-0329	NA	No	NA	22.201508	-159.474047	Kauai	Wild forest	Partially Obstructed	no	NA	NA	NA	25.6	63	86.1	25.666666666666668	34.39933993	2017-08-10	08:46:00	NA	NA	https://storage.googleapis.com/elegansvariation.org/photos/hawaii2017/C-0329.thumb.jpg	Fruit
NA	NA	C-0330	NA	No	NA	22.198133	-159.477197	Kauai	Wild forest	Partially Obstructed	no	NA	NA	NA	24.6	57	84.4	25.666666666666668	162.4548872	2017-08-10	09:17:00	NA	NA	https://storage.googleapis.com/elegansvariation.org/photos/hawaii2017/C-0330.thumb.jpg	Leaf litter
NA	NA	C-0331	S-06527	Yes	Very Few (1-3)	20.949444	-156.535461	Maui	Wild forest	Partially Obstructed	yes	13	E	3	21.3	57	88.8	23.6	425.0687023	2017-08-13	15:41:00	0	Unknown	https://storage.googleapis.com/elegansvariation.org/photos/hawaii2017/C-0331.thumb.jpg	Leaf litter
NA	NA	C-0331	S-06528	Yes	Very Few (1-3)	20.949444	-156.535461	Maui	Wild forest	Partially Obstructed	yes	13	E	3	21.3	57	88.8	23.6	425.0687023	2017-08-13	15:41:00	NA	NA	https://storage.googleapis.com/elegansvariation.org/photos/hawaii2017/C-0331.thumb.jpg	Leaf litter
NA	NA	C-0332	S-06567	Yes	Very Few (1-3)	20.671633	-156.336258	Maui	Wild forest	Partially Obstructed	no	NA	NA	NA	14.2	63.5	80.4	17.1	1934.861789	2017-08-14	09:51:00	NA	NA	https://storage.googleapis.com/elegansvariation.org/photos/hawaii2017/C-0332.thumb.jpg	Leaf litter
NA	NA	C-0333	S-05858	Yes	Proliferating (25+)	22.201183	-159.474708	Kauai	Wild forest	Partially Obstructed	no	NA	NA	NA	24.2	67	93.1	24.94444444444445	52.92377495	2017-08-10	08:49:00	0	Unknown	https://storage.googleapis.com/elegansvariation.org/photos/hawaii2017/C-0333.thumb.jpg	Leaf litter
NA	NA	C-0333	S-05901	Yes	Proliferating (25+)	22.201183	-159.474708	Kauai	Wild forest	Partially Obstructed	no	NA	NA	NA	24.2	67	93.1	24.94444444444445	52.92377495	2017-08-10	08:49:00	0	Unknown	https://storage.googleapis.com/elegansvariation.org/photos/hawaii2017/C-0333.thumb.jpg	Leaf litter
NA	NA	C-0334	NA	No	NA	22.198253	-159.47735	Kauai	Wild forest	Partially Obstructed	no	NA	NA	NA	26	NA	82.3	24.66666666666667	159.6028369	2017-08-10	09:24:00	NA	NA	https://storage.googleapis.com/elegansvariation.org/photos/hawaii2017/C-0334.thumb.jpg	Vegetation
NA	NA	C-0335	NA	No	NA	20.949575	-156.535347	Maui	Wild forest	Partially Obstructed	yes	13	F	3	21.3	66.5	91.2	22.9	414.9626168	2017-08-13	15:43:00	NA	NA	https://storage.googleapis.com/elegansvariation.org/photos/hawaii2017/C-0335.thumb.jpg	Leaf litter
NA	NA	C-0336	NA	Tracks	NA	20.670575	-156.335833	Maui	Wild forest	Partially Obstructed	no	NA	NA	NA	14.7	55	74	19.2	1927.386667	2017-08-14	09:54:00	NA	NA	https://storage.googleapis.com/elegansvariation.org/photos/hawaii2017/C-0336.thumb.jpg	Leaf litter
NA	NA	C-0337	S-05855	Yes	Proliferating (25+)	22.200728	-159.475117	Kauai	Wild forest	Partially Obstructed	no	NA	NA	NA	25.3	NA	93.7	24.94444444444445	82.88018433	2017-08-10	08:50:00	0	Unknown	https://storage.googleapis.com/elegansvariation.org/photos/hawaii2017/C-0337.thumb.jpg	Fruit
NA	NA	C-0338	NA	No	NA	22.198564	-159.477256	Kauai	Wild forest	Partially Obstructed	no	NA	NA	NA	24.5	40	80	25.666666666666668	160.7965517	2017-08-10	09:19:00	NA	NA	https://storage.googleapis.com/elegansvariation.org/photos/hawaii2017/C-0338.thumb.jpg	Leaf litter
NA	NA	C-0339	NA	No	NA	20.94872137	-156.535883	Maui	Wild forest	Partially Obstructed	no	NA	NA	NA	23	17	87.2	24.7	432.1028571	2017-08-13	15:53:00	NA	NA	https://storage.googleapis.com/elegansvariation.org/photos/hawaii2017/C-0339.thumb.jpg	Fungus
NA	NA	C-0340	S-06650	Yes	Very Few (1-3)	20.670197	-156.336383	Maui	Wild forest	Partially Obstructed	no	NA	NA	NA	14.5	52.5	83.3	17.1	1892.322581	2017-08-14	09:58:00	0	Unknown	https://storage.googleapis.com/elegansvariation.org/photos/hawaii2017/C-0340.thumb.jpg	Leaf litter
NA	NA	C-0341	NA	No	NA	22.200528	-159.474814	Kauai	Wild forest	Partially Obstructed	no	NA	NA	NA	24.9	NA	86.8	25.666666666666668	49.9540636	2017-08-10	08:54:00	NA	NA	https://storage.googleapis.com/elegansvariation.org/photos/hawaii2017/C-0341.thumb.jpg	Fruit
NA	NA	C-0342	NA	Tracks	NA	20.952117	-156.532844	Maui	Agricultural land	Partially Obstructed	no	NA	NA	NA	29.4	28.5	77.8	25.6	373.632287	2017-08-13	15:13:00	NA	NA	https://storage.googleapis.com/elegansvariation.org/photos/hawaii2017/C-0342.thumb.jpg	Leaf litter
NA	NA	C-0343	S-06609	Yes	Proliferating (25+)	20.94835	-156.536372	Maui	Wild forest	Partially Obstructed	no	NA	NA	NA	22.8	65	82.5	25.3	439.7731959	2017-08-13	15:55:00	1	Teratorhabditis sp.	https://storage.googleapis.com/elegansvariation.org/photos/hawaii2017/C-0343.thumb.jpg	Fungus
NA	NA	C-0343	S-06610	Yes	Proliferating (25+)	20.94835	-156.536372	Maui	Wild forest	Partially Obstructed	no	NA	NA	NA	22.8	65	82.5	25.3	439.7731959	2017-08-13	15:55:00	1	C. briggsae	https://storage.googleapis.com/elegansvariation.org/photos/hawaii2017/C-0343.thumb.jpg	Fungus
NA	NA	C-0344	NA	No	NA	20.669839	-156.337161	Maui	Wild forest	Partially Obstructed	no	NA	NA	NA	14.7	61	85.3	17.1	1874.074627	2017-08-14	10:04:00	NA	NA	https://storage.googleapis.com/elegansvariation.org/photos/hawaii2017/C-0344.thumb.jpg	Fungus
NA	NA	C-0345	NA	No	NA	22.200406	-159.474839	Kauai	Wild forest	Partially Obstructed	no	NA	NA	NA	25.3	64	89.2	26.33333333333334	52.40821256	2017-08-10	08:56:00	NA	NA	https://storage.googleapis.com/elegansvariation.org/photos/hawaii2017/C-0345.thumb.jpg	Fruit
NA	NA	C-0346	NA	No	NA	20.881058	-156.5453	Maui	Wild forest	Partially Obstructed	no	NA	NA	NA	25.1	61	73.1	25.1	288.5423729	2017-08-13	11:09:00	NA	NA	https://storage.googleapis.com/elegansvariation.org/photos/hawaii2017/C-0346.thumb.jpg	Fruit
NA	NA	C-0347	NA	Tracks	NA	20.948803	-156.536511	Maui	Wild forest	Partially Obstructed	no	NA	NA	NA	22.6	62.5	89.6	24	444.2525253	2017-08-13	16:00:00	NA	NA	https://storage.googleapis.com/elegansvariation.org/photos/hawaii2017/C-0347.thumb.jpg	Flower
NA	NA	C-0348	NA	No	NA	20.669414	-156.337236	Maui	Wild forest	Partially Obstructed	no	NA	NA	NA	15.8	51	78.4	18.5	1876.221154	2017-08-14	10:08:00	NA	NA	https://storage.googleapis.com/elegansvariation.org/photos/hawaii2017/C-0348.thumb.jpg	Fungus
NA	NA	C-0349	NA	No	NA	22.200214	-159.47495	Kauai	Wild forest	Partially Obstructed	no	NA	NA	NA	25	67	89.7	26.222222222222225	61.01721854	2017-08-10	08:57:00	NA	NA	https://storage.googleapis.com/elegansvariation.org/photos/hawaii2017/C-0349.thumb.jpg	Leaf litter
NA	NA	C-0350	NA	No	NA	20.951985	-156.533232	Maui	Wild forest	Partially Obstructed	no	NA	NA	NA	28.8	21	80.3	24.9	369	2017-08-13	15:16:00	NA	NA	https://storage.googleapis.com/elegansvariation.org/photos/hawaii2017/C-0350.thumb.jpg	Flower
NA	NA	C-0351	S-06502	Yes	Few (4-10)	20.948725	-156.536525	Maui	Wild forest	Partially Obstructed	no	NA	NA	NA	22.5	65.5	82.5	25.3	450.3017241	2017-08-13	16:24:00	NA	NA	https://storage.googleapis.com/elegansvariation.org/photos/hawaii2017/C-0351.thumb.jpg	Leaf litter
NA	NA	C-0351	S-06503	Yes	Few (4-10)	20.948725	-156.536525	Maui	Wild forest	Partially Obstructed	no	NA	NA	NA	22.5	65.5	82.5	25.3	450.3017241	2017-08-13	16:24:00	NA	NA	https://storage.googleapis.com/elegansvariation.org/photos/hawaii2017/C-0351.thumb.jpg	Leaf litter
NA	NA	C-0352	S-06588	Yes	Very Few (1-3)	20.679658	-156.330458	Maui	Wild forest	Partially Obstructed	no	NA	NA	NA	17	52.5	86.3	17.8	1859.55814	2017-08-14	12:20:00	NA	NA	https://storage.googleapis.com/elegansvariation.org/photos/hawaii2017/C-0352.thumb.jpg	Leaf litter
NA	NA	C-0353	NA	No	NA	22.199775	-159.474708	Kauai	Wild forest	Partially Obstructed	no	NA	NA	NA	24.5	40.5	81.4	25.666666666666668	65.81766382	2017-08-10	08:58:00	NA	NA	https://storage.googleapis.com/elegansvariation.org/photos/hawaii2017/C-0353.thumb.jpg	Leaf litter
NA	NA	C-0354	S-06612	Yes	Some (11-25)	20.951715	-156.533814	Maui	Wild forest	Partially Obstructed	no	NA	NA	NA	27.2	28	81.9	24.3	378	2017-08-13	15:18:00	0	Unknown	https://storage.googleapis.com/elegansvariation.org/photos/hawaii2017/C-0354.thumb.jpg	Leaf litter
NA	NA	C-0354	S-06613	Yes	Some (11-25)	20.951715	-156.533814	Maui	Wild forest	Partially Obstructed	no	NA	NA	NA	27.2	28	81.9	24.3	378	2017-08-13	15:18:00	0	Unknown	https://storage.googleapis.com/elegansvariation.org/photos/hawaii2017/C-0354.thumb.jpg	Leaf litter
NA	NA	C-0354	S-06614	Yes	Some (11-25)	20.951715	-156.533814	Maui	Wild forest	Partially Obstructed	no	NA	NA	NA	27.2	28	81.9	24.3	378	2017-08-13	15:18:00	0	Unknown	https://storage.googleapis.com/elegansvariation.org/photos/hawaii2017/C-0354.thumb.jpg	Leaf litter
NA	NA	C-0354	S-06615	Yes	Some (11-25)	20.951715	-156.533814	Maui	Wild forest	Partially Obstructed	no	NA	NA	NA	27.2	28	81.9	24.3	378	2017-08-13	15:18:00	0	Unknown	https://storage.googleapis.com/elegansvariation.org/photos/hawaii2017/C-0354.thumb.jpg	Leaf litter
NA	NA	C-0355	S-06521	Yes	Some (11-25)	20.948664	-156.536492	Maui	Wild forest	Partially Obstructed	no	NA	NA	NA	22.8	65.5	81.8	25.3	439.6501129	2017-08-13	16:26:00	1	C. briggsae	https://storage.googleapis.com/elegansvariation.org/photos/hawaii2017/C-0355.thumb.jpg	Fruit
NA	NA	C-0355	S-06526	Yes	Some (11-25)	20.948664	-156.536492	Maui	Wild forest	Partially Obstructed	no	NA	NA	NA	22.8	65.5	81.8	25.3	439.6501129	2017-08-13	16:26:00	1	C. briggsae	https://storage.googleapis.com/elegansvariation.org/photos/hawaii2017/C-0355.thumb.jpg	Fruit
NA	NA	C-0356	NA	No	NA	20.681069	-156.329594	Maui	Wild forest	Partially Obstructed	no	NA	NA	NA	14.9	70.5	83.6	17.8	1842.881579	2017-08-14	12:17:00	NA	NA	https://storage.googleapis.com/elegansvariation.org/photos/hawaii2017/C-0356.thumb.jpg	Leaf litter
NA	NA	C-0357	NA	No	NA	22.199572	-159.474656	Kauai	Wild forest	Partially Obstructed	no	NA	NA	NA	25	54.5	76.5	18.5	68.50059595	2017-08-10	08:59:00	NA	NA	https://storage.googleapis.com/elegansvariation.org/photos/hawaii2017/C-0357.thumb.jpg	Leaf litter
NA	NA	C-0358	NA	No	NA	20.951076	-156.534407	Maui	Wild forest	Partially Obstructed	no	NA	NA	NA	30.1	70.5	80	25.6	398	2017-08-13	15:21:00	NA	NA	https://storage.googleapis.com/elegansvariation.org/photos/hawaii2017/C-0358.thumb.jpg	Fruit
NA	NA	C-0359	S-06541	Yes	Very Few (1-3)	20.948678	-156.535675	Maui	Wild forest	Partially Obstructed	no	NA	NA	NA	22.4	63	83.3	24.7	424.992126	2017-08-13	16:31:00	0	Unknown	https://storage.googleapis.com/elegansvariation.org/photos/hawaii2017/C-0359.thumb.jpg	Fungus
NA	NA	C-0359	S-06547	Yes	Very Few (1-3)	20.948678	-156.535675	Maui	Wild forest	Partially Obstructed	no	NA	NA	NA	22.4	63	83.3	24.7	424.992126	2017-08-13	16:31:00	0	Unknown	https://storage.googleapis.com/elegansvariation.org/photos/hawaii2017/C-0359.thumb.jpg	Fungus
NA	NA	C-0360	S-06589	Yes	Very Few (1-3)	20.674525	-156.339425	Maui	Wild forest	Partially Obstructed	no	NA	NA	NA	15.3	70.5	92.6	16.4	1722.490566	2017-08-14	10:59:00	0	Unknown	https://storage.googleapis.com/elegansvariation.org/photos/hawaii2017/C-0360.thumb.jpg	Leaf litter
NA	NA	C-0361	S-06675	Yes	Very Few (1-3)	20.673981	-156.339942	Maui	Wild forest	Partially Obstructed	no	NA	NA	NA	15	72.5	91.6	16.4	1761.4608700000001	2017-08-14	10:54:00	NA	NA	https://storage.googleapis.com/elegansvariation.org/photos/hawaii2017/C-0361.thumb.jpg	Leaf litter
NA	NA	C-0362	NA	No	NA	22.13011428	-159.6577895	Kauai	Urban garden	Full	no	NA	NA	NA	33.7	57	61	24	1118	2017-08-10	09:59:00	NA	NA	https://storage.googleapis.com/elegansvariation.org/photos/hawaii2017/C-0362.thumb.jpg	Flower
NA	NA	C-0363	NA	No	NA	22.131558	-159.660433	Kauai	Wild forest	Partially Obstructed	yes	10	D	3	19.2	37	63.1	23.3	1157.66129	2017-08-10	11:22:00	NA	NA	https://storage.googleapis.com/elegansvariation.org/photos/hawaii2017/C-0363.thumb.jpg	Leaf litter
NA	NA	C-0364	S-06704	Yes	Very Few (1-3)	20.794097	-156.051429	Maui	Wild forest	Partially Obstructed	no	NA	NA	NA	27.5	62.5	76.9	26.3	183	2017-08-15	09:48:00	0	Unknown	https://storage.googleapis.com/elegansvariation.org/photos/hawaii2017/C-0364.thumb.jpg	Vegetation
NA	NA	C-0365	S-06558	Yes	Some (11-25)	20.674169	-156.339758	Maui	Wild forest	Partially Obstructed	no	NA	NA	NA	15.6	70.5	90.6	17.1	1746.755319	2017-08-14	10:58:00	1	C. elegans	https://storage.googleapis.com/elegansvariation.org/photos/hawaii2017/C-0365.thumb.jpg	Leaf litter
NA	NA	C-0365	S-06587	Yes	Some (11-25)	20.674169	-156.339758	Maui	Wild forest	Partially Obstructed	no	NA	NA	NA	15.6	70.5	90.6	17.1	1746.755319	2017-08-14	10:58:00	1	C. elegans	https://storage.googleapis.com/elegansvariation.org/photos/hawaii2017/C-0365.thumb.jpg	Leaf litter
NA	NA	C-0366	NA	No	NA	22.1144129	-159.6718773	Kauai	Wild forest	Partially Obstructed	no	NA	NA	NA	19.6	58	62.3	24	1088	2017-08-10	10:26:00	NA	NA	https://storage.googleapis.com/elegansvariation.org/photos/hawaii2017/C-0366.thumb.jpg	Leaf litter
NA	NA	C-0367	NA	No	NA	22.131542	-159.660478	Kauai	Wild forest	Partially Obstructed	yes	10	E	3	19.5	44.5	60.5	23.3	1164.804878	2017-08-10	11:26:00	NA	NA	https://storage.googleapis.com/elegansvariation.org/photos/hawaii2017/C-0367.thumb.jpg	Leaf litter
NA	NA	C-0368	S-06685	Yes	Very Few (1-3)	20.798997	-156.073466	Maui	Wild forest	Partially Obstructed	no	NA	NA	NA	22.3	65.5	71	27	267	2017-08-15	09:50:00	0	Unknown	https://storage.googleapis.com/elegansvariation.org/photos/hawaii2017/C-0368.thumb.jpg	Leaf litter
NA	NA	C-0369	NA	No	NA	20.6738	-156.332969	Maui	Wild forest	Obstructed	no	NA	NA	NA	11.2	50	85.7	16.4	1931.556701	2017-08-14	09:28:00	NA	NA	https://storage.googleapis.com/elegansvariation.org/photos/hawaii2017/C-0369.thumb.jpg	Fungus
NA	NA	C-0370	NA	No	NA	22.1145742	-159.6716998	Kauai	Wild forest	Partially Obstructed	no	NA	NA	NA	19.8	55	64.4	23.3	1088	2017-08-10	10:29:00	NA	NA	https://storage.googleapis.com/elegansvariation.org/photos/hawaii2017/C-0370.thumb.jpg	Vegetation
NA	NA	C-0371	NA	No	NA	22.131447	-159.660511	Kauai	Wild forest	Partially Obstructed	yes	10	F	3	19.1	53	63	22.6	1160.516667	2017-08-10	11:28:00	NA	NA	https://storage.googleapis.com/elegansvariation.org/photos/hawaii2017/C-0371.thumb.jpg	Leaf litter
NA	NA	C-0372	S-06779	Yes	Some (11-25)	20.803007	-156.080635	Maui	Wild forest	Partially Obstructed	no	NA	NA	NA	23.6	66	72.5	27	278	2017-08-15	09:57:00	0	Unknown	https://storage.googleapis.com/elegansvariation.org/photos/hawaii2017/C-0372.thumb.jpg	Leaf litter
NA	NA	C-0372	S-06780	Yes	Some (11-25)	20.803007	-156.080635	Maui	Wild forest	Partially Obstructed	no	NA	NA	NA	23.6	66	72.5	27	278	2017-08-15	09:57:00	0	Unknown	https://storage.googleapis.com/elegansvariation.org/photos/hawaii2017/C-0372.thumb.jpg	Leaf litter
NA	NA	C-0372	S-06781	Yes	Some (11-25)	20.803007	-156.080635	Maui	Wild forest	Partially Obstructed	no	NA	NA	NA	23.6	66	72.5	27	278	2017-08-15	09:57:00	0	Unknown	https://storage.googleapis.com/elegansvariation.org/photos/hawaii2017/C-0372.thumb.jpg	Leaf litter
NA	NA	C-0373	S-06646	Yes	Very Few (1-3)	20.673522	-156.332881	Maui	Wild forest	Partially Obstructed	no	NA	NA	NA	12.5	68	84.2	15.7	1936.315789	2017-08-14	09:30:00	0	Unknown	https://storage.googleapis.com/elegansvariation.org/photos/hawaii2017/C-0373.thumb.jpg	Vegetation
NA	NA	C-0374	NA	No	NA	22.1150324	-159.6716988	Kauai	Wild forest	Partially Obstructed	no	NA	NA	NA	19.2	57	68.6	22.6	1078	2017-08-10	10:31:00	NA	NA	https://storage.googleapis.com/elegansvariation.org/photos/hawaii2017/C-0374.thumb.jpg	Leaf litter
NA	NA	C-0375	NA	No	NA	22.1314956	-159.6604613	Kauai	Wild forest	Partially Obstructed	yes	10	A	0	19.5	50.5	62.5	23.3	1157	2017-08-10	11:30:00	NA	NA	https://storage.googleapis.com/elegansvariation.org/photos/hawaii2017/C-0375.thumb.jpg	Leaf litter
NA	NA	C-0376	S-06708	Yes	Some (11-25)	20.807325	-156.096083	Maui	Wild forest	Partially Obstructed	no	NA	NA	NA	23.5	64.5	84.9	24.3	295	2017-08-15	10:00:00	1	C. briggsae	https://storage.googleapis.com/elegansvariation.org/photos/hawaii2017/C-0376.thumb.jpg	Fruit
NA	NA	C-0376	S-06709	Yes	Some (11-25)	20.807325	-156.096083	Maui	Wild forest	Partially Obstructed	no	NA	NA	NA	23.5	64.5	84.9	24.3	295	2017-08-15	10:00:00	1	C. briggsae	https://storage.googleapis.com/elegansvariation.org/photos/hawaii2017/C-0376.thumb.jpg	Fruit
NA	NA	C-0377	NA	No	NA	20.673239	-156.332497	Maui	Wild forest	Partially Obstructed	no	NA	NA	NA	13.6	52.5	87.7	15.7	1936.234848	2017-08-14	09:34:00	NA	NA	https://storage.googleapis.com/elegansvariation.org/photos/hawaii2017/C-0377.thumb.jpg	Leaf litter
NA	NA	C-0378	NA	No	NA	22.134183	-159.664014	Kauai	Wild forest	Partially Obstructed	no	NA	NA	NA	24	67.5	62.7	24.2	1067.691729	2017-08-10	12:07:00	NA	NA	https://storage.googleapis.com/elegansvariation.org/photos/hawaii2017/C-0378.thumb.jpg	Fruit
NA	NA	C-0379	S-05811	Yes	Proliferating (25+)	22.131743	-159.66019	Kauai	Wild forest	Obstructed	no	NA	NA	NA	19.7	66.5	64.5	22.6	1155	2017-08-10	11:37:00	0	Unknown	https://storage.googleapis.com/elegansvariation.org/photos/hawaii2017/C-0379.thumb.jpg	Leaf litter
NA	NA	C-0379	S-05812	Yes	Proliferating (25+)	22.131743	-159.66019	Kauai	Wild forest	Obstructed	no	NA	NA	NA	19.7	66.5	64.5	22.6	1155	2017-08-10	11:37:00	0	Unknown	https://storage.googleapis.com/elegansvariation.org/photos/hawaii2017/C-0379.thumb.jpg	Leaf litter
NA	NA	C-0380	S-06686	Yes	Proliferating (25+)	20.807406	-156.096654	Maui	Wild forest	Partially Obstructed	no	NA	NA	NA	25.4	69	81.2	24.3	291	2017-08-15	10:10:00	1	C. briggsae	https://storage.googleapis.com/elegansvariation.org/photos/hawaii2017/C-0380.thumb.jpg	Fruit
NA	NA	C-0380	S-06687	Yes	Proliferating (25+)	20.807406	-156.096654	Maui	Wild forest	Partially Obstructed	no	NA	NA	NA	25.4	69	81.2	24.3	291	2017-08-15	10:10:00	1	C. tropicalis	https://storage.googleapis.com/elegansvariation.org/photos/hawaii2017/C-0380.thumb.jpg	Fruit
NA	NA	C-0380	S-06688	Yes	Proliferating (25+)	20.807406	-156.096654	Maui	Wild forest	Partially Obstructed	no	NA	NA	NA	25.4	69	81.2	24.3	291	2017-08-15	10:10:00	1	C. briggsae	https://storage.googleapis.com/elegansvariation.org/photos/hawaii2017/C-0380.thumb.jpg	Fruit
NA	NA	C-0380	S-06689	Yes	Proliferating (25+)	20.807406	-156.096654	Maui	Wild forest	Partially Obstructed	no	NA	NA	NA	25.4	69	81.2	24.3	291	2017-08-15	10:10:00	1	C. briggsae	https://storage.googleapis.com/elegansvariation.org/photos/hawaii2017/C-0380.thumb.jpg	Fruit
NA	NA	C-0380	S-06690	Yes	Proliferating (25+)	20.807406	-156.096654	Maui	Wild forest	Partially Obstructed	no	NA	NA	NA	25.4	69	81.2	24.3	291	2017-08-15	10:10:00	1	C. tropicalis	https://storage.googleapis.com/elegansvariation.org/photos/hawaii2017/C-0380.thumb.jpg	Fruit
NA	NA	C-0380	S-06692	Yes	Proliferating (25+)	20.807406	-156.096654	Maui	Wild forest	Partially Obstructed	no	NA	NA	NA	25.4	69	81.2	24.3	291	2017-08-15	10:10:00	1	C. briggsae	https://storage.googleapis.com/elegansvariation.org/photos/hawaii2017/C-0380.thumb.jpg	Fruit
NA	NA	C-0381	NA	Tracks	NA	20.6759	-156.332556	Maui	Wild forest	Partially Obstructed	no	NA	NA	NA	10.8	51	76	17.1	1896.617021	2017-08-14	09:16:00	NA	NA	https://storage.googleapis.com/elegansvariation.org/photos/hawaii2017/C-0381.thumb.jpg	Leaf litter
NA	NA	C-0382	NA	No	NA	22.1155139	-159.6718528	Kauai	Wild forest	Partially Obstructed	no	NA	NA	NA	19.6	21	67.6	22.6	1073	2017-08-10	10:33:00	NA	NA	https://storage.googleapis.com/elegansvariation.org/photos/hawaii2017/C-0382.thumb.jpg	Fruit
NA	NA	C-0383	NA	No	NA	22.131669	-159.660447	Kauai	Wild forest	Partially Obstructed	no	NA	NA	NA	21.7	28	63.3	24	1128.676056	2017-08-10	11:42:00	NA	NA	https://storage.googleapis.com/elegansvariation.org/photos/hawaii2017/C-0383.thumb.jpg	Fruit
NA	NA	C-0384	NA	Tracks	NA	20.80732	-156.097159	Maui	Wild forest	Partially Obstructed	no	NA	NA	NA	24.1	66	85.8	24.3	295	2017-08-15	10:10:00	NA	NA	https://storage.googleapis.com/elegansvariation.org/photos/hawaii2017/C-0384.thumb.jpg	Leaf litter
NA	NA	C-0385	NA	Tracks	NA	20.674186	-156.333278	Maui	Wild forest	Partially Obstructed	no	NA	NA	NA	13.5	67	81.3	17.8	1935.904523	2017-08-14	09:24:00	NA	NA	https://storage.googleapis.com/elegansvariation.org/photos/hawaii2017/C-0385.thumb.jpg	Fungus
NA	NA	C-0386	NA	No	NA	22.1143876	-159.6718576	Kauai	Wild forest	Partially Obstructed	no	NA	NA	NA	20.5	NA	60	23.3	1088	2017-08-10	10:27:00	NA	NA	https://storage.googleapis.com/elegansvariation.org/photos/hawaii2017/C-0386.thumb.jpg	Fruit
NA	NA	C-0387	NA	No	NA	22.133317	-159.660856	Kauai	Wild forest	Obstructed	no	NA	NA	NA	21.8	66	60.3	24.7	1120.867925	2017-08-10	11:55:00	NA	NA	https://storage.googleapis.com/elegansvariation.org/photos/hawaii2017/C-0387.thumb.jpg	Leaf litter
NA	NA	C-0388	NA	Tracks	NA	20.807294	-156.097072	Maui	Wild forest	Partially Obstructed	no	NA	NA	NA	22.9	65	82.4	24.3	291	2017-08-15	10:14:00	NA	NA	https://storage.googleapis.com/elegansvariation.org/photos/hawaii2017/C-0388.thumb.jpg	Leaf litter
NA	NA	C-0389	NA	Tracks	NA	20.672508	-156.332317	Maui	Wild forest	Partially Obstructed	no	NA	NA	NA	16.3	60.5	94	15.7	1936.464286	2017-08-14	09:38:00	NA	NA	https://storage.googleapis.com/elegansvariation.org/photos/hawaii2017/C-0389.thumb.jpg	Leaf litter
NA	NA	C-0390	S-05695	Yes	Proliferating (25+)	22.116089	-159.671714	Kauai	Wild forest	Partially Obstructed	no	NA	NA	NA	19.3	61.5	65.6	22.6	1073	2017-08-10	10:36:00	0	Unknown	https://storage.googleapis.com/elegansvariation.org/photos/hawaii2017/C-0390.thumb.jpg	Leaf litter
NA	NA	C-0390	S-05699	Yes	Proliferating (25+)	22.116089	-159.671714	Kauai	Wild forest	Partially Obstructed	no	NA	NA	NA	19.3	61.5	65.6	22.6	1073	2017-08-10	10:36:00	0	Unknown	https://storage.googleapis.com/elegansvariation.org/photos/hawaii2017/C-0390.thumb.jpg	Leaf litter
NA	NA	C-0390	S-05704	Yes	Proliferating (25+)	22.116089	-159.671714	Kauai	Wild forest	Partially Obstructed	no	NA	NA	NA	19.3	61.5	65.6	22.6	1073	2017-08-10	10:36:00	0	Unknown	https://storage.googleapis.com/elegansvariation.org/photos/hawaii2017/C-0390.thumb.jpg	Leaf litter
NA	NA	C-0391	NA	No	NA	22.132169	-159.660094	Kauai	Wild forest	Partially Obstructed	no	NA	NA	NA	21.3	20	61.9	23.3	1149.333973	2017-08-10	11:49:00	NA	NA	https://storage.googleapis.com/elegansvariation.org/photos/hawaii2017/C-0391.thumb.jpg	Fungus
NA	NA	C-0392	S-06770	Yes	Few (4-10)	20.8075552	-156.0966083	Maui	Wild forest	Partially Obstructed	no	NA	NA	NA	23	68.5	83.4	24.9	291	2017-08-15	10:15:00	1	C. briggsae	https://storage.googleapis.com/elegansvariation.org/photos/hawaii2017/C-0392.thumb.jpg	Leaf litter
NA	NA	C-0392	S-06771	Yes	Few (4-10)	20.8075552	-156.0966083	Maui	Wild forest	Partially Obstructed	no	NA	NA	NA	23	68.5	83.4	24.9	291	2017-08-15	10:15:00	1	C. briggsae	https://storage.googleapis.com/elegansvariation.org/photos/hawaii2017/C-0392.thumb.jpg	Leaf litter
NA	NA	C-0393	NA	Tracks	NA	20.674875	-156.333072	Maui	Wild forest	Partially Obstructed	no	NA	NA	NA	13.7	55	74.2	18.5	1908.117647	2017-08-14	09:21:00	NA	NA	https://storage.googleapis.com/elegansvariation.org/photos/hawaii2017/C-0393.thumb.jpg	Leaf litter
NA	NA	C-0394	S-05813	Yes	Proliferating (25+)	22.129439	-159.659747	Kauai	Wild forest	Partially Obstructed	no	NA	NA	NA	19.5	49	62.6	21.9	1111.221053	2017-08-10	10:58:00	0	Unknown	https://storage.googleapis.com/elegansvariation.org/photos/hawaii2017/C-0394.thumb.jpg	Leaf litter
NA	NA	C-0394	S-05814	Yes	Proliferating (25+)	22.129439	-159.659747	Kauai	Wild forest	Partially Obstructed	no	NA	NA	NA	19.5	49	62.6	21.9	1111.221053	2017-08-10	10:58:00	0	Unknown	https://storage.googleapis.com/elegansvariation.org/photos/hawaii2017/C-0394.thumb.jpg	Leaf litter
NA	NA	C-0395	NA	No	NA	22.133906	-159.661356	Kauai	Wild forest	Partially Obstructed	no	NA	NA	NA	22	24	60.8	24	1088.559441	2017-08-10	11:58:00	NA	NA	https://storage.googleapis.com/elegansvariation.org/photos/hawaii2017/C-0395.thumb.jpg	Fungus
NA	NA	C-0396	NA	No	NA	20.8073683	-156.0967159	Maui	Wild forest	Partially Obstructed	no	NA	NA	NA	24.4	68.5	82.9	24.6	291	2017-08-15	10:16:00	NA	NA	https://storage.googleapis.com/elegansvariation.org/photos/hawaii2017/C-0396.thumb.jpg	Flower
NA	NA	C-0397	S-06565	Yes	Very Few (1-3)	20.675433	-156.332864	Maui	Wild forest	Partially Obstructed	no	NA	NA	NA	11.1	57	72.2	16.4	1930.882576	2017-08-14	09:19:00	NA	NA	https://storage.googleapis.com/elegansvariation.org/photos/hawaii2017/C-0397.thumb.jpg	Leaf litter
NA	NA	C-0398	NA	No	NA	22.13115619	-159.6602421	Kauai	Wild forest	Partially Obstructed	no	NA	NA	NA	21.5	18	62.1	21.9	1145	2017-08-10	11:08:00	NA	NA	https://storage.googleapis.com/elegansvariation.org/photos/hawaii2017/C-0398.thumb.jpg	Fruit
NA	NA	C-0399	NA	No	NA	22.133772	-159.66215	Kauai	Wild forest	Obstructed	no	NA	NA	NA	20.8	64	62	24.7	1082.235294	2017-08-10	12:04:00	NA	NA	https://storage.googleapis.com/elegansvariation.org/photos/hawaii2017/C-0399.thumb.jpg	Invertebrate
NA	NA	C-0400	S-06757	Yes	Very Few (1-3)	20.8075	-156.096019	Maui	Wild forest	Partially Obstructed	no	NA	NA	NA	24.3	69.5	89.7	24.3	295	2017-08-15	10:19:00	NA	NA	https://storage.googleapis.com/elegansvariation.org/photos/hawaii2017/C-0400.thumb.jpg	Leaf litter
NA	NA	C-0401	NA	Tracks	NA	20.676389	-156.332306	Maui	Wild forest	Partially Obstructed	no	NA	NA	NA	11.7	67	74.5	17.1	1893.021978	2017-08-14	09:12:00	NA	NA	https://storage.googleapis.com/elegansvariation.org/photos/hawaii2017/C-0401.thumb.jpg	Leaf litter
NA	NA	C-0402	NA	No	NA	22.129553	-159.660122	Kauai	Wild forest	Partially Obstructed	no	NA	NA	NA	19.7	62.5	60.8	22.6	1119.67033	2017-08-10	11:02:00	NA	NA	https://storage.googleapis.com/elegansvariation.org/photos/hawaii2017/C-0402.thumb.jpg	Leaf litter
NA	NA	C-0403	S-06727	Yes	Few (4-10)	20.770049	-155.997712	Maui	Wild forest	Partially Obstructed	no	NA	NA	NA	24.6	62.5	77.9	25.3	59	2017-08-15	09:28:00	NA	NA	https://storage.googleapis.com/elegansvariation.org/photos/hawaii2017/C-0403.thumb.jpg	Leaf litter
NA	NA	C-0403	S-06728	Yes	Few (4-10)	20.770049	-155.997712	Maui	Wild forest	Partially Obstructed	no	NA	NA	NA	24.6	62.5	77.9	25.3	59	2017-08-15	09:28:00	0	Unknown	https://storage.googleapis.com/elegansvariation.org/photos/hawaii2017/C-0403.thumb.jpg	Leaf litter
NA	NA	C-0404	NA	Tracks	NA	20.807562	-156.095849	Maui	Wild forest	Partially Obstructed	no	NA	NA	NA	22.9	59	76.1	24.9	295	2017-08-15	10:20:00	NA	NA	https://storage.googleapis.com/elegansvariation.org/photos/hawaii2017/C-0404.thumb.jpg	Leaf litter
NA	NA	C-0405	S-06579	Yes	Very Few (1-3)	20.677	-156.330583	Maui	Wild forest	Full	no	NA	NA	NA	9.9	45	56.4	21.2	1881.514706	2017-08-14	08:57:00	0	Unknown	https://storage.googleapis.com/elegansvariation.org/photos/hawaii2017/C-0405.thumb.jpg	Vegetation
NA	NA	C-0406	S-05805	Yes	Proliferating (25+)	22.131269	-159.660294	Kauai	Wild forest	Partially Obstructed	yes	10	A	3	18.7	67.5	62.2	24	1159.721649	2017-08-10	11:14:00	0	Unknown	https://storage.googleapis.com/elegansvariation.org/photos/hawaii2017/C-0406.thumb.jpg	Leaf litter
NA	NA	C-0406	S-05806	Yes	Proliferating (25+)	22.131269	-159.660294	Kauai	Wild forest	Partially Obstructed	yes	10	A	3	18.7	67.5	62.2	24	1159.721649	2017-08-10	11:14:00	0	Unknown	https://storage.googleapis.com/elegansvariation.org/photos/hawaii2017/C-0406.thumb.jpg	Leaf litter
NA	NA	C-0407	NA	Tracks	NA	20.779735	-156.003034	Maui	Wild forest	Partially Obstructed	no	NA	NA	NA	24	70.5	85.5	24.9	61	2017-08-15	09:31:00	NA	NA	https://storage.googleapis.com/elegansvariation.org/photos/hawaii2017/C-0407.thumb.jpg	Fruit
NA	NA	C-0408	S-06719	Yes	Some (11-25)	20.809703	-156.10957200000001	Maui	Wild forest	Partially Obstructed	no	NA	NA	NA	24.9	49.9	79	24.3	335	2017-08-15	10:29:00	1	C. briggsae	https://storage.googleapis.com/elegansvariation.org/photos/hawaii2017/C-0408.thumb.jpg	Flower
NA	NA	C-0408	S-06720	Yes	Some (11-25)	20.809703	-156.10957200000001	Maui	Wild forest	Partially Obstructed	no	NA	NA	NA	24.9	49.9	79	24.3	335	2017-08-15	10:29:00	NA	NA	https://storage.googleapis.com/elegansvariation.org/photos/hawaii2017/C-0408.thumb.jpg	Flower
NA	NA	C-0409	S-06530	Yes	Very Few (1-3)	20.676817	-156.331256	Maui	Wild forest	Full	no	NA	NA	NA	29	27	44.7	30.2	1890.709091	2017-08-14	09:02:00	0	Unknown	https://storage.googleapis.com/elegansvariation.org/photos/hawaii2017/C-0409.thumb.jpg	Leaf litter
NA	NA	C-0409	S-06531	Yes	Very Few (1-3)	20.676817	-156.331256	Maui	Wild forest	Full	no	NA	NA	NA	29	27	44.7	30.2	1890.709091	2017-08-14	09:02:00	0	Unknown	https://storage.googleapis.com/elegansvariation.org/photos/hawaii2017/C-0409.thumb.jpg	Leaf litter
NA	NA	C-0410	NA	No	NA	22.13025	-159.660286	Kauai	Wild forest	Partially Obstructed	no	NA	NA	NA	19.8	25	62.4	22.5	1136.356322	2017-08-10	11:05:00	NA	NA	https://storage.googleapis.com/elegansvariation.org/photos/hawaii2017/C-0410.thumb.jpg	Leaf litter
NA	NA	C-0411	S-06635	Yes	Few (4-10)	20.78425	-156.030819	Maui	Wild forest	Partially Obstructed	NA	NA	NA	NA	26.9	52.5	77.9	27	111	2017-08-15	09:40:00	0	Unknown	https://storage.googleapis.com/elegansvariation.org/photos/hawaii2017/C-0411.thumb.jpg	Flower
NA	NA	C-0411	S-06636	Yes	Few (4-10)	20.78425	-156.030819	Maui	Wild forest	Partially Obstructed	NA	NA	NA	NA	26.9	52.5	77.9	27	111	2017-08-15	09:40:00	NA	NA	https://storage.googleapis.com/elegansvariation.org/photos/hawaii2017/C-0411.thumb.jpg	Flower
NA	NA	C-0411	S-06639	Yes	Few (4-10)	20.78425	-156.030819	Maui	Wild forest	Partially Obstructed	NA	NA	NA	NA	26.9	52.5	77.9	27	111	2017-08-15	09:40:00	0	Unknown	https://storage.googleapis.com/elegansvariation.org/photos/hawaii2017/C-0411.thumb.jpg	Flower
NA	NA	C-0411	S-06644	Yes	Few (4-10)	20.78425	-156.030819	Maui	Wild forest	Partially Obstructed	NA	NA	NA	NA	26.9	52.5	77.9	27	111	2017-08-15	09:40:00	NA	NA	https://storage.googleapis.com/elegansvariation.org/photos/hawaii2017/C-0411.thumb.jpg	Flower
NA	NA	C-0412	S-06751	Yes	Some (11-25)	20.8117026	-156.1128122	Maui	Wild forest	Partially Obstructed	no	NA	NA	NA	25.5	65.5	87.8	22.9	366	2017-08-15	10:34:00	1	C. briggsae	https://storage.googleapis.com/elegansvariation.org/photos/hawaii2017/C-0412.thumb.jpg	Flower
NA	NA	C-0412	S-06752	Yes	Some (11-25)	20.8117026	-156.1128122	Maui	Wild forest	Partially Obstructed	no	NA	NA	NA	25.5	65.5	87.8	22.9	366	2017-08-15	10:34:00	1	C. briggsae	https://storage.googleapis.com/elegansvariation.org/photos/hawaii2017/C-0412.thumb.jpg	Flower
NA	NA	C-0412	S-06753	Yes	Some (11-25)	20.8117026	-156.1128122	Maui	Wild forest	Partially Obstructed	no	NA	NA	NA	25.5	65.5	87.8	22.9	366	2017-08-15	10:34:00	1	C. briggsae	https://storage.googleapis.com/elegansvariation.org/photos/hawaii2017/C-0412.thumb.jpg	Flower
NA	NA	C-0412	S-06754	Yes	Some (11-25)	20.8117026	-156.1128122	Maui	Wild forest	Partially Obstructed	no	NA	NA	NA	25.5	65.5	87.8	22.9	366	2017-08-15	10:34:00	1	C. briggsae	https://storage.googleapis.com/elegansvariation.org/photos/hawaii2017/C-0412.thumb.jpg	Flower
NA	NA	C-0412	S-06755	Yes	Some (11-25)	20.8117026	-156.1128122	Maui	Wild forest	Partially Obstructed	no	NA	NA	NA	25.5	65.5	87.8	22.9	366	2017-08-15	10:34:00	1	C. briggsae	https://storage.googleapis.com/elegansvariation.org/photos/hawaii2017/C-0412.thumb.jpg	Flower
NA	NA	C-0412	S-06763	Yes	Some (11-25)	20.8117026	-156.1128122	Maui	Wild forest	Partially Obstructed	no	NA	NA	NA	25.5	65.5	87.8	22.9	366	2017-08-15	10:34:00	1	C. briggsae	https://storage.googleapis.com/elegansvariation.org/photos/hawaii2017/C-0412.thumb.jpg	Flower
NA	NA	C-0413	NA	No	NA	20.676756	-156.331653	Maui	Wild forest	Partially Obstructed	no	NA	NA	NA	11.1	45	60.3	20.5	1889.304348	2017-08-14	09:09:00	NA	NA	https://storage.googleapis.com/elegansvariation.org/photos/hawaii2017/C-0413.thumb.jpg	Fruit
NA	NA	C-0414	NA	No	NA	22.131561	-159.660406	Kauai	Wild forest	Partially Obstructed	yes	10	B	3	19.4	52	60.3	24	1163.346939	2017-08-10	11:17:00	NA	NA	https://storage.googleapis.com/elegansvariation.org/photos/hawaii2017/C-0414.thumb.jpg	Leaf litter
NA	NA	C-0415	NA	No	NA	20.78249	-156.009784	Maui	Wild forest	Partially Obstructed	no	NA	NA	NA	24.8	69.5	82.9	25.6	73	2017-08-15	09:33:00	NA	NA	https://storage.googleapis.com/elegansvariation.org/photos/hawaii2017/C-0415.thumb.jpg	Leaf litter
NA	NA	C-0416	S-06625	Yes	Few (4-10)	20.8131	-156.116768	Maui	Wild forest	Partially Obstructed	no	NA	NA	NA	22	67	86.8	22.9	376	2017-08-15	10:37:00	NA	NA	https://storage.googleapis.com/elegansvariation.org/photos/hawaii2017/C-0416.thumb.jpg	Leaf litter
NA	NA	C-0416	S-06626	Yes	Few (4-10)	20.8131	-156.116768	Maui	Wild forest	Partially Obstructed	no	NA	NA	NA	22	67	86.8	22.9	376	2017-08-15	10:37:00	0	Unknown	https://storage.googleapis.com/elegansvariation.org/photos/hawaii2017/C-0416.thumb.jpg	Leaf litter
NA	NA	C-0417	NA	Tracks	NA	20.672228	-156.332561	Maui	Wild forest	Partially Obstructed	no	NA	NA	NA	25.9	45	80.9	17.8	1952.779412	2017-08-14	09:40:00	NA	NA	https://storage.googleapis.com/elegansvariation.org/photos/hawaii2017/C-0417.thumb.jpg	Leaf litter
NA	NA	C-0418	S-05793	Yes	Very Few (1-3)	22.131522	-159.660467	Kauai	Wild forest	Partially Obstructed	yes	10	C	3	18.3	48	64.3	23.3	1165.131455	2017-08-10	11:20:00	1	C. briggsae	https://storage.googleapis.com/elegansvariation.org/photos/hawaii2017/C-0418.thumb.jpg	Leaf litter
NA	NA	C-0419	S-06655	Yes	Very Few (1-3)	20.793231	-156.046589	Maui	Wild forest	Partially Obstructed	no	NA	NA	NA	24.1	64.5	75.6	27	163	2017-08-15	09:43:00	NA	NA	https://storage.googleapis.com/elegansvariation.org/photos/hawaii2017/C-0419.thumb.jpg	Leaf litter
NA	NA	C-0420	S-06697	Yes	Few (4-10)	20.813647	-156.118573	Maui	Wild forest	Partially Obstructed	no	NA	NA	NA	24.3	66	86.3	24.9	389	2017-08-15	10:40:00	0	Unknown	https://storage.googleapis.com/elegansvariation.org/photos/hawaii2017/C-0420.thumb.jpg	Leaf litter
NA	NA	C-0420	S-06715	Yes	Few (4-10)	20.813647	-156.118573	Maui	Wild forest	Partially Obstructed	no	NA	NA	NA	24.3	66	86.3	24.9	389	2017-08-15	10:40:00	1	C. tropicalis	https://storage.googleapis.com/elegansvariation.org/photos/hawaii2017/C-0420.thumb.jpg	Leaf litter
NA	NA	C-0421	S-05554	Yes	Proliferating (25+)	22.081969	-159.426169	Kauai	Wild forest	Partially Obstructed	no	NA	NA	NA	22.8	NA	95.6	24.3	301.0834512	2017-08-09	08:47:00	1	C. briggsae	https://storage.googleapis.com/elegansvariation.org/photos/hawaii2017/C-0421.thumb.jpg	Fungus
NA	NA	C-0421	S-05568	Yes	Proliferating (25+)	22.081969	-159.426169	Kauai	Wild forest	Partially Obstructed	no	NA	NA	NA	22.8	NA	95.6	24.3	301.0834512	2017-08-09	08:47:00	1	C. briggsae	https://storage.googleapis.com/elegansvariation.org/photos/hawaii2017/C-0421.thumb.jpg	Fungus
NA	NA	C-0421	S-05573	Yes	Proliferating (25+)	22.081969	-159.426169	Kauai	Wild forest	Partially Obstructed	no	NA	NA	NA	22.8	NA	95.6	24.3	301.0834512	2017-08-09	08:47:00	1	C. briggsae	https://storage.googleapis.com/elegansvariation.org/photos/hawaii2017/C-0421.thumb.jpg	Fungus
NA	NA	C-0421	S-05574	Yes	Proliferating (25+)	22.081969	-159.426169	Kauai	Wild forest	Partially Obstructed	no	NA	NA	NA	22.8	NA	95.6	24.3	301.0834512	2017-08-09	08:47:00	NA	NA	https://storage.googleapis.com/elegansvariation.org/photos/hawaii2017/C-0421.thumb.jpg	Fungus
NA	NA	C-0422	S-05626	Yes	Few (4-10)	22.082511	-159.426061	Kauai	Wild forest	Partially Obstructed	no	NA	NA	NA	23.6	NA	93.7	24.3	303.0532544	2017-08-09	08:51:00	NA	NA	https://storage.googleapis.com/elegansvariation.org/photos/hawaii2017/C-0422.thumb.jpg	Fruit
NA	NA	C-0422	S-05627	Yes	Few (4-10)	22.082511	-159.426061	Kauai	Wild forest	Partially Obstructed	no	NA	NA	NA	23.6	NA	93.7	24.3	303.0532544	2017-08-09	08:51:00	NA	NA	https://storage.googleapis.com/elegansvariation.org/photos/hawaii2017/C-0422.thumb.jpg	Fruit
NA	NA	C-0423	S-05579	Yes	Some (11-25)	22.075014	-159.421142	Kauai	Wild forest	Full	no	NA	NA	NA	22.6	NA	95.1	23.6	242.0651801	2017-08-09	08:01:00	NA	NA	https://storage.googleapis.com/elegansvariation.org/photos/hawaii2017/C-0423.thumb.jpg	Flower
NA	NA	C-0423	S-05688	Yes	Some (11-25)	22.075014	-159.421142	Kauai	Wild forest	Full	no	NA	NA	NA	22.6	NA	95.1	23.6	242.0651801	2017-08-09	08:01:00	NA	NA	https://storage.googleapis.com/elegansvariation.org/photos/hawaii2017/C-0423.thumb.jpg	Flower
NA	NA	C-0424	S-05635	Yes	Proliferating (25+)	22.074664	-159.420817	Kauai	Wild forest	Full	no	NA	NA	NA	21.9	NA	94.1	22.9	235.0956522	2017-08-09	07:57:00	0	Unknown	https://storage.googleapis.com/elegansvariation.org/photos/hawaii2017/C-0424.thumb.jpg	Leaf litter
NA	NA	C-0424	S-05636	Yes	Proliferating (25+)	22.074664	-159.420817	Kauai	Wild forest	Full	no	NA	NA	NA	21.9	NA	94.1	22.9	235.0956522	2017-08-09	07:57:00	0	Unknown	https://storage.googleapis.com/elegansvariation.org/photos/hawaii2017/C-0424.thumb.jpg	Leaf litter
NA	NA	C-0424	S-05638	Yes	Proliferating (25+)	22.074664	-159.420817	Kauai	Wild forest	Full	no	NA	NA	NA	21.9	NA	94.1	22.9	235.0956522	2017-08-09	07:57:00	0	Unknown	https://storage.googleapis.com/elegansvariation.org/photos/hawaii2017/C-0424.thumb.jpg	Leaf litter
NA	NA	C-0425	NA	Tracks	NA	22.075144	-159.421236	Kauai	Wild forest	Partially Obstructed	no	NA	NA	NA	22.9	NA	91.2	23.6	247.6134969	2017-08-09	08:03:00	NA	NA	https://storage.googleapis.com/elegansvariation.org/photos/hawaii2017/C-0425.thumb.jpg	Leaf litter
NA	NA	C-0426	S-05565	Yes	Very Few (1-3)	22.076611	-159.422125	Kauai	Wild forest	Obstructed	no	NA	NA	NA	24.9	39	93.2	24.9	257.4634503	2017-08-09	08:09:00	NA	NA	https://storage.googleapis.com/elegansvariation.org/photos/hawaii2017/C-0426.thumb.jpg	Invertebrate
NA	NA	C-0426	S-05572	Yes	Very Few (1-3)	22.076611	-159.422125	Kauai	Wild forest	Obstructed	no	NA	NA	NA	24.9	39	93.2	24.9	257.4634503	2017-08-09	08:09:00	0	Unknown	https://storage.googleapis.com/elegansvariation.org/photos/hawaii2017/C-0426.thumb.jpg	Invertebrate
NA	NA	C-0427	NA	No	NA	22.077358	-159.422453	Kauai	Wild forest	Full	no	NA	NA	NA	24.4	36	92.7	24.3	258.2435897	2017-08-09	08:14:00	NA	NA	https://storage.googleapis.com/elegansvariation.org/photos/hawaii2017/C-0427.thumb.jpg	Invertebrate
NA	NA	C-0428	S-07505	Yes	Very Few (1-3)	22.078697	-159.422961	Kauai	Wild forest	Partially Obstructed	no	NA	NA	NA	22.5	NA	97	24.3	273.2050998	2017-08-09	08:20:00	0	Unknown	https://storage.googleapis.com/elegansvariation.org/photos/hawaii2017/C-0428.thumb.jpg	Leaf litter
NA	NA	C-0429	S-05676	Yes	Very Few (1-3)	22.079097	-159.423094	Kauai	Wild forest	Partially Obstructed	no	NA	NA	NA	23.2	37.5	94.2	24.3	275.7085202	2017-08-09	08:24:00	0	Unknown	https://storage.googleapis.com/elegansvariation.org/photos/hawaii2017/C-0429.thumb.jpg	Leaf litter
NA	NA	C-0429	S-05687	Yes	Very Few (1-3)	22.079097	-159.423094	Kauai	Wild forest	Partially Obstructed	no	NA	NA	NA	23.2	37.5	94.2	24.3	275.7085202	2017-08-09	08:24:00	0	Unknown	https://storage.googleapis.com/elegansvariation.org/photos/hawaii2017/C-0429.thumb.jpg	Leaf litter
NA	NA	C-0430	S-05205	Yes	Some (11-25)	22.083967	-159.426706	Kauai	Wild forest	Partially Obstructed	no	NA	NA	NA	24	33	90.7	24.3	310.3567839	2017-08-09	08:55:00	1	Oscheius sp.	https://storage.googleapis.com/elegansvariation.org/photos/hawaii2017/C-0430.thumb.jpg	Leaf litter
NA	NA	C-0430	S-05206	Yes	Some (11-25)	22.083967	-159.426706	Kauai	Wild forest	Partially Obstructed	no	NA	NA	NA	24	33	90.7	24.3	310.3567839	2017-08-09	08:55:00	0	Unknown	https://storage.googleapis.com/elegansvariation.org/photos/hawaii2017/C-0430.thumb.jpg	Leaf litter
NA	NA	C-0431	S-07501	Yes	Proliferating (25+)	22.07975	-159.423914	Kauai	Wild forest	Partially Obstructed	no	NA	NA	NA	23.8	38	90.4	24.9	275.3334699	2017-08-09	08:28:00	0	Unknown	https://storage.googleapis.com/elegansvariation.org/photos/hawaii2017/C-0431.thumb.jpg	Leaf litter
NA	NA	C-0431	S-07504	Yes	Proliferating (25+)	22.07975	-159.423914	Kauai	Wild forest	Partially Obstructed	no	NA	NA	NA	23.8	38	90.4	24.9	275.3334699	2017-08-09	08:28:00	0	Unknown	https://storage.googleapis.com/elegansvariation.org/photos/hawaii2017/C-0431.thumb.jpg	Leaf litter
NA	NA	C-0432	S-05186	Yes	Very Few (1-3)	22.087633	-159.427372	Kauai	Wild forest	Partially Obstructed	no	NA	NA	NA	22.6	69	92.4	24.9	327.4989691	2017-08-09	09:18:00	NA	NA	https://storage.googleapis.com/elegansvariation.org/photos/hawaii2017/C-0432.thumb.jpg	Leaf litter
NA	NA	C-0433	S-05577	Yes	Few (4-10)	22.088919	-159.427178	Kauai	Wild forest	Obstructed	no	NA	NA	NA	23	NA	90.9	24.9	344.4559271	2017-08-09	09:26:00	0	Unknown	https://storage.googleapis.com/elegansvariation.org/photos/hawaii2017/C-0433.thumb.jpg	Leaf litter
NA	NA	C-0433	S-05578	Yes	Few (4-10)	22.088919	-159.427178	Kauai	Wild forest	Obstructed	no	NA	NA	NA	23	NA	90.9	24.9	344.4559271	2017-08-09	09:26:00	1	C. briggsae	https://storage.googleapis.com/elegansvariation.org/photos/hawaii2017/C-0433.thumb.jpg	Leaf litter
NA	NA	C-0434	NA	No	NA	22.088803	-159.427186	Kauai	Wild forest	Partially Obstructed	no	NA	NA	NA	24.1	NA	93.4	24.9	346.962406	2017-08-09	09:33:00	NA	NA	https://storage.googleapis.com/elegansvariation.org/photos/hawaii2017/C-0434.thumb.jpg	Fungus
NA	NA	C-0435	S-05686	Yes	Very Few (1-3)	22.089911	-159.429611	Kauai	Wild forest	Partially Obstructed	no	NA	NA	NA	23.7	69	91.2	22.9	385.6958525	2017-08-09	09:38:00	NA	NA	https://storage.googleapis.com/elegansvariation.org/photos/hawaii2017/C-0435.thumb.jpg	Leaf litter
NA	NA	C-0436	NA	No	NA	22.090406	-159.430589	Kauai	Wild forest	Partially Obstructed	no	NA	NA	NA	23.2	NA	88.8	26.3	389.1758242	2017-08-09	09:46:00	NA	NA	https://storage.googleapis.com/elegansvariation.org/photos/hawaii2017/C-0436.thumb.jpg	Leaf litter
NA	NA	C-0437	S-05486	Yes	Very Few (1-3)	22.079914	-159.424778	Kauai	Wild forest	Partially Obstructed	no	NA	NA	NA	22.9	NA	89.7	24.3	273.8802395	2017-08-09	08:32:00	NA	NA	https://storage.googleapis.com/elegansvariation.org/photos/hawaii2017/C-0437.thumb.jpg	Leaf litter
NA	NA	C-0438	NA	No	NA	22.080664	-159.425242	Kauai	Wild forest	Partially Obstructed	no	NA	NA	NA	22.7	NA	93.7	24.3	274.771875	2017-08-09	08:35:00	NA	NA	https://storage.googleapis.com/elegansvariation.org/photos/hawaii2017/C-0438.thumb.jpg	Flower
NA	NA	C-0439	S-07485	Yes	Very Few (1-3)	22.081256	-159.426103	Kauai	Wild forest	Obstructed	no	NA	NA	NA	22.7	NA	95.1	24.3	293.3616667	2017-08-09	08:40:00	NA	NA	https://storage.googleapis.com/elegansvariation.org/photos/hawaii2017/C-0439.thumb.jpg	Fungus
NA	NA	C-0440	S-05493	Yes	Some (11-25)	22.080756	-159.425275	Kauai	Wild forest	Partially Obstructed	no	NA	NA	NA	22.7	NA	93.2	24.3	275.7959184	2017-08-09	08:37:00	0	Unknown	https://storage.googleapis.com/elegansvariation.org/photos/hawaii2017/C-0440.thumb.jpg	Leaf litter
NA	NA	C-0440	S-05496	Yes	Some (11-25)	22.080756	-159.425275	Kauai	Wild forest	Partially Obstructed	no	NA	NA	NA	22.7	NA	93.2	24.3	275.7959184	2017-08-09	08:37:00	0	Unknown	https://storage.googleapis.com/elegansvariation.org/photos/hawaii2017/C-0440.thumb.jpg	Leaf litter
NA	NA	C-0440	S-05497	Yes	Some (11-25)	22.080756	-159.425275	Kauai	Wild forest	Partially Obstructed	no	NA	NA	NA	22.7	NA	93.2	24.3	275.7959184	2017-08-09	08:37:00	0	Unknown	https://storage.googleapis.com/elegansvariation.org/photos/hawaii2017/C-0440.thumb.jpg	Leaf litter
NA	NA	C-0441	NA	No	NA	22.081272	-159.426094	Kauai	Wild forest	Obstructed	no	NA	NA	NA	22.7	NA	94.1	24.3	293.2360656	2017-08-09	08:41:00	NA	NA	https://storage.googleapis.com/elegansvariation.org/photos/hawaii2017/C-0441.thumb.jpg	Fungus
NA	NA	C-0442	S-05473	Yes	Some (11-25)	22.08145	-159.426133	Kauai	Wild forest	Obstructed	no	NA	NA	NA	21.9	NA	91.4	24.3	294.7715232	2017-08-09	08:43:00	NA	NA	https://storage.googleapis.com/elegansvariation.org/photos/hawaii2017/C-0442.thumb.jpg	Leaf litter
NA	NA	C-0442	S-05485	Yes	Some (11-25)	22.08145	-159.426133	Kauai	Wild forest	Obstructed	no	NA	NA	NA	21.9	NA	91.4	24.3	294.7715232	2017-08-09	08:43:00	1	C. briggsae	https://storage.googleapis.com/elegansvariation.org/photos/hawaii2017/C-0442.thumb.jpg	Leaf litter
NA	NA	C-0443	NA	No	NA	22.084394	-159.426797	Kauai	Wild forest	Partially Obstructed	no	NA	NA	NA	23.7	37.5	86.8	24.3	301.942623	2017-08-09	08:57:00	NA	NA	https://storage.googleapis.com/elegansvariation.org/photos/hawaii2017/C-0443.thumb.jpg	Leaf litter
NA	NA	C-0444	S-05633	Yes	Few (4-10)	22.085308	-159.427136	Kauai	Wild forest	Partially Obstructed	no	NA	NA	NA	26	NA	84.2	26.3	309.1967655	2017-08-09	09:08:00	0	Unknown	https://storage.googleapis.com/elegansvariation.org/photos/hawaii2017/C-0444.thumb.jpg	Fruit
NA	NA	C-0444	S-05651	Yes	Few (4-10)	22.085308	-159.427136	Kauai	Wild forest	Partially Obstructed	no	NA	NA	NA	26	NA	84.2	26.3	309.1967655	2017-08-09	09:08:00	0	Unknown	https://storage.googleapis.com/elegansvariation.org/photos/hawaii2017/C-0444.thumb.jpg	Fruit
NA	NA	C-0445	S-05587	Yes	Some (11-25)	22.086603	-159.427886	Kauai	Wild forest	Partially Obstructed	no	NA	NA	NA	24.4	67	93.7	24.9	307.1366906	2017-08-09	09:14:00	0	Unknown	https://storage.googleapis.com/elegansvariation.org/photos/hawaii2017/C-0445.thumb.jpg	Leaf litter
NA	NA	C-0445	S-05588	Yes	Some (11-25)	22.086603	-159.427886	Kauai	Wild forest	Partially Obstructed	no	NA	NA	NA	24.4	67	93.7	24.9	307.1366906	2017-08-09	09:14:00	0	Unknown	https://storage.googleapis.com/elegansvariation.org/photos/hawaii2017/C-0445.thumb.jpg	Leaf litter
NA	NA	C-0446	NA	No	NA	22.07342818	-159.4153549	Kauai	Wild forest	Partially Obstructed	no	NA	NA	NA	23.2	44.5	89.8	25.3	219	2017-08-09	08:32:00	NA	NA	https://storage.googleapis.com/elegansvariation.org/photos/hawaii2017/C-0446.thumb.jpg	Flower
NA	NA	C-0447	NA	Tracks	NA	22.073392	-159.415408	Kauai	Wild forest	Partially Obstructed	no	NA	NA	NA	23.3	47	88.6	25.3	184.2280702	2017-08-09	08:28:00	NA	NA	https://storage.googleapis.com/elegansvariation.org/photos/hawaii2017/C-0447.thumb.jpg	Leaf litter
NA	NA	C-0448	S-05229	Yes	Few (4-10)	22.07237328	-159.4160708	Kauai	Wild forest	Partially Obstructed	no	NA	NA	NA	23	48	88.8	24.7	180	2017-08-09	08:18:00	0	Unknown	https://storage.googleapis.com/elegansvariation.org/photos/hawaii2017/C-0448.thumb.jpg	Fruit
NA	NA	C-0449	NA	Tracks	NA	22.075181	-159.414131	Kauai	Wild forest	Partially Obstructed	no	NA	NA	NA	24	48	98.3	24.7	210.5223214	2017-08-09	08:43:00	NA	NA	https://storage.googleapis.com/elegansvariation.org/photos/hawaii2017/C-0449.thumb.jpg	Fruit
NA	NA	C-0450	S-05555	Yes	Proliferating (25+)	22.071756	-159.417614	Kauai	Wild forest	Partially Obstructed	no	NA	NA	NA	22.6	41	87.7	24	159.3722222	2017-08-09	08:09:00	0	Unknown	https://storage.googleapis.com/elegansvariation.org/photos/hawaii2017/C-0450.thumb.jpg	Flower
NA	NA	C-0450	S-05569	Yes	Proliferating (25+)	22.071756	-159.417614	Kauai	Wild forest	Partially Obstructed	no	NA	NA	NA	22.6	41	87.7	24	159.3722222	2017-08-09	08:09:00	NA	NA	https://storage.googleapis.com/elegansvariation.org/photos/hawaii2017/C-0450.thumb.jpg	Flower
NA	NA	C-0451	S-05668	Yes	Some (11-25)	22.071583	-159.416544	Kauai	Wild forest	Partially Obstructed	no	NA	NA	NA	23.9	46.5	88.4	24	163.2886792	2017-08-09	08:13:00	0	Unknown	https://storage.googleapis.com/elegansvariation.org/photos/hawaii2017/C-0451.thumb.jpg	Leaf litter
NA	NA	C-0451	S-05685	Yes	Some (11-25)	22.071583	-159.416544	Kauai	Wild forest	Partially Obstructed	no	NA	NA	NA	23.9	46.5	88.4	24	163.2886792	2017-08-09	08:13:00	0	Unknown	https://storage.googleapis.com/elegansvariation.org/photos/hawaii2017/C-0451.thumb.jpg	Leaf litter
NA	NA	C-0452	NA	No	NA	22.043475	-159.663133	Kauai	Wild forest	Partially Obstructed	no	NA	NA	NA	18.8	62.5	36.2	29.5	33.13880126	2017-08-10	08:24:00	NA	NA	https://storage.googleapis.com/elegansvariation.org/photos/hawaii2017/C-0452.thumb.jpg	Leaf litter
NA	NA	C-0453	NA	No	NA	22.026739	-159.679911	Kauai	Wild forest	Full	no	NA	NA	NA	28.4	NA	61.5	28.000000000000004	613.96	2017-08-08	13:50:00	NA	NA	https://storage.googleapis.com/elegansvariation.org/photos/hawaii2017/C-0453.thumb.jpg	Fruit
NA	NA	C-0454	NA	No	NA	22.0298	-159.674919	Kauai	Wild forest	Full	no	NA	NA	NA	30.4	NA	58.8	28.11111111111111	658.7821782	2017-08-08	13:46:00	NA	NA	https://storage.googleapis.com/elegansvariation.org/photos/hawaii2017/C-0454.thumb.jpg	Fruit
NA	NA	C-0455	NA	No	NA	21.931828	-159.467992	Kauai	Wild forest	Partially Obstructed	no	NA	NA	NA	29.4	NA	60.5	29.499999999999996	144.5547786	2017-08-08	15:29:00	NA	NA	https://storage.googleapis.com/elegansvariation.org/photos/hawaii2017/C-0455.thumb.jpg	Flower
NA	NA	C-0456	S-05264	Yes	Proliferating (25+)	21.901075	-159.601247	Kauai	Wild forest	Full	no	NA	NA	NA	32.9	4.5	54	30.166666666666668	3.886935287	2017-08-08	14:19:00	0	Unknown	https://storage.googleapis.com/elegansvariation.org/photos/hawaii2017/C-0456.thumb.jpg	Leaf litter
NA	NA	C-0456	S-05272	Yes	Proliferating (25+)	21.901075	-159.601247	Kauai	Wild forest	Full	no	NA	NA	NA	32.9	4.5	54	30.166666666666668	3.886935287	2017-08-08	14:19:00	NA	NA	https://storage.googleapis.com/elegansvariation.org/photos/hawaii2017/C-0456.thumb.jpg	Leaf litter
NA	NA	C-0456	S-05280	Yes	Proliferating (25+)	21.901075	-159.601247	Kauai	Wild forest	Full	no	NA	NA	NA	32.9	4.5	54	30.166666666666668	3.886935287	2017-08-08	14:19:00	0	Unknown	https://storage.googleapis.com/elegansvariation.org/photos/hawaii2017/C-0456.thumb.jpg	Leaf litter
NA	NA	C-0456	S-05301	Yes	Proliferating (25+)	21.901075	-159.601247	Kauai	Wild forest	Full	no	NA	NA	NA	32.9	4.5	54	30.166666666666668	3.886935287	2017-08-08	14:19:00	NA	NA	https://storage.googleapis.com/elegansvariation.org/photos/hawaii2017/C-0456.thumb.jpg	Leaf litter
NA	NA	C-0456	S-05302	Yes	Proliferating (25+)	21.901075	-159.601247	Kauai	Wild forest	Full	no	NA	NA	NA	32.9	4.5	54	30.166666666666668	3.886935287	2017-08-08	14:19:00	0	Unknown	https://storage.googleapis.com/elegansvariation.org/photos/hawaii2017/C-0456.thumb.jpg	Leaf litter
NA	NA	C-0456	S-05309	Yes	Proliferating (25+)	21.901075	-159.601247	Kauai	Wild forest	Full	no	NA	NA	NA	32.9	4.5	54	30.166666666666668	3.886935287	2017-08-08	14:19:00	NA	NA	https://storage.googleapis.com/elegansvariation.org/photos/hawaii2017/C-0456.thumb.jpg	Leaf litter
NA	NA	C-0457	NA	No	NA	22.029775	-159.674942	Kauai	Wild forest	Full	no	NA	NA	NA	34.2	NA	56.4	28.11111111111111	657.52	2017-08-08	13:45:00	NA	NA	https://storage.googleapis.com/elegansvariation.org/photos/hawaii2017/C-0457.thumb.jpg	Fruit
NA	NA	C-0458	NA	No	NA	22.118808	-159.659317	Kauai	Wild forest	Full	no	NA	NA	NA	24.6	NA	56.6	25.388888888888893	1137.19403	2017-08-08	12:50:00	NA	NA	https://storage.googleapis.com/elegansvariation.org/photos/hawaii2017/C-0458.thumb.jpg	Vegetation
NA	NA	C-0459	S-05283	Yes	Very Few (1-3)	22.120758	-159.658203	Kauai	Wild forest	Partially Obstructed	no	NA	NA	NA	20.4	60	63.6	24.000000000000004	1129.831325	2017-08-08	12:45:00	0	Unknown	https://storage.googleapis.com/elegansvariation.org/photos/hawaii2017/C-0459.thumb.jpg	Leaf litter
NA	NA	C-0459	S-05297	Yes	Very Few (1-3)	22.120758	-159.658203	Kauai	Wild forest	Partially Obstructed	no	NA	NA	NA	20.4	60	63.6	24.000000000000004	1129.831325	2017-08-08	12:45:00	0	Unknown	https://storage.googleapis.com/elegansvariation.org/photos/hawaii2017/C-0459.thumb.jpg	Leaf litter
NA	NA	C-0460	S-05515	Yes	Very Few (1-3)	22.121408	-159.658	Kauai	Wild forest	Obstructed	no	NA	NA	NA	18.1	53	62.9	23.333333333333336	1144.56701	2017-08-08	12:42:00	0	Unknown	https://storage.googleapis.com/elegansvariation.org/photos/hawaii2017/C-0460.thumb.jpg	Leaf litter
NA	NA	C-0461	NA	No	NA	22.122519	-159.657619	Kauai	Wild forest	Obstructed	no	NA	NA	NA	21.3	NA	57.9	25.388888888888893	1156.35277	2017-08-08	12:37:00	NA	NA	https://storage.googleapis.com/elegansvariation.org/photos/hawaii2017/C-0461.thumb.jpg	Vegetation
NA	NA	C-0462	NA	No	NA	22.122633	-159.656808	Kauai	Wild forest	Obstructed	no	NA	NA	NA	17.1	58.5	62.6	23.333333333333336	1154.108911	2017-08-08	12:34:00	NA	NA	https://storage.googleapis.com/elegansvariation.org/photos/hawaii2017/C-0462.thumb.jpg	Leaf litter
NA	NA	C-0463	S-05415	Yes	Some (11-25)	22.122678	-159.656831	Kauai	Wild forest	Obstructed	no	NA	NA	NA	17.7	65.5	61.3	24.000000000000004	1152.042254	2017-08-08	12:32:00	NA	NA	https://storage.googleapis.com/elegansvariation.org/photos/hawaii2017/C-0463.thumb.jpg	Leaf litter
NA	NA	C-0463	S-05416	Yes	Some (11-25)	22.122678	-159.656831	Kauai	Wild forest	Obstructed	no	NA	NA	NA	17.7	65.5	61.3	24.000000000000004	1152.042254	2017-08-08	12:32:00	0	Unknown	https://storage.googleapis.com/elegansvariation.org/photos/hawaii2017/C-0463.thumb.jpg	Leaf litter
NA	NA	C-0463	S-05447	Yes	Some (11-25)	22.122678	-159.656831	Kauai	Wild forest	Obstructed	no	NA	NA	NA	17.7	65.5	61.3	24.000000000000004	1152.042254	2017-08-08	12:32:00	0	Unknown	https://storage.googleapis.com/elegansvariation.org/photos/hawaii2017/C-0463.thumb.jpg	Leaf litter
NA	NA	C-0463	S-05453	Yes	Some (11-25)	22.122678	-159.656831	Kauai	Wild forest	Obstructed	no	NA	NA	NA	17.7	65.5	61.3	24.000000000000004	1152.042254	2017-08-08	12:32:00	0	Unknown	https://storage.googleapis.com/elegansvariation.org/photos/hawaii2017/C-0463.thumb.jpg	Leaf litter
NA	NA	C-0463	S-05459	Yes	Some (11-25)	22.122678	-159.656831	Kauai	Wild forest	Obstructed	no	NA	NA	NA	17.7	65.5	61.3	24.000000000000004	1152.042254	2017-08-08	12:32:00	NA	NA	https://storage.googleapis.com/elegansvariation.org/photos/hawaii2017/C-0463.thumb.jpg	Leaf litter
NA	NA	C-0463	S-05460	Yes	Some (11-25)	22.122678	-159.656831	Kauai	Wild forest	Obstructed	no	NA	NA	NA	17.7	65.5	61.3	24.000000000000004	1152.042254	2017-08-08	12:32:00	NA	NA	https://storage.googleapis.com/elegansvariation.org/photos/hawaii2017/C-0463.thumb.jpg	Leaf litter
NA	NA	C-0464	NA	No	NA	22.123478	-159.656364	Kauai	Wild forest	Full	no	NA	NA	NA	26.7	NA	58.1	24.66666666666667	1152.465517	2017-08-08	12:28:00	NA	NA	https://storage.googleapis.com/elegansvariation.org/photos/hawaii2017/C-0464.thumb.jpg	Fruit
NA	NA	C-0465	NA	Tracks	NA	22.123408	-159.656158	Kauai	Wild forest	Partially Obstructed	no	NA	NA	NA	17.3	57.5	56	24.66666666666667	1152.543689	2017-08-08	12:27:00	NA	NA	https://storage.googleapis.com/elegansvariation.org/photos/hawaii2017/C-0465.thumb.jpg	Leaf litter
NA	NA	C-0466	S-05477	Yes	Some (11-25)	22.124342	-159.653486	Kauai	Wild forest	Partially Obstructed	no	NA	NA	NA	17.7	51	54.7	25.388888888888893	1126.995833	2017-08-08	12:18:00	NA	NA	https://storage.googleapis.com/elegansvariation.org/photos/hawaii2017/C-0466.thumb.jpg	Leaf litter
NA	NA	C-0466	S-05479	Yes	Some (11-25)	22.124342	-159.653486	Kauai	Wild forest	Partially Obstructed	no	NA	NA	NA	17.7	51	54.7	25.388888888888893	1126.995833	2017-08-08	12:18:00	0	Unknown	https://storage.googleapis.com/elegansvariation.org/photos/hawaii2017/C-0466.thumb.jpg	Leaf litter
NA	NA	C-0467	S-05500	Yes	Very Few (1-3)	22.124731	-159.651647	Kauai	Wild forest	Partially Obstructed	no	NA	NA	NA	20	57	58.1	28.77777777777778	1102.547619	2017-08-08	12:10:00	0	Unknown	https://storage.googleapis.com/elegansvariation.org/photos/hawaii2017/C-0467.thumb.jpg	Vegetation
NA	NA	C-0468	NA	No	NA	22.074258	-159.414397	Kauai	Wild forest	Partially Obstructed	no	NA	NA	NA	23.2	46.5	91.3	24.7	205.3261649	2017-08-09	08:36:00	NA	NA	https://storage.googleapis.com/elegansvariation.org/photos/hawaii2017/C-0468.thumb.jpg	Flower
NA	NA	C-0469	S-05381	Yes	Proliferating (25+)	22.12395	-159.655858	Kauai	Wild forest	Partially Obstructed	no	NA	NA	NA	17.9	64	54	24.66666666666667	1151.430108	2017-08-08	12:24:00	NA	NA	https://storage.googleapis.com/elegansvariation.org/photos/hawaii2017/C-0469.thumb.jpg	Leaf litter
NA	NA	C-0469	S-05387	Yes	Proliferating (25+)	22.12395	-159.655858	Kauai	Wild forest	Partially Obstructed	no	NA	NA	NA	17.9	64	54	24.66666666666667	1151.430108	2017-08-08	12:24:00	NA	NA	https://storage.googleapis.com/elegansvariation.org/photos/hawaii2017/C-0469.thumb.jpg	Leaf litter
NA	NA	C-0469	S-05388	Yes	Proliferating (25+)	22.12395	-159.655858	Kauai	Wild forest	Partially Obstructed	no	NA	NA	NA	17.9	64	54	24.66666666666667	1151.430108	2017-08-08	12:24:00	0	Unknown	https://storage.googleapis.com/elegansvariation.org/photos/hawaii2017/C-0469.thumb.jpg	Leaf litter
NA	NA	C-0469	S-05429	Yes	Proliferating (25+)	22.12395	-159.655858	Kauai	Wild forest	Partially Obstructed	no	NA	NA	NA	17.9	64	54	24.66666666666667	1151.430108	2017-08-08	12:24:00	0	Unknown	https://storage.googleapis.com/elegansvariation.org/photos/hawaii2017/C-0469.thumb.jpg	Leaf litter
NA	NA	C-0469	S-05430	Yes	Proliferating (25+)	22.12395	-159.655858	Kauai	Wild forest	Partially Obstructed	no	NA	NA	NA	17.9	64	54	24.66666666666667	1151.430108	2017-08-08	12:24:00	0	Unknown	https://storage.googleapis.com/elegansvariation.org/photos/hawaii2017/C-0469.thumb.jpg	Leaf litter
NA	NA	C-0469	S-05449	Yes	Proliferating (25+)	22.12395	-159.655858	Kauai	Wild forest	Partially Obstructed	no	NA	NA	NA	17.9	64	54	24.66666666666667	1151.430108	2017-08-08	12:24:00	0	Unknown	https://storage.googleapis.com/elegansvariation.org/photos/hawaii2017/C-0469.thumb.jpg	Leaf litter
NA	NA	C-0469	S-05450	Yes	Proliferating (25+)	22.12395	-159.655858	Kauai	Wild forest	Partially Obstructed	no	NA	NA	NA	17.9	64	54	24.66666666666667	1151.430108	2017-08-08	12:24:00	0	Unknown	https://storage.googleapis.com/elegansvariation.org/photos/hawaii2017/C-0469.thumb.jpg	Leaf litter
NA	NA	C-0470	NA	Tracks	NA	22.124456	-159.655375	Kauai	Wild forest	Obstructed	no	NA	NA	NA	16.1	54	58	23.333333333333336	1144.671429	2017-08-08	12:21:00	NA	NA	https://storage.googleapis.com/elegansvariation.org/photos/hawaii2017/C-0470.thumb.jpg	Leaf litter
NA	NA	C-0471	S-05246	Yes	Few (4-10)	22.149294	-159.6237	Kauai	Wild forest	Partially Obstructed	no	NA	NA	NA	16.8	39	67.2	21.9	1237.735849	2017-08-07	09:21:00	NA	NA	https://storage.googleapis.com/elegansvariation.org/photos/hawaii2017/C-0471.thumb.jpg	Leaf litter
NA	NA	C-0471	S-05250	Yes	Few (4-10)	22.149294	-159.6237	Kauai	Wild forest	Partially Obstructed	no	NA	NA	NA	16.8	39	67.2	21.9	1237.735849	2017-08-07	09:21:00	NA	NA	https://storage.googleapis.com/elegansvariation.org/photos/hawaii2017/C-0471.thumb.jpg	Leaf litter
NA	NA	C-0472	NA	No	NA	22.153172	-159.619833	Kauai	Wild forest	Obstructed	no	NA	NA	NA	19.6	10	72.1	21.2	1265.902439	2017-08-07	09:48:00	NA	NA	https://storage.googleapis.com/elegansvariation.org/photos/hawaii2017/C-0472.thumb.jpg	Leaf litter
NA	NA	C-0473	NA	No	NA	22.148703	-159.625544	Kauai	Wild forest	Partially Obstructed	no	NA	NA	NA	19.6	51.5	68.7	20.5	1214.580247	2017-08-07	09:21:00	NA	NA	https://storage.googleapis.com/elegansvariation.org/photos/hawaii2017/C-0473.thumb.jpg	Flower
NA	NA	C-0474	NA	No	NA	22.153892	-159.619153	Kauai	Wild forest	Obstructed	no	NA	NA	NA	20.5	39	73.5	20.5	1260.302083	2017-08-07	09:54:00	NA	NA	https://storage.googleapis.com/elegansvariation.org/photos/hawaii2017/C-0474.thumb.jpg	Leaf litter
NA	NA	C-0475	NA	Tracks	NA	22.152792	-159.616936	Kauai	Wild forest	Partially Obstructed	no	NA	NA	NA	18.5	37	64.9	22.6	1241.373333	2017-08-07	10:39:00	NA	NA	https://storage.googleapis.com/elegansvariation.org/photos/hawaii2017/C-0475.thumb.jpg	Leaf litter
NA	NA	C-0476	S-05241	Yes	Very Few (1-3)	22.148772	-159.615914	Kauai	Wild forest	Partially Obstructed	no	NA	NA	NA	21	47.5	70.6	23.3	1220.720339	2017-08-07	10:57:00	NA	NA	https://storage.googleapis.com/elegansvariation.org/photos/hawaii2017/C-0476.thumb.jpg	Leaf litter
NA	NA	C-0477	NA	No	NA	22.150281	-159.614978	Kauai	Wild forest	Obstructed	no	NA	NA	NA	18.9	40	65	24	1219.358974	2017-08-07	10:47:00	NA	NA	https://storage.googleapis.com/elegansvariation.org/photos/hawaii2017/C-0477.thumb.jpg	Leaf litter
NA	NA	C-0478	NA	No	NA	22.148244	-159.626564	Kauai	Wild forest	Partially Obstructed	no	NA	NA	NA	16.9	60	76.9	18.8	1217.34375	2017-08-07	09:15:00	NA	NA	https://storage.googleapis.com/elegansvariation.org/photos/hawaii2017/C-0478.thumb.jpg	Leaf litter
NA	NA	C-0479	S-05307	Yes	Very Few (1-3)	22.12186636	-159.664317	Kauai	Wild forest	Partially Obstructed	no	NA	NA	NA	17.8	21.5	74.2	19.9	1121	2017-08-07	08:32:00	0	Unknown	https://storage.googleapis.com/elegansvariation.org/photos/hawaii2017/C-0479.thumb.jpg	Leaf litter
NA	NA	C-0479	S-05308	Yes	Very Few (1-3)	22.12186636	-159.664317	Kauai	Wild forest	Partially Obstructed	no	NA	NA	NA	17.8	21.5	74.2	19.9	1121	2017-08-07	08:32:00	0	Unknown	https://storage.googleapis.com/elegansvariation.org/photos/hawaii2017/C-0479.thumb.jpg	Leaf litter
NA	NA	C-0480	NA	No	NA	22.121828	-159.664469	Kauai	Wild forest	Partially Obstructed	yes	4	F	1	16.3	46.5	79.4	18.5	1141.628571	2017-08-07	08:29:00	NA	NA	https://storage.googleapis.com/elegansvariation.org/photos/hawaii2017/C-0480.thumb.jpg	Leaf litter
NA	NA	C-0481	NA	No	NA	22.14763	-159.640166	Kauai	Wild forest	Partially Obstructed	no	NA	NA	NA	19.6	36	66.2	24	1258	2017-08-08	10:26:00	NA	NA	https://storage.googleapis.com/elegansvariation.org/photos/hawaii2017/C-0481.thumb.jpg	Leaf litter
NA	NA	C-0482	NA	No	NA	22.1469084	-159.6399113	Kauai	Wild forest	Obstructed	no	NA	NA	NA	17.6	39	64.2	23.3	1259	2017-08-08	10:34:00	NA	NA	https://storage.googleapis.com/elegansvariation.org/photos/hawaii2017/C-0482.thumb.jpg	Invertebrate
NA	NA	C-0483	NA	No	NA	22.149137	-159.641373	Kauai	Wild forest	Partially Obstructed	yes	5	F	2	17.5	27	69.6	20.5	1254	2017-08-08	10:11:00	NA	NA	https://storage.googleapis.com/elegansvariation.org/photos/hawaii2017/C-0483.thumb.jpg	Leaf litter
NA	NA	C-0484	NA	No	NA	22.149103	-159.641378	Kauai	Wild forest	Partially Obstructed	yes	5	F	1	17.1	36	71.1	20.5	1254	2017-08-08	10:10:00	NA	NA	https://storage.googleapis.com/elegansvariation.org/photos/hawaii2017/C-0484.thumb.jpg	Leaf litter
NA	NA	C-0485	NA	Tracks	NA	22.149054	-159.64138	Kauai	Wild forest	Partially Obstructed	yes	5	C	1	17.2	28	69.1	20.5	1254	2017-08-08	10:03:00	NA	NA	https://storage.googleapis.com/elegansvariation.org/photos/hawaii2017/C-0485.thumb.jpg	Leaf litter
NA	NA	C-0486	NA	Tracks	NA	22.149121	-159.641363	Kauai	Wild forest	Partially Obstructed	yes	5	C	2	17.1	34	69.1	20.5	1254	2017-08-08	10:02:00	NA	NA	https://storage.googleapis.com/elegansvariation.org/photos/hawaii2017/C-0486.thumb.jpg	Leaf litter
NA	NA	C-0487	NA	Tracks	NA	22.149134	-159.641396	Kauai	Wild forest	Partially Obstructed	yes	5	B	2	17.9	35	70.2	20.5	1254	2017-08-08	09:59:00	NA	NA	https://storage.googleapis.com/elegansvariation.org/photos/hawaii2017/C-0487.thumb.jpg	Leaf litter
NA	NA	C-0488	S-05487	Yes	Very Few (1-3)	22.149134	-159.641355	Kauai	Wild forest	Partially Obstructed	yes	5	A	1	17.9	34	68.4	21.2	1254	2017-08-08	09:56:00	NA	NA	https://storage.googleapis.com/elegansvariation.org/photos/hawaii2017/C-0488.thumb.jpg	Leaf litter
NA	NA	C-0489	S-05498	Yes	Very Few (1-3)	22.1491113	-159.6413417	Kauai	Wild forest	Partially Obstructed	yes	5	B	1	17.5	36	70.5	20.5	1254	2017-08-08	10:00:00	NA	NA	https://storage.googleapis.com/elegansvariation.org/photos/hawaii2017/C-0489.thumb.jpg	Leaf litter
NA	NA	C-0490	NA	Tracks	NA	22.149101	-159.641364	Kauai	Wild forest	Partially Obstructed	yes	5	E	2	17.1	27	72.6	21.2	1254	2017-08-08	10:08:00	NA	NA	https://storage.googleapis.com/elegansvariation.org/photos/hawaii2017/C-0490.thumb.jpg	Leaf litter
NA	NA	C-0491	S-05490	Yes	Very Few (1-3)	22.149098	-159.641366	Kauai	Wild forest	Partially Obstructed	yes	5	E	1	17.7	13	72.1	21.2	1254	2017-08-08	10:07:00	NA	NA	https://storage.googleapis.com/elegansvariation.org/photos/hawaii2017/C-0491.thumb.jpg	Leaf litter
NA	NA	C-0492	NA	Tracks	NA	22.149104	-159.641349	Kauai	Wild forest	Partially Obstructed	yes	5	D	2	17.3	35	73.5	20.7	1254	2017-08-08	10:06:00	NA	NA	https://storage.googleapis.com/elegansvariation.org/photos/hawaii2017/C-0492.thumb.jpg	Leaf litter
NA	NA	C-0493	S-05506	Yes	Very Few (1-3)	22.1490685	-159.64133	Kauai	Wild forest	Partially Obstructed	yes	5	D	1	17.4	15	73.5	20.5	1254	2017-08-08	10:05:00	NA	NA	https://storage.googleapis.com/elegansvariation.org/photos/hawaii2017/C-0493.thumb.jpg	Leaf litter
NA	NA	C-0494	NA	No	NA	22.149134	-159.641347	Kauai	Wild forest	Partially Obstructed	yes	5	A	2	17.5	35	70	21.2	1254	2017-08-08	09:54:00	NA	NA	https://storage.googleapis.com/elegansvariation.org/photos/hawaii2017/C-0494.thumb.jpg	Leaf litter
NA	NA	C-0495	S-05503	Yes	Very Few (1-3)	22.151208	-159.646283	Kauai	Wild forest	Partially Obstructed	no	NA	NA	NA	18.6	13	74.5	20.5	1245.018519	2017-08-08	09:39:00	NA	NA	https://storage.googleapis.com/elegansvariation.org/photos/hawaii2017/C-0495.thumb.jpg	Leaf litter
NA	NA	C-0496	NA	No	NA	22.147381	-159.608839	Kauai	Wild forest	Partially Obstructed	no	NA	NA	NA	19.5	57	63.6	25.6	1227.027972	2017-08-07	11:57:00	NA	NA	https://storage.googleapis.com/elegansvariation.org/photos/hawaii2017/C-0496.thumb.jpg	Leaf litter
NA	NA	C-0497	NA	No	NA	22.146757	-159.61267	Kauai	Wild forest	Partially Obstructed	no	NA	NA	NA	18.5	47	56.4	25.6	1139	2017-08-07	11:35:00	NA	NA	https://storage.googleapis.com/elegansvariation.org/photos/hawaii2017/C-0497.thumb.jpg	Leaf litter
NA	NA	C-0498	NA	No	NA	22.147214	-159.617546	Kauai	Wild forest	Partially Obstructed	no	NA	NA	NA	18.9	48	63.3	23.3	1206	2017-08-07	11:08:00	NA	NA	https://storage.googleapis.com/elegansvariation.org/photos/hawaii2017/C-0498.thumb.jpg	Leaf litter
NA	NA	C-0499	NA	No	NA	22.1491967	-159.6155513	Kauai	Wild forest	Partially Obstructed	no	NA	NA	NA	29.2	40.5	73.3	22.2	1210	2017-08-07	10:55:00	NA	NA	https://storage.googleapis.com/elegansvariation.org/photos/hawaii2017/C-0499.thumb.jpg	Fruit
NA	NA	C-0500	NA	No	NA	22.152361	-159.616875	Kauai	Wild forest	Partially Obstructed	no	NA	NA	NA	18	NA	63.9	22.2	1232	2017-08-07	10:32:00	NA	NA	https://storage.googleapis.com/elegansvariation.org/photos/hawaii2017/C-0500.thumb.jpg	Leaf litter
NA	NA	C-0501	NA	Tracks	NA	22.153389	-159.617265	Kauai	Wild forest	Partially Obstructed	no	NA	NA	NA	18.6	43.5	68.7	21.5	1250	2017-08-07	10:29:00	NA	NA	https://storage.googleapis.com/elegansvariation.org/photos/hawaii2017/C-0501.thumb.jpg	Leaf litter
NA	NA	C-0502	S-05337	Yes	Very Few (1-3)	22.1517887	-159.6209707	Kauai	Wild forest	Partially Obstructed	no	NA	NA	NA	18.2	49	67.3	20.8	1245	2017-08-07	09:42:00	0	Unknown	https://storage.googleapis.com/elegansvariation.org/photos/hawaii2017/C-0502.thumb.jpg	Vegetation
NA	NA	C-0502	S-05338	Yes	Very Few (1-3)	22.1517887	-159.6209707	Kauai	Wild forest	Partially Obstructed	no	NA	NA	NA	18.2	49	67.3	20.8	1245	2017-08-07	09:42:00	0	Unknown	https://storage.googleapis.com/elegansvariation.org/photos/hawaii2017/C-0502.thumb.jpg	Vegetation
NA	NA	C-0503	NA	No	NA	22.148761	-159.625561	Kauai	Wild forest	Partially Obstructed	no	NA	NA	NA	16.6	42	76.6	18.8	1220.143192	2017-08-07	09:15:00	NA	NA	https://storage.googleapis.com/elegansvariation.org/photos/hawaii2017/C-0503.thumb.jpg	Leaf litter
NA	NA	C-0504	NA	No	NA	22.148308	-159.627723	Kauai	Wild forest	Full	no	NA	NA	NA	18	26	72.2	20.1	1221	2017-08-07	09:07:00	NA	NA	https://storage.googleapis.com/elegansvariation.org/photos/hawaii2017/C-0504.thumb.jpg	Leaf litter
NA	NA	C-0505	NA	No	NA	22.14832755	-159.6279999	Kauai	Wild forest	Partially Obstructed	no	NA	NA	NA	18.2	21	71.2	20.8	1228	2017-08-07	09:04:00	NA	NA	https://storage.googleapis.com/elegansvariation.org/photos/hawaii2017/C-0505.thumb.jpg	Leaf litter
NA	NA	C-0506	NA	No	NA	22.147506	-159.606147	Kauai	Wild forest	Partially Obstructed	no	NA	NA	NA	19.3	46	64.1	24	1244.941176	2017-08-07	12:05:00	NA	NA	https://storage.googleapis.com/elegansvariation.org/photos/hawaii2017/C-0506.thumb.jpg	Leaf litter
NA	NA	C-0507	NA	No	NA	22.147303	-159.608131	Kauai	Wild grassland	Full	no	NA	NA	NA	30.6	37	59.3	24.7	1247.242105	2017-08-07	12:20:00	NA	NA	https://storage.googleapis.com/elegansvariation.org/photos/hawaii2017/C-0507.thumb.jpg	Leaf litter
NA	NA	C-0508	NA	No	NA	22.153181	-159.598953	Kauai	Wild forest	Partially Obstructed	no	NA	NA	NA	26	49	68.4	23.3	1245.331126	2017-08-07	12:32:00	NA	NA	https://storage.googleapis.com/elegansvariation.org/photos/hawaii2017/C-0508.thumb.jpg	Leaf litter
NA	NA	C-0509	NA	Tracks	NA	22.152025	-159.600203	Kauai	Wild forest	Partially Obstructed	no	NA	NA	NA	21	49	71.2	22.2	1241.303571	2017-08-07	12:25:00	NA	NA	https://storage.googleapis.com/elegansvariation.org/photos/hawaii2017/C-0509.thumb.jpg	Leaf litter
NA	NA	C-0510	NA	No	NA	22.115511	-159.67	Kauai	Wild forest	Obstructed	no	NA	NA	NA	21	NA	65.7	24	1131.986667	2017-08-07	16:58:00	NA	NA	https://storage.googleapis.com/elegansvariation.org/photos/hawaii2017/C-0510.thumb.jpg	Fruit
NA	NA	C-0511	NA	No	NA	22.144058	-159.648064	Kauai	Wild forest	Obstructed	no	NA	NA	NA	18.4	55	63.3	23.3	1253.287234	2017-08-07	16:26:00	NA	NA	https://storage.googleapis.com/elegansvariation.org/photos/hawaii2017/C-0511.thumb.jpg	Fruit
NA	NA	C-0512	S-05293	Yes	Very Few (1-3)	22.130244	-159.657581	Kauai	Wild forest	Obstructed	no	NA	NA	NA	19.3	42.3	55.3	24	1107.352518	2017-08-07	16:50:00	0	Unknown	https://storage.googleapis.com/elegansvariation.org/photos/hawaii2017/C-0512.thumb.jpg	Leaf litter
NA	NA	C-0513	S-05247	Yes	Very Few (1-3)	22.101269	-159.677783	Kauai	Wild forest	Partially Obstructed	no	NA	NA	NA	24	22	72	24	1017.633136	2017-08-07	17:20:00	0	Unknown	https://storage.googleapis.com/elegansvariation.org/photos/hawaii2017/C-0513.thumb.jpg	Leaf litter
NA	NA	C-0513	S-05248	Yes	Very Few (1-3)	22.101269	-159.677783	Kauai	Wild forest	Partially Obstructed	no	NA	NA	NA	24	22	72	24	1017.633136	2017-08-07	17:20:00	0	Unknown	https://storage.googleapis.com/elegansvariation.org/photos/hawaii2017/C-0513.thumb.jpg	Leaf litter
NA	NA	C-0514	NA	No	NA	22.140817	-159.649133	Kauai	Wild forest	Partially Obstructed	no	NA	NA	NA	18.6	56.5	59.4	24.7	1250.600496	2017-08-07	16:30:00	NA	NA	https://storage.googleapis.com/elegansvariation.org/photos/hawaii2017/C-0514.thumb.jpg	Leaf litter
NA	NA	C-0515	NA	No	NA	22.115422	-159.669867	Kauai	Wild grassland	Obstructed	no	NA	NA	NA	24	18	66.2	24.7	1127.09	2017-08-07	17:01:00	NA	NA	https://storage.googleapis.com/elegansvariation.org/photos/hawaii2017/C-0515.thumb.jpg	Leaf litter
NA	NA	C-0517	NA	No	NA	22.132608	-159.660397	Kauai	Wild forest	Partially Obstructed	no	NA	NA	NA	17.6	NA	83.4	18.1	1124.532609	2017-08-08	09:14:00	NA	NA	https://storage.googleapis.com/elegansvariation.org/photos/hawaii2017/C-0517.thumb.jpg	Leaf litter
NA	NA	C-0518	NA	No	NA	22.132272	-159.660186	Kauai	Wild forest	Partially Obstructed	no	NA	NA	NA	17.8	38	80.5	18.8	1142.729592	2017-08-08	09:10:00	NA	NA	https://storage.googleapis.com/elegansvariation.org/photos/hawaii2017/C-0518.thumb.jpg	Leaf litter
NA	NA	C-0519	NA	No	NA	22.131492	-159.660439	Kauai	Wild forest	Partially Obstructed	yes	6	D	3	17.1	46	76	19.7	1154.578571	2017-08-08	08:59:00	NA	NA	https://storage.googleapis.com/elegansvariation.org/photos/hawaii2017/C-0519.thumb.jpg	Leaf litter
NA	NA	C-0520	S-05255	Yes	Very Few (1-3)	22.131492	-159.660439	Kauai	Wild forest	Partially Obstructed	yes	6	C	3	17	29.5	71.1	19.5	1153.620253	2017-08-08	09:00:00	0	Unknown	https://storage.googleapis.com/elegansvariation.org/photos/hawaii2017/C-0520.thumb.jpg	Leaf litter
NA	NA	C-0521	NA	No	NA	22.148258	-159.6272109	Kauai	Wild forest	Partially Obstructed	no	NA	NA	NA	16.8	38	67.2	21.2	1221	2017-08-07	09:10:00	NA	NA	https://storage.googleapis.com/elegansvariation.org/photos/hawaii2017/C-0521.thumb.jpg	Leaf litter
NA	NA	C-0522	NA	Tracks	NA	22.131483	-159.660422	Kauai	Wild forest	Partially Obstructed	yes	6	E	1	17.2	43.5	76	19.7	1150.415842	2017-08-08	08:58:00	NA	NA	https://storage.googleapis.com/elegansvariation.org/photos/hawaii2017/C-0522.thumb.jpg	Leaf litter
NA	NA	C-0523	S-05363	Yes	Very Few (1-3)	22.131497	-159.660464	Kauai	Wild forest	Partially Obstructed	yes	6	F	2	17.7	51.5	76	19.7	1157.310811	2017-08-08	08:57:00	0	Unknown	https://storage.googleapis.com/elegansvariation.org/photos/hawaii2017/C-0523.thumb.jpg	Leaf litter
NA	NA	C-0523	S-05364	Yes	Very Few (1-3)	22.131497	-159.660464	Kauai	Wild forest	Partially Obstructed	yes	6	F	2	17.7	51.5	76	19.7	1157.310811	2017-08-08	08:57:00	0	Unknown	https://storage.googleapis.com/elegansvariation.org/photos/hawaii2017/C-0523.thumb.jpg	Leaf litter
NA	NA	C-0524	S-05401	Yes	Some (11-25)	22.132931	-159.660475	Kauai	Wild forest	Partially Obstructed	no	NA	NA	NA	16.8	54.5	83.8	18.8	1117.22449	2017-08-08	09:16:00	NA	NA	https://storage.googleapis.com/elegansvariation.org/photos/hawaii2017/C-0524.thumb.jpg	Leaf litter
NA	NA	C-0524	S-05406	Yes	Some (11-25)	22.132931	-159.660475	Kauai	Wild forest	Partially Obstructed	no	NA	NA	NA	16.8	54.5	83.8	18.8	1117.22449	2017-08-08	09:16:00	NA	NA	https://storage.googleapis.com/elegansvariation.org/photos/hawaii2017/C-0524.thumb.jpg	Leaf litter
NA	NA	C-0524	S-05407	Yes	Some (11-25)	22.132931	-159.660475	Kauai	Wild forest	Partially Obstructed	no	NA	NA	NA	16.8	54.5	83.8	18.8	1117.22449	2017-08-08	09:16:00	0	Unknown	https://storage.googleapis.com/elegansvariation.org/photos/hawaii2017/C-0524.thumb.jpg	Leaf litter
NA	NA	C-0524	S-05413	Yes	Some (11-25)	22.132931	-159.660475	Kauai	Wild forest	Partially Obstructed	no	NA	NA	NA	16.8	54.5	83.8	18.8	1117.22449	2017-08-08	09:16:00	0	Unknown	https://storage.googleapis.com/elegansvariation.org/photos/hawaii2017/C-0524.thumb.jpg	Leaf litter
NA	NA	C-0524	S-05419	Yes	Some (11-25)	22.132931	-159.660475	Kauai	Wild forest	Partially Obstructed	no	NA	NA	NA	16.8	54.5	83.8	18.8	1117.22449	2017-08-08	09:16:00	NA	NA	https://storage.googleapis.com/elegansvariation.org/photos/hawaii2017/C-0524.thumb.jpg	Leaf litter
NA	NA	C-0524	S-05420	Yes	Some (11-25)	22.132931	-159.660475	Kauai	Wild forest	Partially Obstructed	no	NA	NA	NA	16.8	54.5	83.8	18.8	1117.22449	2017-08-08	09:16:00	0	Unknown	https://storage.googleapis.com/elegansvariation.org/photos/hawaii2017/C-0524.thumb.jpg	Leaf litter
NA	NA	C-0524	S-05457	Yes	Some (11-25)	22.132931	-159.660475	Kauai	Wild forest	Partially Obstructed	no	NA	NA	NA	16.8	54.5	83.8	18.8	1117.22449	2017-08-08	09:16:00	NA	NA	https://storage.googleapis.com/elegansvariation.org/photos/hawaii2017/C-0524.thumb.jpg	Leaf litter
NA	NA	C-0524	S-05458	Yes	Some (11-25)	22.132931	-159.660475	Kauai	Wild forest	Partially Obstructed	no	NA	NA	NA	16.8	54.5	83.8	18.8	1117.22449	2017-08-08	09:16:00	NA	NA	https://storage.googleapis.com/elegansvariation.org/photos/hawaii2017/C-0524.thumb.jpg	Leaf litter
NA	NA	C-0525	S-05441	Yes	Very Few (1-3)	22.131492	-159.660439	Kauai	Wild forest	Partially Obstructed	yes	6	C	2	17.4	50.5	76.6	18.8	1153.42623	2017-08-08	09:02:00	NA	NA	https://storage.googleapis.com/elegansvariation.org/photos/hawaii2017/C-0525.thumb.jpg	Leaf litter
NA	NA	C-0525	S-05448	Yes	Very Few (1-3)	22.131492	-159.660439	Kauai	Wild forest	Partially Obstructed	yes	6	C	2	17.4	50.5	76.6	18.8	1153.42623	2017-08-08	09:02:00	NA	NA	https://storage.googleapis.com/elegansvariation.org/photos/hawaii2017/C-0525.thumb.jpg	Leaf litter
NA	NA	C-0526	S-05478	Yes	Very Few (1-3)	22.1315	-159.660456	Kauai	Wild forest	Partially Obstructed	yes	6	B	1	17.5	45	76.6	19.5	1155.064286	2017-08-08	09:03:00	NA	NA	https://storage.googleapis.com/elegansvariation.org/photos/hawaii2017/C-0526.thumb.jpg	Leaf litter
NA	NA	C-0527	S-05357	Yes	Few (4-10)	22.14598114	-159.6116399	Kauai	Wild forest	Partially Obstructed	no	NA	NA	NA	NA	38.5	64.2	26	1161	2017-08-07	14:15:00	0	Unknown	https://storage.googleapis.com/elegansvariation.org/photos/hawaii2017/C-0527.thumb.jpg	Fruit
NA	NA	C-0527	S-05359	Yes	Few (4-10)	22.14598114	-159.6116399	Kauai	Wild forest	Partially Obstructed	no	NA	NA	NA	NA	38.5	64.2	26	1161	2017-08-07	14:15:00	0	Unknown	https://storage.googleapis.com/elegansvariation.org/photos/hawaii2017/C-0527.thumb.jpg	Fruit
NA	NA	C-0527	S-05360	Yes	Few (4-10)	22.14598114	-159.6116399	Kauai	Wild forest	Partially Obstructed	no	NA	NA	NA	NA	38.5	64.2	26	1161	2017-08-07	14:15:00	0	Unknown	https://storage.googleapis.com/elegansvariation.org/photos/hawaii2017/C-0527.thumb.jpg	Fruit
NA	NA	C-0530	NA	No	NA	22.147428	-159.608517	Kauai	Wild forest	Partially Obstructed	no	NA	NA	NA	20.2	47	61.3	26.3	1220.97449	2017-08-07	12:12:00	NA	NA	https://storage.googleapis.com/elegansvariation.org/photos/hawaii2017/C-0530.thumb.jpg	Leaf litter
NA	NA	C-0531	S-05389	Yes	Few (4-10)	22.117706	-159.660417	Kauai	Wild forest	Partially Obstructed	no	NA	NA	NA	20.1	27	53.1	24.3	1115.647619	2017-08-08	12:54:00	0	Unknown	https://storage.googleapis.com/elegansvariation.org/photos/hawaii2017/C-0531.thumb.jpg	Leaf litter
NA	NA	C-0531	S-05390	Yes	Few (4-10)	22.117706	-159.660417	Kauai	Wild forest	Partially Obstructed	no	NA	NA	NA	20.1	27	53.1	24.3	1115.647619	2017-08-08	12:54:00	0	Unknown	https://storage.googleapis.com/elegansvariation.org/photos/hawaii2017/C-0531.thumb.jpg	Leaf litter
NA	NA	C-0531	S-05399	Yes	Few (4-10)	22.117706	-159.660417	Kauai	Wild forest	Partially Obstructed	no	NA	NA	NA	20.1	27	53.1	24.3	1115.647619	2017-08-08	12:54:00	0	Unknown	https://storage.googleapis.com/elegansvariation.org/photos/hawaii2017/C-0531.thumb.jpg	Leaf litter
NA	NA	C-0532	NA	No	NA	21.900089	-159.561089	Kauai	Rural garden	Partially Obstructed	no	NA	NA	NA	30.7	NA	53.1	30.5	74.05904059	2017-08-08	15:02:00	NA	NA	https://storage.googleapis.com/elegansvariation.org/photos/hawaii2017/C-0532.thumb.jpg	Flower
NA	NA	C-0533	S-05584	Yes	Very Few (1-3)	22.092094	-159.431408	Kauai	Wild forest	Partially Obstructed	no	NA	NA	NA	23.6	NA	77.7	27.7	406.0703518	2017-08-09	09:56:00	0	Unknown	https://storage.googleapis.com/elegansvariation.org/photos/hawaii2017/C-0533.thumb.jpg	Leaf litter
NA	NA	C-0534	S-05444	Yes	Very Few (1-3)	22.131897	-159.660083	Kauai	Wild forest	Partially Obstructed	no	NA	NA	NA	17.8	72.5	71.5	24.88888888888889	1163.696833	2017-08-08	09:07:00	NA	NA	https://storage.googleapis.com/elegansvariation.org/photos/hawaii2017/C-0534.thumb.jpg	Leaf litter
NA	NA	C-0535	NA	No	NA	22.131989	-159.660036	Kauai	Wild forest	Partially Obstructed	no	NA	NA	NA	NA	NA	71.5	19.88888888888889	1161.782051	2017-08-08	09:09:00	NA	NA	https://storage.googleapis.com/elegansvariation.org/photos/hawaii2017/C-0535.thumb.jpg	Invertebrate
NA	NA	C-0536	S-05481	Yes	Few (4-10)	22.132928	-159.660564	Kauai	Wild forest	Obstructed	no	NA	NA	NA	16.7	NA	80.6	19.88888888888889	1130.072289	2017-08-08	09:19:00	NA	NA	https://storage.googleapis.com/elegansvariation.org/photos/hawaii2017/C-0536.thumb.jpg	Fruit
NA	NA	C-0536	S-05484	Yes	Few (4-10)	22.132928	-159.660564	Kauai	Wild forest	Obstructed	no	NA	NA	NA	16.7	NA	80.6	19.88888888888889	1130.072289	2017-08-08	09:19:00	NA	NA	https://storage.googleapis.com/elegansvariation.org/photos/hawaii2017/C-0536.thumb.jpg	Fruit
NA	NA	C-0536	S-05509	Yes	Few (4-10)	22.132928	-159.660564	Kauai	Wild forest	Obstructed	no	NA	NA	NA	16.7	NA	80.6	19.88888888888889	1130.072289	2017-08-08	09:19:00	NA	NA	https://storage.googleapis.com/elegansvariation.org/photos/hawaii2017/C-0536.thumb.jpg	Fruit
NA	NA	C-0537	S-05465	Yes	Few (4-10)	22.132692	-159.660447	Kauai	Wild forest	Obstructed	no	NA	NA	NA	16.7	68.5	83.8	19.166666666666668	1137.259124	2017-08-08	09:14:00	NA	NA	https://storage.googleapis.com/elegansvariation.org/photos/hawaii2017/C-0537.thumb.jpg	Leaf litter
NA	NA	C-0537	S-05466	Yes	Few (4-10)	22.132692	-159.660447	Kauai	Wild forest	Obstructed	no	NA	NA	NA	16.7	68.5	83.8	19.166666666666668	1137.259124	2017-08-08	09:14:00	0	Unknown	https://storage.googleapis.com/elegansvariation.org/photos/hawaii2017/C-0537.thumb.jpg	Leaf litter
NA	NA	C-0537	S-05467	Yes	Few (4-10)	22.132692	-159.660447	Kauai	Wild forest	Obstructed	no	NA	NA	NA	16.7	68.5	83.8	19.166666666666668	1137.259124	2017-08-08	09:14:00	NA	NA	https://storage.googleapis.com/elegansvariation.org/photos/hawaii2017/C-0537.thumb.jpg	Leaf litter
NA	NA	C-0538	S-05461	Yes	Very Few (1-3)	22.132747	-159.660425	Kauai	Wild forest	Obstructed	no	NA	NA	NA	16.7	62	81.3	19.88888888888889	1136.003125	2017-08-08	09:17:00	0	Unknown	https://storage.googleapis.com/elegansvariation.org/photos/hawaii2017/C-0538.thumb.jpg	Leaf litter
NA	NA	C-0538	S-05462	Yes	Very Few (1-3)	22.132747	-159.660425	Kauai	Wild forest	Obstructed	no	NA	NA	NA	16.7	62	81.3	19.88888888888889	1136.003125	2017-08-08	09:17:00	0	Unknown	https://storage.googleapis.com/elegansvariation.org/photos/hawaii2017/C-0538.thumb.jpg	Leaf litter
NA	NA	C-0538	S-05468	Yes	Very Few (1-3)	22.132747	-159.660425	Kauai	Wild forest	Obstructed	no	NA	NA	NA	16.7	62	81.3	19.88888888888889	1136.003125	2017-08-08	09:17:00	0	Unknown	https://storage.googleapis.com/elegansvariation.org/photos/hawaii2017/C-0538.thumb.jpg	Leaf litter
NA	NA	C-0539	NA	No	NA	22.132772	-159.660617	Kauai	Wild forest	Partially Obstructed	no	NA	NA	NA	18.5	NA	82.3	19.88888888888889	1132.959184	2017-08-08	09:23:00	NA	NA	https://storage.googleapis.com/elegansvariation.org/photos/hawaii2017/C-0539.thumb.jpg	Fruit
NA	NA	C-0540	NA	No	NA	22.132761	-159.660686	Kauai	Wild forest	Partially Obstructed	no	NA	NA	NA	18.1	NA	80.4	19.166666666666668	1133.65873	2017-08-08	09:23:00	NA	NA	https://storage.googleapis.com/elegansvariation.org/photos/hawaii2017/C-0540.thumb.jpg	Fruit
NA	NA	C-0541	NA	No	NA	22.137622	-159.642844	Kauai	Wild forest	Partially Obstructed	no	NA	NA	NA	25	33	58.4	24.7	1152.616822	2017-08-08	14:00:00	NA	NA	https://storage.googleapis.com/elegansvariation.org/photos/hawaii2017/C-0541.thumb.jpg	Fruit
NA	NA	C-0542	NA	No	NA	22.1457871	-159.6399011	Kauai	Wild forest	Obstructed	no	NA	NA	NA	18.8	58.5	63.6	22.6	1263	2017-08-08	10:45:00	NA	NA	https://storage.googleapis.com/elegansvariation.org/photos/hawaii2017/C-0542.thumb.jpg	Leaf litter
NA	NA	C-0543	NA	No	NA	22.137228	-159.643478	Kauai	Wild forest	Partially Obstructed	no	NA	NA	NA	24.7	59.5	58.5	24.7	1157.416244	2017-08-08	14:04:00	NA	NA	https://storage.googleapis.com/elegansvariation.org/photos/hawaii2017/C-0543.thumb.jpg	Fruit
NA	NA	C-0544	S-05378	Yes	Very Few (1-3)	22.13606677	-159.6444975	Kauai	Wild forest	Partially Obstructed	no	NA	NA	NA	19.4	28	61.8	24.7	1163	2017-08-08	14:13:00	NA	NA	https://storage.googleapis.com/elegansvariation.org/photos/hawaii2017/C-0544.thumb.jpg	Leaf litter
NA	NA	C-0545	S-05384	Yes	Few (4-10)	22.130694	-159.657808	Kauai	Wild forest	Partially Obstructed	no	NA	NA	NA	26.1	55.5	46.8	20.1	1129.118644	2017-08-08	15:00:00	0	Unknown	https://storage.googleapis.com/elegansvariation.org/photos/hawaii2017/C-0545.thumb.jpg	Leaf litter
NA	NA	C-0545	S-05483	Yes	Few (4-10)	22.130694	-159.657808	Kauai	Wild forest	Partially Obstructed	no	NA	NA	NA	26.1	55.5	46.8	20.1	1129.118644	2017-08-08	15:00:00	NA	NA	https://storage.googleapis.com/elegansvariation.org/photos/hawaii2017/C-0545.thumb.jpg	Leaf litter
NA	NA	C-0545	S-05501	Yes	Few (4-10)	22.130694	-159.657808	Kauai	Wild forest	Partially Obstructed	no	NA	NA	NA	26.1	55.5	46.8	20.1	1129.118644	2017-08-08	15:00:00	0	Unknown	https://storage.googleapis.com/elegansvariation.org/photos/hawaii2017/C-0545.thumb.jpg	Leaf litter
NA	NA	C-0545	S-05510	Yes	Few (4-10)	22.130694	-159.657808	Kauai	Wild forest	Partially Obstructed	no	NA	NA	NA	26.1	55.5	46.8	20.1	1129.118644	2017-08-08	15:00:00	NA	NA	https://storage.googleapis.com/elegansvariation.org/photos/hawaii2017/C-0545.thumb.jpg	Leaf litter
NA	NA	C-0546	S-05424	Yes	Few (4-10)	22.130731	-159.657831	Kauai	Wild forest	Partially Obstructed	no	NA	NA	NA	21.5	48	49.1	26.7	1130.472973	2017-08-08	15:03:00	NA	NA	https://storage.googleapis.com/elegansvariation.org/photos/hawaii2017/C-0546.thumb.jpg	Leaf litter
NA	NA	C-0546	S-05437	Yes	Few (4-10)	22.130731	-159.657831	Kauai	Wild forest	Partially Obstructed	no	NA	NA	NA	21.5	48	49.1	26.7	1130.472973	2017-08-08	15:03:00	0	Unknown	https://storage.googleapis.com/elegansvariation.org/photos/hawaii2017/C-0546.thumb.jpg	Leaf litter
NA	NA	C-0546	S-05438	Yes	Few (4-10)	22.130731	-159.657831	Kauai	Wild forest	Partially Obstructed	no	NA	NA	NA	21.5	48	49.1	26.7	1130.472973	2017-08-08	15:03:00	0	Unknown	https://storage.googleapis.com/elegansvariation.org/photos/hawaii2017/C-0546.thumb.jpg	Leaf litter
NA	NA	C-0546	S-05439	Yes	Few (4-10)	22.130731	-159.657831	Kauai	Wild forest	Partially Obstructed	no	NA	NA	NA	21.5	48	49.1	26.7	1130.472973	2017-08-08	15:03:00	NA	NA	https://storage.googleapis.com/elegansvariation.org/photos/hawaii2017/C-0546.thumb.jpg	Leaf litter
NA	NA	C-0547	NA	No	NA	22.130136	-159.657764	Kauai	Wild forest	Partially Obstructed	no	NA	NA	NA	26.2	34	60.3	26	1103.547009	2017-08-08	15:17:00	NA	NA	https://storage.googleapis.com/elegansvariation.org/photos/hawaii2017/C-0547.thumb.jpg	Flower
NA	NA	C-0548	NA	No	NA	22.12497307	-159.6632963	Kauai	Wild forest	Partially Obstructed	no	NA	NA	NA	21.4	45	64.2	26	1102	2017-08-08	15:21:00	NA	NA	https://storage.googleapis.com/elegansvariation.org/photos/hawaii2017/C-0548.thumb.jpg	Flower
NA	NA	C-0549	S-07513	Yes	Few (4-10)	22.05560838	-159.4056079	Kauai	Wild forest	Partially Obstructed	no	NA	NA	NA	23.9	48	91.6	24.7	207.65287835	2017-08-09	08:38:00	NA	NA	https://storage.googleapis.com/elegansvariation.org/photos/hawaii2017/C-0549.thumb.jpg	Fruit
NA	NA	C-0549	S-07515	Yes	Few (4-10)	22.05560838	-159.4056079	Kauai	Wild forest	Partially Obstructed	no	NA	NA	NA	23.9	48	91.6	24.7	207.65287835	2017-08-09	08:38:00	NA	NA	https://storage.googleapis.com/elegansvariation.org/photos/hawaii2017/C-0549.thumb.jpg	Fruit
NA	NA	C-0550	NA	No	NA	22.076328	-159.413867	Kauai	Wild forest	Partially Obstructed	no	NA	NA	NA	23.3	48	90	24.7	224.5057915	2017-08-09	08:48:00	NA	NA	https://storage.googleapis.com/elegansvariation.org/photos/hawaii2017/C-0550.thumb.jpg	Fruit
NA	NA	C-0551	S-05623	Yes	Very Few (1-3)	22.083419	-159.412447	Kauai	Wild forest	Partially Obstructed	no	NA	NA	NA	24.2	65	95.5	27.4	290.3887734	2017-08-09	09:24:00	NA	NA	https://storage.googleapis.com/elegansvariation.org/photos/hawaii2017/C-0551.thumb.jpg	Leaf litter
NA	NA	C-0552	NA	No	NA	22.081719	-159.412692	Kauai	Wild forest	Partially Obstructed	no	NA	NA	NA	23.2	67.5	95.5	27.4	261.4175258	2017-08-09	09:17:00	NA	NA	https://storage.googleapis.com/elegansvariation.org/photos/hawaii2017/C-0552.thumb.jpg	Flower
NA	NA	C-0553	NA	No	NA	22.075069	-159.413667	Kauai	Wild forest	Partially Obstructed	no	NA	NA	NA	24.9	65.5	76.5	28.1	197.5992218	2017-08-09	10:10:00	NA	NA	https://storage.googleapis.com/elegansvariation.org/photos/hawaii2017/C-0553.thumb.jpg	Fungus
NA	NA	C-0554	NA	No	NA	22.084658	-159.412764	Kauai	Wild forest	Partially Obstructed	no	NA	NA	NA	25	66	81.7	26	300.5458937	2017-08-09	09:30:00	NA	NA	https://storage.googleapis.com/elegansvariation.org/photos/hawaii2017/C-0554.thumb.jpg	Invertebrate
NA	NA	C-0555	S-05640	Yes	Very Few (1-3)	22.086411	-159.412764	Kauai	Wild forest	Partially Obstructed	no	NA	NA	NA	25.5	NA	70.2	28.1	290.6385542	2017-08-09	09:44:00	0	Unknown	https://storage.googleapis.com/elegansvariation.org/photos/hawaii2017/C-0555.thumb.jpg	Fungus
NA	NA	C-0556	NA	No	NA	22.084003	-159.412339	Kauai	Wild forest	Partially Obstructed	no	NA	NA	NA	25.3	62.5	77.8	27.4	295.068323	2017-08-09	09:27:00	NA	NA	https://storage.googleapis.com/elegansvariation.org/photos/hawaii2017/C-0556.thumb.jpg	Leaf litter
NA	NA	C-0557	NA	No	NA	22.07822276	-159.4126693	Kauai	Wild forest	Partially Obstructed	no	NA	NA	NA	23.5	41	95.5	27.4	258	2017-08-09	09:02:00	NA	NA	https://storage.googleapis.com/elegansvariation.org/photos/hawaii2017/C-0557.thumb.jpg	Invertebrate
NA	NA	C-0558	S-05518	Yes	Proliferating (25+)	22.077467	-159.413108	Kauai	Wild forest	Partially Obstructed	NA	NA	NA	NA	23.2	47.5	93.2	24.7	228.8045455	2017-08-09	08:54:00	0	Unknown	https://storage.googleapis.com/elegansvariation.org/photos/hawaii2017/C-0558.thumb.jpg	Leaf litter
NA	NA	C-0558	S-05519	Yes	Proliferating (25+)	22.077467	-159.413108	Kauai	Wild forest	Partially Obstructed	NA	NA	NA	NA	23.2	47.5	93.2	24.7	228.8045455	2017-08-09	08:54:00	0	Unknown	https://storage.googleapis.com/elegansvariation.org/photos/hawaii2017/C-0558.thumb.jpg	Leaf litter
NA	NA	C-0558	S-05520	Yes	Proliferating (25+)	22.077467	-159.413108	Kauai	Wild forest	Partially Obstructed	NA	NA	NA	NA	23.2	47.5	93.2	24.7	228.8045455	2017-08-09	08:54:00	0	Unknown	https://storage.googleapis.com/elegansvariation.org/photos/hawaii2017/C-0558.thumb.jpg	Leaf litter
NA	NA	C-0559	NA	No	NA	22.078697	-159.412983	Kauai	Wild forest	Partially Obstructed	no	NA	NA	NA	23.7	49	97.5	25.3	298.9457364	2017-08-09	08:59:00	NA	NA	https://storage.googleapis.com/elegansvariation.org/photos/hawaii2017/C-0559.thumb.jpg	Fruit
NA	NA	C-0560	S-05667	Yes	Very Few (1-3)	22.079822	-159.412728	Kauai	Wild forest	Partially Obstructed	no	NA	NA	NA	23.3	64	92.7	24.7	251.9270073	2017-08-09	09:09:00	0	Unknown	https://storage.googleapis.com/elegansvariation.org/photos/hawaii2017/C-0560.thumb.jpg	Leaf litter
NA	NA	C-0561	S-05231	Yes	Some (11-25)	21.995411	-159.377319	Kauai	Wild forest	Partially Obstructed	no	NA	NA	NA	23.9	69	95.5	27.4	241.2085561	2017-08-09	09:15:00	NA	NA	https://storage.googleapis.com/elegansvariation.org/photos/hawaii2017/C-0561.thumb.jpg	Fruit
NA	NA	C-0561	S-05232	Yes	Some (11-25)	21.995411	-159.377319	Kauai	Wild forest	Partially Obstructed	no	NA	NA	NA	23.9	69	95.5	27.4	241.2085561	2017-08-09	09:15:00	NA	NA	https://storage.googleapis.com/elegansvariation.org/photos/hawaii2017/C-0561.thumb.jpg	Fruit
NA	NA	C-0562	S-06510	Yes	Few (4-10)	21.138145	-156.965772	Molokai	Wild forest	Partially Obstructed	yes	20	A	0	23.7	67.5	65.7	27.4	766	2017-08-12	12:17:00	0	Unknown	https://storage.googleapis.com/elegansvariation.org/photos/hawaii2017/C-0562.thumb.jpg	Leaf litter
NA	NA	C-0563	NA	Tracks	NA	21.138192	-156.965661	Molokai	Wild forest	Partially Obstructed	yes	20	A	3	21.5	63	66.2	26	756.5766871	2017-08-12	12:22:00	NA	NA	https://storage.googleapis.com/elegansvariation.org/photos/hawaii2017/C-0563.thumb.jpg	Leaf litter
NA	NA	C-0564	NA	Tracks	NA	20.870576	-156.179811	Maui	Wild forest	Partially Obstructed	no	NA	NA	NA	25.6	63	65.8	28.4	205	2017-08-15	15:08:00	NA	NA	https://storage.googleapis.com/elegansvariation.org/photos/hawaii2017/C-0564.thumb.jpg	Fruit
NA	NA	C-0565	NA	No	NA	22.14295	-159.6417974	Kauai	Wild forest	Partially Obstructed	no	NA	NA	NA	17.1	38	65.2	22.6	1259	2017-08-08	11:18:00	NA	NA	https://storage.googleapis.com/elegansvariation.org/photos/hawaii2017/C-0565.thumb.jpg	Fruit
NA	NA	C-0566	S-05303	Yes	Very Few (1-3)	22.1214994	-159.6641103	Kauai	Wild forest	Obstructed	yes	4	B	2	15.4	52.5	74.4	18.8	1121	2017-08-07	08:19:00	NA	NA	https://storage.googleapis.com/elegansvariation.org/photos/hawaii2017/C-0566.thumb.jpg	Leaf litter
NA	NA	C-0567	NA	No	NA	22.12187081	-159.6644049	Kauai	Wild forest	Partially Obstructed	yes	4	D	2	15.7	46	77.6	18.1	1121	2017-08-07	08:24:00	NA	NA	https://storage.googleapis.com/elegansvariation.org/photos/hawaii2017/C-0567.thumb.jpg	Leaf litter
NA	NA	C-0568	NA	No	NA	22.121875	-159.664439	Kauai	Wild forest	Partially Obstructed	yes	4	D	3	15.9	38	77.6	18.1	1116.662338	2017-08-07	08:23:00	NA	NA	https://storage.googleapis.com/elegansvariation.org/photos/hawaii2017/C-0568.thumb.jpg	Leaf litter
NA	NA	C-0569	S-05260	Yes	Very Few (1-3)	22.121844	-159.664492	Kauai	Wild forest	Partially Obstructed	yes	4	E	2	16.8	50.5	77.5	18.8	1115.05102	2017-08-07	08:25:00	NA	NA	https://storage.googleapis.com/elegansvariation.org/photos/hawaii2017/C-0569.thumb.jpg	Leaf litter
NA	NA	C-0570	NA	No	NA	22.1495201	-159.6235273	Kauai	Wild forest	Full	no	NA	NA	NA	16.9	48	80	18.8	1219	2017-08-07	09:22:00	NA	NA	https://storage.googleapis.com/elegansvariation.org/photos/hawaii2017/C-0570.thumb.jpg	Leaf litter
NA	NA	C-0571	NA	No	NA	22.149479	-159.62353	Kauai	Wild forest	Partially Obstructed	no	NA	NA	NA	17.1	39	80	18	1219	2017-08-07	09:24:00	NA	NA	https://storage.googleapis.com/elegansvariation.org/photos/hawaii2017/C-0571.thumb.jpg	Fruit
NA	NA	C-0572	NA	Tracks	NA	22.15004209	-159.6228463	Kauai	Wild forest	Partially Obstructed	no	NA	NA	NA	17.1	NA	72.4	20.8	1220	2017-08-07	09:31:00	NA	NA	https://storage.googleapis.com/elegansvariation.org/photos/hawaii2017/C-0572.thumb.jpg	Leaf litter
NA	NA	C-0573	NA	No	NA	22.1514465	-159.6212967	Kauai	Wild forest	Partially Obstructed	no	NA	NA	NA	19	33.5	75	20.8	1230	2017-08-07	09:39:00	NA	NA	https://storage.googleapis.com/elegansvariation.org/photos/hawaii2017/C-0573.thumb.jpg	Flower
NA	NA	C-0574	NA	No	NA	22.1533803	-159.6197055	Kauai	Wild forest	Partially Obstructed	no	NA	NA	NA	17.7	44.5	67.5	21.5	1250	2017-08-07	09:52:00	NA	NA	https://storage.googleapis.com/elegansvariation.org/photos/hawaii2017/C-0574.thumb.jpg	Leaf litter
NA	NA	C-0575	NA	No	NA	22.154028	-159.619179	Kauai	Wild forest	Partially Obstructed	no	NA	NA	NA	18.2	47.5	64.8	23.6	1238	2017-08-07	09:56:00	NA	NA	https://storage.googleapis.com/elegansvariation.org/photos/hawaii2017/C-0575.thumb.jpg	Flower
NA	NA	C-0576	S-06677	Yes	Very Few (1-3)	20.672492	-156.334036	Maui	Wild forest	Partially Obstructed	no	NA	NA	NA	15.6	44.5	80.4	17.1	1948.672727	2017-08-14	09:43:00	0	Unknown	https://storage.googleapis.com/elegansvariation.org/photos/hawaii2017/C-0576.thumb.jpg	Leaf litter
NA	NA	C-0577	NA	No	NA	22.153873	-159.618819	Kauai	Wild forest	Partially Obstructed	no	NA	NA	NA	19.4	NA	67	24.9	1238	2017-08-07	09:58:00	NA	NA	https://storage.googleapis.com/elegansvariation.org/photos/hawaii2017/C-0577.thumb.jpg	Invertebrate
NA	NA	C-0578	NA	No	NA	22.1534567	-159.617266	Kauai	Wild forest	Partially Obstructed	no	NA	NA	NA	21.6	14	57.1	24.3	1250	2017-08-07	10:25:00	NA	NA	https://storage.googleapis.com/elegansvariation.org/photos/hawaii2017/C-0578.thumb.jpg	Fruit
NA	NA	C-0579	NA	No	NA	22.1510517	-159.6459426	Kauai	Rural garden	Full	no	NA	NA	NA	21.5	31	71.6	19.2	1255	2017-08-08	09:05:00	NA	NA	https://storage.googleapis.com/elegansvariation.org/photos/hawaii2017/C-0579.thumb.jpg	Flower
NA	NA	C-0580	NA	Tracks	NA	22.151857	-159.616136	Kauai	Wild forest	Partially Obstructed	no	NA	NA	NA	21.666666666666668	12.5	72.7	24.9	1228	2017-08-07	10:36:00	NA	NA	https://storage.googleapis.com/elegansvariation.org/photos/hawaii2017/C-0580.thumb.jpg	Leaf litter
NA	NA	C-0581	NA	No	NA	22.1499761	-159.6149992	Kauai	Wild forest	Partially Obstructed	no	NA	NA	NA	17.9	48	60.9	23.6	1213	2017-08-07	10:49:00	NA	NA	https://storage.googleapis.com/elegansvariation.org/photos/hawaii2017/C-0581.thumb.jpg	Invertebrate
NA	NA	C-0582	NA	No	NA	22.148081	-159.616589	Kauai	Wild forest	Obstructed	no	NA	NA	NA	18.1	48	67.6	22.2	1223.141892	2017-08-07	11:03:00	NA	NA	https://storage.googleapis.com/elegansvariation.org/photos/hawaii2017/C-0582.thumb.jpg	Invertebrate
NA	NA	C-0583	NA	No	NA	22.146186	-159.6112	Kauai	Wild forest	Partially Obstructed	no	NA	NA	NA	25.5	35	55.4	27.7	1223.216667	2017-08-07	11:46:00	NA	NA	https://storage.googleapis.com/elegansvariation.org/photos/hawaii2017/C-0583.thumb.jpg	Fruit
NA	NA	C-0584	NA	No	NA	22.1482089	-159.6044529	Kauai	Wild forest	Partially Obstructed	no	NA	NA	NA	20.7	37	61.3	26.3	1223	2017-08-07	12:11:00	NA	NA	https://storage.googleapis.com/elegansvariation.org/photos/hawaii2017/C-0584.thumb.jpg	Leaf litter
NA	NA	C-0585	NA	No	NA	22.152461	-159.600125	Kauai	Wild forest	Partially Obstructed	no	NA	NA	NA	35	12.5	68.3	23.6	1219.24359	2017-08-07	12:28:00	NA	NA	https://storage.googleapis.com/elegansvariation.org/photos/hawaii2017/C-0585.thumb.jpg	Vegetation
NA	NA	C-0586	NA	No	NA	22.154706	-159.599392	Kauai	Wild grassland	Full	no	NA	NA	NA	27.8	38.5	58.3	26.3	1233.124444	2017-08-07	12:37:00	NA	NA	https://storage.googleapis.com/elegansvariation.org/photos/hawaii2017/C-0586.thumb.jpg	Leaf litter
NA	NA	C-0587	NA	No	NA	22.1219	-159.664387	Kauai	Wild forest	Partially Obstructed	yes	4	E	3	16.2	9.5	78.9	17.8	1121	2017-08-07	08:26:00	NA	NA	https://storage.googleapis.com/elegansvariation.org/photos/hawaii2017/C-0587.thumb.jpg	Leaf litter
NA	NA	C-0588	S-05614	Yes	Few (4-10)	21.978942	-159.375083	Kauai	Wild forest	Partially Obstructed	no	NA	NA	NA	23.1	59.1	79.9	26	166.6885965	2017-08-09	08:14:00	0	Unknown	https://storage.googleapis.com/elegansvariation.org/photos/hawaii2017/C-0588.thumb.jpg	Leaf litter
NA	NA	C-0588	S-05615	Yes	Few (4-10)	21.978942	-159.375083	Kauai	Wild forest	Partially Obstructed	no	NA	NA	NA	23.1	59.1	79.9	26	166.6885965	2017-08-09	08:14:00	NA	NA	https://storage.googleapis.com/elegansvariation.org/photos/hawaii2017/C-0588.thumb.jpg	Leaf litter
NA	NA	C-0589	NA	Tracks	NA	22.121912	-159.664386	Kauai	Wild forest	Partially Obstructed	yes	4	F	3	16.5	NA	77.4	18.5	1121	2017-08-07	08:29:00	NA	NA	https://storage.googleapis.com/elegansvariation.org/photos/hawaii2017/C-0589.thumb.jpg	Leaf litter
NA	NA	C-0590	NA	No	NA	22.12187081	-159.6644049	Kauai	Wild forest	Partially Obstructed	yes	4	F	2	16.8	10	77.4	25.833333333333336	1121	2017-08-07	08:30:00	NA	NA	https://storage.googleapis.com/elegansvariation.org/photos/hawaii2017/C-0590.thumb.jpg	Leaf litter
NA	NA	C-0591	NA	No	NA	22.133733	-159.661294	Kauai	Wild forest	Full	no	NA	NA	NA	18.8	NA	82.8	19.88888888888889	1106.209524	2017-08-08	09:32:00	NA	NA	https://storage.googleapis.com/elegansvariation.org/photos/hawaii2017/C-0591.thumb.jpg	Fruit
NA	NA	C-0592	NA	Tracks	NA	22.134031	-159.661536	Kauai	Wild forest	Partially Obstructed	no	NA	NA	NA	17.2	58.5	70.6	21.944444444444446	1095.567164	2017-08-08	09:34:00	NA	NA	https://storage.googleapis.com/elegansvariation.org/photos/hawaii2017/C-0592.thumb.jpg	Fungus
NA	NA	C-0593	S-05393	Yes	Proliferating (25+)	22.133772	-159.661697	Kauai	Wild forest	Partially Obstructed	no	NA	NA	NA	17.7	26	80.4	19.88888888888889	1098.451754	2017-08-08	09:37:00	0	Unknown	https://storage.googleapis.com/elegansvariation.org/photos/hawaii2017/C-0593.thumb.jpg	Fungus
NA	NA	C-0593	S-05400	Yes	Proliferating (25+)	22.133772	-159.661697	Kauai	Wild forest	Partially Obstructed	no	NA	NA	NA	17.7	26	80.4	19.88888888888889	1098.451754	2017-08-08	09:37:00	0	Unknown	https://storage.googleapis.com/elegansvariation.org/photos/hawaii2017/C-0593.thumb.jpg	Fungus
NA	NA	C-0593	S-05402	Yes	Proliferating (25+)	22.133772	-159.661697	Kauai	Wild forest	Partially Obstructed	no	NA	NA	NA	17.7	26	80.4	19.88888888888889	1098.451754	2017-08-08	09:37:00	0	Unknown	https://storage.googleapis.com/elegansvariation.org/photos/hawaii2017/C-0593.thumb.jpg	Fungus
NA	NA	C-0593	S-05403	Yes	Proliferating (25+)	22.133772	-159.661697	Kauai	Wild forest	Partially Obstructed	no	NA	NA	NA	17.7	26	80.4	19.88888888888889	1098.451754	2017-08-08	09:37:00	1	Oscheius sp.	https://storage.googleapis.com/elegansvariation.org/photos/hawaii2017/C-0593.thumb.jpg	Fungus
NA	NA	C-0593	S-05404	Yes	Proliferating (25+)	22.133772	-159.661697	Kauai	Wild forest	Partially Obstructed	no	NA	NA	NA	17.7	26	80.4	19.88888888888889	1098.451754	2017-08-08	09:37:00	0	Unknown	https://storage.googleapis.com/elegansvariation.org/photos/hawaii2017/C-0593.thumb.jpg	Fungus
NA	NA	C-0593	S-05414	Yes	Proliferating (25+)	22.133772	-159.661697	Kauai	Wild forest	Partially Obstructed	no	NA	NA	NA	17.7	26	80.4	19.88888888888889	1098.451754	2017-08-08	09:37:00	1	Oscheius sp.	https://storage.googleapis.com/elegansvariation.org/photos/hawaii2017/C-0593.thumb.jpg	Fungus
NA	NA	C-0594	NA	No	NA	22.133706	-159.6621	Kauai	Wild forest	Partially Obstructed	no	NA	NA	NA	20.3	NA	80.9	19.88888888888889	1096.029557	2017-08-08	09:39:00	NA	NA	https://storage.googleapis.com/elegansvariation.org/photos/hawaii2017/C-0594.thumb.jpg	Fungus
NA	NA	C-0595	NA	No	NA	22.133764	-159.662167	Kauai	Wild forest	Full	no	NA	NA	NA	19.1	NA	81.3	20.555555555555557	1092.148649	2017-08-08	09:41:00	NA	NA	https://storage.googleapis.com/elegansvariation.org/photos/hawaii2017/C-0595.thumb.jpg	Fruit
NA	NA	C-0596	S-05443	Yes	Very Few (1-3)	22.133847	-159.662422	Kauai	Wild forest	Partially Obstructed	no	NA	NA	NA	18.7	66.5	81.3	20.555555555555557	1088.431373	2017-08-08	09:43:00	NA	NA	https://storage.googleapis.com/elegansvariation.org/photos/hawaii2017/C-0596.thumb.jpg	Fruit
NA	NA	C-0597	NA	No	NA	22.134217	-159.662922	Kauai	Wild forest	Partially Obstructed	no	NA	NA	NA	18	NA	81.3	20.555555555555557	1084.335366	2017-08-08	09:46:00	NA	NA	https://storage.googleapis.com/elegansvariation.org/photos/hawaii2017/C-0597.thumb.jpg	Fungus
NA	NA	C-0598	NA	No	NA	22.134256	-159.663589	Kauai	Wild forest	Partially Obstructed	no	NA	NA	NA	18.6	69.5	81.3	20.555555555555557	1082.262295	2017-08-08	09:50:00	NA	NA	https://storage.googleapis.com/elegansvariation.org/photos/hawaii2017/C-0598.thumb.jpg	Fungus
NA	NA	C-0599	NA	No	NA	22.141244	-159.649411	Kauai	Wild forest	Partially Obstructed	no	NA	NA	NA	18.6	67.5	65.7	23.333333333333336	1236.399015	2017-08-08	10:20:00	NA	NA	https://storage.googleapis.com/elegansvariation.org/photos/hawaii2017/C-0599.thumb.jpg	Leaf litter
NA	NA	C-0600	S-05521	Yes	Some (11-25)	22.141514	-159.650711	Kauai	Wild forest	Obstructed	no	NA	NA	NA	17.1	69	62.3	23.333333333333336	1249.838028	2017-08-08	10:27:00	NA	NA	https://storage.googleapis.com/elegansvariation.org/photos/hawaii2017/C-0600.thumb.jpg	Leaf litter
NA	NA	C-0600	S-05524	Yes	Some (11-25)	22.141514	-159.650711	Kauai	Wild forest	Obstructed	no	NA	NA	NA	17.1	69	62.3	23.333333333333336	1249.838028	2017-08-08	10:27:00	NA	NA	https://storage.googleapis.com/elegansvariation.org/photos/hawaii2017/C-0600.thumb.jpg	Leaf litter
NA	NA	C-0601	S-05330	Yes	Very Few (1-3)	22.121886	-159.664394	Kauai	Wild forest	Partially Obstructed	yes	4	A	0	15.8	28	78.4	18.5	1141.348315	2017-08-07	08:27:00	NA	NA	https://storage.googleapis.com/elegansvariation.org/photos/hawaii2017/C-0601.thumb.jpg	Leaf litter
NA	NA	C-0602	S-05362	Yes	Very Few (1-3)	22.148506	-159.616153	Kauai	Wild forest	Partially Obstructed	no	NA	NA	NA	17.7	48	56.4	25.3	1214.246154	2017-08-07	11:33:00	0	Unknown	https://storage.googleapis.com/elegansvariation.org/photos/hawaii2017/C-0602.thumb.jpg	Leaf litter
NA	NA	C-0603	S-05321	Yes	Very Few (1-3)	22.146131	-159.611828	Kauai	Wild forest	Obstructed	no	NA	NA	NA	18.4	48	60.9	24.5	1157.234234	2017-08-07	11:40:00	NA	NA	https://storage.googleapis.com/elegansvariation.org/photos/hawaii2017/C-0603.thumb.jpg	Leaf litter
NA	NA	C-0603	S-05322	Yes	Very Few (1-3)	22.146131	-159.611828	Kauai	Wild forest	Obstructed	no	NA	NA	NA	18.4	48	60.9	24.5	1157.234234	2017-08-07	11:40:00	NA	NA	https://storage.googleapis.com/elegansvariation.org/photos/hawaii2017/C-0603.thumb.jpg	Leaf litter
NA	NA	C-0603	S-05323	Yes	Very Few (1-3)	22.146131	-159.611828	Kauai	Wild forest	Obstructed	no	NA	NA	NA	18.4	48	60.9	24.5	1157.234234	2017-08-07	11:40:00	0	Unknown	https://storage.googleapis.com/elegansvariation.org/photos/hawaii2017/C-0603.thumb.jpg	Leaf litter
NA	NA	C-0604	S-05325	Yes	Very Few (1-3)	22.145906	-159.611519	Kauai	Wild forest	Obstructed	no	NA	NA	NA	19.2	42.5	66.5	24	1167.742424	2017-08-07	11:44:00	0	Unknown	https://storage.googleapis.com/elegansvariation.org/photos/hawaii2017/C-0604.thumb.jpg	Leaf litter
NA	NA	C-0604	S-05326	Yes	Very Few (1-3)	22.145906	-159.611519	Kauai	Wild forest	Obstructed	no	NA	NA	NA	19.2	42.5	66.5	24	1167.742424	2017-08-07	11:44:00	0	Unknown	https://storage.googleapis.com/elegansvariation.org/photos/hawaii2017/C-0604.thumb.jpg	Leaf litter
NA	NA	C-0604	S-05329	Yes	Very Few (1-3)	22.145906	-159.611519	Kauai	Wild forest	Obstructed	no	NA	NA	NA	19.2	42.5	66.5	24	1167.742424	2017-08-07	11:44:00	0	Unknown	https://storage.googleapis.com/elegansvariation.org/photos/hawaii2017/C-0604.thumb.jpg	Leaf litter
NA	NA	C-0605	NA	No	NA	22.146669	-159.6127	Kauai	Wild forest	Partially Obstructed	no	NA	NA	NA	20.5	45.5	61.8	24.7	1145.714976	2017-08-07	11:58:00	NA	NA	https://storage.googleapis.com/elegansvariation.org/photos/hawaii2017/C-0605.thumb.jpg	Leaf litter
NA	NA	C-0606	NA	Tracks	NA	22.086264	-159.670014	Kauai	Wild forest	Partially Obstructed	no	NA	NA	NA	21	48	71.6	24	1085.601562	2017-08-07	17:23:00	NA	NA	https://storage.googleapis.com/elegansvariation.org/photos/hawaii2017/C-0606.thumb.jpg	Leaf litter
NA	NA	C-0607	NA	No	NA	22.150253	-159.614975	Kauai	Wild forest	Partially Obstructed	no	NA	NA	NA	17.5	54.5	68.1	23.3	1218.428699	2017-08-07	10:52:00	NA	NA	https://storage.googleapis.com/elegansvariation.org/photos/hawaii2017/C-0607.thumb.jpg	Leaf litter
NA	NA	C-0609	NA	No	NA	22.121864	-159.664436	Kauai	Wild forest	Partially Obstructed	yes	4	E	1	15.9	43	76.5	18.5	1126.172043	2017-08-07	08:23:00	NA	NA	https://storage.googleapis.com/elegansvariation.org/photos/hawaii2017/C-0609.thumb.jpg	Leaf litter
NA	NA	C-0610	NA	Tracks	NA	22.153261	-159.6172	Kauai	Wild forest	Partially Obstructed	no	NA	NA	NA	21.9	39	68.7	21.5	1255.440678	2017-08-07	10:30:00	NA	NA	https://storage.googleapis.com/elegansvariation.org/photos/hawaii2017/C-0610.thumb.jpg	Leaf litter
NA	NA	C-0611	NA	No	NA	22.121825	-159.6643	Kauai	Wild forest	Partially Obstructed	yes	4	D	1	15.3	46.5	76.5	18.5	1119.254237	2017-08-07	08:21:00	NA	NA	https://storage.googleapis.com/elegansvariation.org/photos/hawaii2017/C-0611.thumb.jpg	Leaf litter
NA	NA	C-0612	NA	No	NA	22.121761	-159.664294	Kauai	Wild forest	Partially Obstructed	yes	4	C	1	14.9	36	77.7	18.5	1118.484848	2017-08-07	08:20:00	NA	NA	https://storage.googleapis.com/elegansvariation.org/photos/hawaii2017/C-0612.thumb.jpg	Leaf litter
NA	NA	C-0613	NA	No	NA	22.121858	-159.664458	Kauai	Wild forest	Partially Obstructed	yes	4	B	1	14.8	37	75	18.5	1124.896552	2017-08-07	08:17:00	NA	NA	https://storage.googleapis.com/elegansvariation.org/photos/hawaii2017/C-0613.thumb.jpg	Leaf litter
NA	NA	C-0614	NA	Tracks	NA	22.121839	-159.664469	Kauai	Wild forest	Partially Obstructed	yes	4	A	1	15.7	38	71	19.5	1127.982906	2017-08-07	08:13:00	NA	NA	https://storage.googleapis.com/elegansvariation.org/photos/hawaii2017/C-0614.thumb.jpg	Leaf litter
NA	NA	C-0615	NA	No	NA	22.121931	-159.664447	Kauai	Wild forest	Partially Obstructed	yes	4	A	3	15.2	35	66.4	20.5	1133.830357	2017-08-07	08:11:00	NA	NA	https://storage.googleapis.com/elegansvariation.org/photos/hawaii2017/C-0615.thumb.jpg	Leaf litter
NA	NA	C-0616	S-05807	Yes	Proliferating (25+)	21.96537236	-159.6143508	Kauai	Wild forest	Partially Obstructed	yes	10	E	1	20.1	52.5	60.5	23.3	1158.028409	2017-08-10	11:25:00	0	Unknown	https://storage.googleapis.com/elegansvariation.org/photos/hawaii2017/C-0616.thumb.jpg	Leaf litter
NA	NA	C-0616	S-05809	Yes	Proliferating (25+)	21.96537236	-159.6143508	Kauai	Wild forest	Partially Obstructed	yes	10	E	1	20.1	52.5	60.5	23.3	1158.028409	2017-08-10	11:25:00	0	Unknown	https://storage.googleapis.com/elegansvariation.org/photos/hawaii2017/C-0616.thumb.jpg	Leaf litter
NA	NA	C-0617	S-05692	Yes	Proliferating (25+)	21.96537236	-159.6143508	Kauai	Wild forest	Partially Obstructed	yes	10	C	1	18.5	39	64.3	23.3	1158.028409	2017-08-10	11:20:00	0	Unknown	https://storage.googleapis.com/elegansvariation.org/photos/hawaii2017/C-0617.thumb.jpg	Leaf litter
NA	NA	C-0617	S-05942	Yes	Proliferating (25+)	21.96537236	-159.6143508	Kauai	Wild forest	Partially Obstructed	yes	10	C	1	18.5	39	64.3	23.3	1158.028409	2017-08-10	11:20:00	0	Unknown	https://storage.googleapis.com/elegansvariation.org/photos/hawaii2017/C-0617.thumb.jpg	Leaf litter
NA	NA	C-0617	S-05943	Yes	Proliferating (25+)	21.96537236	-159.6143508	Kauai	Wild forest	Partially Obstructed	yes	10	C	1	18.5	39	64.3	23.3	1158.028409	2017-08-10	11:20:00	0	Unknown	https://storage.googleapis.com/elegansvariation.org/photos/hawaii2017/C-0617.thumb.jpg	Leaf litter
NA	NA	C-0618	NA	Tracks	NA	22.12394834	-159.7087518	Kauai	Wild forest	Partially Obstructed	no	NA	NA	NA	24.4	18	59	26.7	698	2017-08-10	09:29:00	NA	NA	https://storage.googleapis.com/elegansvariation.org/photos/hawaii2017/C-0618.thumb.jpg	Leaf litter
NA	NA	C-0619	S-05714	Yes	Proliferating (25+)	22.107367	-159.673369	Kauai	Wild forest	Partially Obstructed	no	NA	NA	NA	19	28	73.4	20.5	1040.178295	2017-08-10	08:30:00	0	Unknown	https://storage.googleapis.com/elegansvariation.org/photos/hawaii2017/C-0619.thumb.jpg	Leaf litter
NA	NA	C-0619	S-05717	Yes	Proliferating (25+)	22.107367	-159.673369	Kauai	Wild forest	Partially Obstructed	no	NA	NA	NA	19	28	73.4	20.5	1040.178295	2017-08-10	08:30:00	0	Unknown	https://storage.googleapis.com/elegansvariation.org/photos/hawaii2017/C-0619.thumb.jpg	Leaf litter
NA	NA	C-0619	S-05718	Yes	Proliferating (25+)	22.107367	-159.673369	Kauai	Wild forest	Partially Obstructed	no	NA	NA	NA	19	28	73.4	20.5	1040.178295	2017-08-10	08:30:00	NA	NA	https://storage.googleapis.com/elegansvariation.org/photos/hawaii2017/C-0619.thumb.jpg	Leaf litter
NA	NA	C-0620	S-06462	Yes	Very Few (1-3)	21.137994	-156.965933	Molokai	Wild forest	Partially Obstructed	yes	20	C	3	21.8	65	73.5	25.3	752.238806	2017-08-12	12:26:00	NA	NA	https://storage.googleapis.com/elegansvariation.org/photos/hawaii2017/C-0620.thumb.jpg	Leaf litter
NA	NA	C-0621	NA	Tracks	NA	20.88202	-156.515413	Maui	Wild forest	Partially Obstructed	no	NA	NA	NA	30.7	22	66.6	28.4	180	2017-08-13	11:43:00	NA	NA	https://storage.googleapis.com/elegansvariation.org/photos/hawaii2017/C-0621.thumb.jpg	Leaf litter
NA	NA	C-0622	S-06446	Yes	Very Few (1-3)	21.138017	-156.965847	Molokai	Wild forest	Partially Obstructed	yes	20	E	3	21.3	58	67.2	25.3	756.7776316	2017-08-12	12:30:00	0	Unknown	https://storage.googleapis.com/elegansvariation.org/photos/hawaii2017/C-0622.thumb.jpg	Fruit
NA	NA	C-0623	NA	No	NA	21.176075	-157.005031	Molokai	Wild forest	Partially Obstructed	no	NA	NA	NA	22.3	58.5	89.3	22.2	511.619469	2017-08-12	09:04:00	NA	NA	https://storage.googleapis.com/elegansvariation.org/photos/hawaii2017/C-0623.thumb.jpg	Fungus
NA	NA	C-0624	S-06460	Yes	Some (11-25)	21.177158	-157.005439	Molokai	Wild forest	Obstructed	yes	18	F	1	21.3	36.5	89.7	21.5	507.6340852	2017-08-12	08:49:00	0	Unknown	https://storage.googleapis.com/elegansvariation.org/photos/hawaii2017/C-0624.thumb.jpg	Leaf litter
NA	NA	C-0624	S-06461	Yes	Some (11-25)	21.177158	-157.005439	Molokai	Wild forest	Obstructed	yes	18	F	1	21.3	36.5	89.7	21.5	507.6340852	2017-08-12	08:49:00	0	Unknown	https://storage.googleapis.com/elegansvariation.org/photos/hawaii2017/C-0624.thumb.jpg	Leaf litter
NA	NA	C-0625	NA	No	NA	21.175444	-157.006187	Molokai	Wild forest	Partially Obstructed	no	NA	NA	NA	22	48	91.1	21.9	504	2017-08-12	09:16:00	NA	NA	https://storage.googleapis.com/elegansvariation.org/photos/hawaii2017/C-0625.thumb.jpg	Leaf litter
NA	NA	C-0626	S-05642	Yes	Very Few (1-3)	21.177153	-157.005386	Molokai	Wild forest	Partially Obstructed	yes	18	A	1	21.7	50	73.2	23.3	531.6826923	2017-08-12	08:36:00	NA	NA	https://storage.googleapis.com/elegansvariation.org/photos/hawaii2017/C-0626.thumb.jpg	Leaf litter
NA	NA	C-0627	S-06495	Yes	Very Few (1-3)	21.176986	-157.005517	Molokai	Wild forest	Partially Obstructed	yes	18	D	1	23.1	66	86.3	22.2	488.7848837	2017-08-12	08:44:00	0	Unknown	https://storage.googleapis.com/elegansvariation.org/photos/hawaii2017/C-0627.thumb.jpg	Leaf litter
NA	NA	C-0628	NA	No	NA	21.175572	-157.008131	Molokai	Wild forest	Partially Obstructed	yes	19	B	3	21.7	50.5	92.6	21.9	502.0326797	2017-08-12	09:35:00	NA	NA	https://storage.googleapis.com/elegansvariation.org/photos/hawaii2017/C-0628.thumb.jpg	Fungus
NA	NA	C-0629	NA	Tracks	NA	21.175608	-157.008278	Molokai	Wild forest	Partially Obstructed	yes	19	C	3	20.9	59	89.4	22.6	495.076087	2017-08-12	09:38:00	NA	NA	https://storage.googleapis.com/elegansvariation.org/photos/hawaii2017/C-0629.thumb.jpg	Leaf litter
NA	NA	C-0630	NA	Tracks	NA	21.175636	-157.008285	Molokai	Wild forest	Partially Obstructed	yes	19	E	2	21.1	66	82.8	24	491	2017-08-12	09:43:00	NA	NA	https://storage.googleapis.com/elegansvariation.org/photos/hawaii2017/C-0630.thumb.jpg	Leaf litter
NA	NA	C-0631	NA	No	NA	21.175453	-157.008339	Molokai	Wild forest	Partially Obstructed	yes	19	F	3	21.3	61.5	84.8	23.3	496.2056738	2017-08-12	09:45:00	NA	NA	https://storage.googleapis.com/elegansvariation.org/photos/hawaii2017/C-0631.thumb.jpg	Leaf litter
NA	NA	C-0632	S-06486	Yes	Some (11-25)	21.175719	-157.008247	Molokai	Wild forest	Partially Obstructed	yes	19	A	2	21.9	67	89.6	22.6	497.7321429	2017-08-12	09:32:00	0	Unknown	https://storage.googleapis.com/elegansvariation.org/photos/hawaii2017/C-0632.thumb.jpg	Fruit
NA	NA	C-0632	S-06487	Yes	Some (11-25)	21.175719	-157.008247	Molokai	Wild forest	Partially Obstructed	yes	19	A	2	21.9	67	89.6	22.6	497.7321429	2017-08-12	09:32:00	1	Oscheius sp.	https://storage.googleapis.com/elegansvariation.org/photos/hawaii2017/C-0632.thumb.jpg	Fruit
NA	NA	C-0633	NA	No	NA	21.175783	-157.008131	Molokai	Wild forest	Partially Obstructed	yes	19	D	3	21.3	66	89.2	22.6	496.5625571	2017-08-12	09:40:00	NA	NA	https://storage.googleapis.com/elegansvariation.org/photos/hawaii2017/C-0633.thumb.jpg	Leaf litter
NA	NA	C-0634	NA	Tracks	NA	21.175678	-157.008278	Molokai	Wild forest	Partially Obstructed	yes	19	A	0	22.8	69.5	87.2	22.6	498.5283019	2017-08-12	09:29:00	NA	NA	https://storage.googleapis.com/elegansvariation.org/photos/hawaii2017/C-0634.thumb.jpg	Leaf litter
NA	NA	C-0635	NA	Tracks	NA	21.175631	-157.008403	Molokai	Wild forest	Partially Obstructed	yes	19	E	3	21.2	60	82.8	24	496.2743902	2017-08-12	09:43:00	NA	NA	https://storage.googleapis.com/elegansvariation.org/photos/hawaii2017/C-0635.thumb.jpg	Leaf litter
NA	NA	C-0636	S-06457	Yes	Very Few (1-3)	21.175561	-157.008278	Molokai	Wild forest	Partially Obstructed	yes	19	C	1	21.3	58.5	89.4	22.6	499.0214286	2017-08-12	09:37:00	NA	NA	https://storage.googleapis.com/elegansvariation.org/photos/hawaii2017/C-0636.thumb.jpg	Leaf litter
NA	NA	C-0637	S-06470	Yes	Some (11-25)	21.175628	-157.008272	Molokai	Wild forest	Partially Obstructed	no	NA	NA	NA	21.9	48	80.5	23.4	493.8029557	2017-08-12	09:50:00	0	Unknown	https://storage.googleapis.com/elegansvariation.org/photos/hawaii2017/C-0637.thumb.jpg	Flower
NA	NA	C-0637	S-06479	Yes	Some (11-25)	21.175628	-157.008272	Molokai	Wild forest	Partially Obstructed	no	NA	NA	NA	21.9	48	80.5	23.4	493.8029557	2017-08-12	09:50:00	0	Unknown	https://storage.googleapis.com/elegansvariation.org/photos/hawaii2017/C-0637.thumb.jpg	Flower
NA	NA	C-0637	S-06480	Yes	Some (11-25)	21.175628	-157.008272	Molokai	Wild forest	Partially Obstructed	no	NA	NA	NA	21.9	48	80.5	23.4	493.8029557	2017-08-12	09:50:00	0	Unknown	https://storage.googleapis.com/elegansvariation.org/photos/hawaii2017/C-0637.thumb.jpg	Flower
NA	NA	C-0638	NA	Tracks	NA	21.175514	-157.008275	Molokai	Wild forest	Partially Obstructed	yes	19	D	1	21.4	64	89.2	22.6	499.1627907	2017-08-12	09:41:00	NA	NA	https://storage.googleapis.com/elegansvariation.org/photos/hawaii2017/C-0638.thumb.jpg	Leaf litter
NA	NA	C-0639	S-06511	Yes	Very Few (1-3)	21.175619	-157.008375	Molokai	Wild forest	Partially Obstructed	yes	19	E	1	21.6	63	80.6	24	501.5228758	2017-08-12	09:43:00	0	Unknown	https://storage.googleapis.com/elegansvariation.org/photos/hawaii2017/C-0639.thumb.jpg	Leaf litter
NA	NA	C-0640	S-06512	Yes	Very Few (1-3)	21.175638	-157.008266	Molokai	Wild forest	Partially Obstructed	yes	19	F	2	21.3	68	84.8	23.3	491	2017-08-12	09:45:00	0	Unknown	https://storage.googleapis.com/elegansvariation.org/photos/hawaii2017/C-0640.thumb.jpg	Leaf litter
NA	NA	C-0641	NA	Tracks	NA	21.175617	-157.008225	Molokai	Wild forest	Partially Obstructed	yes	19	F	1	21.6	44.5	84.8	23.3	497.8331242	2017-08-12	09:46:00	NA	NA	https://storage.googleapis.com/elegansvariation.org/photos/hawaii2017/C-0641.thumb.jpg	Leaf litter
NA	NA	C-0642	NA	No	NA	21.17607655	-157.0050491	Molokai	Wild forest	Partially Obstructed	yes	19	A	1	22.1	54	89.6	22.6	503.3638393	2017-08-12	09:32:00	NA	NA	https://storage.googleapis.com/elegansvariation.org/photos/hawaii2017/C-0642.thumb.jpg	Leaf litter
NA	NA	C-0643	NA	No	NA	21.175278	-157.006269	Molokai	Wild forest	Partially Obstructed	no	NA	NA	NA	22.7	65.5	92.6	21.9	502.2534247	2017-08-12	09:16:00	NA	NA	https://storage.googleapis.com/elegansvariation.org/photos/hawaii2017/C-0643.thumb.jpg	Leaf litter
NA	NA	C-0644	NA	Tracks	NA	21.176078	-157.00505	Molokai	Wild forest	Partially Obstructed	yes	19	B	1	21.4	64	92.6	21.9	508.9955357	2017-08-12	09:35:00	NA	NA	https://storage.googleapis.com/elegansvariation.org/photos/hawaii2017/C-0644.thumb.jpg	Leaf litter
NA	NA	C-0645	S-06482	Yes	Some (11-25)	21.177225	-157.005756	Molokai	Wild forest	Partially Obstructed	yes	18	B	1	21.4	51	85.9	22.2	536.5702479	2017-08-12	08:40:00	0	Unknown	https://storage.googleapis.com/elegansvariation.org/photos/hawaii2017/C-0645.thumb.jpg	Leaf litter
NA	NA	C-0645	S-06483	Yes	Some (11-25)	21.177225	-157.005756	Molokai	Wild forest	Partially Obstructed	yes	18	B	1	21.4	51	85.9	22.2	536.5702479	2017-08-12	08:40:00	0	Unknown	https://storage.googleapis.com/elegansvariation.org/photos/hawaii2017/C-0645.thumb.jpg	Leaf litter
NA	NA	C-0646	NA	Tracks	NA	21.137981	-156.96595	Molokai	Wild forest	Partially Obstructed	yes	20	D	3	20.8	61.5	72	25.3	753.1030928	2017-08-12	12:28:00	NA	NA	https://storage.googleapis.com/elegansvariation.org/photos/hawaii2017/C-0646.thumb.jpg	Leaf litter
NA	NA	C-0647	S-06450	Yes	Very Few (1-3)	21.176989	-157.005344	Molokai	Wild forest	Partially Obstructed	yes	18	C	1	22	53.5	87.3	22.2	522.6443769	2017-08-12	08:41:00	NA	NA	https://storage.googleapis.com/elegansvariation.org/photos/hawaii2017/C-0647.thumb.jpg	Leaf litter
NA	NA	C-0648	S-06445	Yes	Very Few (1-3)	21.177225	-157.005483	Molokai	Wild forest	Partially Obstructed	yes	18	E	1	21.2	49.5	86.3	21.5	557.5041322	2017-08-12	08:47:00	NA	NA	https://storage.googleapis.com/elegansvariation.org/photos/hawaii2017/C-0648.thumb.jpg	Leaf litter
NA	NA	C-0649	NA	Tracks	NA	22.128939	-159.645311	Kauai	Wild forest	Partially Obstructed	no	NA	NA	NA	19.5	NA	55	24.66666666666667	1103.85	2017-08-08	11:42:00	NA	NA	https://storage.googleapis.com/elegansvariation.org/photos/hawaii2017/C-0649.thumb.jpg	Flower
NA	NA	C-0650	S-05454	Yes	Few (4-10)	22.124942	-159.651233	Kauai	Wild forest	Partially Obstructed	no	NA	NA	NA	19.8	58.5	41.3	30.166666666666668	1094.179245	2017-08-08	12:08:00	0	Unknown	https://storage.googleapis.com/elegansvariation.org/photos/hawaii2017/C-0650.thumb.jpg	Leaf litter
NA	NA	C-0651	S-05502	Yes	Very Few (1-3)	22.131517	-159.660483	Kauai	Wild forest	Partially Obstructed	yes	6	B	3	18.5	67	76.3	19.88888888888889	1170.595745	2017-08-08	09:02:00	0	Unknown	https://storage.googleapis.com/elegansvariation.org/photos/hawaii2017/C-0651.thumb.jpg	Leaf litter
NA	NA	C-0652	S-05316	Yes	Very Few (1-3)	22.125197	-159.650444	Kauai	Wild forest	Partially Obstructed	no	NA	NA	NA	20.7	NA	52.9	NA	1080.36036	2017-08-08	12:05:00	NA	NA	https://storage.googleapis.com/elegansvariation.org/photos/hawaii2017/C-0652.thumb.jpg	Vegetation
NA	NA	C-0652	S-05318	Yes	Very Few (1-3)	22.125197	-159.650444	Kauai	Wild forest	Partially Obstructed	no	NA	NA	NA	20.7	NA	52.9	NA	1080.36036	2017-08-08	12:05:00	NA	NA	https://storage.googleapis.com/elegansvariation.org/photos/hawaii2017/C-0652.thumb.jpg	Vegetation
NA	NA	C-0653	S-05347	Yes	Very Few (1-3)	22.131581	-159.660472	Kauai	Wild forest	Partially Obstructed	yes	6	B	2	17.2	65.5	75.4	19.88888888888889	1169.733032	2017-08-08	09:04:00	0	Unknown	https://storage.googleapis.com/elegansvariation.org/photos/hawaii2017/C-0653.thumb.jpg	Leaf litter
NA	NA	C-0654	NA	No	NA	22.131578	-159.660444	Kauai	Wild forest	Partially Obstructed	yes	6	C	1	16.8	52	78.4	19.166666666666668	1169.581081	2017-08-08	09:01:00	NA	NA	https://storage.googleapis.com/elegansvariation.org/photos/hawaii2017/C-0654.thumb.jpg	Leaf litter
NA	NA	C-0655	NA	Tracks	NA	22.131611	-159.660481	Kauai	Wild forest	Partially Obstructed	yes	6	D	2	16.4	55	78.4	19.183333333333334	1169.37931	2017-08-08	09:00:00	NA	NA	https://storage.googleapis.com/elegansvariation.org/photos/hawaii2017/C-0655.thumb.jpg	Leaf litter
NA	NA	C-0656	S-05342	Yes	Very Few (1-3)	22.131533	-159.660475	Kauai	Wild forest	Partially Obstructed	yes	6	D	1	16.4	67	78.4	19.166666666666668	1170.22619	2017-08-08	08:59:00	NA	NA	https://storage.googleapis.com/elegansvariation.org/photos/hawaii2017/C-0656.thumb.jpg	Leaf litter
NA	NA	C-0657	S-05391	Yes	Very Few (1-3)	22.13155	-159.660417	Kauai	Wild forest	Partially Obstructed	yes	6	E	2	16.5	59	78.4	19.166666666666668	1169.635593	2017-08-08	08:58:00	NA	NA	https://storage.googleapis.com/elegansvariation.org/photos/hawaii2017/C-0657.thumb.jpg	Leaf litter
NA	NA	C-0657	S-05409	Yes	Very Few (1-3)	22.13155	-159.660417	Kauai	Wild forest	Partially Obstructed	yes	6	E	2	16.5	59	78.4	19.166666666666668	1169.635593	2017-08-08	08:58:00	NA	NA	https://storage.googleapis.com/elegansvariation.org/photos/hawaii2017/C-0657.thumb.jpg	Leaf litter
NA	NA	C-0658	S-05434	Yes	Some (11-25)	22.131444	-159.660425	Kauai	Wild forest	Partially Obstructed	yes	6	E	3	16.7	51.5	78.4	19.166666666666668	1170.800305	2017-08-08	08:57:00	0	Unknown	https://storage.googleapis.com/elegansvariation.org/photos/hawaii2017/C-0658.thumb.jpg	Leaf litter
NA	NA	C-0658	S-05455	Yes	Some (11-25)	22.131444	-159.660425	Kauai	Wild forest	Partially Obstructed	yes	6	E	3	16.7	51.5	78.4	19.166666666666668	1170.800305	2017-08-08	08:57:00	NA	NA	https://storage.googleapis.com/elegansvariation.org/photos/hawaii2017/C-0658.thumb.jpg	Leaf litter
NA	NA	C-0658	S-05456	Yes	Some (11-25)	22.131444	-159.660425	Kauai	Wild forest	Partially Obstructed	yes	6	E	3	16.7	51.5	78.4	19.166666666666668	1170.800305	2017-08-08	08:57:00	NA	NA	https://storage.googleapis.com/elegansvariation.org/photos/hawaii2017/C-0658.thumb.jpg	Leaf litter
NA	NA	C-0659	S-05488	Yes	Very Few (1-3)	22.131481	-159.660469	Kauai	Wild forest	Partially Obstructed	yes	6	A	0	15.8	57	76	19.88888888888889	1170.909677	2017-08-08	08:52:00	0	Unknown	https://storage.googleapis.com/elegansvariation.org/photos/hawaii2017/C-0659.thumb.jpg	Leaf litter
NA	NA	C-0660	NA	Tracks	NA	22.131403	-159.660369	Kauai	Wild forest	Partially Obstructed	no	NA	NA	NA	16	62	78.4	18.5	1170.088435	2017-08-08	08:50:00	NA	NA	https://storage.googleapis.com/elegansvariation.org/photos/hawaii2017/C-0660.thumb.jpg	Leaf litter
NA	NA	C-0661	NA	Tracks	NA	22.141961	-159.652769	Kauai	Wild forest	Obstructed	no	NA	NA	NA	16.8	65.5	69.1	23.333333333333336	1232.082569	2017-08-08	10:34:00	NA	NA	https://storage.googleapis.com/elegansvariation.org/photos/hawaii2017/C-0661.thumb.jpg	Leaf litter
NA	NA	C-0662	NA	No	NA	22.142342	-159.653297	Kauai	Wild forest	Obstructed	no	NA	NA	NA	17.8	NA	61.5	25	1223.382353	2017-08-08	10:37:00	NA	NA	https://storage.googleapis.com/elegansvariation.org/photos/hawaii2017/C-0662.thumb.jpg	Vegetation
NA	NA	C-0663	NA	Tracks	NA	22.142539	-159.653425	Kauai	Wild forest	Obstructed	no	NA	NA	NA	18.1	69	63.4	23.333333333333336	1220.918919	2017-08-08	10:40:00	NA	NA	https://storage.googleapis.com/elegansvariation.org/photos/hawaii2017/C-0663.thumb.jpg	Leaf litter
NA	NA	C-0664	NA	Tracks	NA	22.143375	-159.654581	Kauai	Wild forest	Obstructed	no	NA	NA	NA	17	51	68.2	22.611111111111114	1224.248619	2017-08-08	10:45:00	NA	NA	https://storage.googleapis.com/elegansvariation.org/photos/hawaii2017/C-0664.thumb.jpg	Leaf litter
NA	NA	C-0665	NA	No	NA	22.143836	-159.655708	Kauai	Wild forest	Obstructed	no	NA	NA	NA	24.8	NA	67.1	23.333333333333336	1208.968421	2017-08-08	10:49:00	NA	NA	https://storage.googleapis.com/elegansvariation.org/photos/hawaii2017/C-0665.thumb.jpg	Fruit
NA	NA	C-0666	S-05421	Yes	Few (4-10)	22.143814	-159.655528	Kauai	Wild forest	Partially Obstructed	no	NA	NA	NA	20.8	68	55	26.05555555555556	1206.162162	2017-08-08	11:15:00	1	C. briggsae	https://storage.googleapis.com/elegansvariation.org/photos/hawaii2017/C-0666.thumb.jpg	Leaf litter
NA	NA	C-0666	S-05422	Yes	Few (4-10)	22.143814	-159.655528	Kauai	Wild forest	Partially Obstructed	no	NA	NA	NA	20.8	68	55	26.05555555555556	1206.162162	2017-08-08	11:15:00	NA	NA	https://storage.googleapis.com/elegansvariation.org/photos/hawaii2017/C-0666.thumb.jpg	Leaf litter
NA	NA	C-0666	S-05423	Yes	Few (4-10)	22.143814	-159.655528	Kauai	Wild forest	Partially Obstructed	no	NA	NA	NA	20.8	68	55	26.05555555555556	1206.162162	2017-08-08	11:15:00	NA	NA	https://storage.googleapis.com/elegansvariation.org/photos/hawaii2017/C-0666.thumb.jpg	Leaf litter
NA	NA	C-0667	NA	Tracks	NA	22.127789	-159.649608	Kauai	Wild forest	Partially Obstructed	no	NA	NA	NA	17.9	65	61.2	23.333333333333336	1094.264463	2017-08-08	11:17:00	NA	NA	https://storage.googleapis.com/elegansvariation.org/photos/hawaii2017/C-0667.thumb.jpg	Leaf litter
NA	NA	C-0668	NA	No	NA	22.129539	-159.642553	Kauai	Wild forest	Partially Obstructed	no	NA	NA	NA	25.1	NA	62	23.722222222222225	1109.920635	2017-08-08	11:29:00	NA	NA	https://storage.googleapis.com/elegansvariation.org/photos/hawaii2017/C-0668.thumb.jpg	Fruit
NA	NA	C-0669	NA	No	NA	22.127189	-159.642214	Kauai	Wild forest	Partially Obstructed	no	NA	NA	NA	19.1	NA	53.5	24.66666666666667	1154.013333	2017-08-08	11:38:00	NA	NA	https://storage.googleapis.com/elegansvariation.org/photos/hawaii2017/C-0669.thumb.jpg	Flower
NA	NA	C-0670	S-05395	Yes	Very Few (1-3)	22.129983	-159.660244	Kauai	Wild forest	Partially Obstructed	no	NA	NA	NA	16.7	56	74.1	18.8	1134.516129	2017-08-08	08:38:00	NA	NA	https://storage.googleapis.com/elegansvariation.org/photos/hawaii2017/C-0670.thumb.jpg	Leaf litter
NA	NA	C-0670	S-05396	Yes	Very Few (1-3)	22.129983	-159.660244	Kauai	Wild forest	Partially Obstructed	no	NA	NA	NA	16.7	56	74.1	18.8	1134.516129	2017-08-08	08:38:00	NA	NA	https://storage.googleapis.com/elegansvariation.org/photos/hawaii2017/C-0670.thumb.jpg	Leaf litter
NA	NA	C-0671	NA	No	NA	22.130222	-159.660194	Kauai	Wild forest	Partially Obstructed	no	NA	NA	NA	17.1	NA	75.6	19.5	1135.99375	2017-08-08	08:41:00	NA	NA	https://storage.googleapis.com/elegansvariation.org/photos/hawaii2017/C-0671.thumb.jpg	Invertebrate
NA	NA	C-0672	NA	Tracks	NA	22.130597	-159.66035	Kauai	Wild forest	Partially Obstructed	no	NA	NA	NA	18	54	75.2	19.5	1140.713333	2017-08-08	08:43:00	NA	NA	https://storage.googleapis.com/elegansvariation.org/photos/hawaii2017/C-0672.thumb.jpg	Leaf litter
NA	NA	C-0673	NA	No	NA	22.133714	-159.661997	Kauai	Wild forest	Partially Obstructed	no	NA	NA	NA	19.7	NA	81.7	19.5	1088.52	2017-08-08	09:39:00	NA	NA	https://storage.googleapis.com/elegansvariation.org/photos/hawaii2017/C-0673.thumb.jpg	Fungus
NA	NA	C-0674	S-05336	Yes	Few (4-10)	22.134392	-159.662928	Kauai	Wild forest	Obstructed	no	NA	NA	NA	18	56	74.1	20.1	1069.532609	2017-08-08	09:47:00	0	Unknown	https://storage.googleapis.com/elegansvariation.org/photos/hawaii2017/C-0674.thumb.jpg	Leaf litter
NA	NA	C-0674	S-05339	Yes	Few (4-10)	22.134392	-159.662928	Kauai	Wild forest	Obstructed	no	NA	NA	NA	18	56	74.1	20.1	1069.532609	2017-08-08	09:47:00	NA	NA	https://storage.googleapis.com/elegansvariation.org/photos/hawaii2017/C-0674.thumb.jpg	Leaf litter
NA	NA	C-0674	S-05340	Yes	Few (4-10)	22.134392	-159.662928	Kauai	Wild forest	Obstructed	no	NA	NA	NA	18	56	74.1	20.1	1069.532609	2017-08-08	09:47:00	NA	NA	https://storage.googleapis.com/elegansvariation.org/photos/hawaii2017/C-0674.thumb.jpg	Leaf litter
NA	NA	C-0674	S-05341	Yes	Few (4-10)	22.134392	-159.662928	Kauai	Wild forest	Obstructed	no	NA	NA	NA	18	56	74.1	20.1	1069.532609	2017-08-08	09:47:00	0	Unknown	https://storage.googleapis.com/elegansvariation.org/photos/hawaii2017/C-0674.thumb.jpg	Leaf litter
NA	NA	C-0675	S-05435	Yes	Few (4-10)	22.134589	-159.663578	Kauai	Wild forest	Obstructed	no	NA	NA	NA	18.9	59.5	77.1	20.1	1072.288136	2017-08-08	09:49:00	NA	NA	https://storage.googleapis.com/elegansvariation.org/photos/hawaii2017/C-0675.thumb.jpg	Leaf litter
NA	NA	C-0675	S-05436	Yes	Few (4-10)	22.134589	-159.663578	Kauai	Wild forest	Obstructed	no	NA	NA	NA	18.9	59.5	77.1	20.1	1072.288136	2017-08-08	09:49:00	NA	NA	https://storage.googleapis.com/elegansvariation.org/photos/hawaii2017/C-0675.thumb.jpg	Leaf litter
NA	NA	C-0676	S-05377	Yes	Few (4-10)	22.123297	-159.656228	Kauai	Wild forest	Obstructed	no	NA	NA	NA	17.1	54.5	56	23.6	1154.926471	2017-08-08	12:29:00	NA	NA	https://storage.googleapis.com/elegansvariation.org/photos/hawaii2017/C-0676.thumb.jpg	Leaf litter
NA	NA	C-0676	S-05379	Yes	Few (4-10)	22.123297	-159.656228	Kauai	Wild forest	Obstructed	no	NA	NA	NA	17.1	54.5	56	23.6	1154.926471	2017-08-08	12:29:00	NA	NA	https://storage.googleapis.com/elegansvariation.org/photos/hawaii2017/C-0676.thumb.jpg	Leaf litter
NA	NA	C-0676	S-05380	Yes	Few (4-10)	22.123297	-159.656228	Kauai	Wild forest	Obstructed	no	NA	NA	NA	17.1	54.5	56	23.6	1154.926471	2017-08-08	12:29:00	NA	NA	https://storage.googleapis.com/elegansvariation.org/photos/hawaii2017/C-0676.thumb.jpg	Leaf litter
NA	NA	C-0676	S-05442	Yes	Few (4-10)	22.123297	-159.656228	Kauai	Wild forest	Obstructed	no	NA	NA	NA	17.1	54.5	56	23.6	1154.926471	2017-08-08	12:29:00	0	Unknown	https://storage.googleapis.com/elegansvariation.org/photos/hawaii2017/C-0676.thumb.jpg	Leaf litter
NA	NA	C-0677	S-05417	Yes	Some (11-25)	22.12295	-159.656883	Kauai	Wild forest	Obstructed	no	NA	NA	NA	17.1	52.5	58.3	23.6	1154.882353	2017-08-08	12:33:00	0	Unknown	https://storage.googleapis.com/elegansvariation.org/photos/hawaii2017/C-0677.thumb.jpg	Leaf litter
NA	NA	C-0677	S-05418	Yes	Some (11-25)	22.12295	-159.656883	Kauai	Wild forest	Obstructed	no	NA	NA	NA	17.1	52.5	58.3	23.6	1154.882353	2017-08-08	12:33:00	1	Oscheius sp.	https://storage.googleapis.com/elegansvariation.org/photos/hawaii2017/C-0677.thumb.jpg	Leaf litter
NA	NA	C-0677	S-05445	Yes	Some (11-25)	22.12295	-159.656883	Kauai	Wild forest	Obstructed	no	NA	NA	NA	17.1	52.5	58.3	23.6	1154.882353	2017-08-08	12:33:00	NA	NA	https://storage.googleapis.com/elegansvariation.org/photos/hawaii2017/C-0677.thumb.jpg	Leaf litter
NA	NA	C-0677	S-05446	Yes	Some (11-25)	22.12295	-159.656883	Kauai	Wild forest	Obstructed	no	NA	NA	NA	17.1	52.5	58.3	23.6	1154.882353	2017-08-08	12:33:00	NA	NA	https://storage.googleapis.com/elegansvariation.org/photos/hawaii2017/C-0677.thumb.jpg	Leaf litter
NA	NA	C-0677	S-05451	Yes	Some (11-25)	22.12295	-159.656883	Kauai	Wild forest	Obstructed	no	NA	NA	NA	17.1	52.5	58.3	23.6	1154.882353	2017-08-08	12:33:00	NA	NA	https://storage.googleapis.com/elegansvariation.org/photos/hawaii2017/C-0677.thumb.jpg	Leaf litter
NA	NA	C-0677	S-05452	Yes	Some (11-25)	22.12295	-159.656883	Kauai	Wild forest	Obstructed	no	NA	NA	NA	17.1	52.5	58.3	23.6	1154.882353	2017-08-08	12:33:00	0	Unknown	https://storage.googleapis.com/elegansvariation.org/photos/hawaii2017/C-0677.thumb.jpg	Leaf litter
NA	NA	C-0678	S-05425	Yes	Some (11-25)	22.122489	-159.657331	Kauai	Wild forest	Partially Obstructed	no	NA	NA	NA	20.4	55	59.7	23.6	1146.925532	2017-08-08	12:37:00	NA	NA	https://storage.googleapis.com/elegansvariation.org/photos/hawaii2017/C-0678.thumb.jpg	Leaf litter
NA	NA	C-0678	S-05426	Yes	Some (11-25)	22.122489	-159.657331	Kauai	Wild forest	Partially Obstructed	no	NA	NA	NA	20.4	55	59.7	23.6	1146.925532	2017-08-08	12:37:00	NA	NA	https://storage.googleapis.com/elegansvariation.org/photos/hawaii2017/C-0678.thumb.jpg	Leaf litter
NA	NA	C-0678	S-05427	Yes	Some (11-25)	22.122489	-159.657331	Kauai	Wild forest	Partially Obstructed	no	NA	NA	NA	20.4	55	59.7	23.6	1146.925532	2017-08-08	12:37:00	0	Unknown	https://storage.googleapis.com/elegansvariation.org/photos/hawaii2017/C-0678.thumb.jpg	Leaf litter
NA	NA	C-0678	S-05428	Yes	Some (11-25)	22.122489	-159.657331	Kauai	Wild forest	Partially Obstructed	no	NA	NA	NA	20.4	55	59.7	23.6	1146.925532	2017-08-08	12:37:00	NA	NA	https://storage.googleapis.com/elegansvariation.org/photos/hawaii2017/C-0678.thumb.jpg	Leaf litter
NA	NA	C-0678	S-05431	Yes	Some (11-25)	22.122489	-159.657331	Kauai	Wild forest	Partially Obstructed	no	NA	NA	NA	20.4	55	59.7	23.6	1146.925532	2017-08-08	12:37:00	NA	NA	https://storage.googleapis.com/elegansvariation.org/photos/hawaii2017/C-0678.thumb.jpg	Leaf litter
NA	NA	C-0678	S-05432	Yes	Some (11-25)	22.122489	-159.657331	Kauai	Wild forest	Partially Obstructed	no	NA	NA	NA	20.4	55	59.7	23.6	1146.925532	2017-08-08	12:37:00	0	Unknown	https://storage.googleapis.com/elegansvariation.org/photos/hawaii2017/C-0678.thumb.jpg	Leaf litter
NA	NA	C-0679	S-05382	Yes	Some (11-25)	22.124969	-159.651233	Kauai	Wild forest	Obstructed	no	NA	NA	NA	22.4	41.5	49.5	27.7	1104.089552	2017-08-08	12:09:00	NA	NA	https://storage.googleapis.com/elegansvariation.org/photos/hawaii2017/C-0679.thumb.jpg	Leaf litter
NA	NA	C-0679	S-05383	Yes	Some (11-25)	22.124969	-159.651233	Kauai	Wild forest	Obstructed	no	NA	NA	NA	22.4	41.5	49.5	27.7	1104.089552	2017-08-08	12:09:00	0	Unknown	https://storage.googleapis.com/elegansvariation.org/photos/hawaii2017/C-0679.thumb.jpg	Leaf litter
NA	NA	C-0679	S-05392	Yes	Some (11-25)	22.124969	-159.651233	Kauai	Wild forest	Obstructed	no	NA	NA	NA	22.4	41.5	49.5	27.7	1104.089552	2017-08-08	12:09:00	NA	NA	https://storage.googleapis.com/elegansvariation.org/photos/hawaii2017/C-0679.thumb.jpg	Leaf litter
NA	NA	C-0679	S-05410	Yes	Some (11-25)	22.124969	-159.651233	Kauai	Wild forest	Obstructed	no	NA	NA	NA	22.4	41.5	49.5	27.7	1104.089552	2017-08-08	12:09:00	0	Unknown	https://storage.googleapis.com/elegansvariation.org/photos/hawaii2017/C-0679.thumb.jpg	Leaf litter
NA	NA	C-0680	S-05494	Yes	Few (4-10)	22.121489	-159.658058	Kauai	Wild forest	Partially Obstructed	no	NA	NA	NA	18.9	55.5	63.5	22.9	1142.892473	2017-08-08	12:42:00	NA	NA	https://storage.googleapis.com/elegansvariation.org/photos/hawaii2017/C-0680.thumb.jpg	Leaf litter
NA	NA	C-0680	S-05495	Yes	Few (4-10)	22.121489	-159.658058	Kauai	Wild forest	Partially Obstructed	no	NA	NA	NA	18.9	55.5	63.5	22.9	1142.892473	2017-08-08	12:42:00	0	Unknown	https://storage.googleapis.com/elegansvariation.org/photos/hawaii2017/C-0680.thumb.jpg	Leaf litter
NA	NA	C-0681	NA	No	NA	22.124422	-159.654969	Kauai	Wild forest	Partially Obstructed	no	NA	NA	NA	19.5	36	54	23.6	1147.956522	2017-08-08	12:20:00	NA	NA	https://storage.googleapis.com/elegansvariation.org/photos/hawaii2017/C-0681.thumb.jpg	Leaf litter
NA	NA	C-0682	S-05351	Yes	Very Few (1-3)	22.120481	-159.658325	Kauai	Wild forest	Partially Obstructed	no	NA	NA	NA	19.7	56.5	60.9	22.9	1137.522124	2017-08-08	12:45:00	0	Unknown	https://storage.googleapis.com/elegansvariation.org/photos/hawaii2017/C-0682.thumb.jpg	Leaf litter
NA	NA	C-0682	S-05398	Yes	Very Few (1-3)	22.120481	-159.658325	Kauai	Wild forest	Partially Obstructed	no	NA	NA	NA	19.7	56.5	60.9	22.9	1137.522124	2017-08-08	12:45:00	0	Unknown	https://storage.googleapis.com/elegansvariation.org/photos/hawaii2017/C-0682.thumb.jpg	Leaf litter
NA	NA	C-0683	S-05365	Yes	Few (4-10)	22.123311	-159.65635	Kauai	Wild forest	Partially Obstructed	no	NA	NA	NA	17.6	56	51.7	23.6	1154.406504	2017-08-08	12:28:00	NA	NA	https://storage.googleapis.com/elegansvariation.org/photos/hawaii2017/C-0683.thumb.jpg	Leaf litter
NA	NA	C-0683	S-05366	Yes	Few (4-10)	22.123311	-159.65635	Kauai	Wild forest	Partially Obstructed	no	NA	NA	NA	17.6	56	51.7	23.6	1154.406504	2017-08-08	12:28:00	NA	NA	https://storage.googleapis.com/elegansvariation.org/photos/hawaii2017/C-0683.thumb.jpg	Leaf litter
NA	NA	C-0683	S-05367	Yes	Few (4-10)	22.123311	-159.65635	Kauai	Wild forest	Partially Obstructed	no	NA	NA	NA	17.6	56	51.7	23.6	1154.406504	2017-08-08	12:28:00	NA	NA	https://storage.googleapis.com/elegansvariation.org/photos/hawaii2017/C-0683.thumb.jpg	Leaf litter
NA	NA	C-0683	S-05368	Yes	Few (4-10)	22.123311	-159.65635	Kauai	Wild forest	Partially Obstructed	no	NA	NA	NA	17.6	56	51.7	23.6	1154.406504	2017-08-08	12:28:00	NA	NA	https://storage.googleapis.com/elegansvariation.org/photos/hawaii2017/C-0683.thumb.jpg	Leaf litter
NA	NA	C-0683	S-05369	Yes	Few (4-10)	22.123311	-159.65635	Kauai	Wild forest	Partially Obstructed	no	NA	NA	NA	17.6	56	51.7	23.6	1154.406504	2017-08-08	12:28:00	NA	NA	https://storage.googleapis.com/elegansvariation.org/photos/hawaii2017/C-0683.thumb.jpg	Leaf litter
NA	NA	C-0684	NA	No	NA	22.123967	-159.655489	Kauai	Wild forest	Partially Obstructed	no	NA	NA	NA	25.2	NA	56.5	23.6	1149.6875	2017-08-08	12:24:00	NA	NA	https://storage.googleapis.com/elegansvariation.org/photos/hawaii2017/C-0684.thumb.jpg	Fruit
NA	NA	C-0685	NA	Tracks	NA	22.1244	-159.654592	Kauai	Wild forest	Partially Obstructed	no	NA	NA	NA	20.8	38	53.1	24.9	1137.766667	2017-08-08	12:18:00	NA	NA	https://storage.googleapis.com/elegansvariation.org/photos/hawaii2017/C-0685.thumb.jpg	Leaf litter
NA	NA	C-0686	S-05505	Yes	Very Few (1-3)	22.124711	-159.65171900000001	Kauai	Wild forest	Obstructed	no	NA	NA	NA	19.5	56.5	53.3	26.3	1107.290698	2017-08-08	12:11:00	NA	NA	https://storage.googleapis.com/elegansvariation.org/photos/hawaii2017/C-0686.thumb.jpg	Leaf litter
NA	NA	C-0687	NA	No	NA	22.131508	-159.660297	Kauai	Wild forest	Partially Obstructed	no	NA	NA	NA	16.8	52.5	77.5	18.8	1156.230576	2017-08-08	08:50:00	NA	NA	https://storage.googleapis.com/elegansvariation.org/photos/hawaii2017/C-0687.thumb.jpg	Leaf litter
NA	NA	C-0688	S-05464	Yes	Few (4-10)	22.132892	-159.660508	Kauai	Wild forest	Partially Obstructed	no	NA	NA	NA	16.9	NA	82.9	18.1	1113.524038	2017-08-08	09:18:00	0	Unknown	https://storage.googleapis.com/elegansvariation.org/photos/hawaii2017/C-0688.thumb.jpg	Fruit
NA	NA	C-0688	S-05471	Yes	Few (4-10)	22.132892	-159.660508	Kauai	Wild forest	Partially Obstructed	no	NA	NA	NA	16.9	NA	82.9	18.1	1113.524038	2017-08-08	09:18:00	NA	NA	https://storage.googleapis.com/elegansvariation.org/photos/hawaii2017/C-0688.thumb.jpg	Fruit
NA	NA	C-0688	S-05472	Yes	Few (4-10)	22.132892	-159.660508	Kauai	Wild forest	Partially Obstructed	no	NA	NA	NA	16.9	NA	82.9	18.1	1113.524038	2017-08-08	09:18:00	NA	NA	https://storage.googleapis.com/elegansvariation.org/photos/hawaii2017/C-0688.thumb.jpg	Fruit
NA	NA	C-0689	NA	Tracks	NA	22.131511	-159.660439	Kauai	Wild forest	Partially Obstructed	yes	6	F	3	17.1	35	76	19.7	1158.368794	2017-08-08	08:56:00	NA	NA	https://storage.googleapis.com/elegansvariation.org/photos/hawaii2017/C-0689.thumb.jpg	Leaf litter
NA	NA	C-0690	NA	Tracks	NA	22.133697	-159.661711	Kauai	Wild forest	Obstructed	no	NA	NA	NA	17.2	55	82.9	18.8	1071.047059	2017-08-08	09:37:00	NA	NA	https://storage.googleapis.com/elegansvariation.org/photos/hawaii2017/C-0690.thumb.jpg	Leaf litter
NA	NA	C-0691	NA	Tracks	NA	22.133914	-159.661194	Kauai	Wild forest	Partially Obstructed	no	NA	NA	NA	17.1	58	82	18.8	1091.434783	2017-08-08	09:33:00	NA	NA	https://storage.googleapis.com/elegansvariation.org/photos/hawaii2017/C-0691.thumb.jpg	Leaf litter
NA	NA	C-0692	NA	No	NA	22.132619	-159.66055	Kauai	Wild forest	Partially Obstructed	no	NA	NA	NA	17.3	NA	81.1	18.8	1120.254902	2017-08-08	09:21:00	NA	NA	https://storage.googleapis.com/elegansvariation.org/photos/hawaii2017/C-0692.thumb.jpg	Fruit
NA	NA	C-0693	NA	Tracks	NA	22.131889	-159.660094	Kauai	Wild forest	Partially Obstructed	no	NA	NA	NA	17.5	53	80	18.8	1148.824742	2017-08-08	09:08:00	NA	NA	https://storage.googleapis.com/elegansvariation.org/photos/hawaii2017/C-0693.thumb.jpg	Leaf litter
NA	NA	C-0694	S-05385	Yes	Very Few (1-3)	22.130572	-159.660056	Kauai	Wild forest	Partially Obstructed	no	NA	NA	NA	17.1	53	74.6	19.5	1135.4608700000001	2017-08-08	08:44:00	0	Unknown	https://storage.googleapis.com/elegansvariation.org/photos/hawaii2017/C-0694.thumb.jpg	Leaf litter
NA	NA	C-0694	S-05386	Yes	Very Few (1-3)	22.130572	-159.660056	Kauai	Wild forest	Partially Obstructed	no	NA	NA	NA	17.1	53	74.6	19.5	1135.4608700000001	2017-08-08	08:44:00	0	Unknown	https://storage.googleapis.com/elegansvariation.org/photos/hawaii2017/C-0694.thumb.jpg	Leaf litter
NA	NA	C-0695	S-05513	Yes	Few (4-10)	22.131219	-159.660297	Kauai	Wild forest	Partially Obstructed	no	NA	NA	NA	17.2	58.5	76.6	18.8	1152.46	2017-08-08	08:47:00	NA	NA	https://storage.googleapis.com/elegansvariation.org/photos/hawaii2017/C-0695.thumb.jpg	Leaf litter
NA	NA	C-0695	S-05525	Yes	Few (4-10)	22.131219	-159.660297	Kauai	Wild forest	Partially Obstructed	no	NA	NA	NA	17.2	58.5	76.6	18.8	1152.46	2017-08-08	08:47:00	NA	NA	https://storage.googleapis.com/elegansvariation.org/photos/hawaii2017/C-0695.thumb.jpg	Leaf litter
NA	NA	C-0696	S-05187	Yes	Few (4-10)	22.071294	-159.417508	Kauai	Wild forest	Partially Obstructed	yes	7	C	3	24.5	67.5	72.7	28.8	158.13	2017-08-09	10:52:00	0	Unknown	https://storage.googleapis.com/elegansvariation.org/photos/hawaii2017/C-0696.thumb.jpg	Leaf litter
NA	NA	C-0696	S-05188	Yes	Few (4-10)	22.071294	-159.417508	Kauai	Wild forest	Partially Obstructed	yes	7	C	3	24.5	67.5	72.7	28.8	158.13	2017-08-09	10:52:00	NA	NA	https://storage.googleapis.com/elegansvariation.org/photos/hawaii2017/C-0696.thumb.jpg	Leaf litter
NA	NA	C-0696	S-05189	Yes	Few (4-10)	22.071294	-159.417508	Kauai	Wild forest	Partially Obstructed	yes	7	C	3	24.5	67.5	72.7	28.8	158.13	2017-08-09	10:52:00	0	Unknown	https://storage.googleapis.com/elegansvariation.org/photos/hawaii2017/C-0696.thumb.jpg	Leaf litter
NA	NA	C-0697	S-05612	Yes	Very Few (1-3)	22.0713	-159.417514	Kauai	Wild forest	Partially Obstructed	yes	7	C	2	24.6	69	69.6	28.1	160.0215827	2017-08-09	10:52:00	1	Oscheius sp.	https://storage.googleapis.com/elegansvariation.org/photos/hawaii2017/C-0697.thumb.jpg	Leaf litter
NA	NA	C-0698	S-05644	Yes	Very Few (1-3)	22.071367	-159.417506	Kauai	Wild forest	Partially Obstructed	yes	7	C	1	24.1	68	72	27.4	157.8187135	2017-08-09	10:53:00	0	Unknown	https://storage.googleapis.com/elegansvariation.org/photos/hawaii2017/C-0698.thumb.jpg	Leaf litter
NA	NA	C-0698	S-05645	Yes	Very Few (1-3)	22.071367	-159.417506	Kauai	Wild forest	Partially Obstructed	yes	7	C	1	24.1	68	72	27.4	157.8187135	2017-08-09	10:53:00	NA	NA	https://storage.googleapis.com/elegansvariation.org/photos/hawaii2017/C-0698.thumb.jpg	Leaf litter
NA	NA	C-0699	S-05624	Yes	Very Few (1-3)	22.071358	-159.41745	Kauai	Wild forest	Partially Obstructed	yes	7	D	3	24.8	65.5	73	27.4	154.6869301	2017-08-09	10:55:00	NA	NA	https://storage.googleapis.com/elegansvariation.org/photos/hawaii2017/C-0699.thumb.jpg	Leaf litter
NA	NA	C-0699	S-05625	Yes	Very Few (1-3)	22.071358	-159.41745	Kauai	Wild forest	Partially Obstructed	yes	7	D	3	24.8	65.5	73	27.4	154.6869301	2017-08-09	10:55:00	NA	NA	https://storage.googleapis.com/elegansvariation.org/photos/hawaii2017/C-0699.thumb.jpg	Leaf litter
NA	NA	C-0700	NA	Tracks	NA	22.071342	-159.417442	Kauai	Wild forest	Partially Obstructed	yes	7	D	2	26.4	67.5	72.6	26.7	153.4562738	2017-08-09	10:56:00	NA	NA	https://storage.googleapis.com/elegansvariation.org/photos/hawaii2017/C-0700.thumb.jpg	Leaf litter
NA	NA	C-0701	NA	Tracks	NA	22.071322	-159.417475	Kauai	Wild forest	Partially Obstructed	yes	7	D	1	24	67.5	72.3	27.4	155.3727273	2017-08-09	10:57:00	NA	NA	https://storage.googleapis.com/elegansvariation.org/photos/hawaii2017/C-0701.thumb.jpg	Leaf litter
NA	NA	C-0702	NA	No	NA	22.07134528	-159.4175235	Kauai	Wild forest	Partially Obstructed	yes	7	F	3	28	64.5	74.7	27.4	171	2017-08-09	11:01:00	NA	NA	https://storage.googleapis.com/elegansvariation.org/photos/hawaii2017/C-0702.thumb.jpg	Flower
NA	NA	C-0703	S-05601	Yes	Very Few (1-3)	22.071339	-159.417489	Kauai	Wild forest	Partially Obstructed	yes	7	E	1	24.5	66	74.5	26.7	160.5887324	2017-08-09	11:00:00	NA	NA	https://storage.googleapis.com/elegansvariation.org/photos/hawaii2017/C-0703.thumb.jpg	Leaf litter
NA	NA	C-0704	S-05237	Yes	Few (4-10)	22.07135	-159.417514	Kauai	Wild forest	Partially Obstructed	yes	7	E	2	24.8	60	71	27.4	157.199262	2017-08-09	10:59:00	NA	NA	https://storage.googleapis.com/elegansvariation.org/photos/hawaii2017/C-0704.thumb.jpg	Leaf litter
NA	NA	C-0704	S-05239	Yes	Few (4-10)	22.07135	-159.417514	Kauai	Wild forest	Partially Obstructed	yes	7	E	2	24.8	60	71	27.4	157.199262	2017-08-09	10:59:00	NA	NA	https://storage.googleapis.com/elegansvariation.org/photos/hawaii2017/C-0704.thumb.jpg	Leaf litter
NA	NA	C-0705	S-05589	Yes	Few (4-10)	22.071314	-159.417575	Kauai	Wild forest	Partially Obstructed	yes	7	E	3	25.5	41	71.1	27.4	157.171123	2017-08-09	10:58:00	NA	NA	https://storage.googleapis.com/elegansvariation.org/photos/hawaii2017/C-0705.thumb.jpg	Flower
NA	NA	C-0705	S-05590	Yes	Few (4-10)	22.071314	-159.417575	Kauai	Wild forest	Partially Obstructed	yes	7	E	3	25.5	41	71.1	27.4	157.171123	2017-08-09	10:58:00	NA	NA	https://storage.googleapis.com/elegansvariation.org/photos/hawaii2017/C-0705.thumb.jpg	Flower
NA	NA	C-0706	S-05583	Yes	Few (4-10)	22.071339	-159.417494	Kauai	Wild forest	Partially Obstructed	yes	7	F	2	25.6	66	69.6	28.8	161.9841772	2017-08-09	11:02:00	NA	NA	https://storage.googleapis.com/elegansvariation.org/photos/hawaii2017/C-0706.thumb.jpg	Leaf litter
NA	NA	C-0706	S-05611	Yes	Few (4-10)	22.071339	-159.417494	Kauai	Wild forest	Partially Obstructed	yes	7	F	2	25.6	66	69.6	28.8	161.9841772	2017-08-09	11:02:00	NA	NA	https://storage.googleapis.com/elegansvariation.org/photos/hawaii2017/C-0706.thumb.jpg	Leaf litter
NA	NA	C-0707	S-05905	Yes	Proliferating (25+)	22.106439	-159.674375	Kauai	Wild forest	Partially Obstructed	no	NA	NA	NA	20.2	21.5	38.1	27.4	1039.114504	2017-08-10	08:27:00	0	Unknown	https://storage.googleapis.com/elegansvariation.org/photos/hawaii2017/C-0707.thumb.jpg	Leaf litter
NA	NA	C-0707	S-05909	Yes	Proliferating (25+)	22.106439	-159.674375	Kauai	Wild forest	Partially Obstructed	no	NA	NA	NA	20.2	21.5	38.1	27.4	1039.114504	2017-08-10	08:27:00	0	Unknown	https://storage.googleapis.com/elegansvariation.org/photos/hawaii2017/C-0707.thumb.jpg	Leaf litter
NA	NA	C-0708	NA	No	NA	22.131327595030427	-159.66034204987838	Kauai	Wild forest	Partially Obstructed	yes	10	A	1	17.7	56	62.2	24	1158.028409	2017-08-10	11:14:00	NA	NA	https://storage.googleapis.com/elegansvariation.org/photos/hawaii2017/C-0708.thumb.jpg	Leaf litter
NA	NA	C-0709	S-05921	Yes	Proliferating (25+)	22.118494	-159.681669	Kauai	Wild forest	Partially Obstructed	no	NA	NA	NA	18.6	24	67.4	22.6	982.2391304	2017-08-10	09:03:00	NA	NA	https://storage.googleapis.com/elegansvariation.org/photos/hawaii2017/C-0709.thumb.jpg	Leaf litter
NA	NA	C-0709	S-05928	Yes	Proliferating (25+)	22.118494	-159.681669	Kauai	Wild forest	Partially Obstructed	no	NA	NA	NA	18.6	24	67.4	22.6	982.2391304	2017-08-10	09:03:00	0	Unknown	https://storage.googleapis.com/elegansvariation.org/photos/hawaii2017/C-0709.thumb.jpg	Leaf litter
NA	NA	C-0710	NA	No	NA	22.118	-159.680144	Kauai	Wild forest	Partially Obstructed	no	NA	NA	NA	18.6	58	64.7	24.7	994.3026316	2017-08-10	08:50:00	NA	NA	https://storage.googleapis.com/elegansvariation.org/photos/hawaii2017/C-0710.thumb.jpg	Leaf litter
NA	NA	C-0711	S-05690	Yes	Proliferating (25+)	22.117683	-159.678925	Kauai	Wild forest	Partially Obstructed	no	NA	NA	NA	18.8	44	69.1	22.6	987.8315789	2017-08-10	08:49:00	0	Unknown	https://storage.googleapis.com/elegansvariation.org/photos/hawaii2017/C-0711.thumb.jpg	Leaf litter
NA	NA	C-0711	S-05694	Yes	Proliferating (25+)	22.117683	-159.678925	Kauai	Wild forest	Partially Obstructed	no	NA	NA	NA	18.8	44	69.1	22.6	987.8315789	2017-08-10	08:49:00	NA	NA	https://storage.googleapis.com/elegansvariation.org/photos/hawaii2017/C-0711.thumb.jpg	Leaf litter
NA	NA	C-0711	S-05719	Yes	Proliferating (25+)	22.117683	-159.678925	Kauai	Wild forest	Partially Obstructed	no	NA	NA	NA	18.8	44	69.1	22.6	987.8315789	2017-08-10	08:49:00	0	Unknown	https://storage.googleapis.com/elegansvariation.org/photos/hawaii2017/C-0711.thumb.jpg	Leaf litter
NA	NA	C-0712	S-05689	Yes	Proliferating (25+)	22.114742	-159.674861	Kauai	Wild forest	Partially Obstructed	no	NA	NA	NA	19	23	65.6	24	1034.075472	2017-08-10	08:46:00	0	Unknown	https://storage.googleapis.com/elegansvariation.org/photos/hawaii2017/C-0712.thumb.jpg	Leaf litter
NA	NA	C-0712	S-05693	Yes	Proliferating (25+)	22.114742	-159.674861	Kauai	Wild forest	Partially Obstructed	no	NA	NA	NA	19	23	65.6	24	1034.075472	2017-08-10	08:46:00	0	Unknown	https://storage.googleapis.com/elegansvariation.org/photos/hawaii2017/C-0712.thumb.jpg	Leaf litter
NA	NA	C-0712	S-05697	Yes	Proliferating (25+)	22.114742	-159.674861	Kauai	Wild forest	Partially Obstructed	no	NA	NA	NA	19	23	65.6	24	1034.075472	2017-08-10	08:46:00	0	Unknown	https://storage.googleapis.com/elegansvariation.org/photos/hawaii2017/C-0712.thumb.jpg	Leaf litter
NA	NA	C-0713	S-05952	Yes	Proliferating (25+)	22.110806	-159.672764	Kauai	Wild forest	Partially Obstructed	no	NA	NA	NA	17.8	42.5	57.7	25.3	1069.798561	2017-08-10	08:42:00	0	Unknown	https://storage.googleapis.com/elegansvariation.org/photos/hawaii2017/C-0713.thumb.jpg	Leaf litter
NA	NA	C-0713	S-05953	Yes	Proliferating (25+)	22.110806	-159.672764	Kauai	Wild forest	Partially Obstructed	no	NA	NA	NA	17.8	42.5	57.7	25.3	1069.798561	2017-08-10	08:42:00	NA	NA	https://storage.googleapis.com/elegansvariation.org/photos/hawaii2017/C-0713.thumb.jpg	Leaf litter
NA	NA	C-0714	NA	No	NA	22.110753	-159.672739	Kauai	Wild forest	Partially Obstructed	no	NA	NA	NA	19.2	32.5	56.4	25.3	1067.673077	2017-08-10	08:39:00	NA	NA	https://storage.googleapis.com/elegansvariation.org/photos/hawaii2017/C-0714.thumb.jpg	Leaf litter
NA	NA	C-0715	S-05702	Yes	Proliferating (25+)	22.109094	-159.672139	Kauai	Wild forest	Partially Obstructed	no	NA	NA	NA	18	40.5	65.3	23.3	1065.700935	2017-08-10	08:36:00	0	Unknown	https://storage.googleapis.com/elegansvariation.org/photos/hawaii2017/C-0715.thumb.jpg	Leaf litter
NA	NA	C-0715	S-05706	Yes	Proliferating (25+)	22.109094	-159.672139	Kauai	Wild forest	Partially Obstructed	no	NA	NA	NA	18	40.5	65.3	23.3	1065.700935	2017-08-10	08:36:00	0	Unknown	https://storage.googleapis.com/elegansvariation.org/photos/hawaii2017/C-0715.thumb.jpg	Leaf litter
NA	NA	C-0715	S-05710	Yes	Proliferating (25+)	22.109094	-159.672139	Kauai	Wild forest	Partially Obstructed	no	NA	NA	NA	18	40.5	65.3	23.3	1065.700935	2017-08-10	08:36:00	0	Unknown	https://storage.googleapis.com/elegansvariation.org/photos/hawaii2017/C-0715.thumb.jpg	Leaf litter
NA	NA	C-0716	NA	No	NA	22.108214	-159.672825	Kauai	Wild forest	Partially Obstructed	no	NA	NA	NA	18.6	30	54.6	25.3	1053.490566	2017-08-10	08:33:00	NA	NA	https://storage.googleapis.com/elegansvariation.org/photos/hawaii2017/C-0716.thumb.jpg	Leaf litter
NA	NA	C-0717	NA	No	NA	22.034486	-159.37909200000001	Kauai	Wild forest	Partially Obstructed	no	NA	NA	NA	9.055555555555554	56.5	55.2	32.2	88.00143678	2017-08-09	13:41:00	NA	NA	https://storage.googleapis.com/elegansvariation.org/photos/hawaii2017/C-0717.thumb.jpg	Flower
NA	NA	C-0718	NA	Tracks	NA	22.069681	-159.413875	Kauai	Wild forest	Partially Obstructed	no	NA	NA	NA	24.5	51	68.5	28.3	198.7880795	2017-08-09	11:28:00	NA	NA	https://storage.googleapis.com/elegansvariation.org/photos/hawaii2017/C-0718.thumb.jpg	Leaf litter
NA	NA	C-0719	NA	No	NA	22.070156	-159.414567	Kauai	Wild forest	Partially Obstructed	no	NA	NA	NA	25.9	63.5	46.1	28.8	211.9756944	2017-08-09	11:12:00	NA	NA	https://storage.googleapis.com/elegansvariation.org/photos/hawaii2017/C-0719.thumb.jpg	Flower
NA	NA	C-0720	S-05192	Yes	Very Few (1-3)	22.071319	-159.417392	Kauai	Wild forest	Partially Obstructed	yes	7	F	1	25.3	64.5	73.2	28.8	158.7266187	2017-08-09	11:04:00	NA	NA	https://storage.googleapis.com/elegansvariation.org/photos/hawaii2017/C-0720.thumb.jpg	Leaf litter
NA	NA	C-0720	S-05223	Yes	Very Few (1-3)	22.071319	-159.417392	Kauai	Wild forest	Partially Obstructed	yes	7	F	1	25.3	64.5	73.2	28.8	158.7266187	2017-08-09	11:04:00	NA	NA	https://storage.googleapis.com/elegansvariation.org/photos/hawaii2017/C-0720.thumb.jpg	Leaf litter
NA	NA	C-0721	S-05370	Yes	Very Few (1-3)	22.071153	-159.662497	Kauai	Wild forest	Obstructed	no	NA	NA	NA	18	24.5	64.5	21.944444444444446	1032.180328	2017-08-08	08:18:00	0	Unknown	https://storage.googleapis.com/elegansvariation.org/photos/hawaii2017/C-0721.thumb.jpg	Leaf litter
NA	NA	C-0721	S-05375	Yes	Very Few (1-3)	22.071153	-159.662497	Kauai	Wild forest	Obstructed	no	NA	NA	NA	18	24.5	64.5	21.944444444444446	1032.180328	2017-08-08	08:18:00	0	Unknown	https://storage.googleapis.com/elegansvariation.org/photos/hawaii2017/C-0721.thumb.jpg	Leaf litter
NA	NA	C-0721	S-05376	Yes	Very Few (1-3)	22.071153	-159.662497	Kauai	Wild forest	Obstructed	no	NA	NA	NA	18	24.5	64.5	21.944444444444446	1032.180328	2017-08-08	08:18:00	0	Unknown	https://storage.googleapis.com/elegansvariation.org/photos/hawaii2017/C-0721.thumb.jpg	Leaf litter
NA	NA	C-0722	NA	No	NA	22.129594	-159.660131	Kauai	Wild forest	Partially Obstructed	no	NA	NA	NA	16.4	66	70.6	20.555555555555557	1134.425926	2017-08-08	08:36:00	NA	NA	https://storage.googleapis.com/elegansvariation.org/photos/hawaii2017/C-0722.thumb.jpg	Leaf litter
NA	NA	C-0723	NA	Tracks	NA	22.131089	-159.660239	Kauai	Wild forest	Partially Obstructed	no	NA	NA	NA	16.2	68.5	77.4	19.166666666666668	1162.13369	2017-08-08	08:47:00	NA	NA	https://storage.googleapis.com/elegansvariation.org/photos/hawaii2017/C-0723.thumb.jpg	Leaf litter
NA	NA	C-0724	NA	Tracks	NA	22.039261	-159.664794	Kauai	Wild forest	Partially Obstructed	no	NA	NA	NA	19.1	20	64	21.944444444444446	792.4497041	2017-08-08	08:09:00	NA	NA	https://storage.googleapis.com/elegansvariation.org/photos/hawaii2017/C-0724.thumb.jpg	Vegetation
NA	NA	C-0725	S-05516	Yes	Some (11-25)	22.026014	-159.672744	Kauai	Wild grassland	Partially Obstructed	no	NA	NA	NA	19.5	54	60.8	26.05555555555556	630.3574468	2017-08-08	07:57:00	0	Unknown	https://storage.googleapis.com/elegansvariation.org/photos/hawaii2017/C-0725.thumb.jpg	Vegetation
NA	NA	C-0725	S-05526	Yes	Some (11-25)	22.026014	-159.672744	Kauai	Wild grassland	Partially Obstructed	no	NA	NA	NA	19.5	54	60.8	26.05555555555556	630.3574468	2017-08-08	07:57:00	0	Unknown	https://storage.googleapis.com/elegansvariation.org/photos/hawaii2017/C-0725.thumb.jpg	Vegetation
NA	NA	C-0725	S-05527	Yes	Some (11-25)	22.026014	-159.672744	Kauai	Wild grassland	Partially Obstructed	no	NA	NA	NA	19.5	54	60.8	26.05555555555556	630.3574468	2017-08-08	07:57:00	0	Unknown	https://storage.googleapis.com/elegansvariation.org/photos/hawaii2017/C-0725.thumb.jpg	Vegetation
NA	NA	C-0725	S-05528	Yes	Some (11-25)	22.026014	-159.672744	Kauai	Wild grassland	Partially Obstructed	no	NA	NA	NA	19.5	54	60.8	26.05555555555556	630.3574468	2017-08-08	07:57:00	0	Unknown	https://storage.googleapis.com/elegansvariation.org/photos/hawaii2017/C-0725.thumb.jpg	Vegetation
NA	NA	C-0726	NA	No	NA	22.130075	-159.660228	Kauai	Wild forest	Obstructed	no	NA	NA	NA	16.3	65.5	76.5	19.166666666666668	1143.54	2017-08-08	08:38:00	NA	NA	https://storage.googleapis.com/elegansvariation.org/photos/hawaii2017/C-0726.thumb.jpg	Leaf litter
NA	NA	C-0727	S-05353	Yes	Very Few (1-3)	22.131478	-159.660425	Kauai	Wild forest	Partially Obstructed	yes	6	F	1	16.4	55	78.4	19.166666666666668	1170.479452	2017-08-08	08:56:00	0	Unknown	https://storage.googleapis.com/elegansvariation.org/photos/hawaii2017/C-0727.thumb.jpg	Leaf litter
NA	NA	C-0727	S-05354	Yes	Very Few (1-3)	22.131478	-159.660425	Kauai	Wild forest	Partially Obstructed	yes	6	F	1	16.4	55	78.4	19.166666666666668	1170.479452	2017-08-08	08:56:00	NA	NA	https://storage.googleapis.com/elegansvariation.org/photos/hawaii2017/C-0727.thumb.jpg	Leaf litter
NA	NA	C-0728	NA	Tracks	NA	22.131475	-159.660453	Kauai	Wild forest	Partially Obstructed	yes	6	A	1	16.4	41	78	19.166666666666668	1170.733813	2017-08-08	08:54:00	NA	NA	https://storage.googleapis.com/elegansvariation.org/photos/hawaii2017/C-0728.thumb.jpg	Leaf litter
NA	NA	C-0729	NA	No	NA	22.13086433	-159.6599895	Kauai	Wild forest	Obstructed	no	NA	NA	NA	15.8	69	75.8	19.166666666666668	1145	2017-08-08	08:45:00	NA	NA	https://storage.googleapis.com/elegansvariation.org/photos/hawaii2017/C-0729.thumb.jpg	Leaf litter
NA	NA	C-0730	S-05374	Yes	Very Few (1-3)	22.130314	-159.660325	Kauai	Wild forest	Partially Obstructed	no	NA	NA	NA	15.3	64.5	75.9	20.555555555555557	1148.927419	2017-08-08	08:42:00	0	Unknown	https://storage.googleapis.com/elegansvariation.org/photos/hawaii2017/C-0730.thumb.jpg	Leaf litter
NA	NA	C-0731	NA	No	NA	22.131542	-159.660483	Kauai	Wild forest	Partially Obstructed	yes	6	A	2	16.4	56	77.9	19.166666666666668	1170.22314	2017-08-08	08:55:00	NA	NA	https://storage.googleapis.com/elegansvariation.org/photos/hawaii2017/C-0731.thumb.jpg	Leaf litter
NA	NA	C-0732	NA	Tracks	NA	22.129331	-159.659644	Kauai	Wild forest	Obstructed	no	NA	NA	NA	16.9	62.5	59.4	26.222222222222225	1123.183673	2017-08-08	08:33:00	NA	NA	https://storage.googleapis.com/elegansvariation.org/photos/hawaii2017/C-0732.thumb.jpg	Leaf litter
NA	NA	C-0733	NA	?	NA	22.142203	-159.652086	Kauai	Wild forest	Obstructed	no	NA	NA	NA	17.7	65.5	72.8	21.999999999999996	1238.400134	2017-08-08	10:31:00	NA	NA	https://storage.googleapis.com/elegansvariation.org/photos/hawaii2017/C-0733.thumb.jpg	Vegetation
NA	NA	C-0734	NA	Tracks	NA	21.138911	-156.969036	Molokai	Wild forest	Partially Obstructed	no	NA	NA	NA	21.3	67	63	22.6	706.9259259	2017-08-12	12:41:00	NA	NA	https://storage.googleapis.com/elegansvariation.org/photos/hawaii2017/C-0734.thumb.jpg	Leaf litter
NA	NA	C-0735	NA	Tracks	NA	21.138025	-156.965903	Molokai	Wild forest	Partially Obstructed	yes	20	F	2	21.3	66	71.6	24.7	766	2017-08-12	12:32:00	NA	NA	https://storage.googleapis.com/elegansvariation.org/photos/hawaii2017/C-0735.thumb.jpg	Leaf litter
ECA738	ECA734	C-0736	S-06447	Yes	Proliferating (25+)	21.13927631	-156.9740559	Molokai	Wild forest	Partially Obstructed	no	NA	NA	NA	22.4	66.5	70.6	24.7	669	2017-08-12	12:48:00	1	C. elegans	https://storage.googleapis.com/elegansvariation.org/photos/hawaii2017/C-0736.thumb.jpg	Flower
ECA738	ECA735	C-0736	S-06465	Yes	Proliferating (25+)	21.13927631	-156.9740559	Molokai	Wild forest	Partially Obstructed	no	NA	NA	NA	22.4	66.5	70.6	24.7	669	2017-08-12	12:48:00	1	C. elegans	https://storage.googleapis.com/elegansvariation.org/photos/hawaii2017/C-0736.thumb.jpg	Flower
NA	NA	C-0736	S-06466	Yes	Proliferating (25+)	21.13927631	-156.9740559	Molokai	Wild forest	Partially Obstructed	no	NA	NA	NA	22.4	66.5	70.6	24.7	669	2017-08-12	12:48:00	NA	NA	https://storage.googleapis.com/elegansvariation.org/photos/hawaii2017/C-0736.thumb.jpg	Flower
ECA738	ECA736	C-0736	S-06467	Yes	Proliferating (25+)	21.13927631	-156.9740559	Molokai	Wild forest	Partially Obstructed	no	NA	NA	NA	22.4	66.5	70.6	24.7	669	2017-08-12	12:48:00	1	C. elegans	https://storage.googleapis.com/elegansvariation.org/photos/hawaii2017/C-0736.thumb.jpg	Flower
ECA738	ECA737	C-0736	S-06471	Yes	Proliferating (25+)	21.13927631	-156.9740559	Molokai	Wild forest	Partially Obstructed	no	NA	NA	NA	22.4	66.5	70.6	24.7	669	2017-08-12	12:48:00	1	C. elegans	https://storage.googleapis.com/elegansvariation.org/photos/hawaii2017/C-0736.thumb.jpg	Flower
ECA738	ECA738	C-0736	S-06472	Yes	Proliferating (25+)	21.13927631	-156.9740559	Molokai	Wild forest	Partially Obstructed	no	NA	NA	NA	22.4	66.5	70.6	24.7	669	2017-08-12	12:48:00	1	C. elegans	https://storage.googleapis.com/elegansvariation.org/photos/hawaii2017/C-0736.thumb.jpg	Flower
NA	NA	C-0737	NA	No	NA	22.13008264	-159.6577078	Kauai	Wild grassland	Partially Obstructed	no	NA	NA	NA	25.3	13.5	60.4	24.7	1118	2017-08-08	15:14:00	NA	NA	https://storage.googleapis.com/elegansvariation.org/photos/hawaii2017/C-0737.thumb.jpg	Flower
NA	NA	C-0738	NA	No	NA	22.133928	-159.661331	Kauai	Wild forest	Partially Obstructed	no	NA	NA	NA	20.2	68.5	58	24	1086.615854	2017-08-10	12:01:00	NA	NA	https://storage.googleapis.com/elegansvariation.org/photos/hawaii2017/C-0738.thumb.jpg	Fungus
NA	NA	C-0739	S-07465	Yes	Very Few (1-3)	22.086706	-159.337906	Kauai	Wild forest	Partially Obstructed	no	NA	NA	NA	26.9	48	67.8	28	68.44481605	2017-08-09	15:11:00	0	Unknown	https://storage.googleapis.com/elegansvariation.org/photos/hawaii2017/C-0739.thumb.jpg	Leaf litter
NA	NA	C-0740	NA	Tracks	NA	22.136664	-159.643672	Kauai	Wild forest	Partially Obstructed	no	NA	NA	NA	20.8	59.5	63.1	24.7	1156.606061	2017-08-08	14:13:00	NA	NA	https://storage.googleapis.com/elegansvariation.org/photos/hawaii2017/C-0740.thumb.jpg	Fruit
NA	NA	C-0741	NA	No	NA	20.748408	-156.456639	Maui	Urban garden	Partially Obstructed	no	NA	NA	NA	25	28	66.6	26	3.435462842	2017-08-16	21:04:00	NA	NA	https://storage.googleapis.com/elegansvariation.org/photos/hawaii2017/C-0741.thumb.jpg	Flower
NA	NA	C-0742	S-05256	Yes	Very Few (1-3)	22.15699653	-159.6239042	Kauai	Wild forest	Partially Obstructed	no	NA	NA	NA	21.7	57	65.9	24	1154.3805265	2017-08-08	13:55:00	NA	NA	https://storage.googleapis.com/elegansvariation.org/photos/hawaii2017/C-0742.thumb.jpg	Vegetation
NA	NA	C-0743	S-05782	Yes	Proliferating (25+)	22.131519	-159.660483	Kauai	Wild forest	Obstructed	no	NA	NA	NA	19.8	62.5	64.5	22.6	1160.35729	2017-08-10	11:36:00	0	Unknown	https://storage.googleapis.com/elegansvariation.org/photos/hawaii2017/C-0743.thumb.jpg	Leaf litter
NA	NA	C-0743	S-05783	Yes	Proliferating (25+)	22.131519	-159.660483	Kauai	Wild forest	Obstructed	no	NA	NA	NA	19.8	62.5	64.5	22.6	1160.35729	2017-08-10	11:36:00	0	Unknown	https://storage.googleapis.com/elegansvariation.org/photos/hawaii2017/C-0743.thumb.jpg	Leaf litter
NA	NA	C-0744	NA	No	NA	22.131606	-159.660375	Kauai	Wild forest	Partially Obstructed	no	NA	NA	NA	20.1	17	63.3	23.3	1156.559633	2017-08-10	11:50:00	NA	NA	https://storage.googleapis.com/elegansvariation.org/photos/hawaii2017/C-0744.thumb.jpg	Leaf litter
NA	NA	C-0745	NA	No	NA	22.133914	-159.661314	Kauai	Wild forest	Partially Obstructed	no	NA	NA	NA	21.5	15	60.3	24.7	1088.774436	2017-08-10	11:55:00	NA	NA	https://storage.googleapis.com/elegansvariation.org/photos/hawaii2017/C-0745.thumb.jpg	Fungus
NA	NA	C-0746	NA	No	NA	22.133928	-159.661331	Kauai	Wild forest	Partially Obstructed	no	NA	NA	NA	23.9	18	64.7	24	1086.615854	2017-08-10	12:13:00	NA	NA	https://storage.googleapis.com/elegansvariation.org/photos/hawaii2017/C-0746.thumb.jpg	Fruit
NA	NA	C-0747	NA	No	NA	22.131606	-159.660375	Kauai	Wild forest	Obstructed	no	NA	NA	NA	18.5	54	63.3	24	1156.559633	2017-08-10	11:42:00	NA	NA	https://storage.googleapis.com/elegansvariation.org/photos/hawaii2017/C-0747.thumb.jpg	Invertebrate
NA	NA	C-0748	NA	No	NA	20.878897	-156.520253	Maui	Wild forest	Partially Obstructed	no	NA	NA	NA	23.6	69	79.5	23.6	399.7517241	2017-08-13	14:04:00	NA	NA	https://storage.googleapis.com/elegansvariation.org/photos/hawaii2017/C-0748.thumb.jpg	Fruit
NA	NA	C-0749	NA	No	NA	21.950061	-159.362844	Kauai	Rural garden	Obstructed	no	NA	NA	NA	28.7	10	63	29.5	14.87288136	2017-08-10	16:26:00	NA	NA	https://storage.googleapis.com/elegansvariation.org/photos/hawaii2017/C-0749.thumb.jpg	Vegetation
NA	NA	C-0750	S-06743	Yes	Very Few (1-3)	20.87057	-156.17982	Maui	Wild forest	Partially Obstructed	yes	15	A	0	23.3	66	73.2	26.3	205	2017-08-15	15:10:00	0	Unknown	https://storage.googleapis.com/elegansvariation.org/photos/hawaii2017/C-0750.thumb.jpg	Leaf litter
NA	NA	C-0751	NA	Tracks	NA	22.127217	-159.642153	Kauai	Wild forest	Partially Obstructed	no	NA	NA	NA	18.5	61	61.2	23.944444444444443	1158.491228	2017-08-08	11:30:00	NA	NA	https://storage.googleapis.com/elegansvariation.org/photos/hawaii2017/C-0751.thumb.jpg	Leaf litter
NA	NA	C-0752	NA	No	NA	22.125469	-159.650511	Kauai	Wild forest	Partially Obstructed	no	NA	NA	NA	21.1	NA	48.2	27	1082.478992	2017-08-08	11:51:00	NA	NA	https://storage.googleapis.com/elegansvariation.org/photos/hawaii2017/C-0752.thumb.jpg	Flower
NA	NA	C-0753	S-05371	Yes	Very Few (1-3)	22.12558546	-159.6497521	Kauai	Wild forest	Partially Obstructed	no	NA	NA	NA	21.5	45.5	46.8	26.3	1091	2017-08-08	12:05:00	0	Unknown	https://storage.googleapis.com/elegansvariation.org/photos/hawaii2017/C-0753.thumb.jpg	Leaf litter
NA	NA	C-0753	S-05372	Yes	Very Few (1-3)	22.12558546	-159.6497521	Kauai	Wild forest	Partially Obstructed	no	NA	NA	NA	21.5	45.5	46.8	26.3	1091	2017-08-08	12:05:00	NA	NA	https://storage.googleapis.com/elegansvariation.org/photos/hawaii2017/C-0753.thumb.jpg	Leaf litter
NA	NA	C-0754	NA	No	NA	21.177097	-157.005236	Molokai	Wild forest	Partially Obstructed	yes	18	A	0	21.7	50	73.1	24.94444444444445	488.3479319	2017-08-12	08:31:00	NA	NA	https://storage.googleapis.com/elegansvariation.org/photos/hawaii2017/C-0754.thumb.jpg	Leaf litter
NA	NA	C-0755	NA	Tracks	NA	21.177075	-157.005463	Molokai	Wild forest	Partially Obstructed	yes	18	F	3	20.9	43	89.7	21.5	498	2017-08-12	08:49:00	NA	NA	https://storage.googleapis.com/elegansvariation.org/photos/hawaii2017/C-0755.thumb.jpg	Leaf litter
NA	NA	C-0756	S-06441	Yes	Some (11-25)	21.175615	-157.008211	Molokai	Wild forest	Partially Obstructed	yes	19	A	3	21.8	64	89.6	22.6	491	2017-08-12	09:32:00	0	Unknown	https://storage.googleapis.com/elegansvariation.org/photos/hawaii2017/C-0756.thumb.jpg	Leaf litter
NA	NA	C-0756	S-06442	Yes	Some (11-25)	21.175615	-157.008211	Molokai	Wild forest	Partially Obstructed	yes	19	A	3	21.8	64	89.6	22.6	491	2017-08-12	09:32:00	0	Unknown	https://storage.googleapis.com/elegansvariation.org/photos/hawaii2017/C-0756.thumb.jpg	Leaf litter
NA	NA	C-0757	NA	Tracks	NA	21.177017	-157.005458	Molokai	Wild forest	Partially Obstructed	yes	18	D	3	22	29	86.3	22.2	498	2017-08-12	08:43:00	NA	NA	https://storage.googleapis.com/elegansvariation.org/photos/hawaii2017/C-0757.thumb.jpg	Leaf litter
NA	NA	C-0758	S-06484	Yes	Few (4-10)	21.177061	-157.005256	Molokai	Wild forest	Partially Obstructed	NA	NA	NA	NA	21.5	53	79.1	24.3	492.2280702	2017-08-12	08:54:00	0	Unknown	https://storage.googleapis.com/elegansvariation.org/photos/hawaii2017/C-0758.thumb.jpg	Leaf litter
NA	NA	C-0758	S-06485	Yes	Few (4-10)	21.177061	-157.005256	Molokai	Wild forest	Partially Obstructed	NA	NA	NA	NA	21.5	53	79.1	24.3	492.2280702	2017-08-12	08:54:00	0	Unknown	https://storage.googleapis.com/elegansvariation.org/photos/hawaii2017/C-0758.thumb.jpg	Leaf litter
NA	NA	C-0759	S-06499	Yes	Few (4-10)	21.1770063	-157.0053879	Molokai	Wild forest	Partially Obstructed	yes	18	B	3	20.4	66.5	85.9	22.2	489	2017-08-12	08:39:00	0	Unknown	https://storage.googleapis.com/elegansvariation.org/photos/hawaii2017/C-0759.thumb.jpg	Leaf litter
NA	NA	C-0759	S-06500	Yes	Few (4-10)	21.1770063	-157.0053879	Molokai	Wild forest	Partially Obstructed	yes	18	B	3	20.4	66.5	85.9	22.2	489	2017-08-12	08:39:00	0	Unknown	https://storage.googleapis.com/elegansvariation.org/photos/hawaii2017/C-0759.thumb.jpg	Leaf litter
NA	NA	C-0760	S-06474	Yes	Some (11-25)	21.177024	-157.005394	Molokai	Wild forest	Partially Obstructed	yes	18	C	3	21.1	32.5	87.3	22.2	489	2017-08-12	08:41:00	NA	NA	https://storage.googleapis.com/elegansvariation.org/photos/hawaii2017/C-0760.thumb.jpg	Leaf litter
NA	NA	C-0761	NA	No	NA	21.176421	-157.005053	Molokai	Wild forest	Partially Obstructed	no	NA	NA	NA	22.1	57.5	84.8	22.2	489	2017-08-12	09:00:00	NA	NA	https://storage.googleapis.com/elegansvariation.org/photos/hawaii2017/C-0761.thumb.jpg	Fungus
NA	NA	C-0762	S-05646	Yes	Few (4-10)	21.177108	-157.005667	Molokai	Wild forest	Partially Obstructed	yes	18	C	2	20.9	67	87.3	22.2	502.1644737	2017-08-12	08:41:00	0	Unknown	https://storage.googleapis.com/elegansvariation.org/photos/hawaii2017/C-0762.thumb.jpg	Leaf litter
NA	NA	C-0762	S-05652	Yes	Few (4-10)	21.177108	-157.005667	Molokai	Wild forest	Partially Obstructed	yes	18	C	2	20.9	67	87.3	22.2	502.1644737	2017-08-12	08:41:00	0	Unknown	https://storage.googleapis.com/elegansvariation.org/photos/hawaii2017/C-0762.thumb.jpg	Leaf litter
NA	NA	C-0763	NA	No	NA	21.176005	-157.004993	Molokai	Wild forest	Obstructed	no	NA	NA	NA	22.5	56	90.1	22.9	510	2017-08-12	09:07:00	NA	NA	https://storage.googleapis.com/elegansvariation.org/photos/hawaii2017/C-0763.thumb.jpg	Fungus
NA	NA	C-0764	S-06478	Yes	Very Few (1-3)	21.177017	-157.005458	Molokai	Wild forest	Partially Obstructed	yes	18	E	3	21.5	62	86.3	21.5	498	2017-08-12	08:47:00	0	Unknown	https://storage.googleapis.com/elegansvariation.org/photos/hawaii2017/C-0764.thumb.jpg	Leaf litter
NA	NA	C-0765	S-06489	Yes	Some (11-25)	21.1764271	-157.0050015	Molokai	Wild forest	Obstructed	no	NA	NA	NA	22	64	87.3	21.5	489	2017-08-12	09:01:00	NA	NA	https://storage.googleapis.com/elegansvariation.org/photos/hawaii2017/C-0765.thumb.jpg	Fungus
NA	NA	C-0765	S-06490	Yes	Some (11-25)	21.1764271	-157.0050015	Molokai	Wild forest	Obstructed	no	NA	NA	NA	22	64	87.3	21.5	489	2017-08-12	09:01:00	NA	NA	https://storage.googleapis.com/elegansvariation.org/photos/hawaii2017/C-0765.thumb.jpg	Fungus
NA	NA	C-0766	NA	No	NA	21.177119	-157.005419	Molokai	Wild forest	Partially Obstructed	yes	18	D	2	21.9	64	86.3	22.2	502.0717949	2017-08-12	08:43:00	NA	NA	https://storage.googleapis.com/elegansvariation.org/photos/hawaii2017/C-0766.thumb.jpg	Invertebrate
NA	NA	C-0767	NA	No	NA	21.175352	-157.005953	Molokai	Wild forest	Partially Obstructed	no	NA	NA	NA	22.4	60	92.6	21.9	520	2017-08-12	09:18:00	NA	NA	https://storage.googleapis.com/elegansvariation.org/photos/hawaii2017/C-0767.thumb.jpg	Fruit
NA	NA	C-0768	NA	Tracks	NA	21.177006	-157.005388	Molokai	Wild forest	Partially Obstructed	yes	18	A	3	21.7	60.5	73.6	23.3	489	2017-08-12	08:36:00	NA	NA	https://storage.googleapis.com/elegansvariation.org/photos/hawaii2017/C-0768.thumb.jpg	Leaf litter
NA	NA	C-0769	S-06452	Yes	Very Few (1-3)	21.176117	-157.004952	Molokai	Wild forest	Partially Obstructed	no	NA	NA	NA	22.6	58.5	88.3	22.2	510	2017-08-12	09:04:00	NA	NA	https://storage.googleapis.com/elegansvariation.org/photos/hawaii2017/C-0769.thumb.jpg	Leaf litter
NA	NA	C-0770	S-06481	Yes	Few (4-10)	21.177047	-157.005414	Molokai	Wild forest	Partially Obstructed	yes	18	E	2	21.7	60.5	86.3	21.5	490.8519313	2017-08-12	08:47:00	NA	NA	https://storage.googleapis.com/elegansvariation.org/photos/hawaii2017/C-0770.thumb.jpg	Leaf litter
NA	NA	C-0770	S-06488	Yes	Few (4-10)	21.177047	-157.005414	Molokai	Wild forest	Partially Obstructed	yes	18	E	2	21.7	60.5	86.3	21.5	490.8519313	2017-08-12	08:47:00	0	Unknown	https://storage.googleapis.com/elegansvariation.org/photos/hawaii2017/C-0770.thumb.jpg	Leaf litter
NA	NA	C-0771	S-06451	Yes	Very Few (1-3)	21.175636	-157.008215	Molokai	Wild forest	Partially Obstructed	yes	19	C	2	21.1	64.5	89.4	22.6	491	2017-08-12	09:37:00	0	Unknown	https://storage.googleapis.com/elegansvariation.org/photos/hawaii2017/C-0771.thumb.jpg	Leaf litter
NA	NA	C-0772	S-06469	Yes	Few (4-10)	21.151286	-156.998814	Molokai	Wild forest	Partially Obstructed	yes	18	A	2	21.6	65.5	79.6	23.3	530.6057692	2017-08-12	08:36:00	0	Unknown	https://storage.googleapis.com/elegansvariation.org/photos/hawaii2017/C-0772.thumb.jpg	Leaf litter
NA	NA	C-0772	S-06473	Yes	Few (4-10)	21.151286	-156.998814	Molokai	Wild forest	Partially Obstructed	yes	18	A	2	21.6	65.5	79.6	23.3	530.6057692	2017-08-12	08:36:00	0	Unknown	https://storage.googleapis.com/elegansvariation.org/photos/hawaii2017/C-0772.thumb.jpg	Leaf litter
NA	NA	C-0773	NA	Tracks	NA	21.175617	-157.005392	Molokai	Wild forest	Partially Obstructed	no	NA	NA	NA	22.5	36	86.7	22.6	509.1833333	2017-08-12	09:14:00	NA	NA	https://storage.googleapis.com/elegansvariation.org/photos/hawaii2017/C-0773.thumb.jpg	Fungus
NA	NA	C-0774	S-06475	Yes	Some (11-25)	21.176817	-157.005086	Molokai	Wild forest	Partially Obstructed	no	NA	NA	NA	23	18	82.4	22.9	508.1878173	2017-08-12	08:57:00	NA	NA	https://storage.googleapis.com/elegansvariation.org/photos/hawaii2017/C-0774.thumb.jpg	Fruit
NA	NA	C-0775	S-06464	Yes	Very Few (1-3)	21.175608	-157.008133	Molokai	Wild forest	Partially Obstructed	yes	19	D	2	21.2	62.8	89.2	22.6	491	2017-08-12	09:40:00	0	Unknown	https://storage.googleapis.com/elegansvariation.org/photos/hawaii2017/C-0775.thumb.jpg	Fruit
NA	NA	C-0776	S-05566	Yes	Very Few (1-3)	22.081653	-159.425986	Kauai	Wild forest	Partially Obstructed	yes	8	D	3	22.4	64	78.7	24.9	277.3657143	2017-08-09	11:30:00	1	C. briggsae	https://storage.googleapis.com/elegansvariation.org/photos/hawaii2017/C-0776.thumb.jpg	Leaf litter
NA	NA	C-0777	NA	No	NA	21.176969	-157.00555	Molokai	Wild forest	Obstructed	yes	18	F	2	21	49	89.7	21.5	508.0806452	2017-08-12	08:49:00	NA	NA	https://storage.googleapis.com/elegansvariation.org/photos/hawaii2017/C-0777.thumb.jpg	Leaf litter
NA	NA	C-0778	S-05649	Yes	Few (4-10)	21.177161	-157.005272	Molokai	Wild forest	Partially Obstructed	yes	18	B	2	20.7	66.5	85.9	22.2	536.7486034	2017-08-12	08:39:00	NA	NA	https://storage.googleapis.com/elegansvariation.org/photos/hawaii2017/C-0778.thumb.jpg	Leaf litter
NA	NA	C-0778	S-06463	Yes	Few (4-10)	21.177161	-157.005272	Molokai	Wild forest	Partially Obstructed	yes	18	B	2	20.7	66.5	85.9	22.2	536.7486034	2017-08-12	08:39:00	NA	NA	https://storage.googleapis.com/elegansvariation.org/photos/hawaii2017/C-0778.thumb.jpg	Leaf litter
NA	NA	C-0779	S-06449	Yes	Very Few (1-3)	21.175639	-157.008233	Molokai	Wild forest	Partially Obstructed	yes	19	B	2	21.7	52	92.6	21.9	491	2017-08-12	09:35:00	0	Unknown	https://storage.googleapis.com/elegansvariation.org/photos/hawaii2017/C-0779.thumb.jpg	Leaf litter
NA	NA	C-0780	S-05619	Yes	Very Few (1-3)	22.102964	-159.388328	Kauai	Wild forest	Partially Obstructed	no	NA	NA	NA	23.8	65	85.2	26.7	173.182266	2017-08-09	13:46:00	0	Unknown	https://storage.googleapis.com/elegansvariation.org/photos/hawaii2017/C-0780.thumb.jpg	Leaf litter
NA	NA	C-0781	S-05631	Yes	Some (11-25)	22.081617	-159.425939	Kauai	Wild forest	Partially Obstructed	yes	8	E	3	21.6	61.5	77.1	24.9	272.6848485	2017-08-09	11:29:00	1	C. briggsae	https://storage.googleapis.com/elegansvariation.org/photos/hawaii2017/C-0781.thumb.jpg	Leaf litter
NA	NA	C-0781	S-05632	Yes	Some (11-25)	22.081617	-159.425939	Kauai	Wild forest	Partially Obstructed	yes	8	E	3	21.6	61.5	77.1	24.9	272.6848485	2017-08-09	11:29:00	1	C. briggsae	https://storage.googleapis.com/elegansvariation.org/photos/hawaii2017/C-0781.thumb.jpg	Leaf litter
NA	NA	C-0782	S-05609	Yes	Some (11-25)	22.081678	-159.426006	Kauai	Wild forest	Partially Obstructed	yes	8	B	3	22.1	67	75.6	25.6	282.3812155	2017-08-09	11:33:00	0	Unknown	https://storage.googleapis.com/elegansvariation.org/photos/hawaii2017/C-0782.thumb.jpg	Leaf litter
NA	NA	C-0782	S-05610	Yes	Some (11-25)	22.081678	-159.426006	Kauai	Wild forest	Partially Obstructed	yes	8	B	3	22.1	67	75.6	25.6	282.3812155	2017-08-09	11:33:00	0	Unknown	https://storage.googleapis.com/elegansvariation.org/photos/hawaii2017/C-0782.thumb.jpg	Leaf litter
NA	NA	C-0783	NA	No	NA	22.081678	-159.425981	Kauai	Wild forest	Partially Obstructed	yes	8	C	3	21.2	68	77.2	25.6	280.128655	2017-08-09	11:32:00	NA	NA	https://storage.googleapis.com/elegansvariation.org/photos/hawaii2017/C-0783.thumb.jpg	Leaf litter
NA	NA	C-0784	S-05546	Yes	Very Few (1-3)	22.081611	-159.425964	Kauai	Wild forest	Partially Obstructed	yes	8	D	1	22.1	55	78.5	24.9	276.8301887	2017-08-09	11:31:00	NA	NA	https://storage.googleapis.com/elegansvariation.org/photos/hawaii2017/C-0784.thumb.jpg	Leaf litter
NA	NA	C-0785	S-05628	Yes	Very Few (1-3)	22.08160875	-159.4259925	Kauai	Wild forest	Partially Obstructed	yes	8	A	1	21.3	59.5	81.2	24.9	281	2017-08-09	11:24:00	NA	NA	https://storage.googleapis.com/elegansvariation.org/photos/hawaii2017/C-0785.thumb.jpg	Leaf litter
NA	NA	C-0786	NA	No	NA	22.078722	-159.422986	Kauai	Wild forest	Partially Obstructed	no	NA	NA	NA	22.7	NA	94.6	24.3	273.1980198	2017-08-09	08:22:00	NA	NA	https://storage.googleapis.com/elegansvariation.org/photos/hawaii2017/C-0786.thumb.jpg	Fruit
NA	NA	C-0787	S-05643	Yes	Very Few (1-3)	22.081661	-159.425983	Kauai	Wild forest	Partially Obstructed	yes	8	B	2	22.1	66	77.8	24.9	279.1784387	2017-08-09	11:34:00	0	Unknown	https://storage.googleapis.com/elegansvariation.org/photos/hawaii2017/C-0787.thumb.jpg	Leaf litter
NA	NA	C-0787	S-05648	Yes	Very Few (1-3)	22.081661	-159.425983	Kauai	Wild forest	Partially Obstructed	yes	8	B	2	22.1	66	77.8	24.9	279.1784387	2017-08-09	11:34:00	0	Unknown	https://storage.googleapis.com/elegansvariation.org/photos/hawaii2017/C-0787.thumb.jpg	Leaf litter
NA	NA	C-0788	S-05198	Yes	Some (11-25)	22.081647	-159.426003	Kauai	Wild forest	Partially Obstructed	yes	8	A	2	21.7	67	80.5	24.9	276.6506024	2017-08-09	11:26:00	0	Unknown	https://storage.googleapis.com/elegansvariation.org/photos/hawaii2017/C-0788.thumb.jpg	Leaf litter
NA	NA	C-0788	S-05199	Yes	Some (11-25)	22.081647	-159.426003	Kauai	Wild forest	Partially Obstructed	yes	8	A	2	21.7	67	80.5	24.9	276.6506024	2017-08-09	11:26:00	0	Unknown	https://storage.googleapis.com/elegansvariation.org/photos/hawaii2017/C-0788.thumb.jpg	Leaf litter
NA	NA	C-0788	S-05210	Yes	Some (11-25)	22.081647	-159.426003	Kauai	Wild forest	Partially Obstructed	yes	8	A	2	21.7	67	80.5	24.9	276.6506024	2017-08-09	11:26:00	NA	NA	https://storage.googleapis.com/elegansvariation.org/photos/hawaii2017/C-0788.thumb.jpg	Leaf litter
NA	NA	C-0789	S-07468	Yes	Very Few (1-3)	22.08825	-159.426483	Kauai	Wild forest	Partially Obstructed	no	NA	NA	NA	23.1	64	88.8	24.5	332.9986505	2017-08-09	09:19:00	1	C. briggsae	https://storage.googleapis.com/elegansvariation.org/photos/hawaii2017/C-0789.thumb.jpg	Leaf litter
NA	NA	C-0790	S-05647	Yes	Very Few (1-3)	22.092822	-159.435306	Kauai	Wild forest	Partially Obstructed	no	NA	NA	NA	22.3	58	86.1	24.9	439.6529412	2017-08-09	10:18:00	1	C. briggsae	https://storage.googleapis.com/elegansvariation.org/photos/hawaii2017/C-0790.thumb.jpg	Leaf litter
NA	NA	C-0791	S-05616	Yes	Few (4-10)	22.092892	-159.435936	Kauai	Wild forest	Partially Obstructed	no	NA	NA	NA	24.4	NA	77.1	26.3	446.4834437	2017-08-09	10:21:00	0	Unknown	https://storage.googleapis.com/elegansvariation.org/photos/hawaii2017/C-0791.thumb.jpg	Leaf litter
NA	NA	C-0791	S-05617	Yes	Few (4-10)	22.092892	-159.435936	Kauai	Wild forest	Partially Obstructed	no	NA	NA	NA	24.4	NA	77.1	26.3	446.4834437	2017-08-09	10:21:00	0	Unknown	https://storage.googleapis.com/elegansvariation.org/photos/hawaii2017/C-0791.thumb.jpg	Leaf litter
NA	NA	C-0792	S-07518	Yes	Some (11-25)	22.081633	-159.425992	Kauai	Wild forest	Partially Obstructed	yes	8	F	1	22	65	81.4	24.9	272.6217617	2017-08-09	11:27:00	NA	NA	https://storage.googleapis.com/elegansvariation.org/photos/hawaii2017/C-0792.thumb.jpg	Leaf litter
NA	NA	C-0792	S-07519	Yes	Some (11-25)	22.081633	-159.425992	Kauai	Wild forest	Partially Obstructed	yes	8	F	1	22	65	81.4	24.9	272.6217617	2017-08-09	11:27:00	0	Unknown	https://storage.googleapis.com/elegansvariation.org/photos/hawaii2017/C-0792.thumb.jpg	Leaf litter
NA	NA	C-0792	S-07520	Yes	Some (11-25)	22.081633	-159.425992	Kauai	Wild forest	Partially Obstructed	yes	8	F	1	22	65	81.4	24.9	272.6217617	2017-08-09	11:27:00	NA	NA	https://storage.googleapis.com/elegansvariation.org/photos/hawaii2017/C-0792.thumb.jpg	Leaf litter
NA	NA	C-0793	S-05634	Yes	Few (4-10)	22.093108	-159.436544	Kauai	Wild forest	Partially Obstructed	no	NA	NA	NA	24.3	66.5	77.3	26.3	444.5881783	2017-08-09	10:24:00	NA	NA	https://storage.googleapis.com/elegansvariation.org/photos/hawaii2017/C-0793.thumb.jpg	Leaf litter
NA	NA	C-0794	S-05550	Yes	Some (11-25)	22.092753	-159.434619	Kauai	Wild forest	Partially Obstructed	no	NA	NA	NA	22.4	69	82	25.6	434.2096774	2017-08-09	10:14:00	1	Oscheius sp.	https://storage.googleapis.com/elegansvariation.org/photos/hawaii2017/C-0794.thumb.jpg	Leaf litter
NA	NA	C-0794	S-05551	Yes	Some (11-25)	22.092753	-159.434619	Kauai	Wild forest	Partially Obstructed	no	NA	NA	NA	22.4	69	82	25.6	434.2096774	2017-08-09	10:14:00	1	Oscheius sp.	https://storage.googleapis.com/elegansvariation.org/photos/hawaii2017/C-0794.thumb.jpg	Leaf litter
NA	NA	C-0794	S-05552	Yes	Some (11-25)	22.092753	-159.434619	Kauai	Wild forest	Partially Obstructed	no	NA	NA	NA	22.4	69	82	25.6	434.2096774	2017-08-09	10:14:00	1	Oscheius sp.	https://storage.googleapis.com/elegansvariation.org/photos/hawaii2017/C-0794.thumb.jpg	Leaf litter
NA	NA	C-0795	NA	Tracks	NA	22.092728	-159.434636	Kauai	Wild forest	Partially Obstructed	no	NA	NA	NA	23.6	67	79.5	27	435.4401709	2017-08-09	10:12:00	NA	NA	https://storage.googleapis.com/elegansvariation.org/photos/hawaii2017/C-0795.thumb.jpg	Leaf litter
NA	NA	C-0796	S-07507	Yes	Few (4-10)	22.081611	-159.425942	Kauai	Wild forest	Partially Obstructed	yes	8	E	2	21.5	64	81	24.9	271.1724138	2017-08-09	11:30:00	0	Unknown	https://storage.googleapis.com/elegansvariation.org/photos/hawaii2017/C-0796.thumb.jpg	Leaf litter
NA	NA	C-0796	S-07508	Yes	Few (4-10)	22.081611	-159.425942	Kauai	Wild forest	Partially Obstructed	yes	8	E	2	21.5	64	81	24.9	271.1724138	2017-08-09	11:30:00	0	Unknown	https://storage.googleapis.com/elegansvariation.org/photos/hawaii2017/C-0796.thumb.jpg	Leaf litter
NA	NA	C-0797	NA	No	NA	22.092725	-159.434047	Kauai	Wild forest	Partially Obstructed	no	NA	NA	NA	22.1	NA	79	27.7	428.0062112	2017-08-09	10:09:00	NA	NA	https://storage.googleapis.com/elegansvariation.org/photos/hawaii2017/C-0797.thumb.jpg	Flower
NA	NA	C-0798	S-07509	Yes	Very Few (1-3)	22.092206	-159.431919	Kauai	Wild forest	Obstructed	no	NA	NA	NA	23.1	NA	78.5	27	412.0040161	2017-08-09	10:01:00	NA	NA	https://storage.googleapis.com/elegansvariation.org/photos/hawaii2017/C-0798.thumb.jpg	Leaf litter
NA	NA	C-0799	S-05512	Yes	Very Few (1-3)	22.092503	-159.432608	Kauai	Wild forest	Obstructed	no	NA	NA	NA	22.8	66.5	83.1	25.6	415.2389937	2017-08-09	10:03:00	1	C. briggsae	https://storage.googleapis.com/elegansvariation.org/photos/hawaii2017/C-0799.thumb.jpg	Leaf litter
NA	NA	C-0799	S-07480	Yes	Very Few (1-3)	22.092503	-159.432608	Kauai	Wild forest	Obstructed	no	NA	NA	NA	22.8	66.5	83.1	25.6	415.2389937	2017-08-09	10:03:00	1	C. briggsae	https://storage.googleapis.com/elegansvariation.org/photos/hawaii2017/C-0799.thumb.jpg	Leaf litter
NA	NA	C-0800	S-07503	Yes	Proliferating (25+)	22.090819	-159.430719	Kauai	Wild forest	Partially Obstructed	no	NA	NA	NA	23.7	67.5	83.9	25.6	387.461039	2017-08-09	09:49:00	1	C. briggsae	https://storage.googleapis.com/elegansvariation.org/photos/hawaii2017/C-0800.thumb.jpg	Leaf litter
NA	NA	C-0800	S-07510	Yes	Proliferating (25+)	22.090819	-159.430719	Kauai	Wild forest	Partially Obstructed	no	NA	NA	NA	23.7	67.5	83.9	25.6	387.461039	2017-08-09	09:49:00	1	C. briggsae	https://storage.googleapis.com/elegansvariation.org/photos/hawaii2017/C-0800.thumb.jpg	Leaf litter
NA	NA	C-0801	S-05570	Yes	Very Few (1-3)	22.091008	-159.430731	Kauai	Wild forest	Partially Obstructed	no	NA	NA	NA	23.3	NA	87.8	26.3	386.2631579	2017-08-09	09:50:00	0	Unknown	https://storage.googleapis.com/elegansvariation.org/photos/hawaii2017/C-0801.thumb.jpg	Fruit
NA	NA	C-0802	S-07482	Yes	Very Few (1-3)	22.079556	-159.423239	Kauai	Wild forest	Obstructed	no	NA	NA	NA	23.5	NA	88.3	24.3	275.9360731	2017-08-09	08:26:00	NA	NA	https://storage.googleapis.com/elegansvariation.org/photos/hawaii2017/C-0802.thumb.jpg	Fruit
NA	NA	C-0803	S-05197	Yes	Proliferating (25+)	22.071739	-159.418614	Kauai	Wild grassland	Full	no	NA	NA	NA	23.2	NA	81	24.9	181.7934272	2017-08-09	07:47:00	1	C. oiwi	https://storage.googleapis.com/elegansvariation.org/photos/hawaii2017/C-0803.thumb.jpg	Flower
NA	NA	C-0804	NA	No	NA	22.15066865001401	-159.6456000000848	Kauai	Wild forest	Partially Obstructed	no	NA	NA	NA	17.2	42.5	62.8	22.333333333333336	1255	2017-08-08	09:00:00	NA	NA	https://storage.googleapis.com/elegansvariation.org/photos/hawaii2017/C-0804.thumb.jpg	Flower
NA	NA	C-0805	NA	No	NA	22.1508447	-159.6455322	Kauai	Wild forest	Partially Obstructed	no	NA	NA	NA	18.4	44	71.5	21.999999999999996	1255	2017-08-08	09:03:00	NA	NA	https://storage.googleapis.com/elegansvariation.org/photos/hawaii2017/C-0805.thumb.jpg	Flower
NA	NA	C-0806	NA	No	NA	22.15129598	-159.6464265	Kauai	Wild forest	Partially Obstructed	no	NA	NA	NA	17.5	52	70.7	21.27777777777778	1206	2017-08-08	09:10:00	NA	NA	https://storage.googleapis.com/elegansvariation.org/photos/hawaii2017/C-0806.thumb.jpg	Flower
NA	NA	C-0807	NA	No	NA	22.151308	-159.646475	Kauai	Wild forest	Partially Obstructed	no	NA	NA	NA	17.5	47.5	70.1	21.944444444444446	1238.282609	2017-08-08	09:37:00	NA	NA	https://storage.googleapis.com/elegansvariation.org/photos/hawaii2017/C-0807.thumb.jpg	Leaf litter
NA	NA	C-0808	NA	Tracks	NA	22.150047	-159.642197	Kauai	Wild forest	Partially Obstructed	no	NA	NA	NA	17.7	57	70.7	21.27777777777778	1249.151724	2017-08-08	09:40:00	NA	NA	https://storage.googleapis.com/elegansvariation.org/photos/hawaii2017/C-0808.thumb.jpg	Leaf litter
NA	NA	C-0809	NA	No	NA	22.149061	-159.641378	Kauai	Wild forest	Partially Obstructed	yes	5	C	3	18.9	46.5	69.1	20.5	1243.56962	2017-08-08	10:02:00	NA	NA	https://storage.googleapis.com/elegansvariation.org/photos/hawaii2017/C-0809.thumb.jpg	Leaf litter
NA	NA	C-0810	S-05499	Yes	Very Few (1-3)	22.149944	-159.642053	Kauai	Wild forest	Partially Obstructed	no	NA	NA	NA	18.4	56.5	69.2	21.944444444444446	1246.537037	2017-08-08	09:45:00	NA	NA	https://storage.googleapis.com/elegansvariation.org/photos/hawaii2017/C-0810.thumb.jpg	Leaf litter
NA	NA	C-0811	NA	Tracks	NA	22.149108	-159.641369	Kauai	Wild forest	Partially Obstructed	yes	5	B	3	20.2	49	70.2	20.5	1250.666	2017-08-08	09:59:00	NA	NA	https://storage.googleapis.com/elegansvariation.org/photos/hawaii2017/C-0811.thumb.jpg	Leaf litter
NA	NA	C-0812	S-05358	Yes	Very Few (1-3)	22.149092	-159.641442	Kauai	Wild forest	Partially Obstructed	yes	5	A	3	18.3	43.5	71.1	21.2	1250.342593	2017-08-08	09:55:00	0	Unknown	https://storage.googleapis.com/elegansvariation.org/photos/hawaii2017/C-0812.thumb.jpg	Leaf litter
NA	NA	C-0813	NA	No	NA	22.15087345	-159.6427291	Kauai	Wild forest	Partially Obstructed	no	NA	NA	NA	26.8	36.5	53.2	26.7	1250	2017-08-08	11:54:00	NA	NA	https://storage.googleapis.com/elegansvariation.org/photos/hawaii2017/C-0813.thumb.jpg	Flower
NA	NA	C-0814	NA	Tracks	NA	22.147681	-159.640092	Kauai	Wild forest	Partially Obstructed	no	NA	NA	NA	20.3	48.5	66.2	22.6	1254.073529	2017-08-08	10:31:00	NA	NA	https://storage.googleapis.com/elegansvariation.org/photos/hawaii2017/C-0814.thumb.jpg	Leaf litter
NA	NA	C-0815	NA	No	NA	22.149119	-159.641389	Kauai	Wild forest	Partially Obstructed	no	NA	NA	NA	20	51	70.6	21.944444444444446	1247.957895	2017-08-08	10:17:00	NA	NA	https://storage.googleapis.com/elegansvariation.org/photos/hawaii2017/C-0815.thumb.jpg	Leaf litter
NA	NA	C-0816	NA	No	NA	22.1485596	-159.6409768	Kauai	Wild forest	Obstructed	no	NA	NA	NA	20.3	NA	68.2	21.2	1255	2017-08-08	10:19:00	NA	NA	https://storage.googleapis.com/elegansvariation.org/photos/hawaii2017/C-0816.thumb.jpg	Invertebrate
NA	NA	C-0817	S-05275	Yes	Very Few (1-3)	22.147711	-159.640044	Kauai	Wild forest	Partially Obstructed	no	NA	NA	NA	19.9	43	65	23.3	1251.247619	2017-08-08	10:27:00	0	Unknown	https://storage.googleapis.com/elegansvariation.org/photos/hawaii2017/C-0817.thumb.jpg	Leaf litter
NA	NA	C-0818	NA	No	NA	22.14915	-159.641425	Kauai	Wild forest	Partially Obstructed	yes	5	A	0	18.3	48.5	69.1	21.2	1244.891089	2017-08-08	10:12:00	NA	NA	https://storage.googleapis.com/elegansvariation.org/photos/hawaii2017/C-0818.thumb.jpg	Leaf litter
NA	NA	C-0819	NA	Tracks	NA	22.149067	-159.641372	Kauai	Wild forest	Partially Obstructed	yes	5	F	3	18.3	50	71.1	20.5	1248.137931	2017-08-08	10:10:00	NA	NA	https://storage.googleapis.com/elegansvariation.org/photos/hawaii2017/C-0819.thumb.jpg	Leaf litter
NA	NA	C-0820	NA	No	NA	22.149092	-159.641375	Kauai	Wild forest	Partially Obstructed	yes	5	E	3	18.1	56.5	72.1	21.2	1247.748634	2017-08-08	10:07:00	NA	NA	https://storage.googleapis.com/elegansvariation.org/photos/hawaii2017/C-0820.thumb.jpg	Leaf litter
NA	NA	C-0821	NA	No	NA	22.149078	-159.641369	Kauai	Wild forest	Partially Obstructed	yes	5	D	3	18.1	48	73.5	20.5	1246.255556	2017-08-08	10:05:00	NA	NA	https://storage.googleapis.com/elegansvariation.org/photos/hawaii2017/C-0821.thumb.jpg	Leaf litter
NA	NA	C-0822	NA	No	NA	22.146019	-159.639882	Kauai	Wild forest	Obstructed	no	NA	NA	NA	17.3	38	61.5	24	1263	2017-08-08	10:41:00	NA	NA	https://storage.googleapis.com/elegansvariation.org/photos/hawaii2017/C-0822.thumb.jpg	Vegetation
NA	NA	C-0823	NA	No	NA	22.1462255	-159.6398939	Kauai	Wild forest	Partially Obstructed	no	NA	NA	NA	18.2	57	58.9	25.3	1263	2017-08-08	10:39:00	NA	NA	https://storage.googleapis.com/elegansvariation.org/photos/hawaii2017/C-0823.thumb.jpg	Leaf litter
NA	NA	C-0824	NA	No	NA	22.1504926	-159.6456678	Kauai	Rural garden	Partially Obstructed	no	NA	NA	NA	18.2	55.5	57.9	24.7	1255	2017-08-08	08:55:00	NA	NA	https://storage.googleapis.com/elegansvariation.org/photos/hawaii2017/C-0824.thumb.jpg	Flower
NA	NA	C-0825	NA	No	NA	22.1460336	-159.6399157	Kauai	Wild forest	Obstructed	no	NA	NA	NA	17	38	60.6	24	1263	2017-08-08	10:44:00	NA	NA	https://storage.googleapis.com/elegansvariation.org/photos/hawaii2017/C-0825.thumb.jpg	Fruit
NA	NA	C-0826	NA	Tracks	NA	22.147056	-159.639708	Kauai	Wild forest	Partially Obstructed	no	NA	NA	NA	20.1	59	66.2	21.9	1256.685714	2017-08-08	10:49:00	NA	NA	https://storage.googleapis.com/elegansvariation.org/photos/hawaii2017/C-0826.thumb.jpg	Leaf litter
NA	NA	C-0827	NA	No	NA	22.1433561	-159.6404962	Kauai	Wild forest	Partially Obstructed	no	NA	NA	NA	18.6	57	65.2	21.9	1265	2017-08-08	11:00:00	NA	NA	https://storage.googleapis.com/elegansvariation.org/photos/hawaii2017/C-0827.thumb.jpg	Leaf litter
NA	NA	C-0828	NA	No	NA	22.145192	-159.640122	Kauai	Wild forest	Partially Obstructed	no	NA	NA	NA	18.6	58	67.5	21.9	1264.703125	2017-08-08	11:03:00	NA	NA	https://storage.googleapis.com/elegansvariation.org/photos/hawaii2017/C-0828.thumb.jpg	Leaf litter
NA	NA	C-0829	S-05394	Yes	Few (4-10)	22.132725	-159.660536	Kauai	Wild forest	Partially Obstructed	no	NA	NA	NA	17.2	56	84.9	18.8	1115.597701	2017-08-08	09:19:00	NA	NA	https://storage.googleapis.com/elegansvariation.org/photos/hawaii2017/C-0829.thumb.jpg	Leaf litter
NA	NA	C-0829	S-05397	Yes	Few (4-10)	22.132725	-159.660536	Kauai	Wild forest	Partially Obstructed	no	NA	NA	NA	17.2	56	84.9	18.8	1115.597701	2017-08-08	09:19:00	NA	NA	https://storage.googleapis.com/elegansvariation.org/photos/hawaii2017/C-0829.thumb.jpg	Leaf litter
NA	NA	C-0829	S-05405	Yes	Few (4-10)	22.132725	-159.660536	Kauai	Wild forest	Partially Obstructed	no	NA	NA	NA	17.2	56	84.9	18.8	1115.597701	2017-08-08	09:19:00	0	Unknown	https://storage.googleapis.com/elegansvariation.org/photos/hawaii2017/C-0829.thumb.jpg	Leaf litter
NA	NA	C-0829	S-05408	Yes	Few (4-10)	22.132725	-159.660536	Kauai	Wild forest	Partially Obstructed	no	NA	NA	NA	17.2	56	84.9	18.8	1115.597701	2017-08-08	09:19:00	NA	NA	https://storage.googleapis.com/elegansvariation.org/photos/hawaii2017/C-0829.thumb.jpg	Leaf litter
NA	NA	C-0829	S-05411	Yes	Few (4-10)	22.132725	-159.660536	Kauai	Wild forest	Partially Obstructed	no	NA	NA	NA	17.2	56	84.9	18.8	1115.597701	2017-08-08	09:19:00	0	Unknown	https://storage.googleapis.com/elegansvariation.org/photos/hawaii2017/C-0829.thumb.jpg	Leaf litter
NA	NA	C-0829	S-05412	Yes	Few (4-10)	22.132725	-159.660536	Kauai	Wild forest	Partially Obstructed	no	NA	NA	NA	17.2	56	84.9	18.8	1115.597701	2017-08-08	09:19:00	0	Unknown	https://storage.googleapis.com/elegansvariation.org/photos/hawaii2017/C-0829.thumb.jpg	Leaf litter
NA	NA	C-0830	NA	No	NA	22.132792	-159.660553	Kauai	Wild forest	Partially Obstructed	no	NA	NA	NA	17.1	NA	81	19.5	1119.496403	2017-08-08	09:23:00	NA	NA	https://storage.googleapis.com/elegansvariation.org/photos/hawaii2017/C-0830.thumb.jpg	Fruit
NA	NA	C-0831	S-05482	Yes	Very Few (1-3)	22.133392	-159.6608	Kauai	Wild forest	Partially Obstructed	no	NA	NA	NA	17.8	47.5	80.5	18.8	1102.135802	2017-08-08	09:27:00	0	Unknown	https://storage.googleapis.com/elegansvariation.org/photos/hawaii2017/C-0831.thumb.jpg	Leaf litter
NA	NA	C-0831	S-05491	Yes	Very Few (1-3)	22.133392	-159.6608	Kauai	Wild forest	Partially Obstructed	no	NA	NA	NA	17.8	47.5	80.5	18.8	1102.135802	2017-08-08	09:27:00	0	Unknown	https://storage.googleapis.com/elegansvariation.org/photos/hawaii2017/C-0831.thumb.jpg	Leaf litter
NA	NA	C-0831	S-05492	Yes	Very Few (1-3)	22.133392	-159.6608	Kauai	Wild forest	Partially Obstructed	no	NA	NA	NA	17.8	47.5	80.5	18.8	1102.135802	2017-08-08	09:27:00	0	Unknown	https://storage.googleapis.com/elegansvariation.org/photos/hawaii2017/C-0831.thumb.jpg	Leaf litter
NA	NA	C-0832	S-05335	Yes	Very Few (1-3)	22.141094	-159.649506	Kauai	Wild forest	Partially Obstructed	no	NA	NA	NA	19.6	47	71.2	21.5	1239.66129	2017-08-08	10:21:00	NA	NA	https://storage.googleapis.com/elegansvariation.org/photos/hawaii2017/C-0832.thumb.jpg	Leaf litter
NA	NA	C-0833	S-05263	Yes	Some (11-25)	22.141514	-159.650611	Kauai	Wild forest	Partially Obstructed	no	NA	NA	NA	19.8	38	67.5	22.2	1252.029703	2017-08-08	10:25:00	0	Unknown	https://storage.googleapis.com/elegansvariation.org/photos/hawaii2017/C-0833.thumb.jpg	Leaf litter
NA	NA	C-0833	S-05268	Yes	Some (11-25)	22.141514	-159.650611	Kauai	Wild forest	Partially Obstructed	no	NA	NA	NA	19.8	38	67.5	22.2	1252.029703	2017-08-08	10:25:00	0	Unknown	https://storage.googleapis.com/elegansvariation.org/photos/hawaii2017/C-0833.thumb.jpg	Leaf litter
NA	NA	C-0833	S-05279	Yes	Some (11-25)	22.141514	-159.650611	Kauai	Wild forest	Partially Obstructed	no	NA	NA	NA	19.8	38	67.5	22.2	1252.029703	2017-08-08	10:25:00	0	Unknown	https://storage.googleapis.com/elegansvariation.org/photos/hawaii2017/C-0833.thumb.jpg	Leaf litter
NA	NA	C-0833	S-05284	Yes	Some (11-25)	22.141514	-159.650611	Kauai	Wild forest	Partially Obstructed	no	NA	NA	NA	19.8	38	67.5	22.2	1252.029703	2017-08-08	10:25:00	0	Unknown	https://storage.googleapis.com/elegansvariation.org/photos/hawaii2017/C-0833.thumb.jpg	Leaf litter
NA	NA	C-0833	S-05305	Yes	Some (11-25)	22.141514	-159.650611	Kauai	Wild forest	Partially Obstructed	no	NA	NA	NA	19.8	38	67.5	22.2	1252.029703	2017-08-08	10:25:00	0	Unknown	https://storage.googleapis.com/elegansvariation.org/photos/hawaii2017/C-0833.thumb.jpg	Leaf litter
NA	NA	C-0833	S-05373	Yes	Some (11-25)	22.141514	-159.650611	Kauai	Wild forest	Partially Obstructed	no	NA	NA	NA	19.8	38	67.5	22.2	1252.029703	2017-08-08	10:25:00	0	Unknown	https://storage.googleapis.com/elegansvariation.org/photos/hawaii2017/C-0833.thumb.jpg	Leaf litter
NA	NA	C-0834	NA	No	NA	22.141631	-159.651239	Kauai	Wild forest	Partially Obstructed	no	NA	NA	NA	17.8	NA	66.3	21.5	1244.943182	2017-08-08	10:28:00	NA	NA	https://storage.googleapis.com/elegansvariation.org/photos/hawaii2017/C-0834.thumb.jpg	Fruit
NA	NA	C-0835	NA	No	NA	22.141906	-159.651753	Kauai	Wild forest	Partially Obstructed	no	NA	NA	NA	19.3	58	66.7	21.5	1238.264901	2017-08-08	10:30:00	NA	NA	https://storage.googleapis.com/elegansvariation.org/photos/hawaii2017/C-0835.thumb.jpg	Leaf litter
NA	NA	C-0836	NA	No	NA	22.142044	-159.652772	Kauai	Wild forest	Partially Obstructed	no	NA	NA	NA	17.5	47.5	71.1	21.5	1234.635965	2017-08-08	10:35:00	NA	NA	https://storage.googleapis.com/elegansvariation.org/photos/hawaii2017/C-0836.thumb.jpg	Leaf litter
NA	NA	C-0837	S-05433	Yes	Very Few (1-3)	22.142033	-159.652872	Kauai	Wild forest	Partially Obstructed	no	NA	NA	NA	18	48	70.4	21.5	1231.918605	2017-08-08	10:36:00	0	Unknown	https://storage.googleapis.com/elegansvariation.org/photos/hawaii2017/C-0837.thumb.jpg	Leaf litter
NA	NA	C-0837	S-05440	Yes	Very Few (1-3)	22.142033	-159.652872	Kauai	Wild forest	Partially Obstructed	no	NA	NA	NA	18	48	70.4	21.5	1231.918605	2017-08-08	10:36:00	0	Unknown	https://storage.googleapis.com/elegansvariation.org/photos/hawaii2017/C-0837.thumb.jpg	Leaf litter
NA	NA	C-0838	S-05507	Yes	Very Few (1-3)	22.142489	-159.653472	Kauai	Wild forest	Partially Obstructed	no	NA	NA	NA	17.1	54.5	63.9	21.5	1223.541667	2017-08-08	10:39:00	NA	NA	https://storage.googleapis.com/elegansvariation.org/photos/hawaii2017/C-0838.thumb.jpg	Leaf litter
NA	NA	C-0838	S-05508	Yes	Very Few (1-3)	22.142489	-159.653472	Kauai	Wild forest	Partially Obstructed	no	NA	NA	NA	17.1	54.5	63.9	21.5	1223.541667	2017-08-08	10:39:00	NA	NA	https://storage.googleapis.com/elegansvariation.org/photos/hawaii2017/C-0838.thumb.jpg	Leaf litter
NA	NA	C-0839	NA	No	NA	22.143275	-159.654475	Kauai	Wild forest	Partially Obstructed	no	NA	NA	NA	18.4	24	65.6	22.2	1225.752	2017-08-08	10:45:00	NA	NA	https://storage.googleapis.com/elegansvariation.org/photos/hawaii2017/C-0839.thumb.jpg	Leaf litter
NA	NA	C-0840	S-05251	Yes	Proliferating (25+)	22.143853	-159.655792	Kauai	Wild forest	Partially Obstructed	no	NA	NA	NA	19.2	52.5	65.2	23.4	1210.231884	2017-08-08	10:49:00	0	Unknown	https://storage.googleapis.com/elegansvariation.org/photos/hawaii2017/C-0840.thumb.jpg	Leaf litter
NA	NA	C-0840	S-05252	Yes	Proliferating (25+)	22.143853	-159.655792	Kauai	Wild forest	Partially Obstructed	no	NA	NA	NA	19.2	52.5	65.2	23.4	1210.231884	2017-08-08	10:49:00	0	Unknown	https://storage.googleapis.com/elegansvariation.org/photos/hawaii2017/C-0840.thumb.jpg	Leaf litter
NA	NA	C-0840	S-05265	Yes	Proliferating (25+)	22.143853	-159.655792	Kauai	Wild forest	Partially Obstructed	no	NA	NA	NA	19.2	52.5	65.2	23.4	1210.231884	2017-08-08	10:49:00	0	Unknown	https://storage.googleapis.com/elegansvariation.org/photos/hawaii2017/C-0840.thumb.jpg	Leaf litter
NA	NA	C-0840	S-05355	Yes	Proliferating (25+)	22.143853	-159.655792	Kauai	Wild forest	Partially Obstructed	no	NA	NA	NA	19.2	52.5	65.2	23.4	1210.231884	2017-08-08	10:49:00	0	Unknown	https://storage.googleapis.com/elegansvariation.org/photos/hawaii2017/C-0840.thumb.jpg	Leaf litter
NA	NA	C-0840	S-05356	Yes	Proliferating (25+)	22.143853	-159.655792	Kauai	Wild forest	Partially Obstructed	no	NA	NA	NA	19.2	52.5	65.2	23.4	1210.231884	2017-08-08	10:49:00	0	Unknown	https://storage.googleapis.com/elegansvariation.org/photos/hawaii2017/C-0840.thumb.jpg	Leaf litter
NA	NA	C-0841	S-05582	Yes	Very Few (1-3)	22.10248212	-159.3867246	Kauai	Wild forest	Partially Obstructed	no	NA	NA	NA	24	66	74.6	27.7	176	2017-08-09	13:41:00	0	Unknown	https://storage.googleapis.com/elegansvariation.org/photos/hawaii2017/C-0841.thumb.jpg	Leaf litter
NA	NA	C-0841	S-05585	Yes	Very Few (1-3)	22.10248212	-159.3867246	Kauai	Wild forest	Partially Obstructed	no	NA	NA	NA	24	66	74.6	27.7	176	2017-08-09	13:41:00	0	Unknown	https://storage.googleapis.com/elegansvariation.org/photos/hawaii2017/C-0841.thumb.jpg	Leaf litter
NA	NA	C-0841	S-05592	Yes	Very Few (1-3)	22.10248212	-159.3867246	Kauai	Wild forest	Partially Obstructed	no	NA	NA	NA	24	66	74.6	27.7	176	2017-08-09	13:41:00	0	Unknown	https://storage.googleapis.com/elegansvariation.org/photos/hawaii2017/C-0841.thumb.jpg	Leaf litter
NA	NA	C-0842	NA	No	NA	22.103764	-159.391428	Kauai	Wild forest	Obstructed	no	NA	NA	NA	23.9	67	74.7	26.7	201.7461538	2017-08-09	14:16:00	NA	NA	https://storage.googleapis.com/elegansvariation.org/photos/hawaii2017/C-0842.thumb.jpg	Leaf litter
NA	NA	C-0843	NA	No	NA	22.198947	-159.475747	Kauai	Wild forest	Partially Obstructed	no	NA	NA	NA	23	60.5	82.3	26	98.27333333	2017-08-10	09:07:00	NA	NA	https://storage.googleapis.com/elegansvariation.org/photos/hawaii2017/C-0843.thumb.jpg	Leaf litter
NA	NA	C-0844	NA	No	NA	20.670061	-156.335756	Maui	Wild forest	Partially Obstructed	no	NA	NA	NA	16.2	21.5	82.3	18.5	1908.829268	2017-08-14	09:53:00	NA	NA	https://storage.googleapis.com/elegansvariation.org/photos/hawaii2017/C-0844.thumb.jpg	Fungus
NA	NA	C-0845	NA	Tracks	NA	22.104131	-159.392014	Kauai	Wild forest	Partially Obstructed	no	NA	NA	NA	24.5	NA	75.1	26.7	216.5994832	2017-08-09	14:22:00	NA	NA	https://storage.googleapis.com/elegansvariation.org/photos/hawaii2017/C-0845.thumb.jpg	Fungus
NA	NA	C-0846	S-05666	Yes	Few (4-10)	22.103675	-159.391639	Kauai	Wild forest	Partially Obstructed	no	NA	NA	NA	23.5	NA	70.6	27.4	201.2539062	2017-08-09	14:19:00	1	C. briggsae	https://storage.googleapis.com/elegansvariation.org/photos/hawaii2017/C-0846.thumb.jpg	Flower
NA	NA	C-0846	S-05684	Yes	Few (4-10)	22.103675	-159.391639	Kauai	Wild forest	Partially Obstructed	no	NA	NA	NA	23.5	NA	70.6	27.4	201.2539062	2017-08-09	14:19:00	NA	NA	https://storage.googleapis.com/elegansvariation.org/photos/hawaii2017/C-0846.thumb.jpg	Flower
NA	NA	C-0847	S-05950	Yes	Proliferating (25+)	22.198492	-159.476669	Kauai	Wild forest	Partially Obstructed	no	NA	NA	NA	25.2	56	85.7	26	136.8304668	2017-08-10	09:11:00	0	Unknown	https://storage.googleapis.com/elegansvariation.org/photos/hawaii2017/C-0847.thumb.jpg	Leaf litter
NA	NA	C-0847	S-05951	Yes	Proliferating (25+)	22.198492	-159.476669	Kauai	Wild forest	Partially Obstructed	no	NA	NA	NA	25.2	56	85.7	26	136.8304668	2017-08-10	09:11:00	0	Unknown	https://storage.googleapis.com/elegansvariation.org/photos/hawaii2017/C-0847.thumb.jpg	Leaf litter
NA	NA	C-0848	NA	No	NA	20.670475	-156.336625	Maui	Wild forest	Partially Obstructed	no	NA	NA	NA	15.3	21.5	83.8	17.8	1886.876033	2017-08-14	09:58:00	NA	NA	https://storage.googleapis.com/elegansvariation.org/photos/hawaii2017/C-0848.thumb.jpg	Leaf litter
NA	NA	C-0849	S-05474	Yes	Few (4-10)	22.103744	-159.392369	Kauai	Wild forest	Partially Obstructed	no	NA	NA	NA	24.1	64	73.5	26.7	212.3110236	2017-08-09	14:32:00	0	Unknown	https://storage.googleapis.com/elegansvariation.org/photos/hawaii2017/C-0849.thumb.jpg	Leaf litter
NA	NA	C-0849	S-05475	Yes	Few (4-10)	22.103744	-159.392369	Kauai	Wild forest	Partially Obstructed	no	NA	NA	NA	24.1	64	73.5	26.7	212.3110236	2017-08-09	14:32:00	0	Unknown	https://storage.googleapis.com/elegansvariation.org/photos/hawaii2017/C-0849.thumb.jpg	Leaf litter
NA	NA	C-0850	NA	No	NA	22.103872	-159.390117	Kauai	Wild forest	Obstructed	no	NA	NA	NA	24.3	55	75.7	26.7	206.5585938	2017-08-09	14:09:00	NA	NA	https://storage.googleapis.com/elegansvariation.org/photos/hawaii2017/C-0850.thumb.jpg	Leaf litter
NA	NA	C-0851	S-05842	Yes	Proliferating (25+)	22.197839	-159.476856	Kauai	Wild forest	Partially Obstructed	no	NA	NA	NA	23.7	57.5	79.3	25.3	147.0514286	2017-08-10	09:16:00	0	Unknown	https://storage.googleapis.com/elegansvariation.org/photos/hawaii2017/C-0851.thumb.jpg	Leaf litter
NA	NA	C-0851	S-05843	Yes	Proliferating (25+)	22.197839	-159.476856	Kauai	Wild forest	Partially Obstructed	no	NA	NA	NA	23.7	57.5	79.3	25.3	147.0514286	2017-08-10	09:16:00	0	Unknown	https://storage.googleapis.com/elegansvariation.org/photos/hawaii2017/C-0851.thumb.jpg	Leaf litter
NA	NA	C-0852	S-06550	Yes	Very Few (1-3)	20.6723	-156.335097	Maui	Wild forest	Partially Obstructed	no	NA	NA	NA	13.8	21.5	79.4	17.8	1947.168	2017-08-14	09:48:00	NA	NA	https://storage.googleapis.com/elegansvariation.org/photos/hawaii2017/C-0852.thumb.jpg	Leaf litter
NA	NA	C-0853	S-05846	Yes	Some (11-25)	22.119697	-159.686314	Kauai	Wild forest	Partially Obstructed	no	NA	NA	NA	20.5	20.5	77.9	21.2	945.4150943	2017-08-10	09:10:00	0	Unknown	https://storage.googleapis.com/elegansvariation.org/photos/hawaii2017/C-0853.thumb.jpg	Fungus
NA	NA	C-0853	S-05847	Yes	Some (11-25)	22.119697	-159.686314	Kauai	Wild forest	Partially Obstructed	no	NA	NA	NA	20.5	20.5	77.9	21.2	945.4150943	2017-08-10	09:10:00	0	Unknown	https://storage.googleapis.com/elegansvariation.org/photos/hawaii2017/C-0853.thumb.jpg	Fungus
NA	NA	C-0853	S-05848	Yes	Some (11-25)	22.119697	-159.686314	Kauai	Wild forest	Partially Obstructed	no	NA	NA	NA	20.5	20.5	77.9	21.2	945.4150943	2017-08-10	09:10:00	0	Unknown	https://storage.googleapis.com/elegansvariation.org/photos/hawaii2017/C-0853.thumb.jpg	Fungus
NA	NA	C-0854	S-07477	Yes	Few (4-10)	22.104125	-159.3892	Kauai	Wild forest	Obstructed	no	NA	NA	NA	23.3	67	74	26	182.9014778	2017-08-09	14:04:00	0	Unknown	https://storage.googleapis.com/elegansvariation.org/photos/hawaii2017/C-0854.thumb.jpg	Leaf litter
NA	NA	C-0854	S-07484	Yes	Few (4-10)	22.104125	-159.3892	Kauai	Wild forest	Obstructed	no	NA	NA	NA	23.3	67	74	26	182.9014778	2017-08-09	14:04:00	0	Unknown	https://storage.googleapis.com/elegansvariation.org/photos/hawaii2017/C-0854.thumb.jpg	Leaf litter
NA	NA	C-0855	S-05767	Yes	Proliferating (25+)	22.197592	-159.477408	Kauai	Wild forest	Partially Obstructed	no	NA	NA	NA	23.3	57	79.4	26	155.2906178	2017-08-10	09:27:00	0	Unknown	https://storage.googleapis.com/elegansvariation.org/photos/hawaii2017/C-0855.thumb.jpg	Leaf litter
NA	NA	C-0855	S-05768	Yes	Proliferating (25+)	22.197592	-159.477408	Kauai	Wild forest	Partially Obstructed	no	NA	NA	NA	23.3	57	79.4	26	155.2906178	2017-08-10	09:27:00	0	Unknown	https://storage.googleapis.com/elegansvariation.org/photos/hawaii2017/C-0855.thumb.jpg	Leaf litter
NA	NA	C-0856	NA	Tracks	NA	20.672456	-156.333333	Maui	Wild forest	Partially Obstructed	no	NA	NA	NA	15.4	61	85.7	17.1	1941.192308	2017-08-14	09:41:00	NA	NA	https://storage.googleapis.com/elegansvariation.org/photos/hawaii2017/C-0856.thumb.jpg	Leaf litter
NA	NA	C-0857	S-05226	Yes	Proliferating (25+)	22.103878	-159.388872	Kauai	Wild forest	Partially Obstructed	no	NA	NA	NA	24.6	NA	77.4	26	178.6024096	2017-08-09	14:48:00	1	Oscheius sp.	https://storage.googleapis.com/elegansvariation.org/photos/hawaii2017/C-0857.thumb.jpg	Fruit
NA	NA	C-0857	S-05230	Yes	Proliferating (25+)	22.103878	-159.388872	Kauai	Wild forest	Partially Obstructed	no	NA	NA	NA	24.6	NA	77.4	26	178.6024096	2017-08-09	14:48:00	1	Oscheius sp.	https://storage.googleapis.com/elegansvariation.org/photos/hawaii2017/C-0857.thumb.jpg	Fruit
NA	NA	C-0858	NA	Tracks	NA	22.104111	-159.3889	Kauai	Wild forest	Partially Obstructed	no	NA	NA	NA	24.1	NA	76.9	27.4	182.8000488	2017-08-09	13:55:00	NA	NA	https://storage.googleapis.com/elegansvariation.org/photos/hawaii2017/C-0858.thumb.jpg	Fungus
NA	NA	C-0859	S-05756	Yes	Some (11-25)	22.196744	-159.477839	Kauai	Wild forest	Partially Obstructed	no	NA	NA	NA	22.7	43.5	81.6	25.3	173.2880435	2017-08-10	09:31:00	NA	NA	https://storage.googleapis.com/elegansvariation.org/photos/hawaii2017/C-0859.thumb.jpg	Leaf litter
NA	NA	C-0859	S-05757	Yes	Some (11-25)	22.196744	-159.477839	Kauai	Wild forest	Partially Obstructed	no	NA	NA	NA	22.7	43.5	81.6	25.3	173.2880435	2017-08-10	09:31:00	0	Unknown	https://storage.googleapis.com/elegansvariation.org/photos/hawaii2017/C-0859.thumb.jpg	Leaf litter
NA	NA	C-0860	NA	Tracks	NA	20.672531	-156.334956	Maui	Wild forest	Partially Obstructed	no	NA	NA	NA	15.5	44.5	84.4	16.4	1949.940299	2017-08-14	09:46:00	NA	NA	https://storage.googleapis.com/elegansvariation.org/photos/hawaii2017/C-0860.thumb.jpg	Leaf litter
NA	NA	C-0861	S-05796	Yes	Very Few (1-3)	22.198547	-159.477239	Kauai	Wild forest	Partially Obstructed	no	NA	NA	NA	23.7	57	80.2	27.055555555555557	162.0331126	2017-08-10	09:23:00	NA	NA	https://storage.googleapis.com/elegansvariation.org/photos/hawaii2017/C-0861.thumb.jpg	Leaf litter
NA	NA	C-0862	NA	No	NA	22.1041	-159.388972	Kauai	Wild forest	Partially Obstructed	no	NA	NA	NA	24.3	NA	79.6	27.4	147.8746269	2017-08-09	13:54:00	NA	NA	https://storage.googleapis.com/elegansvariation.org/photos/hawaii2017/C-0862.thumb.jpg	Fungus
NA	NA	C-0863	NA	No	NA	22.195639	-159.47795	Kauai	Wild forest	Partially Obstructed	no	NA	NA	NA	21.8	58.5	79.6	25.3	177.2131148	2017-08-10	09:35:00	NA	NA	https://storage.googleapis.com/elegansvariation.org/photos/hawaii2017/C-0863.thumb.jpg	Leaf litter
NA	NA	C-0865	S-06649	Yes	Some (11-25)	20.8706192	-156.1798334	Maui	Wild forest	Partially Obstructed	no	NA	NA	NA	24.6	69	63.9	29.1	205	2017-08-15	15:06:00	NA	NA	https://storage.googleapis.com/elegansvariation.org/photos/hawaii2017/C-0865.thumb.jpg	Flower
NA	NA	C-0865	S-06659	Yes	Some (11-25)	20.8706192	-156.1798334	Maui	Wild forest	Partially Obstructed	no	NA	NA	NA	24.6	69	63.9	29.1	205	2017-08-15	15:06:00	0	Unknown	https://storage.googleapis.com/elegansvariation.org/photos/hawaii2017/C-0865.thumb.jpg	Flower
NA	NA	C-0866	S-07473	Yes	Very Few (1-3)	22.103936	-159.388972	Kauai	Wild forest	Partially Obstructed	no	NA	NA	NA	24.1	67	81.3	26.7	183.9050279	2017-08-09	13:52:00	0	Unknown	https://storage.googleapis.com/elegansvariation.org/photos/hawaii2017/C-0866.thumb.jpg	Leaf litter
NA	NA	C-0867	NA	No	NA	22.134336	-159.664547	Kauai	Wild forest	Partially Obstructed	no	NA	NA	NA	25	NA	68	24	1058.16	2017-08-10	12:12:00	NA	NA	https://storage.googleapis.com/elegansvariation.org/photos/hawaii2017/C-0867.thumb.jpg	Fungus
NA	NA	C-0868	S-06765	Yes	Few (4-10)	20.870622	-156.179826	Maui	Wild forest	Partially Obstructed	no	NA	NA	NA	NA	69	74.1	25.6	205	2017-08-15	15:01:00	NA	NA	https://storage.googleapis.com/elegansvariation.org/photos/hawaii2017/C-0868.thumb.jpg	Leaf litter
NA	NA	C-0868	S-06766	Yes	Few (4-10)	20.870622	-156.179826	Maui	Wild forest	Partially Obstructed	no	NA	NA	NA	NA	69	74.1	25.6	205	2017-08-15	15:01:00	NA	NA	https://storage.googleapis.com/elegansvariation.org/photos/hawaii2017/C-0868.thumb.jpg	Leaf litter
NA	NA	C-0869	NA	Tracks	NA	20.881462	-156.5158585	Maui	Wild forest	Partially Obstructed	no	NA	NA	NA	28.9	22	66	30.4	202	2017-08-13	11:53:00	NA	NA	https://storage.googleapis.com/elegansvariation.org/photos/hawaii2017/C-0869.thumb.jpg	Leaf litter
NA	NA	C-0870	S-06681	Yes	Few (4-10)	20.79521427	-156.0758536	Maui	Wild forest	Partially Obstructed	no	NA	NA	NA	23.4	65.5	72.4	25.6	337	2017-08-15	15:48:00	NA	NA	https://storage.googleapis.com/elegansvariation.org/photos/hawaii2017/C-0870.thumb.jpg	Leaf litter
NA	NA	C-0870	S-06705	Yes	Few (4-10)	20.79521427	-156.0758536	Maui	Wild forest	Partially Obstructed	no	NA	NA	NA	23.4	65.5	72.4	25.6	337	2017-08-15	15:48:00	0	Unknown	https://storage.googleapis.com/elegansvariation.org/photos/hawaii2017/C-0870.thumb.jpg	Leaf litter
NA	NA	C-0870	S-06706	Yes	Few (4-10)	20.79521427	-156.0758536	Maui	Wild forest	Partially Obstructed	no	NA	NA	NA	23.4	65.5	72.4	25.6	337	2017-08-15	15:48:00	NA	NA	https://storage.googleapis.com/elegansvariation.org/photos/hawaii2017/C-0870.thumb.jpg	Leaf litter
NA	NA	C-0871	NA	No	NA	22.1353	-159.666558	Kauai	Wild forest	Obstructed	no	NA	NA	NA	21.7	58	73	24	1037.956284	2017-08-10	12:18:00	NA	NA	https://storage.googleapis.com/elegansvariation.org/photos/hawaii2017/C-0871.thumb.jpg	Fruit
NA	NA	C-0873	NA	No	NA	20.880364	-156.545958	Maui	Wild forest	Partially Obstructed	no	NA	NA	NA	32.6	35	64	27.4	291.9112903	2017-08-13	10:57:00	NA	NA	https://storage.googleapis.com/elegansvariation.org/photos/hawaii2017/C-0873.thumb.jpg	Flower
NA	NA	C-0874	S-07490	Yes	Very Few (1-3)	22.103753	-159.38845	Kauai	Wild forest	Partially Obstructed	no	NA	NA	NA	25.3	NA	82.3	28.1	174.8713969	2017-08-09	13:49:00	0	Unknown	https://storage.googleapis.com/elegansvariation.org/photos/hawaii2017/C-0874.thumb.jpg	Flower
NA	NA	C-0874	S-07491	Yes	Very Few (1-3)	22.103753	-159.38845	Kauai	Wild forest	Partially Obstructed	no	NA	NA	NA	25.3	NA	82.3	28.1	174.8713969	2017-08-09	13:49:00	0	Unknown	https://storage.googleapis.com/elegansvariation.org/photos/hawaii2017/C-0874.thumb.jpg	Flower
NA	NA	C-0875	S-05808	Yes	Some (11-25)	22.04649654	-159.3573668	Kauai	Urban garden	Partially Obstructed	no	NA	NA	NA	29.7	61	59.6	30.8	68	2017-08-10	15:15:00	0	Unknown	https://storage.googleapis.com/elegansvariation.org/photos/hawaii2017/C-0875.thumb.jpg	Flower
NA	NA	C-0875	S-05810	Yes	Some (11-25)	22.04649654	-159.3573668	Kauai	Urban garden	Partially Obstructed	no	NA	NA	NA	29.7	61	59.6	30.8	68	2017-08-10	15:15:00	0	Unknown	https://storage.googleapis.com/elegansvariation.org/photos/hawaii2017/C-0875.thumb.jpg	Flower
NA	NA	C-0876	S-06682	Yes	Few (4-10)	20.79521364	-156.0758536	Maui	Wild forest	Partially Obstructed	no	NA	NA	NA	24.5	61	75.1	25.6	337	2017-08-15	15:46:00	0	Unknown	https://storage.googleapis.com/elegansvariation.org/photos/hawaii2017/C-0876.thumb.jpg	Leaf litter
NA	NA	C-0876	S-06683	Yes	Few (4-10)	20.79521364	-156.0758536	Maui	Wild forest	Partially Obstructed	no	NA	NA	NA	24.5	61	75.1	25.6	337	2017-08-15	15:46:00	0	Unknown	https://storage.googleapis.com/elegansvariation.org/photos/hawaii2017/C-0876.thumb.jpg	Leaf litter
NA	NA	C-0876	S-06684	Yes	Few (4-10)	20.79521364	-156.0758536	Maui	Wild forest	Partially Obstructed	no	NA	NA	NA	24.5	61	75.1	25.6	337	2017-08-15	15:46:00	0	Unknown	https://storage.googleapis.com/elegansvariation.org/photos/hawaii2017/C-0876.thumb.jpg	Leaf litter
NA	NA	C-0877	S-06456	Yes	Very Few (1-3)	21.138683	-156.962086	Molokai	Wild forest	Partially Obstructed	no	NA	NA	NA	19	66.5	77.9	21.9	809.8974359	2017-08-12	11:43:00	NA	NA	https://storage.googleapis.com/elegansvariation.org/photos/hawaii2017/C-0877.thumb.jpg	Leaf litter
NA	NA	C-0878	S-05935	Yes	Proliferating (25+)	22.200642	-159.475083	Kauai	Wild forest	Partially Obstructed	no	NA	NA	NA	23.1	73.5	81.8	24.4	40.05298651	2017-08-10	08:50:00	0	Unknown	https://storage.googleapis.com/elegansvariation.org/photos/hawaii2017/C-0878.thumb.jpg	Leaf litter
NA	NA	C-0878	S-05936	Yes	Proliferating (25+)	22.200642	-159.475083	Kauai	Wild forest	Partially Obstructed	no	NA	NA	NA	23.1	73.5	81.8	24.4	40.05298651	2017-08-10	08:50:00	0	Unknown	https://storage.googleapis.com/elegansvariation.org/photos/hawaii2017/C-0878.thumb.jpg	Leaf litter
NA	NA	C-0878	S-05949	Yes	Proliferating (25+)	22.200642	-159.475083	Kauai	Wild forest	Partially Obstructed	no	NA	NA	NA	23.1	73.5	81.8	24.4	40.05298651	2017-08-10	08:50:00	1	C. briggsae	https://storage.googleapis.com/elegansvariation.org/photos/hawaii2017/C-0878.thumb.jpg	Leaf litter
NA	NA	C-0879	S-05691	Yes	Some (11-25)	22.046483	-159.357803	Kauai	Urban garden	Partially Obstructed	no	NA	NA	NA	27.3	64	60.4	30.2	76.54214559	2017-08-10	15:12:00	0	Unknown	https://storage.googleapis.com/elegansvariation.org/photos/hawaii2017/C-0879.thumb.jpg	Vegetation
NA	NA	C-0879	S-05696	Yes	Some (11-25)	22.046483	-159.357803	Kauai	Urban garden	Partially Obstructed	no	NA	NA	NA	27.3	64	60.4	30.2	76.54214559	2017-08-10	15:12:00	NA	NA	https://storage.googleapis.com/elegansvariation.org/photos/hawaii2017/C-0879.thumb.jpg	Vegetation
NA	NA	C-0881	NA	No	NA	21.139542	-156.974289	Molokai	Wild forest	Full	no	NA	NA	NA	NA	25	62.2	25.8	661.2151899	2017-08-12	12:56:00	NA	NA	https://storage.googleapis.com/elegansvariation.org/photos/hawaii2017/C-0881.thumb.jpg	Leaf litter
NA	NA	C-0882	NA	No	NA	22.2018	-159.473528	Kauai	Wild forest	Partially Obstructed	no	NA	NA	NA	23.5	NA	82.8	27.4	12.00971223	2017-08-10	08:42:00	NA	NA	https://storage.googleapis.com/elegansvariation.org/photos/hawaii2017/C-0882.thumb.jpg	Fruit
NA	NA	C-0883	S-05698	Yes	Very Few (1-3)	22.046528	-159.357272	Kauai	Urban garden	Partially Obstructed	no	NA	NA	NA	29.2	44.5	63.1	29.5	72.9676259	2017-08-10	15:17:00	NA	NA	https://storage.googleapis.com/elegansvariation.org/photos/hawaii2017/C-0883.thumb.jpg	Flower
NA	NA	C-0884	S-06691	Yes	Very Few (1-3)	20.912386	-156.243129	Maui	Wild forest	Partially Obstructed	no	NA	NA	NA	21.9	51	71.8	26.3	158	2017-08-15	15:50:00	0	Unknown	https://storage.googleapis.com/elegansvariation.org/photos/hawaii2017/C-0884.thumb.jpg	Leaf litter
NA	NA	C-0885	NA	No	NA	21.165624	-157.048623	Molokai	Agricultural land	Partially Obstructed	no	NA	NA	NA	26.1	NA	66.7	28.1	258	2017-08-12	10:20:00	NA	NA	https://storage.googleapis.com/elegansvariation.org/photos/hawaii2017/C-0885.thumb.jpg	Fruit
NA	NA	C-0886	NA	No	NA	22.201636	-159.473622	Kauai	Wild forest	Partially Obstructed	no	NA	NA	NA	23.1	NA	80.9	26.7	13.34015748	2017-08-10	08:44:00	NA	NA	https://storage.googleapis.com/elegansvariation.org/photos/hawaii2017/C-0886.thumb.jpg	Fruit
NA	NA	C-0887	NA	No	NA	22.046644	-159.357194	Kauai	Urban garden	Partially Obstructed	no	NA	NA	NA	NA	NA	60.8	30.8	66.54745763	2017-08-10	15:18:00	NA	NA	https://storage.googleapis.com/elegansvariation.org/photos/hawaii2017/C-0887.thumb.jpg	Flower
NA	NA	C-0889	S-06514	Yes	Few (4-10)	21.138075	-156.965825	Molokai	Wild forest	Obstructed	yes	20	B	3	21.8	67	68.6	26	759.7380952	2017-08-12	12:24:00	NA	NA	https://storage.googleapis.com/elegansvariation.org/photos/hawaii2017/C-0889.thumb.jpg	Leaf litter
NA	NA	C-0890	S-05902	Yes	Few (4-10)	22.200692	-159.474906	Kauai	Wild forest	Partially Obstructed	no	NA	NA	NA	23.8	68.5	84.1	27.4	45.05384063	2017-08-10	08:54:00	NA	NA	https://storage.googleapis.com/elegansvariation.org/photos/hawaii2017/C-0890.thumb.jpg	Leaf litter
NA	NA	C-0890	S-05911	Yes	Few (4-10)	22.200692	-159.474906	Kauai	Wild forest	Partially Obstructed	no	NA	NA	NA	23.8	68.5	84.1	27.4	45.05384063	2017-08-10	08:54:00	NA	NA	https://storage.googleapis.com/elegansvariation.org/photos/hawaii2017/C-0890.thumb.jpg	Leaf litter
NA	NA	C-0891	S-05769	Yes	Few (4-10)	22.042781	-159.360589	Kauai	Wild forest	Partially Obstructed	no	NA	NA	NA	30.6	48	60.8	29.5	3.327302632	2017-08-10	15:25:00	0	Unknown	https://storage.googleapis.com/elegansvariation.org/photos/hawaii2017/C-0891.thumb.jpg	Flower
NA	NA	C-0891	S-05779	Yes	Few (4-10)	22.042781	-159.360589	Kauai	Wild forest	Partially Obstructed	no	NA	NA	NA	30.6	48	60.8	29.5	3.327302632	2017-08-10	15:25:00	NA	NA	https://storage.googleapis.com/elegansvariation.org/photos/hawaii2017/C-0891.thumb.jpg	Flower
NA	NA	C-0893	NA	No	NA	21.166405	-157.048985	Molokai	Agricultural land	Partially Obstructed	no	NA	NA	NA	25.4	69.8	64.6	28.8	257	2017-08-12	10:18:00	NA	NA	https://storage.googleapis.com/elegansvariation.org/photos/hawaii2017/C-0893.thumb.jpg	Fruit
NA	NA	C-0894	NA	No	NA	22.199061	-159.475361	Kauai	Wild forest	Partially Obstructed	no	NA	NA	NA	24.4	67.5	77	26.7	85.25510204	2017-08-10	09:04:00	NA	NA	https://storage.googleapis.com/elegansvariation.org/photos/hawaii2017/C-0894.thumb.jpg	Leaf litter
NA	NA	C-0895	NA	No	NA	22.04295	-159.360792	Kauai	Wild forest	Partially Obstructed	NA	NA	NA	NA	34.1	61	57.1	31.5	5.369172932	2017-08-10	15:37:00	NA	NA	https://storage.googleapis.com/elegansvariation.org/photos/hawaii2017/C-0895.thumb.jpg	Flower
NA	NA	C-0896	S-06665	Yes	Some (11-25)	20.79521364	-156.0758536	Maui	Wild forest	Partially Obstructed	yes	15	F	2	22.2	67.5	81.1	24.3	337	2017-08-15	15:37:00	NA	NA	https://storage.googleapis.com/elegansvariation.org/photos/hawaii2017/C-0896.thumb.jpg	Leaf litter
NA	NA	C-0896	S-06666	Yes	Some (11-25)	20.79521364	-156.0758536	Maui	Wild forest	Partially Obstructed	yes	15	F	2	22.2	67.5	81.1	24.3	337	2017-08-15	15:37:00	NA	NA	https://storage.googleapis.com/elegansvariation.org/photos/hawaii2017/C-0896.thumb.jpg	Leaf litter
NA	NA	C-0896	S-06667	Yes	Some (11-25)	20.79521364	-156.0758536	Maui	Wild forest	Partially Obstructed	yes	15	F	2	22.2	67.5	81.1	24.3	337	2017-08-15	15:37:00	NA	NA	https://storage.googleapis.com/elegansvariation.org/photos/hawaii2017/C-0896.thumb.jpg	Leaf litter
NA	NA	C-0897	S-06448	Yes	Very Few (1-3)	21.138594	-156.962206	Molokai	Wild forest	Partially Obstructed	no	NA	NA	NA	19.4	30.8	76	22.6	801.7966102	2017-08-12	11:48:00	NA	NA	https://storage.googleapis.com/elegansvariation.org/photos/hawaii2017/C-0897.thumb.jpg	Fruit
NA	NA	C-0898	S-05917	Yes	Proliferating (25+)	22.199936	-159.474839	Kauai	Wild forest	Obstructed	no	NA	NA	NA	24.2	60.5	78.1	27.4	60.91036415	2017-08-10	08:59:00	0	Unknown	https://storage.googleapis.com/elegansvariation.org/photos/hawaii2017/C-0898.thumb.jpg	Leaf litter
NA	NA	C-0898	S-05925	Yes	Proliferating (25+)	22.199936	-159.474839	Kauai	Wild forest	Obstructed	no	NA	NA	NA	24.2	60.5	78.1	27.4	60.91036415	2017-08-10	08:59:00	0	Unknown	https://storage.googleapis.com/elegansvariation.org/photos/hawaii2017/C-0898.thumb.jpg	Leaf litter
NA	NA	C-0899	NA	No	NA	20.676633	-156.331972	Maui	Wild forest	Partially Obstructed	no	NA	NA	NA	11.1	60.5	83.9	15.3	1887.736111	2017-08-14	09:10:00	NA	NA	https://storage.googleapis.com/elegansvariation.org/photos/hawaii2017/C-0899.thumb.jpg	Leaf litter
NA	NA	C-0900	S-06564	Yes	Few (4-10)	20.79521364	-156.0758536	Maui	Wild forest	Partially Obstructed	yes	15	E	2	22.1	65.5	78.3	24.9	337	2017-08-15	15:35:00	NA	NA	https://storage.googleapis.com/elegansvariation.org/photos/hawaii2017/C-0900.thumb.jpg	Leaf litter
NA	NA	C-0900	S-06671	Yes	Few (4-10)	20.79521364	-156.0758536	Maui	Wild forest	Partially Obstructed	yes	15	E	2	22.1	65.5	78.3	24.9	337	2017-08-15	15:35:00	NA	NA	https://storage.googleapis.com/elegansvariation.org/photos/hawaii2017/C-0900.thumb.jpg	Leaf litter
NA	NA	C-0901	S-06561	Yes	Very Few (1-3)	20.813907	-156.119858	Maui	Wild forest	Partially Obstructed	no	NA	NA	NA	21.8	66	90.7	23.6	388	2017-08-15	10:42:00	NA	NA	https://storage.googleapis.com/elegansvariation.org/photos/hawaii2017/C-0901.thumb.jpg	Leaf litter
NA	NA	C-0902	NA	No	NA	22.086656	-159.391669	Kauai	Wild grassland	Partially Obstructed	no	NA	NA	NA	24.7	60	55.1	31.166666666666664	234.7581227	2017-08-10	13:55:00	NA	NA	https://storage.googleapis.com/elegansvariation.org/photos/hawaii2017/C-0902.thumb.jpg	Leaf litter
NA	NA	C-0903	S-05786	Yes	Proliferating (25+)	22.196914	-159.477867	Kauai	Wild forest	Partially Obstructed	no	NA	NA	NA	23.2	56	83.4	24.94444444444445	176.825603	2017-08-10	09:29:00	1	Oscheius sp.	https://storage.googleapis.com/elegansvariation.org/photos/hawaii2017/C-0903.thumb.jpg	Leaf litter
NA	NA	C-0903	S-05934	Yes	Proliferating (25+)	22.196914	-159.477867	Kauai	Wild forest	Partially Obstructed	no	NA	NA	NA	23.2	56	83.4	24.94444444444445	176.825603	2017-08-10	09:29:00	1	Oscheius sp.	https://storage.googleapis.com/elegansvariation.org/photos/hawaii2017/C-0903.thumb.jpg	Leaf litter
NA	NA	C-0904	NA	No	NA	20.79521364	-156.0758536	Maui	Wild forest	Partially Obstructed	yes	15	B	2	21.5	67.5	75.1	25.6	337	2017-08-15	15:27:00	NA	NA	https://storage.googleapis.com/elegansvariation.org/photos/hawaii2017/C-0904.thumb.jpg	Leaf litter
NA	NA	C-0905	S-06580	Yes	Proliferating (25+)	20.814052	-156.119866	Maui	Wild forest	Partially Obstructed	no	NA	NA	NA	22.6	61	88.3	23.6	388	2017-08-15	10:50:00	1	C. briggsae	https://storage.googleapis.com/elegansvariation.org/photos/hawaii2017/C-0905.thumb.jpg	Flower
NA	NA	C-0905	S-06581	Yes	Proliferating (25+)	20.814052	-156.119866	Maui	Wild forest	Partially Obstructed	no	NA	NA	NA	22.6	61	88.3	23.6	388	2017-08-15	10:50:00	1	C. briggsae	https://storage.googleapis.com/elegansvariation.org/photos/hawaii2017/C-0905.thumb.jpg	Flower
NA	NA	C-0905	S-06582	Yes	Proliferating (25+)	20.814052	-156.119866	Maui	Wild forest	Partially Obstructed	no	NA	NA	NA	22.6	61	88.3	23.6	388	2017-08-15	10:50:00	1	C. briggsae	https://storage.googleapis.com/elegansvariation.org/photos/hawaii2017/C-0905.thumb.jpg	Flower
NA	NA	C-0906	S-05903	Yes	Proliferating (25+)	22.087617	-159.392406	Kauai	Wild grassland	Partially Obstructed	no	NA	NA	NA	25.7	64	61.5	30.444444444444443	242.9229249	2017-08-10	14:00:00	0	Unknown	https://storage.googleapis.com/elegansvariation.org/photos/hawaii2017/C-0906.thumb.jpg	Leaf litter
NA	NA	C-0906	S-05906	Yes	Proliferating (25+)	22.087617	-159.392406	Kauai	Wild grassland	Partially Obstructed	no	NA	NA	NA	25.7	64	61.5	30.444444444444443	242.9229249	2017-08-10	14:00:00	NA	NA	https://storage.googleapis.com/elegansvariation.org/photos/hawaii2017/C-0906.thumb.jpg	Leaf litter
NA	NA	C-0907	S-05721	Yes	Proliferating (25+)	22.196469	-159.477886	Kauai	Wild forest	Partially Obstructed	no	NA	NA	NA	23.4	54	84.4	24.94444444444445	179.1897233	2017-08-10	09:31:00	0	Unknown	https://storage.googleapis.com/elegansvariation.org/photos/hawaii2017/C-0907.thumb.jpg	Leaf litter
NA	NA	C-0907	S-05727	Yes	Proliferating (25+)	22.196469	-159.477886	Kauai	Wild forest	Partially Obstructed	no	NA	NA	NA	23.4	54	84.4	24.94444444444445	179.1897233	2017-08-10	09:31:00	0	Unknown	https://storage.googleapis.com/elegansvariation.org/photos/hawaii2017/C-0907.thumb.jpg	Leaf litter
NA	NA	C-0908	S-06656	Yes	Few (4-10)	20.874575	-156.186331	Maui	Wild forest	Partially Obstructed	yes	15	D	2	22.1	67.5	77.5	24.9	242	2017-08-15	15:32:00	NA	NA	https://storage.googleapis.com/elegansvariation.org/photos/hawaii2017/C-0908.thumb.jpg	Leaf litter
NA	NA	C-0908	S-06657	Yes	Few (4-10)	20.874575	-156.186331	Maui	Wild forest	Partially Obstructed	yes	15	D	2	22.1	67.5	77.5	24.9	242	2017-08-15	15:32:00	NA	NA	https://storage.googleapis.com/elegansvariation.org/photos/hawaii2017/C-0908.thumb.jpg	Leaf litter
NA	NA	C-0908	S-06658	Yes	Few (4-10)	20.874575	-156.186331	Maui	Wild forest	Partially Obstructed	yes	15	D	2	22.1	67.5	77.5	24.9	242	2017-08-15	15:32:00	NA	NA	https://storage.googleapis.com/elegansvariation.org/photos/hawaii2017/C-0908.thumb.jpg	Leaf litter
NA	NA	C-0909	S-06593	Yes	Some (11-25)	20.814048	-156.11988	Maui	Wild forest	Partially Obstructed	no	NA	NA	NA	22.3	74.5	88.9	23.6	388	2017-08-15	10:49:00	0	Unknown	https://storage.googleapis.com/elegansvariation.org/photos/hawaii2017/C-0909.thumb.jpg	Fruit
NA	NA	C-0909	S-06594	Yes	Some (11-25)	20.814048	-156.11988	Maui	Wild forest	Partially Obstructed	no	NA	NA	NA	22.3	74.5	88.9	23.6	388	2017-08-15	10:49:00	0	Unknown	https://storage.googleapis.com/elegansvariation.org/photos/hawaii2017/C-0909.thumb.jpg	Fruit
NA	NA	C-0909	S-06605	Yes	Some (11-25)	20.814048	-156.11988	Maui	Wild forest	Partially Obstructed	no	NA	NA	NA	22.3	74.5	88.9	23.6	388	2017-08-15	10:49:00	0	Unknown	https://storage.googleapis.com/elegansvariation.org/photos/hawaii2017/C-0909.thumb.jpg	Fruit
NA	NA	C-0910	S-05908	Yes	Proliferating (25+)	22.087667	-159.392383	Kauai	Wild grassland	Partially Obstructed	no	NA	NA	NA	29.2	NA	61.4	29.777777777777775	243.2222222	2017-08-10	14:01:00	0	Unknown	https://storage.googleapis.com/elegansvariation.org/photos/hawaii2017/C-0910.thumb.jpg	Fruit
NA	NA	C-0910	S-05912	Yes	Proliferating (25+)	22.087667	-159.392383	Kauai	Wild grassland	Partially Obstructed	no	NA	NA	NA	29.2	NA	61.4	29.777777777777775	243.2222222	2017-08-10	14:01:00	0	Unknown	https://storage.googleapis.com/elegansvariation.org/photos/hawaii2017/C-0910.thumb.jpg	Fruit
NA	NA	C-0911	S-05904	Yes	Proliferating (25+)	22.1947	-159.47835	Kauai	Wild forest	Obstructed	no	NA	NA	NA	23.5	53.5	83.8	24.94444444444445	196.0945274	2017-08-10	09:42:00	0	Unknown	https://storage.googleapis.com/elegansvariation.org/photos/hawaii2017/C-0911.thumb.jpg	Leaf litter
NA	NA	C-0911	S-05907	Yes	Proliferating (25+)	22.1947	-159.47835	Kauai	Wild forest	Obstructed	no	NA	NA	NA	23.5	53.5	83.8	24.94444444444445	196.0945274	2017-08-10	09:42:00	0	Unknown	https://storage.googleapis.com/elegansvariation.org/photos/hawaii2017/C-0911.thumb.jpg	Leaf litter
NA	NA	C-0912	S-06707	Yes	Few (4-10)	20.874467	-156.1857636	Maui	Wild forest	Partially Obstructed	yes	15	C	2	22.1	66	75.6	25.6	223	2017-08-15	15:29:00	0	Unknown	https://storage.googleapis.com/elegansvariation.org/photos/hawaii2017/C-0912.thumb.jpg	Leaf litter
NA	NA	C-0912	S-06718	Yes	Few (4-10)	20.874467	-156.1857636	Maui	Wild forest	Partially Obstructed	yes	15	C	2	22.1	66	75.6	25.6	223	2017-08-15	15:29:00	0	Unknown	https://storage.googleapis.com/elegansvariation.org/photos/hawaii2017/C-0912.thumb.jpg	Leaf litter
NA	NA	C-0913	S-06733	Yes	Few (4-10)	20.782559	-156.013981	Maui	Wild forest	Partially Obstructed	no	NA	NA	NA	26.5	57.5	83.4	26.7	86	2017-08-15	09:36:00	NA	NA	https://storage.googleapis.com/elegansvariation.org/photos/hawaii2017/C-0913.thumb.jpg	Flower
NA	NA	C-0913	S-06734	Yes	Few (4-10)	20.782559	-156.013981	Maui	Wild forest	Partially Obstructed	no	NA	NA	NA	26.5	57.5	83.4	26.7	86	2017-08-15	09:36:00	1	C. briggsae	https://storage.googleapis.com/elegansvariation.org/photos/hawaii2017/C-0913.thumb.jpg	Flower
NA	NA	C-0913	S-06735	Yes	Few (4-10)	20.782559	-156.013981	Maui	Wild forest	Partially Obstructed	no	NA	NA	NA	26.5	57.5	83.4	26.7	86	2017-08-15	09:36:00	NA	NA	https://storage.googleapis.com/elegansvariation.org/photos/hawaii2017/C-0913.thumb.jpg	Flower
NA	NA	C-0914	S-05742	Yes	Few (4-10)	22.088439	-159.392978	Kauai	Wild grassland	Partially Obstructed	no	NA	NA	NA	27.9	29.5	66.1	29.777777777777775	248.1283186	2017-08-10	14:03:00	NA	NA	https://storage.googleapis.com/elegansvariation.org/photos/hawaii2017/C-0914.thumb.jpg	Leaf litter
NA	NA	C-0914	S-05743	Yes	Few (4-10)	22.088439	-159.392978	Kauai	Wild grassland	Partially Obstructed	no	NA	NA	NA	27.9	29.5	66.1	29.777777777777775	248.1283186	2017-08-10	14:03:00	NA	NA	https://storage.googleapis.com/elegansvariation.org/photos/hawaii2017/C-0914.thumb.jpg	Leaf litter
NA	NA	C-0915	NA	No	NA	22.194933	-159.478189	Kauai	Wild forest	Obstructed	no	NA	NA	NA	24.1	44.5	84.2	24.94444444444445	188.9825784	2017-08-10	09:40:00	NA	NA	https://storage.googleapis.com/elegansvariation.org/photos/hawaii2017/C-0915.thumb.jpg	Fruit
NA	NA	C-0916	S-05910	Yes	Proliferating (25+)	22.197636	-159.477386	Kauai	Wild forest	Partially Obstructed	no	NA	NA	NA	24.3	28	81.4	25.666666666666668	170.7304348	2017-08-10	09:26:00	0	Unknown	https://storage.googleapis.com/elegansvariation.org/photos/hawaii2017/C-0916.thumb.jpg	Leaf litter
NA	NA	C-0916	S-05916	Yes	Proliferating (25+)	22.197636	-159.477386	Kauai	Wild forest	Partially Obstructed	no	NA	NA	NA	24.3	28	81.4	25.666666666666668	170.7304348	2017-08-10	09:26:00	0	Unknown	https://storage.googleapis.com/elegansvariation.org/photos/hawaii2017/C-0916.thumb.jpg	Leaf litter
NA	NA	C-0917	S-06758	Yes	Few (4-10)	20.782702	-156.021613	Maui	Wild forest	Partially Obstructed	no	NA	NA	NA	25	67	78.5	26.3	100	2017-08-15	09:38:00	NA	NA	https://storage.googleapis.com/elegansvariation.org/photos/hawaii2017/C-0917.thumb.jpg	Leaf litter
NA	NA	C-0917	S-06759	Yes	Few (4-10)	20.782702	-156.021613	Maui	Wild forest	Partially Obstructed	no	NA	NA	NA	25	67	78.5	26.3	100	2017-08-15	09:38:00	NA	NA	https://storage.googleapis.com/elegansvariation.org/photos/hawaii2017/C-0917.thumb.jpg	Leaf litter
NA	NA	C-0918	NA	No	NA	22.087308	-159.392233	Kauai	Wild grassland	Partially Obstructed	no	NA	NA	NA	24.7	44.5	63.6	29.111111111111114	239.1504425	2017-08-10	14:08:00	NA	NA	https://storage.googleapis.com/elegansvariation.org/photos/hawaii2017/C-0918.thumb.jpg	Leaf litter
NA	NA	C-0919	S-05747	Yes	Some (11-25)	22.194631	-159.478489	Kauai	Wild forest	Partially Obstructed	no	NA	NA	NA	24.5	NA	83.9	24.277777777777782	192.3876652	2017-08-10	09:43:00	NA	NA	https://storage.googleapis.com/elegansvariation.org/photos/hawaii2017/C-0919.thumb.jpg	Vegetation
NA	NA	C-0919	S-05758	Yes	Some (11-25)	22.194631	-159.478489	Kauai	Wild forest	Partially Obstructed	no	NA	NA	NA	24.5	NA	83.9	24.277777777777782	192.3876652	2017-08-10	09:43:00	0	Unknown	https://storage.googleapis.com/elegansvariation.org/photos/hawaii2017/C-0919.thumb.jpg	Vegetation
NA	NA	C-0921	S-05784	Yes	Proliferating (25+)	22.194403	-159.478553	Kauai	Wild forest	Partially Obstructed	yes	11	B	2	23.3	66	78.5	25.666666666666668	198.68	2017-08-10	11:33:00	1	C. briggsae	https://storage.googleapis.com/elegansvariation.org/photos/hawaii2017/C-0921.thumb.jpg	Leaf litter
NA	NA	C-0921	S-05785	Yes	Proliferating (25+)	22.194403	-159.478553	Kauai	Wild forest	Partially Obstructed	yes	11	B	2	23.3	66	78.5	25.666666666666668	198.68	2017-08-10	11:33:00	1	C. briggsae	https://storage.googleapis.com/elegansvariation.org/photos/hawaii2017/C-0921.thumb.jpg	Leaf litter
NA	NA	C-0922	S-05789	Yes	Proliferating (25+)	22.086658	-159.391661	Kauai	Wild grassland	Partially Obstructed	no	NA	NA	NA	24.9	65	63.6	29.111111111111114	234.7854077	2017-08-10	14:10:00	0	Unknown	https://storage.googleapis.com/elegansvariation.org/photos/hawaii2017/C-0922.thumb.jpg	Leaf litter
NA	NA	C-0922	S-05790	Yes	Proliferating (25+)	22.086658	-159.391661	Kauai	Wild grassland	Partially Obstructed	no	NA	NA	NA	24.9	65	63.6	29.111111111111114	234.7854077	2017-08-10	14:10:00	0	Unknown	https://storage.googleapis.com/elegansvariation.org/photos/hawaii2017/C-0922.thumb.jpg	Leaf litter
NA	NA	C-0923	S-05918	Yes	Proliferating (25+)	22.194578	-159.478478	Kauai	Wild forest	Partially Obstructed	no	NA	NA	NA	24.5	NA	85.3	24.277777777777782	195.2614379	2017-08-10	09:44:00	1	C. tropicalis	https://storage.googleapis.com/elegansvariation.org/photos/hawaii2017/C-0923.thumb.jpg	Vegetation
NA	NA	C-0923	S-05919	Yes	Proliferating (25+)	22.194578	-159.478478	Kauai	Wild forest	Partially Obstructed	no	NA	NA	NA	24.5	NA	85.3	24.277777777777782	195.2614379	2017-08-10	09:44:00	1	C. tropicalis	https://storage.googleapis.com/elegansvariation.org/photos/hawaii2017/C-0923.thumb.jpg	Vegetation
NA	NA	C-0924	NA	No	NA	22.195114	-159.478072	Kauai	Wild forest	Partially Obstructed	no	NA	NA	NA	24	NA	82.6	24.94444444444445	188.156	2017-08-10	09:37:00	NA	NA	https://storage.googleapis.com/elegansvariation.org/photos/hawaii2017/C-0924.thumb.jpg	Fruit
NA	NA	C-0925	S-05734	Yes	Proliferating (25+)	22.19435	-159.478569	Kauai	Wild forest	Partially Obstructed	yes	11	C	2	22.8	58	72.1	25.666666666666668	200.1666165	2017-08-10	11:35:00	NA	NA	https://storage.googleapis.com/elegansvariation.org/photos/hawaii2017/C-0925.thumb.jpg	Leaf litter
NA	NA	C-0925	S-05735	Yes	Proliferating (25+)	22.19435	-159.478569	Kauai	Wild forest	Partially Obstructed	yes	11	C	2	22.8	58	72.1	25.666666666666668	200.1666165	2017-08-10	11:35:00	NA	NA	https://storage.googleapis.com/elegansvariation.org/photos/hawaii2017/C-0925.thumb.jpg	Leaf litter
NA	NA	C-0926	S-05956	Yes	Proliferating (25+)	22.086197	-159.390886	Kauai	Wild grassland	Partially Obstructed	no	NA	NA	NA	24.6	66	63.9	29.111111111111114	228.7689243	2017-08-10	14:12:00	0	Unknown	https://storage.googleapis.com/elegansvariation.org/photos/hawaii2017/C-0926.thumb.jpg	Leaf litter
NA	NA	C-0926	S-05960	Yes	Proliferating (25+)	22.086197	-159.390886	Kauai	Wild grassland	Partially Obstructed	no	NA	NA	NA	24.6	66	63.9	29.111111111111114	228.7689243	2017-08-10	14:12:00	0	Unknown	https://storage.googleapis.com/elegansvariation.org/photos/hawaii2017/C-0926.thumb.jpg	Leaf litter
NA	NA	C-0927	NA	No	NA	22.194375	-159.478622	Kauai	Wild forest	Obstructed	no	NA	NA	NA	23.9	NA	85.5	24.277777777777782	198.7918367	2017-08-10	09:46:00	NA	NA	https://storage.googleapis.com/elegansvariation.org/photos/hawaii2017/C-0927.thumb.jpg	Vegetation
NA	NA	C-0928	NA	No	NA	22.195386	-159.477989	Kauai	Wild forest	Obstructed	no	NA	NA	NA	23.7	NA	82.7	24.94444444444445	183.9516908	2017-08-10	09:36:00	NA	NA	https://storage.googleapis.com/elegansvariation.org/photos/hawaii2017/C-0928.thumb.jpg	Fruit
NA	NA	C-0929	S-05958	Yes	Proliferating (25+)	22.085408	-159.387944	Kauai	Wild forest	Partially Obstructed	no	NA	NA	NA	24.1	50	68.7	28.388888888888886	208.3816425	2017-08-10	14:23:00	1	C. briggsae	https://storage.googleapis.com/elegansvariation.org/photos/hawaii2017/C-0929.thumb.jpg	Leaf litter
NA	NA	C-0929	S-05959	Yes	Proliferating (25+)	22.085408	-159.387944	Kauai	Wild forest	Partially Obstructed	no	NA	NA	NA	24.1	50	68.7	28.388888888888886	208.3816425	2017-08-10	14:23:00	1	C. briggsae	https://storage.googleapis.com/elegansvariation.org/photos/hawaii2017/C-0929.thumb.jpg	Leaf litter
NA	NA	C-0930	S-05797	Yes	Proliferating (25+)	22.085631	-159.390214	Kauai	Wild grassland	Partially Obstructed	no	NA	NA	NA	27.5	44	68.2	29.777777777777775	225.8447205	2017-08-10	14:14:00	0	Unknown	https://storage.googleapis.com/elegansvariation.org/photos/hawaii2017/C-0930.thumb.jpg	Leaf litter
NA	NA	C-0930	S-05798	Yes	Proliferating (25+)	22.085631	-159.390214	Kauai	Wild grassland	Partially Obstructed	no	NA	NA	NA	27.5	44	68.2	29.777777777777775	225.8447205	2017-08-10	14:14:00	0	Unknown	https://storage.googleapis.com/elegansvariation.org/photos/hawaii2017/C-0930.thumb.jpg	Leaf litter
NA	NA	C-0931	S-06767	Yes	Few (4-10)	20.874611	-156.18645	Maui	Wild forest	Partially Obstructed	yes	15	E	3	22.1	65	78.3	24.9	198.809417	2017-08-15	15:35:00	NA	NA	https://storage.googleapis.com/elegansvariation.org/photos/hawaii2017/C-0931.thumb.jpg	Leaf litter
NA	NA	C-0931	S-06768	Yes	Few (4-10)	20.874611	-156.18645	Maui	Wild forest	Partially Obstructed	yes	15	E	3	22.1	65	78.3	24.9	198.809417	2017-08-15	15:35:00	NA	NA	https://storage.googleapis.com/elegansvariation.org/photos/hawaii2017/C-0931.thumb.jpg	Leaf litter
NA	NA	C-0932	S-05708	Yes	Proliferating (25+)	22.195531	-159.47795	Kauai	Wild forest	Obstructed	no	NA	NA	NA	24	NA	83.2	24.94444444444445	182.5594059	2017-08-10	09:33:00	0	Unknown	https://storage.googleapis.com/elegansvariation.org/photos/hawaii2017/C-0932.thumb.jpg	Fungus
NA	NA	C-0932	S-05712	Yes	Proliferating (25+)	22.195531	-159.47795	Kauai	Wild forest	Obstructed	no	NA	NA	NA	24	NA	83.2	24.94444444444445	182.5594059	2017-08-10	09:33:00	0	Unknown	https://storage.googleapis.com/elegansvariation.org/photos/hawaii2017/C-0932.thumb.jpg	Fungus
NA	NA	C-0932	S-05716	Yes	Proliferating (25+)	22.195531	-159.47795	Kauai	Wild forest	Obstructed	no	NA	NA	NA	24	NA	83.2	24.94444444444445	182.5594059	2017-08-10	09:33:00	0	Unknown	https://storage.googleapis.com/elegansvariation.org/photos/hawaii2017/C-0932.thumb.jpg	Fungus
NA	NA	C-0933	S-05729	Yes	Few (4-10)	22.194333	-159.478628	Kauai	Wild forest	Partially Obstructed	yes	11	E	2	23.6	53	77.1	25.666666666666668	200.1533333	2017-08-10	11:39:00	NA	NA	https://storage.googleapis.com/elegansvariation.org/photos/hawaii2017/C-0933.thumb.jpg	Leaf litter
NA	NA	C-0934	NA	No	NA	22.085567	-159.389825	Kauai	Wild grassland	Partially Obstructed	no	NA	NA	NA	25.6	54	67.5	29.777777777777775	223.4623656	2017-08-10	14:16:00	NA	NA	https://storage.googleapis.com/elegansvariation.org/photos/hawaii2017/C-0934.thumb.jpg	Leaf litter
NA	NA	C-0935	S-05703	Yes	Proliferating (25+)	22.085358	-159.387978	Kauai	Wild forest	Partially Obstructed	no	NA	NA	NA	24.1	NA	68.2	28.388888888888886	209.9708738	2017-08-10	14:24:00	1	C. briggsae	https://storage.googleapis.com/elegansvariation.org/photos/hawaii2017/C-0935.thumb.jpg	Leaf litter
NA	NA	C-0935	S-05707	Yes	Proliferating (25+)	22.085358	-159.387978	Kauai	Wild forest	Partially Obstructed	no	NA	NA	NA	24.1	NA	68.2	28.388888888888886	209.9708738	2017-08-10	14:24:00	1	C. briggsae	https://storage.googleapis.com/elegansvariation.org/photos/hawaii2017/C-0935.thumb.jpg	Leaf litter
NA	NA	C-0935	S-05720	Yes	Proliferating (25+)	22.085358	-159.387978	Kauai	Wild forest	Partially Obstructed	no	NA	NA	NA	24.1	NA	68.2	28.388888888888886	209.9708738	2017-08-10	14:24:00	1	C. briggsae	https://storage.googleapis.com/elegansvariation.org/photos/hawaii2017/C-0935.thumb.jpg	Leaf litter
NA	NA	C-0936	S-05913	Yes	Proliferating (25+)	22.185811	-159.479692	Kauai	Wild forest	Obstructed	no	NA	NA	NA	24.5	26.5	85.4	26.33333333333334	361.7613169	2017-08-10	10:36:00	1	Oscheius sp.	https://storage.googleapis.com/elegansvariation.org/photos/hawaii2017/C-0936.thumb.jpg	Leaf litter
NA	NA	C-0936	S-05930	Yes	Proliferating (25+)	22.185811	-159.479692	Kauai	Wild forest	Obstructed	no	NA	NA	NA	24.5	26.5	85.4	26.33333333333334	361.7613169	2017-08-10	10:36:00	1	Oscheius sp.	https://storage.googleapis.com/elegansvariation.org/photos/hawaii2017/C-0936.thumb.jpg	Leaf litter
NA	NA	C-0937	S-05738	Yes	Proliferating (25+)	22.194325	-159.478633	Kauai	Wild forest	Partially Obstructed	yes	11	A	0	22.5	60.5	76.1	25.666666666666668	198.8688525	2017-08-10	11:40:00	NA	NA	https://storage.googleapis.com/elegansvariation.org/photos/hawaii2017/C-0937.thumb.jpg	Leaf litter
NA	NA	C-0937	S-05739	Yes	Proliferating (25+)	22.194325	-159.478633	Kauai	Wild forest	Partially Obstructed	yes	11	A	0	22.5	60.5	76.1	25.666666666666668	198.8688525	2017-08-10	11:40:00	0	Unknown	https://storage.googleapis.com/elegansvariation.org/photos/hawaii2017/C-0937.thumb.jpg	Leaf litter
NA	NA	C-0938	NA	No	NA	22.085575	-159.389706	Kauai	Wild grassland	Full	no	NA	NA	NA	NA	NA	62.4	29.777777777777775	222.3676471	2017-08-10	14:17:00	NA	NA	https://storage.googleapis.com/elegansvariation.org/photos/hawaii2017/C-0938.thumb.jpg	Fruit
NA	NA	C-0939	S-06724	Yes	Few (4-10)	20.79521364	-156.0758536	Maui	Wild forest	Partially Obstructed	yes	15	A	2	22.4	64	73.1	25.6	337	2017-08-15	15:25:00	0	Unknown	https://storage.googleapis.com/elegansvariation.org/photos/hawaii2017/C-0939.thumb.jpg	Leaf litter
NA	NA	C-0940	NA	Tracks	NA	22.197208	-159.477658	Kauai	Wild forest	Partially Obstructed	no	NA	NA	NA	24	48.5	82.7	25.666666666666668	171.6242038	2017-08-10	09:28:00	NA	NA	https://storage.googleapis.com/elegansvariation.org/photos/hawaii2017/C-0940.thumb.jpg	Leaf litter
NA	NA	C-0941	NA	No	NA	22.084078	-159.385944	Kauai	Wild grassland	Partially Obstructed	no	NA	NA	NA	25.9	NA	59.4	30.444444444444443	198.2101449	2017-08-10	13:45:00	NA	NA	https://storage.googleapis.com/elegansvariation.org/photos/hawaii2017/C-0941.thumb.jpg	Flower
NA	NA	C-0942	S-05940	Yes	Proliferating (25+)	22.085553	-159.389292	Kauai	Wild grassland	Partially Obstructed	no	NA	NA	NA	27	38	65.7	30.444444444444443	217.5977011	2017-08-10	14:18:00	0	Unknown	https://storage.googleapis.com/elegansvariation.org/photos/hawaii2017/C-0942.thumb.jpg	Leaf litter
NA	NA	C-0942	S-05941	Yes	Proliferating (25+)	22.085553	-159.389292	Kauai	Wild grassland	Partially Obstructed	no	NA	NA	NA	27	38	65.7	30.444444444444443	217.5977011	2017-08-10	14:18:00	NA	NA	https://storage.googleapis.com/elegansvariation.org/photos/hawaii2017/C-0942.thumb.jpg	Leaf litter
NA	NA	C-0943	NA	No	NA	20.874647	-156.186294	Maui	Wild forest	Partially Obstructed	yes	15	B	3	21.7	59.5	75.1	25.6	191.689441	2017-08-15	15:27:00	NA	NA	https://storage.googleapis.com/elegansvariation.org/photos/hawaii2017/C-0943.thumb.jpg	Leaf litter
NA	NA	C-0944	NA	Tracks	NA	20.6734	-156.332683	Maui	Wild forest	Partially Obstructed	no	NA	NA	NA	12.1	55.5	86.7	15.5	1936.061538	2017-08-14	09:30:00	NA	NA	https://storage.googleapis.com/elegansvariation.org/photos/hawaii2017/C-0944.thumb.jpg	Leaf litter
NA	NA	C-0945	S-05791	Yes	Proliferating (25+)	22.085269	-159.387539	Kauai	Wild grassland	Obstructed	no	NA	NA	NA	25.2	62	60	29.777777777777775	208.7727273	2017-08-10	13:48:00	0	Unknown	https://storage.googleapis.com/elegansvariation.org/photos/hawaii2017/C-0945.thumb.jpg	Leaf litter
NA	NA	C-0945	S-05792	Yes	Proliferating (25+)	22.085269	-159.387539	Kauai	Wild grassland	Obstructed	no	NA	NA	NA	25.2	62	60	29.777777777777775	208.7727273	2017-08-10	13:48:00	0	Unknown	https://storage.googleapis.com/elegansvariation.org/photos/hawaii2017/C-0945.thumb.jpg	Leaf litter
NA	NA	C-0946	S-05773	Yes	Very Few (1-3)	22.085494	-159.388664	Kauai	Wild grassland	Partially Obstructed	no	NA	NA	NA	25.7	65.5	75.7	27.722222222222225	212.0986842	2017-08-10	14:20:00	NA	NA	https://storage.googleapis.com/elegansvariation.org/photos/hawaii2017/C-0946.thumb.jpg	Leaf litter
NA	NA	C-0947	NA	Tracks	NA	20.874608	-156.186233	Maui	Wild forest	Partially Obstructed	yes	15	C	3	21.3	67	75.6	25.6	193.8323699	2017-08-15	15:30:00	NA	NA	https://storage.googleapis.com/elegansvariation.org/photos/hawaii2017/C-0947.thumb.jpg	Leaf litter
NA	NA	C-0948	S-06576	Yes	Very Few (1-3)	20.673317	-156.332644	Maui	Wild forest	Partially Obstructed	no	NA	NA	NA	12.6	67.5	83.3	17.1	1937.21875	2017-08-14	09:33:00	NA	NA	https://storage.googleapis.com/elegansvariation.org/photos/hawaii2017/C-0948.thumb.jpg	Fungus
NA	NA	C-0949	S-05772	Yes	Proliferating (25+)	22.085392	-159.387939	Kauai	Wild grassland	Partially Obstructed	no	NA	NA	NA	25.2	NA	62.9	29.777777777777775	208.7173913	2017-08-10	13:49:00	1	C. briggsae	https://storage.googleapis.com/elegansvariation.org/photos/hawaii2017/C-0949.thumb.jpg	Flower
NA	NA	C-0949	S-05781	Yes	Proliferating (25+)	22.085392	-159.387939	Kauai	Wild grassland	Partially Obstructed	no	NA	NA	NA	25.2	NA	62.9	29.777777777777775	208.7173913	2017-08-10	13:49:00	1	C. briggsae	https://storage.googleapis.com/elegansvariation.org/photos/hawaii2017/C-0949.thumb.jpg	Flower
NA	NA	C-0950	S-05801	Yes	Proliferating (25+)	22.194369	-159.478586	Kauai	Wild forest	Partially Obstructed	yes	11	E	1	23.2	56	76.3	25.666666666666668	199.1995927	2017-08-10	11:38:00	0	Unknown	https://storage.googleapis.com/elegansvariation.org/photos/hawaii2017/C-0950.thumb.jpg	Leaf litter
NA	NA	C-0950	S-05802	Yes	Proliferating (25+)	22.194369	-159.478586	Kauai	Wild forest	Partially Obstructed	yes	11	E	1	23.2	56	76.3	25.666666666666668	199.1995927	2017-08-10	11:38:00	0	Unknown	https://storage.googleapis.com/elegansvariation.org/photos/hawaii2017/C-0950.thumb.jpg	Leaf litter
NA	NA	C-0951	NA	No	NA	20.874606	-156.186331	Maui	Wild forest	Partially Obstructed	yes	15	D	3	22	NA	77.4	24.9	195.4590909	2017-08-15	15:32:00	NA	NA	https://storage.googleapis.com/elegansvariation.org/photos/hawaii2017/C-0951.thumb.jpg	Fungus
NA	NA	C-0952	NA	Tracks	NA	20.672069	-156.332628	Maui	Wild forest	Partially Obstructed	no	NA	NA	NA	14.3	65.5	90.6	15.7	1958.567568	2017-08-14	09:35:00	NA	NA	https://storage.googleapis.com/elegansvariation.org/photos/hawaii2017/C-0952.thumb.jpg	Fruit
NA	NA	C-0953	NA	No	NA	22.085408	-159.388061	Kauai	Wild grassland	Partially Obstructed	no	NA	NA	NA	27.5	NA	64.8	29.777777777777775	208.7760417	2017-08-10	13:50:00	NA	NA	https://storage.googleapis.com/elegansvariation.org/photos/hawaii2017/C-0953.thumb.jpg	Flower
NA	NA	C-0954	S-05701	Yes	Proliferating (25+)	22.194394	-159.478606	Kauai	Wild forest	Partially Obstructed	yes	11	D	2	23	62	76.1	25.666666666666668	198.6987179	2017-08-10	11:37:00	0	Unknown	https://storage.googleapis.com/elegansvariation.org/photos/hawaii2017/C-0954.thumb.jpg	Leaf litter
NA	NA	C-0954	S-05705	Yes	Proliferating (25+)	22.194394	-159.478606	Kauai	Wild forest	Partially Obstructed	yes	11	D	2	23	62	76.1	25.666666666666668	198.6987179	2017-08-10	11:37:00	NA	NA	https://storage.googleapis.com/elegansvariation.org/photos/hawaii2017/C-0954.thumb.jpg	Leaf litter
NA	NA	C-0955	NA	No	NA	20.874619	-156.186486	Maui	Wild forest	Partially Obstructed	yes	15	F	3	22.3	24	81.1	24.3	196.4834437	2017-08-15	15:37:00	NA	NA	https://storage.googleapis.com/elegansvariation.org/photos/hawaii2017/C-0955.thumb.jpg	Fruit
NA	NA	C-0956	NA	Tracks	NA	20.673917	-156.333225	Maui	Wild forest	Partially Obstructed	no	NA	NA	NA	11.9	68	83.3	16.4	1944.679612	2017-08-14	09:25:00	NA	NA	https://storage.googleapis.com/elegansvariation.org/photos/hawaii2017/C-0956.thumb.jpg	Leaf litter
NA	NA	C-0957	S-05770	Yes	Proliferating (25+)	22.085628	-159.390156	Kauai	Wild grassland	Partially Obstructed	no	NA	NA	NA	27.5	64	62.7	31.166666666666664	225.4597156	2017-08-10	13:54:00	1	C. briggsae	https://storage.googleapis.com/elegansvariation.org/photos/hawaii2017/C-0957.thumb.jpg	Leaf litter
NA	NA	C-0957	S-05771	Yes	Proliferating (25+)	22.085628	-159.390156	Kauai	Wild grassland	Partially Obstructed	no	NA	NA	NA	27.5	64	62.7	31.166666666666664	225.4597156	2017-08-10	13:54:00	0	Unknown	https://storage.googleapis.com/elegansvariation.org/photos/hawaii2017/C-0957.thumb.jpg	Leaf litter
NA	NA	C-0958	S-05741	Yes	Very Few (1-3)	22.194383	-159.478608	Kauai	Wild forest	Partially Obstructed	yes	11	D	1	23.2	59	75.6	25.666666666666668	198.9180328	2017-08-10	11:36:00	1	C. briggsae	https://storage.googleapis.com/elegansvariation.org/photos/hawaii2017/C-0958.thumb.jpg	Leaf litter
NA	NA	C-0959	S-06776	Yes	Few (4-10)	20.874981	-156.186153	Maui	Wild forest	Partially Obstructed	yes	15	A	3	22	46	73.1	25.6	195.9987484	2017-08-15	15:25:00	NA	NA	https://storage.googleapis.com/elegansvariation.org/photos/hawaii2017/C-0959.thumb.jpg	Leaf litter
NA	NA	C-0959	S-06777	Yes	Few (4-10)	20.874981	-156.186153	Maui	Wild forest	Partially Obstructed	yes	15	A	3	22	46	73.1	25.6	195.9987484	2017-08-15	15:25:00	NA	NA	https://storage.googleapis.com/elegansvariation.org/photos/hawaii2017/C-0959.thumb.jpg	Leaf litter
NA	NA	C-0959	S-06785	Yes	Few (4-10)	20.874981	-156.186153	Maui	Wild forest	Partially Obstructed	yes	15	A	3	22	46	73.1	25.6	195.9987484	2017-08-15	15:25:00	NA	NA	https://storage.googleapis.com/elegansvariation.org/photos/hawaii2017/C-0959.thumb.jpg	Leaf litter
NA	NA	C-0960	NA	Tracks	NA	20.673633	-156.332928	Maui	Wild forest	Partially Obstructed	no	NA	NA	NA	11.3	61.5	86.7	15.7	1932.671875	2017-08-14	09:28:00	NA	NA	https://storage.googleapis.com/elegansvariation.org/photos/hawaii2017/C-0960.thumb.jpg	Leaf litter
NA	NA	C-0961	NA	No	NA	22.1308186	-159.6600271	Kauai	Wild forest	Obstructed	no	NA	NA	NA	17.5	54	64.1	22.6	1145	2017-08-10	11:04:00	NA	NA	https://storage.googleapis.com/elegansvariation.org/photos/hawaii2017/C-0961.thumb.jpg	Leaf litter
NA	NA	C-0962	NA	No	NA	22.129733	-159.660159	Kauai	Wild forest	Partially Obstructed	no	NA	NA	NA	18.2	52	63.1	22.6	1132	2017-08-10	10:58:00	NA	NA	https://storage.googleapis.com/elegansvariation.org/photos/hawaii2017/C-0962.thumb.jpg	Leaf litter
NA	NA	C-0963	NA	No	NA	22.086778	-159.391692	Kauai	Wild forest	Partially Obstructed	no	NA	NA	NA	23.5	50	66.1	28.8	224.0805369	2017-08-10	13:58:00	NA	NA	https://storage.googleapis.com/elegansvariation.org/photos/hawaii2017/C-0963.thumb.jpg	Leaf litter
NA	NA	C-0964	S-05736	Yes	Proliferating (25+)	22.193694	-159.478775	Kauai	Wild forest	Partially Obstructed	no	NA	NA	NA	23.3	42.5	79.6	25.666666666666668	201.8410853	2017-08-10	09:50:00	1	C. briggsae	https://storage.googleapis.com/elegansvariation.org/photos/hawaii2017/C-0964.thumb.jpg	Leaf litter
NA	NA	C-0964	S-05737	Yes	Proliferating (25+)	22.193694	-159.478775	Kauai	Wild forest	Partially Obstructed	no	NA	NA	NA	23.3	42.5	79.6	25.666666666666668	201.8410853	2017-08-10	09:50:00	1	C. briggsae	https://storage.googleapis.com/elegansvariation.org/photos/hawaii2017/C-0964.thumb.jpg	Leaf litter
NA	NA	C-0965	NA	No	NA	22.131499	-159.660442	Kauai	Wild forest	Obstructed	yes	10	A	2	19.5	62.5	62.2	24	1157	2017-08-10	11:14:00	NA	NA	https://storage.googleapis.com/elegansvariation.org/photos/hawaii2017/C-0965.thumb.jpg	Leaf litter
NA	NA	C-0966	S-05753	Yes	Proliferating (25+)	22.122058	-159.690431	Kauai	Wild forest	Partially Obstructed	no	NA	NA	NA	21.2	41.5	68.2	23.3	880.3348416	2017-08-10	09:20:00	0	Unknown	https://storage.googleapis.com/elegansvariation.org/photos/hawaii2017/C-0966.thumb.jpg	Leaf litter
NA	NA	C-0966	S-05754	Yes	Proliferating (25+)	22.122058	-159.690431	Kauai	Wild forest	Partially Obstructed	no	NA	NA	NA	21.2	41.5	68.2	23.3	880.3348416	2017-08-10	09:20:00	0	Unknown	https://storage.googleapis.com/elegansvariation.org/photos/hawaii2017/C-0966.thumb.jpg	Leaf litter
NA	NA	C-0967	NA	No	NA	22.085392	-159.387828	Kauai	Wild forest	Partially Obstructed	no	NA	NA	NA	25.6	65.5	69.6	28.6	193.3789954	2017-08-10	14:19:00	NA	NA	https://storage.googleapis.com/elegansvariation.org/photos/hawaii2017/C-0967.thumb.jpg	Invertebrate
NA	NA	C-0968	NA	No	NA	22.193453	-159.478881	Kauai	Wild forest	Partially Obstructed	no	NA	NA	NA	23.7	NA	81.5	24.94444444444445	212.5881007	2017-08-10	09:52:00	NA	NA	https://storage.googleapis.com/elegansvariation.org/photos/hawaii2017/C-0968.thumb.jpg	Fungus
NA	NA	C-0969	NA	No	NA	22.131234	-159.660256	Kauai	Wild forest	Obstructed	no	NA	NA	NA	17.9	59	60.3	23.3	1145	2017-08-10	11:07:00	NA	NA	https://storage.googleapis.com/elegansvariation.org/photos/hawaii2017/C-0969.thumb.jpg	Leaf litter
NA	NA	C-0970	NA	No	NA	22.131623	-159.660546	Kauai	Wild forest	Partially Obstructed	yes	10	E	2	22.5	24.5	60.5	23.3	1157	2017-08-10	11:25:00	NA	NA	https://storage.googleapis.com/elegansvariation.org/photos/hawaii2017/C-0970.thumb.jpg	Leaf litter
NA	NA	C-0971	S-05864	Yes	Very Few (1-3)	22.069317	-159.663178	Kauai	Wild forest	Partially Obstructed	no	NA	NA	NA	21.4	44.5	68.8	23.3	977.8445946	2017-08-11	13:40:00	NA	NA	https://storage.googleapis.com/elegansvariation.org/photos/hawaii2017/C-0971.thumb.jpg	Leaf litter
NA	NA	C-0971	S-05865	Yes	Very Few (1-3)	22.069317	-159.663178	Kauai	Wild forest	Partially Obstructed	no	NA	NA	NA	21.4	44.5	68.8	23.3	977.8445946	2017-08-11	13:40:00	NA	NA	https://storage.googleapis.com/elegansvariation.org/photos/hawaii2017/C-0971.thumb.jpg	Leaf litter
NA	NA	C-0972	NA	No	NA	22.193228	-159.478961	Kauai	Wild forest	Partially Obstructed	no	NA	NA	NA	22.2	NA	82.9	24.94444444444445	222.6086702	2017-08-10	09:53:00	NA	NA	https://storage.googleapis.com/elegansvariation.org/photos/hawaii2017/C-0972.thumb.jpg	Fruit
NA	NA	C-0973	S-05780	Yes	Proliferating (25+)	22.118553	-159.681722	Kauai	Wild forest	Partially Obstructed	no	NA	NA	NA	18.8	62.5	63.8	23.3	979.2142857	2017-08-10	08:58:00	0	Unknown	https://storage.googleapis.com/elegansvariation.org/photos/hawaii2017/C-0973.thumb.jpg	Leaf litter
NA	NA	C-0973	S-05841	Yes	Proliferating (25+)	22.118553	-159.681722	Kauai	Wild forest	Partially Obstructed	no	NA	NA	NA	18.8	62.5	63.8	23.3	979.2142857	2017-08-10	08:58:00	0	Unknown	https://storage.googleapis.com/elegansvariation.org/photos/hawaii2017/C-0973.thumb.jpg	Leaf litter
NA	NA	C-0974	NA	No	NA	22.117714	-159.678803	Kauai	Wild forest	Partially Obstructed	no	NA	NA	NA	18.9	21	71.1	21.9	1011.541985	2017-08-10	08:52:00	NA	NA	https://storage.googleapis.com/elegansvariation.org/photos/hawaii2017/C-0974.thumb.jpg	Fruit
NA	NA	C-0975	NA	No	NA	21.950083	-159.363089	Kauai	Rural garden	Obstructed	no	NA	NA	NA	25.9	32	66.7	28.8	14.87160494	2017-08-10	20:17:00	NA	NA	https://storage.googleapis.com/elegansvariation.org/photos/hawaii2017/C-0975.thumb.jpg	Vegetation
NA	NA	C-0976	S-05761	Yes	Proliferating (25+)	22.192964	-159.478986	Kauai	Wild forest	Partially Obstructed	no	NA	NA	NA	22.9	54	81.2	24.94444444444445	228.8180816	2017-08-10	09:55:00	1	Oscheius sp.	https://storage.googleapis.com/elegansvariation.org/photos/hawaii2017/C-0976.thumb.jpg	Leaf litter
NA	NA	C-0976	S-05762	Yes	Proliferating (25+)	22.192964	-159.478986	Kauai	Wild forest	Partially Obstructed	no	NA	NA	NA	22.9	54	81.2	24.94444444444445	228.8180816	2017-08-10	09:55:00	NA	NA	https://storage.googleapis.com/elegansvariation.org/photos/hawaii2017/C-0976.thumb.jpg	Leaf litter
NA	NA	C-0977	NA	No	NA	22.1315326	-159.6604194	Kauai	Wild forest	Partially Obstructed	yes	10	B	2	19.5	62.5	60.3	24	1157	2017-08-10	11:17:00	NA	NA	https://storage.googleapis.com/elegansvariation.org/photos/hawaii2017/C-0977.thumb.jpg	Leaf litter
NA	NA	C-0978	NA	No	NA	22.131663	-159.660501	Kauai	Wild forest	Partially Obstructed	yes	10	F	2	17.8	69	63	22.6	1157	2017-08-10	11:28:00	NA	NA	https://storage.googleapis.com/elegansvariation.org/photos/hawaii2017/C-0978.thumb.jpg	Leaf litter
NA	NA	C-0979	NA	No	NA	22.12015	-159.665856	Kauai	Wild forest	Partially Obstructed	no	NA	NA	NA	21.3	33	71.6	24	1122.43	2017-08-11	13:58:00	NA	NA	https://storage.googleapis.com/elegansvariation.org/photos/hawaii2017/C-0979.thumb.jpg	Leaf litter
NA	NA	C-0980	S-05655	Yes	Few (4-10)	22.192867	-159.479011	Kauai	Wild forest	Partially Obstructed	no	NA	NA	NA	24.2	NA	81.4	25.666666666666668	236.4981273	2017-08-10	09:57:00	0	Unknown	https://storage.googleapis.com/elegansvariation.org/photos/hawaii2017/C-0980.thumb.jpg	Vegetation
NA	NA	C-0980	S-05659	Yes	Few (4-10)	22.192867	-159.479011	Kauai	Wild forest	Partially Obstructed	no	NA	NA	NA	24.2	NA	81.4	25.666666666666668	236.4981273	2017-08-10	09:57:00	0	Unknown	https://storage.googleapis.com/elegansvariation.org/photos/hawaii2017/C-0980.thumb.jpg	Vegetation
NA	NA	C-0981	NA	No	NA	22.131536	-159.660422	Kauai	Wild forest	Partially Obstructed	yes	10	C	2	19.7	26	64.3	23.3	1157	2017-08-10	11:20:00	NA	NA	https://storage.googleapis.com/elegansvariation.org/photos/hawaii2017/C-0981.thumb.jpg	Leaf litter
NA	NA	C-0982	S-05954	Yes	Proliferating (25+)	22.194408	-159.4786	Kauai	Wild forest	Partially Obstructed	yes	11	A	3	23.5	43	79	26.5	191.8259494	2017-08-10	11:31:00	1	C. briggsae	https://storage.googleapis.com/elegansvariation.org/photos/hawaii2017/C-0982.thumb.jpg	Leaf litter
NA	NA	C-0982	S-05957	Yes	Proliferating (25+)	22.194408	-159.4786	Kauai	Wild forest	Partially Obstructed	yes	11	A	3	23.5	43	79	26.5	191.8259494	2017-08-10	11:31:00	1	C. briggsae	https://storage.googleapis.com/elegansvariation.org/photos/hawaii2017/C-0982.thumb.jpg	Leaf litter
NA	NA	C-0983	S-05898	Yes	Very Few (1-3)	22.098633	-159.676703	Kauai	Wild forest	Partially Obstructed	no	NA	NA	NA	20.5	61	69.6	23.3	1053.824742	2017-08-11	13:47:00	0	Unknown	https://storage.googleapis.com/elegansvariation.org/photos/hawaii2017/C-0983.thumb.jpg	Leaf litter
NA	NA	C-0983	S-05899	Yes	Very Few (1-3)	22.098633	-159.676703	Kauai	Wild forest	Partially Obstructed	no	NA	NA	NA	20.5	61	69.6	23.3	1053.824742	2017-08-11	13:47:00	NA	NA	https://storage.googleapis.com/elegansvariation.org/photos/hawaii2017/C-0983.thumb.jpg	Leaf litter
NA	NA	C-0984	NA	No	NA	22.192736	-159.478858	Kauai	Wild forest	Partially Obstructed	no	NA	NA	NA	24.1	NA	80.3	25.666666666666668	238.0891473	2017-08-10	09:58:00	NA	NA	https://storage.googleapis.com/elegansvariation.org/photos/hawaii2017/C-0984.thumb.jpg	Fruit
NA	NA	C-0985	NA	No	NA	22.119683	-159.686211	Kauai	Wild forest	Partially Obstructed	no	NA	NA	NA	21.2	21	75.3	21.2	937.7645051	2017-08-10	09:13:00	NA	NA	https://storage.googleapis.com/elegansvariation.org/photos/hawaii2017/C-0985.thumb.jpg	Fruit
NA	NA	C-0986	S-05759	Yes	Proliferating (25+)	22.194386	-159.478586	Kauai	Wild forest	Partially Obstructed	yes	11	B	3	23.7	65.5	77.9	26	191.2009569	2017-08-10	11:33:00	0	Unknown	https://storage.googleapis.com/elegansvariation.org/photos/hawaii2017/C-0986.thumb.jpg	Leaf litter
NA	NA	C-0986	S-05760	Yes	Proliferating (25+)	22.194386	-159.478586	Kauai	Wild forest	Partially Obstructed	yes	11	B	3	23.7	65.5	77.9	26	191.2009569	2017-08-10	11:33:00	NA	NA	https://storage.googleapis.com/elegansvariation.org/photos/hawaii2017/C-0986.thumb.jpg	Leaf litter
NA	NA	C-0987	NA	No	NA	22.121981	-159.664458	Kauai	Wild forest	Partially Obstructed	yes	12	A	3	18.3	57.5	79.4	21.2	1119.354167	2017-08-11	14:02:00	NA	NA	https://storage.googleapis.com/elegansvariation.org/photos/hawaii2017/C-0987.thumb.jpg	Leaf litter
NA	NA	C-0988	NA	No	NA	22.192642	-159.478753	Kauai	Wild forest	Partially Obstructed	no	NA	NA	NA	23.3	62	80.5	26.33333333333334	240.0595238	2017-08-10	10:00:00	NA	NA	https://storage.googleapis.com/elegansvariation.org/photos/hawaii2017/C-0988.thumb.jpg	Leaf litter
NA	NA	C-0989	S-05794	Yes	Proliferating (25+)	22.053952	-159.367837	Kauai	Wild forest	Partially Obstructed	no	NA	NA	NA	31.8	65.5	58.4	31.5	94	2017-08-10	15:38:00	1	C. tropicalis	https://storage.googleapis.com/elegansvariation.org/photos/hawaii2017/C-0989.thumb.jpg	Fruit
NA	NA	C-0989	S-05795	Yes	Proliferating (25+)	22.053952	-159.367837	Kauai	Wild forest	Partially Obstructed	no	NA	NA	NA	31.8	65.5	58.4	31.5	94	2017-08-10	15:38:00	1	C. tropicalis	https://storage.googleapis.com/elegansvariation.org/photos/hawaii2017/C-0989.thumb.jpg	Fruit
NA	NA	C-0990	S-05920	Yes	Proliferating (25+)	22.194358	-159.478589	Kauai	Wild forest	Obstructed	yes	11	C	3	22.9	68	73.5	26	192.0246305	2017-08-10	11:35:00	0	Unknown	https://storage.googleapis.com/elegansvariation.org/photos/hawaii2017/C-0990.thumb.jpg	Leaf litter
NA	NA	C-0990	S-05922	Yes	Proliferating (25+)	22.194358	-159.478589	Kauai	Wild forest	Obstructed	yes	11	C	3	22.9	68	73.5	26	192.0246305	2017-08-10	11:35:00	0	Unknown	https://storage.googleapis.com/elegansvariation.org/photos/hawaii2017/C-0990.thumb.jpg	Leaf litter
NA	NA	C-0991	X-011	Yes	Very Few (1-3)	22.121917	-159.664394	Kauai	Wild forest	Partially Obstructed	yes	12	F	3	18.8	49	83.3	20.5	1117.138211	2017-08-11	14:09:00	0	Unknown	https://storage.googleapis.com/elegansvariation.org/photos/hawaii2017/C-0991.thumb.jpg	Leaf litter
NA	NA	C-0991	X-012	Yes	Very Few (1-3)	22.121917	-159.664394	Kauai	Wild forest	Partially Obstructed	yes	12	F	3	18.8	49	83.3	20.5	1117.138211	2017-08-11	14:09:00	0	Unknown	https://storage.googleapis.com/elegansvariation.org/photos/hawaii2017/C-0991.thumb.jpg	Leaf litter
NA	NA	C-0992	NA	No	NA	22.192453	-159.478975	Kauai	Wild forest	Partially Obstructed	no	NA	NA	NA	25.2	NA	80.9	25.666666666666668	251.7836538	2017-08-10	10:01:00	NA	NA	https://storage.googleapis.com/elegansvariation.org/photos/hawaii2017/C-0992.thumb.jpg	Fruit
NA	NA	C-0993	NA	No	NA	22.121783	-159.690811	Kauai	Wild forest	Partially Obstructed	no	NA	NA	NA	21.6	72	70.6	22.7	888.9607843	2017-08-10	09:23:00	NA	NA	https://storage.googleapis.com/elegansvariation.org/photos/hawaii2017/C-0993.thumb.jpg	Fruit
NA	NA	C-0994	S-05751	Yes	Proliferating (25+)	22.194444	-159.478561	Kauai	Wild forest	Partially Obstructed	yes	11	D	3	21.7	63	76	26	188.0660066	2017-08-10	11:37:00	NA	NA	https://storage.googleapis.com/elegansvariation.org/photos/hawaii2017/C-0994.thumb.jpg	Leaf litter
NA	NA	C-0994	S-05752	Yes	Proliferating (25+)	22.194444	-159.478561	Kauai	Wild forest	Partially Obstructed	yes	11	D	3	21.7	63	76	26	188.0660066	2017-08-10	11:37:00	1	Oscheius sp.	https://storage.googleapis.com/elegansvariation.org/photos/hawaii2017/C-0994.thumb.jpg	Leaf litter
NA	NA	C-0995	S-05876	Yes	Very Few (1-3)	22.121906	-159.664358	Kauai	Wild forest	Partially Obstructed	yes	12	B	3	18.5	32.5	79.4	21.2	1116.236842	2017-08-11	14:04:00	NA	NA	https://storage.googleapis.com/elegansvariation.org/photos/hawaii2017/C-0995.thumb.jpg	Leaf litter
NA	NA	C-0996	S-05730	Yes	Proliferating (25+)	22.192269	-159.479192	Kauai	Wild forest	Full	no	NA	NA	NA	24.6	37	81	25.666666666666668	261.789644	2017-08-10	10:03:00	0	Unknown	https://storage.googleapis.com/elegansvariation.org/photos/hawaii2017/C-0996.thumb.jpg	Fruit
NA	NA	C-0996	S-05731	Yes	Proliferating (25+)	22.192269	-159.479192	Kauai	Wild forest	Full	no	NA	NA	NA	24.6	37	81	25.666666666666668	261.789644	2017-08-10	10:03:00	0	Unknown	https://storage.googleapis.com/elegansvariation.org/photos/hawaii2017/C-0996.thumb.jpg	Fruit
NA	NA	C-0997	NA	No	NA	22.11847836	-159.681535	Kauai	Wild forest	Partially Obstructed	no	NA	NA	NA	19.3	28	72.5	22.6	984	2017-08-10	08:59:00	NA	NA	https://storage.googleapis.com/elegansvariation.org/photos/hawaii2017/C-0997.thumb.jpg	Fruit
NA	NA	C-0998	S-05656	Yes	Proliferating (25+)	22.085411	-159.387989	Kauai	Wild forest	Partially Obstructed	no	NA	NA	NA	25	NA	63.5	30.2	195.2076271	2017-08-10	13:48:00	NA	NA	https://storage.googleapis.com/elegansvariation.org/photos/hawaii2017/C-0998.thumb.jpg	Flower
NA	NA	C-0998	S-05660	Yes	Proliferating (25+)	22.085411	-159.387989	Kauai	Wild forest	Partially Obstructed	no	NA	NA	NA	25	NA	63.5	30.2	195.2076271	2017-08-10	13:48:00	NA	NA	https://storage.googleapis.com/elegansvariation.org/photos/hawaii2017/C-0998.thumb.jpg	Flower
NA	NA	C-0999	NA	No	NA	22.117697	-159.668039	Kauai	Wild forest	Partially Obstructed	no	NA	NA	NA	21.9	33	76	21.9	1108.986486	2017-08-11	13:51:00	NA	NA	https://storage.googleapis.com/elegansvariation.org/photos/hawaii2017/C-0999.thumb.jpg	Leaf litter
NA	NA	C-1000	S-05787	Yes	Proliferating (25+)	22.194356	-159.478597	Kauai	Wild forest	Partially Obstructed	yes	11	F	1	24.5	49.5	76.6	27.055555555555557	200.0536585	2017-08-10	11:29:00	1	C. briggsae	https://storage.googleapis.com/elegansvariation.org/photos/hawaii2017/C-1000.thumb.jpg	Leaf litter
NA	NA	C-1000	S-05788	Yes	Proliferating (25+)	22.194356	-159.478597	Kauai	Wild forest	Partially Obstructed	yes	11	F	1	24.5	49.5	76.6	27.055555555555557	200.0536585	2017-08-10	11:29:00	1	C. briggsae	https://storage.googleapis.com/elegansvariation.org/photos/hawaii2017/C-1000.thumb.jpg	Leaf litter
NA	NA	C-1001	NA	No	NA	22.119092	-159.68245	Kauai	Wild forest	Partially Obstructed	no	NA	NA	NA	20.3	29	72.5	21.2	980.6820084	2017-08-10	09:05:00	NA	NA	https://storage.googleapis.com/elegansvariation.org/photos/hawaii2017/C-1001.thumb.jpg	Fruit
NA	NA	C-1002	S-05765	Yes	Some (11-25)	22.194392	-159.478603	Kauai	Wild forest	Partially Obstructed	yes	11	E	3	22.8	49	76.9	26	189.630137	2017-08-10	11:39:00	1	C. briggsae	https://storage.googleapis.com/elegansvariation.org/photos/hawaii2017/C-1002.thumb.jpg	Leaf litter
NA	NA	C-1002	S-05766	Yes	Some (11-25)	22.194392	-159.478603	Kauai	Wild forest	Partially Obstructed	yes	11	E	3	22.8	49	76.9	26	189.630137	2017-08-10	11:39:00	1	C. briggsae	https://storage.googleapis.com/elegansvariation.org/photos/hawaii2017/C-1002.thumb.jpg	Leaf litter
NA	NA	C-1003	NA	No	NA	22.121858	-159.664392	Kauai	Wild forest	Partially Obstructed	yes	12	D	3	18.4	55.5	79.1	21.2	1114.929078	2017-08-11	14:06:00	NA	NA	https://storage.googleapis.com/elegansvariation.org/photos/hawaii2017/C-1003.thumb.jpg	Leaf litter
NA	NA	C-1004	S-05763	Yes	Some (11-25)	22.194347	-159.478572	Kauai	Wild forest	Partially Obstructed	yes	11	F	2	24.5	63	77.1	26.33333333333334	200.3820225	2017-08-10	11:30:00	1	C. briggsae	https://storage.googleapis.com/elegansvariation.org/photos/hawaii2017/C-1004.thumb.jpg	Leaf litter
NA	NA	C-1004	S-05764	Yes	Some (11-25)	22.194347	-159.478572	Kauai	Wild forest	Partially Obstructed	yes	11	F	2	24.5	63	77.1	26.33333333333334	200.3820225	2017-08-10	11:30:00	1	C. briggsae	https://storage.googleapis.com/elegansvariation.org/photos/hawaii2017/C-1004.thumb.jpg	Leaf litter
NA	NA	C-1005	NA	No	NA	22.131521	-159.660421	Kauai	Wild forest	Partially Obstructed	yes	10	D	2	19.1	42.5	63.1	23.3	1157	2017-08-10	11:22:00	NA	NA	https://storage.googleapis.com/elegansvariation.org/photos/hawaii2017/C-1005.thumb.jpg	Leaf litter
NA	NA	C-1006	NA	?	NA	22.085186	-159.387586	Kauai	Wild forest	Partially Obstructed	no	NA	NA	NA	22.4	64	67.2	28.8	198.7511962	2017-08-10	14:24:00	NA	NA	https://storage.googleapis.com/elegansvariation.org/photos/hawaii2017/C-1006.thumb.jpg	Leaf litter
NA	NA	C-1007	NA	No	NA	22.121836	-159.664392	Kauai	Wild forest	Partially Obstructed	yes	12	D	2	18.1	62	77.4	21.1	1114.948454	2017-08-11	14:07:00	NA	NA	https://storage.googleapis.com/elegansvariation.org/photos/hawaii2017/C-1007.thumb.jpg	Leaf litter
NA	NA	C-1008	S-05923	Yes	Proliferating (25+)	22.192208	-159.479233	Kauai	Wild forest	Partially Obstructed	no	NA	NA	NA	24.2	NA	76.6	25.666666666666668	258.2128713	2017-08-10	10:05:00	0	Unknown	https://storage.googleapis.com/elegansvariation.org/photos/hawaii2017/C-1008.thumb.jpg	Fungus
NA	NA	C-1008	S-05924	Yes	Proliferating (25+)	22.192208	-159.479233	Kauai	Wild forest	Partially Obstructed	no	NA	NA	NA	24.2	NA	76.6	25.666666666666668	258.2128713	2017-08-10	10:05:00	0	Unknown	https://storage.googleapis.com/elegansvariation.org/photos/hawaii2017/C-1008.thumb.jpg	Fungus
NA	NA	C-1009	NA	No	NA	22.119928	-159.686536	Kauai	Wild forest	Partially Obstructed	no	NA	NA	NA	21.4	26	77.5	21.9	939.7271589	2017-08-10	09:17:00	NA	NA	https://storage.googleapis.com/elegansvariation.org/photos/hawaii2017/C-1009.thumb.jpg	Fruit
NA	NA	C-1010	S-05914	Yes	Proliferating (25+)	22.086169	-159.390764	Kauai	Wild forest	Partially Obstructed	NA	NA	NA	NA	25.2	60	60	31.5	220.7011494	2017-08-10	13:54:00	0	Unknown	https://storage.googleapis.com/elegansvariation.org/photos/hawaii2017/C-1010.thumb.jpg	Leaf litter
NA	NA	C-1010	S-05915	Yes	Proliferating (25+)	22.086169	-159.390764	Kauai	Wild forest	Partially Obstructed	NA	NA	NA	NA	25.2	60	60	31.5	220.7011494	2017-08-10	13:54:00	0	Unknown	https://storage.googleapis.com/elegansvariation.org/photos/hawaii2017/C-1010.thumb.jpg	Leaf litter
NA	NA	C-1011	S-05929	Yes	Very Few (1-3)	22.121856	-159.664408	Kauai	Wild forest	Partially Obstructed	yes	12	E	1	18.8	45	82.3	20.1	1115.131455	2017-08-11	14:08:00	NA	NA	https://storage.googleapis.com/elegansvariation.org/photos/hawaii2017/C-1011.thumb.jpg	Leaf litter
NA	NA	C-1012	S-05724	Yes	Some (11-25)	22.191911	-159.479417	Kauai	Wild forest	Partially Obstructed	no	NA	NA	NA	24.8	64	77.4	25.666666666666668	256.5395189	2017-08-10	10:07:00	0	Unknown	https://storage.googleapis.com/elegansvariation.org/photos/hawaii2017/C-1012.thumb.jpg	Leaf litter
NA	NA	C-1012	S-05726	Yes	Some (11-25)	22.191911	-159.479417	Kauai	Wild forest	Partially Obstructed	no	NA	NA	NA	24.8	64	77.4	25.666666666666668	256.5395189	2017-08-10	10:07:00	0	Unknown	https://storage.googleapis.com/elegansvariation.org/photos/hawaii2017/C-1012.thumb.jpg	Leaf litter
NA	NA	C-1013	NA	No	NA	22.130244	-159.657517	Kauai	Urban garden	Full	no	NA	NA	NA	26.4	62.5	56.6	25.3	1110.430894	2017-08-10	09:50:00	NA	NA	https://storage.googleapis.com/elegansvariation.org/photos/hawaii2017/C-1013.thumb.jpg	Flower
NA	NA	C-1014	NA	No	NA	22.088497	-159.392933	Kauai	Wild forest	Partially Obstructed	no	NA	NA	NA	24.5	52.5	60.3	31.3	234.3277778	2017-08-10	14:04:00	NA	NA	https://storage.googleapis.com/elegansvariation.org/photos/hawaii2017/C-1014.thumb.jpg	Leaf litter
NA	NA	C-1015	NA	No	NA	22.121783	-159.664339	Kauai	Wild forest	Partially Obstructed	yes	12	C	3	19.4	53.5	78.9	21.2	1113.664122	2017-08-11	14:05:00	NA	NA	https://storage.googleapis.com/elegansvariation.org/photos/hawaii2017/C-1015.thumb.jpg	Leaf litter
NA	NA	C-1016	NA	No	NA	22.194364	-159.478614	Kauai	Wild forest	Partially Obstructed	yes	11	A	1	24.3	55	77.5	26.38888888888889	198.7314488	2017-08-10	11:31:00	NA	NA	https://storage.googleapis.com/elegansvariation.org/photos/hawaii2017/C-1016.thumb.jpg	Leaf litter
NA	NA	C-1017	NA	No	NA	22.114223	-159.672346	Kauai	Wild forest	Partially Obstructed	no	NA	NA	NA	19.7	55	59.9	24	1076	2017-08-10	10:21:00	NA	NA	https://storage.googleapis.com/elegansvariation.org/photos/hawaii2017/C-1017.thumb.jpg	Leaf litter
NA	NA	C-1018	S-05927	Yes	Proliferating (25+)	22.085422	-159.387858	Kauai	Wild forest	Partially Obstructed	no	NA	NA	NA	24.6	66	70	28.8	195.5997625	2017-08-10	14:16:00	1	C. briggsae	https://storage.googleapis.com/elegansvariation.org/photos/hawaii2017/C-1018.thumb.jpg	Leaf litter
NA	NA	C-1018	S-05939	Yes	Proliferating (25+)	22.085422	-159.387858	Kauai	Wild forest	Partially Obstructed	no	NA	NA	NA	24.6	66	70	28.8	195.5997625	2017-08-10	14:16:00	NA	NA	https://storage.googleapis.com/elegansvariation.org/photos/hawaii2017/C-1018.thumb.jpg	Leaf litter
NA	NA	C-1019	S-05946	Yes	Proliferating (25+)	22.083342	-159.384628	Kauai	Wild forest	Partially Obstructed	no	NA	NA	NA	24.5	53	69.8	28.8	179.2134831	2017-08-10	14:31:00	0	Unknown	https://storage.googleapis.com/elegansvariation.org/photos/hawaii2017/C-1019.thumb.jpg	Leaf litter
[truncated: 2,160 more rows]
