# Supplementary material for: Deep sampling of Hawaiian Caenorhabditis elegans reveals high genetic diversity and admixture with global populations
Source: eLife journal article supplement (doi:10.7554/elife.50465), 2019-12-03
Supplement: supp [file elife-50465-supp-v1.zip › elife_poa_e50465_Supplementary_data_2.csv]

species	manuscript_names	CeNDR_names	Andersen_lab_names	alternative_names	strain_availability	CeNDR_release
C. elegans	AB1	AB1	AB1		CeNDR	20160408
C. elegans	BRC20067	BRC20067	BRC20067		CeNDR	20160408
C. elegans	BRC20263	BRC20263	BRC20263		CeNDR	20170531
C. elegans	CB4851	ECA243	ECA243	CB4851 (CGC)|CB4851_CGC|CB4851|N62	CeNDR	20160408
C. elegans	CB4852	CB4852	CB4852	N3	CeNDR	20160408
C. elegans	CB4853	ECA246	ECA246	CB4853 (UK)|CB4853_UK|CB4853|GA12	CeNDR	20160408
C. elegans	CB4854	CB4854	CB4854	GA9	CeNDR	20160408
C. elegans	CB4855	ECA248	ECA248	CB4855 (UK)|CB4855_UK|CB4855|Cal-5|Sta-5	CeNDR	20160408
C. elegans	CB4856	CB4856	CB4856	CB4856 (CGC #3)|CB4856_CGC_3|CB4856_CGC|CB4856	CeNDR	20160408
C. elegans	CB4857	ECA250	ECA250	CB4857 (UK)|CB4857_UK|Cl2a	CeNDR	20160408
C. elegans	CB4858	ECA251	ECA251	CB4858 (CGC)|CB4858_CGC|CB4858|PA1	CeNDR	20160408
C. elegans	CB4932	CB4932	CB4932		CeNDR	20160408
C. elegans	CX11254	CX11254	CX11254		CeNDR	20160408
C. elegans	CX11262	CX11262	CX11262		CeNDR	20160408
C. elegans	CX11264	CX11264	CX11264		CeNDR	20160408
C. elegans	CX11271	CX11271	CX11271		CeNDR	20160408
C. elegans	CX11276	CX11276	CX11276		CeNDR	20160408
C. elegans	CX11285	CX11285	CX11285		CeNDR	20160408
C. elegans	CX11292	CX11292	CX11292		CeNDR	20160408
C. elegans	CX11307	CX11307	CX11307		CeNDR	20160408
C. elegans	CX11314	CX11314	CX11314		CeNDR	20160408
C. elegans	CX11315	CX11315	CX11315		CeNDR	20160408
C. elegans	DL200	DL200	DL200		CeNDR	20160408
C. elegans	DL226	DL226	DL226		CeNDR	20160408
C. elegans	DL238	DL238	DL238		CeNDR	20160408
C. elegans	ECA189	ECA189	ECA189		CeNDR	20170531
C. elegans	ECA191	ECA191	ECA191		CeNDR	20170531
C. elegans	ECA252	ECA252	ECA252		CeNDR	20160408
C. elegans	ECA347	ECA347	ECA347		CeNDR	20180413
C. elegans	ECA348	ECA348	ECA348		CeNDR	20170531
C. elegans	ECA349	ECA349	ECA349		CeNDR	20170531
C. elegans	ECA36	ECA36	ECA36		CeNDR	20160408
C. elegans	ECA363	ECA363	ECA363		CeNDR	20170531
C. elegans	ECA369	ECA369	ECA369		CeNDR	20170531
C. elegans	ECA372	ECA372	ECA372		CeNDR	20170531
C. elegans	ECA396	ECA396	ECA396		CeNDR	20170531
C. elegans	ECA701	ECA701	ECA701		CeNDR	20180413
C. elegans	ECA703	ECA703	ECA703		CeNDR	20180413
C. elegans	ECA705	ECA705	ECA705		CeNDR	20180413
C. elegans	ECA706	ECA706	ECA706		CeNDR	20180413
C. elegans	ECA710	ECA710	ECA710		CeNDR	20180413
C. elegans	ECA712	ECA712	ECA712		CeNDR	20180413
C. elegans	ECA722	ECA722	ECA722		CeNDR	20180413
C. elegans	ECA723	ECA723	ECA723		CeNDR	20180413
C. elegans	ECA724	ECA724	ECA724		CeNDR	20180413
C. elegans	ECA730	ECA730	ECA730		CeNDR	20180413
C. elegans	ECA732	ECA732	ECA732		CeNDR	20180413
C. elegans	ECA733	ECA733	ECA733		CeNDR	20180413
C. elegans	ECA738	ECA738	ECA738		CeNDR	20180413
C. elegans	ECA740	ECA740	ECA740		CeNDR	20180413
C. elegans	ECA741	ECA741	ECA741		CeNDR	20180413
C. elegans	ECA742	ECA742	ECA742		CeNDR	20180413
C. elegans	ECA743	ECA743	ECA743		CeNDR	20180413
C. elegans	ECA744	ECA744	ECA744		CeNDR	20180413
C. elegans	ECA745	ECA745	ECA745		CeNDR	20180413
C. elegans	ECA746	ECA746	ECA746		CeNDR	20180413
C. elegans	ECA760	ECA760	ECA760		CeNDR	20180413
C. elegans	ECA768	ECA768	ECA768		CeNDR	20180413
C. elegans	ECA777	ECA777	ECA777		CeNDR	20180413
C. elegans	ECA778	ECA778	ECA778		CeNDR	20180413
C. elegans	ECA807	ECA807	ECA807		CeNDR	20180413
C. elegans	ECA812	ECA812	ECA812		CeNDR	20180413
C. elegans	ED3005	ED3005	ED3005		CeNDR	20160408
C. elegans	ED3011	ED3011	ED3011		CeNDR	20160408
C. elegans	ED3012	ED3012	ED3012		CeNDR	20160408
C. elegans	ED3017	ED3017	ED3017		CeNDR	20160408
C. elegans	ED3040	ED3040	ED3040		CeNDR	20160408
C. elegans	ED3046	ED3046	ED3046		CeNDR	20160408
C. elegans	ED3048	ED3048	ED3048		CeNDR	20160408
C. elegans	ED3049	ED3049	ED3049		CeNDR	20160408
C. elegans	ED3052	ED3052	ED3052		CeNDR	20160408
C. elegans	ED3073	ED3073	ED3073		CeNDR	20160408
C. elegans	ED3077	ED3077	ED3077		CeNDR	20160408
C. elegans	EG4347	EG4347	EG4347		CeNDR	20160408
C. elegans	EG4349	EG4349	EG4349		CeNDR	20160408
C. elegans	EG4724	EG4724	EG4724		CeNDR	20160408
C. elegans	EG4725	EG4725	EG4725		CeNDR	20160408
C. elegans	EG4946	EG4946	EG4946		CeNDR	20160408
C. elegans	GXW1	GXW1	GXW1		CeNDR	20160408
C. elegans	JT11398	JT11398	JT11398		CeNDR	20160408
C. elegans	JU1088	JU1088	JU1088		CeNDR	20160408
C. elegans	JU1172	JU1172	JU1172		CeNDR	20160408
C. elegans	JU1200	JU1200	JU1200		CeNDR	20160408
C. elegans	JU1212	JU1212	JU1212		CeNDR	20160408
C. elegans	JU1213	JU1213	JU1213		CeNDR	20160408
C. elegans	JU1242	JU1242	JU1242		CeNDR	20160408
C. elegans	JU1246	JU1246	JU1246		CeNDR	20160408
C. elegans	JU1249	JU1249	JU1249		CeNDR	20170531
C. elegans	JU1395	JU1395	JU1395		CeNDR	20160408
C. elegans	JU1400	JU1400	JU1400		CeNDR	20160408
C. elegans	JU1409	JU1409	JU1409		CeNDR	20160408
C. elegans	JU1440	JU1440	JU1440		CeNDR	20160408
C. elegans	JU1491	JU1491	JU1491		CeNDR	20160408
C. elegans	JU1530	JU1530	JU1530		CeNDR	20160408
C. elegans	JU1543	JU1543	JU1543		CeNDR	20170531
C. elegans	JU1568	JU1568	JU1568		CeNDR	20160408
C. elegans	JU1580	JU1580	JU1580		CeNDR	20160408
C. elegans	JU1581	JU1581	JU1581		CeNDR	20160408
C. elegans	JU1586	JU1586	JU1586		CeNDR	20160408
C. elegans	JU1652	JU1652	JU1652		CeNDR	20160408
C. elegans	JU1666	JU1666	JU1666		CeNDR	20170531
C. elegans	JU1792	JU1792	JU1792		CeNDR	20170531
C. elegans	JU1793	JU1793	JU1793		CeNDR	20170531
C. elegans	JU1808	JU1808	JU1808		CeNDR	20170531
C. elegans	JU1896	JU1896	JU1896		CeNDR	20160408
C. elegans	JU1934	JU1934	JU1934		CeNDR	20170531
C. elegans	JU2001	JU2001	JU2001		CeNDR	20160408
C. elegans	JU2007	JU2007	JU2007		CeNDR	20160408
C. elegans	JU2016	JU2016	JU2016		CeNDR	20170531
C. elegans	JU2017	JU2017	JU2017		CeNDR	20170531
C. elegans	JU2106	JU2106	JU2106		CeNDR	20170531
C. elegans	JU2131	JU2131	JU2131		CeNDR	20170531
C. elegans	JU2141	JU2141	JU2141		CeNDR	20170531
C. elegans	JU2234	JU2234	JU2234		CeNDR	20170531
C. elegans	JU2250	JU2250	JU2250		CeNDR	20170531
C. elegans	JU2257	JU2257	JU2257		CeNDR	20170531
C. elegans	JU2316	JU2316	JU2316		CeNDR	20160408
C. elegans	JU2464	JU2464	JU2464		CeNDR	20160408
C. elegans	JU2466	JU2466	JU2466		CeNDR	20160408
C. elegans	JU2478	JU2478	JU2478		CeNDR	20170531
C. elegans	JU2513	JU2513	JU2513		CeNDR	20160408
C. elegans	JU2519	JU2519	JU2519		CeNDR	20160408
C. elegans	JU2522	JU2522	JU2522		CeNDR	20160408
C. elegans	JU2526	JU2526	JU2526		CeNDR	20160408
C. elegans	JU2534	JU2534	JU2534		CeNDR	20170531
C. elegans	JU2565	JU2565	JU2565		CeNDR	20170531
C. elegans	JU2566	JU2566	JU2566		CeNDR	20170531
C. elegans	JU2570	JU2570	JU2570		CeNDR	20170531
C. elegans	JU2572	JU2572	JU2572		CeNDR	20170531
C. elegans	JU2575	JU2575	JU2575		CeNDR	20170531
C. elegans	JU2576	JU2576	JU2576		CeNDR	20170531
C. elegans	JU2578	JU2578	JU2578		CeNDR	20170531
C. elegans	JU258	JU258	JU258		CeNDR	20160408
C. elegans	JU2581	JU2581	JU2581		CeNDR	20170531
C. elegans	JU2586	JU2586	JU2586		CeNDR	20170531
C. elegans	JU2587	JU2587	JU2587		CeNDR	20170531
C. elegans	JU2592	JU2592	JU2592		CeNDR	20170531
C. elegans	JU2593	JU2593	JU2593		CeNDR	20170531
C. elegans	JU2600	JU2600	JU2600		CeNDR	20170531
C. elegans	JU2610	JU2610	JU2610		CeNDR	20170531
C. elegans	JU2619	JU2619	JU2619		CeNDR	20170531
C. elegans	JU2800	JU2800	JU2800		CeNDR	20170531
C. elegans	JU2811	JU2811	JU2811		CeNDR	20170531
C. elegans	JU2825	JU2825	JU2825		CeNDR	20170531
C. elegans	JU2829	JU2829	JU2829		CeNDR	20170531
C. elegans	JU2838	JU2838	JU2838		CeNDR	20170531
C. elegans	JU2841	JU2841	JU2841		CeNDR	20170531
C. elegans	JU2853	JU2853	JU2853		CeNDR	20170531
C. elegans	JU2862	JU2862	JU2862		CeNDR	20170531
C. elegans	JU2866	JU2866	JU2866		CeNDR	20170531
C. elegans	JU2878	JU2878	JU2878		CeNDR	20170531
C. elegans	JU2879	JU2879	JU2879		CeNDR	20170531
C. elegans	JU2906	JU2906	JU2906		CeNDR	20170531
C. elegans	JU2907	JU2907	JU2907		CeNDR	20170531
C. elegans	JU310	JU310	JU310		CeNDR	20160408
C. elegans	JU311	JU311	JU311		CeNDR	20160408
C. elegans	JU3125	JU3125	JU3125		CeNDR	20170531
C. elegans	JU3127	JU3127	JU3127		CeNDR	20170531
C. elegans	JU3128	JU3128	JU3128		CeNDR	20170531
C. elegans	JU3132	JU3132	JU3132		CeNDR	20170531
C. elegans	JU3134	JU3134	JU3134		CeNDR	20170531
C. elegans	JU3135	JU3135	JU3135		CeNDR	20170531
C. elegans	JU3137	JU3137	JU3137		CeNDR	20170531
C. elegans	JU3140	JU3140	JU3140		CeNDR	20170531
C. elegans	JU3144	JU3144	JU3144		CeNDR	20170531
C. elegans	JU323	JU323	JU323		CeNDR	20160408
C. elegans	JU346	JU346	JU346		CeNDR	20160408
C. elegans	JU360	JU360	JU360		CeNDR	20160408
C. elegans	JU367	JU367	JU367		CeNDR	20160408
C. elegans	JU393	JU393	JU393		CeNDR	20160408
C. elegans	JU394	JU394	JU394		CeNDR	20160408
C. elegans	JU397	JU397	JU397		CeNDR	20160408
C. elegans	JU406	JU406	JU406		CeNDR	20160408
C. elegans	JU440	JU440	JU440		CeNDR	20160408
C. elegans	JU561	JU561	JU561		CeNDR	20160408
C. elegans	JU642	JU642	JU642		CeNDR	20160408
C. elegans	JU751	JU751	JU751		CeNDR	20160408
C. elegans	JU774	JU774	JU774		CeNDR	20160408
C. elegans	JU775	JU775	JU775		CeNDR	20160408
C. elegans	JU778	JU778	JU778		CeNDR	20160408
C. elegans	JU782	JU782	JU782		CeNDR	20160408
C. elegans	JU792	JU792	JU792		CeNDR	20160408
C. elegans	JU830	JU830	JU830		CeNDR	20160408
C. elegans	JU847	JU847	JU847		CeNDR	20160408
C. elegans	KR314	KR314	KR314		CeNDR	20160408
C. elegans	LKC34	LKC34	LKC34		CeNDR	20160408
C. elegans	LSJ1	LSJ1	LSJ1		CeNDR	20160408
C. elegans	MY1	MY1	MY1		CeNDR	20160408
C. elegans	MY10	MY10	MY10		CeNDR	20160408
C. elegans	MY16	MY16	MY16		CeNDR	20160408
C. elegans	MY18	MY18	MY18		CeNDR	20160408
C. elegans	MY2147	MY2147	MY2147		CeNDR	20170531
C. elegans	MY2212	MY2212	MY2212		CeNDR	20170531
C. elegans	MY23	MY23	MY23		CeNDR	20160408
C. elegans	MY2453	MY2453	MY2453		CeNDR	20170531
C. elegans	MY2530	MY2530	MY2530		CeNDR	20170531
C. elegans	MY2535	MY2535	MY2535		CeNDR	20170531
C. elegans	MY2573	MY2573	MY2573		CeNDR	20170531
C. elegans	MY2585	MY2585	MY2585		CeNDR	20170531
C. elegans	MY2693	MY2693	MY2693		CeNDR	20170531
C. elegans	MY2713	MY2713	MY2713		CeNDR	20170531
C. elegans	MY2741	MY2741	MY2741		CeNDR	20170531
C. elegans	MY518	MY518	MY518		CeNDR	20170531
C. elegans	MY679	MY679	MY679		CeNDR	20170531
C. elegans	MY772	MY772	MY772		CeNDR	20170531
C. elegans	MY795	MY795	MY795		CeNDR	20170531
C. elegans	MY920	MY920	MY920		CeNDR	20170531
C. elegans	N2	N2	N2		CeNDR	20160408
C. elegans	NIC1	NIC1	NIC1		CeNDR	20160408
C. elegans	NIC1049	NIC1049	NIC1049		CeNDR	20170531
C. elegans	NIC1107	NIC1107	NIC1107		CeNDR	20170531
C. elegans	NIC166	NIC166	NIC166		CeNDR	20160408
C. elegans	NIC195	NIC195	NIC195		CeNDR	20160408
C. elegans	NIC199	NIC199	NIC199		CeNDR	20160408
C. elegans	NIC2	NIC2	NIC2		CeNDR	20160408
C. elegans	NIC207	NIC207	NIC207		CeNDR	20160408
C. elegans	NIC231	NIC231	NIC231		CeNDR	20160408
C. elegans	NIC236	NIC236	NIC236		CeNDR	20160408
C. elegans	NIC242	NIC242	NIC242		CeNDR	20160408
C. elegans	NIC251	NIC251	NIC251		CeNDR	20160408
C. elegans	NIC252	NIC252	NIC252		CeNDR	20160408
C. elegans	NIC255	NIC255	NIC255		CeNDR	20160408
C. elegans	NIC256	NIC256	NIC256		CeNDR	20160408
C. elegans	NIC258	NIC258	NIC258		CeNDR	20160408
C. elegans	NIC259	NIC259	NIC259		CeNDR	20160408
C. elegans	NIC260	NIC260	NIC260		CeNDR	20160408
C. elegans	NIC261	NIC261	NIC261		CeNDR	20160408
C. elegans	NIC262	NIC262	NIC262		CeNDR	20160408
C. elegans	NIC265	NIC265	NIC265		CeNDR	20160408
C. elegans	NIC266	NIC266	NIC266		CeNDR	20160408
C. elegans	NIC267	NIC267	NIC267		CeNDR	20160408
C. elegans	NIC268	NIC268	NIC268		CeNDR	20160408
C. elegans	NIC269	NIC269	NIC269		CeNDR	20160408
C. elegans	NIC271	NIC271	NIC271		CeNDR	20160408
C. elegans	NIC272	NIC272	NIC272		CeNDR	20160408
C. elegans	NIC274	NIC274	NIC274		CeNDR	20160408
C. elegans	NIC275	NIC275	NIC275		CeNDR	20160408
C. elegans	NIC276	NIC276	NIC276		CeNDR	20160408
C. elegans	NIC277	NIC277	NIC277		CeNDR	20160408
C. elegans	NIC3	NIC3	NIC3		CeNDR	20160408
C. elegans	NIC501	NIC501	NIC501		CeNDR	20170531
C. elegans	NIC511	NIC511	NIC511		CeNDR	20170531
C. elegans	NIC513	NIC513	NIC513		CeNDR	20170531
C. elegans	NIC514	NIC514	NIC514		CeNDR	20170531
C. elegans	NIC515	NIC515	NIC515		CeNDR	20170531
C. elegans	NIC522	NIC522	NIC522		CeNDR	20170531
C. elegans	NIC523	NIC523	NIC523		CeNDR	20170531
C. elegans	NIC526	NIC526	NIC526		CeNDR	20170531
C. elegans	NIC527	NIC527	NIC527		CeNDR	20170531
C. elegans	NIC528	NIC528	NIC528		CeNDR	20170531
C. elegans	NIC529	NIC529	NIC529		CeNDR	20170531
C. elegans	PB303	PB303	PB303		CeNDR	20160408
C. elegans	PB306	ECA259	ECA259	PB306 CGC|PB306	CeNDR	20160408
C. elegans	PS2025	PS2025	PS2025		CeNDR	20160408
C. elegans	PX179	PX179	PX179		CeNDR	20160408
C. elegans	QG2075	QG2075	QG2075		CeNDR	20160408
C. elegans	QG536	QG536	QG536		CeNDR	20160408
C. elegans	QG556	QG556	QG556		CeNDR	20160408
C. elegans	QG557	QG557	QG557		CeNDR	20160408
C. elegans	QW947	QW947	QW947		CeNDR	20160408
C. elegans	QX1211	QX1211	QX1211		CeNDR	20160408
C. elegans	QX1212	QX1212	QX1212		CeNDR	20160408
C. elegans	QX1233	QX1233	QX1233		CeNDR	20160408
C. elegans	QX1791	QX1791	QX1791		CeNDR	20160408
C. elegans	QX1792	QX1792	QX1792		CeNDR	20160408
C. elegans	QX1793	QX1793	QX1793		CeNDR	20160408
C. elegans	QX1794	QX1794	QX1794		CeNDR	20160408
C. elegans	RC301	RC301	RC301		CeNDR	20160408
C. elegans	WN2001	WN2001	WN2001		CeNDR	20160408
C. elegans	WN2002	WN2002	WN2002		CeNDR	20160408
C. elegans	WN2033	WN2033	WN2033		CeNDR	20170531
C. elegans	WN2050	WN2050	WN2050		CeNDR	20170531
C. elegans	XZ1513	XZ1513	XZ1513		CeNDR	20170531
C. elegans	XZ1514	XZ1514	XZ1514		CeNDR	20170531
C. elegans	XZ1515	XZ1515	XZ1515		CeNDR	20170531
C. elegans	XZ1516	XZ1516	XZ1516		CeNDR	20170531
C. oiwi	S-05114	NA	ECA1100		Andersen Lab	NA
C. oiwi	S-05113	NA	ECA814		Andersen Lab	NA
C. oiwi	S-05095	NA	ECA815		Andersen Lab	NA
C. oiwi	S-05103	NA	ECA816		Andersen Lab	NA
C. oiwi	S-05061	NA	ECA817		Andersen Lab	NA
C. oiwi	S-05075	NA	ECA818		Andersen Lab	NA
C. oiwi	S-05082	NA	ECA819		Andersen Lab	NA
C. oiwi	S-05046	NA	ECA820		Andersen Lab	NA
C. oiwi	S-05114	NA	ECA821		Andersen Lab	NA
C. oiwi	S-05637	NA	ECA823		Andersen Lab	NA
C. oiwi	S-05197	NA	ECA824		Andersen Lab	NA
C. oiwi	S-05214	NA	ECA826		Andersen Lab	NA
C. oiwi	S-07350	NA	ECA827		Andersen Lab	NA
C. tropicalis	S-05074	NA	ECA788		Andersen Lab	NA
C. tropicalis	S-05097	NA	ECA789		Andersen Lab	NA
C. tropicalis	S-05794	NA	ECA790		Andersen Lab	NA
C. tropicalis	S-05799	NA	ECA791		Andersen Lab	NA
C. tropicalis	S-05800	NA	ECA792		Andersen Lab	NA
C. tropicalis	S-05918	NA	ECA793		Andersen Lab	NA
C. tropicalis	S-05795	NA	ECA794		Andersen Lab	NA
C. tropicalis	S-06105	NA	ECA795		Andersen Lab	NA
C. tropicalis	S-06150	NA	ECA796		Andersen Lab	NA
C. tropicalis	S-06168	NA	ECA797		Andersen Lab	NA
C. tropicalis	S-06192	NA	ECA798		Andersen Lab	NA
C. tropicalis	S-06195	NA	ECA799		Andersen Lab	NA
C. tropicalis	S-06621	NA	ECA800		Andersen Lab	NA
C. tropicalis	S-06622	NA	ECA801		Andersen Lab	NA
C. tropicalis	S-06623	NA	ECA802		Andersen Lab	NA
C. tropicalis	S-06624	NA	ECA803		Andersen Lab	NA
C. tropicalis	S-06687	NA	ECA804		Andersen Lab	NA
C. tropicalis	S-06690	NA	ECA805		Andersen Lab	NA
C. tropicalis	S-06715	NA	ECA806		Andersen Lab	NA
