# Supplementary figures and images for: Deep sampling of Hawaiian Caenorhabditis elegans reveals high genetic diversity and admixture with global populations
Source: eLife journal article supplement (doi:10.7554/elife.50465), 2019-12-03

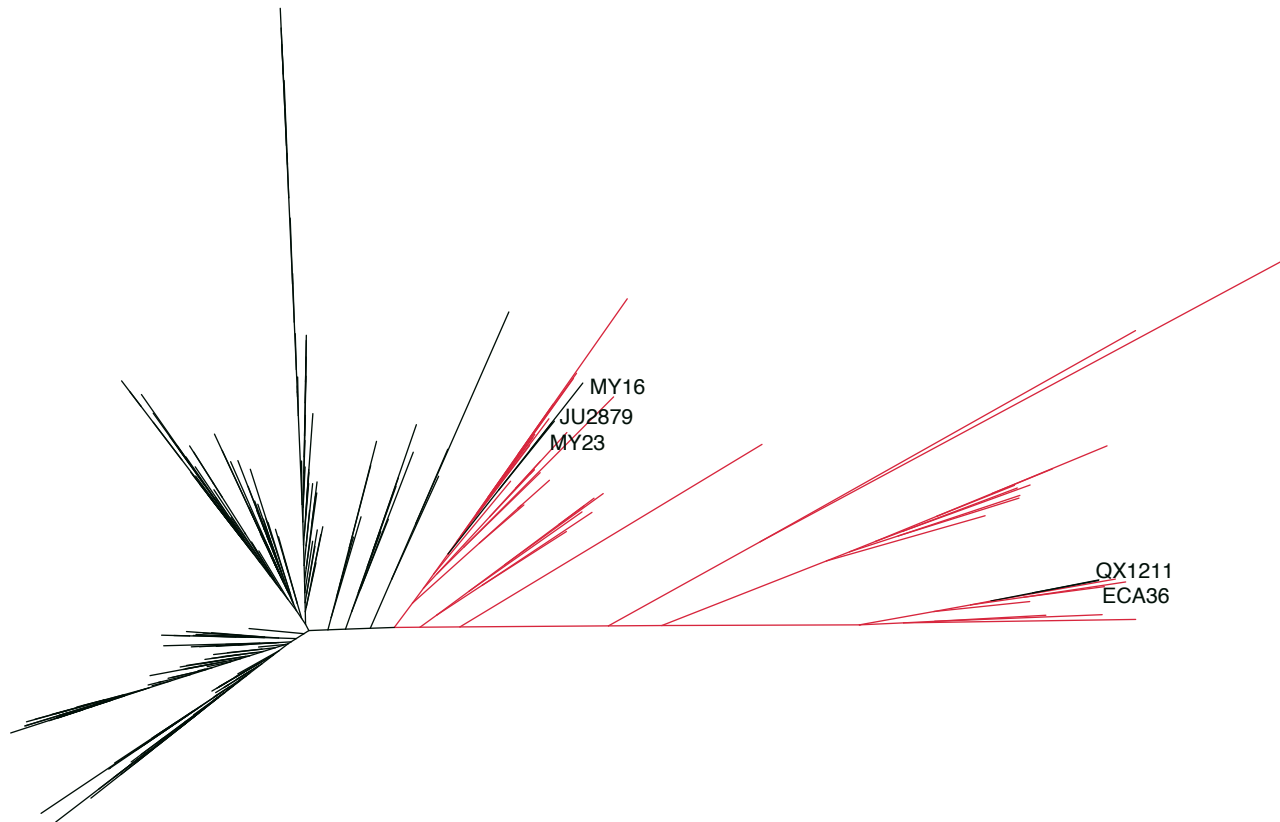

Supplement: supp [file elife-50465-supp-v1.zip › elife_poa_e50465_Figure_4_figure_supplement_1.pdf]

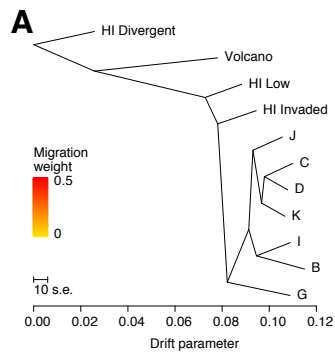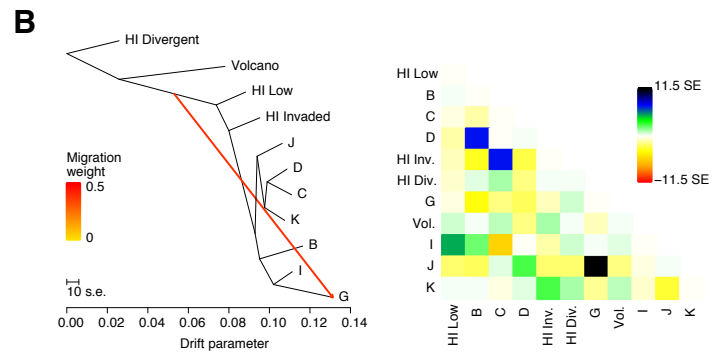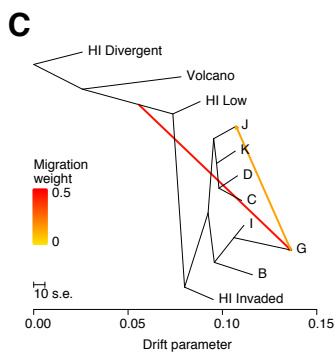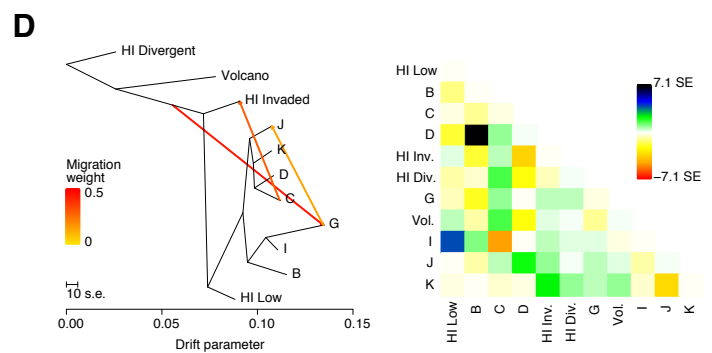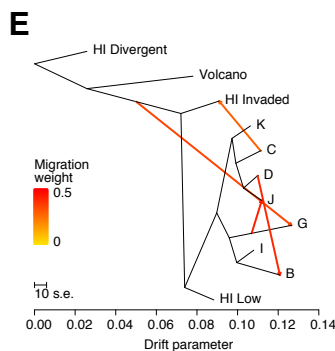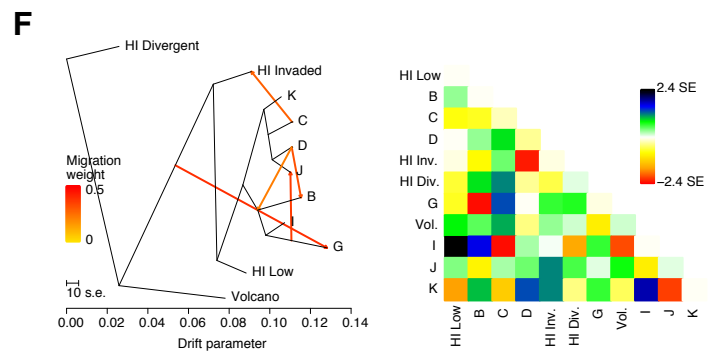

Supplement: supp [file elife-50465-supp-v1.zip › elife_poa_e50465_Figure_7_figure_supplement_1.pdf]

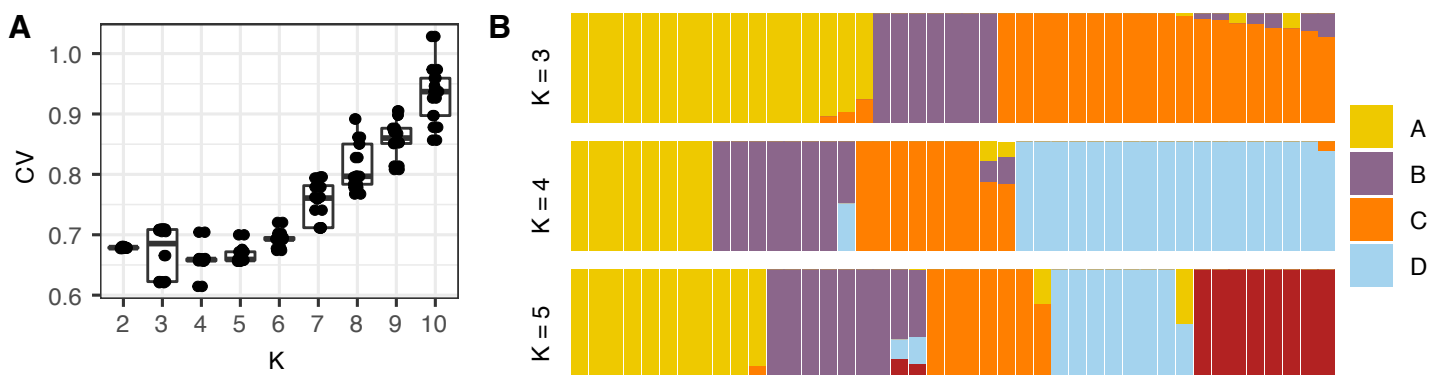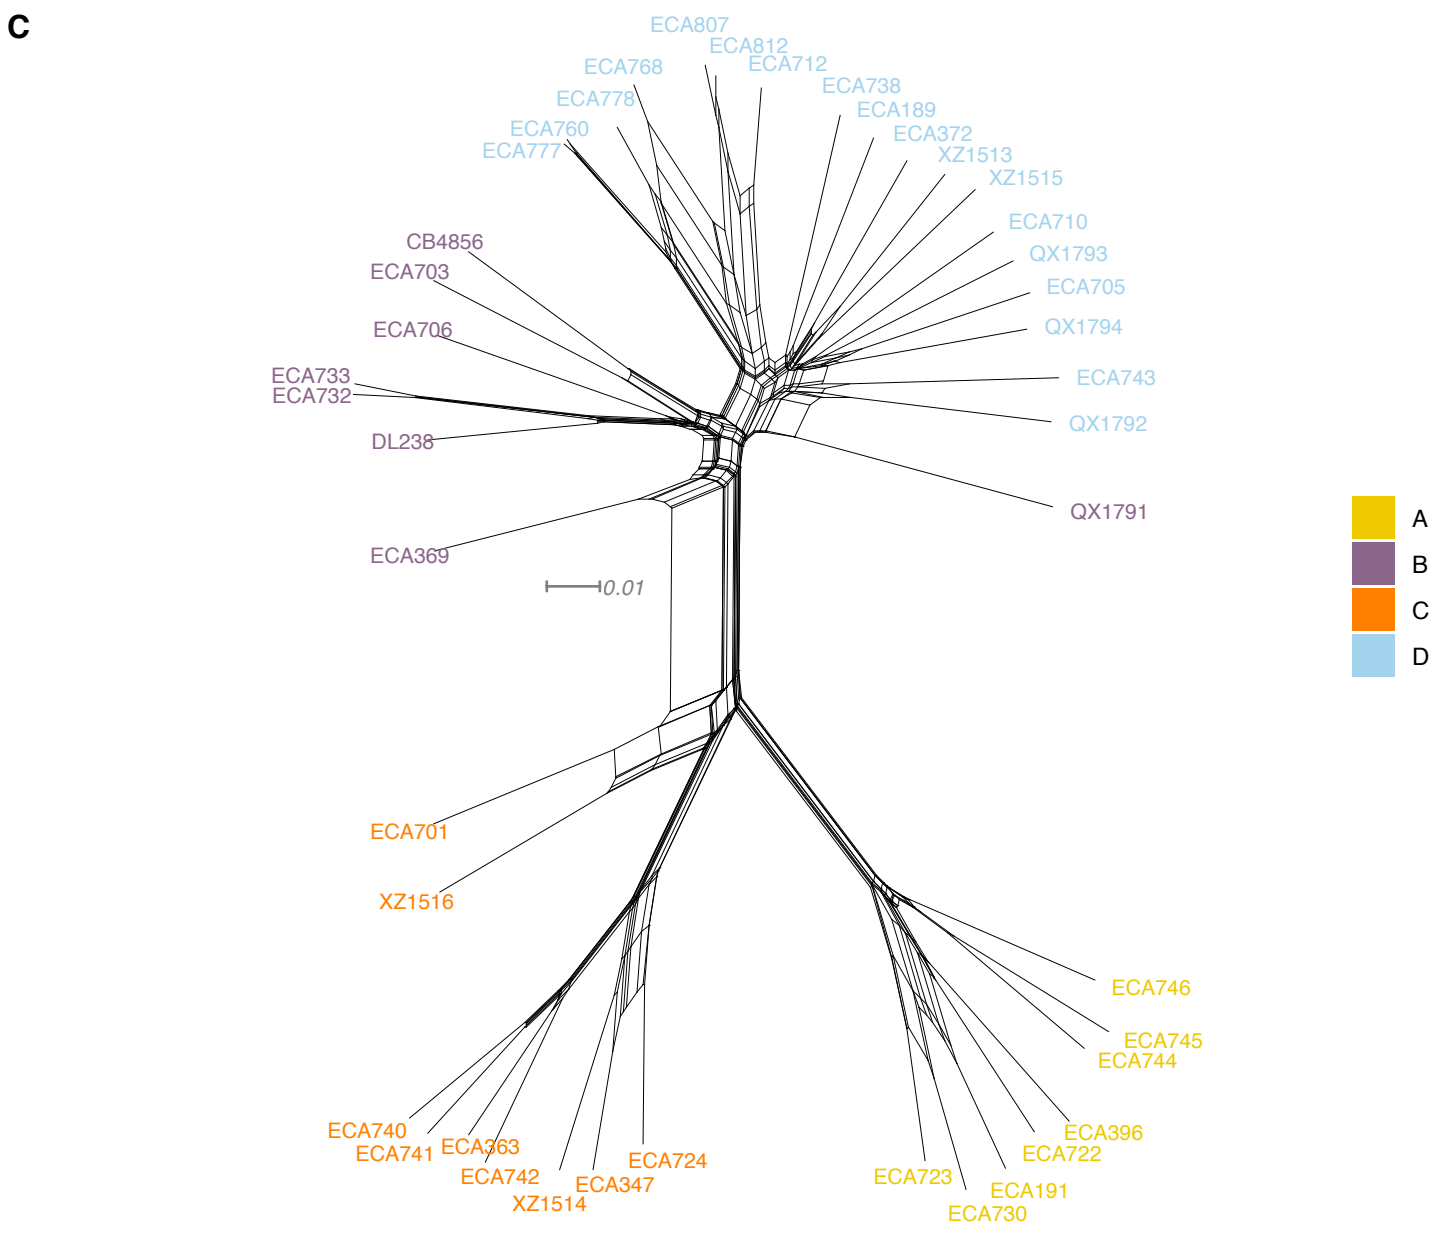

Supplement: supp [file elife-50465-supp-v1.zip › elife_poa_e50465_Figure_5_figure_supplement_4.pdf]

**A**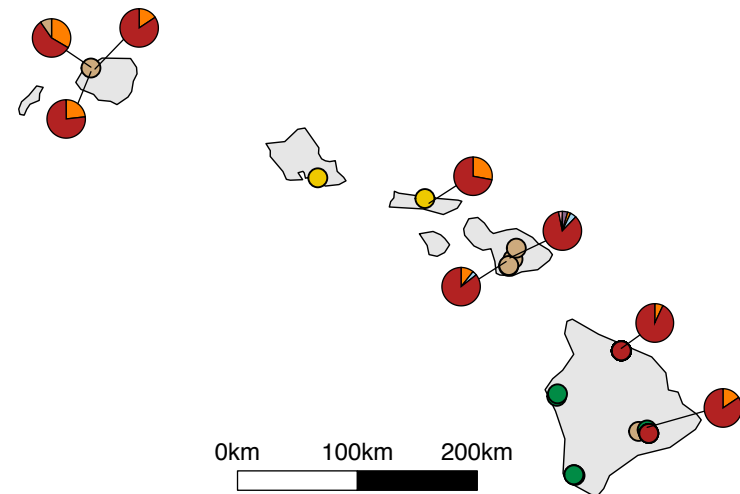**B**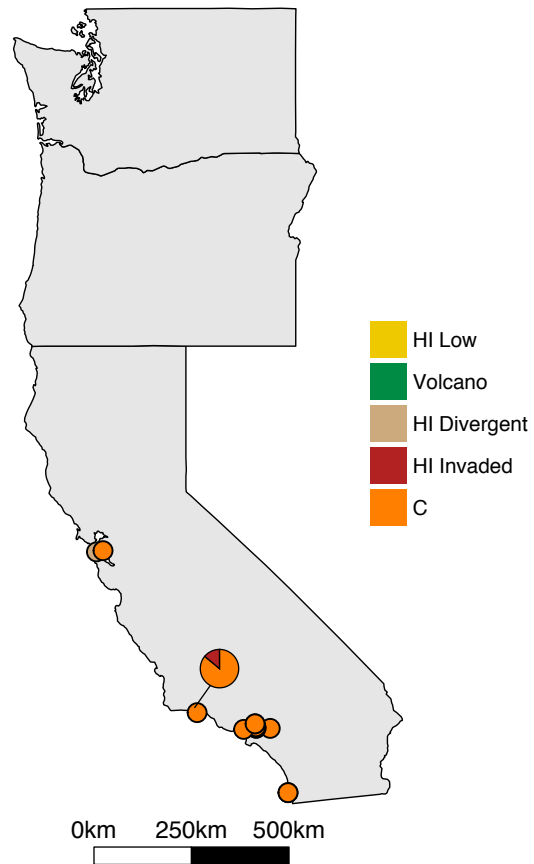

Supplement: supp [file elife-50465-supp-v1.zip › elife_poa_e50465_Figure_6_figure_supplement_1.pdf]

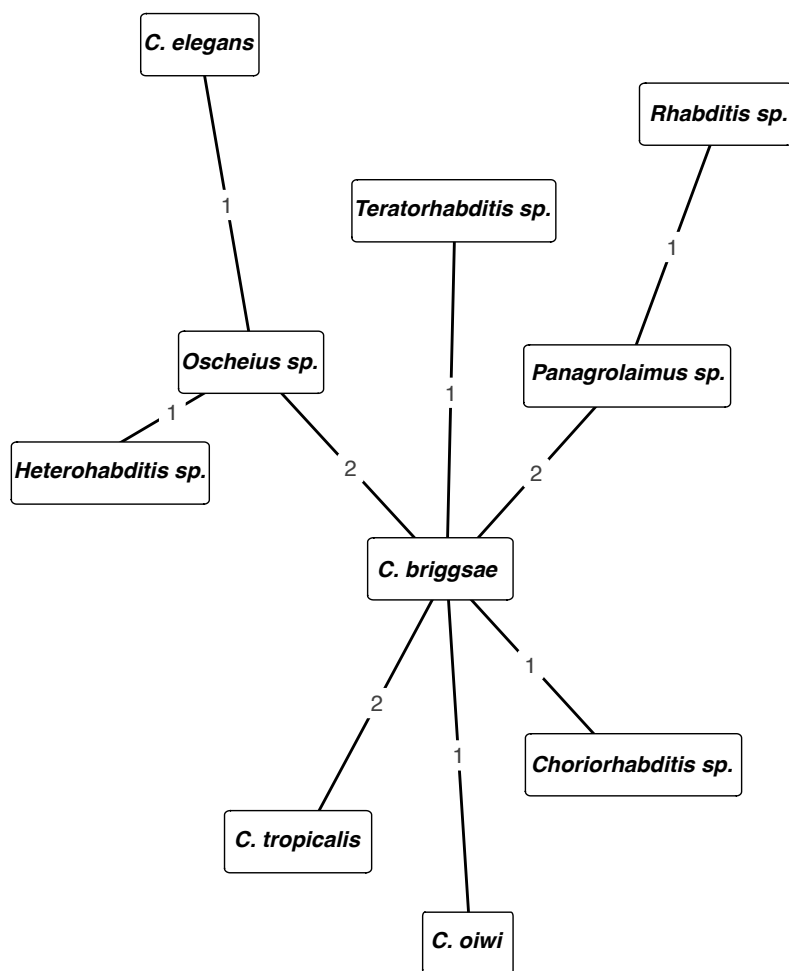

Supplement: supp [file elife-50465-supp-v1.zip › elife_poa_e50465_Figure_3_figure_supplement_2.pdf]

**A**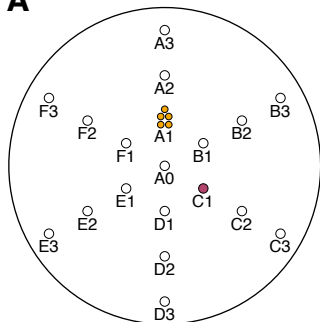

Gridsect 1

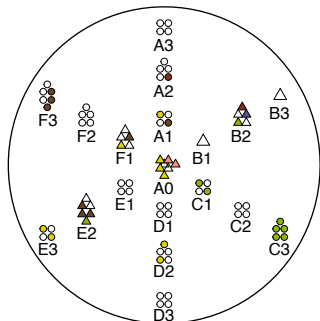

Gridsect 3

**Substrates**

- Leaf litter
- △ Fruit

**Isotopes**

- ECA712
- ECA730
- ECA760
- ECA768
- ECA777
- ECA778
- ECA807
- ECA812

**B**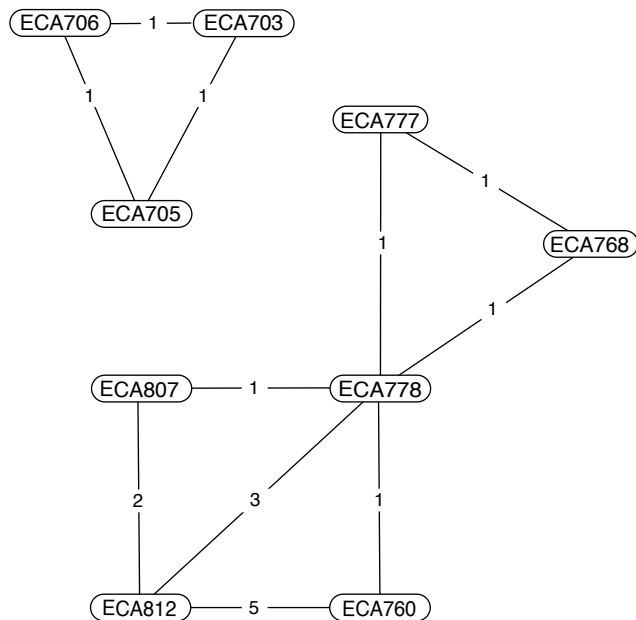

Supplement: supp [file elife-50465-supp-v1.zip › elife_poa_e50465_Figure_3_figure_supplement_3.pdf]

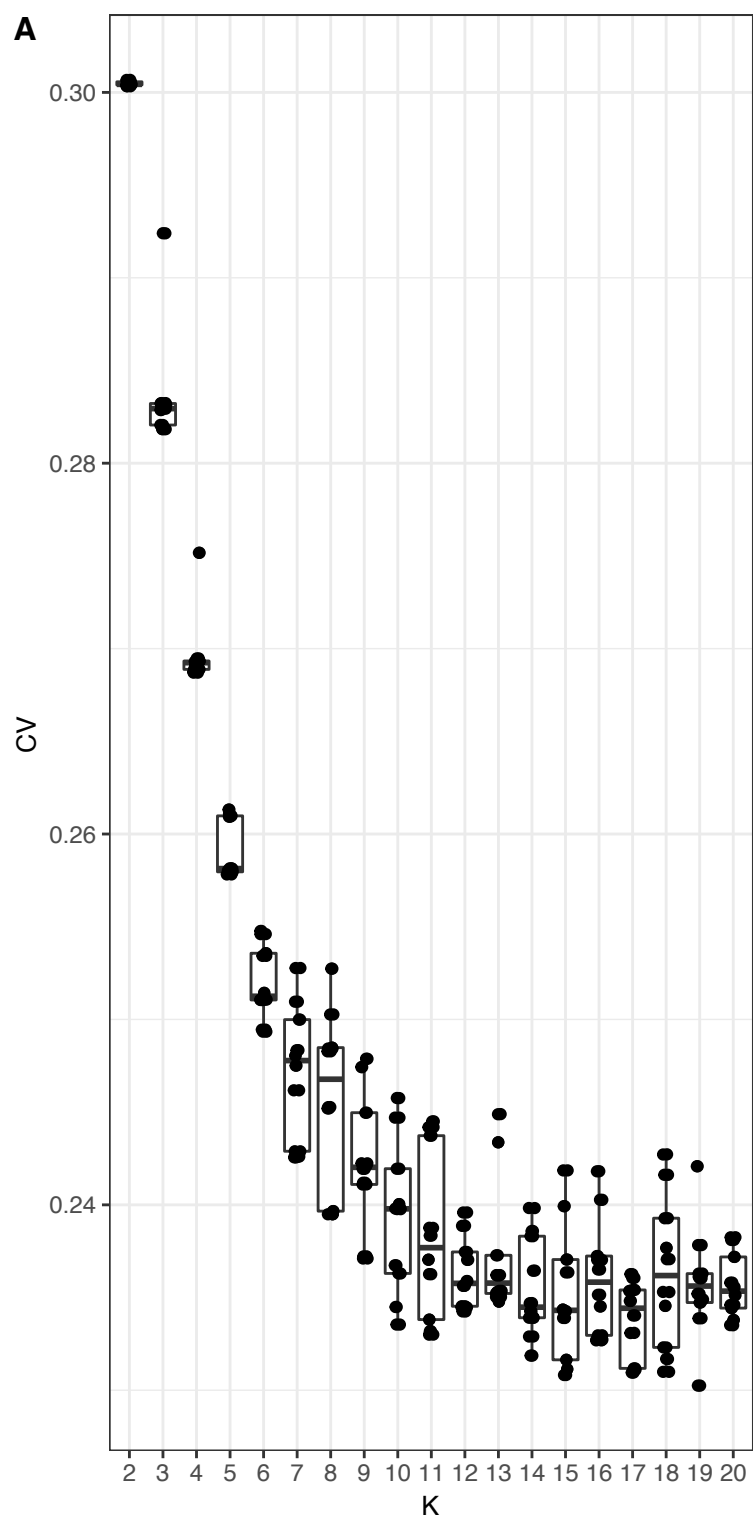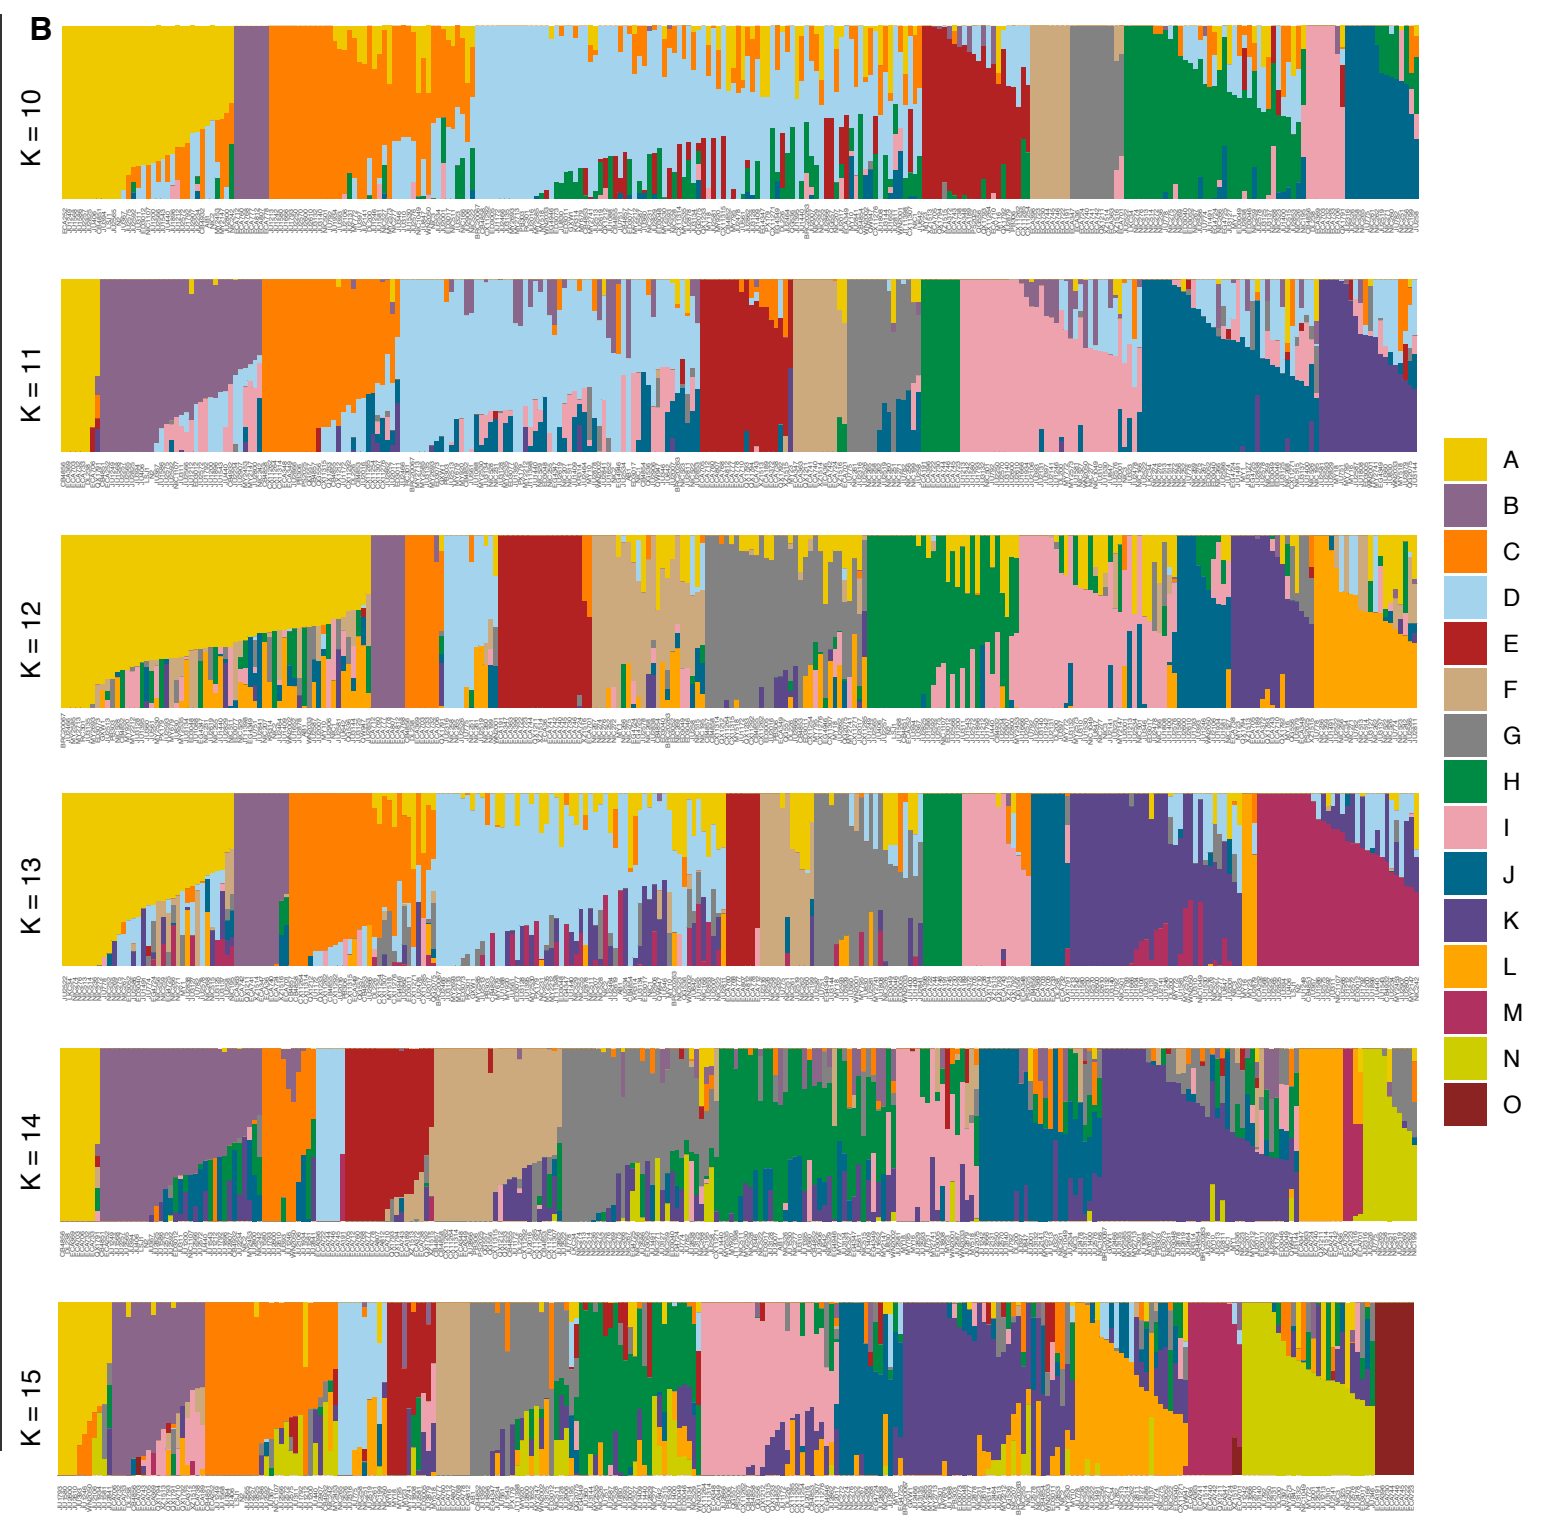

Supplement: supp [file elife-50465-supp-v1.zip › elife_poa_e50465_Figure_5_figure_supplement_1.pdf]

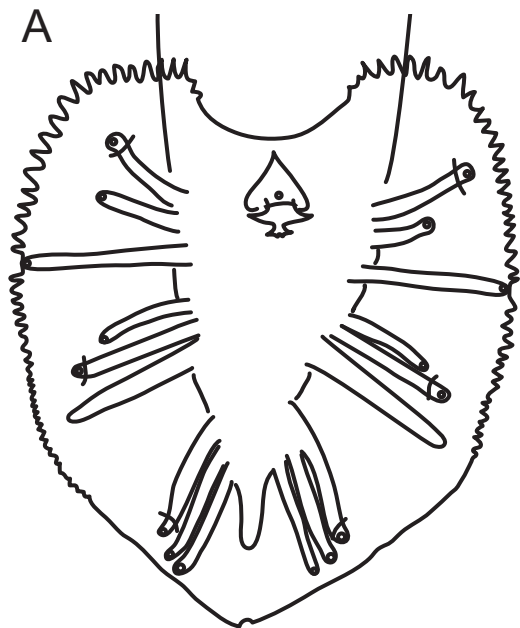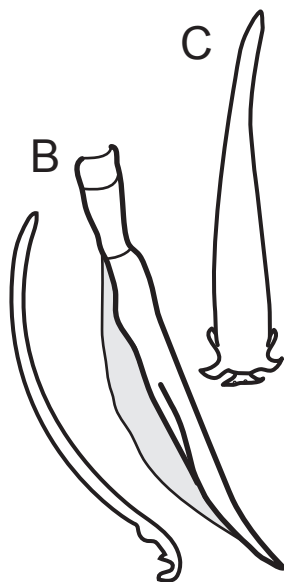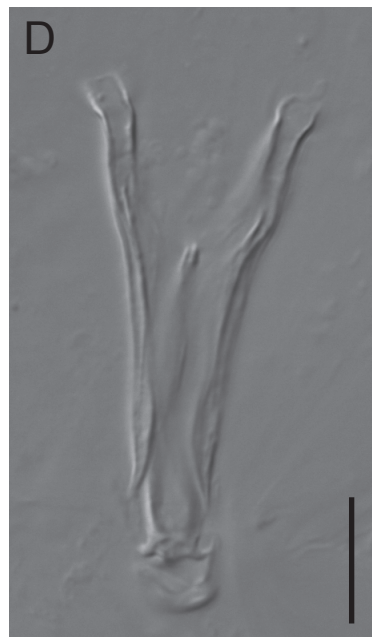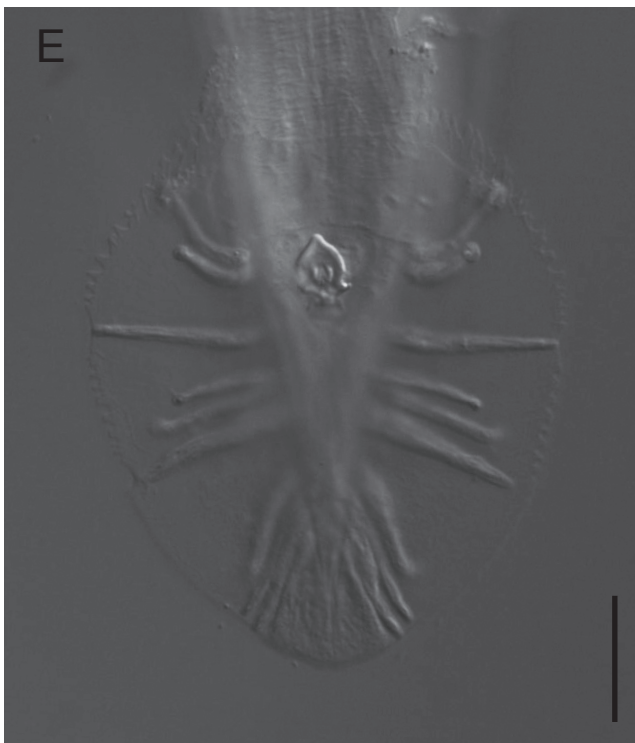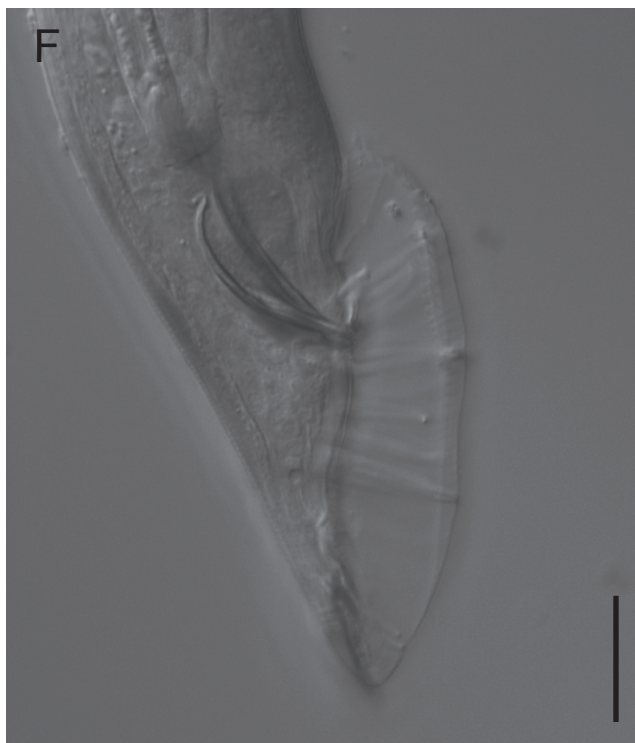

Supplement: supp [file elife-50465-supp-v1.zip › elife_poa_e50465_Figure_1_figure_supplement_2.pdf]

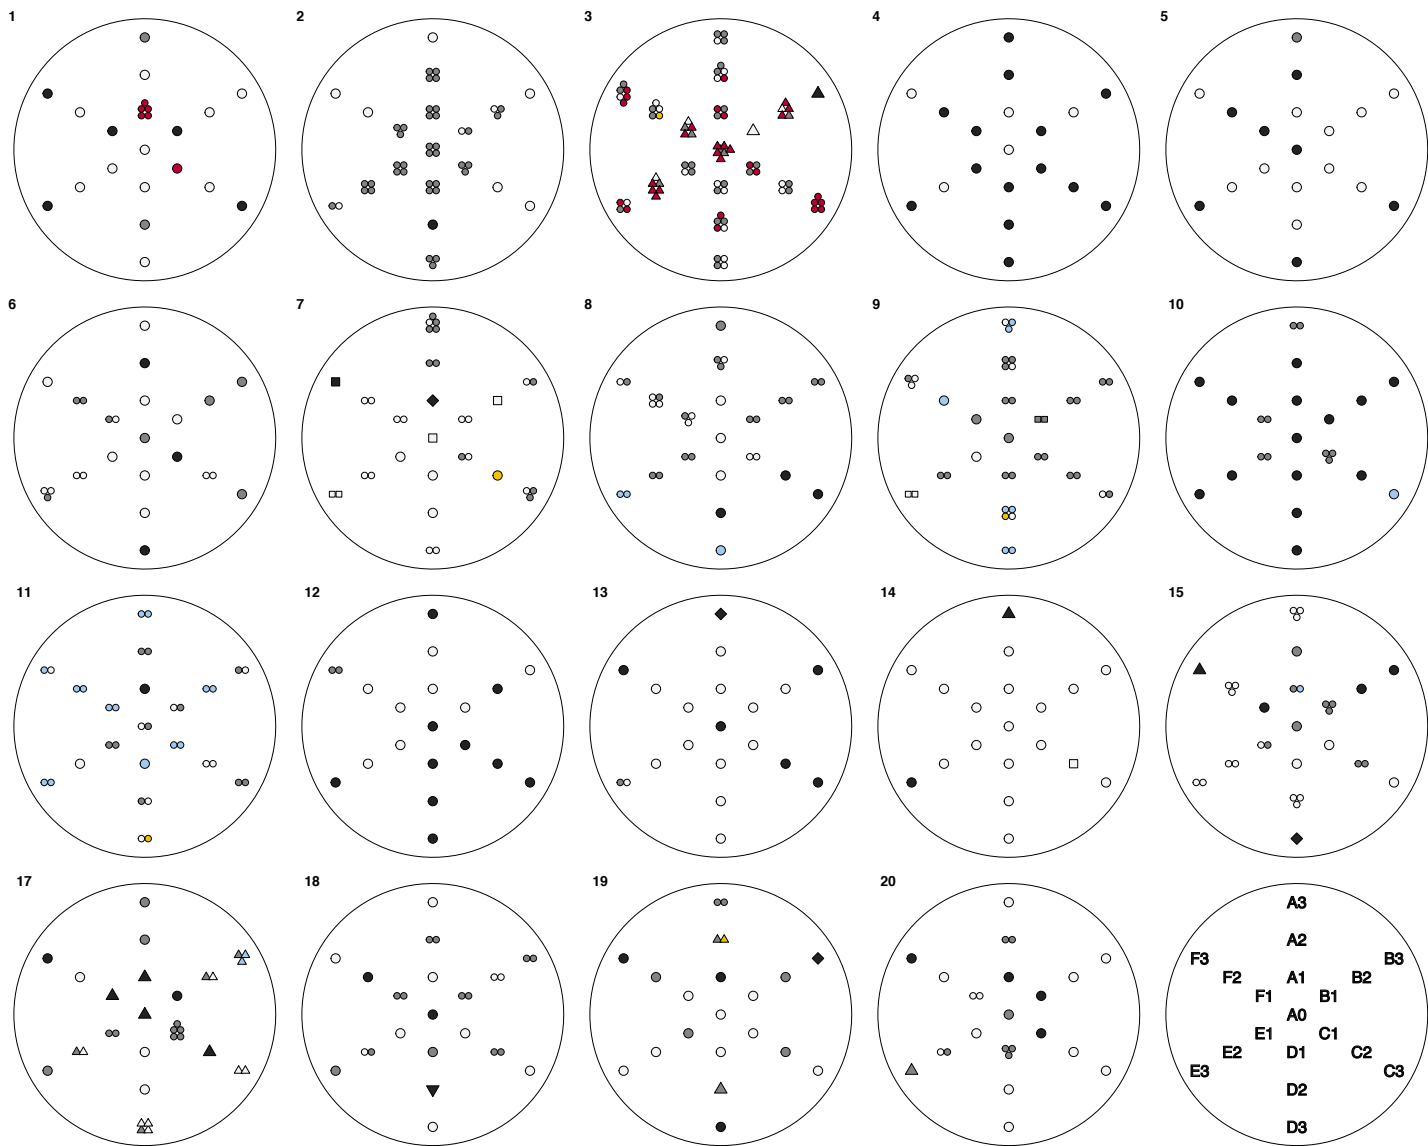

Supplement: supp [file elife-50465-supp-v1.zip › elife_poa_e50465_Figure_3_figure_supplement_1.pdf]

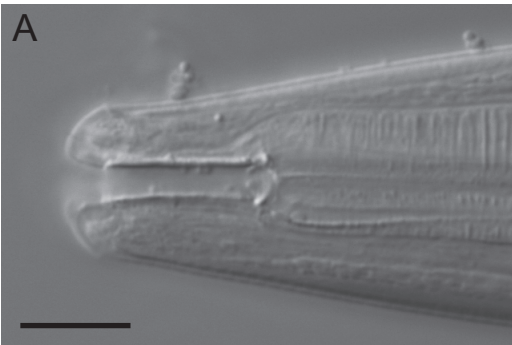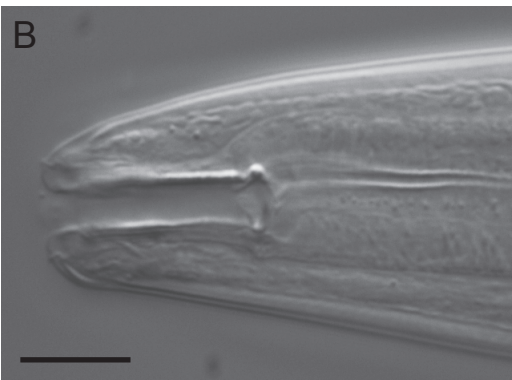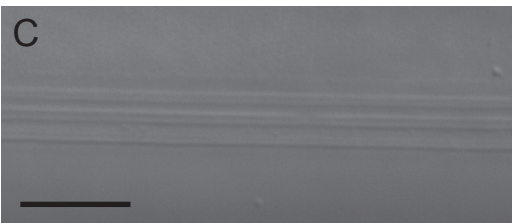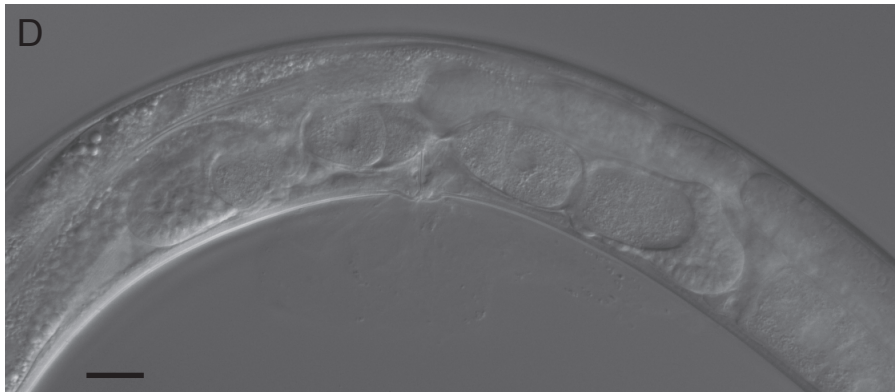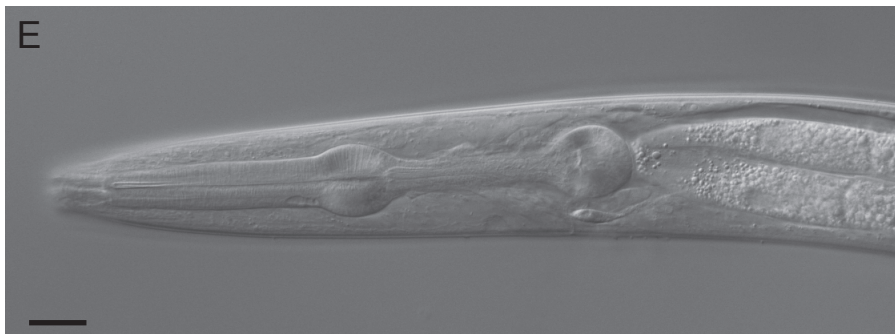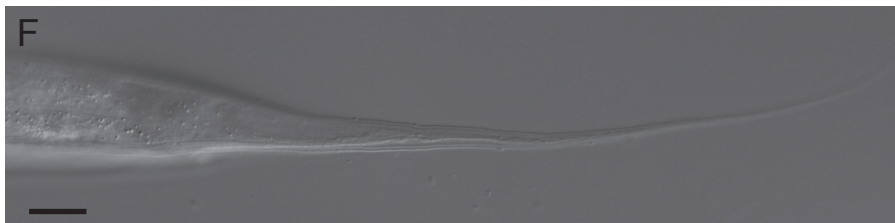

Supplement: supp [file elife-50465-supp-v1.zip › elife_poa_e50465_Figure_1_figure_supplement_1.pdf]

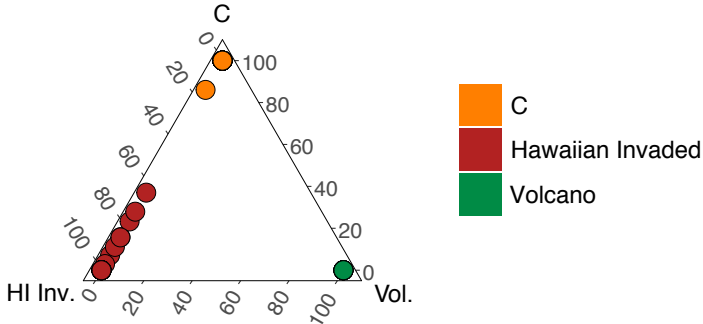

Supplement: supp [file elife-50465-supp-v1.zip › elife_poa_e50465_Figure_6_figure_supplement_2.pdf]

Fraction most common global haplotype

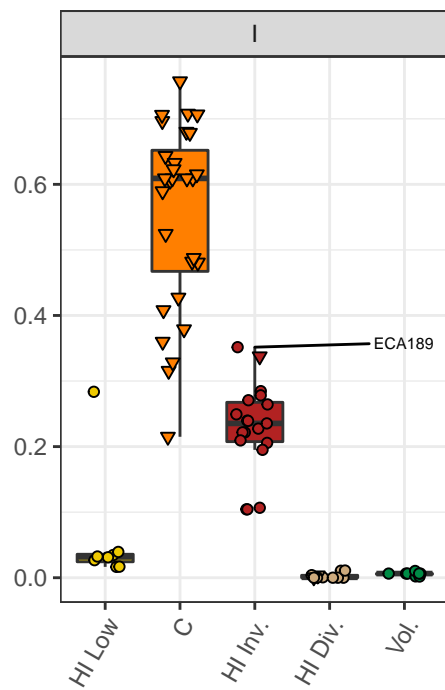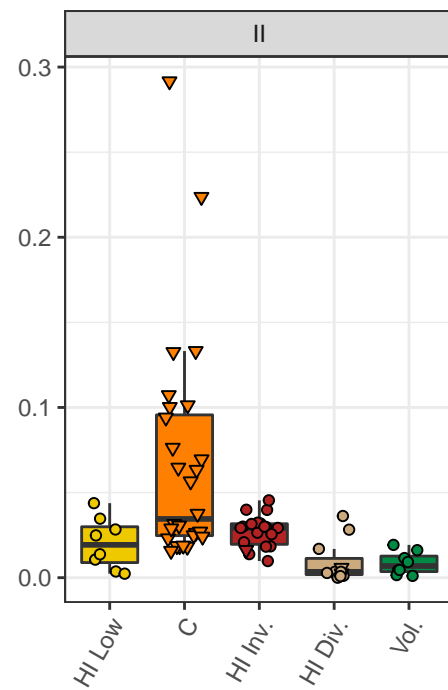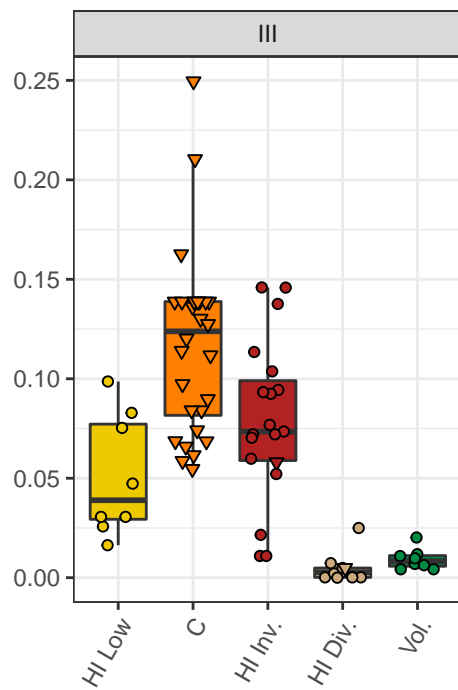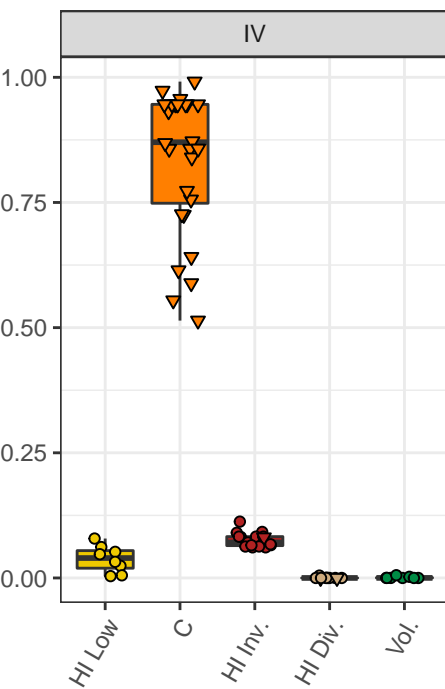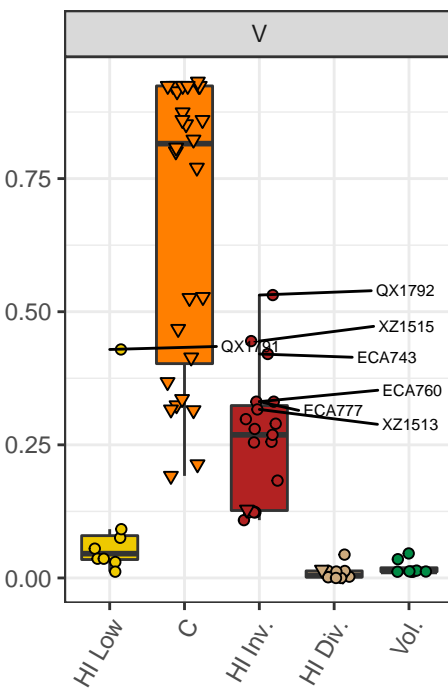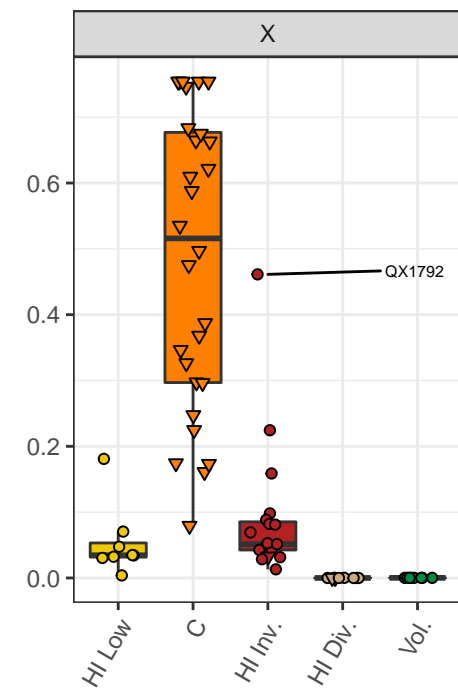

Supplement: supp [file elife-50465-supp-v1.zip › elife_poa_e50465_Figure_7_figure_supplement_2.pdf]

[illegible]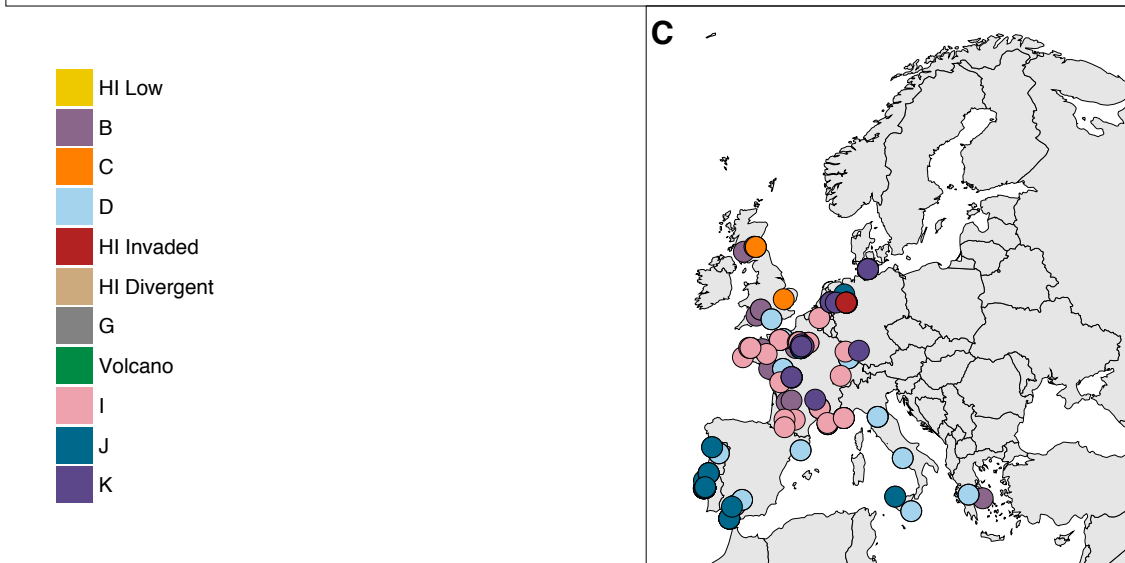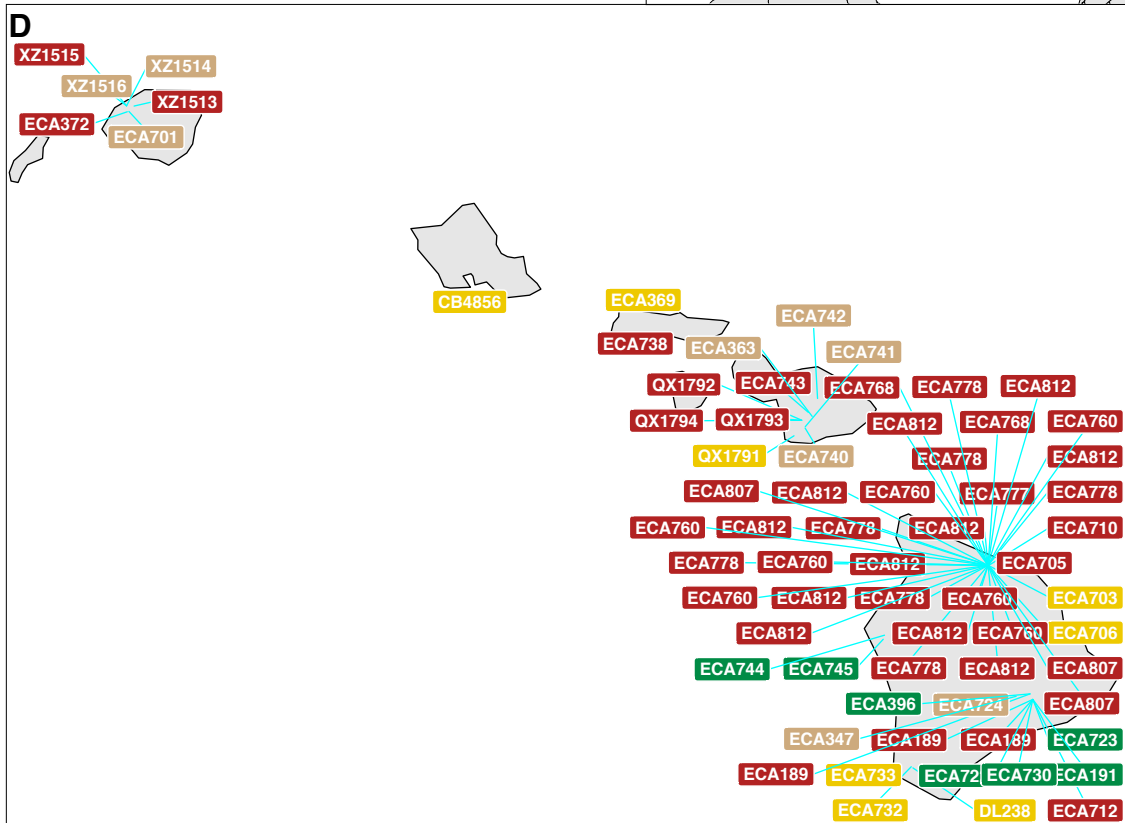

Supplement: supp [file elife-50465-supp-v1.zip › elife_poa_e50465_Figure_5_figure_supplement_2.pdf]

12-month temperature SD ( $^{\circ}\text{C}$ )

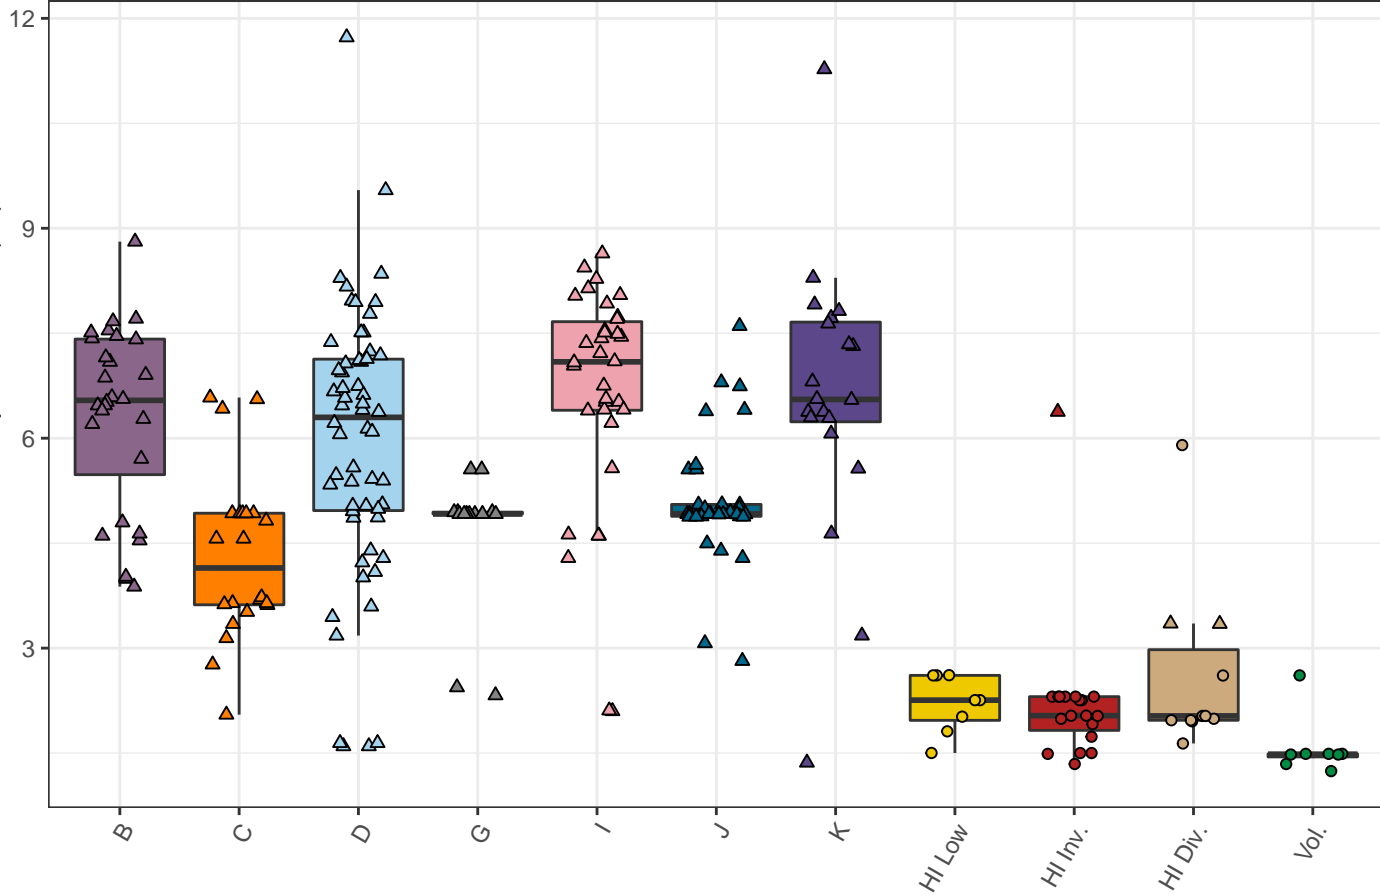

Supplement: supp [file elife-50465-supp-v1.zip › elife_poa_e50465_Figure_5_figure_supplement_3.pdf]
